# Supplementary material for: The comprehensive SARS-CoV-2 ‘hijackome’ knowledge base— reveals significant changes in host cell protein expression and activation by multiple SARS-CoV-2 variants
Source: Research Square preprint supplement (doi:10.21203/rs.3.rs-4322477/v1), 2024-05-10
Supplement: Supplementary file 2 [file 5711dd2682a74370f733fa34.xlsx]

## Sheet: Info
	EV07 - Suplemmentary results from DAVID functional annotation tool for BB, MF, CC, KEGG, and Reactome
	Sheet	Description
	Reactome	DAVID functional annotation tool Reactome results for BioID-MS data
	KEGG	DAVID functional annotation tool KEGG results for BioID-MS data
	CC	DAVID functional annotation tool Cellular comaprtment results for BioID-MS data
	BP	DAVID functional annotation tool Biological procesesses results for BioID-MS data
	MF	DAVID functional annotation tool Molecular function results for BioID-MS data

## Sheet: Reactome
Bait	categoryName	termName	id	geneIds	listHits	listTotals	popHits	popTotals	percent	foldEnrichment	fisher	ease	bonferroni	EASEBonferroni	benjamini	afdr	rfdr
Reactome_E P71L	DAVID Reactome	R-HSA-168255~Influenza Infection	720010045	Q9Y3U8, P62917, Q8TEM1, Q12849, P18124, P42766, P50914, P39023, Q00610, P62910, P40429, P83731, P27824, P62913, P62753, Q07020, P26373, P36578, Q8N1F7, O75694, P62266, Q02543, P62241, Q92621, Q5SRE5, P46776, P05388, P27797, P62424, P46778, P61513	31	180	157	10946	13.4199	12.0073	3.5182e-25	5.1369e-24	3.15919e-21	1.81539e-22	3.15919e-21	2.70201e-19	1.02571e-21
Reactome_E P71L	DAVID Reactome	R-HSA-8868773~rRNA processing in the nucleus and cytosol	720011644	Q9Y3U8, Q8IY81, P62917, P18124, Q9H583, Q9Y3A4, P42766, P50914, P39023, P62910, P40429, P83731, P62913, Q99848, P62753, P56182, Q07020, Q9UNQ2, P46087, P26373, Q13601, P36578, Q8IY37, O75691, P62266, Q9NW13, Q02543, P62241, P46776, P05388, P62424, P46778, P61513	33	180	195	10946	14.2857	10.2911	1.64056e-24	1.98673e-23	1.22184e-20	4.23263e-22	6.1092e-21	5.22511e-19	3.96702e-21
Reactome_E P71L	DAVID Reactome	R-HSA-72766~Translation	720011493	Q9Y3U8, P62917, Q12904, P18124, P42766, Q9NWU5, P50914, Q9P2J5, P41252, P39023, P62910, P40429, P47897, P83731, P62913, Q9NSE4, P62753, Q14232, O75616, Q07020, P82914, P04843, P49411, P26373, P36578, Q15629, O76094, P62266, Q02543, P62241, Q6P161, Q9UI10, P46776, P05388, P56192, P62424, P46778, P61513	38	180	292	10946	16.4502	7.91377	6.58495e-24	5.86973e-23	3.60989e-20	1.69892e-21	1.2033e-20	1.02916e-18	1.17204e-20
Reactome_E P71L	DAVID Reactome	R-HSA-72312~rRNA processing	720011482	Q9Y3U8, Q8IY81, P62917, P18124, Q9H583, Q9Y3A4, P42766, P50914, P39023, P62910, P40429, P83731, P62913, Q99848, P62753, P56182, Q07020, Q9UNQ2, P46087, P26373, Q13601, P36578, Q8IY37, O75691, P62266, Q9NW13, Q02543, P62241, P46776, P05388, P62424, P46778, P61513	33	180	205	10946	14.2857	9.78911	8.637e-24	9.85492e-23	6.06077e-20	6.68504e-21	1.51519e-20	1.29592e-18	1.96778e-20
Reactome_E P71L	DAVID Reactome	R-HSA-2408522~Selenoamino acid metabolism	720010424	Q9Y3U8, P62917, Q12904, P18124, P42766, P50914, Q9P2J5, P41252, P39023, P62910, P40429, P47897, P83731, P62913, P62753, Q07020, P26373, P36578, P62266, Q02543, P62241, P46776, P05388, P56192, P62424, P46778, P61513	27	180	119	10946	11.6883	13.7975	1.00663e-23	1.74813e-22	1.0751e-19	7.79133e-21	2.1502e-20	1.83903e-18	3.49058e-20
Reactome_E P71L	DAVID Reactome	R-HSA-168273~Influenza Viral RNA Transcription and Replication	720010050	Q9Y3U8, P62917, Q8TEM1, Q12849, P18124, P42766, P50914, P39023, P62910, P40429, P83731, P62913, P62753, Q07020, P26373, P36578, Q8N1F7, O75694, P62266, Q02543, P62241, Q92621, Q5SRE5, P46776, P05388, P62424, P46778, P61513	28	180	136	10946	12.1212	12.5199	2.49687e-23	3.83663e-22	2.35952e-19	1.93258e-20	3.93254e-20	3.36344e-18	7.66079e-20
Reactome_E P71L	DAVID Reactome	R-HSA-6791226~Major pathway of rRNA processing in the nucleolus and cytosol	720011341	Q9Y3U8, Q8IY81, P62917, P18124, Q9H583, Q9Y3A4, P42766, P50914, P39023, P62910, P40429, P83731, P62913, Q99848, P62753, P56182, Q07020, P26373, Q13601, P36578, Q8IY37, O75691, P62266, Q9NW13, Q02543, P62241, P46776, P05388, P62424, P46778, P61513	31	180	185	10946	13.4199	10.19	6.42835e-23	7.69045e-22	4.72963e-19	4.97555e-20	6.75661e-20	5.77883e-18	1.53559e-19
Reactome_E P71L	DAVID Reactome	R-HSA-1799339~SRP-dependent cotranslational protein targeting to membrane	720010133	Q9Y3U8, P62917, P18124, P42766, P50914, P39023, P62910, P40429, P83731, P62913, P62753, Q07020, P04843, P26373, P36578, Q15629, O76094, P62266, Q02543, P62241, P46776, P05388, P62424, P46778, P61513	25	180	113	10946	10.8225	13.4538	9.87e-22	1.6584e-20	1.01992e-17	2.03717e-18	1.2749e-18	1.0904e-16	3.31142e-18
Reactome_E P71L	DAVID Reactome	R-HSA-192823~Viral mRNA Translation	720010210	Q9Y3U8, Q07020, P26373, P62917, P36578, Q12849, P18124, P42766, P62266, P50914, Q02543, P39023, P62241, P40429, P62910, P83731, P62913, P46776, P62753, P62424, P05388, P46778, P61513	23	180	90	10946	9.95671	15.5406	1.30556e-21	2.64143e-20	1.62448e-17	2.35785e-18	1.80498e-18	1.54377e-16	5.27428e-18
Reactome_E P71L	DAVID Reactome	R-HSA-156902~Peptide chain elongation	720009921	Q9Y3U8, Q07020, P26373, P62917, P36578, P18124, P42766, P62266, P50914, Q02543, P39023, P62241, P40429, P62910, P83731, P62913, P46776, P62753, P62424, P05388, P46778, P61513	22	180	90	10946	9.52381	14.8649	2.99022e-20	5.70294e-19	3.50731e-16	5.40033e-17	3.50731e-17	2.99975e-15	1.13874e-16
Reactome_E P71L	DAVID Reactome	R-HSA-72737~Cap-dependent Translation Initiation	720011491	Q9Y3U8, Q07020, P26373, P62917, P36578, P18124, P42766, P62266, P50914, Q02543, P39023, P62241, P40429, P62910, Q9UI10, P83731, P62913, P46776, P62753, Q14232, P62424, P05388, P46778, P61513	24	180	120	10946	10.3896	12.1622	8.55663e-20	1.26638e-18	7.78825e-16	6.62284e-17	6.17786e-17	5.28383e-15	2.52865e-16
Reactome_E P71L	DAVID Reactome	R-HSA-72613~Eukaryotic Translation Initiation	720011483	Q9Y3U8, Q07020, P26373, P62917, P36578, P18124, P42766, P62266, P50914, Q02543, P39023, P62241, P40429, P62910, Q9UI10, P83731, P62913, P46776, P62753, Q14232, P62424, P05388, P46778, P61513	24	180	120	10946	10.3896	12.1622	8.55663e-20	1.26638e-18	7.78825e-16	6.62284e-17	6.17786e-17	5.28383e-15	2.52865e-16
Reactome_E P71L	DAVID Reactome	R-HSA-156842~Eukaryotic Translation Elongation	720009920	Q9Y3U8, Q07020, P26373, P62917, P36578, P18124, P42766, P62266, P50914, Q02543, P39023, P62241, P40429, P62910, P83731, P62913, P46776, P62753, P62424, P05388, P46778, P61513	22	180	94	10946	9.52381	14.2324	8.35858e-20	1.5068e-18	9.26679e-16	1.72521e-16	6.17786e-17	5.28383e-15	3.0087e-16
Reactome_E P71L	DAVID Reactome	R-HSA-2408557~Selenocysteine synthesis	720010427	Q9Y3U8, Q07020, P26373, P62917, P36578, P18124, P42766, P62266, P50914, Q02543, P39023, P62241, P40429, P62910, P83731, P62913, P46776, P62753, P62424, P05388, P46778, P61513	22	180	94	10946	9.52381	14.2324	8.35858e-20	1.5068e-18	9.26679e-16	1.72521e-16	6.17786e-17	5.28383e-15	3.0087e-16
Reactome_E P71L	DAVID Reactome	R-HSA-72764~Eukaryotic Translation Termination	720011492	Q9Y3U8, Q07020, P26373, P62917, P36578, P18124, P42766, P62266, P50914, Q02543, P39023, P62241, P40429, P62910, P83731, P62913, P46776, P62753, P62424, P05388, P46778, P61513	22	180	94	10946	9.52381	14.2324	8.35858e-20	1.5068e-18	9.26679e-16	1.72521e-16	6.17786e-17	5.28383e-15	3.0087e-16
Reactome_E P71L	DAVID Reactome	R-HSA-975956~Nonsense Mediated Decay (NMD) independent of the Exon Junction Complex (EJC)	720012258	Q9Y3U8, Q07020, P26373, P62917, P36578, P18124, P42766, P62266, P50914, Q02543, P39023, P62241, P40429, P62910, P83731, P62913, P46776, P62753, P62424, P05388, P46778, P61513	22	180	96	10946	9.52381	13.9359	1.37035e-19	2.40445e-18	1.47874e-15	1.76776e-16	9.24212e-17	7.90464e-15	4.8011e-16
Reactome_E P71L	DAVID Reactome	R-HSA-71291~Metabolism of amino acids and derivatives	720011466	Q9Y3U8, P08559, P10515, P62917, Q12904, P18124, P42766, Q02218, Q96RQ3, P50914, Q9P2J5, P41252, P39023, P62910, P40429, P47897, P83731, P00367, P62913, P62753, P54886, Q07020, P36957, P26373, P36578, P11177, Q9HCC0, P62266, Q02543, P62241, P23434, P46776, P05388, P56192, P62424, P46778, P61513	37	180	376	10946	16.0173	5.98407	4.62594e-19	3.01124e-18	1.85191e-15	1.19349e-16	1.08936e-16	9.31713e-15	6.0127e-16
Reactome_E P71L	DAVID Reactome	R-HSA-9633012~Response of EIF2AK4 (GCN2) to amino acid deficiency	720011951	Q9Y3U8, Q07020, P26373, P62917, P36578, P18124, P42766, P62266, P50914, Q02543, P39023, P62241, P40429, P62910, P83731, P62913, P46776, P62753, P62424, P05388, P46778, P61513	22	180	102	10946	9.52381	13.1161	5.62311e-19	9.13559e-18	5.61839e-15	5.80305e-16	2.95704e-16	2.52911e-14	1.82415e-15
Reactome_E P71L	DAVID Reactome	R-HSA-72689~Formation of a pool of free 40S subunits	720011486	Q9Y3U8, Q07020, P26373, P62917, P36578, P18124, P42766, P62266, P50914, Q02543, P39023, P62241, P40429, P62910, P83731, P62913, P46776, P62753, P62424, P05388, P46778, P61513	22	180	102	10946	9.52381	13.1161	5.62311e-19	9.13559e-18	5.61839e-15	5.80305e-16	2.95704e-16	2.52911e-14	1.82415e-15
Reactome_E P71L	DAVID Reactome	R-HSA-156827~L13a-mediated translational silencing of Ceruloplasmin expression	720009919	Q9Y3U8, Q07020, P26373, P62917, P36578, P18124, P42766, P62266, P50914, Q02543, P39023, P62241, P40429, P62910, P83731, P62913, P46776, P62753, P62424, P05388, P46778, P61513	22	180	112	10946	9.52381	11.945	4.80321e-18	6.94601e-17	6.82787e-14	4.95692e-15	2.1359e-15	1.8268e-13	2.22045e-14
Reactome_E P71L	DAVID Reactome	R-HSA-72706~GTP hydrolysis and joining of the 60S ribosomal subunit	720011489	Q9Y3U8, Q07020, P26373, P62917, P36578, P18124, P42766, P62266, P50914, Q02543, P39023, P62241, P40429, P62910, P83731, P62913, P46776, P62753, P62424, P05388, P46778, P61513	22	180	113	10946	9.52381	11.8393	5.87745e-18	8.40709e-17	6.82787e-14	1.2131e-14	2.46208e-15	2.10578e-13	2.22045e-14
Reactome_E P71L	DAVID Reactome	R-HSA-927802~Nonsense-Mediated Decay (NMD)	720011890	Q9Y3U8, Q07020, P26373, P62917, P36578, P18124, P42766, P62266, P50914, Q02543, P39023, P62241, P40429, P62910, P83731, P62913, P46776, P62753, P62424, P05388, P46778, P61513	22	180	116	10946	9.52381	11.5331	1.06342e-17	1.47308e-16	6.82787e-14	1.37182e-14	3.9389e-15	3.36888e-13	2.22045e-14
Reactome_E P71L	DAVID Reactome	R-HSA-975957~Nonsense Mediated Decay (NMD) enhanced by the Exon Junction Complex (EJC)	720012259	Q9Y3U8, Q07020, P26373, P62917, P36578, P18124, P42766, P62266, P50914, Q02543, P39023, P62241, P40429, P62910, P83731, P62913, P46776, P62753, P62424, P05388, P46778, P61513	22	180	116	10946	9.52381	11.5331	1.06342e-17	1.47308e-16	6.82787e-14	1.37182e-14	3.9389e-15	3.36888e-13	2.22045e-14
Reactome_E P71L	DAVID Reactome	R-HSA-5663205~Infectious disease	720011233	Q9Y3U8, Q14204, Q14643, P04439, P62917, P18124, P14314, O00468, P51149, Q9H0U3, P39023, P62910, P83731, P27824, P62913, P62753, Q14573, Q16637, Q07020, Q14697, P04843, P49411, P36578, O75694, P10321, P63096, P54709, P62241, P46776, P05388, P27797, P46977, P46778, P61513, P46734, P04899, Q8TEM1, Q12849, P12235, P42766, P50914, P61088, Q00610, P40429, P26373, Q8N1F7, P62266, Q02543, Q92621, Q5SRE5,…	52	180	960	10946	22.5108	3.29394	3.41479e-15	1.16901e-14	7.16927e-12	8.87956e-13	2.9956e-13	2.56209e-11	2.33147e-12
Reactome_E P71L	DAVID Reactome	R-HSA-392499~Metabolism of proteins	720010689	Q9Y3U8, Q14204, P04439, P18085, P62917, Q12904, P18124, P51148, P14314, P51149, Q8IXI2, Q9NWU5, Q9H0U3, O60762, P41252, Q9P2J5, P39023, P62910, P83731, Q9Y2T2, P27824, P62913, Q9NSE4, P62753, P61106, O75616, Q07020, P82914, Q14697, P04843, Q9Y673, P49411, Q9NP72, Q5JRA6, P36578, Q86VP6, O75694, Q15629, Q01082, P62241, Q6P161, Q9UI10, P46776, P05388, P27797, P46977, P46778, P61513, O43852, Q9Y287,…	77	180	1970	10946	33.3333	2.37688	6.29234e-15	1.5312e-14	9.42246e-12	1.63269e-12	3.76674e-13	3.22164e-11	3.06422e-12
Reactome_E P71L	DAVID Reactome	R-HSA-9711097~Cellular response to starvation	720012189	Q9Y3U8, Q07020, P26373, P62917, P36578, P18124, P42766, P62266, P50914, Q02543, P39023, P62241, P40429, P62910, P83731, P62913, P46776, P62753, P62424, P05388, P46778, P61513	22	180	157	10946	9.52381	8.5213	8.901e-15	8.64907e-14	5.31891e-11	4.583e-12	2.04584e-12	1.74977e-10	1.7264e-11
Reactome_E P71L	DAVID Reactome	R-HSA-8953854~Metabolism of RNA	720011712	Q9Y3U8, Q8IY81, O43592, P62917, Q8TEM1, P18124, Q9H583, Q9Y3A4, P42766, P50914, P39023, Q92973, P62910, P40429, P83731, P62913, Q99848, P62753, P56182, Q16637, Q07020, Q9UNQ2, P46087, P26373, Q13601, P36578, Q8N1F7, O75694, Q8IY37, O75691, P62266, Q9NW13, Q02543, P62241, Q92621, Q5SRE5, P46776, P05388, Q9Y3Y2, P62424, P46778, P61513	43	180	716	10946	18.6147	3.65206	4.53446e-14	1.74203e-13	1.07129e-10	1.16867e-11	3.96796e-12	3.39373e-10	3.47833e-11
Reactome_E P71L	DAVID Reactome	R-HSA-9010553~Regulation of expression of SLITs and ROBOs	720011775	Q9Y3U8, Q07020, P26373, P62917, P36578, P18124, P42766, P62266, P50914, Q02543, P39023, P62241, P40429, P62910, P83731, P62913, P46776, P62753, P62424, P05388, P46778, P61513	22	180	172	10946	9.52381	7.77817	6.17847e-14	5.41051e-13	3.32722e-10	1.59546e-11	1.18838e-11	1.0164e-09	1.08025e-10
Reactome_E P71L	DAVID Reactome	R-HSA-376176~Signaling by ROBO receptors	720010607	Q9Y3U8, Q07020, P26373, P62917, P36578, P18124, P42766, P62266, P50914, Q02543, P39023, P62241, P40429, P62910, P83731, P62913, P46776, P62753, P62424, P05388, P46778, P61513	22	180	219	10946	9.52381	6.10888	8.84718e-12	5.92352e-11	3.64296e-08	2.28256e-09	1.2562e-09	1.0744e-07	1.18278e-08
Reactome_E P71L	DAVID Reactome	R-HSA-1430728~Metabolism	720009866	Q9Y3U8, Q9Y305, O95674, Q14643, P08559, A0FGR8, O75027, P10515, P40926, P62917, Q12904, Q8IV08, P18124, O00468, Q02218, Q96RQ3, P42704, P41252, Q9P2J5, P39023, P62910, P83731, P62913, P62753, Q14573, P61106, Q07020, O95168, P04406, P36578, O75694, P11177, Q96G23, Q7LGA3, P63096, P16152, P62241, P23434, P46776, P05388, P46778, P61513, P04899, Q8TEM1, O00763, O95299, P42126, Q8NF37, P42766, P50914,…	73	180	2118	10946	31.6017	2.09594	3.10901e-11	6.68205e-11	4.10946e-08	8.02125e-09	1.36982e-09	1.17159e-07	1.33424e-08
Reactome_E P71L	DAVID Reactome	R-HSA-1643685~Disease	720009979	Q9Y3U8, Q14204, Q14643, P04439, P62917, P18124, P14314, O00468, P51149, Q96RQ3, Q9H0U3, O60762, P39023, P62910, P83731, P27824, P62913, P62753, O94905, Q14573, Q16637, Q07020, Q14697, P04843, P49411, P36578, O75694, Q01082, P10321, P84095, P63096, P54709, P62241, P46776, P05388, P27797, P46977, P46778, P61513, P46734, P04899, Q8TEM1, Q12849, P12235, P42766, P50914, P61088, Q00610, P40429, P26373,…	64	180	1748	10946	27.7056	2.22649	8.04422e-11	1.84181e-10	1.13271e-07	2.07541e-08	3.65392e-09	3.12514e-07	3.67764e-08
Reactome_E P71L	DAVID Reactome	R-HSA-2262752~Cellular responses to stress	720010418	Q9Y3U8, Q14204, P62917, Q8TEM1, P18124, P42766, Q15084, P50914, Q9UBS4, P42704, P39023, P62910, P40429, P83731, P62913, P62753, Q07020, P26373, P14625, P36578, Q8N1F7, O75694, Q9Y4L1, Q8TCT9, P62266, P20700, Q02543, P62241, Q92621, Q5SRE5, P46776, P05388, P27797, P62424, P46778, P61513, P46734	37	180	789	10946	16.0173	2.85173	4.44456e-09	1.32047e-08	8.12085e-06	1.1467e-06	2.53777e-07	2.17052e-05	2.63665e-06
Reactome_E P71L	DAVID Reactome	R-HSA-8953897~Cellular responses to stimuli	720011713	Q9Y3U8, Q14204, P62917, Q8TEM1, P18124, P42766, Q15084, P50914, Q9UBS4, P42704, P39023, P62910, P40429, P83731, P62913, P62753, Q07020, P26373, P14625, P36578, Q8N1F7, O75694, Q9Y4L1, Q8TCT9, P62266, P20700, Q02543, P62241, Q92621, Q5SRE5, P46776, P05388, P27797, P62424, P46778, P61513, P46734	37	180	803	10946	16.0173	2.80201	7.14672e-09	2.0851e-08	1.28233e-05	1.84385e-06	3.88587e-07	3.32352e-05	4.16343e-06
Reactome_E P71L	DAVID Reactome	R-HSA-9694516~SARS-CoV-2 Infection	720012126	Q16637, P04843, Q14697, P49411, P04439, Q8TEM1, Q8N1F7, O75694, P14314, O00468, P10321, P62266, Q9H0U3, P61088, P62241, Q92621, Q5SRE5, P27824, P62753, P46977	21	180	299	10946	9.09091	4.27101	1.92393e-08	8.76474e-08	5.39017e-05	9.92742e-06	1.58539e-06	0.000135596	1.7501e-05
Reactome_E P71L	DAVID Reactome	R-HSA-422475~Axon guidance	720010756	Q9Y3U8, P62917, P18124, O00468, P42766, P50914, P39023, Q00610, P62910, P40429, P83731, P62913, P62753, Q07020, P26373, P36578, Q01082, P62266, Q02543, P62241, P62745, P46776, P05388, P62424, P46778, P61513	26	180	553	10946	11.2554	2.85911	1.16675e-06	3.49186e-06	0.00214519	0.000300977	6.13569e-05	0.00524776	0.000697236
Reactome_E P71L	DAVID Reactome	R-HSA-9679506~SARS-CoV Infections	720012097	Q16637, P04843, Q14697, P49411, P04439, Q8TEM1, Q8N1F7, O75694, P14314, O00468, P10321, P62266, Q9H0U3, P54709, P61088, P62241, Q92621, Q5SRE5, P27824, P62753, P46977	22	180	414	10946	9.52381	3.23151	1.14571e-06	3.89848e-06	0.0023947	0.000295549	6.6599e-05	0.00569611	0.000778429
Reactome_E P71L	DAVID Reactome	R-HSA-9675108~Nervous system development	720012086	Q9Y3U8, P62917, P18124, O00468, P42766, P50914, P39023, Q00610, P62910, P40429, P83731, P62913, P62753, Q07020, P26373, P36578, Q01082, P62266, Q02543, P62241, P62745, P46776, P05388, P62424, P46778, P61513	26	180	578	10946	11.2554	2.73545	2.6549e-06	7.59425e-06	0.00465959	0.00068473	0.000126229	0.0107961	0.00151638
Reactome_E P71L	DAVID Reactome	R-HSA-70326~Glucose metabolism	720011454	P04406, P40926, Q8TEM1, Q92621, Q5SRE5, P04075, Q8N1F7, O75694, P19367, Q01813	10	180	91	10946	4.329	6.68254	2.2889e-06	1.69422e-05	0.0103654	0.00353695	0.000274196	0.0234515	0.0033829
Reactome_E P71L	DAVID Reactome	R-HSA-70171~Glycolysis	720011450	P04406, Q8TEM1, Q92621, Q5SRE5, P04075, Q8N1F7, O75694, P19367, Q01813	9	180	71	10946	3.8961	7.70845	2.23125e-06	1.93309e-05	0.0118182	0.0023	0.000304834	0.0260719	0.00385987
Reactome_E P71L	DAVID Reactome	R-HSA-196780~Biotin transport and metabolism	720010246	Q96RQ3, P05165, O00763, P05166, Q9HCC0	5	180	11	10946	2.1645	27.6414	4.85126e-07	2.0864e-05	0.0127495	0.00735739	0.000320783	0.0274361	0.00416597
Reactome_E P71L	DAVID Reactome	R-HSA-9705683~SARS-CoV-2-host interactions	720012173	Q16637, P49411, P04439, Q8TEM1, Q8N1F7, O75694, P10321, P62266, P61088, P62241, Q92621, Q5SRE5, P62753	14	180	203	10946	6.06061	4.19387	6.22498e-06	2.79941e-05	0.0170692	0.00160476	0.000419911	0.0359143	0.00558964
Reactome_E P71L	DAVID Reactome	R-HSA-446203~Asparagine N-linked glycosylation	720010831	Q14204, P04843, Q14697, Q9Y673, P18085, Q5JRA6, Q01082, P30101, O75396, P14314, O75352, Q9H0U3, O60762, P27824, P27797, P46977, Q14165	17	180	304	10946	7.35931	3.40062	1.0517e-05	3.78643e-05	0.0230179	0.00270973	0.000554441	0.0474205	0.00756042
Reactome_E P71L	DAVID Reactome	R-HSA-6790901~rRNA modification in the nucleus and cytosol	720011339	Q9Y3A4, Q9UNQ2, P46087, Q13601, Q8IY37, P62753, Q9H583, O75691	8	180	61	10946	3.4632	7.97523	6.40713e-06	5.76251e-05	0.0348198	0.0147673	0.000824173	0.0704903	0.011506
Reactome_E P71L	DAVID Reactome	R-HSA-6798695~Neutrophil degranulation	720011351	Q96CS3, P50395, Q14204, Q5T4S7, Q9NP72, P04439, Q86VP6, P51148, P10321, P51149, P84095, Q8NF37, Q9NZT1, Q9H0U3, Q8NBS9, Q5T9A4, Q7Z6Z7, P04075, P20340, P61106, Q14165	21	180	482	10946	9.09091	2.64945	4.23624e-05	0.00011776	0.0698662	0.0108702	0.00164597	0.140777	0.0235125
Reactome_E P71L	DAVID Reactome	R-HSA-389661~Glyoxylate metabolism and glycine degradation	720010660	Q02218, P08559, P36957, P10515, P23434, P11177	6	180	31	10946	2.5974	11.7699	9.51761e-06	0.000133072	0.0785852	0.0641499	0.00181866	0.155547	0.0265695
Reactome_E P71L	DAVID Reactome	R-HSA-3371599~Defective HLCS causes multiple carboxylase deficiency	720010558	Q96RQ3, P05165, P05166, Q9HCC0	4	180	7	10946	1.7316	34.7492	2.38197e-06	0.00014342	0.0844309	0.0367936	0.00191746	0.163997	0.0286353
Reactome_E P71L	DAVID Reactome	R-HSA-194441~Metabolism of non-coding RNA	720010233	Q16637, Q8TEM1, Q92621, Q5SRE5, Q8N1F7, O75694	7	180	53	10946	3.0303	8.03166	2.35591e-05	0.000213395	0.123003	0.0299344	0.00273413	0.233846	0.0426052
Reactome_E P71L	DAVID Reactome	R-HSA-191859~snRNP Assembly	720010206	Q16637, Q8TEM1, Q92621, Q5SRE5, Q8N1F7, O75694	7	180	53	10946	3.0303	8.03166	2.35591e-05	0.000213395	0.123003	0.0299344	0.00273413	0.233846	0.0426052
Reactome_E P71L	DAVID Reactome	R-HSA-3323169~Defects in biotin (Btn) metabolism	720010537	Q96RQ3, P05165, P05166, Q9HCC0	4	180	8	10946	1.7316	30.4056	4.70273e-06	0.000226712	0.130158	0.0803096	0.00284546	0.243368	0.0452636
Reactome_E P71L	DAVID Reactome	R-HSA-532668~N-glycan trimming in the ER and Calnexin/Calreticulin cycle	720010950	Q14697, P27824, P14314, P30101, P27797, Q14165	6	180	35	10946	2.5974	10.4248	1.98673e-05	0.00024115	0.137849	0.064464	0.00296615	0.25369	0.0481459
Reactome_E P71L	DAVID Reactome	R-HSA-71406~Pyruvate metabolism and Citric Acid (TCA) cycle	720011471	P21912, Q02218, P08559, P36957, P10515, P40926, P11177	7	180	55	10946	3.0303	7.7396	3.0169e-05	0.000262288	0.148987	0.103245	0.00316289	0.270517	0.0523656
Reactome_E P71L	DAVID Reactome	R-HSA-176033~Interactions of Vpr with host cellular proteins	720010112	Q8TEM1, Q92621, Q5SRE5, Q8N1F7, O75694, P12235	6	180	36	10946	2.5974	10.1352	2.35179e-05	0.00027637	0.156328	0.0869961	0.0032686	0.279559	0.0551766
Reactome_E P71L	DAVID Reactome	R-HSA-9694548~Maturation of spike protein	720012127	P04843, Q14697, Q9H0U3, P27824, P14314, P46977	6	180	37	10946	2.5974	9.86126	2.76896e-05	0.00031536	0.176323	0.114363	0.00365937	0.31298	0.0629597
Reactome_E P71L	DAVID Reactome	R-HSA-379716~Cytosolic tRNA aminoacylation	720010616	P41252, Q9P2J5, P47897, Q12904, P56192	5	180	24	10946	2.1645	12.669	3.75121e-05	0.000568855	0.295273	0.244723	0.0064424	0.551008	0.113554
Reactome_E P71L	DAVID Reactome	R-HSA-379724~tRNA Aminoacylation	720010617	P41252, Q9P2J5, P47897, Q12904, Q9NSE4, P56192	6	180	42	10946	2.5974	8.6873	5.83656e-05	0.000576149	0.298429	0.190082	0.0064424	0.551008	0.11501
Reactome_E P71L	DAVID Reactome	R-HSA-1428517~The citric acid (TCA) cycle and respiratory electron transport	720009865	P21912, O95168, Q02218, P08559, P36957, P42704, P10515, P40926, Q12931, P11177, O95299	11	180	178	10946	4.7619	3.75799	0.000169136	0.000678413	0.34122	0.0427021	0.00745043	0.637224	0.135417
Reactome_E P71L	DAVID Reactome	R-HSA-901042~Calnexin/calreticulin cycle	720011774	Q14697, P27824, P14314, P30101, P27797	5	180	26	10946	2.1645	11.6944	5.65266e-05	0.000780187	0.381218	0.196489	0.00841781	0.719962	0.155724
Reactome_E P71L	DAVID Reactome	R-HSA-9615933~Postmitotic nuclear pore complex (NPC) reformation	720011927	Q92973, Q92621, Q5SRE5, Q8N1F7, O75694	5	180	27	10946	2.1645	11.2613	6.8455e-05	0.000904278	0.426721	0.33384	0.00958847	0.820087	0.180481
Reactome_E P71L	DAVID Reactome	R-HSA-983170~Antigen Presentation: Folding, assembly and peptide loading of class I MHC	720012287	P04439, P27824, P30101, P27797, P10321	5	180	29	10946	2.1645	10.4847	9.80509e-05	0.00119303	0.520086	0.455104	0.0124358	1.06361	0.238076
Reactome_E P71L	DAVID Reactome	R-HSA-168333~NEP/NS2 Interacts with the Cellular Export Machinery	720010064	Q8TEM1, Q92621, Q5SRE5, Q8N1F7, O75694	5	180	31	10946	2.1645	9.80824	0.000136602	0.00154081	0.612613	0.613892	0.0148295	1.26835	0.307426
Reactome_E P71L	DAVID Reactome	R-HSA-168271~Transport of Ribonucleoproteins into the Host Nucleus	720010049	Q8TEM1, Q92621, Q5SRE5, Q8N1F7, O75694	5	180	31	10946	2.1645	9.80824	0.000136602	0.00154081	0.612613	0.613892	0.0148295	1.26835	0.307426
Reactome_E P71L	DAVID Reactome	R-HSA-5619107~Defective TPR may confer susceptibility towards thyroid papillary carcinoma (TPC)	720011118	Q8TEM1, Q92621, Q5SRE5, Q8N1F7, O75694	5	180	31	10946	2.1645	9.80824	0.000136602	0.00154081	0.612613	0.613892	0.0148295	1.26835	0.307426
Reactome_E P71L	DAVID Reactome	R-HSA-170822~Regulation of Glucokinase by Glucokinase Regulatory Protein	720010080	Q8TEM1, Q92621, Q5SRE5, Q8N1F7, O75694	5	180	31	10946	2.1645	9.80824	0.000136602	0.00154081	0.612613	0.613892	0.0148295	1.26835	0.307426
Reactome_E P71L	DAVID Reactome	R-HSA-2980766~Nuclear Envelope Breakdown	720010486	P20700, Q8TEM1, Q92621, Q5SRE5, Q8N1F7, O75694	6	180	52	10946	2.5974	7.01667	0.000197709	0.00154324	0.613191	0.534764	0.0148295	1.26835	0.307909
Reactome_E P71L	DAVID Reactome	R-HSA-180746~Nuclear import of Rev protein	720010140	Q8TEM1, Q92621, Q5SRE5, Q8N1F7, O75694	5	180	33	10946	2.1645	9.2138	0.0001858	0.00195354	0.699589	0.683547	0.0179318	1.53368	0.389695
Reactome_E P71L	DAVID Reactome	R-HSA-168274~Export of Viral Ribonucleoproteins from Nucleus	720010051	Q8TEM1, Q92621, Q5SRE5, Q8N1F7, O75694	5	180	33	10946	2.1645	9.2138	0.0001858	0.00195354	0.699589	0.683547	0.0179318	1.53368	0.389695
Reactome_E P71L	DAVID Reactome	R-HSA-180910~Vpr-mediated nuclear import of PICs	720010143	Q8TEM1, Q92621, Q5SRE5, Q8N1F7, O75694	5	180	33	10946	2.1645	9.2138	0.0001858	0.00195354	0.699589	0.683547	0.0179318	1.53368	0.389695
Reactome_E P71L	DAVID Reactome	R-HSA-165054~Rev-mediated nuclear export of HIV RNA	720009990	Q8TEM1, Q92621, Q5SRE5, Q8N1F7, O75694	5	180	34	10946	2.1645	8.94281	0.000214957	0.00218609	0.739699	0.610505	0.0192064	1.64269	0.436033
Reactome_E P71L	DAVID Reactome	R-HSA-159227~Transport of the SLBP independent Mature mRNA	720009927	Q8TEM1, Q92621, Q5SRE5, Q8N1F7, O75694	5	180	34	10946	2.1645	8.94281	0.000214957	0.00218609	0.739699	0.610505	0.0192064	1.64269	0.436033
Reactome_E P71L	DAVID Reactome	R-HSA-4085377~SUMOylation of SUMOylation proteins	720010718	Q8TEM1, Q92621, Q5SRE5, Q8N1F7, O75694	5	180	34	10946	2.1645	8.94281	0.000214957	0.00218609	0.739699	0.610505	0.0192064	1.64269	0.436033
Reactome_E P71L	DAVID Reactome	R-HSA-6784531~tRNA processing in the nucleus	720011332	O43592, Q8TEM1, Q92621, Q5SRE5, Q8N1F7, O75694	6	180	57	10946	2.5974	6.40117	0.000329284	0.00232839	0.761557	0.534537	0.0198883	1.70101	0.464382
Reactome_E P71L	DAVID Reactome	R-HSA-9694635~Translation of Structural Proteins	720012131	P04843, Q14697, Q9H0U3, P27824, P14314, P46977	6	180	57	10946	2.5974	6.40117	0.000329284	0.00232839	0.761557	0.534537	0.0198883	1.70101	0.464382
Reactome_E P71L	DAVID Reactome	R-HSA-3301854~Nuclear Pore Complex (NPC) Disassembly	720010529	Q8TEM1, Q92621, Q5SRE5, Q8N1F7, O75694	5	180	35	10946	2.1645	8.6873	0.000247472	0.00243705	0.777007	0.564005	0.0202539	1.73228	0.486028
Reactome_E P71L	DAVID Reactome	R-HSA-159230~Transport of the SLBP Dependant Mature mRNA	720009928	Q8TEM1, Q92621, Q5SRE5, Q8N1F7, O75694	5	180	35	10946	2.1645	8.6873	0.000247472	0.00243705	0.777007	0.564005	0.0202539	1.73228	0.486028
Reactome_E P71L	DAVID Reactome	R-HSA-9683686~Maturation of spike protein	720012110	Q14697, P27824, P14314	3	180	5	10946	1.2987	36.4867	4.26875e-05	0.00257452	0.795128	0.632943	0.0211111	1.8056	0.513408
Reactome_E P71L	DAVID Reactome	R-HSA-177243~Interactions of Rev with host cellular proteins	720010125	Q8TEM1, Q92621, Q5SRE5, Q8N1F7, O75694	5	180	36	10946	2.1645	8.44599	0.000283594	0.00270713	0.811215	0.666351	0.0219064	1.87362	0.539819
Reactome_E P71L	DAVID Reactome	R-HSA-597592~Post-translational protein modification	720011312	Q14204, O43852, P04439, P18085, Q8TEM1, P78527, P51148, P14314, P30101, P51149, Q8IXI2, Q9H0U3, Q15084, O60762, P61088, P27824, Q93008, P61106, Q14697, P04843, Q9Y673, Q9NP72, Q5JRA6, P14625, Q86VP6, Q8N1F7, O75694, Q01082, O75396, O75352, Q86UP2, Q15293, Q92621, Q5SRE5, P20340, P27797, P46977, Q14165	38	180	1441	10946	16.4502	1.60362	0.00191108	0.00318198	0.859147	0.389532	0.0254145	2.17367	0.634356
Reactome_E P71L	DAVID Reactome	R-HSA-3232142~SUMOylation of ubiquitinylation proteins	720010516	Q8TEM1, Q92621, Q5SRE5, Q8N1F7, O75694	5	180	38	10946	2.1645	8.00146	0.000367692	0.00330748	0.869642	0.80071	0.0260782	2.23043	0.659333
Reactome_E P71L	DAVID Reactome	R-HSA-168276~NS1 Mediated Effects on Host Pathways	720010053	Q8TEM1, Q92621, Q5SRE5, Q8N1F7, O75694	5	180	40	10946	2.1645	7.60139	0.000469391	0.00399261	0.914597	0.736169	0.0310817	2.65837	0.79564
Reactome_E P71L	DAVID Reactome	R-HSA-159231~Transport of Mature mRNA Derived from an Intronless Transcript	720009929	Q8TEM1, Q92621, Q5SRE5, Q8N1F7, O75694	5	180	41	10946	2.1645	7.41599	0.000527541	0.00436865	0.932296	0.82964	0.033584	2.87239	0.870412
Reactome_E P71L	DAVID Reactome	R-HSA-9705671~SARS-CoV-2 activates/modulates innate and adaptive immune responses	720012171	P04439, P61088, Q8TEM1, Q92621, Q5SRE5, Q8N1F7, O75694, P10321	8	180	126	10946	3.4632	3.86102	0.00110458	0.00459246	0.941039	0.434631	0.0348687	2.98227	0.914903
Reactome_E P71L	DAVID Reactome	R-HSA-159234~Transport of Mature mRNAs Derived from Intronless Transcripts	720009930	Q8TEM1, Q92621, Q5SRE5, Q8N1F7, O75694	5	180	42	10946	2.1645	7.23942	0.000590943	0.00476786	0.947094	0.881769	0.035759	3.05841	0.949762
Reactome_E P71L	DAVID Reactome	R-HSA-168325~Viral Messenger RNA Synthesis	720010062	Q8TEM1, Q92621, Q5SRE5, Q8N1F7, O75694	5	180	43	10946	2.1645	7.07106	0.000659894	0.00519088	0.959267	0.972026	0.0381172	3.2601	1.03381
Reactome_E P71L	DAVID Reactome	R-HSA-71403~Citric acid cycle (TCA cycle)	720011470	P21912, Q02218, P36957, P40926	4	180	22	10946	1.7316	11.0566	0.000410315	0.00526823	0.961169	0.962461	0.0381172	3.2601	1.04917
Reactome_E P71L	DAVID Reactome	R-HSA-3296482~Defects in vitamin and cofactor metabolism	720010527	Q96RQ3, P05165, P05166, Q9HCC0	4	180	22	10946	1.7316	11.0566	0.000410315	0.00526823	0.961169	0.962461	0.0381172	3.2601	1.04917
Reactome_E P71L	DAVID Reactome	R-HSA-9772573~Late SARS-CoV-2 Infection Events	720012271	P04843, Q14697, Q9H0U3, P27824, P14314, P46977	6	180	70	10946	2.5974	5.21238	0.000997697	0.00567818	0.969864	0.786732	0.0406056	3.47294	1.13058
Reactome_E P71L	DAVID Reactome	R-HSA-4615885~SUMOylation of DNA replication proteins	720010877	Q8TEM1, Q92621, Q5SRE5, Q8N1F7, O75694	5	180	45	10946	2.1645	6.75679	0.00081566	0.0061108	0.97694	0.814409	0.0431971	3.69458	1.21646
Reactome_E P71L	DAVID Reactome	R-HSA-1169408~ISG15 antiviral mechanism	720009777	P61088, Q8TEM1, Q92621, Q5SRE5, Q8N1F7, O75694	6	180	72	10946	2.5974	5.06759	0.00115716	0.00639525	0.980662	0.775437	0.0446941	3.82261	1.2729
Reactome_E P71L	DAVID Reactome	R-HSA-4570464~SUMOylation of RNA binding proteins	720010874	Q8TEM1, Q92621, Q5SRE5, Q8N1F7, O75694	5	180	47	10946	2.1645	6.46927	0.000997319	0.0071332	0.987755	0.997318	0.0492912	4.2158	1.41926
Reactome_E WT	DAVID Reactome	R-HSA-5653656~Vesicle-mediated transport	720011168	Q13439, P18085, Q14789, P51148, P51149, P51809, P62330, Q9H0U4, P63261, Q00610, P61006, P49755, O15498, P61923, P63027, P11717, P53992, Q9UIQ6, Q9Y678, Q15643, P49257, O75976, Q9NP72, Q9H3P7, Q15907, P14625, Q01082, P68371, O75396, Q9Y4L1, Q8IWJ2, P54920, O00159, P68366, P04350, P62820, P27797	37	171	673	10946	17.9612	3.51922	1.04194e-11	3.8442e-11	2.71016e-08	2.68822e-09	2.71016e-08	2.2873e-06	7.67751e-09
Reactome_E WT	DAVID Reactome	R-HSA-446203~Asparagine N-linked glycosylation	720010831	P53992, Q9Y678, Q14697, P49257, P18085, Q14789, Q01082, Q06210, P30101, P68371, O75396, P14314, O75352, P54920, Q9H0U4, P68366, P49755, P04350, O15498, P27824, P61923, P62820, P27797, Q14165	24	171	304	10946	11.6505	5.05355	5.25669e-11	2.85273e-10	2.01117e-07	1.35622e-08	1.00559e-07	8.48686e-06	5.69737e-08
Reactome_E WT	DAVID Reactome	R-HSA-199991~Membrane Trafficking	720010272	Q13439, P18085, Q14789, P51148, P51149, P51809, P62330, Q9H0U4, P63261, Q00610, P61006, P49755, O15498, P61923, P63027, P11717, P53992, Q9UIQ6, Q9Y678, Q15643, P49257, O75976, Q9NP72, Q9H3P7, Q15907, Q01082, P68371, O75396, Q8IWJ2, P54920, O00159, P68366, P04350, P62820	34	171	634	10946	16.5049	3.4328	1.64749e-10	5.92684e-10	4.17842e-07	4.25053e-08	1.39281e-07	1.17549e-05	1.18369e-07
Reactome_E WT	DAVID Reactome	R-HSA-199977~ER to Golgi Anterograde Transport	720010271	P53992, Q9Y678, P49257, P18085, Q14789, Q01082, P68371, O75396, P54920, Q9H0U4, P68366, P49755, P04350, O15498, P61923, P62820	16	171	154	10946	7.76699	6.65057	2.04821e-09	1.50246e-08	1.05923e-05	1.58531e-06	2.52375e-06	0.000212997	3.00066e-06
Reactome_E WT	DAVID Reactome	R-HSA-392499~Metabolism of proteins	720010689	P04439, P18085, Q12904, P51148, P14314, P51149, Q9H0U4, Q6PI48, Q9P2J5, P41250, P62910, P61586, P27824, Q9NSE4, Q14697, Q9Y678, P49257, P49411, Q9NP72, Q15907, Q86VP6, O75694, Q01082, Q06210, P43307, Q9UI10, P27797, P46778, Q9Y287, Q14789, Q8TEM1, P78527, P30101, Q15084, P61088, P61006, P49755, P47897, O15498, P61923, P63027, Q93008, Q14232, Q8NFH5, Q9Y2Z4, P43897, P53992, P60604, P14625, Q8N1F7,…	62	171	1970	10946	30.0971	2.01458	8.66344e-09	1.78989e-08	1.26187e-05	2.23516e-06	2.52375e-06	0.000212997	3.57471e-06
Reactome_E WT	DAVID Reactome	R-HSA-6807878~COPI-mediated anterograde transport	720011388	Q9Y678, P18085, Q14789, Q01082, P68371, P54920, Q9H0U4, P68366, P49755, P04350, O15498, P61923, P62820	13	171	101	10946	6.31068	8.23913	5.17319e-09	4.80463e-08	3.38721e-05	2.66936e-06	5.64544e-06	0.000476459	9.59564e-06
Reactome_E WT	DAVID Reactome	R-HSA-6811442~Intra-Golgi and retrograde Golgi-to-ER traffic	720011395	P11717, Q9Y678, Q15643, Q13439, Q9NP72, P18085, P68371, Q8IWJ2, O75396, P54920, Q9H0U4, P68366, P49755, P04350, O15498, P61923, P62820	17	171	202	10946	8.25243	5.38712	1.57703e-08	9.18002e-08	6.47171e-05	4.06874e-06	9.2456e-06	0.000780302	1.8334e-05
Reactome_E WT	DAVID Reactome	R-HSA-1428517~The citric acid (TCA) cycle and respiratory electron transport	720009865	P30049, O75947, P31930, O75306, P08559, O75964, P10515, Q12931, P11177, P21912, P42704, P31040, P22695, P47985, P21796, P06576	16	171	178	10946	7.76699	5.75386	1.68481e-08	1.05311e-07	7.42412e-05	4.34681e-06	9.2805e-06	0.000783248	2.10323e-05
Reactome_E WT	DAVID Reactome	R-HSA-948021~Transport to the Golgi and subsequent modification	720011903	P53992, Q9Y678, P49257, P18085, Q14789, Q01082, P68371, O75396, P54920, Q9H0U4, P68366, P49755, P04350, O15498, P61923, P62820	16	171	185	10946	7.76699	5.53615	2.91783e-08	1.75129e-07	0.000123458	2.25837e-05	1.37184e-05	0.0011578	3.49762e-05
Reactome_E WT	DAVID Reactome	R-HSA-432722~Golgi Associated Vesicle Biogenesis	720010796	P11717, P51809, O75976, Q14789, Q9H3P7, Q00610, P51148, P63027, P54920	9	171	56	10946	4.36893	10.2876	1.81126e-07	2.16184e-06	0.00152294	0.000420487	0.000132738	0.0112027	0.000431755
Reactome_E WT	DAVID Reactome	R-HSA-2995410~Nuclear Envelope (NE) Reassembly	720010490	P20700, P68366, Q92973, Q92621, Q8N1F7, P04350, O75694, P02545, P68371, Q8NFH5	10	171	75	10946	4.85437	8.53489	2.2978e-07	2.21851e-06	0.00156283	0.000237105	0.000132738	0.0112027	0.000443074
Reactome_E WT	DAVID Reactome	R-HSA-597592~Post-translational protein modification	720011312	P04439, P18085, Q14789, Q8TEM1, P78527, P51148, P14314, P30101, P51149, Q9H0U4, Q15084, P61088, P61006, P49755, O15498, P61586, P27824, P61923, Q93008, Q8NFH5, P53992, Q14697, P60604, Q9Y678, P49257, Q9NP72, Q15907, P14625, Q86VP6, Q8N1F7, O75694, Q01082, Q06210, P68371, O75396, O75352, P54920, Q86UP2, Q15293, P68366, Q92621, P04350, P62820, P27797, P21796, Q14165	46	171	1441	10946	22.3301	2.0434	1.07315e-06	2.25938e-06	0.0015916	0.000276835	0.000132738	0.0112027	0.000451235
Reactome_E WT	DAVID Reactome	R-HSA-6811434~COPI-dependent Golgi-to-ER retrograde traffic	720011391	Q9H0U4, Q9Y678, P18085, P68366, P49755, P04350, P61923, O75396, P68371, P62820, P54920	11	171	99	10946	5.33981	7.11241	3.76313e-07	2.9675e-06	0.00208991	0.000388279	0.00016093	0.013582	0.000592659
Reactome_E WT	DAVID Reactome	R-HSA-163200~Respiratory electron transport, ATP synthesis by chemiosmotic coupling, and heat production by uncoupling proteins.	720009961	P30049, P21912, P31930, O75947, O75306, O75964, P42704, Q12931, P31040, P22695, P47985, P06576	12	171	127	10946	5.82524	6.04835	6.51064e-07	4.30263e-06	0.00302876	0.00016796	0.000216668	0.0182862	0.000859304
Reactome_E WT	DAVID Reactome	R-HSA-9012999~RHO GTPase cycle	720011779	O15173, Q96CS3, P05556, O75955, P49257, O75976, P12814, Q01082, Q03135, Q08378, P51149, P34897, Q86UP2, Q9P0I2, P20700, P63261, Q9HD26, Q8NHP6, Q00610, O15498, P61586, Q93008	22	171	449	10946	10.6796	3.13643	1.83781e-06	6.05259e-06	0.004258	0.000474043	0.000279321	0.0235739	0.0012088
Reactome_E WT	DAVID Reactome	R-HSA-1643685~Disease	720009979	Q13439, P04439, P14314, P51149, P21964, Q96RQ3, P62910, Q8WUM4, P27824, P62633, O94905, Q14697, P49411, O75694, Q01082, Q06210, Q8IWJ2, O00159, P05023, P27797, P46778, P46734, P04899, Q14789, Q8TEM1, Q12849, Q03135, P12235, P63261, P61088, Q00610, P02545, P63027, Q8NFH5, P05556, P53992, Q15643, O75477, Q8N1F7, Q86YT6, P19367, O00410, P68371, O75352, Q9HCC0, P20700, P68366, Q92621, P04350, P05165,…	51	171	1748	10946	24.7573	1.86762	3.45132e-06	6.62637e-06	0.00466071	0.000890045	0.000279321	0.0235739	0.00132339
Reactome_E WT	DAVID Reactome	R-HSA-8856688~Golgi-to-ER retrograde transport	720011624	Q9H0U4, Q9Y678, Q9NP72, P18085, P68366, P49755, P04350, P61923, O75396, P68371, P62820, P54920	12	171	133	10946	5.82524	5.77549	1.07112e-06	6.73539e-06	0.00473721	0.00027631	0.000279321	0.0235739	0.00134517
Reactome_E WT	DAVID Reactome	R-HSA-5663205~Infectious disease	720011233	P04899, P04439, Q8TEM1, Q12849, Q03135, P14314, P12235, P51149, P21964, P63261, P61088, Q00610, P62910, Q8WUM4, P27824, P63027, P62633, Q8NFH5, P05556, P53992, Q14697, P49411, Q8N1F7, O75694, O00410, P68371, O00159, P68366, Q92621, P04350, P05023, P27797, P46778, P46734	34	171	960	10946	16.5049	2.26708	4.31562e-06	1.01421e-05	0.0071247	0.00111281	0.000397232	0.0335252	0.00202553
Reactome_E WT	DAVID Reactome	R-HSA-199992~trans-Golgi Network Vesicle Budding	720010273	P11717, P51809, O75976, Q14789, Q9H3P7, Q00610, P51148, P63027, P54920	9	171	72	10946	4.36893	8.00146	1.64287e-06	1.4752e-05	0.0103464	0.00211706	0.000547377	0.0461971	0.0029462
Reactome_E WT	DAVID Reactome	R-HSA-196780~Biotin transport and metabolism	720010246	Q96RQ3, P05165, O00763, P05166, Q9HCC0	5	171	11	10946	2.42718	29.0962	3.75826e-07	1.70223e-05	0.0119291	0.00570449	0.000600037	0.0506414	0.00339961
Reactome_E WT	DAVID Reactome	R-HSA-168255~Influenza Infection	720010045	Q00610, P62910, Q8TEM1, Q92621, Q12849, Q8N1F7, O75694, P27824, O00410, Q8NFH5, P27797, P46778	12	171	157	10946	5.82524	4.89261	6.14378e-06	3.25109e-05	0.0226599	0.00316518	0.00109144	0.0921142	0.00649286
Reactome_E WT	DAVID Reactome	R-HSA-379724~tRNA Aminoacylation	720010617	Q6PI48, Q9P2J5, P41250, P47897, Q12904, Q9NSE4, Q9Y2Z4	7	171	42	10946	3.39806	10.6686	3.41788e-06	4.23978e-05	0.0294488	0.0122695	0.00135866	0.114667	0.00846738
Reactome_E WT	DAVID Reactome	R-HSA-1430728~Metabolism	720009866	P30049, P31930, O75947, O75306, P08559, P10515, Q12904, Q8IV08, P12694, P21964, Q96RQ3, P42704, Q9P2J5, P62910, P22695, P00387, P04406, O75694, P11177, P16152, P47985, P46778, Q99714, P36969, O75964, P04899, Q8TEM1, Q03135, O00763, Q53GQ0, Q8NF37, P31040, P47897, P49753, P63027, Q8NFH5, P54886, Q9NXE4, P53992, Q9NVE7, P43490, Q12931, Q8N1F7, P19367, Q9HCC0, P34897, P21912, P17858, Q92621, P05165,…	55	171	2118	10946	26.699	1.66225	4.16042e-05	7.10175e-05	0.0488363	0.0106767	0.00217684	0.183719	0.0141829
Reactome_E WT	DAVID Reactome	R-HSA-204005~COPII-mediated vesicle transport	720010313	P53992, Q9H0U4, P49257, P49755, O15498, O75396, P62820, P54920	8	171	68	10946	3.8835	7.53079	1.00258e-05	8.41695e-05	0.0576156	0.025535	0.00247248	0.20867	0.0168093
Reactome_E WT	DAVID Reactome	R-HSA-8949613~Cristae formation	720011702	P30049, O75947, O75964, O75431, Q16891, P06576	6	171	31	10946	2.91262	12.3894	7.08983e-06	0.00010436	0.0709358	0.0481882	0.00294294	0.248376	0.0208413
Reactome_E WT	DAVID Reactome	R-HSA-70171~Glycolysis	720011450	P17858, P04406, Q8TEM1, Q92621, Q8N1F7, O75694, P19367, Q8NFH5	8	171	71	10946	3.8835	7.21259	1.38674e-05	0.000111047	0.0753058	0.0142093	0.00301107	0.254126	0.0221766
Reactome_E WT	DAVID Reactome	R-HSA-1445148~Translocation of SLC2A4 (GLUT4) to the plasma membrane	720009871	Q9UIQ6, P63261, P68366, P61006, P04350, P63027, P68371, O00159	8	171	72	10946	3.8835	7.11241	1.53954e-05	0.000121417	0.0820424	0.0196643	0.00309828	0.261486	0.0242475
Reactome_E WT	DAVID Reactome	R-HSA-3371599~Defective HLCS causes multiple carboxylase deficiency	720010558	Q96RQ3, P05165, P05166, Q9HCC0	4	171	7	10946	1.94175	36.5781	1.94056e-06	0.000123052	0.0831002	0.0300789	0.00309828	0.261486	0.024574
Reactome_E WT	DAVID Reactome	R-HSA-9013408~RHOG GTPase cycle	720011788	O15173, P05556, P49257, O15498, Q03135, P51149, Q86UP2, P34897	8	171	74	10946	3.8835	6.92018	1.88791e-05	0.000144519	0.0968743	0.0428907	0.00340138	0.287067	0.0288609
Reactome_E WT	DAVID Reactome	R-HSA-2980766~Nuclear Envelope Breakdown	720010486	P20700, Q8TEM1, Q92621, Q8N1F7, O75694, P02545, Q8NFH5	7	171	52	10946	3.39806	8.61696	1.48635e-05	0.00014474	0.0970145	0.0558991	0.00340138	0.287067	0.0289048
Reactome_E WT	DAVID Reactome	R-HSA-9013405~RHOD GTPase cycle	720011785	O15173, P20700, P49257, Q8NHP6, P12814, Q03135, P51149	7	171	54	10946	3.39806	8.29781	1.91664e-05	0.000178976	0.118552	0.0529419	0.00407026	0.343519	0.0357413
Reactome_E WT	DAVID Reactome	R-HSA-532668~N-glycan trimming in the ER and Calnexin/Calreticulin cycle	720010950	Q14697, P27824, P14314, P30101, P27797, Q14165	6	171	35	10946	2.91262	10.9734	1.48413e-05	0.000189633	0.125151	0.0485595	0.00415814	0.350935	0.0378694
Reactome_E WT	DAVID Reactome	R-HSA-3323169~Defects in biotin (Btn) metabolism	720010537	Q96RQ3, P05165, P05166, Q9HCC0	4	171	8	10946	1.94175	32.0058	3.83379e-06	0.000194636	0.128232	0.0659724	0.00415814	0.350935	0.0388683
Reactome_E WT	DAVID Reactome	R-HSA-176033~Interactions of Vpr with host cellular proteins	720010112	Q8TEM1, Q92621, Q8N1F7, O75694, P12235, Q8NFH5	6	171	36	10946	2.91262	10.6686	1.75807e-05	0.000217477	0.14216	0.0657749	0.00449233	0.37914	0.043429
Reactome_E WT	DAVID Reactome	R-HSA-9609507~Protein localization	720011913	P46379, P49753, O75431, P11441, P63027, P12235, P21796, Q93008, Q9HAV7, Q13011, P06576	11	171	163	10946	5.33981	4.31981	4.82947e-05	0.000223024	0.145509	0.0246127	0.00449233	0.37914	0.0445366
Reactome_E WT	DAVID Reactome	R-HSA-194315~Signaling by Rho GTPases	720010232	P12814, Q03135, P51149, P63261, Q8NHP6, Q00610, O15498, P61586, Q93008, Q96CS3, O15173, P05556, O75955, P49257, O75976, Q01082, Q08378, P68371, P34897, Q86UP2, Q9P0I2, P20700, Q9HD26, P68366, P04350	25	171	707	10946	12.1359	2.2635	9.9161e-05	0.000234117	0.152167	0.0252603	0.00458479	0.386944	0.0467516
Reactome_E WT	DAVID Reactome	R-HSA-379726~Mitochondrial tRNA aminoacylation	720010618	Q6PI48, P41250, P47897, Q9NSE4, Q9Y2Z4	5	171	21	10946	2.42718	15.2409	1.45814e-05	0.000273407	0.175335	0.0999786	0.00520952	0.439668	0.0545966
Reactome_E WT	DAVID Reactome	R-HSA-9716542~Signaling by Rho GTPases, Miro GTPases and RHOBTB3	720012192	P12814, Q03135, P51149, P63261, Q8NHP6, Q00610, O15498, P61586, Q93008, Q96CS3, O15173, P05556, O75955, P49257, O75976, Q01082, Q08378, P68371, P34897, Q86UP2, Q9P0I2, P20700, Q9HD26, P68366, P04350	25	171	723	10946	12.1359	2.21341	0.000141198	0.000326007	0.205365	0.035776	0.00604828	0.510458	0.0650984
Reactome_E WT	DAVID Reactome	R-HSA-68875~Mitotic Prophase	720011403	Q9H0U4, P20700, Q8TEM1, Q92621, Q9H8Y8, Q8N1F7, O75694, P02545, P62820, Q8NFH5	10	171	142	10946	4.85437	4.50787	7.4941e-05	0.000363242	0.22596	0.0744267	0.0065663	0.554177	0.0725324
Reactome_E WT	DAVID Reactome	R-HSA-8873719~RAB geranylgeranylation	720011646	Q9H0U4, Q9NP72, P61006, Q15907, P51148, P62820, P51149	7	171	65	10946	3.39806	6.89357	6.52295e-05	0.000497289	0.295788	0.0960476	0.00876472	0.739718	0.0992923
Reactome_E WT	DAVID Reactome	R-HSA-70326~Glucose metabolism	720011454	P17858, P04406, Q8TEM1, Q92621, Q8N1F7, O75694, P19367, Q8NFH5	8	171	91	10946	3.8835	5.6274	8.50109e-05	0.000521345	0.307636	0.123311	0.00896459	0.756586	0.104094
Reactome_E WT	DAVID Reactome	R-HSA-72766~Translation	720011493	P49411, Q12904, P43307, Q6PI48, Q9P2J5, P41250, P62910, Q9UI10, P47897, Q9NSE4, Q14232, Q9Y2Z4, P46778, P43897	14	171	292	10946	6.79612	3.06905	0.000192167	0.000624113	0.356052	0.0483746	0.0103	0.869288	0.124607
Reactome_E WT	DAVID Reactome	R-HSA-381119~Unfolded Protein Response (UPR)	720010634	P43307, Q15084, P14625, P02545, Q06210, P49748, Q9Y4L1, P27797	8	171	94	10946	3.8835	5.4478	0.000107018	0.000634181	0.360609	0.198201	0.0103	0.869288	0.126616
Reactome_E WT	DAVID Reactome	R-HSA-901042~Calnexin/calreticulin cycle	720011774	Q14697, P27824, P14314, P30101, P27797	5	171	26	10946	2.42718	12.3099	4.42454e-05	0.000642835	0.364501	0.157375	0.0103	0.869288	0.128344
Reactome_E WT	DAVID Reactome	R-HSA-196849~Metabolism of water-soluble vitamins and cofactors	720010253	Q9NVE7, Q96RQ3, P43490, P05165, O00763, P05166, P00387, Q9HCC0, P34897	9	171	124	10946	4.36893	4.64601	0.000136886	0.000685632	0.383401	0.100537	0.010649	0.898741	0.136885
Reactome_E WT	DAVID Reactome	R-HSA-1852241~Organelle biogenesis and maintenance	720010160	P30049, O75947, Q15643, O75964, P18085, O75431, P68371, Q00059, P68366, Q92973, P61006, P04350, Q16891, P06576	14	171	296	10946	6.79612	3.02758	0.00022121	0.000708625	0.393323	0.0554802	0.010649	0.898741	0.141474
Reactome_E WT	DAVID Reactome	R-HSA-9679506~SARS-CoV Infections	720012097	P05556, P53992, Q14697, P49411, P04439, Q8TEM1, Q8N1F7, O75694, Q03135, P14314, P21964, P61088, Q92621, P27824, P05023, P62633, Q8NFH5	17	171	414	10946	8.25243	2.6285	0.000256619	0.00070993	0.393881	0.0640715	0.010649	0.898741	0.141735
Reactome_E WT	DAVID Reactome	R-HSA-9615933~Postmitotic nuclear pore complex (NPC) reformation	720011927	Q92973, Q92621, Q8N1F7, O75694, Q8NFH5	5	171	27	10946	2.42718	11.854	5.36189e-05	0.000745565	0.408929	0.27253	0.0109505	0.924189	0.148846
Reactome_E WT	DAVID Reactome	R-HSA-9705671~SARS-CoV-2 activates/modulates innate and adaptive immune responses	720012171	P53992, P04439, P61088, Q8TEM1, Q92621, Q8N1F7, O75694, P62633, Q8NFH5	9	171	126	10946	4.36893	4.57226	0.000154682	0.000761979	0.415735	0.0767195	0.0109632	0.92526	0.152122
Reactome_E WT	DAVID Reactome	R-HSA-9694516~SARS-CoV-2 Infection	720012126	P53992, Q14697, P49411, P04439, Q8TEM1, Q8N1F7, O75694, Q03135, P14314, P61088, Q92621, P27824, P62633, Q8NFH5	14	171	299	10946	6.79612	2.9972	0.000245407	0.000778175	0.422373	0.118954	0.0109723	0.926028	0.155354
Reactome_E WT	DAVID Reactome	R-HSA-983170~Antigen Presentation: Folding, assembly and peptide loading of class I MHC	720012287	P53992, P04439, P27824, P30101, P27797	5	171	29	10946	2.42718	11.0365	7.69056e-05	0.000984912	0.500778	0.378872	0.013615	1.14906	0.196607
Reactome_E WT	DAVID Reactome	R-HSA-381038~XBP1(S) activates chaperone genes	720010631	P43307, Q15084, P02545, Q06210, P49748, Q9Y4L1	6	171	50	10946	2.91262	7.6814	0.000119708	0.00102602	0.515051	0.288054	0.0139104	1.174	0.204808
Reactome_E WT	DAVID Reactome	R-HSA-611105~Respiratory electron transport	720011314	P21912, P31930, O75306, P42704, Q12931, P31040, P22695, P47985	8	171	103	10946	3.8835	4.97178	0.000202966	0.00109266	0.537331	0.188996	0.0145344	1.22666	0.218103
Reactome_E WT	DAVID Reactome	R-HSA-9609690~HCMV Early Events	720011916	P05556, P68366, Q8TEM1, Q92621, Q8N1F7, P04350, O75694, P68371, Q8NFH5	9	171	135	10946	4.36893	4.26745	0.000260485	0.0011947	0.569482	0.0650049	0.0147204	1.24236	0.238459
Reactome_E WT	DAVID Reactome	R-HSA-381070~IRE1alpha activates chaperones	720010633	P43307, Q15084, P02545, Q06210, P49748, Q9Y4L1	6	171	52	10946	2.91262	7.38596	0.000149462	0.00122756	0.579353	0.43924	0.0147204	1.24236	0.245014
Reactome_E WT	DAVID Reactome	R-HSA-9705683~SARS-CoV-2-host interactions	720012173	P53992, P49411, P04439, P61088, Q8TEM1, Q92621, Q8N1F7, O75694, Q03135, P62633, Q8NFH5	11	171	203	10946	5.33981	3.46861	0.000341113	0.00124982	0.585911	0.0842594	0.0147204	1.24236	0.249454
Reactome_E WT	DAVID Reactome	R-HSA-168273~Influenza Viral RNA Transcription and Replication	720010050	P62910, Q8TEM1, Q92621, Q12849, Q8N1F7, O75694, O00410, Q8NFH5, P46778	9	171	136	10946	4.36893	4.23607	0.000275262	0.0012529	0.586809	0.19191	0.0147204	1.24236	0.250068
Reactome_E WT	DAVID Reactome	R-HSA-5619107~Defective TPR may confer susceptibility towards thyroid papillary carcinoma (TPC)	720011118	Q8TEM1, Q92621, Q8N1F7, O75694, Q8NFH5	5	171	31	10946	2.42718	10.3245	0.00010729	0.00127368	0.592827	0.526413	0.0147204	1.24236	0.254214
Reactome_E WT	DAVID Reactome	R-HSA-170822~Regulation of Glucokinase by Glucokinase Regulatory Protein	720010080	Q8TEM1, Q92621, Q8N1F7, O75694, Q8NFH5	5	171	31	10946	2.42718	10.3245	0.00010729	0.00127368	0.592827	0.526413	0.0147204	1.24236	0.254214
Reactome_E WT	DAVID Reactome	R-HSA-168271~Transport of Ribonucleoproteins into the Host Nucleus	720010049	Q8TEM1, Q92621, Q8N1F7, O75694, Q8NFH5	5	171	31	10946	2.42718	10.3245	0.00010729	0.00127368	0.592827	0.526413	0.0147204	1.24236	0.254214
Reactome_E WT	DAVID Reactome	R-HSA-168333~NEP/NS2 Interacts with the Cellular Export Machinery	720010064	Q8TEM1, Q92621, Q8N1F7, O75694, Q8NFH5	5	171	31	10946	2.42718	10.3245	0.00010729	0.00127368	0.592827	0.526413	0.0147204	1.24236	0.254214
Reactome_E WT	DAVID Reactome	R-HSA-72306~tRNA processing	720011481	O43592, Q8TEM1, Q92621, Q8N1F7, O75694, Q9Y606, Q8NFH5, Q99714	8	171	107	10946	3.8835	4.78592	0.000263942	0.00136558	0.618404	0.184797	0.015528	1.31052	0.272544
Reactome_E WT	DAVID Reactome	R-HSA-71406~Pyruvate metabolism and Citric Acid (TCA) cycle	720011471	P21912, P08559, P10515, P31040, P11177, P21796	6	171	55	10946	2.91262	6.98309	0.00020476	0.00158284	0.672671	0.522728	0.017272	1.4577	0.315871
Reactome_E WT	DAVID Reactome	R-HSA-180910~Vpr-mediated nuclear import of PICs	720010143	Q8TEM1, Q92621, Q8N1F7, O75694, Q8NFH5	5	171	33	10946	2.42718	9.69874	0.000146129	0.00161695	0.68046	0.595416	0.017272	1.4577	0.322671
Reactome_E WT	DAVID Reactome	R-HSA-168274~Export of Viral Ribonucleoproteins from Nucleus	720010051	Q8TEM1, Q92621, Q8N1F7, O75694, Q8NFH5	5	171	33	10946	2.42718	9.69874	0.000146129	0.00161695	0.68046	0.595416	0.017272	1.4577	0.322671
Reactome_E WT	DAVID Reactome	R-HSA-180746~Nuclear import of Rev protein	720010140	Q8TEM1, Q92621, Q8N1F7, O75694, Q8NFH5	5	171	33	10946	2.42718	9.69874	0.000146129	0.00161695	0.68046	0.595416	0.017272	1.4577	0.322671
Reactome_E WT	DAVID Reactome	R-HSA-165054~Rev-mediated nuclear export of HIV RNA	720009990	Q8TEM1, Q92621, Q8N1F7, O75694, Q8NFH5	5	171	34	10946	2.42718	9.41348	0.000169176	0.0018106	0.721302	0.523872	0.0184996	1.56131	0.36128
Reactome_E WT	DAVID Reactome	R-HSA-4085377~SUMOylation of SUMOylation proteins	720010718	Q8TEM1, Q92621, Q8N1F7, O75694, Q8NFH5	5	171	34	10946	2.42718	9.41348	0.000169176	0.0018106	0.721302	0.523872	0.0184996	1.56131	0.36128
Reactome_E WT	DAVID Reactome	R-HSA-159227~Transport of the SLBP independent Mature mRNA	720009927	Q8TEM1, Q92621, Q8N1F7, O75694, Q8NFH5	5	171	34	10946	2.42718	9.41348	0.000169176	0.0018106	0.721302	0.523872	0.0184996	1.56131	0.36128
Reactome_E WT	DAVID Reactome	R-HSA-6784531~tRNA processing in the nucleus	720011332	O43592, Q8TEM1, Q92621, Q8N1F7, O75694, Q8NFH5	6	171	57	10946	2.91262	6.73807	0.000249796	0.0018583	0.730537	0.440157	0.0187158	1.57956	0.37079
Reactome_E WT	DAVID Reactome	R-HSA-159230~Transport of the SLBP Dependant Mature mRNA	720009928	Q8TEM1, Q92621, Q8N1F7, O75694, Q8NFH5	5	171	35	10946	2.42718	9.14453	0.000194898	0.00201975	0.75958	0.479909	0.0196631	1.65951	0.402972
Reactome_E WT	DAVID Reactome	R-HSA-3301854~Nuclear Pore Complex (NPC) Disassembly	720010529	Q8TEM1, Q92621, Q8N1F7, O75694, Q8NFH5	5	171	35	10946	2.42718	9.14453	0.000194898	0.00201975	0.75958	0.479909	0.0196631	1.65951	0.402972
Reactome_E WT	DAVID Reactome	R-HSA-8980692~RHOA GTPase cycle	720011748	O15173, Q96CS3, Q9P0I2, O75955, P49257, O15498, P61586, Q03135, Q86UP2	9	171	147	10946	4.36893	3.91908	0.000488947	0.00205471	0.765443	0.118543	0.0196631	1.65951	0.409939
Reactome_E WT	DAVID Reactome	R-HSA-168256~Immune System	720010046	Q9Y2Q5, P55786, Q16864, P04439, O00264, Q8TEM1, P78527, Q8IV08, P51148, P14314, P30101, P51149, P51809, Q8NF37, P63261, Q8NHP6, P61088, Q00610, P61586, P27824, P63027, P00387, Q8NFH5, P11717, Q96CS3, P05556, P53992, Q9UIQ6, P60604, Q9NP72, P14625, Q86VP6, Q8N1F7, O75694, P68371, O75396, Q05086, O00159, P20700, P17858, Q5T9A4, P68366, Q92621, P04350, Q15075, P27797, Q14165, P46734	48	171	2024	10946	23.301	1.51806	0.00131709	0.00206392	0.766966	0.288253	0.0196631	1.65951	0.411776
Reactome_E WT	DAVID Reactome	R-HSA-177243~Interactions of Rev with host cellular proteins	720010125	Q8TEM1, Q92621, Q8N1F7, O75694, Q8NFH5	5	171	36	10946	2.42718	8.89051	0.000223498	0.00224504	0.794956	0.578962	0.0211034	1.78106	0.44787
Reactome_E WT	DAVID Reactome	R-HSA-9683686~Maturation of spike protein	720012110	Q14697, P27824, P14314	3	171	5	10946	1.45631	38.407	3.66125e-05	0.0023253	0.806261	0.57667	0.0215702	1.82046	0.463862
Reactome_E WT	DAVID Reactome	R-HSA-2262752~Cellular responses to stress	720010418	Q9Y2Q5, Q16864, O43504, P14625, Q8TEM1, Q8N1F7, O75694, Q06210, P68371, Q9Y4L1, P20700, P43307, Q15084, P42704, P68366, P62910, Q92621, P04350, P02545, P49748, P27797, Q8NFH5, P46778, P46734	24	171	789	10946	11.6505	1.94712	0.00122577	0.00249642	0.828329	0.271263	0.0228568	1.92905	0.497956
Reactome_E WT	DAVID Reactome	R-HSA-163210~Formation of ATP by chemiosmotic coupling	720009962	P30049, O75947, O75964, P06576	4	171	18	10946	1.94175	14.2248	0.000148287	0.00252971	0.832321	0.694585	0.0228647	1.92971	0.504587
Reactome_E WT	DAVID Reactome	R-HSA-3232142~SUMOylation of ubiquitinylation proteins	720010516	Q8TEM1, Q92621, Q8N1F7, O75694, Q8NFH5	5	171	38	10946	2.42718	8.42259	0.000290168	0.00274644	0.856138	0.719971	0.0245093	2.06852	0.547758
Reactome_E WT	DAVID Reactome	R-HSA-8953897~Cellular responses to stimuli	720011713	Q9Y2Q5, Q16864, O43504, P14625, Q8TEM1, Q8N1F7, O75694, Q06210, P68371, Q9Y4L1, P20700, P43307, Q15084, P42704, P68366, P62910, Q92621, P04350, P02545, P49748, P27797, Q8NFH5, P46778, P46734	24	171	803	10946	11.6505	1.91318	0.00155611	0.00311524	0.88916	0.330878	0.027453	2.31696	0.621199
Reactome_E WT	DAVID Reactome	R-HSA-9007101~Rab regulation of trafficking	720011769	P62330, Q9H0U4, Q9NP72, P61006, Q15907, P51148, P62820, P51149	8	171	124	10946	3.8835	4.12979	0.000712564	0.00316616	0.893081	0.424042	0.0275574	2.32576	0.631338
Reactome_E WT	DAVID Reactome	R-HSA-168276~NS1 Mediated Effects on Host Pathways	720010053	Q8TEM1, Q92621, Q8N1F7, O75694, Q8NFH5	5	171	40	10946	2.42718	8.00146	0.000370927	0.00331961	0.904078	0.651071	0.0285406	2.40874	0.661885
Reactome_E WT	DAVID Reactome	R-HSA-6798695~Neutrophil degranulation	720011351	P11717, Q9Y2Q5, Q96CS3, Q9NP72, P04439, O00264, Q86VP6, P51148, P68371, P51149, Q8NF37, Q8NHP6, P17858, Q5T9A4, P61586, P00387, Q14165	17	171	482	10946	8.25243	2.25767	0.00142089	0.00338002	0.90809	0.307087	0.0287098	2.42303	0.673909
Reactome_E WT	DAVID Reactome	R-HSA-9609646~HCMV Infection	720011915	P05556, P68366, Q8TEM1, Q92621, Q8N1F7, P04350, O75694, P68371, Q8NFH5	9	171	160	10946	4.36893	3.60066	0.000900981	0.00349032	0.914989	0.502258	0.0292938	2.47231	0.695862
Reactome_E WT	DAVID Reactome	R-HSA-1592230~Mitochondrial biogenesis	720009926	P30049, Q00059, O75947, O75964, O75431, Q16891, P06576	7	171	95	10946	3.39806	4.71665	0.000699744	0.00357246	0.919789	0.514409	0.0296304	2.50072	0.712208
Reactome_E WT	DAVID Reactome	R-HSA-159231~Transport of Mature mRNA Derived from an Intronless Transcript	720009929	Q8TEM1, Q92621, Q8N1F7, O75694, Q8NFH5	5	171	41	10946	2.42718	7.8063	0.000417161	0.00363459	0.923239	0.753267	0.0297952	2.51463	0.724573
Reactome_E WT	DAVID Reactome	R-HSA-159234~Transport of Mature mRNAs Derived from Intronless Transcripts	720009930	Q8TEM1, Q92621, Q8N1F7, O75694, Q8NFH5	5	171	42	10946	2.42718	7.62044	0.000467613	0.00396926	0.939426	0.815372	0.0319236	2.69426	0.791159
Reactome_E WT	DAVID Reactome	R-HSA-70895~Branched-chain amino acid catabolism	720011459	Q96RQ3, P12694, Q9HCC0, Q99714	4	171	21	10946	1.94175	12.1927	0.000279607	0.0039848	0.940089	0.867366	0.0319236	2.69426	0.794249
Reactome_E WT	DAVID Reactome	R-HSA-168325~Viral Messenger RNA Synthesis	720010062	Q8TEM1, Q92621, Q8N1F7, O75694, Q8NFH5	5	171	43	10946	2.42718	7.44322	0.000522527	0.00432419	0.952885	0.941093	0.0342534	2.89089	0.861751
Reactome_E WT	DAVID Reactome	R-HSA-3296482~Defects in vitamin and cofactor metabolism	720010527	Q96RQ3, P05165, P05166, Q9HCC0	4	171	22	10946	1.94175	11.6385	0.000337601	0.00456185	0.960183	0.932834	0.0357345	3.01589	0.909005
Reactome_E WT	DAVID Reactome	R-HSA-4615885~SUMOylation of DNA replication proteins	720010877	Q8TEM1, Q92621, Q8N1F7, O75694, Q8NFH5	5	171	45	10946	2.42718	7.11241	0.000646739	0.00509702	0.972747	0.736921	0.0394879	3.33266	1.01537
Reactome_E WT	DAVID Reactome	R-HSA-1169408~ISG15 antiviral mechanism	720009777	P61088, Q8TEM1, Q92621, Q8N1F7, O75694, Q8NFH5	6	171	72	10946	2.91262	5.33431	0.000886978	0.00515508	0.973845	0.681684	0.0395036	3.33399	1.02691
Reactome_E WT	DAVID Reactome	R-HSA-8854214~TBC/RABGAPs	720011620	P62330, P61006, Q15907, P51148, P51149	5	171	46	10946	2.42718	6.95779	0.000716549	0.00551599	0.979749	0.425817	0.0418148	3.52905	1.09861
Reactome_E WT	DAVID Reactome	R-HSA-379716~Cytosolic tRNA aminoacylation	720010616	Q9P2J5, P41250, P47897, Q12904	4	171	24	10946	1.94175	10.6686	0.000478606	0.00586101	0.984143	0.972174	0.0432984	3.65426	1.16712
Reactome_E WT	DAVID Reactome	R-HSA-190828~Gap junction trafficking	720010195	P63261, P68366, Q00610, P04350, P68371	5	171	47	10946	2.42718	6.80975	0.000791843	0.00595737	0.985191	0.990911	0.0432984	3.65426	1.18625
Reactome_E WT	DAVID Reactome	R-HSA-437239~Recycling pathway of L1	720010804	P63261, P68366, Q00610, P04350, P68371	5	171	47	10946	2.42718	6.80975	0.000791843	0.00595737	0.985191	0.990911	0.0432984	3.65426	1.18625
Reactome_E WT	DAVID Reactome	R-HSA-4570464~SUMOylation of RNA binding proteins	720010874	Q8TEM1, Q92621, Q8N1F7, O75694, Q8NFH5	5	171	47	10946	2.42718	6.80975	0.000791843	0.00595737	0.985191	0.990911	0.0432984	3.65426	1.18625
Reactome_E WT	DAVID Reactome	R-HSA-157858~Gap junction trafficking and regulation	720009924	P63261, P68366, Q00610, P04350, P68371	5	171	49	10946	2.42718	6.53181	0.000959953	0.00690937	0.992464	0.62885	0.0497052	4.19497	1.37516
Reactome_N D377Y	DAVID Reactome	R-HSA-72312~rRNA processing	720011482	Q9Y3U8, Q7L0Y3, P62917, Q8IV48, P18124, P62277, P39023, P62910, P83731, P62753, Q99848, Q07020, Q9H4L4, P46781, Q13601, P36578, Q9NV31, O75691, P84098, Q9NW13, P62241, P46776, P05387, P62841, P27635, P46779, P46778, P62249, Q99714, Q8IY81, Q9BVP2, P42766, P50914, P62899, P40429, P56182, Q9UNQ2, P46087, Q9Y2R4, Q9BVS4, P26373, P62829, Q8IY37, Q96EU6, P42677, P62266, P62861, P15880, Q02543, P62263,…	53	149	205	10946	25.8537	18.9929	4.52769e-55	1.13663e-53	5.54674e-51	3.50443e-52	5.54674e-51	4.9557e-49	2.26861e-51
Reactome_N D377Y	DAVID Reactome	R-HSA-8868773~rRNA processing in the nucleus and cytosol	720011644	Q9Y3U8, P62917, Q8IV48, P18124, P62277, P39023, P62910, P83731, P62753, Q99848, Q07020, Q9H4L4, P46781, Q13601, P36578, Q9NV31, O75691, P84098, Q9NW13, P62241, P46776, P05387, P62841, P27635, P46779, P46778, P62249, Q8IY81, Q9BVP2, P42766, P50914, P62899, P40429, P56182, Q9UNQ2, P46087, Q9Y2R4, Q9BVS4, P26373, P62829, Q8IY37, Q96EU6, P42677, P62266, P62861, P15880, Q02543, P62263, P62701, P62269,…	51	149	195	10946	24.878	19.2134	3.67193e-53	9.35952e-52	4.56745e-49	9.47358e-51	2.28372e-49	2.04038e-47	1.86808e-49
Reactome_N D377Y	DAVID Reactome	R-HSA-6791226~Major pathway of rRNA processing in the nucleolus and cytosol	720011341	Q9Y3U8, P62917, Q8IV48, P18124, P62277, P39023, P62910, P83731, P62753, Q99848, Q07020, Q9H4L4, P46781, Q13601, P36578, Q9NV31, O75691, P84098, Q9NW13, P62241, P46776, P05387, P62841, P27635, P46779, P46778, P62249, Q8IY81, Q9BVP2, P42766, P50914, P62899, P40429, P56182, Q9Y2R4, Q9BVS4, P26373, P62829, Q8IY37, Q96EU6, P42677, P62266, P62861, P15880, Q02543, P62263, P62701, P62269, Q9NXF1	49	149	185	10946	23.9024	19.4578	2.84288e-51	7.36871e-50	3.59593e-47	2.20039e-48	1.19864e-47	1.07092e-45	1.47073e-47
Reactome_N D377Y	DAVID Reactome	R-HSA-1799339~SRP-dependent cotranslational protein targeting to membrane	720010133	Q9Y3U8, P62917, P18124, Q9UHB9, P42766, P62277, P50914, P39023, P62899, P62910, P40429, P83731, P62753, Q07020, P04843, P26373, P62829, P46781, P36578, P42677, O76094, P62266, P84098, P62861, P15880, Q02543, P62263, P62241, P62701, P62841, P46776, P62269, P05387, P27635, P46779, P46778, P62249	37	149	113	10946	18.0488	24.0543	2.83086e-42	9.85795e-41	4.81068e-38	5.84289e-39	1.20267e-38	1.07452e-36	1.96756e-38
Reactome_N D377Y	DAVID Reactome	R-HSA-2408522~Selenoamino acid metabolism	720010424	Q9Y3U8, P62917, Q12904, P18124, P42766, P62277, P50914, P41252, P39023, P62899, P62910, P40429, P83731, P62753, Q07020, P26373, P62829, P46781, P36578, P42677, P62266, P84098, P62861, P15880, Q02543, P62263, P62241, P62701, P62841, P46776, P62269, P05387, P27635, P46779, P56192, P46778, P62249	37	149	119	10946	18.0488	22.8415	2.63576e-41	8.51503e-40	4.15534e-37	2.04008e-38	7.46308e-38	6.66784e-36	1.69952e-37
Reactome_N D377Y	DAVID Reactome	R-HSA-156902~Peptide chain elongation	720009921	Q9Y3U8, P62917, P18124, P42766, P62277, P50914, P39023, P62899, P62910, P40429, P83731, P62753, Q07020, P26373, P62829, P46781, P36578, P42677, P62266, P84098, P62861, P15880, Q02543, P62263, P62241, P62701, P62841, P46776, P62269, P05387, P27635, P46779, P46778, P62249	34	149	90	10946	16.5854	27.7527	2.47648e-41	1.07052e-39	5.22416e-37	4.47253e-38	7.46308e-38	6.66784e-36	2.13667e-37
Reactome_N D377Y	DAVID Reactome	R-HSA-192823~Viral mRNA Translation	720010210	Q9Y3U8, P62917, P18124, P42766, P62277, P50914, P39023, P62899, P62910, P40429, P83731, P62753, Q07020, P26373, P62829, P46781, P36578, P42677, P62266, P84098, P62861, P15880, Q02543, P62263, P62241, P62701, P62841, P46776, P62269, P05387, P27635, P46779, P46778, P62249	34	149	90	10946	16.5854	27.7527	2.47648e-41	1.07052e-39	5.22416e-37	4.47253e-38	7.46308e-38	6.66784e-36	2.13667e-37
Reactome_N D377Y	DAVID Reactome	R-HSA-156842~Eukaryotic Translation Elongation	720009920	Q9Y3U8, P62917, P18124, P42766, P62277, P50914, P39023, P62899, P62910, P40429, P83731, P62753, Q07020, P26373, P62829, P46781, P36578, P42677, P62266, P84098, P62861, P15880, Q02543, P62263, P62241, P62701, P62841, P46776, P62269, P05387, P27635, P46779, P46778, P62249	34	149	94	10946	16.5854	26.5718	1.48411e-40	5.99477e-39	2.92545e-36	3.0632e-37	2.92545e-37	2.61372e-35	1.1965e-36
Reactome_N D377Y	DAVID Reactome	R-HSA-2408557~Selenocysteine synthesis	720010427	Q9Y3U8, P62917, P18124, P42766, P62277, P50914, P39023, P62899, P62910, P40429, P83731, P62753, Q07020, P26373, P62829, P46781, P36578, P42677, P62266, P84098, P62861, P15880, Q02543, P62263, P62241, P62701, P62841, P46776, P62269, P05387, P27635, P46779, P46778, P62249	34	149	94	10946	16.5854	26.5718	1.48411e-40	5.99477e-39	2.92545e-36	3.0632e-37	2.92545e-37	2.61372e-35	1.1965e-36
Reactome_N D377Y	DAVID Reactome	R-HSA-72764~Eukaryotic Translation Termination	720011492	Q9Y3U8, P62917, P18124, P42766, P62277, P50914, P39023, P62899, P62910, P40429, P83731, P62753, Q07020, P26373, P62829, P46781, P36578, P42677, P62266, P84098, P62861, P15880, Q02543, P62263, P62241, P62701, P62841, P46776, P62269, P05387, P27635, P46779, P46778, P62249	34	149	94	10946	16.5854	26.5718	1.48411e-40	5.99477e-39	2.92545e-36	3.0632e-37	2.92545e-37	2.61372e-35	1.1965e-36
Reactome_N D377Y	DAVID Reactome	R-HSA-975956~Nonsense Mediated Decay (NMD) independent of the Exon Junction Complex (EJC)	720012258	Q9Y3U8, P62917, P18124, P42766, P62277, P50914, P39023, P62899, P62910, P40429, P83731, P62753, Q07020, P26373, P62829, P46781, P36578, P42677, P62266, P84098, P62861, P15880, Q02543, P62263, P62241, P62701, P62841, P46776, P62269, P05387, P27635, P46779, P46778, P62249	34	149	96	10946	16.5854	26.0182	3.50337e-40	1.37019e-38	6.68653e-36	4.51934e-37	6.07866e-37	5.43094e-35	2.73478e-36
Reactome_N D377Y	DAVID Reactome	R-HSA-72766~Translation	720011493	Q9Y3U8, P62917, Q12904, P18124, Q9UHB9, P42766, Q9NWU5, P62277, P50914, Q6PI48, P41252, P39023, P62899, P62910, P40429, P83731, P62753, Q14232, Q07020, P82914, P04843, P49411, P26373, P62829, P46781, P36578, P42677, O76094, P62266, Q9Y3B7, P84098, P62861, P15880, Q02543, P62263, P62241, P62701, Q9UI10, P62841, P46776, P62269, P05387, P27635, P46779, P56192, P46778, Q16540, P62249	48	149	292	10946	23.4146	12.0761	1.72487e-39	2.44899e-38	1.19511e-35	4.45016e-37	9.95924e-37	8.89801e-35	4.88797e-36
Reactome_N D377Y	DAVID Reactome	R-HSA-72613~Eukaryotic Translation Initiation	720011483	Q9Y3U8, P62917, P18124, P42766, P62277, P50914, P39023, P62899, P62910, P40429, P83731, P62753, Q14232, Q07020, P26373, P62829, P46781, P36578, P42677, P62266, P84098, P62861, P15880, Q02543, P62263, P62241, P62701, Q9UI10, P62841, P46776, P62269, P05387, P27635, P46779, P46778, P62249	36	149	120	10946	17.561	22.0389	1.57503e-39	4.83425e-38	2.35911e-35	1.21907e-36	1.68508e-36	1.50552e-34	9.64873e-36
Reactome_N D377Y	DAVID Reactome	R-HSA-72737~Cap-dependent Translation Initiation	720011491	Q9Y3U8, P62917, P18124, P42766, P62277, P50914, P39023, P62899, P62910, P40429, P83731, P62753, Q14232, Q07020, P26373, P62829, P46781, P36578, P42677, P62266, P84098, P62861, P15880, Q02543, P62263, P62241, P62701, Q9UI10, P62841, P46776, P62269, P05387, P27635, P46779, P46778, P62249	36	149	120	10946	17.561	22.0389	1.57503e-39	4.83425e-38	2.35911e-35	1.21907e-36	1.68508e-36	1.50552e-34	9.64873e-36
Reactome_N D377Y	DAVID Reactome	R-HSA-9633012~Response of EIF2AK4 (GCN2) to amino acid deficiency	720011951	Q9Y3U8, P62917, P18124, P42766, P62277, P50914, P39023, P62899, P62910, P40429, P83731, P62753, Q07020, P26373, P62829, P46781, P36578, P42677, P62266, P84098, P62861, P15880, Q02543, P62263, P62241, P62701, P62841, P46776, P62269, P05387, P27635, P46779, P46778, P62249	34	149	102	10946	16.5854	24.4877	4.04302e-39	1.44375e-37	7.04551e-35	4.1724e-36	4.40345e-36	3.93423e-34	2.8816e-35
Reactome_N D377Y	DAVID Reactome	R-HSA-72689~Formation of a pool of free 40S subunits	720011486	Q9Y3U8, P62917, P18124, P42766, P62277, P50914, P39023, P62899, P62910, P40429, P83731, P62753, Q07020, P26373, P62829, P46781, P36578, P42677, P62266, P84098, P62861, P15880, Q02543, P62263, P62241, P62701, P62841, P46776, P62269, P05387, P27635, P46779, P46778, P62249	34	149	102	10946	16.5854	24.4877	4.04302e-39	1.44375e-37	7.04551e-35	4.1724e-36	4.40345e-36	3.93423e-34	2.8816e-35
Reactome_N D377Y	DAVID Reactome	R-HSA-168273~Influenza Viral RNA Transcription and Replication	720010050	Q9Y3U8, P62917, P18124, P42766, P62277, P50914, P39023, P62899, P62910, P40429, P83731, P62753, Q07020, P26373, P62829, P46781, P36578, Q8N1F7, P42677, P62266, P84098, P62861, P15880, Q02543, P62263, P62241, P62701, Q92621, Q5SRE5, P62841, P46776, P62269, P05387, P27635, P46779, P46778, P62249	37	149	136	10946	18.0488	19.9863	7.38338e-39	1.97977e-37	9.66126e-35	5.71473e-36	5.68309e-36	5.07752e-34	3.95143e-35
Reactome_N D377Y	DAVID Reactome	R-HSA-156827~L13a-mediated translational silencing of Ceruloplasmin expression	720009919	Q9Y3U8, P62917, P18124, P42766, P62277, P50914, P39023, P62899, P62910, P40429, P83731, P62753, Q07020, P26373, P62829, P46781, P36578, P42677, P62266, P84098, P62861, P15880, Q02543, P62263, P62241, P62701, P62841, P46776, P62269, P05387, P27635, P46779, P46778, P62249	34	149	112	10946	16.5854	22.3013	1.63442e-37	5.09769e-36	2.48767e-33	1.68673e-34	1.38204e-34	1.23477e-32	1.01745e-33
Reactome_N D377Y	DAVID Reactome	R-HSA-72706~GTP hydrolysis and joining of the 60S ribosomal subunit	720011489	Q9Y3U8, P62917, P18124, P42766, P62277, P50914, P39023, P62899, P62910, P40429, P83731, P62753, Q07020, P26373, P62829, P46781, P36578, P42677, P62266, P84098, P62861, P15880, Q02543, P62263, P62241, P62701, P62841, P46776, P62269, P05387, P27635, P46779, P46778, P62249	34	149	113	10946	16.5854	22.1039	2.31303e-37	7.12406e-36	3.47654e-33	4.7741e-34	1.82976e-34	1.63478e-32	1.4219e-33
Reactome_N D377Y	DAVID Reactome	R-HSA-975957~Nonsense Mediated Decay (NMD) enhanced by the Exon Junction Complex (EJC)	720012259	Q9Y3U8, P62917, P18124, P42766, P62277, P50914, P39023, P62899, P62910, P40429, P83731, P62753, Q07020, P26373, P62829, P46781, P36578, P42677, P62266, P84098, P62861, P15880, Q02543, P62263, P62241, P62701, P62841, P46776, P62269, P05387, P27635, P46779, P46778, P62249	34	149	116	10946	16.5854	21.5323	6.41131e-37	1.90329e-35	9.28805e-33	8.27059e-34	4.42288e-34	3.95159e-32	3.79879e-33
Reactome_N D377Y	DAVID Reactome	R-HSA-927802~Nonsense-Mediated Decay (NMD)	720011890	Q9Y3U8, P62917, P18124, P42766, P62277, P50914, P39023, P62899, P62910, P40429, P83731, P62753, Q07020, P26373, P62829, P46781, P36578, P42677, P62266, P84098, P62861, P15880, Q02543, P62263, P62241, P62701, P62841, P46776, P62269, P05387, P27635, P46779, P46778, P62249	34	149	116	10946	16.5854	21.5323	6.41131e-37	1.90329e-35	9.28805e-33	8.27059e-34	4.42288e-34	3.95159e-32	3.79879e-33
Reactome_N D377Y	DAVID Reactome	R-HSA-168255~Influenza Infection	720010045	Q9Y3U8, P62917, P18124, P42766, P62277, P50914, P39023, P62899, P62910, P40429, P83731, P62753, Q07020, P26373, P62829, P46781, P36578, Q8N1F7, P42677, P62266, P84098, P62861, P15880, Q02543, P62263, P62241, P62701, Q92621, Q5SRE5, P62841, P46776, P62269, P05387, P27635, P46779, P46778, P62249	37	149	157	10946	18.0488	17.313	2.65281e-36	5.87867e-35	2.86879e-32	1.36885e-33	1.304e-33	1.16505e-31	1.17333e-32
Reactome_N D377Y	DAVID Reactome	R-HSA-8953854~Metabolism of RNA	720011712	Q9Y3U8, O43592, Q7L0Y3, P62917, Q8IV48, P18124, P62277, P39023, P62910, P83731, P62753, Q99848, Q16637, Q07020, Q9H4L4, Q08J23, P46781, Q13601, P36578, Q9NV31, O75691, P84098, Q9NW13, P62241, P46776, P05387, P62841, P27635, P46779, P46778, P62249, Q99714, Q8IY81, Q9BVP2, P42766, P50914, P62899, P40429, P56182, Q9UNQ2, P46087, Q9Y2R4, Q9BVS4, P26373, P62829, Q8N1F7, Q8IY37, Q96QD9, Q96EU6, P42677,…	62	149	716	10946	30.2439	6.36133	7.45899e-35	5.11667e-34	2.49693e-31	1.92442e-32	1.08562e-32	9.69942e-31	1.02124e-31
Reactome_N D377Y	DAVID Reactome	R-HSA-9711097~Cellular response to starvation	720012189	Q9Y3U8, P62917, P18124, P42766, P62277, P50914, P39023, P62899, P62910, P40429, P83731, P62753, Q07020, P26373, P62829, P46781, P36578, P42677, P62266, P84098, P62861, P15880, Q02543, P62263, P62241, P62701, P62841, P46776, P62269, P05387, P27635, P46779, P46778, P62249	34	149	157	10946	16.5854	15.9092	5.59464e-32	1.1117e-30	5.42508e-28	2.88684e-29	2.26045e-29	2.01958e-27	2.21885e-28
Reactome_N D377Y	DAVID Reactome	R-HSA-9010553~Regulation of expression of SLITs and ROBOs	720011775	Q9Y3U8, P62917, P18124, P42766, P62277, P50914, P39023, P62899, P62910, P40429, P83731, P62753, Q07020, P26373, P62829, P46781, P36578, O43347, P42677, P62266, P84098, P62861, P15880, Q02543, P62263, P62241, P62701, P62841, P46776, P62269, P05387, P27635, P46779, P46778, P62249	35	149	172	10946	17.0732	14.9489	6.47396e-32	1.18992e-30	5.80679e-28	1.67028e-29	2.32271e-29	2.07521e-27	2.37496e-28
Reactome_N D377Y	DAVID Reactome	R-HSA-376176~Signaling by ROBO receptors	720010607	Q9Y3U8, P62917, P18124, P42766, P62277, P50914, P39023, P62899, P62910, P40429, P83731, P61586, P62753, Q07020, P26373, P62829, P46781, P36578, O43347, P42677, P62266, P84098, P62861, P15880, Q02543, P62263, P62241, P62701, P62841, P46776, P62269, P05387, P27635, P46779, P46778, P62249	36	149	219	10946	17.561	12.0761	2.35588e-29	3.34037e-28	1.6301e-25	6.07817e-27	6.26962e-27	5.60154e-25	6.66708e-26
Reactome_N D377Y	DAVID Reactome	R-HSA-71291~Metabolism of amino acids and derivatives	720011466	Q9Y3U8, P62917, Q12904, P18124, P12694, P42766, P62277, Q96RQ3, P50914, P41252, P39023, P62899, P62910, P40429, Q9UJS0, P83731, P62753, Q07020, P26373, P62829, P46781, P36578, Q9HCC0, P42677, P62266, P84098, P62861, P15880, Q02543, P62263, P62241, P62701, P62841, P46776, P62269, P05387, P27635, P46779, P56192, P46778, P62249, Q99714	42	149	376	10946	20.4878	8.20598	2.52191e-27	2.29134e-26	1.11818e-23	6.50652e-25	4.14139e-25	3.7001e-23	4.57332e-24
Reactome_N D377Y	DAVID Reactome	R-HSA-5663205~Infectious disease	720011233	Q9Y3U8, Q14204, P62917, P18124, P51149, P62277, Q9H0U3, P39023, P62910, P83731, P62753, Q14573, Q16637, Q07020, P04843, P49411, P46781, P36578, O00159, P84098, P62241, P05141, P05023, P46776, P05387, P62841, P27635, P46779, P46977, P46778, P62249, P12235, P42766, P50914, P62899, P40429, P26373, P62829, Q8N1F7, P68371, P42677, P62266, P62861, P15880, Q02543, P62263, P62701, Q92621, Q5SRE5, P62269	51	149	960	10946	24.878	3.90273	1.76938e-18	7.18634e-18	3.50694e-15	4.56501e-16	1.25248e-16	1.11902e-14	1.43433e-15
Reactome_N D377Y	DAVID Reactome	R-HSA-422475~Axon guidance	720010756	Q9Y3U8, P62917, P18124, P42766, P62277, P50914, P39023, P62899, P62910, P40429, P83731, P61586, P62753, Q07020, P26373, P62829, P46781, P36578, O43347, P68371, P42677, P62266, P84098, P62861, P15880, Q02543, P62263, P62241, P62701, P62841, P46776, P62269, P05387, P27635, P46779, P46778, P62249	37	149	553	10946	18.0488	4.91525	1.98242e-16	1.25021e-15	5.95968e-13	5.72875e-14	2.1038e-14	1.87963e-12	2.44249e-13
Reactome_N D377Y	DAVID Reactome	R-HSA-9754678~SARS-CoV-2 modulates host translation machinery	720012238	Q16637, P46781, P42677, P62266, P62277, P15880, P62861, P62263, P62241, P62701, P62841, P62269, P62753, P62249	15	149	51	10946	7.31707	21.6068	1.01648e-16	3.0974e-15	1.51701e-12	2.86438e-13	5.03843e-14	4.50155e-12	6.21725e-13
Reactome_N D377Y	DAVID Reactome	R-HSA-9675108~Nervous system development	720012086	Q9Y3U8, P62917, P18124, P42766, P62277, P50914, P39023, P62899, P62910, P40429, P83731, P61586, P62753, Q07020, P26373, P62829, P46781, P36578, O43347, P68371, P42677, P62266, P84098, P62861, P15880, Q02543, P62263, P62241, P62701, P62841, P46776, P62269, P05387, P27635, P46779, P46778, P62249	37	149	578	10946	18.0488	4.70265	9.30554e-16	4.83155e-15	2.38387e-12	2.2915e-13	7.60579e-14	6.79533e-12	9.76996e-13
Reactome_N D377Y	DAVID Reactome	R-HSA-392499~Metabolism of proteins	720010689	Q9Y3U8, Q14204, P18085, P62917, Q12904, P18124, P51148, P51149, Q9NWU5, Q9UHB9, P62277, Q9H0U3, Q6PI48, P41252, P39023, P62910, P83731, Q9Y2T2, P61586, P62753, Q14694, Q07020, Q07065, P82914, P04843, P49411, Q9NP72, P46781, P36578, Q9Y3B7, P84098, P62241, Q9UI10, P46776, P05387, P62841, P27635, Q6IQ22, P46779, Q9BUN8, P46977, P46778, P62249, P78527, P42766, P50914, P62899, P40429, Q14232, P26373,…	68	149	1970	10946	33.1707	2.53578	4.95099e-15	1.28781e-14	6.28475e-12	1.28897e-12	1.96391e-13	1.75464e-11	2.57572e-12
Reactome_N D377Y	DAVID Reactome	R-HSA-2262752~Cellular responses to stress	720010418	P53004, Q9Y3U8, Q14204, P62917, P18124, P42766, P62277, P50914, P42704, P39023, P62899, P62910, P40429, P83731, P62753, Q07020, P26373, P62829, P46781, P36578, Q8N1F7, P68371, Q9Y4L1, P42677, P62266, P84098, P62861, P15880, Q02543, P62263, P62241, P62701, Q92621, Q5SRE5, P62841, P46776, P62269, P05387, P27635, P46779, P46778, P62249	42	149	789	10946	20.4878	3.91058	4.96378e-15	2.04701e-14	9.96891e-12	1.28897e-12	3.02709e-13	2.70453e-11	4.07452e-12
Reactome_N D377Y	DAVID Reactome	R-HSA-9735869~SARS-CoV-1 modulates host translation machinery	720012221	P46781, P42677, P62266, P62277, P15880, P62861, P62263, P62241, P62701, P62841, P62269, P62753, P62249	13	149	37	10946	6.34146	25.8114	8.53793e-16	3.29517e-14	1.60911e-11	3.89555e-12	4.72954e-13	4.22558e-11	6.58362e-12
Reactome_N D377Y	DAVID Reactome	R-HSA-8953897~Cellular responses to stimuli	720011713	P53004, Q9Y3U8, Q14204, P62917, P18124, P42766, P62277, P50914, P42704, P39023, P62899, P62910, P40429, P83731, P62753, Q07020, P26373, P62829, P46781, P36578, Q8N1F7, P68371, Q9Y4L1, P42677, P62266, P84098, P62861, P15880, Q02543, P62263, P62241, P62701, Q92621, Q5SRE5, P62841, P46776, P62269, P05387, P27635, P46779, P46778, P62249	42	149	803	10946	20.4878	3.8424	9.27771e-15	3.70688e-14	1.80957e-11	2.40608e-12	5.16845e-13	4.61771e-11	7.40519e-12
Reactome_N D377Y	DAVID Reactome	R-HSA-1643685~Disease	720009979	Q9Y3U8, Q14204, P62917, P78549, P18124, P51149, P62277, Q96RQ3, Q9H0U3, P39023, P62910, P83731, P62753, Q14573, Q16637, Q07020, P04843, P49411, P46781, P36578, O00159, P84095, P84098, P62241, P05141, P05023, P46776, P05387, P62841, P27635, P46779, Q9BUN8, P46977, P46778, P62249, P12235, P42766, P50914, P62899, P40429, P27448, P26373, P62829, Q8N1F7, P68371, Q9HCC0, P42677, P62266, P62861, P15880,…	60	149	1748	10946	29.2683	2.52162	7.23531e-13	1.87435e-12	9.14702e-10	1.86671e-10	2.54079e-11	2.27005e-09	3.74112e-10
Reactome_N D377Y	DAVID Reactome	R-HSA-72695~Formation of the ternary complex, and subsequently, the 43S complex	720011487	P46781, P42677, P62266, P62277, P15880, P62861, P62263, P62241, P62701, P62841, P62269, P62753, P62249	13	149	52	10946	6.34146	18.3658	1.30621e-13	3.08894e-12	1.50742e-09	5.05705e-10	4.07406e-11	3.63994e-09	6.16529e-10
Reactome_N D377Y	DAVID Reactome	R-HSA-72649~Translation initiation complex formation	720011484	P46781, P42677, P62266, P62277, P15880, P62861, P62263, P62241, P62701, P62841, P62269, P62753, P62249	13	149	59	10946	6.34146	16.1868	7.67615e-13	1.54537e-11	7.54138e-09	3.16869e-09	1.93369e-10	1.72764e-08	3.08441e-09
Reactome_N D377Y	DAVID Reactome	R-HSA-72702~Ribosomal scanning and start codon recognition	720011488	P46781, P42677, P62266, P62277, P15880, P62861, P62263, P62241, P62701, P62841, P62269, P62753, P62249	13	149	59	10946	6.34146	16.1868	7.67615e-13	1.54537e-11	7.54138e-09	3.16869e-09	1.93369e-10	1.72764e-08	3.08441e-09
Reactome_N D377Y	DAVID Reactome	R-HSA-72662~Activation of the mRNA upon binding of the cap-binding complex and eIFs, and subsequent binding to 43S	720011485	P46781, P42677, P62266, P62277, P15880, P62861, P62263, P62241, P62701, P62841, P62269, P62753, P62249	13	149	60	10946	6.34146	15.917	9.68631e-13	1.90952e-11	9.31844e-09	1.99933e-09	2.29202e-10	2.04779e-08	3.81123e-09
Reactome_N D377Y	DAVID Reactome	R-HSA-1430728~Metabolism	720009866	P53004, Q9Y3U8, P48651, A0FGR8, O75027, P62917, O95470, Q12904, P36542, P18124, P12694, P62277, Q96RQ3, P42704, P41252, P39023, P62910, Q9UJS0, P83731, P62753, Q14573, Q07020, P48047, Q9UI09, P04406, P46781, P36578, Q7LGA3, P84098, P62241, P46776, P05387, P62841, P27635, P46779, P46778, P62249, Q99714, O00763, O95299, P42126, P42766, P50914, P62899, P40429, P26373, P62829, Q12931, Q8N1F7, Q9HCC0,…	65	149	2118	10946	31.7073	2.25453	8.34204e-12	1.92567e-11	9.39727e-09	2.15223e-09	2.29202e-10	2.04779e-08	3.84347e-09
Reactome_N D377Y	DAVID Reactome	R-HSA-9705683~SARS-CoV-2-host interactions	720012173	Q16637, P49411, P46781, Q8N1F7, P42677, P62266, P62277, P15880, P62861, P62263, P62241, P62701, Q92621, Q5SRE5, P62841, P62269, P62753, P62249	19	149	203	10946	9.26829	6.87586	3.14666e-11	2.3591e-10	1.15124e-07	8.11838e-09	2.74105e-09	2.44897e-07	4.70855e-08
Reactome_N D377Y	DAVID Reactome	R-HSA-6790901~rRNA modification in the nucleus and cytosol	720011339	Q9UNQ2, P15880, P46087, Q9Y2R4, P62263, P46781, Q13601, Q8IY37, P62753, Q96EU6, Q9NV31, O75691	12	149	61	10946	5.85366	14.4518	2.54501e-11	4.44984e-10	2.17152e-07	5.90951e-08	5.05005e-09	4.51193e-07	8.88148e-08
Reactome_N D377Y	DAVID Reactome	R-HSA-9694516~SARS-CoV-2 Infection	720012126	Q16637, P04843, P49411, P46781, Q8N1F7, P42677, P62266, P62277, P15880, P62861, Q9H0U3, P62263, P62241, P62701, Q92621, Q5SRE5, P62841, P62269, P62753, P46977, P62249	22	149	299	10946	10.7317	5.40531	9.12356e-11	5.27537e-10	2.57438e-07	4.70776e-08	5.85086e-09	5.22741e-07	1.05292e-07
Reactome_N D377Y	DAVID Reactome	R-HSA-9692914~SARS-CoV-1-host interactions	720012119	P46781, P42677, P62266, P62277, P15880, P62861, P62263, P62241, P62701, P62841, P62269, P62753, P62249	13	149	96	10946	6.34146	9.94813	4.97751e-10	5.62288e-09	2.74396e-06	6.42099e-07	6.0977e-08	5.44795e-06	1.12228e-06
Reactome_N D377Y	DAVID Reactome	R-HSA-9679506~SARS-CoV Infections	720012097	Q16637, P04843, P49411, P46781, Q8N1F7, P42677, P62266, P62277, P15880, P62861, Q9H0U3, P62263, P62241, P62701, Q92621, Q5SRE5, P05023, P62841, P62269, P62753, P46977, P62249	23	149	414	10946	11.2195	4.08128	8.10449e-09	3.48408e-08	1.70022e-05	2.09096e-06	3.69615e-07	3.3023e-05	6.9539e-06
Reactome_N D377Y	DAVID Reactome	R-HSA-9678108~SARS-CoV-1 Infection	720012093	P46781, P42677, P62266, P62277, P15880, P62861, P62263, P62241, P62701, P62841, P62269, P62753, P62249	13	149	142	10946	6.34146	6.72549	6.28092e-08	4.60233e-07	0.000224569	6.4817e-05	4.77859e-06	0.00042694	9.18584e-05
Reactome_N D377Y	DAVID Reactome	R-HSA-1266738~Developmental Biology	720009813	Q9Y3U8, P62917, P18124, P42766, P62277, P50914, P39023, P62899, P62910, P40429, P83731, P61586, P62753, Q07020, P26373, P62829, P46781, P36578, O43347, P68371, P42677, P62266, P84098, P62861, P15880, Q02543, P62263, P62241, P62701, P62841, P46776, P62269, P05387, P27635, P46779, P46778, P62249	37	149	1152	10946	18.0488	2.35949	4.40684e-07	1.07329e-06	0.000523631	0.00011369	1.09118e-05	0.000974909	0.00021422
Reactome_N D377Y	DAVID Reactome	R-HSA-196780~Biotin transport and metabolism	720010246	Q96RQ3, P05165, O00763, P05166, Q9HCC0	5	149	11	10946	2.43902	33.3923	1.89029e-07	9.83761e-06	0.00478927	0.00287326	9.79746e-05	0.00875347	0.00196349
Reactome_N D377Y	DAVID Reactome	R-HSA-3371599~Defective HLCS causes multiple carboxylase deficiency	720010558	Q96RQ3, P05165, P05166, Q9HCC0	4	149	7	10946	1.95122	41.9789	1.11821e-06	8.14738e-05	0.0389808	0.0174444	0.000795185	0.0710452	0.0162608
Reactome_N D377Y	DAVID Reactome	R-HSA-3323169~Defects in biotin (Btn) metabolism	720010537	Q96RQ3, P05165, P05166, Q9HCC0	4	149	8	10946	1.95122	36.7315	2.21273e-06	0.000129066	0.0610454	0.0386253	0.00123498	0.110339	0.0257587
Reactome_N D377Y	DAVID Reactome	R-HSA-176033~Interactions of Vpr with host cellular proteins	720010112	Q92621, P05141, Q5SRE5, Q8N1F7, P12235	5	149	36	10946	2.43902	10.2032	0.000117223	0.00135035	0.482847	0.364713	0.0126725	1.13222	0.269337
Reactome_N D377Y	DAVID Reactome	R-HSA-70895~Branched-chain amino acid catabolism	720011459	Q96RQ3, P12694, Q9HCC0, Q99714	4	149	21	10946	1.95122	13.993	0.000164797	0.00269441	0.731968	0.695959	0.0248089	2.21654	0.537059
Reactome_N D377Y	DAVID Reactome	R-HSA-3296482~Defects in vitamin and cofactor metabolism	720010527	Q96RQ3, P05165, P05166, Q9HCC0	4	149	22	10946	1.95122	13.3569	0.000199297	0.00308918	0.779058	0.796916	0.0279171	2.49423	0.615625
Reactome_N D377Y	DAVID Reactome	R-HSA-72306~tRNA processing	720011481	O43592, Q08J23, Q7L0Y3, Q92621, Q5SRE5, Q8N1F7, Q99714	7	149	107	10946	3.41463	4.806	0.000629828	0.00325568	0.796352	0.385926	0.0288868	2.58087	0.648751
Reactome_N D377Y	DAVID Reactome	R-HSA-191859~snRNP Assembly	720010206	Q16637, Q92621, Q5SRE5, Q8N1F7	5	149	53	10946	2.43902	6.93048	0.000741148	0.00562327	0.936194	0.61574	0.0481431	4.30131	1.11921
Reactome_N D377Y	DAVID Reactome	R-HSA-194441~Metabolism of non-coding RNA	720010233	Q16637, Q92621, Q5SRE5, Q8N1F7	5	149	53	10946	2.43902	6.93048	0.000741148	0.00562327	0.936194	0.61574	0.0481431	4.30131	1.11921
Reactome_N D3L	DAVID Reactome	R-HSA-379724~tRNA Aminoacylation	720010617	Q9NP81, P49591, Q6PI48, P41250, P49589, P49588, O43776, Q9NSE4, Q9BW92	9	188	42	10946	3.27273	12.4764	2.93703e-08	4.48635e-07	0.000371849	0.00010608	0.000371918	0.0363843	8.96188e-05
Reactome_N D3L	DAVID Reactome	R-HSA-71406~Pyruvate metabolism and Citric Acid (TCA) cycle	720011471	P21912, Q02218, P08559, P00338, P10515, P40926, P31040, Q04760, P35613	9	188	55	10946	3.27273	9.52747	3.45538e-07	3.82857e-06	0.00316886	0.0012473	0.00158694	0.155249	0.000764791
Reactome_N D3L	DAVID Reactome	R-HSA-1428517~The citric acid (TCA) cycle and respiratory electron transport	720009865	P31930, P08559, P13804, P10515, P40926, Q04760, P35613, P21912, Q02218, P42704, P00338, P31040, P06576	13	188	178	10946	4.72727	4.25227	1.16497e-05	5.31503e-05	0.0431061	0.00300114	0.0140481	1.37431	0.010617
Reactome_N D3L	DAVID Reactome	R-HSA-901042~Calnexin/calreticulin cycle	720011774	Q9NYU2, Q14697, P27824, P14314, P30101, P27797	6	188	26	10946	2.18182	13.4362	4.09921e-06	6.77834e-05	0.0546446	0.0157388	0.0140481	1.37431	0.0135399
Reactome_N D3L	DAVID Reactome	R-HSA-72766~Translation	720011493	Q9NP81, P49591, O75822, P11940, O43776, Q9BW92, Q9NWU5, Q6PI48, P41250, P15170, P49589, Q9UI30, P49588, Q9NSE4, P47813, P43897	16	188	292	10946	5.81818	3.19032	4.24296e-05	0.000143293	0.112014	0.0108874	0.0237581	2.32422	0.0286221
Reactome_N D3L	DAVID Reactome	R-HSA-532668~N-glycan trimming in the ER and Calnexin/Calreticulin cycle	720010950	Q9NYU2, Q14697, P27824, P14314, P30101, P27797	6	188	35	10946	2.18182	9.98116	2.54143e-05	0.000295342	0.217197	0.0817087	0.0356419	3.4868	0.0589885
Reactome_N D3L	DAVID Reactome	R-HSA-1430728~Metabolism	720009866	P06733, P31930, P08559, A8MXV4, P10515, P40926, P50570, Q04760, P35613, P15531, Q00796, Q02218, P42704, P60891, P54819, P62714, Q8NFF5, P04406, P52209, O75131, P00338, P16152, P30084, P00374, Q99714, P00492, P13804, P04899, P31153, P31350, P12277, O00763, P15104, Q96T21, P42765, O00170, P04181, P31040, Q9UBQ7, P04183, Q99707, P11908, P63027, P53992, Q9NVE7, P49591, P19367, Q9Y617, P34896, P16885,…	57	188	2118	10946	20.7273	1.56692	0.000186736	0.000300957	0.220834	0.0470402	0.0356419	3.4868	0.0601098
Reactome_N D3L	DAVID Reactome	R-HSA-379726~Mitochondrial tRNA aminoacylation	720010618	Q9NP81, Q6PI48, P41250, Q9NSE4, Q9BW92	5	188	21	10946	1.81818	13.8627	2.30608e-05	0.000393165	0.278193	0.153456	0.0407417	3.98571	0.0785229
Reactome_N D3L	DAVID Reactome	R-HSA-5653656~Vesicle-mediated transport	720011168	P50395, P50570, Q9UNF0, O95295, Q86YS7, Q8WXE9, Q5T0N5, Q9NSK0, P63261, P61981, Q99961, Q00610, O15511, Q9H0B6, Q9BVK6, P63027, Q147X3, Q14671, P53992, Q12756, P14625, Q9Y4L1, Q96QF0, P04350, P27797	25	188	673	10946	9.09091	2.16283	0.000211294	0.000477779	0.32711	0.05306	0.0440087	4.30532	0.0954179
Reactome_N D63G	DAVID Reactome	R-HSA-1428517~The citric acid (TCA) cycle and respiratory electron transport	720009865	P48163, O75947, P31930, P08559, P36957, P10515, P40926, Q12931, P11177, P35613, P38117, P21912, Q02218, P42704, P00338, P31040, P22695, P21796, P06576	19	167	178	10946	7.63052	6.99637	2.35964e-11	1.81671e-10	1.28441e-07	6.08789e-09	1.28441e-07	1.23536e-05	3.62828e-08
Reactome_N D63G	DAVID Reactome	R-HSA-71406~Pyruvate metabolism and Citric Acid (TCA) cycle	720011471	P21912, P48163, Q02218, P08559, P36957, P00338, P10515, P40926, P31040, P11177, P35613, P21796	12	167	55	10946	4.81928	14.3007	2.65846e-11	4.70543e-10	3.32674e-07	9.60237e-08	1.66337e-07	1.59985e-05	9.39757e-08
Reactome_N D63G	DAVID Reactome	R-HSA-1430728~Metabolism	720009866	Q9Y3U8, P06733, P31930, O75947, P08559, A8MXV4, P10515, P40926, O75223, P35613, P30520, P15531, Q00796, Q02218, P42704, P54819, P22695, P24752, P48163, Q9Y315, P04406, P52209, P11177, O75131, P38117, P00338, P16152, P30084, P00374, Q99714, Q9NZL9, P00492, P04899, Q8TEM1, P12277, O00763, P15104, Q96T21, P42765, O00170, P04181, P31040, Q9UBQ7, Q99707, P48506, Q9NVE7, P36957, Q12931, P18077, Q9Y617,…	62	167	2118	10946	24.8996	1.91869	5.20494e-08	1.02305e-07	7.23273e-05	1.34286e-05	2.411e-05	0.00231892	2.04322e-05
Reactome_N D63G	DAVID Reactome	R-HSA-8948700~Competing endogenous RNAs (ceRNAs) regulate PTEN translation	720011697	Q9HCE1, Q9H9G7, Q9UL18, Q9UPQ9, Q8NDV7	5	167	8	10946	2.00803	40.9656	4.20219e-08	3.40606e-06	0.00240519	0.000747795	0.000602022	0.0579031	0.000680249
Reactome_N D63G	DAVID Reactome	R-HSA-70268~Pyruvate metabolism	720011453	P48163, P08559, P00338, P10515, P11177, P35613, P21796	7	167	31	10946	2.81124	14.8005	3.27758e-07	5.9761e-06	0.0042162	0.00228056	0.0006119	0.0588532	0.00119353
Reactome_N D63G	DAVID Reactome	R-HSA-9768778~Regulation of NPAS4 mRNA translation	720012266	Q9HCE1, Q9H9G7, Q9UL18, Q9UPQ9, Q8NDV7	5	167	9	10946	2.00803	36.4138	9.33837e-08	6.05842e-06	0.00427416	0.00163698	0.0006119	0.0588532	0.00120997
Reactome_N D63G	DAVID Reactome	R-HSA-8943723~Regulation of PTEN mRNA translation	720011694	Q9HCE1, Q9H9G7, Q9UL18, Q9UPQ9, Q8NDV7	5	167	9	10946	2.00803	36.4138	9.33837e-08	6.05842e-06	0.00427416	0.00163698	0.0006119	0.0588532	0.00120997
Reactome_N D63G	DAVID Reactome	R-HSA-9634815~Transcriptional Regulation by NPAS4	720011957	Q9HCE1, Q9Y5V3, Q9H9G7, Q9UL18, Q00535, Q9UPQ9, Q8NDV7	7	167	34	10946	2.81124	13.4945	6.45197e-07	1.05127e-05	0.00740494	0.00282584	0.000929057	0.0893577	0.00209955
Reactome_N D63G	DAVID Reactome	R-HSA-9768759~Regulation of NPAS4 gene expression	720012264	Q9HCE1, Q9H9G7, Q9UL18, Q9UPQ9, Q8NDV7	5	167	13	10946	2.00803	25.2096	9.07704e-07	3.27834e-05	0.0229117	0.0107148	0.002467	0.237279	0.00654732
Reactome_N D63G	DAVID Reactome	R-HSA-379724~tRNA Aminoacylation	720010617	Q9NP81, Q6PI48, P49589, P49588, O43776, Q9NSE4, Q9BW92	7	167	42	10946	2.81124	10.9242	2.92002e-06	3.70916e-05	0.0258834	0.0104917	0.002467	0.237279	0.0074077
Reactome_N D63G	DAVID Reactome	R-HSA-901042~Calnexin/calreticulin cycle	720011774	Q9NYU2, Q14697, P27824, P14314, P30101, P27797	6	167	26	10946	2.40964	15.1257	2.06071e-06	3.83833e-05	0.0267726	0.00794325	0.002467	0.237279	0.00766568
Reactome_N D63G	DAVID Reactome	R-HSA-71291~Metabolism of amino acids and derivatives	720011466	Q9Y3U8, P08559, P36957, P10515, P18077, P12277, P11177, P15104, P34896, Q9Y617, Q96T21, Q02218, P04181, P30084, Q9UBQ7, Q99707, P24752, Q99714	18	167	376	10946	7.22892	3.13779	1.68292e-05	5.5584e-05	0.0385368	0.00433256	0.00327482	0.314976	0.0111008
Reactome_N D63G	DAVID Reactome	R-HSA-389661~Glyoxylate metabolism and glycine degradation	720010660	Q02218, P08559, P36957, P10515, Q9UBQ7, P11177	6	167	31	10946	2.40964	12.6861	6.1866e-06	9.32515e-05	0.0638054	0.0421806	0.00507145	0.487777	0.0186231
Reactome_N D63G	DAVID Reactome	R-HSA-8934593~Regulation of RUNX1 Expression and Activity	720011668	Q9HCE1, Q9H9G7, Q9UL18, Q9UPQ9, Q8NDV7	5	167	17	10946	2.00803	19.2779	4.15342e-06	0.000104069	0.0709387	0.0368109	0.00525548	0.505478	0.0207833
Reactome_N D63G	DAVID Reactome	R-HSA-426496~Post-transcriptional silencing by small RNAs	720010768	Q9H9G7, Q9UL18, Q9UPQ9, Q8NDV7	4	167	7	10946	1.60643	37.4542	1.76532e-06	0.000114646	0.0778613	0.0274002	0.00540367	0.519731	0.0228956
Reactome_N D63G	DAVID Reactome	R-HSA-532668~N-glycan trimming in the ER and Calnexin/Calreticulin cycle	720010950	Q9NYU2, Q14697, P27824, P14314, P30101, P27797	6	167	35	10946	2.40964	11.2363	1.29668e-05	0.000169654	0.11304	0.0425587	0.00749658	0.721029	0.03388
Reactome_N D63G	DAVID Reactome	R-HSA-8853884~Transcriptional Regulation by VENTX	720011618	Q9HCE1, Q9H9G7, Q9UL18, Q04206, Q9UPQ9, Q8NDV7	6	167	39	10946	2.40964	10.0838	2.4781e-05	0.000286534	0.183402	0.055918	0.0118414	1.13891	0.0572176
Reactome_N D63G	DAVID Reactome	R-HSA-71403~Citric acid cycle (TCA cycle)	720011470	P21912, Q02218, P36957, P40926, P31040	5	167	22	10946	2.00803	14.8966	1.66158e-05	0.000301477	0.191987	0.124442	0.0118414	1.13891	0.0602013
Reactome_N D63G	DAVID Reactome	R-HSA-5628897~TP53 Regulates Metabolic Genes	720011147	Q9HCE1, P31946, P61981, Q9H9G7, P42704, Q9UL18, Q9UPQ9, Q8NDV7	8	167	87	10946	3.21285	6.02712	5.2112e-05	0.000343176	0.215467	0.0650164	0.0127698	1.22821	0.0685265
Reactome_N D63G	DAVID Reactome	R-HSA-163200~Respiratory electron transport, ATP synthesis by chemiosmotic coupling, and heat production by uncoupling proteins.	720009961	P21912, P31930, O75947, P42704, Q12931, P31040, P22695, P38117, P06576	9	167	127	10946	3.61446	4.64491	0.000137299	0.000686649	0.384689	0.0348054	0.0242731	2.33461	0.137089
Reactome_N D63G	DAVID Reactome	R-HSA-2262752~Cellular responses to stress	720010418	Q9Y3U8, P49840, Q9UL18, O95757, Q8TEM1, P30048, Q15084, P42704, P48506, P48163, P31948, Q9UPQ9, P14625, P52209, P18077, Q8NDV7, P68371, Q9Y4L1, Q9HCE1, P20700, Q9H9G7, Q04206, P49748, P27797, Q99615	25	167	789	10946	10.0402	2.07683	0.00037071	0.000803111	0.433358	0.0912278	0.0270381	2.60055	0.160331
Reactome_N D63G	DAVID Reactome	R-HSA-8953897~Cellular responses to stimuli	720011713	Q9Y3U8, P49840, Q9UL18, O95757, Q8TEM1, P30048, Q15084, P42704, P48506, P48163, P31948, Q9UPQ9, P14625, P52209, P18077, Q8NDV7, P68371, Q9Y4L1, Q9HCE1, P20700, Q9H9G7, Q04206, P49748, P27797, Q99615	25	167	803	10946	10.0402	2.04063	0.000481834	0.0010259	0.516005	0.116923	0.0329686	3.17095	0.204785
Reactome_N D63G	DAVID Reactome	R-HSA-2559585~Oncogene Induced Senescence	720010454	Q9HCE1, Q9H9G7, Q9UL18, Q9UPQ9, Q8NDV7	5	167	33	10946	2.00803	9.93105	0.000130748	0.00148127	0.649374	0.554984	0.0436358	4.19694	0.295618
Reactome_N D63G	DAVID Reactome	R-HSA-9022692~Regulation of MECP2 expression and activity	720011828	Q9HCE1, Q9H9G7, Q9UL18, Q9UPQ9, Q8NDV7	5	167	33	10946	2.00803	9.93105	0.000130748	0.00148127	0.649374	0.554984	0.0436358	4.19694	0.295618
Reactome_N D63G	DAVID Reactome	R-HSA-72766~Translation	720011493	Q9Y3U8, Q9NP81, P82909, P11940, P18077, O43776, Q8IXM3, Q9BW92, Q6PI48, P49589, P49588, Q9NSE4, P43897	13	167	292	10946	5.22088	2.9181	0.000527039	0.00162848	0.684082	0.127168	0.0451161	4.33931	0.324972
Reactome_N D63G	DAVID Reactome	R-HSA-70263~Gluconeogenesis	720011452	P06733, P04406, P00558, P40926, P04075	5	167	34	10946	2.00803	9.63896	0.000151415	0.00165915	0.690869	0.485293	0.0451161	4.33931	0.331087
Reactome_N P80R	DAVID Reactome	R-HSA-72766~Translation	720011493	Q9Y3U8, P62917, Q12904, Q8IXM3, P18124, Q9NWU5, Q9UHB9, P62277, Q6PI48, P41252, Q9P2J5, P39023, P41250, P62910, P83731, P62913, P62753, P82912, Q07020, P82914, P04843, P49411, P36578, Q9Y3B7, P84098, Q8TAE8, P62241, Q9UI10, P61313, P46776, P05387, P62841, P27635, P46778, P62249, Q9NP81, P82909, Q5T653, P42766, P50914, P40429, P47897, P61619, P26373, P62829, P18077, O76094, P62266, P15880, Q02543,…	55	240	292	10946	17.2956	8.59061	1.75009e-36	1.80428e-35	1.27382e-32	4.51524e-34	1.27382e-32	1.12767e-30	3.60345e-33
Reactome_N P80R	DAVID Reactome	R-HSA-72312~rRNA processing	720011482	Q9Y3U8, Q8IY81, P62917, P18124, Q9H583, Q8TED0, P42766, P62277, P50914, P39023, P62910, P40429, P83731, P62913, Q99848, P62753, P56182, Q07020, Q9UNQ2, P46087, P26373, P62829, Q13601, P36578, P18077, Q8IY37, Q9Y2P8, Q96EU6, O75691, P62266, P84098, Q9NW13, P15880, Q02543, P62263, P62241, P62701, P61313, P62841, P46776, Q9NXF1, P05387, P27635, P62424, P46778, P62249, Q99714	47	240	205	10946	14.7799	10.4565	3.09212e-35	4.07769e-34	2.87885e-31	2.3933e-32	1.41607e-31	1.25361e-29	8.14384e-32
Reactome_N P80R	DAVID Reactome	R-HSA-8868773~rRNA processing in the nucleus and cytosol	720011644	Q9Y3U8, Q8IY81, P62917, P18124, Q9H583, Q8TED0, P42766, P62277, P50914, P39023, P62910, P40429, P83731, P62913, Q99848, P62753, P56182, Q07020, Q9UNQ2, P46087, P26373, P62829, Q13601, P36578, P18077, Q8IY37, Q9Y2P8, Q96EU6, O75691, P62266, P84098, Q9NW13, P15880, Q02543, P62263, P62241, P62701, P61313, P62841, P46776, Q9NXF1, P05387, P27635, P62424, P46778, P62249	46	240	195	10946	14.4654	10.7589	4.39824e-35	6.0173e-34	4.24822e-31	1.13475e-32	1.41607e-31	1.25361e-29	1.20176e-31
Reactome_N P80R	DAVID Reactome	R-HSA-6791226~Major pathway of rRNA processing in the nucleolus and cytosol	720011341	Q9Y3U8, Q8IY81, P62917, P18124, Q9H583, Q8TED0, P42766, P62277, P50914, P39023, P62910, P40429, P83731, P62913, Q99848, P62753, P56182, Q07020, P26373, P62829, Q13601, P36578, P18077, Q8IY37, Q9Y2P8, Q96EU6, O75691, P62266, P84098, Q9NW13, P15880, Q02543, P62263, P62241, P62701, P61313, P62841, P46776, Q9NXF1, P05387, P27635, P62424, P46778, P62249	44	240	185	10946	13.8365	10.8474	1.01831e-33	1.40767e-32	9.93816e-30	7.88173e-31	2.48454e-30	2.19949e-28	2.81136e-30
Reactome_N P80R	DAVID Reactome	R-HSA-168255~Influenza Infection	720010045	Q9Y3U8, P62917, Q8TEM1, Q12849, P18124, P42766, P62277, P50914, P39023, Q00610, P62910, P40429, P83731, P27824, P62913, P62753, Q07020, P26373, P62829, P36578, P18077, Q8N1F7, O00410, P62266, P84098, P15880, Q02543, P62263, P62241, P62701, Q92621, Q5SRE5, P61313, P62841, P46776, P05387, P27635, P27797, P62424, P46778, P62249	41	240	157	10946	12.8931	11.9105	3.29667e-33	5.15383e-32	3.63861e-29	1.70108e-30	7.27721e-30	6.44229e-28	1.02931e-29
Reactome_N P80R	DAVID Reactome	R-HSA-2408522~Selenoamino acid metabolism	720010424	Q9Y3U8, P62917, Q12904, P18124, P42766, P62277, P50914, Q9P2J5, P41252, P39023, P62910, P40429, P47897, P83731, P62913, P62753, Q07020, P26373, P62829, P36578, P18077, P62266, P84098, P15880, Q02543, P62263, P62241, P62701, P61313, P62841, P46776, P05387, P27635, P56192, P62424, P46778, P62249	37	240	119	10946	11.6352	14.1807	4.26027e-33	8.47261e-32	5.98166e-29	3.29745e-30	9.96943e-30	8.82563e-28	1.69212e-29
Reactome_N P80R	DAVID Reactome	R-HSA-1799339~SRP-dependent cotranslational protein targeting to membrane	720010133	Q9Y3U8, P62917, P18124, Q9UHB9, P42766, P62277, P50914, P39023, P62910, P40429, P83731, P62913, P62753, P61619, Q07020, P04843, P26373, P62829, P36578, P18077, O76094, P62266, P84098, P15880, Q02543, P62263, P62241, P62701, P61313, P62841, P46776, P05387, P27635, P62424, P46778, P62249	36	240	113	10946	11.3208	14.5301	1.20582e-32	2.48282e-31	1.75287e-28	2.4888e-29	2.5041e-29	2.2168e-27	4.95862e-29
Reactome_N P80R	DAVID Reactome	R-HSA-192823~Viral mRNA Translation	720010210	Q9Y3U8, P62917, Q12849, P18124, P42766, P62277, P50914, P39023, P62910, P40429, P83731, P62913, P62753, Q07020, P26373, P62829, P36578, P18077, P62266, P84098, P15880, Q02543, P62263, P62241, P62701, P61313, P62841, P46776, P05387, P27635, P62424, P46778, P62249	33	240	90	10946	10.3774	16.7231	2.63612e-32	6.69125e-31	4.72403e-28	4.76083e-29	5.90503e-29	5.22754e-27	1.33636e-28
Reactome_N P80R	DAVID Reactome	R-HSA-168273~Influenza Viral RNA Transcription and Replication	720010050	Q9Y3U8, P62917, Q8TEM1, Q12849, P18124, P42766, P62277, P50914, P39023, P62910, P40429, P83731, P62913, P62753, Q07020, P26373, P62829, P36578, P18077, Q8N1F7, O00410, P62266, P84098, P15880, Q02543, P62263, P62241, P62701, Q92621, Q5SRE5, P61313, P62841, P46776, P05387, P27635, P62424, P46778, P62249	38	240	136	10946	11.9497	12.7435	5.14616e-32	8.81228e-31	6.22147e-28	3.98313e-29	6.91274e-29	6.11964e-27	1.75996e-28
Reactome_N P80R	DAVID Reactome	R-HSA-975956~Nonsense Mediated Decay (NMD) independent of the Exon Junction Complex (EJC)	720012258	Q9Y3U8, P62917, P18124, P42766, P62277, P50914, P39023, P62910, P40429, P83731, P62913, P62753, Q07020, P26373, P62829, P36578, P18077, P62266, P84098, P15880, Q02543, P62263, P62241, P62701, P61313, Q92900, P62841, P46776, P05387, P27635, P62424, P46778, P62249	33	240	96	10946	10.3774	15.6779	3.20427e-31	7.37088e-30	5.20384e-27	4.13351e-28	5.20384e-28	4.6068e-26	1.47209e-27
Reactome_N P80R	DAVID Reactome	R-HSA-156902~Peptide chain elongation	720009921	Q9Y3U8, P62917, P18124, P42766, P62277, P50914, P39023, P62910, P40429, P83731, P62913, P62753, Q07020, P26373, P62829, P36578, P18077, P62266, P84098, P15880, Q02543, P62263, P62241, P62701, P61313, P62841, P46776, P05387, P27635, P62424, P46778, P62249	32	240	90	10946	10.0629	16.2163	7.67886e-31	1.85802e-29	1.31176e-26	1.3868e-27	1.19251e-27	1.05569e-25	3.71079e-27
Reactome_N P80R	DAVID Reactome	R-HSA-2408557~Selenocysteine synthesis	720010427	Q9Y3U8, P62917, P18124, P42766, P62277, P50914, P39023, P62910, P40429, P83731, P62913, P62753, Q07020, P26373, P62829, P36578, P18077, P62266, P84098, P15880, Q02543, P62263, P62241, P62701, P61313, P62841, P46776, P05387, P27635, P62424, P46778, P62249	32	240	94	10946	10.0629	15.5262	3.88508e-30	8.80371e-29	6.21542e-26	8.0188e-27	4.43959e-27	3.93023e-25	1.75825e-26
Reactome_N P80R	DAVID Reactome	R-HSA-156842~Eukaryotic Translation Elongation	720009920	Q9Y3U8, P62917, P18124, P42766, P62277, P50914, P39023, P62910, P40429, P83731, P62913, P62753, Q07020, P26373, P62829, P36578, P18077, P62266, P84098, P15880, Q02543, P62263, P62241, P62701, P61313, P62841, P46776, P05387, P27635, P62424, P46778, P62249	32	240	94	10946	10.0629	15.5262	3.88508e-30	8.80371e-29	6.21542e-26	8.0188e-27	4.43959e-27	3.93023e-25	1.75825e-26
Reactome_N P80R	DAVID Reactome	R-HSA-72764~Eukaryotic Translation Termination	720011492	Q9Y3U8, P62917, P18124, P42766, P62277, P50914, P39023, P62910, P40429, P83731, P62913, P62753, Q07020, P26373, P62829, P36578, P18077, P62266, P84098, P15880, Q02543, P62263, P62241, P62701, P61313, P62841, P46776, P05387, P27635, P62424, P46778, P62249	32	240	94	10946	10.0629	15.5262	3.88508e-30	8.80371e-29	6.21542e-26	8.0188e-27	4.43959e-27	3.93023e-25	1.75825e-26
Reactome_N P80R	DAVID Reactome	R-HSA-9633012~Response of EIF2AK4 (GCN2) to amino acid deficiency	720011951	Q9Y3U8, P62917, P18124, P42766, P62277, P50914, P39023, P62910, P40429, P83731, P62913, P62753, Q07020, P26373, P62829, P36578, P18077, P62266, P84098, P15880, Q02543, P62263, P62241, P62701, P61313, P62841, P46776, P05387, P27635, P62424, P46778, P62249	32	240	102	10946	10.0629	14.3085	7.73e-29	1.55427e-27	1.09732e-24	7.97736e-26	6.85823e-26	6.07138e-24	3.10415e-25
Reactome_N P80R	DAVID Reactome	R-HSA-72689~Formation of a pool of free 40S subunits	720011486	Q9Y3U8, P62917, P18124, P42766, P62277, P50914, P39023, P62910, P40429, P83731, P62913, P62753, Q07020, P26373, P62829, P36578, P18077, P62266, P84098, P15880, Q02543, P62263, P62241, P62701, P61313, P62841, P46776, P05387, P27635, P62424, P46778, P62249	32	240	102	10946	10.0629	14.3085	7.73e-29	1.55427e-27	1.09732e-24	7.97736e-26	6.85823e-26	6.07138e-24	3.10415e-25
Reactome_N P80R	DAVID Reactome	R-HSA-927802~Nonsense-Mediated Decay (NMD)	720011890	Q9Y3U8, P62917, P18124, P42766, P62277, P50914, P39023, P62910, P40429, P83731, P62913, P62753, Q07020, P26373, P62829, P36578, P18077, P62266, P84098, P15880, Q02543, P62263, P62241, P62701, P61313, Q92900, P62841, P46776, P05387, P27635, P62424, P46778, P62249	33	240	116	10946	10.3774	12.9748	3.74651e-28	6.56626e-27	4.63578e-24	4.83299e-25	2.57543e-25	2.27995e-23	1.31139e-24
Reactome_N P80R	DAVID Reactome	R-HSA-975957~Nonsense Mediated Decay (NMD) enhanced by the Exon Junction Complex (EJC)	720012259	Q9Y3U8, P62917, P18124, P42766, P62277, P50914, P39023, P62910, P40429, P83731, P62913, P62753, Q07020, P26373, P62829, P36578, P18077, P62266, P84098, P15880, Q02543, P62263, P62241, P62701, P61313, Q92900, P62841, P46776, P05387, P27635, P62424, P46778, P62249	33	240	116	10946	10.3774	12.9748	3.74651e-28	6.56626e-27	4.63578e-24	4.83299e-25	2.57543e-25	2.27995e-23	1.31139e-24
Reactome_N P80R	DAVID Reactome	R-HSA-72613~Eukaryotic Translation Initiation	720011483	Q9Y3U8, P62917, P18124, P42766, P62277, P50914, P39023, P62910, P40429, P83731, P62913, P62753, Q07020, P26373, P62829, P36578, P18077, P62266, P84098, P15880, Q02543, P62263, P62241, P62701, Q9UI10, P61313, P62841, P46776, P05387, P27635, P62424, P46778, P62249	33	240	120	10946	10.3774	12.5423	1.2799e-27	2.14124e-26	1.51171e-23	9.90645e-25	7.55857e-25	6.69137e-23	4.27642e-24
Reactome_N P80R	DAVID Reactome	R-HSA-72737~Cap-dependent Translation Initiation	720011491	Q9Y3U8, P62917, P18124, P42766, P62277, P50914, P39023, P62910, P40429, P83731, P62913, P62753, Q07020, P26373, P62829, P36578, P18077, P62266, P84098, P15880, Q02543, P62263, P62241, P62701, Q9UI10, P61313, P62841, P46776, P05387, P27635, P62424, P46778, P62249	33	240	120	10946	10.3774	12.5423	1.2799e-27	2.14124e-26	1.51171e-23	9.90645e-25	7.55857e-25	6.69137e-23	4.27642e-24
Reactome_N P80R	DAVID Reactome	R-HSA-156827~L13a-mediated translational silencing of Ceruloplasmin expression	720009919	Q9Y3U8, P62917, P18124, P42766, P62277, P50914, P39023, P62910, P40429, P83731, P62913, P62753, Q07020, P26373, P62829, P36578, P18077, P62266, P84098, P15880, Q02543, P62263, P62241, P62701, P61313, P62841, P46776, P05387, P27635, P62424, P46778, P62249	32	240	112	10946	10.0629	13.031	2.18899e-27	3.85802e-26	2.72376e-23	2.25903e-24	1.29703e-24	1.14822e-22	7.70513e-24
Reactome_N P80R	DAVID Reactome	R-HSA-72706~GTP hydrolysis and joining of the 60S ribosomal subunit	720011489	Q9Y3U8, P62917, P18124, P42766, P62277, P50914, P39023, P62910, P40429, P83731, P62913, P62753, Q07020, P26373, P62829, P36578, P18077, P62266, P84098, P15880, Q02543, P62263, P62241, P62701, P61313, P62841, P46776, P05387, P27635, P62424, P46778, P62249	32	240	113	10946	10.0629	12.9156	2.99514e-27	5.21447e-26	3.68142e-23	6.18197e-24	1.67337e-24	1.48138e-22	1.04142e-23
Reactome_N P80R	DAVID Reactome	R-HSA-71291~Metabolism of amino acids and derivatives	720011466	Q9Y3U8, P08559, P10515, P62917, Q12904, P18124, P12694, P42766, Q02218, P62277, Q96RQ3, P50914, Q9P2J5, P41252, P39023, P62910, P40429, P47897, Q9UJS0, P83731, P62913, P62753, P24752, P54886, Q07020, P26373, P62829, P36578, P18077, P11177, Q9HCC0, P62266, P84098, P15880, Q02543, P62263, P62241, P62701, P61313, P62841, P46776, P05387, P27635, P56192, P62424, P46778, P62249, Q99714	48	240	376	10946	15.0943	5.82234	6.34123e-24	4.12739e-23	2.91394e-20	1.63604e-21	1.26693e-21	1.12157e-19	8.2431e-21
Reactome_N P80R	DAVID Reactome	R-HSA-9711097~Cellular response to starvation	720012189	Q9Y3U8, P62917, P18124, P42766, P62277, P50914, P39023, P62910, P40429, P83731, P62913, P62753, Q07020, P26373, P62829, P36578, P18077, Q9UHA4, P62266, P84098, P15880, Q02543, P62263, P62241, P62701, P61313, P62841, P46776, P05387, P27635, P62424, P46778, P62249	33	240	157	10946	10.3774	9.58646	1.53559e-23	1.80857e-22	1.27685e-19	7.92364e-21	5.32021e-21	4.70982e-19	3.61203e-20
Reactome_N P80R	DAVID Reactome	R-HSA-9010553~Regulation of expression of SLITs and ROBOs	720011775	Q9Y3U8, P62917, P18124, P42766, P62277, P50914, P39023, P62910, P40429, P83731, P62913, P62753, Q07020, P26373, P62829, P36578, P18077, O43347, P62266, P84098, P15880, Q02543, P62263, P62241, P62701, P61313, P62841, P46776, P05387, P27635, P62424, P46778, P62249	33	240	172	10946	10.3774	8.75044	3.27265e-22	3.44145e-21	2.42966e-18	8.44343e-20	9.71866e-20	8.60363e-18	6.87317e-19
Reactome_N P80R	DAVID Reactome	R-HSA-392499~Metabolism of proteins	720010689	Q14204, P18085, P62917, Q8IXM3, P18124, P14314, Q9NYU2, P41252, Q9P2J5, P41250, Q8NBJ4, P62910, P83731, P62913, P62753, P82912, Q13885, Q07065, P82914, Q14697, P49411, Q9Y673, P36578, Q86VP6, Q01082, Q9Y3B7, P84098, Q8TAE8, Q9Y3B3, P62241, Q9UI10, P61313, P46776, P27635, P46778, P62249, Q8TEM1, P30101, P40429, P49755, Q93008, P61619, P26373, P62829, P18077, Q8N1F7, O75352, P68371, P62266, P15880,…	104	240	1970	10946	32.7044	2.40775	2.25708e-20	5.60909e-20	3.96002e-17	5.82327e-18	1.52308e-18	1.34834e-16	1.12023e-17
Reactome_N P80R	DAVID Reactome	R-HSA-376176~Signaling by ROBO receptors	720010607	Q9Y3U8, P62917, P18124, P42766, P62277, P50914, P39023, P62910, P40429, P83731, P62913, P62753, Q07020, P26373, P62829, P36578, P18077, O43347, P62266, P84098, P15880, Q02543, P62263, P62241, P62701, P61313, P62841, P46776, P05387, P27635, P62424, P46778, P62249	33	240	219	10946	10.3774	6.87249	8.00392e-19	6.30132e-18	4.44874e-15	2.06501e-16	1.64768e-16	1.45864e-14	1.25848e-15
Reactome_N P80R	DAVID Reactome	R-HSA-8953854~Metabolism of RNA	720011712	Q9Y3U8, O43592, P62917, P18124, P62277, P39023, Q92973, P62910, P83731, P62913, P62753, Q99848, Q07020, Q13601, P36578, Q9Y2P8, O75691, P84098, Q9NW13, P62241, P61313, P46776, P05387, P62841, P27635, P46778, P62249, Q99714, Q8IY81, Q8TEM1, Q9H583, Q8TED0, P42766, P50914, P40429, P56182, Q9UNQ2, P46087, P26373, P62829, P18077, Q8N1F7, Q8IY37, Q96QD9, Q96EU6, P62266, P15880, Q02543, P62263, P62701,…	57	240	716	10946	17.9245	3.63083	2.98494e-18	1.15007e-17	8.11948e-15	7.70115e-16	2.89981e-16	2.56712e-14	2.29688e-15
Reactome_N P80R	DAVID Reactome	R-HSA-5663205~Infectious disease	720011233	Q9Y3U8, Q14204, P04439, P62917, P18124, P14314, O00468, P51149, P62277, P39023, P62910, P83731, P27824, P62913, P62753, Q14573, Q07020, Q13885, Q14697, P04843, P49411, P36578, P10321, P84098, P54709, P62241, P05141, P61313, P05023, P46776, P05387, P62841, P27635, P27797, P46977, P46778, P62249, P04899, Q8TEM1, Q12849, P12235, P42766, P50914, P61088, Q00610, P40429, P53992, P26373, P62829, P18077,…	62	240	960	10946	19.4969	2.94554	2.53076e-15	7.73533e-15	5.48672e-12	6.58806e-13	1.88315e-13	1.6671e-11	1.55431e-12
Reactome_N P80R	DAVID Reactome	R-HSA-1430728~Metabolism	720009866	P53004, Q9Y305, O75306, P08559, O75027, P10515, P62917, O43678, Q8IV08, P11166, P18124, P53007, Q02218, Q02978, P41252, Q9P2J5, P62910, Q13085, Q9UJS0, P83731, P46940, P62913, P62753, P24752, Q14573, P28331, P04406, Q9UI09, P36578, P11177, O75251, P84098, Q15392, P62241, P47985, P61313, P46776, P27635, P46778, P62249, Q8TEM1, O95299, P31040, P40429, P54886, P26373, P62829, P18077, Q8N1F7, P21912,…	98	240	2118	10946	30.8176	2.1103	7.4258e-15	1.62205e-14	1.14437e-11	1.91913e-12	3.81722e-13	3.37927e-11	3.24185e-12
Reactome_N P80R	DAVID Reactome	R-HSA-2262752~Cellular responses to stress	720010418	P53004, Q9Y3U8, P07305, Q13555, Q14204, P62917, P18124, P62277, P42704, P39023, P62910, P83731, P62913, P62753, Q07020, Q13885, P36578, Q9Y4L1, Q9HCE1, P84098, P62241, P61313, P46776, P05387, P62841, P27635, P27797, P46778, P62249, Q8TEM1, P42766, Q15084, P50914, P40429, Q13501, P26373, P62829, P14625, P18077, Q8N1F7, P68371, Q9UHA4, Q8TCT9, P62266, P20700, P15880, Q02543, P62263, P62701, Q92621,…	53	240	789	10946	16.6667	3.06368	9.1175e-14	2.94585e-13	2.07947e-10	2.35165e-11	6.70894e-12	5.93921e-10	5.88196e-11
Reactome_N P80R	DAVID Reactome	R-HSA-8953897~Cellular responses to stimuli	720011713	P53004, Q9Y3U8, P07305, Q13555, Q14204, P62917, P18124, P62277, P42704, P39023, P62910, P83731, P62913, P62753, Q07020, Q13885, P36578, Q9Y4L1, Q9HCE1, P84098, P62241, P61313, P46776, P05387, P62841, P27635, P27797, P46778, P62249, Q8TEM1, P42766, Q15084, P50914, P40429, Q13501, P26373, P62829, P14625, P18077, Q8N1F7, P68371, Q9UHA4, Q8TCT9, P62266, P20700, P15880, Q02543, P62263, P62701, Q92621,…	53	240	803	10946	16.6667	3.01026	1.85574e-13	5.8847e-13	4.15423e-10	4.78637e-11	1.29831e-11	1.14935e-09	1.17517e-10
Reactome_N P80R	DAVID Reactome	R-HSA-1643685~Disease	720009979	Q9Y3U8, Q13555, Q14204, P04439, P62917, P11166, P18124, P35613, P14314, O00468, P51149, P62277, Q96RQ3, P39023, P62910, Q13085, P83731, P46940, P27824, P62913, P62753, O94905, Q14573, Q07020, Q13885, Q14697, P04843, P49411, P36578, Q01082, P10321, P84095, P84098, P54709, P62241, P05141, P61313, P05023, P46776, P05387, P62841, P27635, P27797, P46977, P46778, P62249, P04899, Q14789, Q8TEM1, Q12849,…	81	240	1748	10946	25.4717	2.11343	5.62995e-12	1.22821e-11	8.67122e-09	1.45252e-09	2.62763e-10	2.32616e-08	2.45296e-09
Reactome_N P80R	DAVID Reactome	R-HSA-422475~Axon guidance	720010756	Q9Y3U8, P62917, P18124, O00468, P42766, P62277, P50914, P39023, Q00610, P62910, P40429, P83731, P62913, P62753, Q07020, Q13885, P26373, P62829, P36578, P18077, O43347, Q01082, P68371, P62266, P84098, P15880, Q02543, P62263, P62241, P62701, P61313, P62841, P46776, P05387, P27635, P62424, P46778, P62249	38	240	553	10946	11.9497	3.13403	2.67162e-10	8.85827e-10	6.25393e-07	6.89278e-08	1.83939e-08	1.62836e-06	1.76915e-07
Reactome_N P80R	DAVID Reactome	R-HSA-9675108~Nervous system development	720012086	Q9Y3U8, P62917, P18124, O00468, P42766, P62277, P50914, P39023, Q00610, P62910, P40429, P83731, P62913, P62753, Q07020, Q13885, P26373, P62829, P36578, P18077, O43347, Q01082, P68371, P62266, P84098, P15880, Q02543, P62263, P62241, P62701, P61313, P62841, P46776, P05387, P27635, P62424, P46778, P62249	38	240	578	10946	11.9497	2.99847	9.47785e-10	3.00404e-09	2.12085e-06	2.44528e-07	6.05958e-08	5.36436e-06	5.99958e-07
Reactome_N P80R	DAVID Reactome	R-HSA-9694516~SARS-CoV-2 Infection	720012126	P04439, Q8TEM1, P14314, O00468, P62277, P61088, P27824, P62753, P53992, Q14697, P04843, P49411, Q8N1F7, P10321, P62266, P15880, P62263, P62241, P62701, Q92621, Q5SRE5, O14893, P62841, P46977, P62249	25	240	299	10946	7.86164	3.81341	8.64379e-09	3.53267e-08	2.49403e-05	4.46018e-06	6.92796e-07	6.13311e-05	7.05535e-06
Reactome_N P80R	DAVID Reactome	R-HSA-1428517~The citric acid (TCA) cycle and respiratory electron transport	720009865	O75306, P08559, P28331, P10515, Q9UI09, Q12931, O43678, P36542, P11177, O95299, P35613, O75251, P21912, Q02218, P42704, P31040, P49821, P47985, P21796	19	240	178	10946	5.97484	4.86831	1.16276e-08	6.21653e-08	4.38877e-05	2.99992e-06	1.18618e-06	0.000105009	1.24155e-05
Reactome_N P80R	DAVID Reactome	R-HSA-6790901~rRNA modification in the nucleus and cytosol	720011339	Q8TED0, Q9UNQ2, P15880, P46087, P62263, Q13601, Q8IY37, Q9Y2P8, P62753, Q9H583, Q96EU6, O75691	12	240	61	10946	3.77358	8.97213	6.31732e-09	6.82563e-08	4.81878e-05	1.46687e-05	1.26813e-06	0.000112264	1.36319e-05
Reactome_N P80R	DAVID Reactome	R-HSA-9705683~SARS-CoV-2-host interactions	720012173	P53992, P49411, P04439, Q8TEM1, Q8N1F7, P10321, P62266, P62277, P15880, P61088, P62263, P62241, P62701, Q92621, O14893, Q5SRE5, P62841, P62753, P62249	19	240	203	10946	5.97484	4.26876	9.84908e-08	4.56136e-07	0.00032198	2.54103e-05	8.25723e-06	0.000730987	9.10981e-05
Reactome_N P80R	DAVID Reactome	R-HSA-446203~Asparagine N-linked glycosylation	720010831	Q13885, Q14204, P53992, P04843, Q14697, Q9Y673, P18085, Q14789, Q01082, P30101, P68371, O75396, P14314, O75352, Q9NYU2, Q9Y3B3, P49755, P27824, Q9BVK6, P62820, P27797, P46977, Q14165	23	240	304	10946	7.2327	3.45063	2.18978e-07	8.08343e-07	0.000570528	5.64946e-05	1.42673e-05	0.00126304	0.00016144
Reactome_N P80R	DAVID Reactome	R-HSA-9735869~SARS-CoV-1 modulates host translation machinery	720012221	P62266, P62277, P15880, P62263, P62241, P62701, P62841, P62753, P62249	9	240	37	10946	2.83019	11.0939	7.34405e-08	1.02656e-06	0.000724491	0.000322058	1.76769e-05	0.00156488	0.000205022
Reactome_N P80R	DAVID Reactome	R-HSA-9679506~SARS-CoV Infections	720012097	P04439, Q8TEM1, P14314, O00468, P62277, P61088, P27824, P62753, P53992, Q14697, P04843, P49411, Q8N1F7, P10321, P62266, P15880, P54709, P62263, P62241, P62701, Q92621, Q5SRE5, O14893, P05023, P62841, P46977, P62249	27	240	414	10946	8.49057	2.97446	3.77785e-07	1.18956e-06	0.000839476	9.74638e-05	1.99959e-05	0.00177018	0.000237575
Reactome_N P80R	DAVID Reactome	R-HSA-9754678~SARS-CoV-2 modulates host translation machinery	720012238	P62266, P62277, P15880, P62263, P62241, P62701, O14893, P62841, P62753, P62249	10	240	51	10946	3.14465	8.94281	1.2363e-07	1.32752e-06	0.000936793	0.000318915	2.17961e-05	0.00192954	0.000265129
Reactome_N P80R	DAVID Reactome	R-HSA-196780~Biotin transport and metabolism	720010246	Q96RQ3, Q13085, P05165, O00763, P05166, Q9HCC0	6	240	11	10946	1.88679	24.8773	4.40011e-08	1.9754e-06	0.00139366	0.00066956	3.16963e-05	0.00280597	0.000394522
Reactome_N P80R	DAVID Reactome	R-HSA-3371599~Defective HLCS causes multiple carboxylase deficiency	720010558	Q96RQ3, Q13085, P05165, P05166, Q9HCC0	5	240	7	10946	1.57233	32.5774	9.85147e-08	7.36808e-06	0.00518838	0.00154922	0.000115597	0.0102334	0.00147153
Reactome_N P80R	DAVID Reactome	R-HSA-3323169~Defects in biotin (Btn) metabolism	720010537	Q96RQ3, Q13085, P05165, P05166, Q9HCC0	5	240	8	10946	1.57233	28.5052	2.58008e-07	1.44835e-05	0.0101733	0.00458253	0.000218325	0.0193277	0.00289258
Reactome_N P80R	DAVID Reactome	R-HSA-611105~Respiratory electron transport	720011314	P21912, O75306, P42704, P28331, Q9UI09, Q12931, P31040, P49821, P47985, O43678, O95299, O75251	12	240	103	10946	3.77358	5.31359	2.45755e-06	1.45344e-05	0.0102089	0.00253298	0.000218325	0.0193277	0.00290275
Reactome_N P80R	DAVID Reactome	R-HSA-72695~Formation of the ternary complex, and subsequently, the 43S complex	720011487	P62266, P62277, P15880, P62263, P62241, P62701, P62841, P62753, P62249	9	240	52	10946	2.83019	7.89375	1.63067e-06	1.50853e-05	0.0105938	0.00629084	0.00022188	0.0196424	0.00301278
Reactome_N P80R	DAVID Reactome	R-HSA-163200~Respiratory electron transport, ATP synthesis by chemiosmotic coupling, and heat production by uncoupling proteins.	720009961	O75306, P28331, Q9UI09, Q12931, O43678, P36542, O95299, O75251, P21912, P42704, P31040, P49821, P47985	13	240	127	10946	4.08805	4.66857	4.06146e-06	2.08439e-05	0.0146082	0.00104731	0.000300323	0.0265866	0.00416285
Reactome_N P80R	DAVID Reactome	R-HSA-70326~Glucose metabolism	720011454	Q02978, P17858, P04406, Q8TEM1, Q92621, Q9UJS0, Q5SRE5, P04075, Q8N1F7, P19367, P53007	11	240	91	10946	3.45912	5.5131	4.519e-06	2.78442e-05	0.0194663	0.00697102	0.00039316	0.0348052	0.00556089
Reactome_N P80R	DAVID Reactome	R-HSA-379724~tRNA Aminoacylation	720010617	Q9NP81, Q6PI48, P41252, Q9P2J5, P41250, P47897, Q12904, P56192	8	240	42	10946	2.51572	8.6873	2.9463e-06	3.04605e-05	0.0212758	0.0105856	0.000421669	0.037329	0.00608339
Reactome_N P80R	DAVID Reactome	R-HSA-72702~Ribosomal scanning and start codon recognition	720011488	P62266, P62277, P15880, P62263, P62241, P62701, P62841, P62753, P62249	9	240	59	10946	2.83019	6.9572	4.87322e-06	3.89724e-05	0.0271399	0.0199157	0.000519141	0.045958	0.00778329
Reactome_N P80R	DAVID Reactome	R-HSA-72649~Translation initiation complex formation	720011484	P62266, P62277, P15880, P62263, P62241, P62701, P62841, P62753, P62249	9	240	59	10946	2.83019	6.9572	4.87322e-06	3.89724e-05	0.0271399	0.0199157	0.000519141	0.045958	0.00778329
Reactome_N P80R	DAVID Reactome	R-HSA-72662~Activation of the mRNA upon binding of the cap-binding complex and eIFs, and subsequent binding to 43S	720011485	P62266, P62277, P15880, P62263, P62241, P62701, P62841, P62753, P62249	9	240	60	10946	2.83019	6.84125	5.62492e-06	4.41316e-05	0.0306772	0.0115427	0.00057698	0.0510783	0.00881365
Reactome_N P80R	DAVID Reactome	R-HSA-532668~N-glycan trimming in the ER and Calnexin/Calreticulin cycle	720010950	Q9NYU2, Q14697, P27824, P14314, P30101, P27797, Q14165	7	240	35	10946	2.20126	9.12167	8.8875e-06	9.71299e-05	0.0662785	0.0293689	0.0012468	0.110375	0.0193976
Reactome_N P80R	DAVID Reactome	R-HSA-5389840~Mitochondrial translation elongation	720010983	P82912, Q9NWU5, P82914, Q9Y3B7, Q8TAE8, P49411, P82909, Q8IXM3, Q5T653, Q16540	10	240	87	10946	3.14465	5.24234	1.93946e-05	0.000113114	0.0767573	0.0247089	0.00142605	0.126244	0.0225896
Reactome_N P80R	DAVID Reactome	R-HSA-379716~Cytosolic tRNA aminoacylation	720010616	P41252, Q9P2J5, P41250, P47897, Q12904, P56192	6	240	24	10946	1.88679	11.4021	1.00868e-05	0.000144035	0.096696	0.0726921	0.00178401	0.157933	0.0287642
Reactome_N P80R	DAVID Reactome	R-HSA-71406~Pyruvate metabolism and Citric Acid (TCA) cycle	720011471	P21912, Q02218, P08559, P10515, P31040, P11177, P35613, P21796	8	240	55	10946	2.51572	6.63394	2.37726e-05	0.000180039	0.119371	0.0822842	0.00219151	0.194007	0.0359536
Reactome_N P80R	DAVID Reactome	R-HSA-5368287~Mitochondrial translation	720010980	P82912, Q9NWU5, P82914, Q9Y3B7, Q8TAE8, P49411, P82909, Q8IXM3, Q5T653, Q16540	10	240	93	10946	3.14465	4.90412	3.49158e-05	0.000189385	0.125164	0.0353922	0.0022662	0.20062	0.0378198
Reactome_N P80R	DAVID Reactome	R-HSA-901042~Calnexin/calreticulin cycle	720011774	Q9NYU2, Q14697, P27824, P14314, P30101, P27797	6	240	26	10946	1.88679	10.525	1.66305e-05	0.000215107	0.14091	0.0623333	0.00253109	0.224069	0.0429558
Reactome_N P80R	DAVID Reactome	R-HSA-9678108~SARS-CoV-1 Infection	720012093	P62266, P62277, Q14697, P15880, P62263, P62241, P62701, P27824, P62841, P62753, P14314, P62249	12	240	142	10946	3.77358	3.85423	6.58194e-05	0.000275435	0.17674	0.0656721	0.00318782	0.282208	0.0550015
Reactome_N P80R	DAVID Reactome	R-HSA-6807878~COPI-mediated anterograde transport	720011388	Q13885, Q14204, Q9Y3B3, P18085, Q14789, P49755, Q01082, Q9BVK6, P68371, P62820	10	240	101	10946	3.14465	4.51568	7.12452e-05	0.00035358	0.220944	0.0360962	0.00402625	0.356432	0.0706036
Reactome_N P80R	DAVID Reactome	R-HSA-983170~Antigen Presentation: Folding, assembly and peptide loading of class I MHC	720012287	P53992, P04439, P27824, P30101, P27797, P10321	6	240	29	10946	1.88679	9.43621	3.24724e-05	0.000368147	0.228918	0.182147	0.00412559	0.365226	0.0735118
Reactome_N P80R	DAVID Reactome	R-HSA-199977~ER to Golgi Anterograde Transport	720010271	Q13885, Q14204, P53992, Q9Y3B3, P18085, Q14789, P49755, Q01082, Q9BVK6, O75396, P68371, P62820	12	240	154	10946	3.77358	3.5539	0.000143629	0.000551981	0.322812	0.10522	0.00608905	0.539044	0.11021
Reactome_N P80R	DAVID Reactome	R-HSA-5368286~Mitochondrial translation initiation	720010979	P82912, Q9NWU5, P82914, Q9Y3B7, Q8TAE8, P82909, Q8IXM3, Q5T653, Q16540	9	240	87	10946	2.83019	4.7181	0.000116766	0.000607996	0.349085	0.13984	0.00650372	0.575754	0.12139
Reactome_N P80R	DAVID Reactome	R-HSA-5419276~Mitochondrial translation termination	720010984	P82912, Q9NWU5, P82914, Q9Y3B7, Q8TAE8, P82909, Q8IXM3, Q5T653, Q16540	9	240	87	10946	2.83019	4.7181	0.000116766	0.000607996	0.349085	0.13984	0.00650372	0.575754	0.12139
Reactome_N P80R	DAVID Reactome	R-HSA-8856688~Golgi-to-ER retrograde transport	720011624	Q13885, Q14204, Q9NP72, Q9Y3B3, P18085, P49755, P20340, Q9BVK6, O75396, P68371, P62820	11	240	133	10946	3.45912	3.77212	0.000160615	0.000657919	0.371641	0.040595	0.0069327	0.61373	0.131355
Reactome_N P80R	DAVID Reactome	R-HSA-6798695~Neutrophil degranulation	720011351	Q96CS3, Q14204, Q07065, Q5T4S7, Q9NP72, P04439, Q86VP6, P51148, Q9UHA4, P68371, P10321, P51149, P84095, O00161, Q96BM9, P17858, Q5T9A4, Q7Z6Z7, P04075, P46940, P20340, P61106, Q14165	23	240	482	10946	7.2327	2.17633	0.000375507	0.000862232	0.456105	0.0923524	0.00895199	0.792492	0.172128
Reactome_N P80R	DAVID Reactome	R-HSA-70171~Glycolysis	720011450	P17858, P04406, Q8TEM1, Q92621, Q5SRE5, P04075, Q8N1F7, P19367	8	240	71	10946	2.51572	5.13897	0.000153657	0.000878031	0.462143	0.146651	0.00898391	0.795318	0.175281
Reactome_N P80R	DAVID Reactome	R-HSA-597592~Post-translational protein modification	720011312	Q14204, P04439, P18085, P51148, P14314, P51149, Q8IXI2, Q9NYU2, Q8NBJ4, P27824, P61106, Q07065, Q13885, Q14697, P04843, Q9Y673, Q9NP72, Q86VP6, Q01082, Q9Y3B3, P27797, P46977, O43852, Q14789, Q8TEM1, P78527, P30101, Q9NQS7, Q15084, P61088, P49755, Q9BVK6, Q93008, Q13501, P53992, P14625, Q8N1F7, P68371, O75352, O75396, Q86UP2, P15880, Q15293, Q92621, Q5SRE5, P20340, P62820, P61019, P21796, Q14165	50	240	1441	10946	15.7233	1.58252	0.000560348	0.000918787	0.477412	0.134641	0.00926662	0.820345	0.183413
Reactome_N P80R	DAVID Reactome	R-HSA-70895~Branched-chain amino acid catabolism	720011459	Q96RQ3, P12694, Q9HCC0, P24752, Q99714	5	240	21	10946	1.57233	10.8591	7.42057e-05	0.000990037	0.503073	0.414964	0.00984459	0.871512	0.19763
Reactome_N P80R	DAVID Reactome	R-HSA-176033~Interactions of Vpr with host cellular proteins	720010112	Q8TEM1, Q92621, P05141, Q5SRE5, Q8N1F7, P12235	6	240	36	10946	1.88679	7.60139	0.000117105	0.00103212	0.517633	0.364425	0.0101205	0.895933	0.206025
Reactome_N P80R	DAVID Reactome	R-HSA-9692914~SARS-CoV-1-host interactions	720012119	P62266, P62277, P15880, P62263, P62241, P62701, P62841, P62753, P62249	9	240	96	10946	2.83019	4.27578	0.000248839	0.00116659	0.561368	0.274607	0.0112824	0.998795	0.232853
Reactome_N P80R	DAVID Reactome	R-HSA-3296482~Defects in vitamin and cofactor metabolism	720010527	Q96RQ3, Q13085, P05165, P05166, Q9HCC0	5	240	22	10946	1.57233	10.3655	9.43246e-05	0.00118949	0.568412	0.529728	0.0113484	1.00464	0.237421
Reactome_N P80R	DAVID Reactome	R-HSA-5578775~Ion homeostasis	720011004	Q13555, Q12797, P54709, P16615, P20020, P05023, Q14573	7	240	56	10946	2.20126	5.70104	0.000207236	0.00132635	0.608207	0.381991	0.0124853	1.10529	0.264719
Reactome_N P80R	DAVID Reactome	R-HSA-6799198~Complex I biogenesis	720011352	O75306, P28331, Q9UI09, P49821, O43678, O95299, O75251	7	240	57	10946	2.20126	5.60102	0.0002319	0.00145579	0.642471	0.416397	0.0135236	1.1972	0.290536
Reactome_N P80R	DAVID Reactome	R-HSA-71387~Metabolism of carbohydrates	720011469	P04406, Q8TEM1, Q8N1F7, P11166, P19367, O00468, P53007, Q7LGA3, Q02978, P17858, P60891, Q92621, Q9UJS0, Q5SRE5, P04075, P11908	16	240	295	10946	5.03145	2.47367	0.000783986	0.00205572	0.766093	0.183189	0.0188485	1.6686	0.410142
Reactome_N P80R	DAVID Reactome	R-HSA-948021~Transport to the Golgi and subsequent modification	720011903	Q13885, Q14204, P53992, Q9Y3B3, P18085, Q14789, P49755, Q01082, Q9BVK6, O75396, P68371, P62820	12	240	185	10946	3.77358	2.95838	0.000773278	0.00244954	0.82298	0.450501	0.0221714	1.96277	0.488617
Reactome_N P80R	DAVID Reactome	R-HSA-8873719~RAB geranylgeranylation	720011646	Q9NP72, P20340, P51148, P62820, P61019, P61106, P51149	7	240	65	10946	2.20126	4.91167	0.000526396	0.00286766	0.868333	0.557394	0.0256275	2.26872	0.571902
Reactome_N P80R	DAVID Reactome	R-HSA-70268~Pyruvate metabolism	720011453	P08559, P10515, P11177, P35613, P21796	5	240	31	10946	1.57233	7.35618	0.000518119	0.00438799	0.955164	0.972952	0.0382459	3.38579	0.874438
Reactome_N P80R	DAVID Reactome	R-HSA-389661~Glyoxylate metabolism and glycine degradation	720010660	Q02218, P08559, P10515, P11177, P12694	5	240	31	10946	1.57233	7.35618	0.000518119	0.00438799	0.955164	0.972952	0.0382459	3.38579	0.874438
Reactome_N P80R	DAVID Reactome	R-HSA-9683686~Maturation of spike protein	720012110	Q14697, P27824, P14314	3	240	5	10946	0.943396	27.365	0.000100768	0.00454559	0.959905	0.906139	0.0391364	3.46463	0.905775
Reactome_N P80R	DAVID Reactome	R-HSA-6811442~Intra-Golgi and retrograde Golgi-to-ER traffic	720011395	Q13885, Q14204, Q9NP72, Q9Y3B3, P18085, O00461, P49755, P20340, Q9BVK6, O75396, P68371, P62820	12	240	202	10946	3.77358	2.70941	0.00165393	0.00478955	0.966276	0.34758	0.0407401	3.60659	0.954272
Reactome_N P80R	DAVID Reactome	R-HSA-2995410~Nuclear Envelope (NE) Reassembly	720010490	Q13885, P20700, Q92973, Q92621, Q5SRE5, Q8N1F7, P68371	7	240	75	10946	2.20126	4.25678	0.00124717	0.00583909	0.983989	0.724147	0.0488467	4.32425	1.16277
Reactome_N P80R	DAVID Reactome	R-HSA-6811434~COPI-dependent Golgi-to-ER retrograde traffic	720011391	Q13885, Q9Y3B3, P18085, P49755, Q9BVK6, O75396, P68371, P62820	8	240	99	10946	2.51572	3.68552	0.00146267	0.00588097	0.984458	0.779219	0.0488467	4.32425	1.17109
Reactome_N R203M	DAVID Reactome	R-HSA-426496~Post-transcriptional silencing by small RNAs	720010768	Q9UKV8, Q9HCJ0, Q9H9G7, Q9UL18, Q9UPQ9, Q8NDV7	6	240	7	10946	1.62602	39.0929	7.17858e-10	9.64773e-08	9.03951e-05	1.12976e-05	9.03992e-05	0.00864436	1.92749e-05
Reactome_N R203M	DAVID Reactome	R-HSA-8948700~Competing endogenous RNAs (ceRNAs) regulate PTEN translation	720011697	Q9UKV8, Q9HCJ0, Q9H9G7, Q9UL18, Q9UPQ9, Q8NDV7	6	240	8	10946	1.62602	34.2062	2.81881e-09	2.52691e-07	0.000236744	5.01791e-05	0.000118386	0.0113206	5.04844e-05
Reactome_N R203M	DAVID Reactome	R-HSA-9768778~Regulation of NPAS4 mRNA translation	720012266	Q9UKV8, Q9HCJ0, Q9H9G7, Q9UL18, Q9UPQ9, Q8NDV7	6	240	9	10946	1.62602	30.4056	8.30148e-09	5.58436e-07	0.000523118	0.00014563	0.000130814	0.012509	0.000111568
Reactome_N R203M	DAVID Reactome	R-HSA-8943723~Regulation of PTEN mRNA translation	720011694	Q9UKV8, Q9HCJ0, Q9H9G7, Q9UL18, Q9UPQ9, Q8NDV7	6	240	9	10946	1.62602	30.4056	8.30148e-09	5.58436e-07	0.000523118	0.00014563	0.000130814	0.012509	0.000111568
Reactome_N R203M	DAVID Reactome	R-HSA-379724~tRNA Aminoacylation	720010617	P54577, P49591, Q9P2J5, Q15181, Q12904, P49589, P49588, Q9NSE4, Q9BW92	9	240	42	10946	2.43902	9.77321	2.39228e-07	2.85607e-06	0.00267256	0.000863719	0.000535227	0.0511807	0.000570603
Reactome_N R203M	DAVID Reactome	R-HSA-9768759~Regulation of NPAS4 gene expression	720012264	Q9UKV8, Q9HCJ0, Q9H9G7, Q9UL18, Q9UPQ9, Q8NDV7	6	240	13	10946	1.62602	21.05	1.57505e-07	5.30906e-06	0.00496225	0.00186752	0.000806801	0.0771498	0.00106068
Reactome_N R203M	DAVID Reactome	R-HSA-72766~Translation	720011493	P61619, Q9Y3U8, P54577, O15372, P49591, Q12904, Q9BW92, O00303, O60841, Q05639, Q9P2J5, Q15181, Q9UI10, Q7L2H7, P15170, P49589, Q9UBQ5, P49588, Q9NSE4, P60228, Q9UNX3	21	240	292	10946	5.69106	3.28005	1.72079e-06	6.02733e-06	0.00563171	0.000443866	0.000806801	0.0771498	0.00120418
Reactome_N R203M	DAVID Reactome	R-HSA-379716~Cytosolic tRNA aminoacylation	720010616	P54577, P49591, Q9P2J5, Q15181, Q12904, P49589, P49588	7	240	24	10946	1.89702	13.3024	5.62001e-07	9.84865e-06	0.00918579	0.00419606	0.00115352	0.110305	0.00196762
Reactome_N R203M	DAVID Reactome	R-HSA-429914~Deadenylation-dependent mRNA decay	720010786	Q9H9A5, Q504Q3, Q9H074, Q8IZH2, Q5TAX3, Q5VYS8, Q9NPI6, Q86TB9, Q15477	9	240	55	10946	2.43902	7.46318	2.66141e-06	2.30688e-05	0.0213838	0.00956698	0.0022265	0.212908	0.0046088
Reactome_N R203M	DAVID Reactome	R-HSA-8934593~Regulation of RUNX1 Expression and Activity	720011668	Q9UKV8, Q9HCJ0, Q9H9G7, Q9UL18, Q9UPQ9, Q8NDV7	6	240	17	10946	1.62602	16.0971	1.05511e-06	2.3762e-05	0.0220192	0.00948244	0.0022265	0.212908	0.00474728
Reactome_N R203M	DAVID Reactome	R-HSA-194315~Signaling by Rho GTPases	720010232	Q8IWW6, P12277, Q6NZI2, Q5T0N5, O43639, Q05397, Q7Z406, Q68EM7, P35580, P61981, Q86YQ8, Q00610, Q9H0B6, P61586, Q99707, Q01968, A1A4S6, Q92997, Q93008, Q969V6, Q12774, P52565, O15013, Q9BZD4, Q9NSV4, Q01082, Q7L576, Q07960, P68371, P34897, Q96DH6, Q8TBC3, P41240, Q96BD8	34	240	707	10946	9.21409	2.19333	1.17457e-05	2.69344e-05	0.0249221	0.00302581	0.00229432	0.219393	0.00538107
Reactome_N R203M	DAVID Reactome	R-HSA-9716542~Signaling by Rho GTPases, Miro GTPases and RHOBTB3	720012192	Q8IWW6, P12277, Q6NZI2, Q5T0N5, O43639, Q05397, Q7Z406, Q68EM7, P35580, P61981, Q86YQ8, Q00610, Q9H0B6, P61586, Q99707, Q01968, A1A4S6, Q92997, Q93008, Q969V6, Q12774, P52565, O15013, Q9BZD4, Q9NSV4, Q01082, Q7L576, Q07960, P68371, P34897, Q96DH6, Q8TBC3, P41240, Q96BD8	34	240	723	10946	9.21409	2.14479	1.87784e-05	4.20928e-05	0.038674	0.00483316	0.00328674	0.314293	0.0084094
Reactome_N R203M	DAVID Reactome	R-HSA-9634815~Transcriptional Regulation by NPAS4	720011957	Q9UKV8, Q9HCJ0, Q9H9G7, Q9UL18, Q00535, Q9UPQ9, Q8NDV7	7	240	34	10946	1.89702	9.38995	7.24416e-06	8.19616e-05	0.073926	0.0312735	0.00590754	0.564904	0.0163742
Reactome_N R203M	DAVID Reactome	R-HSA-9012999~RHO GTPase cycle	720011779	Q12774, P52565, Q8IWW6, O15013, Q01082, Q9NSV4, P12277, Q6NZI2, Q7L576, Q07960, O43639, Q5T0N5, P34897, Q68EM7, Q96DH6, Q8TBC3, P41240, Q86YQ8, Q00610, P61586, Q99707, A1A4S6, Q01968, Q93008	24	240	449	10946	6.50407	2.43786	4.92217e-05	0.000127084	0.112268	0.0126192	0.00790499	0.755909	0.0253881
Reactome_N R203M	DAVID Reactome	R-HSA-380284~Loss of proteins required for interphase microtubule organization from the centrosome	720010623	Q96CS2, Q9H6D7, P61981, Q9BT25, Q68CZ6, Q99871, Q9NVX0, P68371, O94927	9	240	70	10946	2.43902	5.86393	2.04527e-05	0.000134984	0.118816	0.0311652	0.00790499	0.755909	0.0269662
Reactome_N R203M	DAVID Reactome	R-HSA-380259~Loss of Nlp from mitotic centrosomes	720010621	Q96CS2, Q9H6D7, P61981, Q9BT25, Q68CZ6, Q99871, Q9NVX0, P68371, O94927	9	240	70	10946	2.43902	5.86393	2.04527e-05	0.000134984	0.118816	0.0311652	0.00790499	0.755909	0.0269662
Reactome_N R203M	DAVID Reactome	R-HSA-8854518~AURKA Activation by TPX2	720011621	Q96CS2, Q9H6D7, P61981, Q9BT25, Q68CZ6, Q99871, Q9NVX0, P68371, O94927	9	240	73	10946	2.43902	5.62295	2.88375e-05	0.000181702	0.156563	0.0507483	0.010015	0.957678	0.0362984
Reactome_N R203M	DAVID Reactome	R-HSA-1430728~Metabolism	720009866	Q9Y3U8, P04114, Q7LG56, P08559, A8MXV4, Q9H6Q4, P06737, P10515, P40926, Q96QG7, P50570, Q12904, O43314, P11166, Q9P2R7, P15531, Q9P2J5, Q96EK7, Q15181, P31939, Q92530, Q8NFF5, P49419, Q01968, P34913, Q9Y315, P52209, O75131, P38117, P19623, Q7Z4W1, P00338, P16152, P00374, Q9UNX3, P00492, P13804, P04899, P31153, Q96I15, P12277, O00443, O95299, P15104, Q96T21, O00170, P04181, Q9UBQ7, P04183, P61764,…	70	240	2118	10946	18.9702	1.50736	0.000139465	0.000216271	0.18345	0.0353446	0.0112581	1.07655	0.0432034
Reactome_N R203M	DAVID Reactome	R-HSA-5653656~Vesicle-mediated transport	720011168	P04114, P50395, P56377, P50570, O00186, Q86YS7, Q5T0N5, O00443, Q7Z392, Q9H0U4, Q99962, Q5VZE5, P61981, Q8IWF6, Q99961, Q00610, Q9UK41, Q9H0B6, Q147X3, Q01968, Q14671, O94973, Q9Y478, Q9Y678, Q12756, Q01082, P68371, Q9Y4L1, O60333, P27797	30	240	673	10946	8.13008	2.03306	0.00015921	0.000338992	0.272171	0.040247	0.0164108	1.56927	0.0677147
Reactome_N R203M	DAVID Reactome	R-HSA-3858494~Beta-catenin independent WNT signaling	720010646	O94973, Q9UKV8, Q9HCJ0, Q9H9G7, Q9UL18, Q00610, Q9UPQ9, Q92530, P61586, Q8NDV7, Q92997, O43318	12	240	146	10946	3.25203	3.74863	8.61909e-05	0.000350284	0.279834	0.0645379	0.0164108	1.56927	0.0699698
Reactome_N R203M	DAVID Reactome	R-HSA-380287~Centrosome maturation	720010624	Q96CS2, Q9H6D7, P61981, Q9BT25, Q68CZ6, Q99871, Q9NVX0, P68371, O94927	9	240	82	10946	2.43902	5.00579	7.33584e-05	0.000407139	0.317209	0.107352	0.0173404	1.65817	0.0813245
Reactome_N R203M	DAVID Reactome	R-HSA-380270~Recruitment of mitotic centrosome proteins and complexes	720010622	Q96CS2, Q9H6D7, P61981, Q9BT25, Q68CZ6, Q99871, Q9NVX0, P68371, O94927	9	240	82	10946	2.43902	5.00579	7.33584e-05	0.000407139	0.317209	0.107352	0.0173404	1.65817	0.0813245
Reactome_N R203M	DAVID Reactome	R-HSA-5628897~TP53 Regulates Metabolic Genes	720011147	Q7LG56, Q9Y478, Q9UKV8, Q9HCJ0, P61981, Q9H9G7, Q9UL18, Q9UPQ9, Q8NDV7	9	240	87	10946	2.43902	4.7181	0.000116766	0.000607996	0.434399	0.13984	0.0246204	2.35431	0.121433
Reactome_N R203M	DAVID Reactome	R-HSA-2565942~Regulation of PLK1 Activity at G2/M Transition	720010458	Q96CS2, Q9H6D7, P61981, Q9BT25, Q68CZ6, Q99871, Q9NVX0, P68371, O94927	9	240	88	10946	2.43902	4.66449	0.000127623	0.000656431	0.45951	0.179279	0.0246204	2.35431	0.131103
Reactome_N R203M	DAVID Reactome	R-HSA-199991~Membrane Trafficking	720010272	P04114, P50395, P56377, P50570, O00186, Q86YS7, Q5T0N5, O00443, Q7Z392, Q9H0U4, Q99962, Q5VZE5, P61981, Q8IWF6, Q99961, Q00610, Q9UK41, Q9H0B6, Q147X3, Q01968, Q14671, O94973, Q9Y478, Q9Y678, Q12756, Q01082, P68371, O60333	28	240	634	10946	7.58808	2.01425	0.000310895	0.000656894	0.459744	0.0770899	0.0246204	2.35431	0.131196
Reactome_N R203M	DAVID Reactome	R-HSA-9022692~Regulation of MECP2 expression and activity	720011828	Q9UKV8, Q9HCJ0, Q9H9G7, Q9UL18, Q9UPQ9, Q8NDV7	6	240	33	10946	1.62602	8.29242	7.03539e-05	0.000685279	0.473933	0.353154	0.0246964	2.36158	0.136863
Reactome_N R203M	DAVID Reactome	R-HSA-187037~Signaling by NTRK1 (TRKA)	720010171	O94973, P46109, Q99962, P29353, Q15418, Q00535, P50570, Q00610, Q9Y4H2, P61586	10	240	115	10946	2.71003	3.96594	0.00021155	0.000914732	0.575777	0.103423	0.0314445	3.00686	0.182668
Reactome_N R203M	DAVID Reactome	R-HSA-927802~Nonsense-Mediated Decay (NMD)	720011890	Q9Y3U8, Q96Q15, Q92540, Q9UPR3, Q9NPI6, P15170, Q9HAU5, Q92900, Q86US8, Q9UNX3	10	240	116	10946	2.71003	3.93175	0.000227131	0.000973201	0.598414	0.254002	0.0314445	3.00686	0.194338
Reactome_N R203M	DAVID Reactome	R-HSA-975957~Nonsense Mediated Decay (NMD) enhanced by the Exon Junction Complex (EJC)	720012259	Q9Y3U8, Q96Q15, Q92540, Q9UPR3, Q9NPI6, P15170, Q9HAU5, Q92900, Q86US8, Q9UNX3	10	240	116	10946	2.71003	3.93175	0.000227131	0.000973201	0.598414	0.254002	0.0314445	3.00686	0.194338
Reactome_N R203M	DAVID Reactome	R-HSA-380320~Recruitment of NuMA to mitotic centrosomes	720010625	Q96CS2, Q9H6D7, P61981, Q9BT25, Q68CZ6, Q99871, Q9NVX0, P68371, O94927	9	240	94	10946	2.43902	4.36676	0.000212034	0.00101649	0.614394	0.354471	0.0317485	3.03593	0.202979
Reactome_N R203M	DAVID Reactome	R-HSA-9029569~NR1H3 & NR1H2 regulate gene expression linked to cholesterol transport and efflux	720011857	Q9UKV8, Q9HCJ0, Q9H9G7, Q9UL18, Q9UPQ9, Q8NDV7	6	240	37	10946	1.62602	7.39595	0.000137234	0.00117243	0.666865	0.452257	0.0354375	3.38869	0.234098
Reactome_N R203M	DAVID Reactome	R-HSA-432722~Golgi Associated Vesicle Biogenesis	720010796	Q99962, P56377, P50570, Q00610, O00443, Q01968, Q14671	7	240	56	10946	1.89702	5.70104	0.000207236	0.00132635	0.711659	0.381991	0.0378738	3.62166	0.264811
Reactome_N R203M	DAVID Reactome	R-HSA-5620912~Anchoring of the basal body to the plasma membrane	720011127	Q96CS2, Q9H6D7, P61981, Q9BT25, Q68CZ6, Q99871, Q9NVX0, P68371, O94927	9	240	98	10946	2.43902	4.18852	0.000290794	0.00133387	0.713687	0.201569	0.0378738	3.62166	0.266312
Reactome_N R203M	DAVID Reactome	R-HSA-429947~Deadenylation of mRNA	720010787	Q9H9A5, Q504Q3, Q9H074, Q5TAX3, Q5VYS8	5	240	24	10946	1.35501	9.50174	0.000146885	0.00166976	0.791095	0.666821	0.0460167	4.40032	0.333319
Reactome_N S235F	DAVID Reactome	R-HSA-1430728~Metabolism	720009866	P53004, Q9Y3U8, P53992, Q9NVE7, P04899, P43490, P22570, P04406, P50570, P40926, O00763, P15531, Q8NF37, P42704, P00558, Q15181, P07195, P55263, Q9UJS0, Q99707, Q8NFF5, P61106	22	48	2118	10946	40.7407	2.3687	2.6872e-05	6.5023e-05	0.0195098	0.0069091	0.019702	1.92468	0.0129614
Reactome_N S235F	DAVID Reactome	R-HSA-8873719~RAB geranylgeranylation	720011646	Q8WUD1, Q9NP72, P51148, P62820, P61106	5	48	65	10946	9.25926	17.5417	8.88008e-06	0.000166755	0.0492755	0.0136524	0.0252634	2.46797	0.0332385
Reactome_N S235F	DAVID Reactome	R-HSA-70263~Gluconeogenesis	720011452	P04406, P00558, P40926, Q9UJS0	4	48	34	10946	7.40741	26.8284	1.37049e-05	0.000404419	0.11535	0.058339	0.0352633	3.44486	0.0806015
Reactome_N S235F	DAVID Reactome	R-HSA-5653656~Vesicle-mediated transport	720011168	P50395, P53992, Q92538, Q12756, Q9NP72, P50570, P51148, Q9Y4L1, P62820, P61106, Q14671	11	48	673	10946	20.3704	3.72728	0.000121817	0.000468906	0.132476	0.0309418	0.0352633	3.44486	0.0934509
Reactome_N S235F	DAVID Reactome	R-HSA-8876198~RAB GEFs exchange GTP for GDP on RABs	720011655	P50395, Q9NP72, P51148, P62820, P61106	5	48	90	10946	9.25926	12.669	4.35336e-05	0.000581902	0.16169	0.0756121	0.0352633	3.44486	0.115964
Reactome_N S235F	DAVID Reactome	R-HSA-6798695~Neutrophil degranulation	720011351	Q96CS3, Q8NF37, P50395, Q9NP72, Q96BM9, Q7Z6Z7, P61586, P51148, P61106	9	48	482	10946	16.6667	4.25804	0.000208813	0.000921061	0.243619	0.0524535	0.0465136	4.5439	0.183522
Reactome_N T205I	DAVID Reactome	R-HSA-168255~Influenza Infection	720010045	Q9Y3U8, P26373, P62917, Q8TEM1, P12236, P18077, Q8N1F7, P18124, P62277, P50914, Q00610, P40429, P62910, Q92621, P27824, P62841, P46776, P62753, P27635, P27797, P46778	21	131	157	10946	13.2911	11.1764	1.27979e-16	1.73071e-15	1.29319e-12	5.72875e-14	1.25996e-12	1.11285e-10	3.55271e-13
Reactome_N T205I	DAVID Reactome	R-HSA-5663205~Infectious disease	720011233	Q9Y3U8, Q14204, Q14643, P62917, Q8TEM1, P12236, P18124, P14314, P12235, P62277, P50914, P61088, Q00610, P62910, P40429, Q14571, Q92530, P27824, Q9UN86, P62753, P62633, P60953, Q14697, P26373, P18077, Q8N1F7, P68371, O00159, P10321, P17302, Q9BUF5, P00558, Q92621, P04350, P05023, P05067, P62841, P46776, P27635, P27797, P46778	41	131	960	10946	25.9494	3.56859	1.55294e-13	5.749e-13	4.18508e-10	4.00726e-11	1.4268e-10	1.26021e-08	1.14819e-10
Reactome_N T205I	DAVID Reactome	R-HSA-2408522~Selenoamino acid metabolism	720010424	Q9Y3U8, P26373, P62917, Q12904, P18077, P18124, P62277, P50914, Q9P2J5, P40429, P62910, P62841, P46776, P62753, P27635, P56192, P46778	17	131	119	10946	10.7595	11.9368	4.293e-14	5.87966e-13	4.28045e-10	3.32554e-11	1.4268e-10	1.26021e-08	1.17428e-10
Reactome_N T205I	DAVID Reactome	R-HSA-168273~Influenza Viral RNA Transcription and Replication	720010050	Q9Y3U8, P26373, P62917, Q8TEM1, P18077, Q8N1F7, P18124, P62277, P50914, P40429, P62910, Q92621, P62841, P46776, P62753, P27635, P46778	17	131	136	10946	10.7595	10.4447	4.10513e-13	4.82635e-12	3.51359e-09	3.17774e-10	8.34091e-10	7.36704e-08	9.63951e-10
Reactome_N T205I	DAVID Reactome	R-HSA-975956~Nonsense Mediated Decay (NMD) independent of the Exon Junction Complex (EJC)	720012258	Q9Y3U8, P26373, P62917, P18077, P18124, P62277, P50914, P40429, P62910, Q92900, P62841, P46776, P62753, P27635, P46778	15	131	96	10946	9.49367	13.0558	3.77541e-13	5.72865e-12	4.17045e-09	4.87087e-10	8.34091e-10	7.36704e-08	1.14415e-09
Reactome_N T205I	DAVID Reactome	R-HSA-1643685~Disease	720009979	Q9Y3U8, Q14204, Q14643, P62917, P11166, P18124, P14314, P62277, Q96RQ3, P62910, Q14571, Q92530, P27824, P62753, P62633, O94905, Q14697, Q01082, O00159, P10321, P84095, Q9BUF5, P05023, P05067, P67936, P46776, P62841, P27635, P27797, P46778, Q8TEM1, P12236, P12235, P50914, P61088, Q00610, P40429, P02545, Q9UN86, P60953, P26373, P18077, Q8N1F7, P19367, P68371, Q9HCC0, P17302, P20700, Q04721, P00558,…	54	131	1748	10946	34.1772	2.58129	3.40786e-12	9.02255e-12	6.56842e-09	8.7922e-10	1.09474e-09	9.66916e-08	1.80204e-09
Reactome_N T205I	DAVID Reactome	R-HSA-192823~Viral mRNA Translation	720010210	Q9Y3U8, P26373, P62917, P18077, P18124, P62277, P50914, P40429, P62910, P62841, P46776, P62753, P27635, P46778	14	131	90	10946	8.86076	12.9978	2.55542e-12	3.85522e-11	2.8066e-08	4.61505e-09	3.50825e-09	3.09863e-07	7.69985e-09
Reactome_N T205I	DAVID Reactome	R-HSA-156902~Peptide chain elongation	720009921	Q9Y3U8, P26373, P62917, P18077, P18124, P62277, P50914, P40429, P62910, P62841, P46776, P62753, P27635, P46778	14	131	90	10946	8.86076	12.9978	2.55542e-12	3.85522e-11	2.8066e-08	4.61505e-09	3.50825e-09	3.09863e-07	7.69985e-09
Reactome_N T205I	DAVID Reactome	R-HSA-1799339~SRP-dependent cotranslational protein targeting to membrane	720010133	Q9Y3U8, P26373, P62917, P18077, P18124, O76094, P62277, P50914, P40429, P62910, P62841, P46776, P62753, P27635, P46778	15	131	113	10946	9.49367	11.0917	4.40443e-12	5.53987e-11	4.03302e-08	9.09084e-09	4.11861e-09	3.63773e-07	1.10645e-08
Reactome_N T205I	DAVID Reactome	R-HSA-2408557~Selenocysteine synthesis	720010427	Q9Y3U8, P26373, P62917, P18077, P18124, P62277, P50914, P40429, P62910, P62841, P46776, P62753, P27635, P46778	14	131	94	10946	8.86076	12.4447	4.73273e-12	6.78892e-11	4.94234e-08	9.76844e-09	4.11861e-09	3.63773e-07	1.35592e-08
Reactome_N T205I	DAVID Reactome	R-HSA-156842~Eukaryotic Translation Elongation	720009920	Q9Y3U8, P26373, P62917, P18077, P18124, P62277, P50914, P40429, P62910, P62841, P46776, P62753, P27635, P46778	14	131	94	10946	8.86076	12.4447	4.73273e-12	6.78892e-11	4.94234e-08	9.76844e-09	4.11861e-09	3.63773e-07	1.35592e-08
Reactome_N T205I	DAVID Reactome	R-HSA-72764~Eukaryotic Translation Termination	720011492	Q9Y3U8, P26373, P62917, P18077, P18124, P62277, P50914, P40429, P62910, P62841, P46776, P62753, P27635, P46778	14	131	94	10946	8.86076	12.4447	4.73273e-12	6.78892e-11	4.94234e-08	9.76844e-09	4.11861e-09	3.63773e-07	1.35592e-08
Reactome_N T205I	DAVID Reactome	R-HSA-927802~Nonsense-Mediated Decay (NMD)	720011890	Q9Y3U8, P26373, P62917, P18077, P18124, P62277, P50914, P40429, P62910, Q92900, P62841, P46776, P62753, P27635, P46778	15	131	116	10946	9.49367	10.8048	6.49991e-12	7.93637e-11	5.77768e-08	8.38489e-09	4.12691e-09	3.64506e-07	1.5851e-08
Reactome_N T205I	DAVID Reactome	R-HSA-975957~Nonsense Mediated Decay (NMD) enhanced by the Exon Junction Complex (EJC)	720012259	Q9Y3U8, P26373, P62917, P18077, P18124, P62277, P50914, P40429, P62910, Q92900, P62841, P46776, P62753, P27635, P46778	15	131	116	10946	9.49367	10.8048	6.49991e-12	7.93637e-11	5.77768e-08	8.38489e-09	4.12691e-09	3.64506e-07	1.5851e-08
Reactome_N T205I	DAVID Reactome	R-HSA-9633012~Response of EIF2AK4 (GCN2) to amino acid deficiency	720011951	Q9Y3U8, P26373, P62917, P18077, P18124, P62277, P50914, P40429, P62910, P62841, P46776, P62753, P27635, P46778	14	131	102	10946	8.86076	11.4686	1.48969e-11	1.94572e-10	1.41649e-07	1.53737e-08	8.85304e-09	7.81938e-07	3.88611e-08
Reactome_N T205I	DAVID Reactome	R-HSA-72689~Formation of a pool of free 40S subunits	720011486	Q9Y3U8, P26373, P62917, P18077, P18124, P62277, P50914, P40429, P62910, P62841, P46776, P62753, P27635, P46778	14	131	102	10946	8.86076	11.4686	1.48969e-11	1.94572e-10	1.41649e-07	1.53737e-08	8.85304e-09	7.81938e-07	3.88611e-08
Reactome_N T205I	DAVID Reactome	R-HSA-156827~L13a-mediated translational silencing of Ceruloplasmin expression	720009919	Q9Y3U8, P26373, P62917, P18077, P18124, P62277, P50914, P40429, P62910, P62841, P46776, P62753, P27635, P46778	14	131	112	10946	8.86076	10.4447	5.44268e-11	6.39452e-10	4.65521e-07	5.61685e-08	2.73836e-08	2.41863e-06	1.27715e-07
Reactome_N T205I	DAVID Reactome	R-HSA-72706~GTP hydrolysis and joining of the 60S ribosomal subunit	720011489	Q9Y3U8, P26373, P62917, P18077, P18124, P62277, P50914, P40429, P62910, P62841, P46776, P62753, P27635, P46778	14	131	113	10946	8.86076	10.3522	6.15006e-11	7.15379e-10	5.20796e-07	1.26937e-07	2.89331e-08	2.55549e-06	1.42879e-07
Reactome_N T205I	DAVID Reactome	R-HSA-72766~Translation	720011493	O75616, Q9Y3U8, P82914, P26373, P62917, Q12904, P18077, P18124, O76094, P62277, P50914, Q9P2J5, P40429, P62910, P62841, P46776, P62753, P27635, P56192, P46778	20	131	292	10946	12.6582	5.7231	2.38853e-10	1.45681e-09	1.06055e-06	6.16241e-08	5.27447e-08	4.65863e-06	2.90962e-07
Reactome_N T205I	DAVID Reactome	R-HSA-72613~Eukaryotic Translation Initiation	720011483	Q9Y3U8, P26373, P62917, P18077, P18124, P62277, P50914, P40429, P62910, P62841, P46776, P62753, P27635, P46778	14	131	120	10946	8.86076	9.74835	1.39898e-10	1.52148e-09	1.10764e-06	1.08281e-07	5.27447e-08	4.65863e-06	3.03879e-07
Reactome_N T205I	DAVID Reactome	R-HSA-72737~Cap-dependent Translation Initiation	720011491	Q9Y3U8, P26373, P62917, P18077, P18124, P62277, P50914, P40429, P62910, P62841, P46776, P62753, P27635, P46778	14	131	120	10946	8.86076	9.74835	1.39898e-10	1.52148e-09	1.10764e-06	1.08281e-07	5.27447e-08	4.65863e-06	3.03879e-07
Reactome_N T205I	DAVID Reactome	R-HSA-2262752~Cellular responses to stress	720010418	Q9Y3U8, P04114, Q14204, P54652, P62917, Q8TEM1, P18124, P62277, P50914, P62910, P40429, Q92530, P02545, P62753, P26373, Q6IAA8, P14625, P18077, Q8N1F7, P68371, Q9Y4L1, Q8TCT9, Q9BUF5, Q9HCE1, P20700, Q92621, P04350, P62841, P46776, P27635, P27797, P46778	32	131	789	10946	20.2532	3.38889	5.44054e-10	1.91388e-09	1.3933e-06	1.40366e-07	6.33321e-08	5.59375e-06	3.82251e-07
Reactome_N T205I	DAVID Reactome	R-HSA-392499~Metabolism of proteins	720010689	Q9Y3U8, P04114, Q14204, P18085, P62917, Q12904, P18124, P14314, P62277, Q9P2J5, P62910, P61026, Q92530, P27824, P62753, O75616, P82914, Q14697, Q9Y678, Q9NP72, Q01082, Q9BUF5, P05067, Q15477, P46776, P62841, P27635, P27797, P46778, O15020, O43852, Q13813, Q9Y287, Q8TEM1, P78527, P30101, P84085, P50914, P61088, P40429, Q93008, P26373, P14625, P18077, Q8N1F7, P68371, O75396, O76094, Q15293, Q92621,…	53	131	1970	10946	33.5443	2.24799	1.24149e-09	2.85638e-09	2.07944e-06	3.20305e-07	8.87506e-08	7.83882e-06	5.70492e-07
Reactome_N T205I	DAVID Reactome	R-HSA-8953897~Cellular responses to stimuli	720011713	Q9Y3U8, P04114, Q14204, P54652, P62917, Q8TEM1, P18124, P62277, P50914, P62910, P40429, Q92530, P02545, P62753, P26373, Q6IAA8, P14625, P18077, Q8N1F7, P68371, Q9Y4L1, Q8TCT9, Q9BUF5, Q9HCE1, P20700, Q92621, P04350, P62841, P46776, P27635, P27797, P46778	32	131	803	10946	20.2532	3.3298	8.46895e-10	2.92584e-09	2.13001e-06	2.18499e-07	8.87506e-08	7.83882e-06	5.84366e-07
Reactome_N T205I	DAVID Reactome	R-HSA-9711097~Cellular response to starvation	720012189	Q9Y3U8, P26373, P62917, Q6IAA8, P18077, P18124, P62277, P50914, P40429, P62910, P62841, P46776, P62753, P27635, P46778	15	131	157	10946	9.49367	7.98318	5.20378e-10	4.54195e-09	3.30654e-06	2.68515e-07	1.28937e-07	1.13882e-05	9.07145e-07
Reactome_N T205I	DAVID Reactome	R-HSA-6791226~Major pathway of rRNA processing in the nucleolus and cytosol	720011341	Q9Y3U8, P26373, P62917, P18077, Q8IY37, P18124, P62277, P50914, P40429, P62910, P62841, P46776, P62753, P27635, Q99848, P46778	16	131	185	10946	10.1266	7.22657	5.87805e-10	4.60489e-09	3.35235e-06	4.54961e-07	1.28937e-07	1.13882e-05	9.19715e-07
Reactome_N T205I	DAVID Reactome	R-HSA-8868773~rRNA processing in the nucleus and cytosol	720011644	Q9Y3U8, P26373, P62917, P18077, Q8IY37, P18124, P62277, P50914, P40429, P62910, P62841, P46776, P62753, P27635, Q99848, P46778	16	131	195	10946	10.1266	6.85598	1.27862e-09	9.46493e-09	6.89044e-06	3.29883e-07	2.55202e-07	2.25405e-05	1.89039e-06
Reactome_N T205I	DAVID Reactome	R-HSA-9010553~Regulation of expression of SLITs and ROBOs	720011775	Q9Y3U8, P26373, P62917, P18077, P18124, P62277, P50914, P40429, P62910, Q92530, P62841, P46776, P62753, P27635, P46778	15	131	172	10946	9.49367	7.28697	1.87122e-09	1.47941e-08	1.077e-05	4.82776e-07	3.84646e-07	3.39735e-05	2.95475e-06
Reactome_N T205I	DAVID Reactome	R-HSA-71291~Metabolism of amino acids and derivatives	720011466	Q9Y3U8, P10515, P26373, P62917, Q12904, P18077, P18124, Q9HCC0, P62277, Q96RQ3, P50914, Q9P2J5, P40429, P62910, Q92530, P62841, P46776, P62753, P27635, P56192, P46778	21	131	376	10946	13.2911	4.66676	3.37411e-09	1.6599e-08	1.2084e-05	8.7052e-07	4.16691e-07	3.68039e-05	3.31524e-06
Reactome_N T205I	DAVID Reactome	R-HSA-72312~rRNA processing	720011482	Q9Y3U8, P26373, P62917, P18077, Q8IY37, P18124, P62277, P50914, P40429, P62910, P62841, P46776, P62753, P27635, Q99848, P46778	16	131	205	10946	10.1266	6.52154	2.65705e-09	1.86428e-08	1.35719e-05	2.05655e-06	4.524e-07	3.99578e-05	3.72345e-06
Reactome_N T205I	DAVID Reactome	R-HSA-422475~Axon guidance	720010756	Q9Y3U8, O15020, Q13813, P62917, P18124, Q7Z406, P62277, P50914, Q00610, P62910, P40429, Q92530, P62753, P60953, P26373, P18077, Q01082, P68371, Q9BUF5, P08134, P04350, P62841, P46776, P27635, P46778	25	131	553	10946	15.8228	3.77745	7.00629e-09	2.76329e-08	2.01165e-05	1.80762e-06	6.48927e-07	5.7316e-05	5.519e-06
Reactome_N T205I	DAVID Reactome	R-HSA-376176~Signaling by ROBO receptors	720010607	Q9Y3U8, P26373, P62917, P18077, P18124, P62277, P50914, P40429, P62910, Q92530, P62841, P46776, P62753, P27635, P60953, P46778	16	131	219	10946	10.1266	6.10464	6.90971e-09	4.51862e-08	3.2895e-05	1.7827e-06	1.02799e-06	9.07959e-05	9.02483e-06
Reactome_N T205I	DAVID Reactome	R-HSA-9675108~Nervous system development	720012086	Q9Y3U8, O15020, Q13813, P62917, P18124, Q7Z406, P62277, P50914, Q00610, P62910, P40429, Q92530, P62753, P60953, P26373, P18077, Q01082, P68371, Q9BUF5, P08134, P04350, P62841, P46776, P27635, P46778	25	131	578	10946	15.8228	3.61407	1.69908e-08	6.40284e-08	4.66116e-05	4.38361e-06	1.41251e-06	0.000124758	1.27881e-05
Reactome_N T205I	DAVID Reactome	R-HSA-446203~Asparagine N-linked glycosylation	720010831	Q14204, O15020, Q9Y678, Q14697, Q13813, P18085, Q01082, P30101, P68371, O75396, P14314, P84085, Q9BUF5, P04350, P27824, P27797, Q14165	17	131	304	10946	10.7595	4.67261	1.19436e-07	5.8946e-07	0.000429035	3.0814e-05	1.26214e-05	0.00111477	0.00011773
Reactome_N T205I	DAVID Reactome	R-HSA-6807878~COPI-mediated anterograde transport	720011388	P84085, Q14204, O15020, Q9BUF5, Q9Y678, Q13813, P18085, P04350, Q01082, P68371	10	131	101	10946	6.32911	8.273	3.25961e-07	2.95841e-06	0.00215141	0.000168182	6.15349e-05	0.00543502	0.000590869
Reactome_N T205I	DAVID Reactome	R-HSA-8953854~Metabolism of RNA	720011712	Q9Y3U8, O43592, P62917, Q8TEM1, P18124, P62277, P50914, Q92973, P62910, P40429, Q92530, Q99848, P62753, P26373, P18077, Q8N1F7, Q8IY37, Q6PGP7, Q92621, Q92900, Q15477, P62841, P46776, P27635, P46778	25	131	716	10946	15.8228	2.9175	1.02803e-06	3.11333e-06	0.00226394	0.000265197	6.29584e-05	0.00556075	0.000621811
Reactome_N T205I	DAVID Reactome	R-HSA-5653656~Vesicle-mediated transport	720011168	P04114, P50395, Q14204, O15020, Q9Y678, Q13813, Q9NP72, P18085, P14625, Q01082, P68371, O75396, Q9Y4L1, O00159, P36383, P17302, P84085, Q9BUF5, Q00610, P61026, P04350, P02786, P05067, P27797	24	131	673	10946	15.1899	2.97975	1.20862e-06	3.74182e-06	0.00272034	0.000311775	7.36228e-05	0.00650267	0.000747336
Reactome_N T205I	DAVID Reactome	R-HSA-1430728~Metabolism	720009866	P30049, Q9Y3U8, P04114, Q7LG56, Q9Y305, Q14643, P10515, A0FGR8, P40926, P62917, P31153, Q8TEM1, Q12904, Q53GQ0, Q8IV08, O00763, P11166, P18124, O95299, P62277, Q96RQ3, P50914, P27708, Q9P2J5, P62910, P40429, Q14571, Q92530, Q9UBM7, P62753, Q9NVE7, P04406, P26373, P18077, Q8N1F7, P19367, Q9HCC0, P17858, P16152, P00558, Q92621, P05165, P05166, P62841, P46776, P27635, P56192, P46778	48	131	2118	10946	30.3797	1.89365	2.52051e-06	4.8879e-06	0.00355208	0.000650081	9.36419e-05	0.00827084	0.000976236
Reactome_N T205I	DAVID Reactome	R-HSA-196780~Biotin transport and metabolism	720010246	Q96RQ3, P05165, O00763, P05166, Q9HCC0	5	131	11	10946	3.16456	37.9806	9.91891e-08	5.87717e-06	0.00426945	0.00150872	0.000109707	0.00968979	0.00117382
Reactome_N T205I	DAVID Reactome	R-HSA-199977~ER to Golgi Anterograde Transport	720010271	P84085, Q14204, O15020, Q9BUF5, Q9Y678, Q13813, P18085, P04350, Q01082, O75396, P68371	11	131	154	10946	6.96203	5.96838	2.22601e-06	1.42475e-05	0.0103186	0.00172145	0.000259304	0.0229028	0.00284557
Reactome_N T205I	DAVID Reactome	R-HSA-2995410~Nuclear Envelope (NE) Reassembly	720010490	Q9BUF5, P20700, Q92973, Q92621, Q8N1F7, P04350, P02545, P68371	8	131	75	10946	5.06329	8.91277	2.92344e-06	2.8764e-05	0.0207227	0.00301245	0.000510736	0.0451103	0.00574482
Reactome_N T205I	DAVID Reactome	R-HSA-532668~N-glycan trimming in the ER and Calnexin/Calreticulin cycle	720010950	Q14697, P27824, P14314, P30101, P27797, Q14165	6	131	35	10946	3.79747	14.3241	3.19805e-06	5.33528e-05	0.0380972	0.0106689	0.000895174	0.0790655	0.0106556
Reactome_N T205I	DAVID Reactome	R-HSA-9694516~SARS-CoV-2 Infection	720012126	Q14697, Q8TEM1, Q8N1F7, P14314, P10321, P17302, P62277, P61088, Q92621, P27824, Q9UN86, P62841, P62753, P62633	14	131	299	10946	8.86076	3.91238	1.31613e-05	5.42173e-05	0.0387024	0.00676827	0.000895174	0.0790655	0.0108283
Reactome_N T205I	DAVID Reactome	R-HSA-199991~Membrane Trafficking	720010272	P04114, P50395, Q14204, O15020, Q9Y678, Q13813, Q9NP72, P18085, Q01082, P68371, O75396, O00159, P36383, P17302, P84085, Q9BUF5, Q00610, P61026, P04350, P02786, P05067	21	131	634	10946	13.2911	2.76767	1.90303e-05	5.48138e-05	0.0391198	0.00489782	0.000895174	0.0790655	0.0109474
Reactome_N T205I	DAVID Reactome	R-HSA-3371599~Defective HLCS causes multiple carboxylase deficiency	720010558	Q96RQ3, P05165, P05166, Q9HCC0	4	131	7	10946	2.53165	47.747	6.67035e-07	5.53336e-05	0.0394833	0.0104429	0.000895174	0.0790655	0.0110512
Reactome_N T205I	DAVID Reactome	R-HSA-948021~Transport to the Golgi and subsequent modification	720011903	P84085, Q14204, O15020, Q9BUF5, Q9Y678, Q13813, P18085, P04350, Q01082, O75396, P68371	11	131	185	10946	6.96203	4.96827	1.30204e-05	6.88104e-05	0.0488616	0.0100273	0.001089	0.0961849	0.0137427
Reactome_N T205I	DAVID Reactome	R-HSA-9013424~RHOV GTPase cycle	720011795	Q13813, Q00610, Q01082, P67936, P60953, Q93008	6	131	38	10946	3.79747	13.1933	5.28163e-06	8.01743e-05	0.0566984	0.022899	0.00124185	0.109685	0.0160122
Reactome_N T205I	DAVID Reactome	R-HSA-3323169~Defects in biotin (Btn) metabolism	720010537	Q96RQ3, P05165, P05166, Q9HCC0	4	131	8	10946	2.53165	41.7786	1.32169e-06	8.77647e-05	0.061897	0.0232542	0.0013311	0.117568	0.0175281
Reactome_N T205I	DAVID Reactome	R-HSA-70326~Glucose metabolism	720011454	P17858, P04406, P00558, P40926, Q8TEM1, Q92621, Q8N1F7, P19367	8	131	91	10946	5.06329	7.34569	1.25481e-05	0.000100242	0.0703804	0.0192371	0.00148931	0.131542	0.0200199
Reactome_N T205I	DAVID Reactome	R-HSA-168249~Innate Immune System	720010044	P04114, P50395, Q14204, Q14643, Q13813, P78527, Q8IV08, P14314, Q7Z6Z7, P61088, Q14571, P61026, Q92530, P60953, Q96CS3, Q5T4S7, Q13685, Q9NP72, Q6IAA8, P14625, P68371, O00159, P10321, P84095, P17858, P05067, Q6SZW1, Q14165	28	131	1069	10946	17.7215	2.18859	5.19965e-05	0.000117756	0.0821592	0.0133259	0.00171453	0.151434	0.0235175
Reactome_N T205I	DAVID Reactome	R-HSA-9705683~SARS-CoV-2-host interactions	720012173	P17302, P62277, P61088, Q8TEM1, Q92621, Q8N1F7, Q9UN86, P62841, P62753, P62633, P10321	11	131	203	10946	6.96203	4.52773	3.09753e-05	0.00014874	0.102633	0.00795989	0.00212319	0.187529	0.029705
Reactome_N T205I	DAVID Reactome	R-HSA-8856688~Golgi-to-ER retrograde transport	720011624	P84085, Q14204, Q9BUF5, Q9Y678, Q9NP72, P18085, P04350, O75396, P68371	9	131	133	10946	5.6962	5.65425	2.9776e-05	0.00018039	0.123077	0.00765289	0.00252546	0.223059	0.0360252
Reactome_N T205I	DAVID Reactome	R-HSA-70171~Glycolysis	720011450	P17858, P04406, P00558, Q8TEM1, Q92621, Q8N1F7, P19367	7	131	71	10946	4.43038	8.23804	2.10689e-05	0.00019032	0.129394	0.0215086	0.0026142	0.230897	0.0380081
Reactome_N T205I	DAVID Reactome	R-HSA-168256~Immune System	720010046	P04114, P50395, Q14204, O15020, P55786, Q14643, Q13813, O94822, Q8TEM1, P78527, Q8IV08, P14314, P30101, Q7Z6Z7, P61088, Q00610, Q14571, P61026, Q92530, P27824, P60953, Q96CS3, Q5T4S7, Q13685, Q9NP72, Q6IAA8, P14625, Q8N1F7, P68371, O75396, O00159, P10321, P84095, Q9BUF5, P20700, P17858, Q92621, P04350, P05067, P27797, Q6SZW1, Q14165	42	131	2024	10946	26.5823	1.7339	0.000124563	0.000222015	0.149257	0.0316284	0.00297753	0.262988	0.0443372
Reactome_N T205I	DAVID Reactome	R-HSA-190828~Gap junction trafficking	720010195	P36383, P17302, Q9BUF5, Q00610, P04350, P68371	6	131	47	10946	3.79747	10.6669	1.88095e-05	0.000224951	0.151073	0.105613	0.00297753	0.262988	0.0449234
Reactome_N T205I	DAVID Reactome	R-HSA-901042~Calnexin/calreticulin cycle	720011774	Q14697, P27824, P14314, P30101, P27797	5	131	26	10946	3.16456	16.0687	1.22254e-05	0.000231886	0.15535	0.0462107	0.00301452	0.266255	0.0463082
Reactome_N T205I	DAVID Reactome	R-HSA-157858~Gap junction trafficking and regulation	720009924	P36383, P17302, Q9BUF5, Q00610, P04350, P68371	6	131	49	10946	3.79747	10.2315	2.40213e-05	0.00027439	0.181092	0.0244855	0.00350449	0.309532	0.0547953
Reactome_N T205I	DAVID Reactome	R-HSA-9716542~Signaling by Rho GTPases, Miro GTPases and RHOBTB3	720012192	Q96CS3, Q14204, Q13813, Q6IAA8, O95140, Q01082, Q6NZI2, P68371, Q7Z406, P17302, P84095, Q9BUF5, P20700, Q00610, P08134, P04350, P02786, P67936, P60953, Q93008, Q92974	21	131	723	10946	13.2911	2.42697	0.000128021	0.000323401	0.209804	0.0324918	0.00405924	0.358529	0.0645811
Reactome_N T205I	DAVID Reactome	R-HSA-9679506~SARS-CoV Infections	720012097	Q14697, Q8TEM1, Q8N1F7, P14314, P10321, P17302, P62277, P61088, Q92621, P27824, Q9UN86, P05023, P62841, P62753, P62633	15	131	414	10946	9.49367	3.02744	0.000124056	0.000393714	0.249248	0.0315017	0.00485803	0.429081	0.0786193
Reactome_N T205I	DAVID Reactome	R-HSA-194315~Signaling by Rho GTPases	720010232	Q96CS3, Q14204, Q13813, Q6IAA8, Q01082, Q6NZI2, P68371, Q7Z406, P17302, P84095, Q9BUF5, P20700, Q00610, P08134, P04350, P02786, P67936, P60953, Q93008, Q92974	20	131	707	10946	12.6582	2.36371	0.000267796	0.000659821	0.381531	0.0667673	0.00800582	0.707108	0.13174
Reactome_N T205I	DAVID Reactome	R-HSA-176033~Interactions of Vpr with host cellular proteins	720010112	Q8TEM1, Q92621, P12236, Q8N1F7, P12235	5	131	36	10946	3.16456	11.6052	6.36564e-05	0.000833562	0.455064	0.218358	0.00978763	0.864485	0.166415
Reactome_N T205I	DAVID Reactome	R-HSA-190861~Gap junction assembly	720010197	P36383, P17302, Q9BUF5, P04350, P68371	5	131	36	10946	3.16456	11.6052	6.36564e-05	0.000833562	0.455064	0.218358	0.00978763	0.864485	0.166415
Reactome_N T205I	DAVID Reactome	R-HSA-9012999~RHO GTPase cycle	720011779	Q96CS3, Q13813, Q6IAA8, Q01082, Q6NZI2, P17302, P84095, P20700, Q00610, P08134, P02786, P67936, P60953, Q93008, Q92974	15	131	449	10946	9.49367	2.79144	0.000299898	0.000877695	0.472308	0.0744669	0.0101423	0.895806	0.175221
Reactome_N T205I	DAVID Reactome	R-HSA-6811434~COPI-dependent Golgi-to-ER retrograde traffic	720011391	P84085, Q9BUF5, Q9Y678, P18085, P04350, O75396, P68371	7	131	99	10946	4.43038	5.90809	0.000178764	0.00113639	0.562973	0.168481	0.0129264	1.14171	0.226837
Reactome_N T205I	DAVID Reactome	R-HSA-190840~Microtubule-dependent trafficking of connexons from Golgi to the plasma membrane	720010196	P17302, Q9BUF5, P04350, P68371	4	131	18	10946	2.53165	18.5683	5.26442e-05	0.00117231	0.574267	0.343649	0.0131299	1.15969	0.234004
Reactome_N T205I	DAVID Reactome	R-HSA-9013420~RHOU GTPase cycle	720011792	Q13813, Q00610, Q01082, P60953, Q93008	5	131	40	10946	3.16456	10.4447	0.000106931	0.00124676	0.596754	0.26176	0.0137522	1.21465	0.248856
Reactome_N T205I	DAVID Reactome	R-HSA-597592~Post-translational protein modification	720011312	P04114, Q14204, O15020, O43852, Q13813, P18085, Q8TEM1, P78527, P14314, P30101, P84085, P61088, P61026, Q92530, P27824, Q93008, Q14697, Q9Y678, Q9NP72, P14625, Q8N1F7, Q01082, P68371, O75396, Q9BUF5, Q15293, Q92621, P04350, P05067, P27797, Q14165	31	131	1441	10946	19.6203	1.79755	0.000704912	0.00131204	0.615492	0.166342	0.0142562	1.25916	0.261876
Reactome_N T205I	DAVID Reactome	R-HSA-9683686~Maturation of spike protein	720012110	Q14697, P27824, P14314	3	131	5	10946	1.89873	50.1344	1.64629e-05	0.00136733	0.630681	0.320582	0.014561	1.28609	0.272904
Reactome_N T205I	DAVID Reactome	R-HSA-190872~Transport of connexons to the plasma membrane	720010198	P17302, Q9BUF5, P04350, P68371	4	131	19	10946	2.53165	17.591	6.60662e-05	0.0013801	0.634103	0.390017	0.014561	1.28609	0.275451
Reactome_N T205I	DAVID Reactome	R-HSA-9646399~Aggrephagy	720011981	Q14204, Q9BUF5, P61088, P04350, P68371	5	131	43	10946	3.16456	9.71596	0.000152002	0.00163804	0.696833	0.561155	0.0170356	1.50466	0.326891
Reactome_N T205I	DAVID Reactome	R-HSA-1280218~Adaptive Immune System	720009816	Q14204, O15020, P55786, Q5T4S7, Q14643, O94822, P30101, P68371, O75396, P10321, Q9BUF5, P61088, Q7Z6Z7, Q00610, Q14571, P04350, Q92530, P27824, P60953, P27797	20	131	769	10946	12.6582	2.17314	0.000785726	0.0017823	0.727106	0.183556	0.0182749	1.61411	0.355655
Reactome_N T205I	DAVID Reactome	R-HSA-68882~Mitotic Anaphase	720011406	Q14204, Q9BUF5, P20700, Q92973, Q92621, Q8N1F7, P04350, P02545, Q92530, P68371	10	131	236	10946	6.32911	3.54056	0.000529247	0.00198305	0.764276	0.239032	0.0200508	1.77097	0.395674
Reactome_N T205I	DAVID Reactome	R-HSA-3000484~Scavenging by Class F Receptors	720010497	P04114, Q9Y4L1, P27797	3	131	6	10946	1.89873	41.7786	3.26372e-05	0.00203504	0.773049	0.435941	0.0200791	1.77347	0.406038
Reactome_N T205I	DAVID Reactome	R-HSA-2555396~Mitotic Metaphase and Anaphase	720010449	Q14204, Q9BUF5, P20700, Q92973, Q92621, Q8N1F7, P04350, P02545, Q92530, P68371	10	131	237	10946	6.32911	3.52562	0.00054703	0.002041	0.774034	0.13166	0.0200791	1.77347	0.407226
Reactome_N T205I	DAVID Reactome	R-HSA-3296482~Defects in vitamin and cofactor metabolism	720010527	Q96RQ3, P05165, P05166, Q9HCC0	4	131	22	10946	2.53165	15.1922	0.00012126	0.00213706	0.789327	0.620879	0.0207438	1.83218	0.426372
Reactome_N T205I	DAVID Reactome	R-HSA-9663891~Selective autophagy	720012015	Q14204, Q9BUF5, P61088, O95140, P04350, P68371	6	131	81	10946	3.79747	6.18943	0.000407932	0.00272533	0.86286	0.270797	0.0261058	2.30578	0.543579
Reactome_N T205I	DAVID Reactome	R-HSA-6811442~Intra-Golgi and retrograde Golgi-to-ER traffic	720011395	P84085, Q14204, Q9BUF5, Q9Y678, Q9NP72, P18085, P04350, O75396, P68371	9	131	202	10946	5.6962	3.72285	0.000705303	0.0027859	0.868791	0.166426	0.0263394	2.32641	0.555642
Reactome_N T205I	DAVID Reactome	R-HSA-373760~L1CAM interactions	720010601	O15020, Q9BUF5, Q13813, Q00610, P04350, Q01082, P68371	7	131	119	10946	4.43038	4.91513	0.000552153	0.00290368	0.879602	0.347852	0.027101	2.39367	0.579099
Reactome_N T205I	DAVID Reactome	R-HSA-6811436~COPI-independent Golgi-to-ER retrograde traffic	720011392	Q14204, Q9BUF5, Q9NP72, P04350, P68371	5	131	51	10946	3.16456	8.19189	0.000343629	0.00308347	0.894414	0.587993	0.0284148	2.50971	0.614901
Reactome_N T205I	DAVID Reactome	R-HSA-2980766~Nuclear Envelope Breakdown	720010486	P20700, Q8TEM1, Q92621, Q8N1F7, P02545	5	131	52	10946	3.16456	8.03435	0.000376572	0.00331013	0.910523	0.767208	0.0301222	2.66052	0.660027
Reactome_N T205I	DAVID Reactome	R-HSA-2132295~MHC class II antigen presentation	720010366	Q14204, O15020, Q9BUF5, Q00610, P04350, P27824, P68371	7	131	123	10946	4.43038	4.75529	0.000673022	0.00342192	0.917539	0.159449	0.030755	2.71641	0.682279
Reactome_N T205I	DAVID Reactome	R-HSA-196849~Metabolism of water-soluble vitamins and cofactors	720010253	Q9NVE7, Q96RQ3, P05165, O00763, P11166, P05166, Q9HCC0	7	131	124	10946	4.43038	4.71694	0.000706294	0.0035616	0.925539	0.421238	0.0316201	2.79282	0.71008
Reactome_N T205I	DAVID Reactome	R-HSA-9705671~SARS-CoV-2 activates/modulates innate and adaptive immune responses	720012171	P61088, Q8TEM1, Q92621, Q8N1F7, Q9UN86, P62633, P10321	7	131	126	10946	4.43038	4.64207	0.000776747	0.00385365	0.939848	0.330321	0.0338007	2.98542	0.768194
Reactome_N T205I	DAVID Reactome	R-HSA-3371497~HSP90 chaperone cycle for steroid hormone receptors (SHR) in the presence of ligand	720010552	Q14204, Q9BUF5, P54652, P04350, P68371	5	131	55	10946	3.16456	7.59611	0.000489823	0.00405772	0.948182	0.829611	0.0351669	3.10609	0.80879
Reactome_N T205I	DAVID Reactome	R-HSA-1266738~Developmental Biology	720009813	Q9Y3U8, O15020, Q13813, P62917, P18124, Q7Z406, P62277, P50914, Q00610, P62910, P40429, Q92530, P62753, P60953, P26373, P18077, Q01082, P68371, Q9BUF5, P08134, P04350, P62841, P46776, P27635, P46778	25	131	1152	10946	15.8228	1.81331	0.00227369	0.00429609	0.956469	0.444163	0.0367947	3.24986	0.856201
Reactome_N T205I	DAVID Reactome	R-HSA-6798695~Neutrophil degranulation	720011351	Q96CS3, P50395, Q14204, Q5T4S7, Q13813, Q9NP72, Q6IAA8, P68371, P10321, P84095, P17858, Q7Z6Z7, P61026, Q14165	14	131	482	10946	8.86076	2.42697	0.00185471	0.0047376	0.968481	0.380572	0.0399402	3.52768	0.943985
Reactome_N T205I	DAVID Reactome	R-HSA-983170~Antigen Presentation: Folding, assembly and peptide loading of class I MHC	720012287	P27824, P30101, P27797, P10321	4	131	29	10946	2.53165	11.5251	0.000368995	0.00477307	0.969288	0.89825	0.0399402	3.52768	0.951035
Reactome_N T205I	DAVID Reactome	R-HSA-9609690~HCMV Early Events	720011916	Q14204, Q9BUF5, Q8TEM1, Q92621, Q8N1F7, P04350, P68371	7	131	135	10946	4.43038	4.3326	0.00116556	0.00539229	0.980478	0.25984	0.044609	3.94005	1.07408
Reactome_N T205I	DAVID Reactome	R-HSA-1632852~Macroautophagy	720009964	Q14204, Q9BUF5, P61088, Q6IAA8, O95140, P04350, P68371	7	131	136	10946	4.43038	4.30074	0.00121677	0.00558746	0.983077	0.610291	0.0457042	4.03678	1.11285
Reactome_N WT	DAVID Reactome	R-HSA-1430728~Metabolism	720009866	P06733, P36969, P08559, P13804, P10515, P40926, P53384, P31153, P31350, P15104, P30520, P11586, Q96T21, P42765, Q00796, O00170, Q15181, P31939, Q9UBQ7, P61764, Q99707, P34913, Q9NVE7, P49591, P04406, P52209, O75131, P34896, Q9Y617, P38117, Q96KP4, P16152, P04075, Q13232, P49748, P00374, P21796, Q99714, P06576	39	103	2118	10946	24.375	1.95685	8.78815e-06	1.76068e-05	0.0112748	0.00226478	0.0113388	1.11803	0.00351587
Reactome_N WT	DAVID Reactome	R-HSA-9725370~Signaling by ALK fusions and activated point mutants	720012204	P29353, Q00610, P31939, P49589, P26038, P67936	6	103	55	10946	3.75	11.5933	1.19649e-05	0.000153059	0.0938744	0.0422968	0.0328566	3.23974	0.030562
Reactome_N WT	DAVID Reactome	R-HSA-9700206~Signaling by ALK in cancer	720012142	P29353, Q00610, P31939, P49589, P26038, P67936	6	103	55	10946	3.75	11.5933	1.19649e-05	0.000153059	0.0938744	0.0422968	0.0328566	3.23974	0.030562
Reactome_NSP12 P323L	DAVID Reactome	R-HSA-1430728~Metabolism	720009866	P04114, O75947, P30085, Q04760, P12532, P30520, Q9P2R7, P36871, P07195, P60174, P22695, Q9UJS0, P24752, Q14573, O00154, P52209, P37268, O75131, P13995, P19623, P30084, P47985, P46778, P07602, O95336, P31153, Q01469, O00170, P23526, P18859, P31040, O94925, Q8NFH5, P54886, P49591, P43490, P22570, P26373, Q01581, Q9Y617, P11310, P34897, P21912, P15121, Q9NPF0, P00558, P08397, P07741, P62269, P40926,…	196	456	2118	10946	34.3257	2.22137	1.78212e-32	4.17895e-32	4.83086e-29	4.59788e-30	4.83086e-29	4.56341e-27	8.35067e-30
Reactome_NSP12 P323L	DAVID Reactome	R-HSA-1428517~The citric acid (TCA) cycle and respiratory electron transport	720009865	P30049, P31930, O75947, O75306, P08559, O75964, P10515, P40926, Q04760, P50213, O95299, P35613, Q9P2R7, O96000, P19404, O43819, P24539, P18859, P42704, P07195, P31040, P23368, P22695, P20674, P07954, Q13423, P10606, P53597, P14927, Q12931, O95182, Q16718, P11177, P21912, Q99798, P00338, P47985, P49821, P21796, P09622, P48735, P06576	42	456	178	10946	7.35552	5.66396	9.9758e-21	7.03604e-20	8.13366e-17	2.57376e-18	4.06683e-17	3.84168e-15	1.40599e-17
Reactome_NSP12 P323L	DAVID Reactome	R-HSA-71406~Pyruvate metabolism and Citric Acid (TCA) cycle	720011471	P07954, Q13423, P53597, P08559, P10515, P40926, Q04760, P11177, P50213, P35613, Q9P2R7, P21912, Q99798, P00338, P07195, P31040, P23368, P21796, P09622, P48735	20	456	55	10946	3.50263	8.72887	2.14639e-14	2.76542e-13	3.19699e-10	7.73954e-11	1.06561e-10	1.00661e-08	5.52669e-11
Reactome_NSP12 P323L	DAVID Reactome	R-HSA-71403~Citric acid cycle (TCA cycle)	720011470	P21912, P07954, Q13423, Q99798, P53597, P40926, P31040, P23368, P50213, Q9P2R7, P48735, P09622	12	456	22	10946	2.10158	13.0933	1.04858e-11	2.64863e-10	3.06182e-07	8.38657e-08	7.65455e-08	7.23077e-06	5.29269e-08
Reactome_NSP12 P323L	DAVID Reactome	R-HSA-379724~tRNA Aminoacylation	720010617	P54577, Q9NP81, P49591, Q12904, Q5JTZ9, O43776, Q6PI48, P12081, Q15181, P41250, P49589, P49588, Q9NSE4, P56192, Q9Y2Z4	15	456	42	10946	2.62697	8.57299	5.51139e-11	6.84742e-10	7.91561e-07	1.99071e-07	1.58312e-07	1.49548e-05	1.3683e-07
Reactome_NSP12 P323L	DAVID Reactome	R-HSA-163200~Respiratory electron transport, ATP synthesis by chemiosmotic coupling, and heat production by uncoupling proteins.	720009961	P30049, O75947, P10606, P31930, O75306, O75964, P14927, Q12931, O95182, Q16718, O95299, O96000, P21912, P19404, O43819, P24539, P18859, P42704, P31040, P49821, P22695, P47985, P20674, P06576	24	456	127	10946	4.20315	4.53626	3.74791e-10	2.01072e-09	2.32439e-06	9.66961e-08	3.87399e-07	3.65952e-05	4.01797e-07
Reactome_NSP12 P323L	DAVID Reactome	R-HSA-70895~Branched-chain amino acid catabolism	720011459	P26440, P54687, Q6NVY1, Q96RQ3, P31937, P30084, Q9HCC0, P45954, P24752, Q99714, P09622	11	456	21	10946	1.92644	12.5737	1.40819e-10	3.26337e-09	3.77245e-06	1.01727e-06	5.38923e-07	5.09086e-05	6.52111e-07
Reactome_NSP12 P323L	DAVID Reactome	R-HSA-71291~Metabolism of amino acids and derivatives	720011466	P26440, P08559, P10515, P49189, P31937, Q12904, Q06323, P12277, P18124, P12532, Q96RQ3, Q6NVY1, P50914, P00505, P23526, P04181, Q9UBQ7, O94925, Q9UJS0, P00367, P49419, P25325, P45954, P24752, P54886, P54687, P49591, P26373, P36578, P52788, P11177, Q9HCC0, Q9Y617, P19623, P30084, P08195, P62269, Q99757, P56192, P46778, P09622, Q99714	43	456	376	10946	7.53065	2.74518	1.40217e-09	4.20785e-09	4.86426e-06	3.61761e-07	6.08034e-07	5.74371e-05	8.40842e-07
Reactome_NSP12 P323L	DAVID Reactome	R-HSA-6798695~Neutrophil degranulation	720011351	Q9H0E2, P09429, P07602, P50395, P00491, P14618, Q13813, P28482, P04439, Q13217, Q7Z5G4, P13987, O00264, P51148, P51149, Q01469, P36871, O60784, Q99829, P61586, P02765, P00387, P61106, P06744, P11717, Q96CS3, O94973, Q9Y315, P13639, Q9NP72, Q8IUR7, Q96G03, Q86VP6, O75131, Q9UHA4, P68371, P12268, Q99536, P68402, Q93050, Q8NBS9, P01889, P09960, P04075, P07686, P07741, Q14165	47	456	482	10946	8.23117	2.34068	4.02258e-08	1.00892e-07	0.000116624	1.03782e-05	1.2959e-05	0.00122415	2.01609e-05
Reactome_NSP12 P323L	DAVID Reactome	R-HSA-70326~Glucose metabolism	720011454	P06744, P06733, P14618, P04406, P40926, Q9BRR6, P40925, Q8TEM1, P19367, P00505, P00558, P60174, Q92621, Q9UJS0, P04075, Q01813, P09104, Q8NFH5	18	456	91	10946	3.15236	4.74812	2.89609e-08	1.64206e-07	0.000189804	4.48304e-05	1.89822e-05	0.00179313	3.28128e-05
Reactome_NSP12 P323L	DAVID Reactome	R-HSA-168249~Innate Immune System	720010044	Q9H0E2, P04114, P07947, P04439, P28482, P07948, P13987, O00264, Q3LXA3, Q8IV08, P51148, P14314, P35579, P51149, P36871, O94826, P61586, P61421, P02765, P00387, Q14573, P61106, P06744, Q96CS3, Q13685, Q9Y315, P13639, Q9NP72, P60709, Q13404, Q8IUR7, Q86VP6, O75131, P12268, O00159, Q86VP1, Q93050, Q15075, P07686, P05067, Q6SZW1, P07602, P09429, P50395, P00491, Q13813, P14618, O15145, Q7Z5G4, Q13217,…	80	456	1069	10946	14.0105	1.7964	1.1376e-07	2.10686e-07	0.000243524	2.93496e-05	2.21412e-05	0.00209154	4.21008e-05
Reactome_NSP12 P323L	DAVID Reactome	R-HSA-9609507~Protein localization	720011913	Q5JRX3, O43681, O75439, Q9Y2Q3, Q10713, P14735, Q8NBU5, O43765, O75431, O00116, Q9NX63, Q5JTJ3, Q99798, O94826, O60220, Q9UJS0, P46379, P05067, P10809, Q93008, P21796, Q13011, Q9HAV7, P06576	24	456	163	10946	4.20315	3.53439	6.36207e-08	2.54532e-07	0.000294196	3.28278e-05	2.28071e-05	0.00215445	5.08625e-05
Reactome_NSP12 P323L	DAVID Reactome	R-HSA-379716~Cytosolic tRNA aminoacylation	720010616	P54577, P49591, P12081, Q15181, P41250, Q12904, P49589, P49588, O43776, P56192	10	456	24	10946	1.75131	10.0018	1.65547e-08	2.56482e-07	0.000296449	0.000123855	2.28071e-05	0.00215445	5.1252e-05
Reactome_NSP12 P323L	DAVID Reactome	R-HSA-70263~Gluconeogenesis	720011452	P06744, P06733, P00505, P04406, P00558, P40926, P40925, P60174, Q9UJS0, P04075, P09104	11	456	34	10946	1.92644	7.76612	6.97921e-08	7.4483e-07	0.000860653	0.000306061	6.15017e-05	0.00580967	0.000148837
Reactome_NSP12 P323L	DAVID Reactome	R-HSA-611105~Respiratory electron transport	720011314	P10606, P31930, O75306, P14927, Q12931, O95182, Q16718, O95299, O96000, P21912, P19404, O43819, P42704, P31040, P49821, P22695, P47985, P20674	18	456	103	10946	3.15236	4.19494	2.1186e-07	1.0358e-06	0.00119667	0.000218616	7.9826e-05	0.00754065	0.000206982
Reactome_NSP12 P323L	DAVID Reactome	R-HSA-1268020~Mitochondrial protein import	720009814	Q5JRX3, O75439, Q10713, O75431, Q9NX63, Q5JTJ3, Q99798, O94826, O60220, Q9UJS0, P10809, P21796, Q9HAV7, P06576	14	456	64	10946	2.45184	5.25096	2.74668e-07	1.7605e-06	0.00203307	0.000566754	0.000120247	0.011359	0.000351796
Reactome_NSP12 P323L	DAVID Reactome	R-HSA-77289~Mitochondrial Fatty Acid Beta-Oxidation	720011569	P42126, P42765, Q16836, P07108, P30084, O00154, P22033, P05165, P05166, P49748, P11310	11	456	37	10946	1.92644	7.13644	1.86196e-07	1.76834e-06	0.00204212	0.000816321	0.000120247	0.011359	0.000353363
Reactome_NSP12 P323L	DAVID Reactome	R-HSA-15869~Metabolism of nucleotides	720009925	Q7LG56, P27144, P00491, P00492, O43598, P30085, P23919, Q9H773, P30520, P12268, P15531, P11172, P54819, P31939, P23921, Q13232, P07741	17	456	99	10946	2.97723	4.12197	5.98156e-07	2.86524e-06	0.00330674	0.000617107	0.000184012	0.0173824	0.000572551
Reactome_NSP12 P323L	DAVID Reactome	R-HSA-70171~Glycolysis	720011450	P06744, P06733, P14618, P04406, Q9BRR6, Q8TEM1, P19367, P00558, P60174, Q92621, P04075, Q01813, P09104, Q8NFH5	14	456	71	10946	2.45184	4.73326	1.05721e-06	5.96975e-06	0.00687729	0.00109044	0.000363212	0.0343103	0.00119291
Reactome_NSP12 P323L	DAVID Reactome	R-HSA-499943~Interconversion of nucleotide di- and triphosphates	720010908	P15531, Q7LG56, P27144, P54819, P30085, P23921, Q13232, P23919, Q9H773	9	456	30	10946	1.57618	7.20132	2.28653e-06	2.18611e-05	0.024955	0.0105625	0.0012034	0.113678	0.00436839
Reactome_NSP12 P323L	DAVID Reactome	R-HSA-3928663~EPHA-mediated growth cone collapse	720010694	P35580, P07947, P60660, P07948, P06241, P61586, O14950, P35579, Q7Z406	9	456	30	10946	1.57618	7.20132	2.28653e-06	2.18611e-05	0.024955	0.0105625	0.0012034	0.113678	0.00436839
Reactome_NSP12 P323L	DAVID Reactome	R-HSA-70268~Pyruvate metabolism	720011453	P08559, P00338, P10515, P07195, Q04760, P11177, P35613, P21796, P09622	9	456	31	10946	1.57618	6.96902	3.10423e-06	2.84046e-05	0.0323029	0.021392	0.00142764	0.13486	0.00567592
Reactome_NSP12 P323L	DAVID Reactome	R-HSA-8949613~Cristae formation	720011702	P30049, O75947, O75964, P24539, P18859, O75431, Q16891, P06576, Q9NX63	9	456	31	10946	1.57618	6.96902	3.10423e-06	2.84046e-05	0.0323029	0.021392	0.00142764	0.13486	0.00567592
Reactome_NSP12 P323L	DAVID Reactome	R-HSA-72766~Translation	720011493	P54577, Q9NP81, Q12904, O43776, P18124, P50914, Q6PI48, P12081, Q15181, P41250, Q9NSE4, P47813, Q14232, Q9Y2Z4, P43897, P49591, P04843, P13639, P26373, P36578, Q5JTZ9, P43307, Q96RP9, Q9UI10, P49589, P49588, P62269, P56192, P46778	29	456	292	10946	5.07881	2.384	1.24983e-05	3.22658e-05	0.0366128	0.00321939	0.00155414	0.14681	0.00644749
Reactome_NSP12 P323L	DAVID Reactome	R-HSA-71387~Metabolism of carbohydrates	720011469	P06733, O95336, P14618, P40926, P40925, Q9BRR6, Q8TEM1, Q3LXA3, Q00796, P36871, P00505, P60174, Q9UJS0, P11908, Q8NFH5, P06744, Q9Y315, P04406, P52209, Q96G03, P19367, P15121, Q7Z4W1, P00558, Q92621, P04075, P07686, Q01813, P09104	29	456	295	10946	5.07881	2.35975	1.51937e-05	3.88033e-05	0.0438662	0.00391233	0.00179426	0.169493	0.00775379
Reactome_NSP12 P323L	DAVID Reactome	R-HSA-76002~Platelet activation, signaling and aggregation	720011554	Q06481, P07602, P04899, O43852, P55145, P28482, P12814, P07948, Q9NUQ9, Q9BWS9, Q9NTK5, P06241, P61586, P02765, P60953, Q14573, Q9UBI6, Q13685, P07737, O75083, O43707, P63096, P04075, P08754, P05067, P10909	26	456	263	10946	4.55342	2.37306	3.80926e-05	9.80869e-05	0.107201	0.00977995	0.00436109	0.411965	0.0195995
Reactome_NSP12 P323L	DAVID Reactome	R-HSA-2682334~EPH-Ephrin signaling	720010471	O94973, P07947, O15145, P60709, P07948, P35579, Q7Z406, P35580, P60660, Q00610, P06241, P61586, O14950, P60953	14	456	92	10946	2.45184	3.65284	2.4835e-05	0.000103592	0.112865	0.0499684	0.00443528	0.418972	0.0206994
Reactome_NSP12 P323L	DAVID Reactome	R-HSA-8957275~Post-translational protein phosphorylation	720011718	Q06481, P04114, O43852, Q13217, P19022, P14625, P14314, P11047, P19823, Q15293, Q15084, Q8NBJ4, Q02818, P02765, P05067	15	456	108	10946	2.62697	3.33394	3.89535e-05	0.000146489	0.155789	0.0585191	0.00604789	0.571306	0.0292703
Reactome_NSP12 P323L	DAVID Reactome	R-HSA-446203~Asparagine N-linked glycosylation	720010831	O15020, Q13813, Q14746, Q14789, P34949, P13987, O95394, Q12907, P14314, P30101, O60547, P27824, Q9BVK6, P61923, Q9BT22, P53992, Q14697, Q9Y678, P04843, P49257, P54727, Q01082, P68371, O75396, P54920, P62820, P27797, Q14165	28	456	304	10946	4.90368	2.21093	6.86804e-05	0.000163687	0.17241	0.0175641	0.00652489	0.616365	0.0327064
Reactome_NSP12 P323L	DAVID Reactome	R-HSA-3296482~Defects in vitamin and cofactor metabolism	720010527	Q96EY8, Q96RQ3, Q9NPF0, P22033, P05165, P05166, Q9HCC0	7	456	22	10946	1.22592	7.63776	2.05668e-05	0.000210892	0.216369	0.151678	0.00812637	0.767647	0.0421375
Reactome_NSP12 P323L	DAVID Reactome	R-HSA-445355~Smooth Muscle Contraction	720010825	P05091, P60660, P14649, P09493, P04083, P08133, O14950, P67936, P06753	9	456	45	10946	1.57618	4.80088	8.11608e-05	0.000465485	0.416217	0.154243	0.0173581	1.63971	0.0929949
Reactome_NSP12 P323L	DAVID Reactome	R-HSA-9012999~RHO GTPase cycle	720011779	Q9NYL9, Q13813, Q15758, P12814, P12277, Q5VT25, P51149, Q00610, P61586, Q9BX68, P61604, P02786, P60953, Q93008, P80723, Q96CS3, P52565, P05556, O75955, O95202, P49257, Q9BXS4, O75976, P60709, P31948, Q15904, Q01082, Q16718, P34897, P17302, P20700, Q16643, Q9UM54, P67936, P06753	35	456	449	10946	6.1296	1.87117	0.000259035	0.000516928	0.449937	0.064655	0.018674	1.76402	0.10327
Reactome_NSP12 P323L	DAVID Reactome	R-HSA-163210~Formation of ATP by chemiosmotic coupling	720009962	P30049, O75947, O75964, P24539, P18859, P06576	6	456	18	10946	1.05079	8.00146	6.12141e-05	0.000663339	0.53563	0.387132	0.0211149	1.99459	0.132509
Reactome_NSP12 P323L	DAVID Reactome	R-HSA-381426~Regulation of Insulin-like Growth Factor (IGF) transport and uptake by Insulin-like Growth Factor Binding Proteins (IGFBPs)	720010637	Q06481, P04114, O43852, Q13217, P19022, P14625, P14314, P11047, P19823, Q15293, Q15084, Q8NBJ4, Q02818, P02765, P05067	15	456	125	10946	2.62697	2.88053	0.000210926	0.000675145	0.541929	0.103135	0.0211149	1.99459	0.134867
Reactome_NSP12 P323L	DAVID Reactome	R-HSA-9664422~FCGR3A-mediated phagocytosis	720012020	P07947, P60709, O15145, P28482, P07948, P06241, P35579, Q9Y4I1, P60953, O00159	10	456	59	10946	1.75131	4.06854	0.00014295	0.000675824	0.542289	0.445749	0.0211149	1.99459	0.135002
Reactome_NSP12 P323L	DAVID Reactome	R-HSA-9664417~Leishmania phagocytosis	720012018	P07947, P60709, O15145, P28482, P07948, P06241, P35579, Q9Y4I1, P60953, O00159	10	456	59	10946	1.75131	4.06854	0.00014295	0.000675824	0.542289	0.445749	0.0211149	1.99459	0.135002
Reactome_NSP12 P323L	DAVID Reactome	R-HSA-9664407~Parasite infection	720012017	P07947, P60709, O15145, P28482, P07948, P06241, P35579, Q9Y4I1, P60953, O00159	10	456	59	10946	1.75131	4.06854	0.00014295	0.000675824	0.542289	0.445749	0.0211149	1.99459	0.135002
Reactome_NSP12 P323L	DAVID Reactome	R-HSA-196780~Biotin transport and metabolism	720010246	Q96RQ3, P05165, O00763, P05166, Q9HCC0	5	456	11	10946	0.875657	10.9111	4.60433e-05	0.000770062	0.589564	0.503855	0.0234261	2.21291	0.15382
Reactome_NSP12 P323L	DAVID Reactome	R-HSA-2029480~Fcgamma receptor (FCGR) dependent phagocytosis	720010301	P07947, P60709, O15145, P28482, P07948, P06241, Q8IV08, P35579, Q9Y4I1, P60953, Q14573, O00159	12	456	86	10946	2.10158	3.34945	0.000219053	0.000830251	0.617172	0.155968	0.0246095	2.3247	0.165838
Reactome_NSP12 P323L	DAVID Reactome	R-HSA-1643685~Disease	720009979	P30086, P18124, P14314, P36871, Q8WUM4, Q92614, Q14573, P62633, O94905, P23284, Q14697, P13639, Q13404, P36578, Q01082, P12268, O00159, Q7Z4W1, P05067, P67936, P46778, O15145, Q7Z5G4, P34949, Q8TEM1, P23526, P06241, P22033, Q8NFH5, P05556, Q9BT22, Q96EY8, P22570, P40937, P26373, O75477, P68371, Q02790, P17655, P17302, P20700, Q9NPF0, P00558, P01889, P49589, P05165, P07741, P05166, P62269, Q9P2E9,…	99	456	1748	10946	17.338	1.35952	0.000608695	0.000855713	0.628285	0.145374	0.0247301	2.3361	0.170922
Reactome_NSP12 P323L	DAVID Reactome	R-HSA-114608~Platelet degranulation	720009773	Q06481, P07602, O43852, P07737, P55145, P12814, O75083, O43707, Q9NUQ9, Q9BWS9, Q9NTK5, P04075, P02765, P05067, P10909	15	456	129	10946	2.62697	2.79121	0.00029887	0.000924532	0.656735	0.206546	0.0260673	2.46241	0.184661
Reactome_NSP12 P323L	DAVID Reactome	R-HSA-381038~XBP1(S) activates chaperone genes	720010631	P43307, Q15084, P49840, Q13217, P02545, P61421, P49748, Q9Y4L1, Q969H8	9	456	50	10946	1.57618	4.32079	0.000190738	0.000966762	0.673106	0.418048	0.0265889	2.51168	0.193092
Reactome_NSP12 P323L	DAVID Reactome	R-HSA-392499~Metabolism of proteins	720010689	P04114, P54577, P13987, O95394, P18124, P14314, P11047, P41250, Q8NBJ4, P45974, P09936, Q9Y678, Q14697, P13639, P49257, Q8WUD1, P36578, Q86VP6, Q01082, P43307, Q9UI10, P05067, P46778, Q06481, O15020, Q13813, Q14746, P34949, Q8TEM1, O43776, P30101, P19823, O60547, P12081, Q15286, P22314, Q93008, Q8NFH5, Q9Y2Z4, Q14232, P43897, Q9BT22, P49591, P26373, P68371, P12004, P54920, Q15293, P49589, P49588,…	109	456	1970	10946	19.0893	1.32816	0.000721168	0.000989032	0.681422	0.169833	0.0265889	2.51168	0.197538
Reactome_NSP12 P323L	DAVID Reactome	R-HSA-5653656~Vesicle-mediated transport	720011168	P04114, P50395, O15020, Q13813, O15145, Q14746, Q14789, P13987, Q12907, P51148, P35579, Q9Y4I1, P51149, Q9UHD9, Q00610, Q15286, P61006, Q9BVK6, P61923, P02786, Q10471, P61106, P11717, O94973, P53992, Q9Y678, P49257, O75976, Q9NP72, P60709, Q15907, P14625, Q01082, P68371, O75396, Q9Y4L1, P54920, O00159, P17302, P68402, Q8NBS9, P31150, P05067, Q9UM54, P62820, P27797	46	456	673	10946	8.05604	1.64072	0.000589987	0.00102321	0.693774	0.141236	0.0268824	2.53941	0.20436
Reactome_NSP12 P323L	DAVID Reactome	R-HSA-5625900~RHO GTPases activate CIT	720011140	P35580, P60660, P61586, O14950, P35579, Q7Z406	6	456	20	10946	1.05079	7.20132	0.000119034	0.00112051	0.726386	0.648036	0.0281589	2.66	0.223783
Reactome_NSP12 P323L	DAVID Reactome	R-HSA-5627117~RHO GTPases Activate ROCKs	720011145	P35580, P60660, P61586, O14950, P35579, Q7Z406	6	456	20	10946	1.05079	7.20132	0.000119034	0.00112051	0.726386	0.648036	0.0281589	2.66	0.223783
Reactome_NSP12 P323L	DAVID Reactome	R-HSA-75153~Apoptotic execution phase	720011542	P09429, P26583, Q15149, P20700, Q13813, O00273, Q16625, P02545, Q9P289	9	456	52	10946	1.57618	4.15461	0.000260154	0.00126029	0.767255	0.63466	0.0303519	2.86715	0.251681
Reactome_NSP12 P323L	DAVID Reactome	R-HSA-381070~IRE1alpha activates chaperones	720010633	P43307, Q15084, P49840, Q13217, P02545, P61421, P49748, Q9Y4L1, Q969H8	9	456	52	10946	1.57618	4.15461	0.000260154	0.00126029	0.767255	0.63466	0.0303519	2.86715	0.251681
Reactome_NSP12 P323L	DAVID Reactome	R-HSA-76005~Response to elevated platelet cytosolic Ca2+	720011555	Q06481, P07602, O43852, P07737, P55145, P12814, O75083, O43707, Q9NUQ9, Q9BWS9, Q9NTK5, P04075, P02765, P05067, P10909	15	456	134	10946	2.62697	2.68706	0.000451756	0.00134141	0.788114	0.372692	0.0309942	2.92782	0.26787
Reactome_NSP12 P323L	DAVID Reactome	R-HSA-8873719~RAB geranylgeranylation	720011646	Q8WUD1, Q9NP72, P61006, Q15286, Q15907, P51148, P62820, P61019, P61106, P51149	10	456	65	10946	1.75131	3.69298	0.000325809	0.00137987	0.797341	0.396153	0.0309942	2.92782	0.275546
Reactome_NSP12 P323L	DAVID Reactome	R-HSA-5663205~Infectious disease	720011233	P06733, P07947, P04439, P28482, P07948, Q3LXA3, P18124, P14314, P35579, P51149, P21964, O94826, Q8WUM4, P27824, P62633, Q14573, P23284, Q14697, P04843, P13639, P60709, Q13404, P36578, P12268, O00159, P63096, P54709, P05023, P05067, P27797, P46778, P04899, P49840, O15145, Q7Z5G4, Q13217, Q8TEM1, Q06323, Q9Y4I1, P50914, P61088, Q00610, P06241, P60953, Q8NFH5, O94973, Q9UBI6, P05556, P53992, P26373,…	60	456	960	10946	10.5079	1.50027	0.00088622	0.00138859	0.799378	0.204469	0.0309942	2.92782	0.277287
Reactome_NSP12 P323L	DAVID Reactome	R-HSA-379726~Mitochondrial tRNA aminoacylation	720010618	Q9NP81, Q6PI48, P41250, Q5JTZ9, Q9NSE4, Q9Y2Z4	6	456	21	10946	1.05079	6.8584	0.000160831	0.00142101	0.806767	0.687119	0.0309942	2.92782	0.283756
Reactome_NSP12 P323L	DAVID Reactome	R-HSA-416572~Sema4D induced cell migration and growth-cone collapse	720010725	P35580, P60660, P61586, O14950, P35579, Q7Z406	6	456	21	10946	1.05079	6.8584	0.000160831	0.00142101	0.806767	0.687119	0.0309942	2.92782	0.283756
Reactome_NSP12 P323L	DAVID Reactome	R-HSA-199991~Membrane Trafficking	720010272	P04114, P50395, O15020, Q13813, O15145, Q14746, Q14789, P13987, Q12907, P51148, P35579, Q9Y4I1, P51149, Q9UHD9, Q00610, Q15286, P61006, Q9BVK6, P61923, P02786, Q10471, P61106, P11717, O94973, P53992, Q9Y678, P49257, O75976, Q9NP72, P60709, Q15907, Q01082, P68371, O75396, P54920, O00159, P17302, P68402, Q8NBS9, P31150, P05067, Q9UM54, P62820	43	456	634	10946	7.53065	1.62806	0.00104061	0.00179868	0.875213	0.235565	0.037755	3.56647	0.359102
Reactome_NSP12 P323L	DAVID Reactome	R-HSA-9725370~Signaling by ALK fusions and activated point mutants	720012204	P28482, Q00610, P31939, P49589, P26038, P67936, P06753, P35579, Q9P2E9	9	456	55	10946	1.57618	3.92799	0.000402528	0.00182914	0.879538	0.766418	0.037755	3.56647	0.365177
Reactome_NSP12 P323L	DAVID Reactome	R-HSA-9700206~Signaling by ALK in cancer	720012142	P28482, Q00610, P31939, P49589, P26038, P67936, P06753, P35579, Q9P2E9	9	456	55	10946	1.57618	3.92799	0.000402528	0.00182914	0.879538	0.766418	0.037755	3.56647	0.365177
Reactome_NSP12 P323L	DAVID Reactome	R-HSA-199977~ER to Golgi Anterograde Transport	720010271	O15020, P53992, Q9Y678, Q13813, P49257, Q14746, Q14789, P13987, Q01082, Q12907, P68371, O75396, P54920, P61923, Q9BVK6, P62820	16	456	154	10946	2.8021	2.49396	0.000679787	0.00186162	0.883985	0.409233	0.037755	3.56647	0.371657
Reactome_NSP12 P323L	DAVID Reactome	R-HSA-1592230~Mitochondrial biogenesis	720009926	P30049, Q00059, O75947, O75964, P24539, P18859, P00367, O75431, Q16891, P48735, P06576, Q9NX63	12	456	95	10946	2.10158	3.03213	0.000558289	0.00189677	0.888613	0.438035	0.0378045	3.57116	0.378667
Reactome_NSP12 P323L	DAVID Reactome	R-HSA-8964539~Glutamate and glutamine metabolism	720011741	P54886, P00505, P04181, O94925, P00367	5	456	14	10946	0.875657	8.57299	0.000179787	0.00211472	0.913464	0.943648	0.0414341	3.91402	0.422132
Reactome_NSP12 P323L	DAVID Reactome	R-HSA-8949215~Mitochondrial calcium ion transport	720011700	Q99623, O95202, O75439, Q9UJZ1, Q10713, P21796	6	456	23	10946	1.05079	6.26201	0.000278695	0.00219402	0.921061	0.794455	0.0417561	3.94443	0.437945
Reactome_NSP12 P323L	DAVID Reactome	R-HSA-3371599~Defective HLCS causes multiple carboxylase deficiency	720010558	Q96RQ3, P05165, P05166, Q9HCC0	4	456	7	10946	0.700525	13.7168	9.4122e-05	0.00220339	0.921913	0.772672	0.0417561	3.94443	0.439813
Reactome_NSP12 P323L	DAVID Reactome	R-HSA-5627123~RHO GTPases activate PAKs	720011146	P35580, P60660, O14950, P35579, P60953, Q7Z406	6	456	24	10946	1.05079	6.0011	0.000358654	0.00267812	0.954954	0.931706	0.049934	4.71695	0.534446
Reactome_NSP12 WT	DAVID Reactome	R-HSA-1428517~The citric acid (TCA) cycle and respiratory electron transport	720009865	P30049, P31930, O75947, P08559, O75964, P13804, P10515, P40926, P50213, O43837, Q9P2R7, P18859, P42704, P22695, P20674, Q13423, P51970, P53597, P14927, Q12931, P11177, P38117, P47985, P21796, P06576	25	287	178	10946	6.84932	5.35665	5.6915e-12	3.45899e-11	2.93322e-08	1.46839e-09	1.76529e-08	1.62581e-06	6.90983e-09
Reactome_NSP12 WT	DAVID Reactome	R-HSA-1430728~Metabolism	720009866	P53004, O75947, P08559, P07900, O75027, P10515, P30085, Q01650, Q8IV08, O43837, P30520, Q9P2R7, Q00796, Q02978, Q9UJS0, P22695, P00387, P24752, P20674, Q8TD30, O43324, P04406, O00154, P52209, P11177, P13995, P12268, P38117, P19623, Q7Z4W1, P47985, P07602, Q9Y2Q3, Q8TEM1, Q53GQ0, O00170, P18859, P04181, P04062, O94925, P00568, P23921, P45954, Q8NFH5, P54886, Q92947, Q13423, P49591, P43490, Q9C0I1,…	103	287	2118	10946	28.2192	1.85475	2.17887e-11	4.16341e-11	3.53058e-08	5.62148e-09	1.76529e-08	1.62581e-06	8.31702e-09
Reactome_NSP12 WT	DAVID Reactome	R-HSA-379724~tRNA Aminoacylation	720010617	P54577, P49591, O43324, Q12904, Q5JTZ9, Q6PI48, Q15181, P41250, P47897, P49589, P49588, Q9NSE4, Q9Y2Z4	13	287	42	10946	3.56164	11.805	2.72852e-11	4.41962e-10	3.74784e-07	9.8554e-08	1.24928e-07	1.15058e-05	8.82884e-08
Reactome_NSP12 WT	DAVID Reactome	R-HSA-9609507~Protein localization	720011913	Q7L5D6, Q9Y2Q3, O96008, Q9BTZ2, Q9Y5L4, O43765, P51659, P11441, P12235, Q9NRP2, O00116, P22307, Q9Y3D6, O94826, O60220, Q9UJS0, P46379, P05067, P10809, P21796, Q9HAV7, P06576	22	287	163	10946	6.0274	5.14765	2.46437e-10	1.43156e-09	1.21396e-06	1.27162e-07	3.03491e-07	2.79513e-05	2.85975e-07
Reactome_NSP12 WT	DAVID Reactome	R-HSA-70326~Glucose metabolism	720011454	P06733, P14618, P04406, Q16822, P40926, Q8TEM1, Q8N1F7, P19367, A6NDG6, Q02978, P17858, Q9UJS0, P04075, Q01813, Q8NFH5	15	287	91	10946	4.10959	6.28671	1.20869e-08	8.84189e-08	7.49765e-05	1.87104e-05	1.42358e-05	0.0013111	1.7663e-05
Reactome_NSP12 WT	DAVID Reactome	R-HSA-379716~Cytosolic tRNA aminoacylation	720010616	P54577, P49591, O43324, Q15181, P41250, P47897, Q12904, P49589, P49588	9	287	24	10946	2.46575	14.3023	4.78518e-09	1.00725e-07	8.54111e-05	3.58021e-05	1.42358e-05	0.0013111	2.01212e-05
Reactome_NSP12 WT	DAVID Reactome	R-HSA-5653656~Vesicle-mediated transport	720011168	O15020, P07900, Q13813, Q14789, Q9Y6I3, P51148, Q96CV9, O60749, P51149, P61020, P62330, P20339, Q9H0U4, Q9UHD9, Q9BVA1, Q00610, P49755, P02786, Q99747, Q10471, P61106, Q14671, P11717, P53992, P49257, Q9NP72, Q15907, P14625, Q01082, P68371, O75396, Q9Y4L1, P59998, Q8IWJ2, Q9NZZ3, P36383, P20340, P05067, P62820, P27797	40	287	673	10946	10.9589	2.26683	8.85752e-07	2.10721e-06	0.00178532	0.000228498	0.000255273	0.0235104	0.000420944
Reactome_NSP12 WT	DAVID Reactome	R-HSA-8854518~AURKA Activation by TPX2	720011621	Q96CS2, P07900, Q9P209, Q9H6D7, Q9BT25, Q96MT8, Q68CZ6, Q99871, Q9NVX0, O75330, P68371, O94927	12	287	73	10946	3.28767	6.26949	3.70117e-07	2.69719e-06	0.00228461	0.000668208	0.000285902	0.0263313	0.000538802
Reactome_NSP12 WT	DAVID Reactome	R-HSA-1268020~Mitochondrial protein import	720009814	O96008, O94826, Q9Y5L4, Q9UJS0, O60220, P10809, P12235, P21796, Q9NRP2, Q9HAV7, P06576	11	287	64	10946	3.0137	6.5552	7.18852e-07	5.51589e-06	0.00466657	0.00148261	0.00044016	0.0405383	0.00110188
Reactome_NSP12 WT	DAVID Reactome	R-HSA-163200~Respiratory electron transport, ATP synthesis by chemiosmotic coupling, and heat production by uncoupling proteins.	720009961	P30049, O75947, P31930, P51970, O75964, P13804, P14927, Q12931, P38117, P18859, P42704, P22695, P47985, P20674, P06576	15	287	127	10946	4.10959	4.50465	1.10144e-06	5.5189e-06	0.00466911	0.000284132	0.00044016	0.0405383	0.00110248
Reactome_NSP12 WT	DAVID Reactome	R-HSA-389957~Prefoldin mediated transfer of substrate to CCT/TriC	720010664	Q9BVA1, O15212, Q99471, P61758, O60925, Q9UHV9, P68371, Q9NQP4	8	287	28	10946	2.19178	10.897	3.991e-07	5.70962e-06	0.00483007	0.00164613	0.00044016	0.0405383	0.00114058
Reactome_NSP12 WT	DAVID Reactome	R-HSA-8873719~RAB geranylgeranylation	720011646	P61020, P20339, Q9H0U4, Q9NP72, Q15907, P20340, P51148, P62820, P61019, P61106, P51149	11	287	65	10946	3.0137	6.45436	8.45368e-07	6.37029e-06	0.00538746	0.00130777	0.000450167	0.04146	0.00127255
Reactome_NSP12 WT	DAVID Reactome	R-HSA-1852241~Organelle biogenesis and maintenance	720010160	P30049, Q96CS2, O75947, P07900, O75964, Q9BT25, Q68CZ6, Q9NVX0, Q9NP97, P68371, P36405, Q04837, Q9P209, Q9H6D7, P18859, Q96MT8, Q99871, Q9BVA1, Q92973, Q96LB3, Q16891, O94927, P06576	23	287	296	10946	6.30137	2.96353	3.18563e-06	1.01176e-05	0.00854304	0.000821556	0.000659977	0.0607832	0.00202112
Reactome_NSP12 WT	DAVID Reactome	R-HSA-71406~Pyruvate metabolism and Citric Acid (TCA) cycle	720011471	Q13423, P53597, P08559, P10515, P40926, P11177, P50213, O43837, P21796, Q9P2R7	10	287	55	10946	2.73973	6.93443	1.35293e-06	1.10831e-05	0.00935449	0.00487485	0.000666811	0.0614127	0.002214
Reactome_NSP12 WT	DAVID Reactome	R-HSA-380284~Loss of proteins required for interphase microtubule organization from the centrosome	720010623	Q96CS2, P07900, Q9P209, Q9H6D7, Q9BT25, Q96MT8, Q68CZ6, Q99871, Q9NVX0, P68371, O94927	11	287	70	10946	3.0137	5.99333	1.81915e-06	1.25813e-05	0.0106123	0.00281208	0.000666811	0.0614127	0.00251329
Reactome_NSP12 WT	DAVID Reactome	R-HSA-380259~Loss of Nlp from mitotic centrosomes	720010621	Q96CS2, P07900, Q9P209, Q9H6D7, Q9BT25, Q96MT8, Q68CZ6, Q99871, Q9NVX0, P68371, O94927	11	287	70	10946	3.0137	5.99333	1.81915e-06	1.25813e-05	0.0106123	0.00281208	0.000666811	0.0614127	0.00251329
Reactome_NSP12 WT	DAVID Reactome	R-HSA-70171~Glycolysis	720011450	P06733, A6NDG6, P14618, P17858, P04406, Q8TEM1, P04075, Q8N1F7, P19367, Q01813, Q8NFH5	11	287	71	10946	3.0137	5.90892	2.10314e-06	1.43106e-05	0.0120621	0.00216809	0.000699067	0.0643834	0.00285873
Reactome_NSP12 WT	DAVID Reactome	R-HSA-389958~Cooperation of Prefoldin and TriC/CCT in actin and tubulin folding	720010665	Q9BVA1, O15212, Q99471, P61758, O60925, Q9UHV9, P68371, Q9NQP4	8	287	32	10946	2.19178	9.53484	1.23277e-06	1.48387e-05	0.0125045	0.00507595	0.000699067	0.0643834	0.00296422
Reactome_NSP12 WT	DAVID Reactome	R-HSA-2565942~Regulation of PLK1 Activity at G2/M Transition	720010458	Q96CS2, P07900, Q9P209, Q9H6D7, Q9BT25, Q96MT8, Q68CZ6, Q99871, Q9NVX0, Q96CV9, P68371, O94927	12	287	88	10946	3.28767	5.20082	2.91177e-06	1.71406e-05	0.0144302	0.00449728	0.000765012	0.0704569	0.00342405
Reactome_NSP12 WT	DAVID Reactome	R-HSA-9013418~RHOBTB2 GTPase cycle	720011790	Q9NYL9, Q96DH6, P07900, P12814, Q16543, Q16643, P08238	7	287	23	10946	1.91781	11.6076	1.35391e-06	2.095e-05	0.0176089	0.00765535	0.00084864	0.0781589	0.00418503
Reactome_NSP12 WT	DAVID Reactome	R-HSA-199991~Membrane Trafficking	720010272	O15020, Q13813, Q14789, Q9Y6I3, P51148, Q96CV9, O60749, P51149, P61020, P62330, P20339, Q9H0U4, Q9UHD9, Q9BVA1, Q00610, P49755, P02786, Q99747, Q10471, P61106, Q14671, P11717, P53992, P49257, Q9NP72, Q15907, Q01082, P68371, O75396, P59998, Q8IWJ2, Q9NZZ3, P36383, P20340, P05067, P62820	36	287	634	10946	9.86301	2.16564	9.23482e-06	2.10158e-05	0.0176638	0.00237976	0.00084864	0.0781589	0.00419817
Reactome_NSP12 WT	DAVID Reactome	R-HSA-380320~Recruitment of NuMA to mitotic centrosomes	720010625	Q96CS2, P07900, Q9P209, Q9H6D7, Q9BT25, Q96MT8, Q68CZ6, Q9BVA1, Q99871, Q9NVX0, P68371, O94927	12	287	94	10946	3.28767	4.86886	5.88561e-06	3.2185e-05	0.0269242	0.0120745	0.00124058	0.114257	0.00642931
Reactome_NSP12 WT	DAVID Reactome	R-HSA-380270~Recruitment of mitotic centrosome proteins and complexes	720010622	Q96CS2, P07900, Q9P209, Q9H6D7, Q9BT25, Q96MT8, Q68CZ6, Q99871, Q9NVX0, P68371, O94927	11	287	82	10946	3.0137	5.11626	8.90557e-06	5.14831e-05	0.0427195	0.0136913	0.00181907	0.167535	0.0102842
Reactome_NSP12 WT	DAVID Reactome	R-HSA-380287~Centrosome maturation	720010624	Q96CS2, P07900, Q9P209, Q9H6D7, Q9BT25, Q96MT8, Q68CZ6, Q99871, Q9NVX0, P68371, O94927	11	287	82	10946	3.0137	5.11626	8.90557e-06	5.14831e-05	0.0427195	0.0136913	0.00181907	0.167535	0.0102842
Reactome_NSP12 WT	DAVID Reactome	R-HSA-6798695~Neutrophil degranulation	720011351	P07602, P07900, P14618, Q13813, P04439, Q13217, O00264, P30041, P63172, P51148, P51149, P61020, P61586, P02765, P00387, P61106, P11717, Q9NP72, Q86VP6, P68371, P12268, Q99536, P17858, P17066, P04075, P20340, P07741, P08238, Q14165	29	287	482	10946	7.94521	2.29469	2.54137e-05	6.22464e-05	0.0514176	0.00653537	0.0021114	0.194458	0.0124342
Reactome_NSP12 WT	DAVID Reactome	R-HSA-3371497~HSP90 chaperone cycle for steroid hormone receptors (SHR) in the presence of ligand	720010552	P07900, P54652, P31948, Q9BVA1, P34931, P08238, P68371, Q13451, Q02790	9	287	55	10946	2.46575	6.24099	1.13981e-05	8.2529e-05	0.0675945	0.0403342	0.00269172	0.247904	0.0164857
Reactome_NSP12 WT	DAVID Reactome	R-HSA-3371556~Cellular response to heat stress	720010554	P07900, P54652, P17066, Q8TEM1, O95816, Q8N1F7, P34931, P08238, Q8NFH5, Q02790, Q99615	11	287	89	10946	3.0137	4.71386	1.97413e-05	0.000104204	0.0845776	0.0151637	0.00327278	0.30142	0.0208152
Reactome_NSP12 WT	DAVID Reactome	R-HSA-446203~Asparagine N-linked glycosylation	720010831	O15020, P53992, Q14697, Q13813, P49257, Q14789, Q04323, Q01082, P30101, P68371, O75396, P14314, O75352, Q9H0U4, Q9BVA1, P49755, P27824, P62820, P27797, Q14165, Q99747	21	287	304	10946	5.75342	2.63463	4.98919e-05	0.00013997	0.111929	0.0127899	0.0042391	0.390417	0.0279591
Reactome_NSP12 WT	DAVID Reactome	R-HSA-379726~Mitochondrial tRNA aminoacylation	720010618	Q6PI48, P41250, P47897, Q5JTZ9, Q9NSE4, Q9Y2Z4	6	287	21	10946	1.64384	10.897	1.20062e-05	0.000169641	0.133998	0.0830783	0.00472065	0.434767	0.0338854
Reactome_NSP12 WT	DAVID Reactome	R-HSA-392499~Metabolism of proteins	720010689	P54577, P04439, Q12904, Q04323, P51148, O60925, P14314, P51149, P61020, Q9H0U4, Q6PI48, Q15181, P41250, Q9BVA1, O94826, P61586, P27824, P02765, Q9NSE4, Q13363, P61106, Q14697, P49257, O43324, P49411, Q9NP72, Q15907, Q86VP6, Q5JTZ9, Q01082, P38117, P05067, P61758, P27797, O15020, O43852, Q13813, O94966, Q13217, Q14789, Q8TEM1, Q99471, P30101, P20339, Q15084, P61088, P24534, P04062, P49755, P47897,…	77	287	1970	10946	21.0959	1.49073	0.000112288	0.000172446	0.136055	0.0285562	0.00472065	0.434767	0.0344456
Reactome_NSP12 WT	DAVID Reactome	R-HSA-8854214~TBC/RABGAPs	720011620	P61020, P62330, P20339, Q15907, P20340, P51148, Q96CV9, P51149	8	287	46	10946	2.19178	6.63293	2.22329e-05	0.000172571	0.136147	0.0170613	0.00472065	0.434767	0.0344706
Reactome_NSP12 WT	DAVID Reactome	R-HSA-69275~G2/M Transition	720011431	Q96CS2, P07900, P49454, Q9BT25, Q68CZ6, Q9NVX0, P68371, Q96CV9, O75330, Q9P209, Q9H6D7, Q96MT8, Q99871, Q9BVA1, P08238, O94927	16	287	196	10946	4.38356	3.11342	5.75345e-05	0.000191907	0.150199	0.0147347	0.00508554	0.468373	0.0383325
Reactome_NSP12 WT	DAVID Reactome	R-HSA-453274~Mitotic G2-G2/M phases	720010865	Q96CS2, P07900, P49454, Q9BT25, Q68CZ6, Q9NVX0, P68371, Q96CV9, O75330, Q9P209, Q9H6D7, Q96MT8, Q99871, Q9BVA1, P08238, O94927	16	287	198	10946	4.38356	3.08197	6.46303e-05	0.000214502	0.16633	0.0165369	0.00531019	0.489064	0.0428454
Reactome_NSP12 WT	DAVID Reactome	R-HSA-71403~Citric acid cycle (TCA cycle)	720011470	Q13423, P53597, P40926, P50213, O43837, Q9P2R7	6	287	22	10946	1.64384	10.4016	1.61473e-05	0.00021488	0.166597	0.121155	0.00531019	0.489064	0.0429207
Reactome_NSP12 WT	DAVID Reactome	R-HSA-70263~Gluconeogenesis	720011452	P06733, Q02978, Q16822, P04406, P40926, Q9UJS0, P04075	7	287	34	10946	1.91781	7.85222	2.31938e-05	0.000219171	0.169624	0.096726	0.00531019	0.489064	0.0437777
Reactome_NSP12 WT	DAVID Reactome	R-HSA-5620912~Anchoring of the basal body to the plasma membrane	720011127	Q96CS2, P07900, Q9P209, Q9H6D7, Q9BT25, Q96MT8, Q68CZ6, Q99871, Q9NVX0, P68371, O94927	11	287	98	10946	3.0137	4.28095	4.91541e-05	0.000233494	0.179652	0.0373315	0.00550009	0.506553	0.0466384
Reactome_NSP12 WT	DAVID Reactome	R-HSA-5617833~Cilium Assembly	720011064	Q96CS2, P07900, Q9BT25, Q68CZ6, Q9NVX0, Q9NP97, P68371, P36405, Q9P209, Q9H6D7, Q96MT8, Q99871, Q9BVA1, Q92973, Q96LB3, O94927	16	287	201	10946	4.38356	3.03597	7.7655e-05	0.000252677	0.192892	0.0392793	0.00562683	0.518226	0.0504696
Reactome_NSP12 WT	DAVID Reactome	R-HSA-9706574~RHOBTB GTPase Cycle	720012178	Q9NYL9, Q96DH6, P07900, P12814, Q16543, Q16643, P08238	7	287	35	10946	1.91781	7.62787	2.83483e-05	0.000258781	0.19706	0.0907012	0.00562683	0.518226	0.0516886
Reactome_NSP12 WT	DAVID Reactome	R-HSA-532668~N-glycan trimming in the ER and Calnexin/Calreticulin cycle	720010950	Q14697, Q04323, P27824, P14314, P30101, P27797, Q14165	7	287	35	10946	1.91781	7.62787	2.83483e-05	0.000258781	0.19706	0.0907012	0.00562683	0.518226	0.0516886
Reactome_NSP12 WT	DAVID Reactome	R-HSA-71387~Metabolism of carbohydrates	720011469	P06733, P14618, P04406, Q16822, P40926, P51570, P52209, Q8TEM1, Q8N1F7, P19367, O75330, Q00796, A6NDG6, Q7Z4W1, Q02978, P17858, Q9UJS0, P04075, Q01813, Q8NFH5	20	287	295	10946	5.47945	2.58572	9.77503e-05	0.000269825	0.204546	0.0249054	0.00572029	0.526833	0.0538942
Reactome_NSP12 WT	DAVID Reactome	R-HSA-9012999~RHO GTPase cycle	720011779	Q9NYL9, P07900, Q13813, Q9Y266, P12814, P51149, Q00610, P61586, Q9BX68, P02786, P60953, P80723, Q12774, P49257, P31948, Q01082, P34897, Q86UP2, Q96DH6, Q8TBC3, P20700, P41240, Q16543, Q16643, P67936, P08238	26	287	449	10946	7.12329	2.20852	0.000127495	0.000296316	0.222221	0.0323607	0.00612868	0.564446	0.0591846
Reactome_NSP12 WT	DAVID Reactome	R-HSA-3371568~Attenuation phase	720010555	P07900, P54652, P34931, P08238, Q02790	5	287	14	10946	1.36986	13.6212	1.9729e-05	0.000371383	0.270205	0.27064	0.00749841	0.690596	0.0741755
Reactome_NSP12 WT	DAVID Reactome	R-HSA-9007101~Rab regulation of trafficking	720011769	P61020, P62330, P20339, Q9H0U4, Q9NP72, Q15907, P20340, P51148, Q96CV9, P62820, P61106, P51149	12	287	124	10946	3.28767	3.69091	9.75576e-05	0.000394654	0.28447	0.0727326	0.00778294	0.716801	0.0788223
Reactome_NSP12 WT	DAVID Reactome	R-HSA-68886~M Phase	720011408	P30622, Q96CS2, P07900, Q9Y266, P49454, Q9BT25, Q68CZ6, Q9NVX0, Q8TEM1, Q8N1F7, P68371, Q9H0U4, P20700, Q9P209, Q9H6D7, Q96MT8, Q99871, Q9BVA1, Q92973, P02545, P62820, P61019, Q8NFH5, O94927	24	287	418	10946	6.57534	2.18982	0.000262169	0.000609624	0.403764	0.0654109	0.0117491	1.08208	0.121744
Reactome_NSP12 WT	DAVID Reactome	R-HSA-199977~ER to Golgi Anterograde Transport	720010271	O15020, P53992, Q13813, P49257, Q14789, Q01082, P68371, O75396, Q9H0U4, Q9BVA1, P49755, P62820, Q99747	13	287	154	10946	3.56164	3.21956	0.000202642	0.000708567	0.45178	0.145177	0.0133526	1.22976	0.141496
Reactome_NSP12 WT	DAVID Reactome	R-HSA-194315~Signaling by Rho GTPases	720010232	Q9NYL9, P30622, P07900, Q13813, Q9Y266, P12814, P51149, Q7Z406, P35580, P23528, Q9BVA1, Q00610, P61586, Q9BX68, P02786, P60953, P80723, Q12774, P49257, P49454, P31948, Q01082, P68371, P59998, P34897, Q86UP2, Q96DH6, Q8TBC3, P20700, P41240, Q16543, Q16643, P67936, P08238	34	287	707	10946	9.31507	1.83414	0.000431935	0.000830511	0.505677	0.105476	0.0153103	1.41006	0.165838
Reactome_NSP12 WT	DAVID Reactome	R-HSA-68877~Mitotic Prometaphase	720011404	P30622, Q96CS2, P07900, Q9Y266, P49454, Q9BT25, Q68CZ6, Q9NVX0, P68371, Q9P209, Q9H6D7, Q96MT8, Q99871, Q9BVA1, O94927	15	287	204	10946	4.10959	2.80437	0.000308338	0.000932973	0.546849	0.0764806	0.0168332	1.55032	0.186288
Reactome_NSP12 WT	DAVID Reactome	R-HSA-499943~Interconversion of nucleotide di- and triphosphates	720010908	P54819, P30085, P00568, P23921, Q13232, P23919	6	287	30	10946	1.64384	7.62787	0.000107692	0.000980037	0.564595	0.39356	0.017314	1.5946	0.195681
Reactome_NSP12 WT	DAVID Reactome	R-HSA-163210~Formation of ATP by chemiosmotic coupling	720009962	P30049, O75947, O75964, P18859, P06576	5	287	18	10946	1.36986	10.5943	7.74508e-05	0.00104536	0.588081	0.461773	0.0180911	1.66617	0.208717
Reactome_NSP12 WT	DAVID Reactome	R-HSA-15869~Metabolism of nucleotides	720009925	P54819, P31939, P30085, P00568, P23921, Q13232, P23919, P07741, P12268, P30520	10	287	99	10946	2.73973	3.85246	0.000261061	0.00110826	0.609499	0.236201	0.0187961	1.7311	0.221268
Reactome_NSP12 WT	DAVID Reactome	R-HSA-8949613~Cristae formation	720011702	P30049, O75947, O75964, P18859, Q16891, P06576	6	287	31	10946	1.64384	7.38181	0.000130628	0.00114386	0.621125	0.597481	0.0190195	1.75168	0.228372
Reactome_NSP12 WT	DAVID Reactome	R-HSA-9716542~Signaling by Rho GTPases, Miro GTPases and RHOBTB3	720012192	Q9NYL9, P30622, P07900, Q13813, Q9Y266, P12814, P51149, Q7Z406, P35580, P23528, Q9BVA1, Q00610, P61586, Q9BX68, P02786, P60953, P80723, Q12774, P49257, P49454, P31948, Q01082, P68371, P59998, P34897, Q86UP2, Q96DH6, Q8TBC3, P20700, P41240, Q16543, Q16643, P67936, P08238	34	287	723	10946	9.31507	1.79355	0.000632903	0.00117827	0.632032	0.150698	0.0192148	1.76966	0.235237
Reactome_NSP12 WT	DAVID Reactome	R-HSA-6807878~COPI-mediated anterograde transport	720011388	O15020, Q9H0U4, Q13813, Q9BVA1, Q14789, P49755, Q01082, P68371, P62820, Q99747	10	287	101	10946	2.73973	3.77618	0.000307481	0.00127782	0.661857	0.146735	0.0204451	1.88298	0.2551
Reactome_NSP12 WT	DAVID Reactome	R-HSA-611105~Respiratory electron transport	720011314	P31930, P51970, P13804, P42704, P14927, Q12931, P22695, P47985, P38117, P20674	10	287	103	10946	2.73973	3.70285	0.000360604	0.00146772	0.712215	0.310791	0.0230487	2.12276	0.292984
Reactome_NSP12 WT	DAVID Reactome	R-HSA-69278~Cell Cycle, Mitotic	720011432	P30622, P07900, Q9Y266, Q8TEM1, Q96CV9, Q9H0U4, Q9H6D7, Q9BVA1, Q92973, P02545, Q8NFH5, O94927, Q96CS2, P49454, Q9BT25, Q68CZ6, Q9NVX0, Q8N1F7, P68371, O75330, P12004, P20700, Q9P209, Q96MT8, Q99871, P08238, P62820, P61019	28	287	561	10946	7.67123	1.90357	0.000795041	0.00159865	0.742502	0.185517	0.0246483	2.27009	0.319099
Reactome_NSP12 WT	DAVID Reactome	R-HSA-3371453~Regulation of HSF1-mediated heat shock response	720010551	P54652, P17066, Q8TEM1, O95816, Q8N1F7, P34931, Q8NFH5, Q99615	8	287	69	10946	2.19178	4.42196	0.000423038	0.00208753	0.830021	0.420642	0.0316112	2.91137	0.416581
Reactome_NSP12 WT	DAVID Reactome	R-HSA-1640170~Cell Cycle	720009978	P30622, P54652, P07900, Q9Y266, Q8TEM1, Q96CV9, Q9H0U4, Q9H6D7, P61088, Q9BVA1, Q92973, Q9Y230, P02545, Q8NFH5, O94927, Q96CS2, P49454, Q9BT25, Q8WXH0, Q68CZ6, Q9NVX0, Q8N1F7, P68371, O75330, P12004, P20700, Q9P209, Q96MT8, Q99871, P08238, P62820, P61019	32	287	692	10946	8.76712	1.76367	0.00122098	0.00226136	0.853365	0.270361	0.0336427	3.09847	0.451231
Reactome_NSP12 WT	DAVID Reactome	R-HSA-9609523~Insertion of tail-anchored proteins into the endoplasmic reticulum membrane	720011914	Q7L5D6, P46379, O43765, P11441, P05067	5	287	22	10946	1.36986	8.66804	0.000218403	0.00230165	0.858301	0.825701	0.0336517	3.09929	0.45926
Reactome_NSP12 WT	DAVID Reactome	R-HSA-8876198~RAB GEFs exchange GTP for GDP on RABs	720011655	P61020, P20339, Q9H0U4, Q9NP72, P20340, P51148, P62820, P61106, P51149	9	287	90	10946	2.46575	3.81394	0.000568637	0.00239195	0.86877	0.64201	0.0343792	3.16629	0.477257
Reactome_NSP12 WT	DAVID Reactome	R-HSA-390466~Chaperonin-mediated protein folding	720010670	Q9BVA1, P04062, O15212, Q99471, P61758, O60925, Q9UHV9, P68371, Q9NQP4	9	287	91	10946	2.46575	3.77203	0.00061684	0.00256452	0.886676	0.615251	0.0362452	3.33815	0.511644
Reactome_NSP12 WT	DAVID Reactome	R-HSA-199992~trans-Golgi Network Vesicle Budding	720010273	P11717, Q14789, Q00610, P51148, P02786, P05067, O60749, Q14671	8	287	72	10946	2.19178	4.23771	0.0005659	0.00266753	0.896179	0.518196	0.037083	3.41531	0.532168
Reactome_NSP12 WT	DAVID Reactome	R-HSA-3371571~HSF1-dependent transactivation	720010556	P07900, P54652, P34931, P08238, Q02790	5	287	24	10946	1.36986	7.9457	0.000337679	0.0032091	0.934499	0.920097	0.0438922	4.04243	0.640037
Reactome_NSP12 WT	DAVID Reactome	R-HSA-432722~Golgi Associated Vesicle Biogenesis	720010796	P11717, Q14789, Q00610, P51148, P02786, O60749, Q14671	7	287	56	10946	1.91781	4.76742	0.000611093	0.00327467	0.938053	0.758139	0.0440782	4.05956	0.653095
Reactome_NSP12 WT	DAVID Reactome	R-HSA-948021~Transport to the Golgi and subsequent modification	720011903	O15020, P53992, Q13813, P49257, Q14789, Q01082, P68371, O75396, Q9H0U4, Q9BVA1, P49755, P62820, Q99747	13	287	185	10946	3.56164	2.68006	0.00117827	0.00337935	0.943332	0.598488	0.0447764	4.12386	0.673936
Reactome_NSP12 WT	DAVID Reactome	R-HSA-391251~Protein folding	720010681	Q9BVA1, P04062, O15212, Q99471, P61758, O60925, Q9UHV9, P68371, Q9NQP4	9	287	97	10946	2.46575	3.5387	0.000981233	0.00381411	0.960858	0.830173	0.0497595	4.5828	0.760474
Reactome_NSP13 E341D	DAVID Reactome	R-HSA-72312~rRNA processing	720011482	Q9Y3U8, Q9UNQ2, P46087, P26373, P18077, P42766, P62266, P50914, P40429, P62910, P83731, Q9NXF1, P46776, P62753, Q99848, P46778, Q99714	17	66	205	10946	20.4819	13.7533	2.46785e-15	3.68368e-14	1.59601e-11	1.89049e-12	1.59504e-11	1.45506e-09	7.34968e-12
Reactome_NSP13 E341D	DAVID Reactome	R-HSA-8868773~rRNA processing in the nucleus and cytosol	720011644	Q9Y3U8, Q9UNQ2, P46087, P26373, P18077, P42766, P62266, P50914, P40429, P62910, P83731, Q9NXF1, P46776, P62753, Q99848, P46778	16	66	195	10946	19.2771	13.6081	2.17829e-14	3.19713e-13	1.38449e-10	5.61418e-12	6.9218e-11	6.31434e-09	6.38045e-11
Reactome_NSP13 E341D	DAVID Reactome	R-HSA-1799339~SRP-dependent cotranslational protein targeting to membrane	720010133	Q9Y3U8, P26373, P18077, P42766, O76094, P62266, P50914, P40429, P62910, P83731, P46776, P62753, P46778	13	66	113	10946	15.6627	19.0799	9.66495e-14	2.0585e-12	8.91315e-10	1.9959e-10	2.97111e-10	2.71036e-08	4.10749e-10
Reactome_NSP13 E341D	DAVID Reactome	R-HSA-156902~Peptide chain elongation	720009921	Q9Y3U8, P42766, P62266, P50914, P26373, P62910, P40429, P18077, P83731, P62753, P46776, P46778	12	66	90	10946	14.4578	22.1131	1.53622e-13	3.85966e-12	1.67125e-09	2.77501e-10	3.02588e-10	2.76033e-08	7.70162e-10
Reactome_NSP13 E341D	DAVID Reactome	R-HSA-192823~Viral mRNA Translation	720010210	Q9Y3U8, P42766, P62266, P50914, P26373, P62910, P40429, P18077, P83731, P62753, P46776, P46778	12	66	90	10946	14.4578	22.1131	1.53622e-13	3.85966e-12	1.67125e-09	2.77501e-10	3.02588e-10	2.76033e-08	7.70162e-10
Reactome_NSP13 E341D	DAVID Reactome	R-HSA-168255~Influenza Infection	720010045	Q9Y3U8, P26373, P12236, P18077, P42766, P62266, P50914, P40429, P62910, P83731, P46776, P62753, P27797, P46778	14	66	157	10946	16.8675	14.789	3.53592e-13	5.68982e-12	2.46368e-09	1.82461e-10	3.02588e-10	2.76033e-08	1.13534e-09
Reactome_NSP13 E341D	DAVID Reactome	R-HSA-72764~Eukaryotic Translation Termination	720011492	Q9Y3U8, P42766, P62266, P50914, P26373, P62910, P40429, P18077, P83731, P62753, P46776, P46778	12	66	94	10946	14.4578	21.1721	2.62987e-13	6.28937e-12	2.72332e-09	5.42856e-10	3.02588e-10	2.76033e-08	1.25499e-09
Reactome_NSP13 E341D	DAVID Reactome	R-HSA-2408557~Selenocysteine synthesis	720010427	Q9Y3U8, P42766, P62266, P50914, P26373, P62910, P40429, P18077, P83731, P62753, P46776, P46778	12	66	94	10946	14.4578	21.1721	2.62987e-13	6.28937e-12	2.72332e-09	5.42856e-10	3.02588e-10	2.76033e-08	1.25499e-09
Reactome_NSP13 E341D	DAVID Reactome	R-HSA-156842~Eukaryotic Translation Elongation	720009920	Q9Y3U8, P42766, P62266, P50914, P26373, P62910, P40429, P18077, P83731, P62753, P46776, P46778	12	66	94	10946	14.4578	21.1721	2.62987e-13	6.28937e-12	2.72332e-09	5.42856e-10	3.02588e-10	2.76033e-08	1.25499e-09
Reactome_NSP13 E341D	DAVID Reactome	R-HSA-975956~Nonsense Mediated Decay (NMD) independent of the Exon Junction Complex (EJC)	720012258	Q9Y3U8, P42766, P62266, P50914, P26373, P62910, P40429, P18077, P83731, P62753, P46776, P46778	12	66	96	10946	14.4578	20.7311	3.40946e-13	7.96066e-12	3.44695e-09	4.39825e-10	3.44696e-10	3.14446e-08	1.58846e-09
Reactome_NSP13 E341D	DAVID Reactome	R-HSA-9633012~Response of EIF2AK4 (GCN2) to amino acid deficiency	720011951	Q9Y3U8, P42766, P62266, P50914, P26373, P62910, P40429, P18077, P83731, P62753, P46776, P46778	12	66	102	10946	14.4578	19.5116	7.17311e-13	1.56477e-11	6.77546e-09	7.40269e-10	5.64621e-10	5.1507e-08	3.12232e-09
Reactome_NSP13 E341D	DAVID Reactome	R-HSA-72689~Formation of a pool of free 40S subunits	720011486	Q9Y3U8, P42766, P62266, P50914, P26373, P62910, P40429, P18077, P83731, P62753, P46776, P46778	12	66	102	10946	14.4578	19.5116	7.17311e-13	1.56477e-11	6.77546e-09	7.40269e-10	5.64621e-10	5.1507e-08	3.12232e-09
Reactome_NSP13 E341D	DAVID Reactome	R-HSA-156827~L13a-mediated translational silencing of Ceruloplasmin expression	720009919	Q9Y3U8, P42766, P62266, P50914, P26373, P62910, P40429, P18077, P83731, P62753, P46776, P46778	12	66	112	10946	14.4578	17.7695	2.23985e-12	4.40387e-11	1.90688e-08	2.31155e-09	1.40194e-09	1.2789e-07	8.78746e-09
Reactome_NSP13 E341D	DAVID Reactome	R-HSA-6791226~Major pathway of rRNA processing in the nucleolus and cytosol	720011341	Q9Y3U8, P26373, P18077, P42766, P62266, P50914, P40429, P62910, P83731, Q9NXF1, P46776, P62753, Q99848, P46778	14	66	185	10946	16.8675	12.5507	3.4038e-12	4.58812e-11	1.98666e-08	2.63457e-09	1.40194e-09	1.2789e-07	9.1551e-09
Reactome_NSP13 E341D	DAVID Reactome	R-HSA-72706~GTP hydrolysis and joining of the 60S ribosomal subunit	720011489	Q9Y3U8, P42766, P62266, P50914, P26373, P62910, P40429, P18077, P83731, P62753, P46776, P46778	12	66	113	10946	14.4578	17.6122	2.49452e-12	4.8566e-11	2.1029e-08	5.14877e-09	1.40194e-09	1.2789e-07	9.6908e-09
Reactome_NSP13 E341D	DAVID Reactome	R-HSA-975957~Nonsense Mediated Decay (NMD) enhanced by the Exon Junction Complex (EJC)	720012259	Q9Y3U8, P42766, P62266, P50914, P26373, P62910, P40429, P18077, P83731, P62753, P46776, P46778	12	66	116	10946	14.4578	17.1567	3.42439e-12	6.47724e-11	2.80465e-08	4.41744e-09	1.64979e-09	1.50501e-07	1.29246e-08
Reactome_NSP13 E341D	DAVID Reactome	R-HSA-927802~Nonsense-Mediated Decay (NMD)	720011890	Q9Y3U8, P42766, P62266, P50914, P26373, P62910, P40429, P18077, P83731, P62753, P46776, P46778	12	66	116	10946	14.4578	17.1567	3.42439e-12	6.47724e-11	2.80465e-08	4.41744e-09	1.64979e-09	1.50501e-07	1.29246e-08
Reactome_NSP13 E341D	DAVID Reactome	R-HSA-2408522~Selenoamino acid metabolism	720010424	Q9Y3U8, P42766, P62266, P50914, P26373, P62910, P40429, P18077, P83731, P62753, P46776, P46778	12	66	119	10946	14.4578	16.7242	4.65945e-12	8.56936e-11	3.71053e-08	3.60645e-09	2.0332e-09	1.85476e-07	1.70992e-08
Reactome_NSP13 E341D	DAVID Reactome	R-HSA-72737~Cap-dependent Translation Initiation	720011491	Q9Y3U8, P42766, P62266, P50914, P26373, P62910, P40429, P18077, P83731, P62753, P46776, P46778	12	66	120	10946	14.4578	16.5848	5.15345e-12	9.3912e-11	4.06639e-08	3.98876e-09	2.0332e-09	1.85476e-07	1.87391e-08
Reactome_NSP13 E341D	DAVID Reactome	R-HSA-72613~Eukaryotic Translation Initiation	720011483	Q9Y3U8, P42766, P62266, P50914, P26373, P62910, P40429, P18077, P83731, P62753, P46776, P46778	12	66	120	10946	14.4578	16.5848	5.15345e-12	9.3912e-11	4.06639e-08	3.98876e-09	2.0332e-09	1.85476e-07	1.87391e-08
Reactome_NSP13 E341D	DAVID Reactome	R-HSA-168273~Influenza Viral RNA Transcription and Replication	720010050	Q9Y3U8, P42766, P62266, P50914, P26373, P62910, P40429, P18077, P83731, P62753, P46776, P46778	12	66	136	10946	14.4578	14.6337	2.30327e-11	3.66209e-10	1.58568e-07	1.78273e-08	7.55087e-09	6.88821e-07	7.3073e-08
Reactome_NSP13 E341D	DAVID Reactome	R-HSA-72766~Translation	720011493	Q9Y3U8, P82914, P26373, P18077, P42766, O76094, P62266, P50914, Q6PI48, P40429, P62910, P83731, P46776, P62753, P46778	15	66	292	10946	18.0723	8.51961	1.3603e-10	1.2177e-09	5.27262e-07	3.50958e-08	2.39665e-08	2.18632e-06	2.42978e-07
Reactome_NSP13 E341D	DAVID Reactome	R-HSA-9711097~Cellular response to starvation	720012189	Q9Y3U8, P42766, P62266, P50914, P26373, P62910, P40429, P18077, P83731, P62753, P46776, P46778	12	66	157	10946	14.4578	12.6763	1.25444e-10	1.7089e-09	7.39954e-07	6.47293e-08	3.21719e-08	2.93485e-06	3.40993e-07
Reactome_NSP13 E341D	DAVID Reactome	R-HSA-9010553~Regulation of expression of SLITs and ROBOs	720011775	Q9Y3U8, P42766, P62266, P50914, P26373, P62910, P40429, P18077, P83731, P62753, P46776, P46778	12	66	172	10946	14.4578	11.5708	3.63648e-10	4.49479e-09	1.94624e-06	9.38213e-08	8.10934e-08	7.39767e-06	8.96886e-07
Reactome_NSP13 E341D	DAVID Reactome	R-HSA-376176~Signaling by ROBO receptors	720010607	Q9Y3U8, P26373, P18077, P42766, P62266, P50914, P40429, P62910, P83731, P61586, P46776, P62753, P46778	13	66	219	10946	15.6627	9.84489	4.62731e-10	4.8216e-09	2.08775e-06	1.19385e-07	8.351e-08	7.61812e-06	9.62097e-07
Reactome_NSP13 E341D	DAVID Reactome	R-HSA-71291~Metabolism of amino acids and derivatives	720011466	Q9Y3U8, P26373, P18077, Q9HCC0, P42766, P62266, Q96RQ3, P50914, P40429, P62910, P83731, P46776, P62753, P46778, Q99714	15	66	376	10946	18.0723	6.6163	4.5004e-09	3.10014e-08	1.34235e-05	1.1611e-06	5.16292e-07	4.70983e-05	6.18599e-06
Reactome_NSP13 E341D	DAVID Reactome	R-HSA-5663205~Infectious disease	720011233	Q16637, Q9Y3U8, P04439, P26373, P12236, P18077, P51149, Q02790, P42766, P62266, P50914, P40429, P62910, P83731, P04350, P62879, P46776, P62753, P08238, P27797, P46778	22	66	960	10946	26.506	3.80069	1.89134e-08	7.37808e-08	3.19466e-05	4.87965e-06	1.18323e-06	0.000107939	1.47222e-05
Reactome_NSP13 E341D	DAVID Reactome	R-HSA-8953854~Metabolism of RNA	720011712	Q16637, Q9Y3U8, Q9UNQ2, P46087, P26373, P18077, P42766, P62266, P50914, P40429, P62910, P83731, Q9NXF1, P46776, P62753, Q99848, P46778, Q99714	19	66	716	10946	22.8916	4.40101	2.31494e-08	1.04934e-07	4.54355e-05	5.97253e-06	1.62273e-06	0.000148032	2.09385e-05
Reactome_NSP13 E341D	DAVID Reactome	R-HSA-1643685~Disease	720009979	Q9Y3U8, P04439, P12236, P35613, P51149, P42766, Q96RQ3, P50914, Q9NR09, P62910, P40429, P83731, P62879, P62753, Q16637, P26373, P18077, Q9HCC0, Q02790, P84095, P62266, P04350, P05165, P05166, P46776, P08238, P27797, P46778	29	66	1748	10946	34.9398	2.75149	6.52491e-08	1.83207e-07	7.93257e-05	1.68341e-05	2.73548e-06	0.000249541	3.65571e-05
Reactome_NSP13 E341D	DAVID Reactome	R-HSA-196780~Biotin transport and metabolism	720010246	Q96RQ3, P05165, O00763, P05166, Q9HCC0	5	66	11	10946	6.0241	75.3857	3.06901e-09	3.62219e-07	0.000156829	4.67153e-05	5.22803e-06	0.000476922	7.22769e-05
Reactome_NSP13 E341D	DAVID Reactome	R-HSA-2262752~Cellular responses to stress	720010418	Q9Y3U8, P26373, P18077, Q9Y4L1, Q02790, P42766, P62266, P50914, P40429, P62910, O95816, P83731, P04350, P46776, P62753, P08238, P27797, P46778	18	66	789	10946	21.6867	3.78362	5.75843e-07	2.24246e-06	0.000970513	0.000148556	3.06498e-05	0.002796	0.000447457
Reactome_NSP13 E341D	DAVID Reactome	R-HSA-392499~Metabolism of proteins	720010689	Q9Y3U8, Q9Y265, P04439, P18085, P51148, P51149, P42766, P50914, Q6PI48, P62910, P40429, P83731, P62879, P61586, P62753, P82914, Q8WUD1, Q9NP72, P26373, P18077, O76094, P62266, P04350, P46776, P62820, P61019, P27797, P21796, P46778	29	66	1970	10946	34.9398	2.44142	9.09023e-07	2.26511e-06	0.000980313	0.000234501	3.06498e-05	0.002796	0.000451978
Reactome_NSP13 E341D	DAVID Reactome	R-HSA-8953897~Cellular responses to stimuli	720011713	Q9Y3U8, P26373, P18077, Q9Y4L1, Q02790, P42766, P62266, P50914, P40429, P62910, O95816, P83731, P04350, P46776, P62753, P08238, P27797, P46778	18	66	803	10946	21.6867	3.71765	7.45456e-07	2.8521e-06	0.0012342	0.000192309	3.67747e-05	0.00335474	0.000569105
Reactome_NSP13 E341D	DAVID Reactome	R-HSA-1430728~Metabolism	720009866	Q9Y3U8, P48651, O00763, O95299, P35613, P42126, P42766, O00170, Q96RQ3, P50914, P62910, P40429, P22695, P83731, P62879, P62753, Q9UI09, P04406, P26373, Q12931, P18077, Q9HCC0, P62266, P05165, P05166, P46776, P08238, P21796, P46778, Q99714	30	66	2118	10946	36.1446	2.34913	1.20496e-06	2.88762e-06	0.00124956	0.000310832	3.67747e-05	0.00335474	0.000576193
Reactome_NSP13 E341D	DAVID Reactome	R-HSA-422475~Axon guidance	720010756	Q9Y3U8, P26373, P18077, P42766, P62266, P50914, P40429, P62910, P83731, P04350, P61586, P46776, P62753, P08238, P46778	15	66	553	10946	18.0723	4.4986	7.22271e-07	3.35749e-06	0.00145274	0.000186329	4.15369e-05	0.00378917	0.00066995
Reactome_NSP13 E341D	DAVID Reactome	R-HSA-9675108~Nervous system development	720012086	Q9Y3U8, P26373, P18077, P42766, P62266, P50914, P40429, P62910, P83731, P04350, P61586, P46776, P62753, P08238, P46778	15	66	578	10946	18.0723	4.30403	1.26182e-06	5.60966e-06	0.00242604	0.000325497	6.74717e-05	0.00615504	0.00111934
Reactome_NSP13 E341D	DAVID Reactome	R-HSA-3371599~Defective HLCS causes multiple carboxylase deficiency	720010558	Q96RQ3, P05165, P05166, Q9HCC0	4	66	7	10946	4.81928	94.7706	4.1624e-08	6.87796e-06	0.00297374	0.000654863	8.04907e-05	0.00734268	0.00137242
Reactome_NSP13 E341D	DAVID Reactome	R-HSA-3323169~Defects in biotin (Btn) metabolism	720010537	Q96RQ3, P05165, P05166, Q9HCC0	4	66	8	10946	4.81928	82.9242	8.28707e-08	1.0958e-05	0.0047336	0.00147418	0.000124864	0.0113906	0.00218654
Reactome_NSP13 E341D	DAVID Reactome	R-HSA-8873719~RAB geranylgeranylation	720011646	Q8WUD1, Q9NP72, P51148, P62820, P61019, P51149	6	66	65	10946	7.22892	15.3091	2.3827e-06	3.96361e-05	0.0170164	0.00368164	0.000440063	0.0401443	0.00790881
Reactome_NSP13 E341D	DAVID Reactome	R-HSA-3296482~Defects in vitamin and cofactor metabolism	720010527	Q96RQ3, P05165, P05166, Q9HCC0	4	66	22	10946	4.81928	30.1543	8.12694e-06	0.000283947	0.115707	0.0629321	0.00307372	0.280397	0.0566505
Reactome_NSP13 E341D	DAVID Reactome	R-HSA-9754678~SARS-CoV-2 modulates host translation machinery	720012238	Q16637, P62266, P62753	4	66	51	10946	4.81928	13.0077	0.000243486	0.00339669	0.770825	0.466486	0.0358723	3.27242	0.676626
Reactome_NSP13 E341D	DAVID Reactome	R-HSA-1428517~The citric acid (TCA) cycle and respiratory electron transport	720009865	Q9UI09, Q12931, P22695, O95299, P35613, P21796	6	66	178	10946	7.22892	5.5904	0.000688257	0.00403926	0.826667	0.162749	0.0416429	3.79883	0.804371
Reactome_NSP13 P77L	DAVID Reactome	R-HSA-380320~Recruitment of NuMA to mitotic centrosomes	720010625	Q96CS2, Q14204, Q9BT25, Q68CZ6, O94986, O95613, Q9NVX0, Q13509, Q9UPN4, O43303, Q9BUF5, Q9P209, P61981, Q9H6D7, Q99871, Q66GS9, Q9BSJ2, O94927	18	153	94	10946	9.04523	13.6996	5.18743e-16	8.99918e-15	6.09712e-12	1.14575e-12	6.10145e-12	5.32752e-10	1.79856e-12
Reactome_NSP13 P77L	DAVID Reactome	R-HSA-380270~Recruitment of mitotic centrosome proteins and complexes	720010622	Q96CS2, Q14204, Q9BT25, Q68CZ6, O94986, O95613, Q9NVX0, Q9UPN4, O43303, Q9P209, P61981, Q9H6D7, Q99871, Q66GS9, Q9BSJ2, O94927	16	153	82	10946	8.0402	13.9595	1.81423e-14	3.0701e-13	2.0813e-10	2.80136e-11	6.93842e-11	6.05833e-09	6.13065e-11
Reactome_NSP13 P77L	DAVID Reactome	R-HSA-380287~Centrosome maturation	720010624	Q96CS2, Q14204, Q9BT25, Q68CZ6, O94986, O95613, Q9NVX0, Q9UPN4, O43303, Q9P209, P61981, Q9H6D7, Q99871, Q66GS9, Q9BSJ2, O94927	16	153	82	10946	8.0402	13.9595	1.81423e-14	3.0701e-13	2.0813e-10	2.80136e-11	6.93842e-11	6.05833e-09	6.13065e-11
Reactome_NSP13 P77L	DAVID Reactome	R-HSA-380259~Loss of Nlp from mitotic centrosomes	720010621	Q96CS2, Q14204, Q9BT25, Q68CZ6, O94986, O95613, Q9NVX0, Q9UPN4, O43303, Q9P209, P61981, Q9H6D7, Q99871, Q66GS9, O94927	15	153	70	10946	7.53769	15.3305	2.82464e-14	5.36342e-13	3.63644e-10	4.36531e-11	7.27279e-11	6.35028e-09	1.07114e-10
Reactome_NSP13 P77L	DAVID Reactome	R-HSA-380284~Loss of proteins required for interphase microtubule organization from the centrosome	720010623	Q96CS2, Q14204, Q9BT25, Q68CZ6, O94986, O95613, Q9NVX0, Q9UPN4, O43303, Q9P209, P61981, Q9H6D7, Q99871, Q66GS9, O94927	15	153	70	10946	7.53769	15.3305	2.82464e-14	5.36342e-13	3.63644e-10	4.36531e-11	7.27279e-11	6.35028e-09	1.07114e-10
Reactome_NSP13 P77L	DAVID Reactome	R-HSA-8854518~AURKA Activation by TPX2	720011621	Q96CS2, Q14204, Q9BT25, Q68CZ6, O94986, O95613, Q9NVX0, Q9UPN4, O43303, Q9P209, P61981, Q9H6D7, Q99871, Q66GS9, O94927	15	153	73	10946	7.53769	14.7005	5.49801e-14	9.90182e-13	6.71361e-10	9.92506e-11	1.11891e-10	9.7698e-09	1.97753e-10
Reactome_NSP13 P77L	DAVID Reactome	R-HSA-68877~Mitotic Prometaphase	720011404	Q96CS2, Q14204, Q13257, Q9BT25, Q68CZ6, O94986, O95613, Q9NVX0, Q13509, Q9UPN4, O43303, P42677, Q9BUF5, Q9P209, P61981, Q9H6D7, Q9NTJ3, Q99871, Q66GS9, Q9BSJ2, O94927	21	153	204	10946	10.5528	7.36467	6.94536e-13	5.62653e-12	3.81477e-09	1.79195e-10	5.44969e-10	4.75843e-08	1.12365e-09
Reactome_NSP13 P77L	DAVID Reactome	R-HSA-2565942~Regulation of PLK1 Activity at G2/M Transition	720010458	Q96CS2, Q14204, Q9BT25, Q68CZ6, O94986, O95613, Q9NVX0, Q9UPN4, O43303, Q9P209, P61981, Q9H6D7, Q99871, Q66GS9, O94927	15	153	88	10946	7.53769	12.1947	1.00295e-12	1.44148e-11	9.77324e-09	1.55261e-09	1.22165e-09	1.06669e-07	2.87872e-09
Reactome_NSP13 P77L	DAVID Reactome	R-HSA-5620912~Anchoring of the basal body to the plasma membrane	720011127	Q96CS2, Q14204, Q9BT25, Q68CZ6, O94986, O95613, Q9NVX0, Q9UPN4, O43303, Q9P209, P61981, Q9H6D7, Q99871, Q66GS9, O94927	15	153	98	10946	7.53769	10.9504	5.12516e-12	6.49305e-11	4.40229e-08	3.96684e-09	4.89143e-09	4.27099e-07	1.2967e-08
Reactome_NSP13 P77L	DAVID Reactome	R-HSA-68886~M Phase	720011408	Q14204, O95235, Q13257, O94986, O95613, Q9UPN4, Q9H6D7, P61981, Q66GS9, P02545, O94927, Q96HA1, Q96CS2, Q9BT25, Q68CZ6, Q13509, Q9NVX0, Q8N1F7, O43303, P42677, Q9BUF5, Q9P209, Q9NTJ3, Q99871, Q92621, Q5SRE5, Q9BSJ2	27	153	418	10946	13.5678	4.62117	2.06985e-11	1.01376e-10	6.87328e-08	5.34023e-09	6.87328e-09	6.00145e-07	2.02453e-08
Reactome_NSP13 P77L	DAVID Reactome	R-HSA-69275~G2/M Transition	720011431	Q96CS2, Q14204, Q9BT25, Q68CZ6, O94986, O95613, Q9NVX0, Q13509, Q9UPN4, O43303, Q9BUF5, Q9P209, P61981, Q9H6D7, Q99871, Q66GS9, Q9BSJ2, O94927	18	153	196	10946	9.04523	6.57023	2.30408e-10	1.64795e-09	1.11731e-06	5.94453e-08	1.01574e-07	8.86897e-06	3.29105e-07
Reactome_NSP13 P77L	DAVID Reactome	R-HSA-453274~Mitotic G2-G2/M phases	720010865	Q96CS2, Q14204, Q9BT25, Q68CZ6, O94986, O95613, Q9NVX0, Q13509, Q9UPN4, O43303, Q9BUF5, Q9P209, P61981, Q9H6D7, Q99871, Q66GS9, Q9BSJ2, O94927	18	153	198	10946	9.04523	6.50386	2.72387e-10	1.92685e-09	1.3064e-06	7.02758e-08	1.08867e-07	9.50579e-06	3.84802e-07
Reactome_NSP13 P77L	DAVID Reactome	R-HSA-5617833~Cilium Assembly	720011064	Q96CS2, Q14204, Q15643, Q9BT25, Q68CZ6, O94986, O95613, Q9NVX0, Q13509, Q9UPN4, O43303, Q9BUF5, Q9P209, P61981, Q9H6D7, Q99871, Q66GS9, O94927	18	153	201	10946	9.04523	6.40679	3.48807e-10	2.42756e-09	1.64589e-06	1.79985e-07	1.26607e-07	1.10547e-05	4.84797e-07
Reactome_NSP13 P77L	DAVID Reactome	R-HSA-69278~Cell Cycle, Mitotic	720011432	Q14204, O95235, Q13257, O94986, O95613, P31350, Q9UPN4, Q9H6D7, P61981, Q66GS9, P02545, O94927, Q96HA1, Q96CS2, Q9BT25, Q68CZ6, Q13509, Q9NVX0, Q8N1F7, O75496, O43303, P42677, Q9BUF5, Q9P209, Q9NTJ3, Q99871, Q92621, Q5SRE5, Q9BSJ2	29	153	561	10946	14.5729	3.69827	7.13252e-10	2.7643e-09	1.8742e-06	1.84019e-07	1.33871e-07	1.16891e-05	5.52046e-07
Reactome_NSP13 P77L	DAVID Reactome	R-HSA-1640170~Cell Cycle	720009978	Q14204, O95235, Q13257, O94986, O95613, P31350, Q9UPN4, Q9H6D7, P61981, P61088, Q66GS9, P02545, O94927, Q96HA1, Q96CS2, Q9BT25, Q68CZ6, Q13509, Q9NVX0, Q8N1F7, O75496, O43303, P42677, Q9BUF5, Q9P209, Q9NTJ3, Q99871, Q92621, Q5SRE5, Q9BSJ2	30	153	692	10946	15.0754	3.10155	2.12349e-08	6.85869e-08	4.65009e-05	5.47859e-06	3.10013e-06	0.00027069	1.36972e-05
Reactome_NSP13 P77L	DAVID Reactome	R-HSA-1852241~Organelle biogenesis and maintenance	720010160	Q96CS2, Q14204, Q15643, Q9BT25, Q68CZ6, O94986, O95613, Q9NVX0, Q13509, Q9UPN4, O43303, Q9BUF5, Q9P209, P61981, Q9H6D7, Q99871, Q66GS9, P00367, O94927	19	153	296	10946	9.54774	4.59225	2.86186e-08	1.39614e-07	9.46537e-05	7.38356e-06	5.91614e-06	0.000516571	2.78816e-05
Reactome_NSP13 P77L	DAVID Reactome	R-HSA-5663205~Infectious disease	720011233	Q9Y3U8, Q14204, P04899, P04439, P12235, Q9Y4I1, P63261, P61981, Q99961, P61088, Q00610, Q9UK41, P40429, P27824, Q96HA1, O94973, Q14697, Q13509, Q8N1F7, P31146, P57678, O00159, P42677, Q9BUF5, Q92621, Q5SRE5, P05023, P62841, P46977, P61513, P46734, Q9UNX3	32	153	960	10946	16.0804	2.38475	2.66728e-06	6.58635e-06	0.00445561	0.000687924	0.000262679	0.022936	0.00131533
Reactome_NSP13 P77L	DAVID Reactome	R-HSA-168255~Influenza Infection	720010045	Q9Y3U8, P42677, Q00610, P40429, Q92621, Q5SRE5, Q8N1F7, P27824, P62841, Q9UNX3, P61513, Q96HA1	12	153	157	10946	6.03015	5.46822	1.92794e-06	1.13153e-05	0.00764244	0.000994325	0.000426208	0.0372146	0.00225971
Reactome_NSP13 P77L	DAVID Reactome	R-HSA-5653656~Vesicle-mediated transport	720011168	P04114, Q14204, O95235, Q14789, Q9UID3, Q14807, Q9Y4I1, P62330, P63261, P61981, Q99961, Q00610, Q9UK41, Q9H0B6, O94973, Q9Y678, Q15643, Q9NP72, Q5JRA6, Q13509, Q9UPM8, O75396, Q9Y4L1, O00159, Q9BUF5	25	153	673	10946	12.5628	2.6576	6.30538e-06	1.74453e-05	0.0117584	0.00162547	0.000622522	0.0543559	0.0034839
Reactome_NSP13 P77L	DAVID Reactome	R-HSA-199991~Membrane Trafficking	720010272	P04114, O94973, Q14204, O95235, Q9Y678, Q15643, Q9NP72, Q14789, Q5JRA6, Q9UID3, Q13509, Q14807, Q9UPM8, O75396, Q9Y4I1, O00159, P62330, Q9BUF5, P63261, P61981, Q99961, Q00610, Q9UK41, Q9H0B6	24	153	634	10946	12.0603	2.70823	7.21e-06	2.03474e-05	0.0137009	0.00185846	0.000689776	0.0602283	0.00406344
Reactome_NSP13 P77L	DAVID Reactome	R-HSA-72689~Formation of a pool of free 40S subunits	720011486	Q9Y3U8, P42677, O15372, P40429, Q7L2H7, Q9UBQ5, P62841, Q9UNX3, P61513	9	153	102	10946	4.52261	6.31257	1.21817e-05	8.36888e-05	0.0551635	0.0124929	0.00270195	0.235923	0.0167124
Reactome_NSP13 P77L	DAVID Reactome	R-HSA-168273~Influenza Viral RNA Transcription and Replication	720010050	Q9Y3U8, P42677, P40429, Q92621, Q5SRE5, Q8N1F7, P62841, Q9UNX3, P61513, Q96HA1	10	153	136	10946	5.02513	5.26048	1.99895e-05	0.000113155	0.0738542	0.015353	0.00348724	0.30449	0.0225964
Reactome_NSP13 P77L	DAVID Reactome	R-HSA-156827~L13a-mediated translational silencing of Ceruloplasmin expression	720009919	Q9Y3U8, P42677, O15372, P40429, Q7L2H7, Q9UBQ5, P62841, Q9UNX3, P61513	9	153	112	10946	4.52261	5.74895	2.59548e-05	0.000161466	0.103702	0.0264301	0.00465793	0.40671	0.0322431
Reactome_NSP13 P77L	DAVID Reactome	R-HSA-1643685~Disease	720009979	Q9Y3U8, Q14204, P04899, P04439, Q14789, P11166, P12235, Q9Y4I1, P48507, P63261, P61981, O60762, Q9NR09, Q99961, P61088, Q00610, Q9UK41, P40429, P02545, P27824, Q92614, Q96HA1, O94973, Q14697, Q15643, Q86W92, Q13509, Q9Y4H2, Q8N1F7, P31146, P57678, O00159, P42677, Q9BUF5, Q04721, Q92621, Q5SRE5, P05023, P62841, P46977, P61513, P46734, Q9UNX3	43	153	1748	10946	21.608	1.75991	9.29794e-05	0.000168525	0.107982	0.0237043	0.00465793	0.40671	0.0336525
Reactome_NSP13 P77L	DAVID Reactome	R-HSA-72706~GTP hydrolysis and joining of the 60S ribosomal subunit	720011489	Q9Y3U8, P42677, O15372, P40429, Q7L2H7, Q9UBQ5, P62841, Q9UNX3, P61513	9	153	113	10946	4.52261	5.69807	2.78685e-05	0.000171753	0.109933	0.0558983	0.00465793	0.40671	0.034297
Reactome_NSP13 P77L	DAVID Reactome	R-HSA-72737~Cap-dependent Translation Initiation	720011491	Q9Y3U8, P42677, O15372, P40429, Q7L2H7, Q9UBQ5, P62841, Q9UNX3, P61513	9	153	120	10946	4.52261	5.36569	4.49255e-05	0.000259916	0.161588	0.0341755	0.00652677	0.569889	0.0518999
Reactome_NSP13 P77L	DAVID Reactome	R-HSA-72613~Eukaryotic Translation Initiation	720011483	Q9Y3U8, P42677, O15372, P40429, Q7L2H7, Q9UBQ5, P62841, Q9UNX3, P61513	9	153	120	10946	4.52261	5.36569	4.49255e-05	0.000259916	0.161588	0.0341755	0.00652677	0.569889	0.0518999
Reactome_NSP13 P77L	DAVID Reactome	R-HSA-2132295~MHC class II antigen presentation	720010366	O94973, Q14204, Q9BUF5, O95235, Q00610, Q14807, Q13509, Q9H0B6, P27824	9	153	123	10946	4.52261	5.23482	5.45639e-05	0.000307621	0.188279	0.0139792	0.00744881	0.650398	0.0614241
Reactome_NSP13 P77L	DAVID Reactome	R-HSA-70171~Glycolysis	720011450	P17858, P04406, Q92621, Q5SRE5, Q8N1F7, P52789, Q96HA1	7	153	71	10946	3.51759	7.05348	5.71375e-05	0.000442373	0.259178	0.0572626	0.0103424	0.903052	0.0883249
Reactome_NSP13 P77L	DAVID Reactome	R-HSA-6811442~Intra-Golgi and retrograde Golgi-to-ER traffic	720011395	Q14204, Q9BUF5, O95235, Q9Y678, Q15643, Q9NP72, Q9UID3, Q14807, Q13509, Q9H0B6, O75396	11	153	202	10946	5.52764	3.89588	0.000122245	0.000506377	0.290653	0.031049	0.0113922	0.994721	0.101101
Reactome_NSP13 P77L	DAVID Reactome	R-HSA-8856688~Golgi-to-ER retrograde transport	720011624	Q14204, Q9BUF5, O95235, Q9Y678, Q9NP72, Q14807, Q13509, Q9H0B6, O75396	9	153	133	10946	4.52261	4.84122	0.00010023	0.000520884	0.297599	0.025529	0.0113922	0.994721	0.103996
Reactome_NSP13 P77L	DAVID Reactome	R-HSA-392499~Metabolism of proteins	720010689	Q9Y3U8, P04114, Q14204, Q9Y287, O43852, P04439, Q14789, Q12904, P78527, Q9Y4I1, Q9NYU2, O60762, Q9P2J5, Q15181, P61088, P40429, Q9UBQ5, Q9Y2T2, P27824, O60282, Q93008, Q96HA1, P61619, O15372, Q14697, Q9Y678, Q9NP72, Q5JRA6, Q13509, Q86VP6, Q8N1F7, O00255, O43303, O75396, P42677, Q9BUF5, Q92621, Q5SRE5, Q7L2H7, Q8IUZ0, Q15477, P62841, P46977, P61513, Q9UNX3	45	153	1970	10946	22.6131	1.63422	0.00034696	0.000584067	0.327069	0.0856402	0.0122105	1.06617	0.116607
Reactome_NSP13 P77L	DAVID Reactome	R-HSA-2995410~Nuclear Envelope (NE) Reassembly	720010490	Q9BUF5, Q92621, Q13509, Q5SRE5, Q8N1F7, P02545, Q96HA1	7	153	75	10946	3.51759	6.6773	8.13926e-05	0.000594317	0.331732	0.0805693	0.0122105	1.06617	0.118653
Reactome_NSP13 P77L	DAVID Reactome	R-HSA-72766~Translation	720011493	P61619, Q9Y3U8, O15372, Q12904, P42677, Q9P2J5, Q15181, P40429, Q7L2H7, Q9UBQ5, P62841, Q9UNX3, P61513	13	153	292	10946	6.53266	3.18511	0.000224972	0.000757063	0.401592	0.0563966	0.0150967	1.31818	0.151133
Reactome_NSP13 P77L	DAVID Reactome	R-HSA-9694516~SARS-CoV-2 Infection	720012126	Q14697, P04439, Q8N1F7, P57678, P42677, P61981, P61088, Q92621, Q5SRE5, P27824, P62841, P46977, Q96HA1	13	153	299	10946	6.53266	3.11054	0.000283301	0.000930879	0.468169	0.136019	0.0180325	1.57452	0.185815
Reactome_NSP13 P77L	DAVID Reactome	R-HSA-2408522~Selenoamino acid metabolism	720010424	Q9Y3U8, P42677, Q9P2J5, P40429, Q12904, P62841, Q9UNX3, P61513	8	153	119	10946	4.0201	4.80958	0.000256654	0.00132686	0.593515	0.180184	0.0249892	2.18195	0.264806
Reactome_NSP13 P77L	DAVID Reactome	R-HSA-176033~Interactions of Vpr with host cellular proteins	720010112	Q92621, Q5SRE5, Q8N1F7, P12235, Q96HA1	5	153	36	10946	2.51256	9.93646	0.000132802	0.00149002	0.63614	0.401888	0.0273036	2.38403	0.297344
Reactome_NSP13 P77L	DAVID Reactome	R-HSA-70326~Glucose metabolism	720011454	P17858, P04406, Q92621, Q5SRE5, Q8N1F7, P52789, Q96HA1	7	153	91	10946	3.51759	5.50327	0.000275529	0.00164091	0.671576	0.347261	0.0292773	2.55637	0.327431
Reactome_NSP13 P77L	DAVID Reactome	R-HSA-9679506~SARS-CoV Infections	720012097	O94973, Q14697, P04439, Q8N1F7, P57678, P42677, P61981, P61088, Q92621, Q5SRE5, P27824, P05023, P62841, P46977, Q96HA1	15	153	414	10946	7.53769	2.59212	0.000676387	0.00184596	0.714273	0.160179	0.0320913	2.80207	0.368309
Reactome_NSP13 P77L	DAVID Reactome	R-HSA-9705683~SARS-CoV-2-host interactions	720012173	P42677, P61981, P04439, P61088, Q92621, Q5SRE5, Q8N1F7, P62841, P57678, Q96HA1	10	153	203	10946	5.02513	3.52426	0.000554251	0.00207749	0.755857	0.133277	0.0352134	3.07468	0.414456
Reactome_NSP13 P77L	DAVID Reactome	R-HSA-6811434~COPI-dependent Golgi-to-ER retrograde traffic	720011391	Q9BUF5, O95235, Q9Y678, Q14807, Q13509, Q9H0B6, O75396	7	153	99	10946	3.51759	5.05856	0.000461803	0.00251982	0.819241	0.379166	0.0416692	3.63837	0.502589
Reactome_NSP13 P77L	DAVID Reactome	R-HSA-9646399~Aggrephagy	720011981	Q14204, Q9BUF5, P61088, O95613, Q13509	5	153	43	10946	2.51256	8.31889	0.000313446	0.00289589	0.860021	0.817045	0.0467479	4.08183	0.57749
Reactome_NSP13 WT	DAVID Reactome	R-HSA-8854518~AURKA Activation by TPX2	720011621	O75935, Q96CS2, O15078, Q9BT25, Q68CZ6, O95613, Q9NVX0, Q9UPN4, Q8NHV4, P68371, O75330, Q99996, Q9H6D7, Q96MT8, Q99871, Q66GS9, Q96SN8, O94927, Q9HC77	19	285	73	10946	4.64548	9.99635	1.94917e-14	2.52894e-13	2.47851e-10	3.52891e-11	2.47836e-10	2.37973e-08	5.05262e-11
Reactome_NSP13 WT	DAVID Reactome	R-HSA-5620912~Anchoring of the basal body to the plasma membrane	720011127	Q5TB80, O75935, Q96CS2, O15078, Q9BT25, Q68CZ6, O95613, Q9NVX0, Q9UPN4, Q8NHV4, P68371, Q99996, Q9H6D7, Q96MT8, Q99871, Q66GS9, Q96QF0, Q9Y592, Q96SN8, O94927, Q9HC77	21	285	98	10946	5.13447	8.23008	5.37483e-14	5.44573e-13	5.33673e-10	4.15907e-11	2.66841e-10	2.56222e-08	1.08802e-10
Reactome_NSP13 WT	DAVID Reactome	R-HSA-380259~Loss of Nlp from mitotic centrosomes	720010621	O75935, Q96CS2, O15078, Q9BT25, Q68CZ6, O95613, Q9NVX0, Q9UPN4, Q8NHV4, P68371, Q99996, Q9H6D7, Q96MT8, Q99871, Q66GS9, Q96SN8, O94927, Q9HC77	18	285	70	10946	4.40098	9.87609	1.21588e-13	1.5535e-12	1.52246e-09	1.88189e-10	3.80607e-10	3.6546e-08	3.10385e-10
Reactome_NSP13 WT	DAVID Reactome	R-HSA-380284~Loss of proteins required for interphase microtubule organization from the centrosome	720010623	O75935, Q96CS2, O15078, Q9BT25, Q68CZ6, O95613, Q9NVX0, Q9UPN4, Q8NHV4, P68371, Q99996, Q9H6D7, Q96MT8, Q99871, Q66GS9, Q96SN8, O94927, Q9HC77	18	285	70	10946	4.40098	9.87609	1.21588e-13	1.5535e-12	1.52246e-09	1.88189e-10	3.80607e-10	3.6546e-08	3.10385e-10
Reactome_NSP13 WT	DAVID Reactome	R-HSA-2565942~Regulation of PLK1 Activity at G2/M Transition	720010458	O75935, Q96CS2, O15078, Q9BT25, Q68CZ6, O95613, Q9NVX0, Q9UPN4, Q8NHV4, P68371, Q96CV9, Q99996, Q9H6D7, Q96MT8, Q99871, Q66GS9, Q96SN8, O94927, Q9HC77	19	285	88	10946	4.64548	8.29242	7.66933e-13	7.83709e-12	7.68032e-09	1.18723e-09	1.53607e-09	1.47494e-07	1.56581e-09
Reactome_NSP13 WT	DAVID Reactome	R-HSA-380287~Centrosome maturation	720010624	O75935, Q96CS2, O15078, Q9BT25, Q68CZ6, O95613, Q9NVX0, Q9UPN4, Q8NHV4, P68371, Q99996, Q9H6D7, Q96MT8, Q99871, Q66GS9, Q96SN8, O94927, Q9HC77	18	285	82	10946	4.40098	8.43081	2.31526e-12	2.41439e-11	2.3661e-08	3.58402e-09	3.38015e-09	3.24564e-07	4.82386e-09
Reactome_NSP13 WT	DAVID Reactome	R-HSA-380270~Recruitment of mitotic centrosome proteins and complexes	720010622	O75935, Q96CS2, O15078, Q9BT25, Q68CZ6, O95613, Q9NVX0, Q9UPN4, Q8NHV4, P68371, Q99996, Q9H6D7, Q96MT8, Q99871, Q66GS9, Q96SN8, O94927, Q9HC77	18	285	82	10946	4.40098	8.43081	2.31526e-12	2.41439e-11	2.3661e-08	3.58402e-09	3.38015e-09	3.24564e-07	4.82386e-09
Reactome_NSP13 WT	DAVID Reactome	R-HSA-5653656~Vesicle-mediated transport	720011168	Q13439, Q9NP61, Q9UNF0, P51148, P51149, Q99961, Q9UJW0, Q96RU3, Q9UK41, Q92734, O75935, Q9NP72, Q12955, O75976, O95208, Q01082, Q9Y4L1, O00399, Q8IWJ2, Q8WUX9, O75061, Q96QF0, Q15276, O75886, Q14789, O95295, Q9Y6I3, Q96CV9, Q00610, Q9UJ41, O15498, P61923, P02786, Q99747, P11717, O94973, P26374, P53992, Q15643, Q9H3P7, Q8TD16, P14625, O43426, P68371, Q9NZZ3, O75396, Q96G01, Q9NZ52, Q96FJ2, P62820	50	285	673	10946	12.2249	2.85342	1.04314e-11	3.1674e-11	3.10405e-08	2.69131e-09	3.88007e-09	3.72565e-07	6.32834e-09
Reactome_NSP13 WT	DAVID Reactome	R-HSA-199991~Membrane Trafficking	720010272	Q13439, Q9NP61, O75886, Q14789, Q9UNF0, O95295, Q9Y6I3, P51148, Q96CV9, P51149, Q9UJW0, Q99961, Q96RU3, Q00610, Q9UK41, Q9UJ41, O15498, P61923, P02786, Q92734, Q99747, P11717, O75935, O94973, P26374, P53992, Q15643, O75976, Q9NP72, Q12955, O95208, Q9H3P7, Q8TD16, O43426, Q01082, P68371, O75396, O00399, Q8IWJ2, Q9NZZ3, Q96G01, Q8WUX9, O75061, Q9NZ52, Q96FJ2, Q96QF0, P62820, Q15276	48	285	634	10946	11.7359	2.90779	1.48685e-11	4.58828e-11	4.49651e-08	3.83609e-09	4.99613e-09	4.7973e-07	9.16719e-09
Reactome_NSP13 WT	DAVID Reactome	R-HSA-1852241~Organelle biogenesis and maintenance	720010160	O75947, O95613, Q9UPN4, P36405, Q6UUV9, Q04837, Q9H6D7, P18859, Q66GS9, Q9Y592, Q9HC77, O94927, Q5TB80, O75935, Q96CS2, Q15643, O15078, Q9BT25, Q68CZ6, Q9NP97, Q9NVX0, Q53ET0, P68371, Q8NHV4, Q99996, Q96FJ2, Q96MT8, Q99871, Q96QF0, Q96SN8, P06576	31	285	296	10946	7.57946	4.02236	3.24822e-11	1.42191e-10	1.39347e-07	8.38042e-09	1.39347e-08	1.33802e-06	2.84092e-08
Reactome_NSP13 WT	DAVID Reactome	R-HSA-380320~Recruitment of NuMA to mitotic centrosomes	720010625	O75935, Q96CS2, O15078, Q9BT25, Q68CZ6, O95613, Q9NVX0, Q9UPN4, Q8NHV4, P68371, Q99996, Q9H6D7, Q96MT8, Q99871, Q66GS9, Q96SN8, O94927, Q9HC77	18	285	94	10946	4.40098	7.35454	2.69003e-11	2.3706e-10	2.32319e-07	5.55221e-08	2.11199e-08	2.02794e-06	4.73638e-08
Reactome_NSP13 WT	DAVID Reactome	R-HSA-5617833~Cilium Assembly	720011064	O95613, Q9UPN4, P36405, Q9H6D7, Q66GS9, Q9Y592, Q9HC77, O94927, Q5TB80, O75935, Q96CS2, Q15643, O15078, Q9BT25, Q68CZ6, Q9NP97, Q9NVX0, P68371, Q8NHV4, Q99996, Q96FJ2, Q96MT8, Q99871, Q96QF0, Q96SN8	25	285	201	10946	6.11247	4.77699	7.34665e-11	3.91419e-10	3.8359e-07	3.79087e-08	3.19659e-08	3.06937e-06	7.82039e-08
Reactome_NSP13 WT	DAVID Reactome	R-HSA-9725370~Signaling by ALK fusions and activated point mutants	720012204	P26641, P29353, Q9H6R7, P19174, Q8IWJ2, Q8WU20, Q00610, P31939, P49589, P26038, P67936, Q92734, Q9P2E9	13	285	55	10946	3.17848	9.07802	1.04925e-09	1.19673e-08	1.17279e-05	3.7899e-06	8.37709e-07	8.04372e-05	2.39102e-06
Reactome_NSP13 WT	DAVID Reactome	R-HSA-9700206~Signaling by ALK in cancer	720012142	P26641, P29353, Q9H6R7, P19174, Q8IWJ2, Q8WU20, Q00610, P31939, P49589, P26038, P67936, Q92734, Q9P2E9	13	285	55	10946	3.17848	9.07802	1.04925e-09	1.19673e-08	1.17279e-05	3.7899e-06	8.37709e-07	8.04372e-05	2.39102e-06
Reactome_NSP13 WT	DAVID Reactome	R-HSA-69275~G2/M Transition	720011431	O75935, Q96CS2, O15078, P49454, Q9BT25, Q68CZ6, O95613, Q9NVX0, Q9UPN4, Q9NYZ3, Q8NHV4, P68371, Q96CV9, O75330, Q99996, Q9H6D7, Q96MT8, Q99871, Q66GS9, Q96SN8, O94927, Q9HC77	22	285	196	10946	5.37897	4.31099	7.4475e-09	3.54022e-08	3.46936e-05	1.92145e-06	2.31294e-06	0.00022209	7.07322e-06
Reactome_NSP13 WT	DAVID Reactome	R-HSA-453274~Mitotic G2-G2/M phases	720010865	O75935, Q96CS2, O15078, P49454, Q9BT25, Q68CZ6, O95613, Q9NVX0, Q9UPN4, Q9NYZ3, Q8NHV4, P68371, Q96CV9, O75330, Q99996, Q9H6D7, Q96MT8, Q99871, Q66GS9, Q96SN8, O94927, Q9HC77	22	285	198	10946	5.37897	4.26745	8.99926e-09	4.22978e-08	4.1451e-05	2.32181e-06	2.59074e-06	0.000248764	8.45094e-06
Reactome_NSP13 WT	DAVID Reactome	R-HSA-68877~Mitotic Prometaphase	720011404	P30622, O75935, Q96CS2, O15078, P49454, Q9BT25, Q68CZ6, O95613, Q9NVX0, Q9UPN4, Q8NHV4, P68371, Q99996, Q9H6D7, Q96FJ2, Q96MT8, Q99871, Q66GS9, Q96SN8, Q96FF9, O94927, Q9HC77	22	285	204	10946	5.37897	4.14193	1.56477e-08	7.11706e-08	6.97447e-05	4.03711e-06	4.10277e-06	0.00039395	1.42196e-05
Reactome_NSP13 WT	DAVID Reactome	R-HSA-379716~Cytosolic tRNA aminoacylation	720010616	P54577, P49591, Q15181, P47897, Q12904, P49589, P49588, O43776, Q15046	9	285	24	10946	2.20049	14.4026	4.50058e-09	9.54116e-08	9.3499e-05	3.36728e-05	5.19463e-06	0.000498791	1.90629e-05
Reactome_NSP13 WT	DAVID Reactome	R-HSA-9012999~RHO GTPase cycle	720011779	Q13017, Q9NP61, O75886, P12814, O43639, A6NGB9, P51149, Q8WU20, Q86YQ8, Q96RU3, Q00610, Q9UQB8, O15498, P61586, P02786, P80723, Q12774, Q6XZF7, O75976, P31948, Q9Y597, Q01082, Q08378, P34897, Q86UP2, Q96JJ3, Q8TBC3, P20700, Q8TDM6, Q16543, Q16643, P67936, Q9UHR4	33	285	449	10946	8.06846	2.82279	6.44265e-08	1.93228e-07	0.000189345	1.66219e-05	9.96649e-06	0.000956986	3.86062e-05
Reactome_NSP13 WT	DAVID Reactome	R-HSA-379724~tRNA Aminoacylation	720010617	P54577, P49591, Q6PI48, Q15181, P47897, Q12904, P49589, P49588, O43776, Q15046	10	285	42	10946	2.44499	9.14453	8.61563e-08	9.87235e-07	0.000967023	0.000311148	4.83745e-05	0.00464494	0.000197246
Reactome_NSP13 WT	DAVID Reactome	R-HSA-68886~M Phase	720011408	P30622, O95613, Q9UPN4, Q9H8Y8, Q9H6D7, Q66GS9, P02545, Q9HC77, Q8NFH5, O94927, O75935, Q96CS2, O15078, P49454, Q9BT25, Q68CZ6, Q9NVX0, O75694, P68371, Q8NHV4, Q8WUX9, Q99996, P20700, Q96FJ2, Q96MT8, Q99871, Q96SN8, P62820, P61019, Q96FF9	30	285	418	10946	7.33496	2.75648	4.40604e-07	1.30193e-06	0.00127508	0.00011367	6.07569e-05	0.0058339	0.000260121
Reactome_NSP13 WT	DAVID Reactome	R-HSA-194315~Signaling by Rho GTPases	720010232	P30622, Q13017, Q9NP61, O75886, P12814, O43639, A6NGB9, P51149, Q7Z406, P35221, Q8WU20, Q86YQ8, P23528, Q96RU3, P35240, Q00610, Q9UQB8, O15498, P61586, P02786, P80723, Q12774, Q6XZF7, O75976, P49454, P31948, Q9Y597, Q01082, Q08378, P68371, P34897, Q86UP2, Q96JJ3, Q8TBC3, P20700, Q8TDM6, Q96FJ2, Q16543, Q16643, P67936, Q9UHR4	41	285	707	10946	10.0244	2.22728	1.00543e-06	2.34746e-06	0.00229787	0.000259368	0.000104569	0.0100407	0.000469013
Reactome_NSP13 WT	DAVID Reactome	R-HSA-69278~Cell Cycle, Mitotic	720011432	P30622, O95613, P31350, Q9UPN4, Q9H8Y8, Q96CV9, Q9H6D7, Q66GS9, P02545, Q9HC77, Q8NFH5, O94927, O75935, Q96CS2, O15078, P49454, Q9BT25, Q68CZ6, Q9NVX0, O75694, Q9NYZ3, P68371, O75330, Q8NHV4, P12004, Q8WUX9, Q99996, P20700, Q96FJ2, Q96MT8, Q99871, Q96SN8, P62820, P61019, Q96FF9	35	285	561	10946	8.55746	2.39616	1.30225e-06	3.28625e-06	0.00321535	0.000335925	0.000140023	0.013445	0.000656579
Reactome_NSP13 WT	DAVID Reactome	R-HSA-9716542~Signaling by Rho GTPases, Miro GTPases and RHOBTB3	720012192	P30622, Q13017, Q9NP61, O75886, P12814, O43639, A6NGB9, P51149, Q7Z406, P35221, Q8WU20, Q86YQ8, P23528, Q96RU3, P35240, Q00610, Q9UQB8, O15498, P61586, P02786, P80723, Q12774, Q6XZF7, O75976, P49454, P31948, Q9Y597, Q01082, Q08378, P68371, P34897, Q86UP2, Q96JJ3, Q8TBC3, P20700, Q8TDM6, Q96FJ2, Q16543, Q16643, P67936, Q9UHR4	41	285	723	10946	10.0244	2.17799	1.75737e-06	4.01327e-06	0.00392529	0.000453298	0.000163875	0.0157354	0.000801834
Reactome_NSP13 WT	DAVID Reactome	R-HSA-1640170~Cell Cycle	720009978	P30622, O95613, Q15819, P31350, Q9UPN4, Q9H8Y8, Q96CV9, Q9H6D7, Q9NX24, P61088, Q66GS9, P02545, Q9HC77, Q8NFH5, O94927, O75935, Q96CS2, O15078, P49454, Q9BT25, Q8WXH0, Q68CZ6, Q9NVX0, O75694, Q9NYZ3, P68371, O75330, Q8NHV4, P12004, Q8WUX9, Q99996, P20700, Q96FJ2, Q96MT8, Q99871, Q96SN8, P62820, P61019, Q96FF9	39	285	692	10946	9.53545	2.16456	3.75569e-06	8.59e-06	0.0083829	0.0009685	0.000336728	0.0323328	0.00171624
Reactome_NSP13 WT	DAVID Reactome	R-HSA-199977~ER to Golgi Anterograde Transport	720010271	O75935, P53992, Q12955, Q9NP61, Q14789, Q01082, P68371, O00399, O75396, Q9UJW0, Q96FJ2, O15498, P61923, Q92734, P62820, Q99747	16	285	154	10946	3.91198	3.99034	2.47399e-06	1.08423e-05	0.0105693	0.00191304	0.00040745	0.0391235	0.00216624
Reactome_NSP13 WT	DAVID Reactome	R-HSA-6807878~COPI-mediated anterograde transport	720011388	O75935, Q12955, Q9NP61, Q14789, Q01082, P68371, O00399, Q9UJW0, Q96FJ2, O15498, P61923, P62820, Q99747	13	285	101	10946	3.17848	4.94348	2.02061e-06	1.12257e-05	0.0109409	0.00104209	0.00040745	0.0391235	0.00224283
Reactome_NSP13 WT	DAVID Reactome	R-HSA-6811442~Intra-Golgi and retrograde Golgi-to-ER traffic	720011395	P11717, O75935, Q15643, Q13439, Q9NP61, Q9NP72, Q8TD16, P68371, O00399, Q8IWJ2, O75396, Q96G01, Q9UJW0, Q96FJ2, O15498, P61923, P62820, Q99747	18	285	202	10946	4.40098	3.42241	5.34294e-06	1.96017e-05	0.0190265	0.00137753	0.00068606	0.0658758	0.00391631
Reactome_NSP13 WT	DAVID Reactome	R-HSA-446203~Asparagine N-linked glycosylation	720010831	O75935, P53992, Q14697, Q12955, Q9NP61, Q14789, Q04323, Q01082, P30101, P68371, O00399, O75396, P14314, O75352, Q9UJW0, Q96FJ2, O15498, P61923, Q8TBE9, Q92734, P62820, Q99747	22	285	304	10946	5.37897	2.77946	1.4311e-05	4.28173e-05	0.0410936	0.00368546	0.00144693	0.138935	0.00855454
Reactome_NSP13 WT	DAVID Reactome	R-HSA-9609507~Protein localization	720011913	P34913, Q9BTZ2, Q9Y5L4, P51659, P11441, P12235, Q9NRP2, O00116, Q9Y3D6, O60220, P46379, P10809, P21796, Q9HAV7, P06576	15	285	163	10946	3.66748	3.53439	2.23662e-05	8.60842e-05	0.0809053	0.0114747	0.00281208	0.270017	0.0171985
Reactome_NSP13 WT	DAVID Reactome	R-HSA-432722~Golgi Associated Vesicle Biogenesis	720010796	O75061, P11717, O75976, Q14789, Q9H3P7, Q00610, O95295, P51148, P02786	9	285	56	10946	2.20049	6.17256	1.25497e-05	8.96344e-05	0.0840978	0.0287201	0.0028336	0.272084	0.0179078
Reactome_NSP13 WT	DAVID Reactome	R-HSA-948021~Transport to the Golgi and subsequent modification	720011903	O75935, P53992, Q12955, Q9NP61, Q14789, Q01082, P68371, O00399, O75396, Q9UJW0, Q96FJ2, O15498, P61923, Q92734, P62820, Q99747	16	285	185	10946	3.91198	3.32169	2.59278e-05	9.32147e-05	0.087306	0.0198683	0.0028547	0.274109	0.0186231
Reactome_NSP13 WT	DAVID Reactome	R-HSA-5663202~Diseases of signal transduction by growth factor receptors and second messengers	720011232	P26641, P29353, Q13439, P19174, Q14789, Q6WCQ1, Q8WU20, Q00610, P31939, Q13480, P02545, P26038, Q92734, Q13363, Q15643, Q12778, Q9H6R7, Q9Y4H2, Q01082, Q86YT6, Q8IWJ2, Q99996, P49589, Q16543, P67936, Q9P2E9	26	285	433	10946	6.35697	2.3062	6.19792e-05	0.00015072	0.137324	0.0158639	0.00447592	0.42978	0.0301109
Reactome_NSP13 WT	DAVID Reactome	R-HSA-8856688~Golgi-to-ER retrograde transport	720011624	O75935, Q9NP61, Q9NP72, Q8TD16, P68371, O00399, O75396, Q96G01, Q9UJW0, Q96FJ2, P61923, P62820, Q99747	13	285	133	10946	3.17848	3.75407	4.20357e-05	0.000172886	0.155865	0.0107869	0.00498318	0.478487	0.0345389
Reactome_NSP13 WT	DAVID Reactome	R-HSA-9013148~CDC42 GTPase cycle	720011782	Q12774, Q13017, Q6XZF7, Q9NP61, Q9Y597, A6NGB9, P51149, Q86UP2, Q8TBC3, Q86YQ8, Q96RU3, Q9UQB8, O15498, P02786	14	285	155	10946	3.42298	3.46902	5.16104e-05	0.000194925	0.173905	0.0132276	0.00545791	0.52407	0.0389415
Reactome_NSP13 WT	DAVID Reactome	R-HSA-6811436~COPI-independent Golgi-to-ER retrograde traffic	720011392	O75935, Q9NP72, Q9UJW0, Q96FJ2, Q8TD16, P68371, O00399, Q96G01	8	285	51	10946	1.95599	6.02463	4.60875e-05	0.000320018	0.269238	0.112111	0.00871159	0.83649	0.0639281
Reactome_NSP13 WT	DAVID Reactome	R-HSA-8856828~Clathrin-mediated endocytosis	720011626	P11717, O94973, O95208, O75886, Q9UNF0, O43426, Q9Y6I3, P51148, O75061, Q99961, Q96RU3, Q00610, P02786	13	285	146	10946	3.17848	3.4198	0.000110506	0.000411565	0.331966	0.08198	0.0109009	1.04671	0.0822121
Reactome_NSP13 WT	DAVID Reactome	R-HSA-199992~trans-Golgi Network Vesicle Budding	720010273	O75061, P11717, O75976, Q14789, Q9H3P7, Q00610, O95295, P51148, P02786	9	285	72	10946	2.20049	4.80088	9.79762e-05	0.000527935	0.403999	0.118734	0.0136152	1.30733	0.105452
Reactome_NSP13 WT	DAVID Reactome	R-HSA-9013408~RHOG GTPase cycle	720011788	Q12774, Q96JJ3, Q13017, Q9NP61, O15498, P02786, P51149, Q86UP2, P34897	9	285	74	10946	2.20049	4.67112	0.00012158	0.000635754	0.463794	0.245972	0.0159753	1.53396	0.126981
Reactome_NSP13 WT	DAVID Reactome	R-HSA-1428517~The citric acid (TCA) cycle and respiratory electron transport	720009865	O75947, P53597, P08559, P13804, P14927, P10515, Q9P2R7, P21912, P18859, P42704, P22695, P47985, P21796, P06576	14	285	178	10946	3.42298	3.02078	0.000227383	0.000742509	0.517092	0.0569834	0.0181915	1.74675	0.148295
Reactome_NSP13 WT	DAVID Reactome	R-HSA-9696270~RND2 GTPase cycle	720012138	Q13017, Q8TDM6, Q8WU20, Q96RU3, Q08378, P02786, Q86UP2	7	285	43	10946	1.71149	6.25231	0.000108682	0.000786561	0.537511	0.445048	0.0188007	1.80525	0.15709
Reactome_NSP13 WT	DAVID Reactome	R-HSA-1268020~Mitochondrial protein import	720009814	Q9Y5L4, O60220, P10809, P12235, P21796, Q9NRP2, Q9HAV7, P06576	8	285	64	10946	1.95599	4.80088	0.000239107	0.00128927	0.717562	0.389561	0.0300829	2.88857	0.257425
Reactome_NSP2 T85I	DAVID Reactome	R-HSA-72312~rRNA processing	720011482	Q9Y3U8, Q07020, Q9UNQ2, P46087, P26373, Q13601, Q9NW13, P50914, Q02543, P62241, P40429, P62910, P46776, Q99848, P46778, Q99714	16	88	205	10946	13.6752	9.7082	5.63608e-12	5.88867e-11	2.65579e-08	4.3623e-09	2.65579e-08	2.40258e-06	1.17513e-08
Reactome_NSP2 T85I	DAVID Reactome	R-HSA-8868773~rRNA processing in the nucleus and cytosol	720011644	Q9Y3U8, Q07020, Q9UNQ2, P46087, P26373, Q13601, Q9NW13, P50914, Q02543, P62241, P40429, P62910, P46776, Q99848, P46778	15	88	195	10946	12.8205	9.56818	3.41848e-11	3.51672e-10	1.58604e-07	8.81967e-09	7.9302e-08	7.17411e-06	7.01788e-08
Reactome_NSP2 T85I	DAVID Reactome	R-HSA-192823~Viral mRNA Translation	720010210	Q9Y3U8, Q07020, P50914, Q02543, P26373, P62241, P62910, P40429, Q12849, P46776, P46778	11	88	90	10946	9.40171	15.2028	1.18412e-10	2.01941e-09	9.10754e-07	2.13853e-07	3.03585e-07	2.7464e-05	4.02989e-07
Reactome_NSP2 T85I	DAVID Reactome	R-HSA-156842~Eukaryotic Translation Elongation	720009920	Q9Y3U8, Q07020, P50914, Q02543, P26373, P62241, P62910, P40429, P24534, P46776, P46778	11	88	94	10946	9.40171	14.5559	1.91464e-10	3.11049e-09	1.40283e-06	3.95181e-07	3.14725e-07	2.84718e-05	6.20721e-07
Reactome_NSP2 T85I	DAVID Reactome	R-HSA-168255~Influenza Infection	720010045	Q9Y3U8, Q07020, P26373, Q12849, P50914, Q02543, P62241, Q00610, P40429, P62910, P27824, P46776, P46778	13	88	157	10946	11.1111	10.2995	3.1336e-10	3.48919e-09	1.57362e-06	1.61694e-07	3.14725e-07	2.84718e-05	6.96294e-07
Reactome_NSP2 T85I	DAVID Reactome	R-HSA-71291~Metabolism of amino acids and derivatives	720011466	Q9Y3U8, Q07020, P08559, P10515, P26373, P11177, Q9HCC0, Q9Y617, Q02218, Q96RQ3, P50914, Q02543, P62241, P40429, P62910, P46776, P46778, Q99714	18	88	376	10946	15.3846	5.95467	7.92025e-10	4.94068e-09	2.22824e-06	2.04343e-07	3.71374e-07	3.35966e-05	9.85949e-07
Reactome_NSP2 T85I	DAVID Reactome	R-HSA-1799339~SRP-dependent cotranslational protein targeting to membrane	720010133	Q9Y3U8, Q07020, O76094, P50914, Q02543, P26373, P62241, P62910, P40429, P46776, P46778	11	88	113	10946	9.40171	12.1084	1.42499e-09	1.89012e-08	8.5244e-06	2.94117e-06	1.21778e-06	0.000110167	3.77188e-06
Reactome_NSP2 T85I	DAVID Reactome	R-HSA-6791226~Major pathway of rRNA processing in the nucleolus and cytosol	720011341	Q9Y3U8, Q07020, P26373, Q13601, Q9NW13, P50914, Q02543, P62241, P40429, P62910, P46776, Q99848, P46778	13	88	185	10946	11.1111	8.74066	2.39116e-09	2.23437e-08	1.00769e-05	1.85075e-06	1.25963e-06	0.000113953	4.45885e-06
Reactome_NSP2 T85I	DAVID Reactome	R-HSA-156902~Peptide chain elongation	720009921	Q9Y3U8, Q07020, P50914, Q02543, P26373, P62241, P62910, P40429, P46776, P46778	10	88	90	10946	8.54701	13.8207	2.26313e-09	3.46927e-08	1.56463e-05	4.0872e-06	1.73849e-06	0.000157273	6.92318e-06
Reactome_NSP2 T85I	DAVID Reactome	R-HSA-2408557~Selenocysteine synthesis	720010427	Q9Y3U8, Q07020, P50914, Q02543, P26373, P62241, P62910, P40429, P46776, P46778	10	88	94	10946	8.54701	13.2326	3.48472e-09	5.09199e-08	2.29646e-05	7.19244e-06	2.08772e-06	0.000188867	1.01615e-05
Reactome_NSP2 T85I	DAVID Reactome	R-HSA-72764~Eukaryotic Translation Termination	720011492	Q9Y3U8, Q07020, P50914, Q02543, P26373, P62241, P62910, P40429, P46776, P46778	10	88	94	10946	8.54701	13.2326	3.48472e-09	5.09199e-08	2.29646e-05	7.19244e-06	2.08772e-06	0.000188867	1.01615e-05
Reactome_NSP2 T85I	DAVID Reactome	R-HSA-975956~Nonsense Mediated Decay (NMD) independent of the Exon Junction Complex (EJC)	720012258	Q9Y3U8, Q07020, P50914, Q02543, P26373, P62241, P62910, P40429, P46776, P46778	10	88	96	10946	8.54701	12.9569	4.29124e-09	6.12724e-08	2.76335e-05	5.53568e-06	2.21087e-06	0.000200008	1.22274e-05
Reactome_NSP2 T85I	DAVID Reactome	R-HSA-72766~Translation	720011493	Q9Y3U8, Q07020, P82914, Q9NP81, P26373, O76094, P50914, Q02543, P62241, Q6P161, P40429, P24534, P62910, P46776, P46778	15	88	292	10946	12.8205	6.38971	9.48265e-09	6.37281e-08	2.8741e-05	2.44652e-06	2.21087e-06	0.000200008	1.27174e-05
Reactome_NSP2 T85I	DAVID Reactome	R-HSA-72689~Formation of a pool of free 40S subunits	720011486	Q9Y3U8, Q07020, P50914, Q02543, P26373, P62241, P62910, P40429, P46776, P46778	10	88	102	10946	8.54701	12.1947	7.7926e-09	1.04134e-07	4.69632e-05	8.04193e-06	3.13096e-06	0.000283244	2.07807e-05
Reactome_NSP2 T85I	DAVID Reactome	R-HSA-9633012~Response of EIF2AK4 (GCN2) to amino acid deficiency	720011951	Q9Y3U8, Q07020, P50914, Q02543, P26373, P62241, P62910, P40429, P46776, P46778	10	88	102	10946	8.54701	12.1947	7.7926e-09	1.04134e-07	4.69632e-05	8.04193e-06	3.13096e-06	0.000283244	2.07807e-05
Reactome_NSP2 T85I	DAVID Reactome	R-HSA-168273~Influenza Viral RNA Transcription and Replication	720010050	Q9Y3U8, Q07020, P50914, Q02543, P26373, P62241, P62910, P40429, Q12849, P46776, P46778	11	88	136	10946	9.40171	10.0607	1.02764e-08	1.11583e-07	5.03227e-05	7.9539e-06	3.14525e-06	0.000284537	2.22673e-05
Reactome_NSP2 T85I	DAVID Reactome	R-HSA-71406~Pyruvate metabolism and Citric Acid (TCA) cycle	720011471	P21912, Q02218, P08559, P10515, P31040, P11177, P35613, P21796	8	88	55	10946	6.83761	18.0926	1.1298e-08	2.33737e-07	0.00010541	4.08077e-05	5.86829e-06	0.000530879	4.6644e-05
Reactome_NSP2 T85I	DAVID Reactome	R-HSA-156827~L13a-mediated translational silencing of Ceruloplasmin expression	720009919	Q9Y3U8, Q07020, P50914, Q02543, P26373, P62241, P62910, P40429, P46776, P46778	10	88	112	10946	8.54701	11.1059	1.93969e-08	2.34211e-07	0.000105624	2.00174e-05	5.86829e-06	0.000530879	4.67386e-05
Reactome_NSP2 T85I	DAVID Reactome	R-HSA-72706~GTP hydrolysis and joining of the 60S ribosomal subunit	720011489	Q9Y3U8, Q07020, P50914, Q02543, P26373, P62241, P62910, P40429, P46776, P46778	10	88	113	10946	8.54701	11.0076	2.11417e-08	2.52844e-07	0.000114026	4.36356e-05	6.00171e-06	0.000542949	5.04569e-05
Reactome_NSP2 T85I	DAVID Reactome	R-HSA-975957~Nonsense Mediated Decay (NMD) enhanced by the Exon Junction Complex (EJC)	720012259	Q9Y3U8, Q07020, P50914, Q02543, P26373, P62241, P62910, P40429, P46776, P46778	10	88	116	10946	8.54701	10.723	2.72379e-08	3.16689e-07	0.000142816	3.51363e-05	6.80126e-06	0.000615281	6.31976e-05
Reactome_NSP2 T85I	DAVID Reactome	R-HSA-927802~Nonsense-Mediated Decay (NMD)	720011890	Q9Y3U8, Q07020, P50914, Q02543, P26373, P62241, P62910, P40429, P46776, P46778	10	88	116	10946	8.54701	10.723	2.72379e-08	3.16689e-07	0.000142816	3.51363e-05	6.80126e-06	0.000615281	6.31976e-05
Reactome_NSP2 T85I	DAVID Reactome	R-HSA-2408522~Selenoamino acid metabolism	720010424	Q9Y3U8, Q07020, P50914, Q02543, P26373, P62241, P62910, P40429, P46776, P46778	10	88	119	10946	8.54701	10.4526	3.48382e-08	3.94096e-07	0.000177722	2.69644e-05	7.95473e-06	0.00071963	7.86449e-05
Reactome_NSP2 T85I	DAVID Reactome	R-HSA-72737~Cap-dependent Translation Initiation	720011491	Q9Y3U8, Q07020, P50914, Q02543, P26373, P62241, P62910, P40429, P46776, P46778	10	88	120	10946	8.54701	10.3655	3.77582e-08	4.23312e-07	0.000190895	2.92244e-05	7.95473e-06	0.00071963	8.4475e-05
Reactome_NSP2 T85I	DAVID Reactome	R-HSA-72613~Eukaryotic Translation Initiation	720011483	Q9Y3U8, Q07020, P50914, Q02543, P26373, P62241, P62910, P40429, P46776, P46778	10	88	120	10946	8.54701	10.3655	3.77582e-08	4.23312e-07	0.000190895	2.92244e-05	7.95473e-06	0.00071963	8.4475e-05
Reactome_NSP2 T85I	DAVID Reactome	R-HSA-9711097~Cellular response to starvation	720012189	Q9Y3U8, Q07020, P50914, Q02543, P26373, P62241, P62910, P40429, P46776, P46778	10	88	157	10946	8.54701	7.9227	4.78183e-07	4.03214e-06	0.00181685	0.000246712	7.27398e-05	0.00658045	0.000804642
Reactome_NSP2 T85I	DAVID Reactome	R-HSA-1430728~Metabolism	720009866	Q9Y3U8, P08559, P00492, P04899, P10515, O00763, P35613, Q02218, Q96RQ3, P50914, P60891, P31040, P62910, P40429, Q07020, P53992, P48047, P04406, P26373, Q12931, P52209, P11177, Q9HCC0, Q9Y617, P21912, Q02543, P62241, P04075, Q13232, P05166, P46776, P49748, Q9NRF8, P21796, P46778, Q99714	36	88	2118	10946	30.7692	2.11422	2.41779e-06	5.22491e-06	0.00235367	0.000623596	9.06321e-05	0.00819909	0.00104267
Reactome_NSP2 T85I	DAVID Reactome	R-HSA-9010553~Regulation of expression of SLITs and ROBOs	720011775	Q9Y3U8, Q07020, P50914, Q02543, P26373, P62241, P62910, P40429, P46776, P46778	10	88	172	10946	8.54701	7.23177	1.10825e-06	8.49513e-06	0.00382399	0.000285889	0.0001419	0.0128371	0.00169526
Reactome_NSP2 T85I	DAVID Reactome	R-HSA-1428517~The citric acid (TCA) cycle and respiratory electron transport	720009865	P21912, Q02218, P08559, P48047, P10515, Q12931, P31040, P11177, P35613, P21796	10	88	178	10946	8.54701	6.988	1.51535e-06	1.12086e-05	0.00504236	0.000390883	0.000180539	0.0163325	0.00223675
Reactome_NSP2 T85I	DAVID Reactome	R-HSA-1643685~Disease	720009979	Q9Y3U8, P00492, P04899, P05109, Q12849, P14314, P35613, P51149, Q96RQ3, P50914, P61981, Q99961, Q00610, P62910, P40429, P02545, P27824, O94905, Q07020, P53992, P26373, Q01082, Q9HCC0, P20700, Q02543, P62241, P04350, P05023, P05166, P46776, P46778	31	88	1748	10946	26.4957	2.20594	7.46492e-06	1.68791e-05	0.00758364	0.0019241	0.000262499	0.0237472	0.00336833
Reactome_NSP2 T85I	DAVID Reactome	R-HSA-392499~Metabolism of proteins	720010689	Q9Y3U8, Q9NP81, O43852, P18085, P78527, P14314, P30101, P51149, Q9NYU2, Q15084, P50914, P24534, P62910, P40429, P27824, Q14694, Q07020, P82914, P53992, Q9NP72, P26373, P14625, Q01082, O76094, Q15293, Q02543, P62241, Q6P161, P04350, P46776, P21796, P46778, Q14165	33	88	1970	10946	28.2051	2.08363	1.13277e-05	2.41727e-05	0.0108428	0.0029183	0.000363397	0.0328749	0.0048238
Reactome_NSP2 T85I	DAVID Reactome	R-HSA-8953854~Metabolism of RNA	720011712	Q9Y3U8, Q07020, Q9UNQ2, O43592, P46087, P26373, Q13601, Q9NW13, P50914, Q02543, P62241, P40429, P62910, P46776, Q99848, Q9C0C2, P46778, Q99714	18	88	716	10946	15.3846	3.12703	1.22607e-05	3.96748e-05	0.0177345	0.00315828	0.000577204	0.0522171	0.00791725
Reactome_NSP2 T85I	DAVID Reactome	R-HSA-5663205~Infectious disease	720011233	Q9Y3U8, Q07020, P53992, P04899, P26373, Q12849, P14314, P51149, P61981, P50914, Q99961, Q02543, P62241, Q00610, P40429, P62910, P04350, P27824, P05023, P46776, P46778	21	88	960	10946	17.9487	2.72095	1.71615e-05	4.81905e-05	0.0215	0.00441792	0.000679185	0.0614429	0.00961656
Reactome_NSP2 T85I	DAVID Reactome	R-HSA-376176~Signaling by ROBO receptors	720010607	Q9Y3U8, Q07020, P50914, Q02543, P26373, P62241, P62910, P40429, P46776, P46778	10	88	219	10946	8.54701	5.67974	9.67523e-06	5.77879e-05	0.0257264	0.00249311	0.000789768	0.0714469	0.0115317
Reactome_NSP2 T85I	DAVID Reactome	R-HSA-196780~Biotin transport and metabolism	720010246	Q96RQ3, O00763, P05166, Q9HCC0	4	88	11	10946	3.4188	45.2314	1.23291e-06	7.6425e-05	0.0338817	0.0185924	0.00101375	0.09171	0.0152506
Reactome_NSP2 T85I	DAVID Reactome	R-HSA-70268~Pyruvate metabolism	720011453	P08559, P10515, P11177, P35613, P21796	5	88	31	10946	4.2735	20.0623	4.31544e-06	9.94386e-05	0.0438582	0.029614	0.00128134	0.115917	0.0198427
Reactome_NSP2 T85I	DAVID Reactome	R-HSA-2262752~Cellular responses to stress	720010418	Q9Y3U8, Q07020, P26373, P52209, P14625, Q9Y4L1, P20700, Q15084, P50914, Q02543, P62241, P40429, P62910, P04350, P02545, P49748, P46776, P46778	18	88	789	10946	15.3846	2.83771	4.50488e-05	0.00013233	0.0579388	0.0115556	0.00165781	0.149975	0.0264058
Reactome_NSP2 T85I	DAVID Reactome	R-HSA-532668~N-glycan trimming in the ER and Calnexin/Calreticulin cycle	720010950	Q9NYU2, P27824, P14314, P30101, Q14165	5	88	35	10946	4.2735	17.7695	8.03915e-06	0.000161513	0.0702583	0.0266032	0.00194321	0.175793	0.0322286
Reactome_NSP2 T85I	DAVID Reactome	R-HSA-8953897~Cellular responses to stimuli	720011713	Q9Y3U8, Q07020, P26373, P52209, P14625, Q9Y4L1, P20700, Q15084, P50914, Q02543, P62241, P40429, P62910, P04350, P02545, P49748, P46776, P46778	18	88	803	10946	15.3846	2.78824	5.67194e-05	0.000163729	0.071187	0.0145275	0.00194321	0.175793	0.0326707
Reactome_NSP2 T85I	DAVID Reactome	R-HSA-901042~Calnexin/calreticulin cycle	720011774	Q9NYU2, P27824, P14314, P30101	4	88	26	10946	3.4188	19.1364	5.09368e-05	0.00110482	0.392589	0.178916	0.0127763	1.15581	0.220354
Reactome_NSP2 T85I	DAVID Reactome	R-HSA-3371599~Defective HLCS causes multiple carboxylase deficiency	720010558	Q96RQ3, P05166, Q9HCC0	3	88	7	10946	2.5641	53.3084	1.71702e-05	0.00127793	0.438259	0.236794	0.0144086	1.30349	0.254858
Reactome_NSP2 T85I	DAVID Reactome	R-HSA-422475~Axon guidance	720010756	Q9Y3U8, Q07020, P26373, Q01082, P50914, Q02543, P62241, Q00610, P40429, P62910, P04350, P46776, P46778	13	88	553	10946	11.1111	2.92409	0.000445038	0.00135729	0.458034	0.108496	0.0149301	1.35066	0.270674
Reactome_NSP2 T85I	DAVID Reactome	R-HSA-3323169~Defects in biotin (Btn) metabolism	720010537	Q96RQ3, P05166, Q9HCC0	3	88	8	10946	2.5641	46.6449	2.73125e-05	0.00169511	0.534732	0.385056	0.0182022	1.64667	0.337986
Reactome_NSP2 T85I	DAVID Reactome	R-HSA-389661~Glyoxylate metabolism and glycine degradation	720010660	Q02218, P08559, P10515, P11177	4	88	31	10946	3.4188	16.0499	0.000103968	0.00185614	0.567381	0.515327	0.0194679	1.76118	0.370065
Reactome_NSP2 T85I	DAVID Reactome	R-HSA-9675108~Nervous system development	720012086	Q9Y3U8, Q07020, P26373, Q01082, P50914, Q02543, P62241, Q00610, P40429, P62910, P04350, P46776, P46778	13	88	578	10946	11.1111	2.79762	0.000675635	0.00197293	0.589619	0.160016	0.0202225	1.82944	0.393326
Reactome_NSP2 T85I	DAVID Reactome	R-HSA-446203~Asparagine N-linked glycosylation	720010831	Q9NYU2, P53992, P18085, P04350, P27824, Q01082, P14314, P30101, Q14165	9	88	304	10946	7.69231	3.68249	0.000728445	0.00281632	0.719716	0.171391	0.0282258	2.55346	0.56123
Reactome_NSP2 T85I	DAVID Reactome	R-HSA-2132295~MHC class II antigen presentation	720010366	P53992, Q00610, Q9H0B6, P04350, P27824, P51149	6	88	123	10946	5.12821	6.06763	0.000455369	0.00292797	0.733519	0.11087	0.0287068	2.59698	0.583447
Reactome_NSP2 WT	DAVID Reactome	R-HSA-1428517~The citric acid (TCA) cycle and respiratory electron transport	720009865	P21912, P31930, P08559, P42704, P10515, Q12931, P31040, P47985, P11177, P21796, P06576	11	69	178	10946	14.1026	9.80345	1.24203e-08	1.29211e-07	7.20969e-05	3.20444e-06	7.20995e-05	0.00692569	2.57959e-05
Reactome_NSP2 WT	DAVID Reactome	R-HSA-446203~Asparagine N-linked glycosylation	720010831	Q13885, Q9H0U4, Q9Y678, Q14697, P18085, Q14789, P04350, Q01082, O75352, P30101, Q14165	11	69	304	10946	14.1026	5.74018	2.74755e-06	1.64362e-05	0.00912953	0.000708618	0.00405499	0.389512	0.00328133
Reactome_NSP2 WT	DAVID Reactome	R-HSA-71406~Pyruvate metabolism and Citric Acid (TCA) cycle	720011471	P21912, P08559, P10515, P31040, P11177, P21796	6	69	55	10946	7.69231	17.3059	1.14325e-06	2.1801e-05	0.0120914	0.00412089	0.00405499	0.389512	0.00435236
Reactome_NSP2 WT	DAVID Reactome	R-HSA-6807878~COPI-mediated anterograde transport	720011388	Q13885, Q9H0U4, Q9Y678, P18085, Q14789, P04350, Q01082	7	69	101	10946	8.97436	10.9947	3.11903e-06	3.66315e-05	0.0202332	0.00160813	0.00511009	0.490862	0.00731306
Reactome_NSP2 WT	DAVID Reactome	R-HSA-1643685~Disease	720009979	P04899, P04439, Q14789, Q8TEM1, Q12849, P12235, P63261, Q99961, P61088, Q00610, P62714, P02545, O94905, Q13885, Q14697, P49411, Q01082, P19367, O00410, O75352, P20700, P49589, P04350, P05166, P46778	25	69	1748	10946	32.0513	2.26885	3.24025e-05	7.53856e-05	0.0411942	0.00832513	0.00702821	0.675111	0.0150496
Reactome_NSP2 WT	DAVID Reactome	R-HSA-70171~Glycolysis	720011450	P17858, P04406, Q8TEM1, P62714, P19367, Q01813	6	69	71	10946	7.69231	13.406	5.21874e-06	7.55721e-05	0.041294	0.00537128	0.00702821	0.675111	0.0150868
Reactome_NSP2 WT	DAVID Reactome	R-HSA-163200~Respiratory electron transport, ATP synthesis by chemiosmotic coupling, and heat production by uncoupling proteins.	720009961	P21912, P31930, P42704, Q12931, P31040, P47985, P06576	7	69	127	10946	8.97436	8.74381	1.42399e-05	0.0001317	0.0708576	0.00366717	0.0104983	1.00844	0.0262911
Reactome_NSP2 WT	DAVID Reactome	R-HSA-5653656~Vesicle-mediated transport	720011168	Q13885, Q9Y678, Q9NP72, P18085, Q14789, Q01082, P51148, Q9Y4L1, P62330, Q9H0U4, P63261, Q99961, Q00610, P04350	14	69	673	10946	17.9487	3.30004	6.33149e-05	0.000216254	0.113685	0.0162031	0.0150837	1.4489	0.0431689
Reactome_NSP2 WT	DAVID Reactome	R-HSA-70326~Glucose metabolism	720011454	P17858, P04406, Q8TEM1, P62714, P19367, Q01813	6	69	91	10946	7.69231	10.4596	2.20048e-05	0.000245289	0.127932	0.0334902	0.0152079	1.46083	0.0489641
Reactome_NSP2 WT	DAVID Reactome	R-HSA-199977~ER to Golgi Anterograde Transport	720010271	Q13885, Q9H0U4, Q9Y678, P18085, Q14789, P04350, Q01082	7	69	154	10946	8.97436	7.2108	4.94603e-05	0.000375196	0.188928	0.0375597	0.0209359	2.01105	0.0748909
Reactome_NSP2 WT	DAVID Reactome	R-HSA-611105~Respiratory electron transport	720011314	P21912, P31930, P42704, Q12931, P31040, P47985	6	69	103	10946	7.69231	9.24103	4.44881e-05	0.000435999	0.215995	0.0448747	0.0212875	2.04482	0.0870248
Reactome_NSP2 WT	DAVID Reactome	R-HSA-199991~Membrane Trafficking	720010272	Q13885, Q9Y678, Q9NP72, P18085, Q14789, Q01082, P51148, P62330, Q9H0U4, P63261, Q99961, Q00610, P04350	13	69	634	10946	16.6667	3.25282	0.000139455	0.000470352	0.230887	0.0353422	0.0212875	2.04482	0.09388
Reactome_NSP2 WT	DAVID Reactome	R-HSA-392499~Metabolism of proteins	720010689	O43852, P04439, P18085, Q14789, Q8TEM1, P51148, P30101, Q9H0U4, Q15084, P61088, P41250, P43897, Q13885, Q14697, Q9Y678, P49411, Q9NP72, Q86VP6, Q01082, O75352, P49589, P04350, P21796, P46778, Q14165	25	69	1970	10946	32.0513	2.01317	0.000239702	0.000495945	0.241798	0.0599766	0.0212875	2.04482	0.098987
Reactome_NSP2 WT	DAVID Reactome	R-HSA-1430728~Metabolism	720009866	P31930, P08559, P04899, P10515, Q8TEM1, O00763, Q00796, P42704, P31040, P62714, P04406, Q12931, P19367, P11177, Q9Y617, P21912, P17858, P47985, Q01813, Q13232, P05166, P49748, P21796, P46778, Q99714, P06576	26	69	2118	10946	33.3333	1.94739	0.000291556	0.000583324	0.277899	0.0724721	0.0232496	2.2333	0.116422
Reactome_NSP2 WT	DAVID Reactome	R-HSA-70268~Pyruvate metabolism	720011453	P08559, P10515, P11177, P21796	4	69	31	10946	5.12821	20.4694	4.00178e-05	0.00091009	0.398339	0.243286	0.0322569	3.09851	0.18161
Reactome_NSP2 WT	DAVID Reactome	R-HSA-597592~Post-translational protein modification	720011312	Q13885, Q9Y678, Q14697, O43852, Q9NP72, P04439, P18085, Q14789, Q8TEM1, Q86VP6, Q01082, P51148, P30101, O75352, Q9H0U4, Q15084, P61088, P04350, P21796, Q14165	20	69	1441	10946	25.641	2.20177	0.000406963	0.000924929	0.403305	0.0996914	0.0322569	3.09851	0.18457
Reactome_NSP2 WT	DAVID Reactome	R-HSA-948021~Transport to the Golgi and subsequent modification	720011903	Q13885, Q9H0U4, Q9Y678, P18085, Q14789, P04350, Q01082	7	69	185	10946	8.97436	6.00251	0.000156721	0.000986734	0.423552	0.114242	0.0323881	3.11111	0.196897
Reactome_NSP2 WT	DAVID Reactome	R-HSA-8856688~Golgi-to-ER retrograde transport	720011624	Q13885, Q9H0U4, Q9Y678, Q9NP72, P18085, P04350	6	69	133	10946	7.69231	7.15659	0.000183999	0.00138722	0.539115	0.0463668	0.0430039	4.13084	0.276757
Reactome_NSP3 A890D	DAVID Reactome	R-HSA-72312~rRNA processing	720011482	Q9Y3U8, Q7L0Y3, P62917, P50914, P62910, P40429, P83731, Q99848, P62753, P56182, Q9UNQ2, P46087, P26373, Q8IY37, P62266, Q9NW13, Q02543, P62701, P62841, P46776, Q9NXF1, P27635, P46779, P46778, Q99714	25	147	205	10946	12.3153	9.0808	2.13072e-17	2.16219e-16	1.28342e-13	2.86438e-14	1.24974e-13	1.13515e-11	4.44089e-14
Reactome_NSP3 A890D	DAVID Reactome	R-HSA-8868773~rRNA processing in the nucleus and cytosol	720011644	Q9Y3U8, Q9UNQ2, P46087, P26373, P62917, Q8IY37, P62266, Q9NW13, P50914, Q02543, P40429, P62701, P62910, P83731, P62841, Q9NXF1, P46776, P62753, P27635, P56182, Q99848, P46779, P46778	23	147	195	10946	11.33	8.78277	1.06348e-15	1.01914e-14	5.90372e-12	2.86438e-13	2.94532e-12	2.67525e-10	2.04281e-12
Reactome_NSP3 A890D	DAVID Reactome	R-HSA-72766~Translation	720011493	Q9Y3U8, Q9NP81, P62917, Q12904, Q9BW92, P50914, Q6PI48, Q15181, P62910, P40429, P83731, P62753, P82914, P04843, P49411, P26373, O76094, P62266, Q02543, P62701, P62841, P46776, P27635, P46779, P56192, P46778	26	147	292	10946	12.8079	6.63023	1.16721e-14	8.37442e-14	4.83849e-11	3.00759e-12	1.59922e-11	1.45258e-09	1.67089e-11
Reactome_NSP3 A890D	DAVID Reactome	R-HSA-1799339~SRP-dependent cotranslational protein targeting to membrane	720010133	Q9Y3U8, P04843, P26373, P62917, O76094, P62266, P50914, Q02543, P40429, P62701, P62910, P83731, P62841, P46776, P62753, P27635, P46779, P46778	18	147	113	10946	8.867	11.8613	7.96232e-15	1.10673e-13	6.39784e-11	1.64988e-11	1.59922e-11	1.45258e-09	2.21045e-11
Reactome_NSP3 A890D	DAVID Reactome	R-HSA-168255~Influenza Infection	720010045	Q9Y3U8, P26373, P62917, Q8N1F7, P62266, P50914, Q02543, P40429, P62701, P62910, Q5SRE5, P83731, P27824, P62841, P46776, P62753, P27635, P27797, P46779, P46778	20	147	157	10946	9.85222	9.48568	1.99145e-14	2.12925e-13	1.2308e-10	1.02545e-11	2.46141e-11	2.23571e-09	4.25104e-11
Reactome_NSP3 A890D	DAVID Reactome	R-HSA-2408522~Selenoamino acid metabolism	720010424	Q9Y3U8, P26373, P62917, Q12904, P62266, P50914, Q02543, P40429, P62701, P62910, P83731, P62841, P46776, P62753, P27635, P56192, P46779, P46778	18	147	119	10946	8.867	11.2632	2.04899e-14	2.66479e-13	1.5401e-10	1.58973e-11	2.56708e-11	2.33169e-09	5.32019e-11
Reactome_NSP3 A890D	DAVID Reactome	R-HSA-6791226~Major pathway of rRNA processing in the nucleolus and cytosol	720011341	Q9Y3U8, P26373, P62917, Q8IY37, P62266, Q9NW13, P50914, Q02543, P40429, P62701, P62910, P83731, P62841, Q9NXF1, P46776, P62753, P27635, P56182, Q99848, P46779, P46778	21	147	185	10946	10.3448	8.45251	4.40363e-14	4.13736e-13	2.39165e-10	3.41147e-11	3.41628e-11	3.10302e-09	8.26117e-11
Reactome_NSP3 A890D	DAVID Reactome	R-HSA-192823~Viral mRNA Translation	720010210	Q9Y3U8, P26373, P62917, P62266, P50914, Q02543, P40429, P62701, P62910, P83731, P62841, P46776, P62753, P27635, P46779, P46778	16	147	90	10946	7.88177	13.2378	4.48927e-14	7.07383e-13	4.08897e-10	8.10045e-11	4.54297e-11	4.1264e-09	1.41243e-10
Reactome_NSP3 A890D	DAVID Reactome	R-HSA-156902~Peptide chain elongation	720009921	Q9Y3U8, P26373, P62917, P62266, P50914, Q02543, P40429, P62701, P62910, P83731, P62841, P46776, P62753, P27635, P46779, P46778	16	147	90	10946	7.88177	13.2378	4.48927e-14	7.07383e-13	4.08897e-10	8.10045e-11	4.54297e-11	4.1264e-09	1.41243e-10
Reactome_NSP3 A890D	DAVID Reactome	R-HSA-156842~Eukaryotic Translation Elongation	720009920	Q9Y3U8, P26373, P62917, P62266, P50914, Q02543, P40429, P62701, P62910, P83731, P62841, P46776, P62753, P27635, P46779, P46778	16	147	94	10946	7.88177	12.6745	9.17834e-14	1.37211e-12	7.93088e-10	1.89507e-10	6.60901e-11	6.00299e-09	2.73948e-10
Reactome_NSP3 A890D	DAVID Reactome	R-HSA-72764~Eukaryotic Translation Termination	720011492	Q9Y3U8, P26373, P62917, P62266, P50914, Q02543, P40429, P62701, P62910, P83731, P62841, P46776, P62753, P27635, P46779, P46778	16	147	94	10946	7.88177	12.6745	9.17834e-14	1.37211e-12	7.93088e-10	1.89507e-10	6.60901e-11	6.00299e-09	2.73948e-10
Reactome_NSP3 A890D	DAVID Reactome	R-HSA-2408557~Selenocysteine synthesis	720010427	Q9Y3U8, P26373, P62917, P62266, P50914, Q02543, P40429, P62701, P62910, P83731, P62841, P46776, P62753, P27635, P46779, P46778	16	147	94	10946	7.88177	12.6745	9.17834e-14	1.37211e-12	7.93088e-10	1.89507e-10	6.60901e-11	6.00299e-09	2.73948e-10
Reactome_NSP3 A890D	DAVID Reactome	R-HSA-975956~Nonsense Mediated Decay (NMD) independent of the Exon Junction Complex (EJC)	720012258	Q9Y3U8, P26373, P62917, P62266, P50914, Q02543, P40429, P62701, P62910, P83731, P62841, P46776, P62753, P27635, P46779, P46778	16	147	96	10946	7.88177	12.4104	1.29514e-13	1.88786e-12	1.09116e-09	1.67136e-10	8.39372e-11	7.62405e-09	3.7691e-10
Reactome_NSP3 A890D	DAVID Reactome	R-HSA-168273~Influenza Viral RNA Transcription and Replication	720010050	Q9Y3U8, P26373, P62917, Q8N1F7, P62266, P50914, Q02543, P40429, P62701, P62910, Q5SRE5, P83731, P62841, P46776, P62753, P27635, P46779, P46778	18	147	136	10946	8.867	9.85534	2.23e-13	2.49086e-12	1.43974e-09	1.72636e-10	1.02837e-10	9.34073e-09	4.97324e-10
Reactome_NSP3 A890D	DAVID Reactome	R-HSA-9633012~Response of EIF2AK4 (GCN2) to amino acid deficiency	720011951	Q9Y3U8, P26373, P62917, P62266, P50914, Q02543, P40429, P62701, P62910, P83731, P62841, P46776, P62753, P27635, P46779, P46778	16	147	102	10946	7.88177	11.6804	3.46366e-13	4.70292e-12	2.71828e-09	3.57474e-10	1.69893e-10	1.54315e-08	9.3896e-10
Reactome_NSP3 A890D	DAVID Reactome	R-HSA-72689~Formation of a pool of free 40S subunits	720011486	Q9Y3U8, P26373, P62917, P62266, P50914, Q02543, P40429, P62701, P62910, P83731, P62841, P46776, P62753, P27635, P46779, P46778	16	147	102	10946	7.88177	11.6804	3.46366e-13	4.70292e-12	2.71828e-09	3.57474e-10	1.69893e-10	1.54315e-08	9.3896e-10
Reactome_NSP3 A890D	DAVID Reactome	R-HSA-156827~L13a-mediated translational silencing of Ceruloplasmin expression	720009919	Q9Y3U8, P26373, P62917, P62266, P50914, Q02543, P40429, P62701, P62910, P83731, P62841, P46776, P62753, P27635, P46779, P46778	16	147	112	10946	7.88177	10.6375	1.55072e-12	1.88945e-11	1.09211e-08	1.60038e-09	6.42414e-10	5.83508e-08	3.77238e-09
Reactome_NSP3 A890D	DAVID Reactome	R-HSA-72706~GTP hydrolysis and joining of the 60S ribosomal subunit	720011489	Q9Y3U8, P26373, P62917, P62266, P50914, Q02543, P40429, P62701, P62910, P83731, P62841, P46776, P62753, P27635, P46779, P46778	16	147	113	10946	7.88177	10.5434	1.78612e-12	2.15409e-11	1.24506e-08	3.68657e-09	6.91701e-10	6.28275e-08	4.30074e-09
Reactome_NSP3 A890D	DAVID Reactome	R-HSA-975957~Nonsense Mediated Decay (NMD) enhanced by the Exon Junction Complex (EJC)	720012259	Q9Y3U8, P26373, P62917, P62266, P50914, Q02543, P40429, P62701, P62910, P83731, P62841, P46776, P62753, P27635, P46779, P46778	16	147	116	10946	7.88177	10.2707	2.70549e-12	3.16658e-11	1.83028e-08	3.4901e-09	9.15142e-10	8.31227e-08	6.32222e-09
Reactome_NSP3 A890D	DAVID Reactome	R-HSA-927802~Nonsense-Mediated Decay (NMD)	720011890	Q9Y3U8, P26373, P62917, P62266, P50914, Q02543, P40429, P62701, P62910, P83731, P62841, P46776, P62753, P27635, P46779, P46778	16	147	116	10946	7.88177	10.2707	2.70549e-12	3.16658e-11	1.83028e-08	3.4901e-09	9.15142e-10	8.31227e-08	6.32222e-09
Reactome_NSP3 A890D	DAVID Reactome	R-HSA-72613~Eukaryotic Translation Initiation	720011483	Q9Y3U8, P26373, P62917, P62266, P50914, Q02543, P40429, P62701, P62910, P83731, P62841, P46776, P62753, P27635, P46779, P46778	16	147	120	10946	7.88177	9.92834	4.61809e-12	5.20021e-11	3.00572e-08	3.5744e-09	1.36624e-09	1.24096e-07	1.03825e-08
Reactome_NSP3 A890D	DAVID Reactome	R-HSA-72737~Cap-dependent Translation Initiation	720011491	Q9Y3U8, P26373, P62917, P62266, P50914, Q02543, P40429, P62701, P62910, P83731, P62841, P46776, P62753, P27635, P46779, P46778	16	147	120	10946	7.88177	9.92834	4.61809e-12	5.20021e-11	3.00572e-08	3.5744e-09	1.36624e-09	1.24096e-07	1.03825e-08
Reactome_NSP3 A890D	DAVID Reactome	R-HSA-1430728~Metabolism	720009866	P53004, Q9Y3U8, O75947, O75306, A0FGR8, P40926, P62917, O95470, Q12904, P32189, O43678, Q8IV08, P53007, P42704, Q15181, P62910, Q9UJS0, P22695, P83731, P62753, Q14573, P61106, P48047, Q9UI09, P04406, O00154, Q16718, P16152, P46776, P62841, P27635, P46779, P46778, Q99714, O00763, P42126, P20339, O00170, P50914, P40429, P54886, Q9NXE4, Q9NVE7, P26373, Q12931, Q8N1F7, O95182, P36873, P19367, P62266,…	61	147	2118	10946	30.0493	2.14458	4.36448e-10	9.57929e-10	5.53683e-07	1.12603e-07	2.40732e-08	2.18658e-06	1.91255e-07
Reactome_NSP3 A890D	DAVID Reactome	R-HSA-9711097~Cellular response to starvation	720012189	Q9Y3U8, P26373, P62917, P62266, P50914, Q02543, P40429, P62701, P62910, P83731, P62841, P46776, P62753, P27635, P46779, P46778	16	147	157	10946	7.88177	7.58854	2.88393e-10	2.40367e-09	1.38932e-06	1.48811e-07	5.78885e-08	5.25804e-06	4.79904e-07
Reactome_NSP3 A890D	DAVID Reactome	R-HSA-9010553~Regulation of expression of SLITs and ROBOs	720011775	Q9Y3U8, P26373, P62917, P62266, P50914, Q02543, P40429, P62701, P62910, P83731, P62841, P46776, P62753, P27635, P46779, P46778	16	147	172	10946	7.88177	6.92675	1.12241e-09	8.4767e-09	4.89952e-06	2.89581e-07	1.95981e-07	1.78011e-05	1.69241e-06
Reactome_NSP3 A890D	DAVID Reactome	R-HSA-8873719~RAB geranylgeranylation	720011646	Q9UL25, P20339, Q9H0U4, Q8WUD1, Q9NP72, P20340, P51148, P62820, P61019, P61106, P51149	11	147	65	10946	5.41872	12.6014	8.45871e-10	1.25117e-08	7.23171e-06	1.30941e-06	2.78144e-07	2.52639e-05	2.49801e-06
Reactome_NSP3 A890D	DAVID Reactome	R-HSA-376176~Signaling by ROBO receptors	720010607	Q9Y3U8, P26373, P62917, P62266, P50914, Q02543, P40429, P62701, P62910, P83731, P61586, P62841, P46776, P62753, P27635, P46779, P46778	17	147	219	10946	8.37438	5.7802	5.35164e-09	3.32561e-08	1.92219e-05	1.38072e-06	7.11927e-07	6.46647e-05	6.63974e-06
Reactome_NSP3 A890D	DAVID Reactome	R-HSA-392499~Metabolism of proteins	720010689	Q9Y3U8, P04439, P18085, P62917, Q12904, P51148, P51149, Q9H0U4, Q6PI48, Q15181, P62910, P83731, P61586, P27824, P62753, Q14694, P61106, Q07065, Q9UL25, P82914, Q14697, P04843, Q8WUD1, P49411, Q9NP72, Q01082, P46776, P62841, P27635, P46779, P27797, P46778, Q9NP81, O94966, P78527, Q9BW92, P30101, P20339, Q15084, P50914, P40429, P26373, Q8N1F7, P68371, O75352, O75396, O76094, P62266, Q02543, P62701,…	55	147	1970	10946	27.0936	2.0789	1.6902e-08	3.59959e-08	2.08054e-05	4.36072e-06	7.43059e-07	6.74924e-05	7.18675e-06
Reactome_NSP3 A890D	DAVID Reactome	R-HSA-5663205~Infectious disease	720011233	Q9Y3U8, P04439, P62917, P12235, P51149, P20339, P50914, P62910, P40429, P83731, P27824, P62753, Q14573, Q14697, P04843, P49411, P26373, Q8N1F7, P68371, P10321, Q02790, P62266, Q02543, P00558, P62701, Q5SRE5, P05141, P05023, P62841, P46776, P27635, P08238, P46779, P27797, P46778	35	147	960	10946	17.2414	2.71478	3.15791e-08	8.87226e-08	5.12803e-05	8.14738e-06	1.76833e-06	0.000160618	1.77139e-05
Reactome_NSP3 A890D	DAVID Reactome	R-HSA-71291~Metabolism of amino acids and derivatives	720011466	P54886, Q9Y3U8, P26373, P62917, Q12904, P62266, P50914, Q02543, P40429, P62701, P62910, Q9UJS0, P83731, P62841, P46776, P62753, P27635, P56192, P46779, P46778, Q99714	21	147	376	10946	10.3448	4.15881	2.78074e-08	1.21944e-07	7.04813e-05	7.17427e-06	2.34946e-06	0.000213402	2.43467e-05
Reactome_NSP3 A890D	DAVID Reactome	R-HSA-8876198~RAB GEFs exchange GTP for GDP on RABs	720011655	Q9UL25, P50395, P20339, Q9H0U4, Q9NP72, Q9UJ41, P20340, P51148, P62820, P61106, P51149	11	147	90	10946	5.41872	9.10098	2.95195e-08	3.01007e-07	0.000173967	5.33107e-05	5.61232e-06	0.000509769	6.00973e-05
Reactome_NSP3 A890D	DAVID Reactome	R-HSA-8953854~Metabolism of RNA	720011712	Q9Y3U8, Q7L0Y3, P62917, Q9Y606, P50914, P62910, P40429, P83731, Q99848, P62753, P56182, Q9UNQ2, P46087, P26373, Q8N1F7, Q8IY37, P62266, Q9NW13, Q02543, P62701, Q5SRE5, P62841, P46776, Q9NXF1, P27635, P46779, P46778, Q99714	28	147	716	10946	13.7931	2.91194	2.42641e-07	7.34472e-07	0.000424435	6.25994e-05	1.32664e-05	0.00120499	0.000146641
Reactome_NSP3 A890D	DAVID Reactome	R-HSA-9007101~Rab regulation of trafficking	720011769	P62330, Q9UL25, P50395, P20339, Q9H0U4, Q9NP72, Q9UJ41, P20340, P51148, P62820, P61106, P51149	12	147	124	10946	5.91133	7.20606	9.62139e-08	7.59017e-07	0.000438616	7.44668e-05	1.32943e-05	0.00120753	0.000151541
Reactome_NSP3 A890D	DAVID Reactome	R-HSA-70326~Glucose metabolism	720011454	P17858, P04406, P00558, P40926, Q9UJS0, Q5SRE5, P04075, Q8N1F7, P19367, P53007	10	147	91	10946	4.92611	8.1827	3.56333e-07	3.22956e-06	0.00186495	0.000551451	5.49024e-05	0.00498681	0.000644795
Reactome_NSP3 A890D	DAVID Reactome	R-HSA-2262752~Cellular responses to stress	720010418	P53004, Q9Y3U8, P62917, Q15084, P50914, P42704, P62910, P40429, P83731, P62753, P31948, P26373, Q8N1F7, P68371, Q9Y4L1, Q02790, P62266, Q02543, P62701, Q5SRE5, P62841, P46776, P27635, P08238, P46779, P27797, P46778, Q99615	28	147	789	10946	13.7931	2.64253	1.71311e-06	4.6985e-06	0.00271205	0.000441886	7.75923e-05	0.00704775	0.000938074
Reactome_NSP3 A890D	DAVID Reactome	R-HSA-8953897~Cellular responses to stimuli	720011713	P53004, Q9Y3U8, P62917, Q15084, P50914, P42704, P62910, P40429, P83731, P62753, P31948, P26373, Q8N1F7, P68371, Q9Y4L1, Q02790, P62266, Q02543, P62701, Q5SRE5, P62841, P46776, P27635, P08238, P46779, P27797, P46778, Q99615	28	147	803	10946	13.7931	2.59645	2.41761e-06	6.51378e-06	0.0037579	0.00062355	0.000104582	0.00949926	0.0013005
Reactome_NSP3 A890D	DAVID Reactome	R-HSA-163200~Respiratory electron transport, ATP synthesis by chemiosmotic coupling, and heat production by uncoupling proteins.	720009961	O75947, O75306, P42704, P48047, Q9UI09, Q12931, P22695, O43678, O95182, Q16718, P06576	11	147	127	10946	5.41872	6.44952	1.03272e-06	7.23128e-06	0.00417097	0.000266407	0.000112964	0.0102606	0.00144375
Reactome_NSP3 A890D	DAVID Reactome	R-HSA-1643685~Disease	720009979	Q9Y3U8, P04439, P62917, P78549, P12235, P51149, P20339, P50914, P62910, P40429, P83731, P27824, P62753, Q14573, Q14697, P04843, P49411, P26373, Q8N1F7, P36873, Q01082, P19367, P68371, P51114, O75352, P10321, Q02790, P84095, P62266, Q02543, P00558, P62701, Q5SRE5, P05141, Q16543, P05023, P05166, P62841, P46776, P27635, P08238, P46779, Q9P2E9, P27797, P46778	45	147	1748	10946	22.1675	1.91694	6.01617e-06	1.18495e-05	0.00682567	0.00155097	0.000180238	0.0163711	0.0023658
Reactome_NSP3 A890D	DAVID Reactome	R-HSA-1428517~The citric acid (TCA) cycle and respiratory electron transport	720009865	O75947, O75306, P42704, P48047, P40926, Q9UI09, Q12931, P22695, O43678, O95182, Q16718, P06576	12	147	178	10946	5.91133	5.01995	4.70074e-06	2.52333e-05	0.0144792	0.00121206	0.000373971	0.0339679	0.00503789
Reactome_NSP3 A890D	DAVID Reactome	R-HSA-70263~Gluconeogenesis	720011452	P04406, P00558, P40926, Q9UJS0, P04075, P53007	6	147	34	10946	2.95567	13.1405	5.22376e-06	8.03045e-05	0.0453571	0.022651	0.0011604	0.1054	0.0160325
Reactome_NSP3 A890D	DAVID Reactome	R-HSA-422475~Axon guidance	720010756	Q9Y3U8, P26373, P62917, Q01082, P68371, P62266, P50914, Q02543, P40429, P62701, P62910, P83731, P61586, P62841, P46776, P62753, P27635, P08238, P46779, P46778	20	147	553	10946	9.85222	2.69304	4.81335e-05	0.000135405	0.0752849	0.0123419	0.00190888	0.173385	0.0270325
Reactome_NSP3 A890D	DAVID Reactome	R-HSA-379724~tRNA Aminoacylation	720010617	Q9NP81, Q6PI48, Q15181, Q12904, Q9BW92, P56192	6	147	42	10946	2.95567	10.6375	1.86511e-05	0.000225342	0.122135	0.0651493	0.00310113	0.281677	0.0449854
Reactome_NSP3 A890D	DAVID Reactome	R-HSA-9675108~Nervous system development	720012086	Q9Y3U8, P26373, P62917, Q01082, P68371, P62266, P50914, Q02543, P40429, P62701, P62910, P83731, P61586, P62841, P46776, P62753, P27635, P08238, P46779, P46778	20	147	578	10946	9.85222	2.57656	8.88721e-05	0.000239172	0.129126	0.0226691	0.00321491	0.292012	0.047746
Reactome_NSP3 A890D	DAVID Reactome	R-HSA-8854214~TBC/RABGAPs	720011620	P62330, P20339, Q9UJ41, P20340, P51148, P51149	6	147	46	10946	2.95567	9.71251	3.18645e-05	0.000347907	0.18219	0.0243619	0.00457023	0.415116	0.0694492
Reactome_NSP3 A890D	DAVID Reactome	R-HSA-70171~Glycolysis	720011450	P17858, P04406, P00558, Q5SRE5, P04075, Q8N1F7, P19367	7	147	71	10946	3.44828	7.34138	4.42747e-05	0.000356675	0.186326	0.0446644	0.0045813	0.416121	0.0711992
Reactome_NSP3 A890D	DAVID Reactome	R-HSA-611105~Respiratory electron transport	720011314	O75306, P42704, Q9UI09, Q12931, P22695, O43678, O95182, Q16718	8	147	103	10946	3.94089	5.7835	7.08679e-05	0.000442976	0.225933	0.0705276	0.00556608	0.50557	0.0884226
Reactome_NSP3 A890D	DAVID Reactome	R-HSA-983170~Antigen Presentation: Folding, assembly and peptide loading of class I MHC	720012287	P04439, P27824, P30101, P27797, P10321	5	147	29	10946	2.46305	12.8384	3.73661e-05	0.000556561	0.275144	0.206558	0.00684452	0.62169	0.111089
Reactome_NSP3 A890D	DAVID Reactome	R-HSA-5653656~Vesicle-mediated transport	720011168	Q9UL25, P50395, Q12756, Q9NP72, P18085, Q86YS7, O00186, Q01082, P51148, P68371, O75396, Q9Y4L1, P51149, P62330, P20339, Q9H0U4, Q9UJ41, P20340, P62820, P27797, P61106	21	147	673	10946	10.3448	2.3235	0.000247986	0.00060141	0.293703	0.061984	0.00724198	0.657792	0.120038
Reactome_NSP3 A890D	DAVID Reactome	R-HSA-9694516~SARS-CoV-2 Infection	720012126	P04843, Q14697, P49411, P04439, Q8N1F7, P10321, P62266, P62701, Q5SRE5, P27824, P62841, P62753, P08238	13	147	299	10946	6.40394	3.2375	0.00019064	0.000651358	0.313815	0.0936951	0.00768336	0.697883	0.130004
Reactome_NSP3 A890D	DAVID Reactome	R-HSA-6798695~Neutrophil degranulation	720011351	P50395, Q07065, Q9NP72, P04439, P51148, P68371, O75165, P10321, P51149, P84095, Q96BM9, P17858, P04075, P61586, P20340, P08238, P61106	17	147	482	10946	8.37438	2.62627	0.000249426	0.000686769	0.327726	0.0623325	0.00793905	0.721107	0.13707
Reactome_NSP3 A890D	DAVID Reactome	R-HSA-9679506~SARS-CoV Infections	720012097	P04843, Q14697, P49411, P04439, Q8N1F7, P10321, Q02790, P62266, P62701, Q5SRE5, P27824, P05023, P62841, P62753, P08238	15	147	414	10946	7.38916	2.69792	0.000442637	0.00125576	0.516296	0.107943	0.0142319	1.29269	0.25056
Reactome_NSP3 A890D	DAVID Reactome	R-HSA-9705683~SARS-CoV-2-host interactions	720012173	P62266, P49411, P04439, P62701, Q5SRE5, Q8N1F7, P62841, P62753, P08238, P10321	10	147	203	10946	4.92611	3.66811	0.000403819	0.00157387	0.597642	0.0989607	0.0174941	1.589	0.313983
Reactome_NSP3 A890D	DAVID Reactome	R-HSA-199991~Membrane Trafficking	720010272	Q9UL25, P50395, Q12756, Q9NP72, P18085, Q86YS7, O00186, Q01082, P51148, P68371, O75396, P51149, P62330, P20339, Q9H0U4, Q9UJ41, P20340, P62820, P61106	19	147	634	10946	9.35961	2.23153	0.000817593	0.00191044	0.668886	0.190246	0.0208347	1.89242	0.381066
Reactome_NSP3 A890D	DAVID Reactome	R-HSA-8856688~Golgi-to-ER retrograde transport	720011624	Q9H0U4, Q12756, Q9NP72, P18085, P20340, O75396, P68371, P62820	8	147	133	10946	3.94089	4.47895	0.000416562	0.00199772	0.685205	0.101919	0.021383	1.94222	0.398456
Reactome_NSP3 A890D	DAVID Reactome	R-HSA-446203~Asparagine N-linked glycosylation	720010831	Q9H0U4, P04843, Q14697, P18085, P27824, Q01082, O75396, O75352, P30101, P68371, P62820, P27797	12	147	304	10946	5.91133	2.93931	0.00080074	0.00248817	0.763062	0.186715	0.0261484	2.37507	0.496159
Reactome_NSP3 A890D	DAVID Reactome	R-HSA-9012999~RHO GTPase cycle	720011779	Q07065, O75955, Q15758, P31948, Q01082, Q9NSV4, Q16718, P51149, P84095, Q96DH6, Q8TBC3, Q16543, P61586, P08238, Q92974	15	147	449	10946	7.38916	2.48761	0.00102036	0.00267122	0.786908	0.231557	0.0275708	2.50427	0.532612
Reactome_NSP3 A890D	DAVID Reactome	R-HSA-901042~Calnexin/calreticulin cycle	720011774	Q14697, P27824, P30101, P27797	4	147	26	10946	1.97044	11.4558	0.00037088	0.00482703	0.938994	0.762021	0.0489478	4.44595	0.96142
Reactome_NSP3 K977Q	DAVID Reactome	R-HSA-168255~Influenza Infection	720010045	Q9Y3U8, P62917, Q9BTX1, P12236, Q12849, P18124, P50914, P39023, Q00610, P62910, P40429, P27824, P62753, Q9NRG9, P26373, P36578, O75694, O00410, P42677, P62266, P15880, Q02543, P62241, P62847, P62841, P46776, P27635, P27797, P46778	29	190	157	10946	11.2403	10.6414	4.88771e-22	6.22087e-21	4.12444e-18	2.52206e-19	4.12444e-18	3.70142e-16	1.2423e-18
Reactome_NSP3 K977Q	DAVID Reactome	R-HSA-1799339~SRP-dependent cotranslational protein targeting to membrane	720010133	Q9Y3U8, P62917, P18124, P39656, P50914, P39023, P62910, P40429, P62753, P61619, P26373, P36578, Q15629, P42677, O76094, P62266, P43307, P15880, Q02543, P62241, P62847, P62841, P46776, P27635, P46778	25	190	113	10946	9.68992	12.7457	3.86831e-21	6.15189e-20	4.07871e-17	7.98419e-18	2.03935e-17	1.83019e-15	1.22853e-17
Reactome_NSP3 K977Q	DAVID Reactome	R-HSA-168273~Influenza Viral RNA Transcription and Replication	720010050	Q9Y3U8, P62917, Q9BTX1, Q12849, P18124, P50914, P39023, P62910, P40429, P62753, Q9NRG9, P26373, P36578, O75694, O00410, P42677, P62266, P15880, Q02543, P62241, P62847, P62841, P46776, P27635, P46778	25	190	136	10946	9.68992	10.5902	4.68754e-19	5.92386e-18	3.92752e-15	3.62816e-16	1.30917e-15	1.1749e-13	1.18299e-15
Reactome_NSP3 K977Q	DAVID Reactome	R-HSA-192823~Viral mRNA Translation	720010210	Q9Y3U8, P26373, P62917, P36578, Q12849, P18124, P42677, P62266, P15880, P50914, Q02543, P39023, P62241, P40429, P62910, P62847, P62841, P46776, P62753, P27635, P46778	21	190	90	10946	8.13953	13.4425	2.00064e-18	3.39803e-17	2.25289e-14	3.61315e-15	5.63223e-15	5.05457e-13	6.78582e-15
Reactome_NSP3 K977Q	DAVID Reactome	R-HSA-156902~Peptide chain elongation	720009921	Q9Y3U8, P26373, P62917, P36578, P18124, P42677, P62266, P15880, P50914, Q02543, P39023, P62241, P40429, P62910, P62847, P62841, P46776, P62753, P27635, P46778	20	190	90	10946	7.75194	12.8023	3.77308e-17	6.01735e-16	3.68039e-13	5.72875e-14	7.97901e-14	7.16065e-12	1.11022e-13
Reactome_NSP3 K977Q	DAVID Reactome	R-HSA-156842~Eukaryotic Translation Elongation	720009920	Q9Y3U8, P26373, P62917, P36578, P18124, P42677, P62266, P15880, P50914, Q02543, P39023, P62241, P40429, P62910, P62847, P62841, P46776, P62753, P27635, P46778	20	190	94	10946	7.75194	12.2576	9.3879e-17	1.52836e-15	1.03051e-12	2.2915e-13	1.26663e-13	1.13672e-11	3.10862e-13
Reactome_NSP3 K977Q	DAVID Reactome	R-HSA-2408557~Selenocysteine synthesis	720010427	Q9Y3U8, P26373, P62917, P36578, P18124, P42677, P62266, P15880, P50914, Q02543, P39023, P62241, P40429, P62910, P62847, P62841, P46776, P62753, P27635, P46778	20	190	94	10946	7.75194	12.2576	9.3879e-17	1.52836e-15	1.03051e-12	2.2915e-13	1.26663e-13	1.13672e-11	3.10862e-13
Reactome_NSP3 K977Q	DAVID Reactome	R-HSA-72764~Eukaryotic Translation Termination	720011492	Q9Y3U8, P26373, P62917, P36578, P18124, P42677, P62266, P15880, P50914, Q02543, P39023, P62241, P40429, P62910, P62847, P62841, P46776, P62753, P27635, P46778	20	190	94	10946	7.75194	12.2576	9.3879e-17	1.52836e-15	1.03051e-12	2.2915e-13	1.26663e-13	1.13672e-11	3.10862e-13
Reactome_NSP3 K977Q	DAVID Reactome	R-HSA-72766~Translation	720011493	Q9Y3U8, P62917, P18124, P39656, Q9NWU5, P50914, P39023, P41250, P62910, P40429, P62753, Q14232, P43897, P61619, P82914, P26373, P36578, Q15629, P42677, O76094, P62266, P43307, P15880, Q02543, P62241, P62847, P62841, P46776, P27635, P56192, P46778	31	190	292	10946	12.0155	6.11619	2.68724e-16	2.02217e-15	1.32494e-12	5.72875e-14	1.48967e-13	1.33688e-11	3.9968e-13
Reactome_NSP3 K977Q	DAVID Reactome	R-HSA-975956~Nonsense Mediated Decay (NMD) independent of the Exon Junction Complex (EJC)	720012258	Q9Y3U8, P26373, P62917, P36578, P18124, P42677, P62266, P15880, P50914, Q02543, P39023, P62241, P40429, P62910, P62847, P62841, P46776, P62753, P27635, P46778	20	190	96	10946	7.75194	12.0022	1.45537e-16	2.2512e-15	1.47216e-12	1.43219e-13	1.49255e-13	1.33946e-11	4.44089e-13
Reactome_NSP3 K977Q	DAVID Reactome	R-HSA-8868773~rRNA processing in the nucleus and cytosol	720011644	Q9Y3U8, P62917, P18124, P50914, P39023, P62910, P40429, Q99848, P62753, Q9UNQ2, P46087, P26373, P36578, Q8IY37, P42677, P62266, Q9NW13, P15880, Q02543, P62241, P62847, P62841, P46776, Q9NXF1, P27635, P46778	26	190	195	10946	10.0775	7.6814	3.30864e-16	3.19798e-15	2.13463e-12	8.59313e-14	1.92751e-13	1.72982e-11	6.43929e-13
Reactome_NSP3 K977Q	DAVID Reactome	R-HSA-9633012~Response of EIF2AK4 (GCN2) to amino acid deficiency	720011951	Q9Y3U8, P26373, P62917, P36578, P18124, P42677, P62266, P15880, P50914, Q02543, P39023, P62241, P40429, P62910, P62847, P62841, P46776, P62753, P27635, P46778	20	190	102	10946	7.75194	11.2962	5.09057e-16	7.38882e-15	4.93172e-12	5.72875e-13	3.7683e-13	3.38181e-11	1.4877e-12
Reactome_NSP3 K977Q	DAVID Reactome	R-HSA-72689~Formation of a pool of free 40S subunits	720011486	Q9Y3U8, P26373, P62917, P36578, P18124, P42677, P62266, P15880, P50914, Q02543, P39023, P62241, P40429, P62910, P62847, P62841, P46776, P62753, P27635, P46778	20	190	102	10946	7.75194	11.2962	5.09057e-16	7.38882e-15	4.93172e-12	5.72875e-13	3.7683e-13	3.38181e-11	1.4877e-12
Reactome_NSP3 K977Q	DAVID Reactome	R-HSA-72312~rRNA processing	720011482	Q9Y3U8, P62917, P18124, P50914, P39023, P62910, P40429, Q99848, P62753, Q9UNQ2, P46087, P26373, P36578, Q8IY37, P42677, P62266, Q9NW13, P15880, Q02543, P62241, P62847, P62841, P46776, Q9NXF1, P27635, P46778	26	190	205	10946	10.0775	7.3067	1.24916e-15	1.04177e-14	6.91913e-12	9.45244e-13	4.93354e-13	4.42753e-11	2.08722e-12
Reactome_NSP3 K977Q	DAVID Reactome	R-HSA-2408522~Selenoamino acid metabolism	720010424	Q9Y3U8, P26373, P62917, P36578, P18124, P42677, P62266, P15880, P50914, Q02543, P39023, P62241, P40429, P62910, P62847, P62841, P46776, P62753, P27635, P56192, P46778	21	190	119	10946	8.13953	10.1666	9.75033e-16	1.12644e-14	7.43439e-12	7.73381e-13	4.97888e-13	4.46823e-11	2.24265e-12
Reactome_NSP3 K977Q	DAVID Reactome	R-HSA-72613~Eukaryotic Translation Initiation	720011483	Q9Y3U8, P26373, P62917, P36578, P18124, P42677, P62266, P15880, P50914, Q02543, P39023, P62241, P40429, P62910, P62847, P62841, P46776, P62753, P27635, Q14232, P46778	21	190	120	10946	8.13953	10.0818	1.14196e-15	1.32564e-14	8.75933e-12	8.59313e-13	5.16998e-13	4.63973e-11	2.64233e-12
Reactome_NSP3 K977Q	DAVID Reactome	R-HSA-72737~Cap-dependent Translation Initiation	720011491	Q9Y3U8, P26373, P62917, P36578, P18124, P42677, P62266, P15880, P50914, Q02543, P39023, P62241, P40429, P62910, P62847, P62841, P46776, P62753, P27635, Q14232, P46778	21	190	120	10946	8.13953	10.0818	1.14196e-15	1.32564e-14	8.75933e-12	8.59313e-13	5.16998e-13	4.63973e-11	2.64233e-12
Reactome_NSP3 K977Q	DAVID Reactome	R-HSA-156827~L13a-mediated translational silencing of Ceruloplasmin expression	720009919	Q9Y3U8, P26373, P62917, P36578, P18124, P42677, P62266, P15880, P50914, Q02543, P39023, P62241, P40429, P62910, P62847, P62841, P46776, P62753, P27635, P46778	20	190	112	10946	7.75194	10.2876	3.63326e-15	4.48637e-14	2.97375e-11	3.78098e-12	1.65248e-12	1.483e-10	8.9595e-12
Reactome_NSP3 K977Q	DAVID Reactome	R-HSA-72706~GTP hydrolysis and joining of the 60S ribosomal subunit	720011489	Q9Y3U8, P26373, P62917, P36578, P18124, P42677, P62266, P15880, P50914, Q02543, P39023, P62241, P40429, P62910, P62847, P62841, P46776, P62753, P27635, P46778	20	190	113	10946	7.75194	10.1966	4.41284e-15	5.31414e-14	3.52581e-11	9.166e-12	1.85435e-12	1.66416e-10	1.06248e-11
Reactome_NSP3 K977Q	DAVID Reactome	R-HSA-6791226~Major pathway of rRNA processing in the nucleolus and cytosol	720011341	Q9Y3U8, P26373, P62917, P36578, Q8IY37, P18124, P42677, P62266, P15880, Q9NW13, P50914, Q02543, P39023, P62241, P40429, P62910, P62847, P62841, Q9NXF1, P46776, P62753, P27635, Q99848, P46778	24	190	185	10946	9.30233	7.4738	1.01956e-14	8.63496e-14	5.72669e-11	7.90568e-12	2.62876e-12	2.35914e-10	1.72529e-11
Reactome_NSP3 K977Q	DAVID Reactome	R-HSA-975957~Nonsense Mediated Decay (NMD) enhanced by the Exon Junction Complex (EJC)	720012259	Q9Y3U8, P26373, P62917, P36578, P18124, P42677, P62266, P15880, P50914, Q02543, P39023, P62241, P40429, P62910, P62847, P62841, P46776, P62753, P27635, P46778	20	190	116	10946	7.75194	9.93285	7.45694e-15	8.72288e-14	5.78557e-11	9.59566e-12	2.62876e-12	2.35914e-10	1.74305e-11
Reactome_NSP3 K977Q	DAVID Reactome	R-HSA-927802~Nonsense-Mediated Decay (NMD)	720011890	Q9Y3U8, P26373, P62917, P36578, P18124, P42677, P62266, P15880, P50914, Q02543, P39023, P62241, P40429, P62910, P62847, P62841, P46776, P62753, P27635, P46778	20	190	116	10946	7.75194	9.93285	7.45694e-15	8.72288e-14	5.78557e-11	9.59566e-12	2.62876e-12	2.35914e-10	1.74305e-11
Reactome_NSP3 K977Q	DAVID Reactome	R-HSA-392499~Metabolism of proteins	720010689	Q9Y3U8, Q14204, O95714, P04439, P18085, P62917, O75147, P18124, P39656, P51148, P51149, Q8IXI2, Q9NWU5, P39023, P41250, P62910, P61026, P27824, P62753, Q9NRG9, Q07065, P82914, Q14697, Q9Y678, P49257, Q9NP72, Q15907, P36578, Q86VP6, O75694, Q15629, O60858, P43307, P62241, P62847, Q15477, P46776, P62841, P27635, P27797, P46977, P46778, Q8TEY7, O43852, Q9BTX1, P14735, Q13617, P78527, P30101, Q15084,…	78	190	1970	10946	30.2326	2.28103	6.15989e-14	1.44671e-13	9.59109e-11	1.58973e-11	4.17029e-12	3.74257e-10	2.8888e-11
Reactome_NSP3 K977Q	DAVID Reactome	R-HSA-9010553~Regulation of expression of SLITs and ROBOs	720011775	Q9Y3U8, Q8TEY7, P26373, P62917, P36578, Q13617, P18124, P42677, P62266, P15880, P50914, Q02543, P39023, P62241, P40429, P62910, P62847, P62841, P46776, P62753, P27635, P46778	22	190	172	10946	8.52713	7.36879	1.91048e-13	1.58799e-12	1.05281e-09	4.92959e-11	4.38682e-11	3.93689e-09	3.17113e-10
Reactome_NSP3 K977Q	DAVID Reactome	R-HSA-9711097~Cellular response to starvation	720012189	Q9Y3U8, Q16864, P26373, P62917, P36578, P18124, P42677, P62266, P15880, P50914, Q02543, P39023, P62241, P40429, P62910, P62847, P62841, P46776, P62753, P27635, P46778	21	190	157	10946	8.13953	7.70587	2.85208e-13	2.49009e-12	1.65095e-09	1.47172e-10	6.60371e-11	5.92641e-09	4.97269e-10
Reactome_NSP3 K977Q	DAVID Reactome	R-HSA-376176~Signaling by ROBO receptors	720010607	Q9Y3U8, Q8TEY7, P26373, P62917, P36578, Q13617, P18124, P42677, P62266, P15880, P50914, Q02543, P39023, P62241, P40429, P62910, P62847, P62841, P46776, P62753, P27635, P46778	22	190	219	10946	8.52713	5.78736	2.62454e-11	1.66412e-10	1.10331e-07	6.7713e-09	4.24349e-09	3.80826e-07	3.32322e-08
Reactome_NSP3 K977Q	DAVID Reactome	R-HSA-5663205~Infectious disease	720011233	Q9Y3U8, Q14204, P04899, P04439, P62917, Q9BTX1, P12236, Q12849, P18124, P39656, P51149, P63261, P50914, P39023, Q00610, P62910, P40429, P27824, P62753, Q9NRG9, Q14573, P05556, Q14697, P26373, P36578, O75694, O00410, P42677, P62266, P15880, Q02543, P54709, P00558, P62241, P78362, P04350, P62847, P05023, P62841, P46776, P27635, P27797, P46977, P46778	44	190	960	10946	17.0543	2.64048	1.37101e-09	3.76159e-09	2.49393e-06	3.5372e-07	9.2368e-08	8.28944e-06	7.51186e-07
Reactome_NSP3 K977Q	DAVID Reactome	R-HSA-2262752~Cellular responses to stress	720010418	Q9Y3U8, Q14204, Q16864, P62917, Q9BTX1, Q13617, P18124, Q15084, P50914, P42704, P39023, P62910, P40429, P62753, Q9NRG9, Q13501, P26373, P36578, O75694, Q9Y4L1, P42677, P62266, Q9NY33, P43307, P20700, P15880, Q02543, P62241, P30519, P04350, P62847, P62841, P46776, P49748, P27635, P27797, P46778, Q9NZJ5	38	190	789	10946	14.7287	2.77465	6.11681e-09	1.76931e-08	1.17304e-05	1.57814e-06	4.18947e-07	3.75978e-05	3.53329e-06
Reactome_NSP3 K977Q	DAVID Reactome	R-HSA-8953897~Cellular responses to stimuli	720011713	Q9Y3U8, Q14204, Q16864, P62917, Q9BTX1, Q13617, P18124, Q15084, P50914, P42704, P39023, P62910, P40429, P62753, Q9NRG9, Q13501, P26373, P36578, O75694, Q9Y4L1, P42677, P62266, Q9NY33, P43307, P20700, P15880, Q02543, P62241, P30519, P04350, P62847, P62841, P46776, P49748, P27635, P27797, P46778, Q9NZJ5	38	190	803	10946	14.7287	2.72628	9.89717e-09	2.81128e-08	1.86386e-05	2.55347e-06	6.42716e-07	5.76797e-05	5.61409e-06
Reactome_NSP3 K977Q	DAVID Reactome	R-HSA-9012999~RHO GTPase cycle	720011779	Q8N5G2, Q96NT0, O95210, P51149, P63261, Q86Y07, Q00610, O15498, Q99707, Q9NRG9, Q93008, Q92974, Q96CS3, O15173, Q07065, P05556, Q96HY6, P49257, Q07960, Q86UP2, Q9P0I2, Q96DH6, Q8TBC3, P20700, Q86XL3, P30519, Q8TAA9	27	190	449	10946	10.4651	3.46433	1.4787e-08	5.40748e-08	3.58509e-05	3.81505e-06	1.19505e-06	0.000107248	1.07987e-05
Reactome_NSP3 K977Q	DAVID Reactome	R-HSA-8980692~RHOA GTPase cycle	720011748	O15173, Q96CS3, Q96HY6, P49257, Q8N5G2, Q96NT0, O95210, Q07960, Q86UP2, Q9P0I2, Q8TAA9, P30519, O15498, Q9NRG9, Q92974	15	190	147	10946	5.81395	5.87863	3.58474e-08	2.31525e-07	0.000153489	9.24859e-06	4.95164e-06	0.000444378	4.62352e-05
Reactome_NSP3 K977Q	DAVID Reactome	R-HSA-9013408~RHOG GTPase cycle	720011788	O15173, P05556, P49257, Q86Y07, Q86XL3, Q8TAA9, O15498, O95210, Q07960, P51149, Q86UP2	11	190	74	10946	4.26357	8.56373	5.20488e-08	5.11671e-07	0.00033918	0.00012085	1.05448e-05	0.000946326	0.00010218
Reactome_NSP3 K977Q	DAVID Reactome	R-HSA-71291~Metabolism of amino acids and derivatives	720011466	Q9Y3U8, P26373, P62917, P36578, P18124, P42677, Q02218, P62266, P15880, P50914, Q02543, P39023, P62241, P40429, P62910, Q99707, P62847, P62841, P46776, P62753, P27635, P56192, P46778	23	190	376	10946	8.91473	3.52405	1.40734e-07	5.24853e-07	0.000347917	3.63086e-05	1.05448e-05	0.000946326	0.000104812
Reactome_NSP3 K977Q	DAVID Reactome	R-HSA-8953854~Metabolism of RNA	720011712	Q9Y3U8, O43592, P62917, Q9BTX1, Q5VV42, P18124, P50914, P39023, P62910, P40429, Q99848, P62753, Q9NRG9, Q9UNQ2, P46087, P26373, P36578, O75694, Q8IY37, P42677, P62266, Q9NW13, P15880, Q6PGP7, Q02543, P62241, P62847, Q15477, P62841, P46776, Q9NXF1, P27635, P46778	33	190	716	10946	12.7907	2.65523	2.04544e-07	5.66466e-07	0.000375496	5.2771e-05	1.10461e-05	0.000991315	0.000113122
Reactome_NSP3 K977Q	DAVID Reactome	R-HSA-9716542~Signaling by Rho GTPases, Miro GTPases and RHOBTB3	720012192	Q14204, Q8N5G2, Q96NT0, O95210, Q8IXI1, P51149, Q8IXI2, P63261, Q86Y07, Q00610, O15498, Q99707, Q9NRG9, Q93008, Q92974, Q96CS3, O15173, Q07065, P05556, Q96HY6, P49257, Q07960, Q86UP2, P42677, Q9P0I2, Q96DH6, Q8TBC3, P20700, P62140, Q86XL3, P30519, Q8TAA9, P04350	33	190	723	10946	12.7907	2.62953	2.56134e-07	7.02294e-07	0.000465513	6.60804e-05	1.33034e-05	0.0011939	0.000140247
Reactome_NSP3 K977Q	DAVID Reactome	R-HSA-446203~Asparagine N-linked glycosylation	720010831	Q14204, Q9Y678, Q14697, O15155, P49257, P18085, P39656, O60858, P30101, O75396, O75352, P49755, P04350, O15498, P27824, Q9BVK6, P62820, P27797, P46977, Q14165	20	190	304	10946	7.75194	3.79017	3.07364e-07	1.23883e-06	0.000821007	7.92967e-05	2.28151e-05	0.00204751	0.000247393
Reactome_NSP3 K977Q	DAVID Reactome	R-HSA-1643685~Disease	720009979	Q9Y3U8, Q14204, P04439, P62917, P18124, P39656, P35613, P51149, P39023, P62910, P27824, P62753, Q9NRG9, O94905, Q14573, Q14697, P36578, O75694, P51114, P54709, P62241, P62847, P05023, P46776, P62841, P27635, P27797, P46977, P46778, P04899, Q9BTX1, P12236, Q12849, P63261, P50914, Q9NR09, Q00610, P40429, Q99707, P27448, Q13501, P05556, P26373, O00410, O75352, P42677, P62266, P20700, P15880, P62140,…	56	190	1748	10946	21.7054	1.84565	1.75792e-06	3.33674e-06	0.00220982	0.000453442	5.97907e-05	0.00536584	0.000666341
Reactome_NSP3 K977Q	DAVID Reactome	R-HSA-194315~Signaling by Rho GTPases	720010232	Q14204, Q8N5G2, Q96NT0, O95210, P51149, P63261, Q86Y07, Q00610, O15498, Q99707, Q9NRG9, Q93008, Q92974, Q96CS3, O15173, Q07065, P05556, Q96HY6, P49257, Q07960, Q86UP2, P42677, Q9P0I2, Q96DH6, Q8TBC3, P20700, P62140, Q86XL3, P30519, Q8TAA9, P04350	31	190	707	10946	12.0155	2.52606	1.4767e-06	3.88976e-06	0.00257559	0.000380917	6.78661e-05	0.00609055	0.000776779
Reactome_NSP3 K977Q	DAVID Reactome	R-HSA-597592~Post-translational protein modification	720011312	Q14204, Q8TEY7, O95714, O43852, P04439, P18085, P14735, Q9BTX1, O75147, Q13617, P78527, P39656, P51148, P30101, P51149, Q8IXI2, Q15084, P49755, P61026, O15498, P27824, Q9BVK6, Q9NRG9, Q93008, Q13501, Q07065, Q14697, Q9Y678, P49257, O15155, Q9NP72, Q15907, Q86VP6, O75694, O60858, O75396, O75352, Q86UP2, Q9NY33, P15880, Q9UK73, P04350, P20340, P62820, P27797, P46977, P21796, Q14165	48	190	1441	10946	18.6047	1.91902	4.36189e-06	8.6337e-06	0.00570781	0.00112474	0.000146773	0.0131719	0.00172413
Reactome_NSP3 K977Q	DAVID Reactome	R-HSA-422475~Axon guidance	720010756	Q9Y3U8, Q8TEY7, P62917, Q13617, P18124, P63261, P50914, P39023, Q00610, P62910, P40429, P62753, P05556, P26373, P36578, P42677, P62266, P15880, Q02543, P62241, P04350, P62847, P62841, P46776, P27635, P46778	26	190	553	10946	10.0775	2.70863	3.28436e-06	9.31677e-06	0.00615801	0.000847007	0.000154425	0.0138587	0.00186054
Reactome_NSP3 K977Q	DAVID Reactome	R-HSA-8856688~Golgi-to-ER retrograde transport	720011624	Q14204, O15260, Q9Y678, Q9NP72, P18085, P49755, P04350, P20340, Q9BVK6, Q9P2W9, O75396, P62820	12	190	133	10946	4.65116	5.19794	3.24716e-06	1.8381e-05	0.0121127	0.000837418	0.000297234	0.0266748	0.00367062
Reactome_NSP3 K977Q	DAVID Reactome	R-HSA-9675108~Nervous system development	720012086	Q9Y3U8, Q8TEY7, P62917, Q13617, P18124, P63261, P50914, P39023, Q00610, P62910, P40429, P62753, P05556, P26373, P36578, P42677, P62266, P15880, Q02543, P62241, P04350, P62847, P62841, P46776, P27635, P46778	26	190	578	10946	10.0775	2.59148	7.30622e-06	1.98116e-05	0.0130493	0.00188324	0.00031274	0.0280664	0.00395631
Reactome_NSP3 K977Q	DAVID Reactome	R-HSA-1430728~Metabolism	720009866	Q9Y3U8, O75947, O95674, P48651, A0FGR8, O75027, P40926, P62917, O95470, Q8IV08, P18124, P35613, Q02218, P42704, P39023, P62910, P62753, Q9NRG9, Q14573, Q9UI09, P04406, P36578, O75694, Q96G23, Q15392, P62241, P30519, P62847, P46776, P62841, P27635, P46778, P04899, Q9BTX1, P31153, Q9P035, O00763, Q53EU6, P50914, Q9NZ01, P40429, Q99707, Q9NXE4, P26373, Q12931, Q86UL3, Q6IAN0, P52789, P42677, P62266,…	61	190	2118	10946	23.6434	1.65923	1.72859e-05	2.94464e-05	0.0193339	0.00444987	0.000454022	0.0407455	0.00588032
Reactome_NSP3 K977Q	DAVID Reactome	R-HSA-9735869~SARS-CoV-1 modulates host translation machinery	720012221	P42677, P62266, P15880, P62241, P62847, P62841, P62753	7	190	37	10946	2.71318	10.8993	2.81667e-06	3.64469e-05	0.0238751	0.0122779	0.000537995	0.0482816	0.00727828
Reactome_NSP3 K977Q	DAVID Reactome	R-HSA-9013405~RHOD GTPase cycle	720011785	O15173, P20700, P49257, Q86Y07, Q8TAA9, O95210, Q07960, P51149	8	190	54	10946	3.10078	8.53489	3.73719e-06	3.65155e-05	0.0239195	0.0105501	0.000537995	0.0482816	0.00729197
Reactome_NSP3 K977Q	DAVID Reactome	R-HSA-9013404~RAC2 GTPase cycle	720011784	O15173, P05556, P49257, Q86Y07, Q86XL3, Q8TAA9, O95210, Q07960, P51149	9	190	88	10946	3.48837	5.89199	2.07512e-05	0.000134646	0.0854074	0.0316127	0.00194066	0.174162	0.0268869
Reactome_NSP3 K977Q	DAVID Reactome	R-HSA-70326~Glucose metabolism	720011454	P17858, P04406, P00558, P40926, Q9BTX1, P04075, O75694, P52789, Q9NRG9	9	190	91	10946	3.48837	5.69774	2.72215e-05	0.000170367	0.106816	0.041264	0.00240326	0.215677	0.0340191
Reactome_NSP3 K977Q	DAVID Reactome	R-HSA-6811442~Intra-Golgi and retrograde Golgi-to-ER traffic	720011395	Q14204, Q9Y678, O15260, Q9NP72, P18085, Q9P2W9, O75396, P49755, P04350, O15498, P20340, Q9BVK6, P62820	13	190	202	10946	5.03876	3.70761	4.93579e-05	0.000194513	0.121004	0.0126539	0.00268671	0.241115	0.0388403
Reactome_NSP3 K977Q	DAVID Reactome	R-HSA-9694516~SARS-CoV-2 Infection	720012126	Q14697, P04439, Q9BTX1, O75694, P39656, P42677, P62266, P15880, P62241, P78362, P62847, P27824, P62841, P62753, Q9NRG9, P46977	16	190	299	10946	6.20155	3.08284	6.39513e-05	0.000208806	0.129295	0.0324614	0.00278473	0.249912	0.0416939
Reactome_NSP3 K977Q	DAVID Reactome	R-HSA-9013423~RAC3 GTPase cycle	720011794	O15173, P05556, P49257, Q86Y07, Q8TAA9, O15498, O95210, Q07960, P51149	9	190	94	10946	3.48837	5.5159	3.53286e-05	0.000213544	0.132027	0.0703243	0.00278473	0.249912	0.04264
Reactome_NSP3 K977Q	DAVID Reactome	R-HSA-70171~Glycolysis	720011450	P17858, P04406, P00558, Q9BTX1, P04075, O75694, P52789, Q9NRG9	8	190	71	10946	3.10078	6.49133	2.97118e-05	0.00021421	0.13241	0.0301977	0.00278473	0.249912	0.0427729
Reactome_NSP3 K977Q	DAVID Reactome	R-HSA-5653656~Vesicle-mediated transport	720011168	Q14204, O15260, P18085, O00186, P51148, P51149, P51809, P62330, P63261, Q00610, P49755, P61026, O15498, Q9BVK6, Q9Y678, P49257, O15155, Q9NP72, Q15907, Q9P2W9, O75396, Q9Y4L1, P04350, P20340, P62820, P27797	26	190	673	10946	10.0775	2.22567	9.87927e-05	0.000229723	0.14129	0.0251677	0.00289074	0.259425	0.0458701
Reactome_NSP3 K977Q	DAVID Reactome	R-HSA-9754678~SARS-CoV-2 modulates host translation machinery	720012238	P42677, P62266, P15880, P62241, P62847, P62841, P62753	7	190	51	10946	2.71318	7.90733	2.57987e-05	0.000231085	0.142065	0.0643947	0.00289074	0.259425	0.046142
Reactome_NSP3 K977Q	DAVID Reactome	R-HSA-6798695~Neutrophil degranulation	720011351	Q96CS3, Q14204, Q07065, Q5T4S7, O15260, Q9NP72, P04439, O00264, Q86VP6, P39656, P51148, O95210, P51149, P17858, Q5T9A4, Q7Z6Z7, P30519, P04075, P61026, P20340, Q14165	21	190	482	10946	8.13953	2.51	9.36224e-05	0.000246813	0.150967	0.0238663	0.00303032	0.271952	0.0492823
Reactome_NSP3 K977Q	DAVID Reactome	R-HSA-72695~Formation of the ternary complex, and subsequently, the 43S complex	720011487	P42677, P62266, P15880, P62241, P62847, P62841, P62753	7	190	52	10946	2.71318	7.75526	2.93788e-05	0.000257522	0.156975	0.107472	0.00310431	0.278592	0.0514202
Reactome_NSP3 K977Q	DAVID Reactome	R-HSA-9679506~SARS-CoV Infections	720012097	P05556, Q14697, P04439, Q9BTX1, O75694, P39656, P42677, P62266, P15880, P54709, P62241, P78362, P62847, P27824, P05023, P62841, P62753, Q9NRG9, P46977	19	190	414	10946	7.36434	2.64396	0.000104442	0.000290798	0.175376	0.0265875	0.00344284	0.308973	0.0580637
Reactome_NSP3 K977Q	DAVID Reactome	R-HSA-6811434~COPI-dependent Golgi-to-ER retrograde traffic	720011391	O15260, Q9Y678, P18085, P49755, P04350, Q9BVK6, Q9P2W9, O75396, P62820	9	190	99	10946	3.48837	5.23732	5.33688e-05	0.000305232	0.183232	0.0535888	0.00354627	0.318255	0.0609452
Reactome_NSP3 K977Q	DAVID Reactome	R-HSA-532668~N-glycan trimming in the ER and Calnexin/Calreticulin cycle	720010950	Q14697, P27824, O60858, P30101, P27797, Q14165	6	190	35	10946	2.32558	9.87609	2.69797e-05	0.000310231	0.185935	0.0865177	0.00354627	0.318255	0.0619433
Reactome_NSP3 K977Q	DAVID Reactome	R-HSA-199977~ER to Golgi Anterograde Transport	720010271	Q14204, Q9Y678, O15155, P49257, P18085, P49755, O15498, P04350, Q9BVK6, O75396, P62820	11	190	154	10946	4.26357	4.11504	7.4952e-05	0.000331816	0.197505	0.0563642	0.00372871	0.334628	0.0662522
Reactome_NSP3 K977Q	DAVID Reactome	R-HSA-6807878~COPI-mediated anterograde transport	720011388	Q14204, Q9Y678, O15155, P18085, P49755, O15498, P04350, Q9BVK6, P62820	9	190	101	10946	3.48837	5.13361	6.24959e-05	0.000349916	0.207082	0.0317344	0.00386657	0.347	0.0698656
Reactome_NSP3 K977Q	DAVID Reactome	R-HSA-72702~Ribosomal scanning and start codon recognition	720011488	P42677, P62266, P15880, P62241, P62847, P62841, P62753	7	190	59	10946	2.71318	6.83515	6.76262e-05	0.000515781	0.289688	0.243589	0.00551553	0.494984	0.102974
Reactome_NSP3 K977Q	DAVID Reactome	R-HSA-72649~Translation initiation complex formation	720011484	P42677, P62266, P15880, P62241, P62847, P62841, P62753	7	190	59	10946	2.71318	6.83515	6.76262e-05	0.000515781	0.289688	0.243589	0.00551553	0.494984	0.102974
Reactome_NSP3 K977Q	DAVID Reactome	R-HSA-72662~Activation of the mRNA upon binding of the cap-binding complex and eIFs, and subsequent binding to 43S	720011485	P42677, P62266, P15880, P62241, P62847, P62841, P62753	7	190	60	10946	2.71318	6.72123	7.54474e-05	0.000564982	0.312497	0.144209	0.00594576	0.533594	0.112794
Reactome_NSP3 K977Q	DAVID Reactome	R-HSA-199991~Membrane Trafficking	720010272	Q14204, Q9Y678, O15260, O15155, P49257, Q9NP72, P18085, Q15907, O00186, P51148, Q9P2W9, O75396, P51149, P51809, P62330, P63261, Q00610, P49755, P61026, P04350, O15498, P20340, Q9BVK6, P62820	24	190	634	10946	9.30233	2.18084	0.000253545	0.000578791	0.318766	0.0633287	0.00599591	0.538095	0.115551
Reactome_NSP3 K977Q	DAVID Reactome	R-HSA-8873719~RAB geranylgeranylation	720011646	Q9NP72, Q15907, P61026, P20340, P51148, P62820, P51149	7	190	65	10946	2.71318	6.20421	0.000126427	0.000868095	0.437743	0.177759	0.00885457	0.794641	0.173282
Reactome_NSP3 K977Q	DAVID Reactome	R-HSA-901042~Calnexin/calreticulin cycle	720011774	Q14697, P27824, O60858, P30101, P27797	5	190	26	10946	1.93798	11.0789	7.3107e-05	0.000955908	0.469571	0.246431	0.00960253	0.861765	0.190803
Reactome_NSP3 K977Q	DAVID Reactome	R-HSA-948021~Transport to the Golgi and subsequent modification	720011903	Q14204, Q9Y678, O15155, P49257, P18085, P49755, O15498, P04350, Q9BVK6, O75396, P62820	11	190	185	10946	4.26357	3.42549	0.000376734	0.0013868	0.601515	0.252968	0.0137231	1.23156	0.276751
Reactome_NSP3 K977Q	DAVID Reactome	R-HSA-983169~Class I MHC mediated antigen processing & presentation	720012286	P61619, P55786, Q5T4S7, Q9UII4, O95714, O94822, P04439, Q8IWV8, Q13617, P30101, O75396, Q7Z6Z7, Q9Y385, P27824, P27797, Q96PM5	16	190	381	10946	6.20155	2.41934	0.000974156	0.00249193	0.808757	0.222331	0.0238382	2.13933	0.497017
Reactome_NSP3 K977Q	DAVID Reactome	R-HSA-9700206~Signaling by ALK in cancer	720012142	Q13501, Q9NR09, Q00610, P62753, Q9P2E9, Q9NZJ5	6	190	55	10946	2.32558	6.28478	0.000361395	0.00251686	0.811899	0.728989	0.0238382	2.13933	0.501982
Reactome_NSP3 K977Q	DAVID Reactome	R-HSA-9725370~Signaling by ALK fusions and activated point mutants	720012204	Q13501, Q9NR09, Q00610, P62753, Q9P2E9, Q9NZJ5	6	190	55	10946	2.32558	6.28478	0.000361395	0.00251686	0.811899	0.728989	0.0238382	2.13933	0.501982
Reactome_NSP3 K977Q	DAVID Reactome	R-HSA-9705683~SARS-CoV-2-host interactions	720012173	P42677, P62266, P15880, P04439, P62241, Q9BTX1, O75694, P62847, P62841, P62753, Q9NRG9	11	190	203	10946	4.26357	3.12175	0.000822319	0.00273842	0.83766	0.191234	0.0255714	2.29487	0.546113
Reactome_NSP3 K977Q	DAVID Reactome	R-HSA-9678108~SARS-CoV-1 Infection	720012093	P42677, P62266, Q14697, P15880, P62241, P62847, P27824, P62841, P62753	9	190	142	10946	3.48837	3.65137	0.000813152	0.00319352	0.880052	0.56808	0.029407	2.63909	0.636728
Reactome_NSP3 WT	DAVID Reactome	R-HSA-446203~Asparagine N-linked glycosylation	720010831	P53992, Q9Y678, Q14697, P49257, Q01082, P30101, P68371, O75396, P14314, O75352, P84085, Q9H0U4, P49755, P04350, P27824, Q14165	16	96	304	10946	13.2231	6.0011	7.53499e-09	4.76018e-08	2.59902e-05	1.94402e-06	2.59906e-05	0.00240865	9.50295e-06
Reactome_NSP3 WT	DAVID Reactome	R-HSA-597592~Post-translational protein modification	720011312	O43852, Q8TEM1, P51148, P14314, P30101, P51149, P84085, Q9H0U4, Q15084, P49755, P61026, P27824, Q9NRG9, Q93008, P53992, Q14697, P60604, Q9Y678, P49257, Q9NP72, P14625, Q86VP6, Q8N1F7, Q01082, P68371, O75396, O75352, P12004, P04350, P20340, P21796, Q14165	32	96	1441	10946	26.4463	2.53204	2.84659e-07	7.39296e-07	0.000403574	7.34394e-05	0.000152272	0.0141117	0.000147589
Reactome_NSP3 WT	DAVID Reactome	R-HSA-1430728~Metabolism	720009866	Q9Y305, P08559, P10515, P31153, Q8TEM1, O43678, Q01650, Q8IV08, O00763, P35613, Q00796, Q8NF37, Q96RQ3, Q9P2J5, P42704, P31040, P47897, Q9UJS0, Q9NRG9, P54886, Q9NXE4, P53992, Q9NVE7, P43490, P04406, Q8N1F7, P36873, P19367, Q9HCC0, P21912, P17858, P47985, P04075, P05165, Q13232, P05166, P21796, P46778, Q99714, P06576	40	96	2118	10946	33.0579	2.15337	3.80324e-07	8.3666e-07	0.000456712	9.81188e-05	0.000152272	0.0141117	0.000167026
Reactome_NSP3 WT	DAVID Reactome	R-HSA-392499~Metabolism of proteins	720010689	O43852, Q8TEM1, P51148, P14314, P30101, P51149, P84085, Q9H0U4, Q15084, Q6PI48, Q9P2J5, P49755, P47897, P61026, P27824, Q9NRG9, Q93008, Q14232, P43897, P53992, Q14697, P60604, Q9Y678, P49257, Q9NP72, P14625, Q86VP6, Q8N1F7, Q01082, P68371, O75396, O75352, P12004, P04350, P20340, P21796, P46778, Q14165	38	96	1970	10946	31.405	2.19939	5.21225e-07	1.17219e-06	0.000639809	0.000134467	0.000160003	0.0148281	0.000234008
Reactome_NSP3 WT	DAVID Reactome	R-HSA-196780~Biotin transport and metabolism	720010246	Q96RQ3, P05165, O00763, P05166, Q9HCC0	5	96	11	10946	4.13223	51.8277	2.07032e-08	1.67715e-06	0.000915304	0.000315094	0.000183144	0.0169727	0.000334816
Reactome_NSP3 WT	DAVID Reactome	R-HSA-199977~ER to Golgi Anterograde Transport	720010271	P84085, P53992, Q9H0U4, Q9Y678, P49257, P49755, P04350, Q01082, O75396, P68371	10	96	154	10946	8.26446	7.40395	9.07418e-07	7.16094e-06	0.00390225	0.000702096	0.000651645	0.0603906	0.00142956
Reactome_NSP3 WT	DAVID Reactome	R-HSA-70326~Glucose metabolism	720011454	P17858, P04406, Q8TEM1, Q9UJS0, P04075, Q8N1F7, P19367, Q9NRG9	8	96	91	10946	6.61157	10.0238	1.21871e-06	1.32646e-05	0.00721638	0.00188478	0.00103464	0.0958845	0.00264806
Reactome_NSP3 WT	DAVID Reactome	R-HSA-5653656~Vesicle-mediated transport	720011168	P53992, Q9Y678, P49257, Q9NP72, P14625, Q01082, P51148, P68371, O75396, Q9Y4L1, O00159, P51149, P84085, Q9H0U4, P63261, P49755, P61026, P04350, P20340	19	96	673	10946	15.7025	3.21901	4.7906e-06	1.59736e-05	0.00868373	0.00123521	0.0010902	0.101033	0.00318885
Reactome_NSP3 WT	DAVID Reactome	R-HSA-8856688~Golgi-to-ER retrograde transport	720011624	P84085, Q9H0U4, Q9Y678, Q9NP72, P49755, P04350, P20340, O75396, P68371	9	96	133	10946	7.43802	7.7157	2.33545e-06	1.92555e-05	0.0104585	0.000602364	0.0011402	0.105667	0.00384403
Reactome_NSP3 WT	DAVID Reactome	R-HSA-3371599~Defective HLCS causes multiple carboxylase deficiency	720010558	Q96RQ3, P05165, P05166, Q9HCC0	4	96	7	10946	3.30579	65.1548	1.90589e-07	2.16159e-05	0.011733	0.002995	0.0011402	0.105667	0.00431522
Reactome_NSP3 WT	DAVID Reactome	R-HSA-1428517~The citric acid (TCA) cycle and respiratory electron transport	720009865	P21912, P08559, P42704, P10515, P31040, P47985, O43678, P35613, P21796, P06576	10	96	178	10946	8.26446	6.40566	3.3854e-06	2.29711e-05	0.012464	0.000873054	0.0011402	0.105667	0.00458576
Reactome_NSP3 WT	DAVID Reactome	R-HSA-948021~Transport to the Golgi and subsequent modification	720011903	P84085, P53992, Q9H0U4, Q9Y678, P49257, P49755, P04350, Q01082, O75396, P68371	10	96	185	10946	8.26446	6.16329	4.78143e-06	3.11731e-05	0.0168767	0.003694	0.00134034	0.124214	0.00622312
Reactome_NSP3 WT	DAVID Reactome	R-HSA-70171~Glycolysis	720011450	P17858, P04406, Q8TEM1, P04075, Q8N1F7, P19367, Q9NRG9	7	96	71	10946	5.78512	11.2415	2.69269e-06	3.31428e-05	0.0179335	0.00277501	0.00134034	0.124214	0.00661633
Reactome_NSP3 WT	DAVID Reactome	R-HSA-3323169~Defects in biotin (Btn) metabolism	720010537	Q96RQ3, P05165, P05166, Q9HCC0	4	96	8	10946	3.30579	57.0104	3.78616e-07	3.43676e-05	0.0185901	0.00671746	0.00134034	0.124214	0.00686084
Reactome_NSP3 WT	DAVID Reactome	R-HSA-199991~Membrane Trafficking	720010272	P53992, Q9Y678, P49257, Q9NP72, Q01082, P51148, P68371, O75396, O00159, P51149, P84085, Q9H0U4, P63261, P49755, P61026, P04350, P20340	17	96	634	10946	14.0496	3.05734	3.17843e-05	0.00010086	0.0535832	0.00816694	0.0036713	0.340234	0.0201341
Reactome_NSP3 WT	DAVID Reactome	R-HSA-71406~Pyruvate metabolism and Citric Acid (TCA) cycle	720011471	P21912, P08559, P10515, P31040, P35613, P21796	6	96	55	10946	4.95868	12.4386	7.96916e-06	0.000109345	0.0579582	0.0283744	0.0037314	0.345804	0.0218278
Reactome_NSP3 WT	DAVID Reactome	R-HSA-6811434~COPI-dependent Golgi-to-ER retrograde traffic	720011391	P84085, Q9H0U4, Q9Y678, P49755, P04350, O75396, P68371	7	96	99	10946	5.78512	8.06208	2.46927e-05	0.000213418	0.110004	0.0251613	0.00661985	0.613488	0.042601
Reactome_NSP3 WT	DAVID Reactome	R-HSA-532668~N-glycan trimming in the ER and Calnexin/Calreticulin cycle	720010950	Q14697, P27824, P14314, P30101, Q14165	5	96	35	10946	4.13223	16.2887	1.23154e-05	0.000226854	0.116511	0.0404647	0.00661985	0.613488	0.0452827
Reactome_NSP3 WT	DAVID Reactome	R-HSA-6807878~COPI-mediated anterograde transport	720011388	P84085, Q9H0U4, Q9Y678, P49755, P04350, Q01082, P68371	7	96	101	10946	5.78512	7.90243	2.81254e-05	0.00023805	0.121896	0.0144081	0.00661985	0.613488	0.0475172
Reactome_NSP3 WT	DAVID Reactome	R-HSA-8873719~RAB geranylgeranylation	720011646	Q9H0U4, Q9NP72, P61026, P20340, P51148, P51149	6	96	65	10946	4.95868	10.525	2.11609e-05	0.000242485	0.124021	0.0322267	0.00661985	0.613488	0.0484025
Reactome_NSP3 WT	DAVID Reactome	R-HSA-1643685~Disease	720009979	Q8TEM1, Q12849, P14314, P35613, P12235, P51149, Q96RQ3, P63261, Q9NR09, P27824, Q9NRG9, O94905, P53992, Q14697, Q8N1F7, P36873, Q01082, Q86YT6, P19367, O00410, P68371, Q9HCC0, P51114, O75352, O00159, P20700, P04350, P05165, P05166, P46778	30	96	1748	10946	24.7934	1.95688	0.000136094	0.000274038	0.138987	0.0345052	0.00712498	0.660301	0.0546999
Reactome_NSP3 WT	DAVID Reactome	R-HSA-6811442~Intra-Golgi and retrograde Golgi-to-ER traffic	720011395	P84085, Q9H0U4, Q9Y678, Q9NP72, P49755, P04350, P20340, O75396, P68371	9	96	202	10946	7.43802	5.08014	6.73189e-05	0.000360402	0.178657	0.0172189	0.00894451	0.828924	0.0719356
Reactome_NSP3 WT	DAVID Reactome	R-HSA-196849~Metabolism of water-soluble vitamins and cofactors	720010253	Q9NVE7, Q96RQ3, P43490, P05165, O00763, P05166, Q9HCC0	7	96	124	10946	5.78512	6.43666	0.000104517	0.000715054	0.323321	0.0777142	0.0166711	1.54498	0.142698
Reactome_NSP3 WT	DAVID Reactome	R-HSA-9683686~Maturation of spike protein	720012110	Q14697, P27824, P14314	3	96	5	10946	2.47934	68.4125	6.45539e-06	0.000732796	0.32985	0.140634	0.0166711	1.54498	0.146238
Reactome_NSP3 WT	DAVID Reactome	R-HSA-3296482~Defects in vitamin and cofactor metabolism	720010527	Q96RQ3, P05165, P05166, Q9HCC0	4	96	22	10946	3.30579	20.7311	3.60056e-05	0.000865327	0.376666	0.250222	0.0188987	1.75142	0.172675
Reactome_NSP3 WT	DAVID Reactome	R-HSA-8876198~RAB GEFs exchange GTP for GDP on RABs	720011655	Q9H0U4, Q9NP72, P61026, P20340, P51148, P51149	6	96	90	10946	4.95868	7.60139	0.000133773	0.00108815	0.448137	0.214638	0.0228512	2.11771	0.217115
Reactome_NSP3 WT	DAVID Reactome	R-HSA-901042~Calnexin/calreticulin cycle	720011774	Q14697, P27824, P14314, P30101	4	96	26	10946	3.30579	17.5417	7.16344e-05	0.00142471	0.54088	0.242124	0.0280196	2.59669	0.284219
Reactome_NSP3 WT	DAVID Reactome	R-HSA-168256~Immune System	720010046	P55786, Q16864, Q8TEM1, Q8IV08, P51148, P14314, P30101, P51149, Q8NF37, P63261, P61026, P27824, P43378, Q9NRG9, Q96CS3, P53992, P60604, Q9NP72, P18031, P14625, Q86VP6, Q8N1F7, P68371, O75396, O00159, P20700, P17858, P04350, P04075, P20340, Q14165	31	96	2024	10946	25.6198	1.74637	0.000798056	0.0014369	0.543932	0.186151	0.0280196	2.59669	0.28665
Reactome_NSP3 WT	DAVID Reactome	R-HSA-71291~Metabolism of amino acids and derivatives	720011466	P54886, P08559, Q96RQ3, Q9P2J5, P10515, P47897, Q9UJS0, Q01650, Q9HCC0, P46778, Q99714	11	96	376	10946	9.09091	3.33572	0.00043628	0.00152468	0.565305	0.106478	0.028706	2.6603	0.304147
Reactome_NSP3 WT	DAVID Reactome	R-HSA-1268020~Mitochondrial protein import	720009814	Q9UJS0, P12235, P21796, Q9HAV7, P06576	5	96	64	10946	4.13223	8.90788	0.000236686	0.00227257	0.711262	0.386501	0.0410615	3.80533	0.453169
Reactome_NSP3 WT	DAVID Reactome	R-HSA-70268~Pyruvate metabolism	720011453	P08559, P10515, P35613, P21796	4	96	31	10946	3.30579	14.7124	0.00014579	0.0023871	0.728804	0.637832	0.0410615	3.80533	0.47598
Reactome_NSP3 WT	DAVID Reactome	R-HSA-168255~Influenza Infection	720010045	Q8TEM1, Q12849, Q8N1F7, P27824, O00410, Q9NRG9, P46778	7	96	157	10946	5.78512	5.08373	0.000447423	0.00240653	0.731673	0.206198	0.0410615	3.80533	0.479851
Reactome_NSP3 WT	DAVID Reactome	R-HSA-204005~COPII-mediated vesicle transport	720010313	P53992, Q9H0U4, P49257, P49755, O75396	5	96	68	10946	4.13223	8.38388	0.000314785	0.00283711	0.78802	0.556152	0.0450538	4.17531	0.565584
Reactome_NSP3 WT	DAVID Reactome	R-HSA-5694530~Cargo concentration in the ER	720011305	P53992, P49257, P49755, O75396	4	96	33	10946	3.30579	13.8207	0.000187071	0.00286139	0.79082	0.686029	0.0450538	4.17531	0.570418
Reactome_NSP3 WT	DAVID Reactome	R-HSA-9609507~Protein localization	720011913	Q9UJS0, P12235, P21796, Q93008, Q9HAV7, Q13011, P06576	7	96	163	10946	5.78512	4.8966	0.000560337	0.00290196	0.795415	0.251149	0.0450538	4.17531	0.578493
Reactome_NSP3 WT	DAVID Reactome	R-HSA-6798695~Neutrophil degranulation	720011351	Q96CS3, Q8NF37, Q9NP72, P17858, P04075, Q86VP6, P61026, P20340, P51148, P68371, Q14165, P51149	12	96	482	10946	9.91736	2.83869	0.000998952	0.00297058	0.80296	0.227295	0.0450538	4.17531	0.592152
Reactome_NSP5 K90R	DAVID Reactome	R-HSA-901042~Calnexin/calreticulin cycle	720011774	Q14697, P27824, P14314, P30101, P27797	5	59	26	10946	7.14286	35.678	2.30859e-07	9.72636e-06	0.0037958	0.000893024	0.00380301	0.332642	0.0019403
Reactome_NSP5 K90R	DAVID Reactome	R-HSA-5663205~Infectious disease	720011233	O94973, Q14697, P04899, P26373, Q8TEM1, P68371, P14314, Q9Y4I1, O00159, P17302, Q9BUF5, P01889, P40429, Q5SRE5, P27824, P27797, Q9UNX3	17	59	960	10946	24.2857	3.28535	7.49927e-06	2.53262e-05	0.00985382	0.00193295	0.00428488	0.37479	0.00505226
Reactome_NSP5 K90R	DAVID Reactome	R-HSA-532668~N-glycan trimming in the ER and Calnexin/Calreticulin cycle	720010950	Q14697, P27824, P14314, P30101, P27797	5	59	35	10946	7.14286	26.5036	1.09787e-06	3.28763e-05	0.0127726	0.00367549	0.00428488	0.37479	0.00655839
Reactome_NSP5 K90R	DAVID Reactome	R-HSA-168255~Influenza Infection	720010045	P26373, P40429, Q8TEM1, Q5SRE5, P27824, P27797, Q9UNX3	7	59	157	10946	10	8.27183	1.99349e-05	0.000173037	0.0654251	0.0102338	0.0169144	1.47947	0.0345162
Reactome_NSP5 K90R	DAVID Reactome	R-HSA-9683686~Maturation of spike protein	720012110	Q14697, P27824, P14314	3	59	5	10946	4.28571	111.315	1.47628e-06	0.000273137	0.101305	0.0340663	0.0213593	1.86826	0.0544807
Reactome_NSP5 K90R	DAVID Reactome	R-HSA-983170~Antigen Presentation: Folding, assembly and peptide loading of class I MHC	720012287	P01889, P27824, P30101, P27797	4	59	29	10946	5.71429	25.5897	1.63509e-05	0.000467805	0.167194	0.0962892	0.0304853	2.66649	0.0933005
Reactome_NSP5 WT	DAVID Reactome	R-HSA-1430728~Metabolism	720009866	Q9Y3U8, P31930, O75947, P08559, O75964, P10515, Q8TEM1, O00763, Q00796, Q96RQ3, P50914, P25705, P42704, P04181, Q15181, P31040, P62910, P40429, P22695, Q9UJS0, P00367, Q8NFH5, P61106, P54886, P04406, Q12931, Q8N1F7, P19367, P11177, Q6IAN0, Q9HCC0, P34897, P42677, P21912, P62266, P17858, P47985, P04075, P05165, Q13232, P05166, P49748, P56192, P21796, P46778, Q99714, P06576	47	95	2118	10946	41.5929	2.55684	3.25183e-11	8.48086e-11	3.95208e-08	8.38973e-09	3.95208e-08	3.34146e-06	1.69254e-08
Reactome_NSP5 WT	DAVID Reactome	R-HSA-1428517~The citric acid (TCA) cycle and respiratory electron transport	720009865	O75947, P31930, P08559, O75964, P10515, Q12931, P11177, P21912, P25705, P42704, P31040, P22695, P47985, P21796, P06576	15	95	178	10946	13.2743	9.70964	2.89331e-11	3.04097e-10	1.41709e-07	7.46473e-09	7.08547e-08	5.99072e-06	6.06893e-08
Reactome_NSP5 WT	DAVID Reactome	R-HSA-71291~Metabolism of amino acids and derivatives	720011466	P54886, Q9Y3U8, P08559, P10515, P11177, Q9HCC0, P42677, P62266, Q96RQ3, P50914, P04181, P40429, P62910, Q9UJS0, P00367, P56192, P46778, Q99714	18	95	376	10946	15.9292	5.5159	2.91928e-09	1.68736e-08	7.86307e-06	7.53174e-07	2.62103e-06	0.000221607	3.3675e-06
Reactome_NSP5 WT	DAVID Reactome	R-HSA-392499~Metabolism of proteins	720010689	Q9Y3U8, P18085, Q8TEM1, P78527, P51148, P14314, P30101, P51149, Q9H0U4, Q15084, P50914, Q6PI48, Q15181, P62910, P40429, P61006, P49755, P61586, Q9NSE4, Q8NFH5, P61106, P43897, Q14697, P49411, Q9NP72, P14625, Q86VP6, Q8N1F7, Q01082, P68371, O75396, O75352, P42677, P62266, P20340, P61019, P56192, P21796, P46778, Q14165	40	95	1970	10946	35.3982	2.33951	3.51765e-08	8.40681e-08	3.9175e-05	9.0755e-06	9.79394e-06	0.000828071	1.67776e-05
Reactome_NSP5 WT	DAVID Reactome	R-HSA-163200~Respiratory electron transport, ATP synthesis by chemiosmotic coupling, and heat production by uncoupling proteins.	720009961	P21912, P31930, O75947, P25705, O75964, P42704, Q12931, P31040, P22695, P47985, P06576	11	95	127	10946	9.73451	9.97978	1.13401e-08	1.22774e-07	5.72112e-05	2.92575e-06	1.14426e-05	0.000967461	2.45023e-05
Reactome_NSP5 WT	DAVID Reactome	R-HSA-168273~Influenza Viral RNA Transcription and Replication	720010050	Q9Y3U8, P42677, P62266, P50914, P62910, P40429, Q8TEM1, Q8N1F7, O00410, Q8NFH5, P46778	11	95	136	10946	9.73451	9.31935	2.3288e-08	2.34263e-07	0.000109161	1.80247e-05	1.81945e-05	0.00153833	4.67523e-05
Reactome_NSP5 WT	DAVID Reactome	R-HSA-168255~Influenza Infection	720010045	Q9Y3U8, P42677, P62266, P50914, P62910, P40429, Q8TEM1, Q8N1F7, O00410, Q8NFH5, P46778	11	95	157	10946	9.73451	8.07281	1.03055e-07	8.89875e-07	0.000414596	5.3175e-05	5.92402e-05	0.00500872	0.000177594
Reactome_NSP5 WT	DAVID Reactome	R-HSA-8873719~RAB geranylgeranylation	720011646	Q9H0U4, Q9NP72, P61006, P20340, P51148, P61019, P61106, P51149	8	95	65	10946	7.07965	14.1811	8.03186e-08	1.27524e-06	0.000594085	0.000124325	7.42826e-05	0.00628055	0.000254501
Reactome_NSP5 WT	DAVID Reactome	R-HSA-196780~Biotin transport and metabolism	720010246	Q96RQ3, P05165, O00763, P05166, Q9HCC0	5	95	11	10946	4.42478	52.3732	1.96339e-08	1.60736e-06	0.000748748	0.000298823	8.32254e-05	0.00703665	0.000320783
Reactome_NSP5 WT	DAVID Reactome	R-HSA-72766~Translation	720011493	Q9Y3U8, P49411, P42677, P62266, P50914, Q6PI48, Q15181, P40429, P62910, Q9NSE4, P56192, P46778, P43897	13	95	292	10946	11.5044	5.1297	1.30491e-06	7.01975e-06	0.00326587	0.000336611	0.00032712	0.0276578	0.00140094
Reactome_NSP5 WT	DAVID Reactome	R-HSA-70326~Glucose metabolism	720011454	P17858, P04406, Q8TEM1, Q9UJS0, P04075, Q8N1F7, P19367, Q8NFH5	8	95	91	10946	7.07965	10.1293	1.12473e-06	1.23701e-05	0.00574793	0.00173957	0.000524044	0.0443075	0.00246871
Reactome_NSP5 WT	DAVID Reactome	R-HSA-1268020~Mitochondrial protein import	720009814	P25705, Q9UJS0, P10809, P12235, P21796, Q9HAV7, P06576	7	95	64	10946	6.19469	12.6023	1.23137e-06	1.71443e-05	0.00795747	0.00253832	0.000665769	0.0562904	0.00342148
Reactome_NSP5 WT	DAVID Reactome	R-HSA-3371599~Defective HLCS causes multiple carboxylase deficiency	720010558	Q96RQ3, P05165, P05166, Q9HCC0	4	95	7	10946	3.53982	65.8406	1.82688e-07	2.0939e-05	0.00971024	0.00287102	0.000750584	0.0634614	0.0041788
Reactome_NSP5 WT	DAVID Reactome	R-HSA-70171~Glycolysis	720011450	P17858, P04406, Q8TEM1, P04075, Q8N1F7, P19367, Q8NFH5	7	95	71	10946	6.19469	11.3598	2.50919e-06	3.1208e-05	0.0144379	0.00258614	0.00103433	0.0874517	0.00622815
Reactome_NSP5 WT	DAVID Reactome	R-HSA-3323169~Defects in biotin (Btn) metabolism	720010537	Q96RQ3, P05165, P05166, Q9HCC0	4	95	8	10946	3.53982	57.6105	3.62947e-07	3.32938e-05	0.0153954	0.00644036	0.00103433	0.0874517	0.00664439
Reactome_NSP5 WT	DAVID Reactome	R-HSA-2408522~Selenoamino acid metabolism	720010424	Q9Y3U8, P42677, P62266, P50914, P62910, P40429, P56192, P46778	8	95	119	10946	7.07965	7.74595	8.51096e-06	7.04591e-05	0.0323019	0.00656586	0.00205212	0.173506	0.0140612
Reactome_NSP5 WT	DAVID Reactome	R-HSA-71406~Pyruvate metabolism and Citric Acid (TCA) cycle	720011471	P21912, P08559, P10515, P31040, P11177, P21796	6	95	55	10946	5.30973	12.5696	7.49987e-06	0.000103985	0.047304	0.026726	0.00277373	0.234517	0.0207514
Reactome_NSP5 WT	DAVID Reactome	R-HSA-8876198~RAB GEFs exchange GTP for GDP on RABs	720011655	Q9H0U4, Q9NP72, P61006, P20340, P51148, P61106, P51149	7	95	90	10946	6.19469	8.96164	1.23308e-05	0.000119044	0.053967	0.0220234	0.00277373	0.234517	0.0237564
Reactome_NSP5 WT	DAVID Reactome	R-HSA-156902~Peptide chain elongation	720009921	Q9Y3U8, P42677, P62266, P50914, P62910, P40429, P46778	7	95	90	10946	6.19469	8.96164	1.23308e-05	0.000119044	0.053967	0.0220234	0.00277373	0.234517	0.0237564
Reactome_NSP5 WT	DAVID Reactome	R-HSA-192823~Viral mRNA Translation	720010210	Q9Y3U8, P42677, P62266, P50914, P62910, P40429, P46778	7	95	90	10946	6.19469	8.96164	1.23308e-05	0.000119044	0.053967	0.0220234	0.00277373	0.234517	0.0237564
Reactome_NSP5 WT	DAVID Reactome	R-HSA-8949613~Cristae formation	720011702	O75947, P25705, O75964, Q16891, P06576	5	95	31	10946	4.42478	18.584	6.29438e-06	0.000134362	0.0606968	0.0428994	0.00282315	0.238695	0.0268131
Reactome_NSP5 WT	DAVID Reactome	R-HSA-597592~Post-translational protein modification	720011312	P18085, Q8TEM1, P78527, P51148, P14314, P30101, P51149, Q9H0U4, Q15084, P61006, P49755, P61586, Q8NFH5, P61106, Q14697, Q9NP72, P14625, Q86VP6, Q8N1F7, Q01082, P68371, O75396, O75352, P20340, P61019, P21796, Q14165	27	95	1441	10946	23.8938	2.1589	6.2393e-05	0.000138719	0.0626024	0.015969	0.00282315	0.238695	0.0276826
Reactome_NSP5 WT	DAVID Reactome	R-HSA-156842~Eukaryotic Translation Elongation	720009920	Q9Y3U8, P42677, P62266, P50914, P62910, P40429, P46778	7	95	94	10946	6.19469	8.58029	1.64242e-05	0.000151456	0.0681505	0.0333317	0.00282315	0.238695	0.0302241
Reactome_NSP5 WT	DAVID Reactome	R-HSA-72764~Eukaryotic Translation Termination	720011492	Q9Y3U8, P42677, P62266, P50914, P62910, P40429, P46778	7	95	94	10946	6.19469	8.58029	1.64242e-05	0.000151456	0.0681505	0.0333317	0.00282315	0.238695	0.0302241
Reactome_NSP5 WT	DAVID Reactome	R-HSA-2408557~Selenocysteine synthesis	720010427	Q9Y3U8, P42677, P62266, P50914, P62910, P40429, P46778	7	95	94	10946	6.19469	8.58029	1.64242e-05	0.000151456	0.0681505	0.0333317	0.00282315	0.238695	0.0302241
Reactome_NSP5 WT	DAVID Reactome	R-HSA-975956~Nonsense Mediated Decay (NMD) independent of the Exon Junction Complex (EJC)	720012258	Q9Y3U8, P42677, P62266, P50914, P62910, P40429, P46778	7	95	96	10946	6.19469	8.40154	1.88579e-05	0.000170091	0.0762086	0.0240334	0.00304855	0.257753	0.0339424
Reactome_NSP5 WT	DAVID Reactome	R-HSA-9633012~Response of EIF2AK4 (GCN2) to amino acid deficiency	720011951	Q9Y3U8, P42677, P62266, P50914, P62910, P40429, P46778	7	95	102	10946	6.19469	7.90733	2.80092e-05	0.000237082	0.104608	0.0284921	0.00394573	0.333609	0.0473093
Reactome_NSP5 WT	DAVID Reactome	R-HSA-72689~Formation of a pool of free 40S subunits	720011486	Q9Y3U8, P42677, P62266, P50914, P62910, P40429, P46778	7	95	102	10946	6.19469	7.90733	2.80092e-05	0.000237082	0.104608	0.0284921	0.00394573	0.333609	0.0473093
Reactome_NSP5 WT	DAVID Reactome	R-HSA-611105~Respiratory electron transport	720011314	P21912, P31930, P42704, Q12931, P31040, P22695, P47985	7	95	103	10946	6.19469	7.83056	2.98408e-05	0.000250024	0.109993	0.0303268	0.00401763	0.339688	0.0498915
Reactome_NSP5 WT	DAVID Reactome	R-HSA-446203~Asparagine N-linked glycosylation	720010831	Q9H0U4, Q14697, P18085, P49755, Q01082, O75396, P14314, O75352, P30101, P68371, Q14165	11	95	304	10946	9.73451	4.16918	6.19534e-05	0.000270544	0.118465	0.0158574	0.00420246	0.355315	0.0539857
Reactome_NSP5 WT	DAVID Reactome	R-HSA-2262752~Cellular responses to stress	720010418	Q9Y3U8, P14625, Q8TEM1, Q8N1F7, P68371, Q9Y4L1, P42677, P62266, P20700, Q15084, P50914, P42704, P40429, P62910, P02545, P49748, Q8NFH5, P46778	18	95	789	10946	15.9292	2.62862	0.00012836	0.00035002	0.150526	0.0325766	0.00526159	0.444864	0.0698419
Reactome_NSP5 WT	DAVID Reactome	R-HSA-72312~rRNA processing	720011482	Q9Y3U8, P42677, P62266, P50914, P62910, P40429, Q9Y2P8, P46778, Q99714	9	95	205	10946	7.9646	5.05849	6.9472e-05	0.000370183	0.158473	0.052353	0.0053908	0.455788	0.0738645
Reactome_NSP5 WT	DAVID Reactome	R-HSA-156827~L13a-mediated translational silencing of Ceruloplasmin expression	720009919	Q9Y3U8, P42677, P62266, P50914, P62910, P40429, P46778	7	95	112	10946	6.19469	7.20132	5.12146e-05	0.000393277	0.167484	0.0514823	0.00549201	0.464346	0.0784716
Reactome_NSP5 WT	DAVID Reactome	R-HSA-1799339~SRP-dependent cotranslational protein targeting to membrane	720010133	Q9Y3U8, P42677, P62266, P50914, P62910, P40429, P46778	7	95	113	10946	6.19469	7.13759	5.42141e-05	0.00041249	0.174908	0.105867	0.00549201	0.464346	0.0823044
Reactome_NSP5 WT	DAVID Reactome	R-HSA-72706~GTP hydrolysis and joining of the 60S ribosomal subunit	720011489	Q9Y3U8, P42677, P62266, P50914, P62910, P40429, P46778	7	95	113	10946	6.19469	7.13759	5.42141e-05	0.00041249	0.174908	0.105867	0.00549201	0.464346	0.0823044
Reactome_NSP5 WT	DAVID Reactome	R-HSA-8953897~Cellular responses to stimuli	720011713	Q9Y3U8, P14625, Q8TEM1, Q8N1F7, P68371, Q9Y4L1, P42677, P62266, P20700, Q15084, P50914, P42704, P40429, P62910, P02545, P49748, Q8NFH5, P46778	18	95	803	10946	15.9292	2.58279	0.000160207	0.000429338	0.181363	0.040494	0.00555754	0.469886	0.0856653
Reactome_NSP5 WT	DAVID Reactome	R-HSA-163210~Formation of ATP by chemiosmotic coupling	720009962	O75947, P25705, O75964, P06576	4	95	18	10946	3.53982	25.6047	1.48432e-05	0.000455811	0.191404	0.11194	0.00567041	0.47943	0.0909463
Reactome_NSP5 WT	DAVID Reactome	R-HSA-927802~Nonsense-Mediated Decay (NMD)	720011890	Q9Y3U8, P42677, P62266, P50914, P62910, P40429, P46778	7	95	116	10946	6.19469	6.95299	6.40879e-05	0.000474562	0.198442	0.0793506	0.00567041	0.47943	0.0946869
Reactome_NSP5 WT	DAVID Reactome	R-HSA-975957~Nonsense Mediated Decay (NMD) enhanced by the Exon Junction Complex (EJC)	720012259	Q9Y3U8, P42677, P62266, P50914, P62910, P40429, P46778	7	95	116	10946	6.19469	6.95299	6.40879e-05	0.000474562	0.198442	0.0793506	0.00567041	0.47943	0.0946869
Reactome_NSP5 WT	DAVID Reactome	R-HSA-9609507~Protein localization	720011913	P25705, Q9UJS0, P10809, P12235, P21796, Q9HAV7, Q13011, P06576	8	95	163	10946	7.07965	5.65502	8.24969e-05	0.000493283	0.205408	0.0416767	0.00574675	0.485884	0.0984212
Reactome_NSP5 WT	DAVID Reactome	R-HSA-1643685~Disease	720009979	Q9Y3U8, Q8TEM1, P14314, P12235, P51149, Q96RQ3, P50914, P62910, P40429, P02545, O94905, Q8NFH5, Q14697, P49411, Q8N1F7, Q01082, Q86YT6, P19367, O00410, P68371, Q9HCC0, O75352, O00159, P42677, P62266, P20700, P05165, P05166, P46778	29	95	1748	10946	25.6637	1.91156	0.000274038	0.000539693	0.222417	0.0682693	0.00607	0.513215	0.107679
Reactome_NSP5 WT	DAVID Reactome	R-HSA-72737~Cap-dependent Translation Initiation	720011491	Q9Y3U8, P42677, P62266, P50914, P62910, P40429, P46778	7	95	120	10946	6.19469	6.72123	7.94959e-05	0.000568397	0.232754	0.0596774	0.00607	0.513215	0.113404
Reactome_NSP5 WT	DAVID Reactome	R-HSA-72613~Eukaryotic Translation Initiation	720011483	Q9Y3U8, P42677, P62266, P50914, P62910, P40429, P46778	7	95	120	10946	6.19469	6.72123	7.94959e-05	0.000568397	0.232754	0.0596774	0.00607	0.513215	0.113404
Reactome_NSP5 WT	DAVID Reactome	R-HSA-5653656~Vesicle-mediated transport	720011168	Q9NP72, P18085, P14625, Q01082, P51148, P68371, O75396, Q9Y4L1, O00159, P51149, Q9H0U4, P61006, P49755, P20340, P02786, P61106	16	95	673	10946	14.1593	2.73928	0.000201204	0.000573133	0.234447	0.0505913	0.00607	0.513215	0.114349
Reactome_NSP5 WT	DAVID Reactome	R-HSA-9007101~Rab regulation of trafficking	720011769	Q9H0U4, Q9NP72, P61006, P20340, P51148, P61106, P51149	7	95	124	10946	6.19469	6.50441	9.78043e-05	0.000676069	0.270324	0.0729096	0.00700107	0.591936	0.134879
Reactome_NSP5 WT	DAVID Reactome	R-HSA-6798695~Neutrophil degranulation	720011351	Q96CS3, Q9NP72, Q86VP6, P51148, P68371, P51149, P17858, Q5T9A4, P04075, P61586, P20340, P61106, Q14165	13	95	482	10946	11.5044	3.10762	0.000254888	0.000826802	0.319855	0.0636532	0.00831951	0.703409	0.164938
Reactome_NSP5 WT	DAVID Reactome	R-HSA-3296482~Defects in vitamin and cofactor metabolism	720010527	Q96RQ3, P05165, P05166, Q9HCC0	4	95	22	10946	3.53982	20.9493	3.4551e-05	0.000839092	0.323742	0.241448	0.00831951	0.703409	0.167389
Reactome_NSP5 WT	DAVID Reactome	R-HSA-8949215~Mitochondrial calcium ion transport	720011700	Q99623, Q9UJZ1, Q8NE86, P21796	4	95	23	10946	3.53982	20.0384	4.15476e-05	0.000958978	0.360519	0.210084	0.00928203	0.78479	0.191294
Reactome_NSP5 WT	DAVID Reactome	R-HSA-8856688~Golgi-to-ER retrograde transport	720011624	Q9H0U4, Q9NP72, P18085, P49755, P20340, O75396, P68371	7	95	133	10946	6.19469	6.06427	0.000151723	0.000976007	0.365578	0.0383911	0.00928203	0.78479	0.194689
Reactome_NSP5 WT	DAVID Reactome	R-HSA-2980766~Nuclear Envelope Breakdown	720010486	P20700, Q8TEM1, Q8N1F7, P02545, Q8NFH5	5	95	52	10946	4.42478	11.0789	8.33837e-05	0.00100747	0.374823	0.275815	0.00938966	0.79389	0.200963
Reactome_NSP5 WT	DAVID Reactome	R-HSA-6791226~Major pathway of rRNA processing in the nucleolus and cytosol	720011341	Q9Y3U8, P42677, P62266, P50914, P62910, P40429, Q9Y2P8, P46778	8	95	185	10946	7.07965	4.98253	0.000198546	0.00104375	0.385312	0.142462	0.00953697	0.806345	0.208194
Reactome_NSP5 WT	DAVID Reactome	R-HSA-1592230~Mitochondrial biogenesis	720009926	O75947, P25705, O75964, P00367, Q16891, P06576	6	95	95	10946	5.30973	7.27712	0.000170197	0.0013226	0.4603	0.161095	0.0118526	1.00213	0.26378
Reactome_NSP5 WT	DAVID Reactome	R-HSA-68875~Mitotic Prophase	720011403	Q9H0U4, P20700, Q8TEM1, Q8N1F7, P02545, P61019, Q8NFH5	7	95	142	10946	6.19469	5.67991	0.000227584	0.00136933	0.471941	0.209345	0.0120398	1.01796	0.273094
Reactome_NSP5 WT	DAVID Reactome	R-HSA-8868773~rRNA processing in the nucleus and cytosol	720011644	Q9Y3U8, P42677, P62266, P50914, P62910, P40429, Q9Y2P8, P46778	8	95	195	10946	7.07965	4.72702	0.000284134	0.0014163	0.483388	0.0706937	0.0122222	1.03338	0.282454
Reactome_NSP5 WT	DAVID Reactome	R-HSA-9711097~Cellular response to starvation	720012189	Q9Y3U8, P42677, P62266, P50914, P62910, P40429, P46778	7	95	157	10946	6.19469	5.13724	0.000419775	0.00228105	0.654991	0.194788	0.0192736	1.62957	0.454717
Reactome_NSP5 WT	DAVID Reactome	R-HSA-70268~Pyruvate metabolism	720011453	P08559, P10515, P11177, P21796	4	95	31	10946	3.53982	14.8672	0.000139991	0.00231614	0.660598	0.622901	0.0192736	1.62957	0.461702
Reactome_NSP5 WT	DAVID Reactome	R-HSA-376176~Signaling by ROBO receptors	720010607	Q9Y3U8, P42677, P62266, P50914, P62910, P40429, P61586, P46778	8	95	219	10946	7.07965	4.20899	0.000616818	0.00273642	0.721105	0.147164	0.0223714	1.89149	0.545368
Reactome_NSP5 WT	DAVID Reactome	R-HSA-199991~Membrane Trafficking	720010272	Q9NP72, P18085, Q01082, P51148, P68371, O75396, O00159, P51149, Q9H0U4, P61006, P49755, P20340, P02786, P61106	14	95	634	10946	12.3894	2.54431	0.00108317	0.00288013	0.73922	0.24392	0.0231404	1.9565	0.573969
Reactome_NSP5 WT	DAVID Reactome	R-HSA-5663205~Infectious disease	720011233	Q9Y3U8, Q14697, P49411, Q8TEM1, Q8N1F7, O00410, P68371, P14314, P12235, O00159, P51149, P42677, P62266, P50914, P40429, P62910, Q8NFH5, P46778	18	95	960	10946	15.9292	2.16039	0.00135875	0.00305747	0.759963	0.295872	0.0241488	2.04177	0.609255
Reactome_NSP5 WT	DAVID Reactome	R-HSA-532668~N-glycan trimming in the ER and Calnexin/Calreticulin cycle	720010950	Q14697, P14314, P30101, Q14165	4	95	35	10946	3.53982	13.1681	0.000226854	0.00328996	0.784684	0.53278	0.025552	2.1604	0.655507
Reactome_NSP5 WT	DAVID Reactome	R-HSA-176033~Interactions of Vpr with host cellular proteins	720010112	Q8TEM1, Q8N1F7, P12235, Q8NFH5	4	95	36	10946	3.53982	12.8023	0.000253524	0.00356691	0.810838	0.625162	0.0269861	2.28165	0.710591
Reactome_NSP5 WT	DAVID Reactome	R-HSA-9010553~Regulation of expression of SLITs and ROBOs	720011775	Q9Y3U8, P42677, P62266, P50914, P62910, P40429, P46778	7	95	172	10946	6.19469	4.68923	0.000724335	0.00359042	0.812906	0.170512	0.0269861	2.28165	0.715265
Reactome_NSP5 WT	DAVID Reactome	R-HSA-71387~Metabolism of carbohydrates	720011469	Q00796, P17858, P04406, Q8TEM1, Q9UJS0, P04075, Q8N1F7, P19367, Q8NFH5	9	95	295	10946	7.9646	3.51522	0.0010252	0.00379191	0.829733	0.232516	0.0279131	2.36004	0.75533
Reactome_NSP5 WT	DAVID Reactome	R-HSA-1852241~Organelle biogenesis and maintenance	720010160	O75947, P25705, O75964, P18085, P61006, P00367, P68371, Q16891, P06576	9	95	296	10946	7.9646	3.50334	0.00104988	0.00387021	0.835857	0.237392	0.0279131	2.36004	0.770897
Reactome_NSP5 WT	DAVID Reactome	R-HSA-2995410~Nuclear Envelope (NE) Reassembly	720010490	P20700, Q8N1F7, P02545, P68371, Q8NFH5	5	95	75	10946	4.42478	7.6814	0.000473277	0.00389346	0.837633	0.386477	0.0279131	2.36004	0.775518
Reactome_NSP5 WT	DAVID Reactome	R-HSA-196849~Metabolism of water-soluble vitamins and cofactors	720010253	Q96RQ3, P05165, O00763, P05166, Q9HCC0, P34897	6	95	124	10946	5.30973	5.57521	0.000715054	0.00423116	0.861364	0.425152	0.0298746	2.52588	0.842642
Reactome_NSP5 WT	DAVID Reactome	R-HSA-379724~tRNA Aminoacylation	720010617	Q6PI48, Q15181, Q9NSE4, P56192	4	95	42	10946	3.53982	10.9734	0.000462962	0.00552639	0.924411	0.812243	0.0384373	3.24985	1.09988
Reactome_NSP5 WT	DAVID Reactome	R-HSA-8964539~Glutamate and glutamine metabolism	720011741	P54886, P04181, P00367	3	95	14	10946	2.65487	24.6902	0.000215092	0.00620862	0.9451	0.967967	0.0425473	3.59735	1.23524
Reactome_NSP5 WT	DAVID Reactome	R-HSA-8854214~TBC/RABGAPs	720011620	P61006, P20340, P51148, P51149	4	95	46	10946	3.53982	10.0192	0.000657326	0.00712954	0.964359	0.398866	0.0481503	4.07107	1.4178
Reactome_NSP6 S106-108del	DAVID Reactome	R-HSA-1799339~SRP-dependent cotranslational protein targeting to membrane	720010133	Q9Y3U8, Q9Y5M8, P18124, P42766, P62277, P08240, P50914, P39023, P62899, P62910, P40429, P83731, P61009, P62753, Q07020, P04843, P26373, P36578, P18077, Q15629, P42677, O76094, P62266, P84098, P43307, P15880, Q02543, P62263, P62241, P62701, P62841, P46776, P05387, P27635, P46778, P62249	36	236	113	10946	11.25	14.7764	6.44995e-33	1.35108e-31	8.79556e-29	1.33127e-29	8.79556e-29	7.37692e-27	2.69802e-29
Reactome_NSP6 S106-108del	DAVID Reactome	R-HSA-168255~Influenza Infection	720010045	Q9Y3U8, Q9BTX1, Q8TEM1, P12236, P18124, P42766, P62277, P50914, P39023, P62899, P62910, P40429, P83731, P27824, P62753, Q9NRG9, Q8NFH5, Q07020, P26373, P36578, P18077, Q8N1F7, O75694, O00410, P42677, P62266, P84098, P15880, Q02543, P62263, P62241, P62701, P62841, P46776, P05387, P27635, P27797, P46778, P62249	39	236	157	10946	12.1875	11.5215	5.5903e-31	8.31517e-30	5.41317e-27	2.8846e-28	2.70659e-27	2.27004e-25	1.66048e-27
Reactome_NSP6 S106-108del	DAVID Reactome	R-HSA-168273~Influenza Viral RNA Transcription and Replication	720010050	Q9Y3U8, Q9BTX1, Q8TEM1, P18124, P42766, P62277, P50914, P39023, P62899, P62910, P40429, P83731, P62753, Q9NRG9, Q8NFH5, Q07020, P26373, P36578, P18077, Q8N1F7, O75694, O00410, P42677, P62266, P84098, P15880, Q02543, P62263, P62241, P62701, P62841, P46776, P05387, P27635, P46778, P62249	36	236	136	10946	11.25	12.2774	1.07145e-29	1.73329e-28	1.12837e-25	8.29301e-27	3.76123e-26	3.15458e-24	3.46125e-26
Reactome_NSP6 S106-108del	DAVID Reactome	R-HSA-8868773~rRNA processing in the nucleus and cytosol	720011644	Q9Y3U8, Q8IY81, P18124, P42766, Q9UGY1, P62277, P50914, P39023, P62899, P62910, P40429, P83731, Q99848, P62753, P56182, Q07020, Q9UNQ2, P46087, P26373, Q13601, P36578, P18077, Q8IY37, Q96EU6, P42677, P62266, P84098, Q9NW13, P15880, Q02543, P62263, P62241, P62701, P62841, P46776, Q9NXF1, P05387, P27635, P46778, P62249	40	236	195	10946	12.5	9.51412	2.79561e-28	3.25335e-27	2.11793e-24	7.21268e-26	5.29482e-25	4.44082e-23	6.49672e-25
Reactome_NSP6 S106-108del	DAVID Reactome	R-HSA-72312~rRNA processing	720011482	Q9Y3U8, Q8IY81, P18124, P42766, Q9UGY1, P62277, P50914, P39023, P62899, P62910, P40429, P83731, Q99848, P62753, P56182, Q07020, Q9UNQ2, P46087, P26373, Q13601, P36578, P18077, Q8IY37, Q96EU6, P42677, P62266, P84098, Q9NW13, P15880, Q02543, P62263, P62241, P62701, P62841, P46776, Q9NXF1, P05387, P27635, P46778, P62249	40	236	205	10946	12.5	9.05002	2.15368e-27	2.35532e-26	1.53331e-23	1.66695e-24	3.06663e-24	2.57201e-22	4.70342e-24
Reactome_NSP6 S106-108del	DAVID Reactome	R-HSA-6791226~Major pathway of rRNA processing in the nucleolus and cytosol	720011341	Q9Y3U8, Q8IY81, P18124, P42766, Q9UGY1, P62277, P50914, P39023, P62899, P62910, P40429, P83731, Q99848, P62753, P56182, Q07020, P26373, Q13601, P36578, P18077, Q8IY37, Q96EU6, P42677, P62266, P84098, Q9NW13, P15880, Q02543, P62263, P62241, P62701, P62841, P46776, Q9NXF1, P05387, P27635, P46778, P62249	38	236	185	10946	11.875	9.52698	6.61425e-27	7.70763e-26	5.01767e-23	5.11943e-24	8.36278e-24	7.01394e-22	1.53916e-23
Reactome_NSP6 S106-108del	DAVID Reactome	R-HSA-192823~Viral mRNA Translation	720010210	Q9Y3U8, P18124, P42766, P62277, P50914, P39023, P62899, P62910, P40429, P83731, P62753, Q07020, P26373, P36578, P18077, P42677, P62266, P84098, P15880, Q02543, P62263, P62241, P62701, P62841, P46776, P05387, P27635, P46778, P62249	29	236	90	10946	9.0625	14.9451	8.401e-27	1.78343e-25	1.16101e-22	1.51722e-23	1.45126e-23	1.21719e-21	3.56138e-23
Reactome_NSP6 S106-108del	DAVID Reactome	R-HSA-156902~Peptide chain elongation	720009921	Q9Y3U8, P18124, P42766, P62277, P50914, P39023, P62899, P62910, P40429, P83731, P62753, Q07020, P26373, P36578, P18077, P42677, P62266, P84098, P15880, Q02543, P62263, P62241, P62701, P62841, P46776, P05387, P27635, P46778, P62249	29	236	90	10946	9.0625	14.9451	8.401e-27	1.78343e-25	1.16101e-22	1.51722e-23	1.45126e-23	1.21719e-21	3.56138e-23
Reactome_NSP6 S106-108del	DAVID Reactome	R-HSA-2408557~Selenocysteine synthesis	720010427	Q9Y3U8, P18124, P42766, P62277, P50914, P39023, P62899, P62910, P40429, P83731, P62753, Q07020, P26373, P36578, P18077, P42677, P62266, P84098, P15880, Q02543, P62263, P62241, P62701, P62841, P46776, P05387, P27635, P46778, P62249	29	236	94	10946	9.0625	14.3091	3.50346e-26	6.98665e-25	4.54831e-22	7.23113e-23	4.13482e-23	3.46792e-21	1.39519e-22
Reactome_NSP6 S106-108del	DAVID Reactome	R-HSA-156842~Eukaryotic Translation Elongation	720009920	Q9Y3U8, P18124, P42766, P62277, P50914, P39023, P62899, P62910, P40429, P83731, P62753, Q07020, P26373, P36578, P18077, P42677, P62266, P84098, P15880, Q02543, P62263, P62241, P62701, P62841, P46776, P05387, P27635, P46778, P62249	29	236	94	10946	9.0625	14.3091	3.50346e-26	6.98665e-25	4.54831e-22	7.23113e-23	4.13482e-23	3.46792e-21	1.39519e-22
Reactome_NSP6 S106-108del	DAVID Reactome	R-HSA-72764~Eukaryotic Translation Termination	720011492	Q9Y3U8, P18124, P42766, P62277, P50914, P39023, P62899, P62910, P40429, P83731, P62753, Q07020, P26373, P36578, P18077, P42677, P62266, P84098, P15880, Q02543, P62263, P62241, P62701, P62841, P46776, P05387, P27635, P46778, P62249	29	236	94	10946	9.0625	14.3091	3.50346e-26	6.98665e-25	4.54831e-22	7.23113e-23	4.13482e-23	3.46792e-21	1.39519e-22
Reactome_NSP6 S106-108del	DAVID Reactome	R-HSA-975956~Nonsense Mediated Decay (NMD) independent of the Exon Junction Complex (EJC)	720012258	Q9Y3U8, P18124, P42766, P62277, P50914, P39023, P62899, P62910, P40429, P83731, P62753, Q07020, P26373, P36578, P18077, P42677, P62266, P84098, P15880, Q02543, P62263, P62241, P62701, P62841, P46776, P05387, P27635, P46778, P62249	29	236	96	10946	9.0625	14.011	6.95254e-26	1.34571e-24	8.76056e-22	8.96878e-23	7.30047e-23	6.12297e-21	2.68729e-22
Reactome_NSP6 S106-108del	DAVID Reactome	R-HSA-72689~Formation of a pool of free 40S subunits	720011486	Q9Y3U8, P18124, P42766, P62277, P50914, P39023, P62899, P62910, P40429, P83731, P62753, Q07020, P26373, P36578, P18077, P42677, P62266, P84098, P15880, Q02543, P62263, P62241, P62701, P62841, P46776, P05387, P27635, P46778, P62249	29	236	102	10946	9.0625	13.1869	4.89917e-25	8.71379e-24	5.67268e-21	5.05595e-22	4.05191e-22	3.39838e-20	1.74009e-21
Reactome_NSP6 S106-108del	DAVID Reactome	R-HSA-9633012~Response of EIF2AK4 (GCN2) to amino acid deficiency	720011951	Q9Y3U8, P18124, P42766, P62277, P50914, P39023, P62899, P62910, P40429, P83731, P62753, Q07020, P26373, P36578, P18077, P42677, P62266, P84098, P15880, Q02543, P62263, P62241, P62701, P62841, P46776, P05387, P27635, P46778, P62249	29	236	102	10946	9.0625	13.1869	4.89917e-25	8.71379e-24	5.67268e-21	5.05595e-22	4.05191e-22	3.39838e-20	1.74009e-21
Reactome_NSP6 S106-108del	DAVID Reactome	R-HSA-72737~Cap-dependent Translation Initiation	720011491	Q9Y3U8, P18124, P42766, P62277, P50914, P39023, P62899, P62910, P40429, P83731, P62753, Q07020, P26373, P36578, P18077, P42677, P62266, P84098, P15880, Q02543, P62263, P62241, P62701, Q9UI10, P62841, P46776, P05387, P27635, P46778, P62249	30	236	120	10946	9.375	11.5953	4.70883e-24	7.04549e-23	4.58661e-20	3.64464e-21	2.86663e-21	2.40427e-19	1.40694e-20
Reactome_NSP6 S106-108del	DAVID Reactome	R-HSA-72613~Eukaryotic Translation Initiation	720011483	Q9Y3U8, P18124, P42766, P62277, P50914, P39023, P62899, P62910, P40429, P83731, P62753, Q07020, P26373, P36578, P18077, P42677, P62266, P84098, P15880, Q02543, P62263, P62241, P62701, Q9UI10, P62841, P46776, P05387, P27635, P46778, P62249	30	236	120	10946	9.375	11.5953	4.70883e-24	7.04549e-23	4.58661e-20	3.64464e-21	2.86663e-21	2.40427e-19	1.40694e-20
Reactome_NSP6 S106-108del	DAVID Reactome	R-HSA-156827~L13a-mediated translational silencing of Ceruloplasmin expression	720009919	Q9Y3U8, P18124, P42766, P62277, P50914, P39023, P62899, P62910, P40429, P83731, P62753, Q07020, P26373, P36578, P18077, P42677, P62266, P84098, P15880, Q02543, P62263, P62241, P62701, P62841, P46776, P05387, P27635, P46778, P62249	29	236	112	10946	9.0625	12.0095	9.40008e-24	1.47288e-22	9.58847e-20	9.70089e-21	5.64028e-21	4.73056e-19	2.94125e-20
Reactome_NSP6 S106-108del	DAVID Reactome	R-HSA-72706~GTP hydrolysis and joining of the 60S ribosomal subunit	720011489	Q9Y3U8, P18124, P42766, P62277, P50914, P39023, P62899, P62910, P40429, P83731, P62753, Q07020, P26373, P36578, P18077, P42677, P62266, P84098, P15880, Q02543, P62263, P62241, P62701, P62841, P46776, P05387, P27635, P46778, P62249	29	236	113	10946	9.0625	11.9032	1.24037e-23	1.92066e-22	1.25035e-19	2.56013e-20	6.94638e-21	5.82599e-19	3.83542e-20
Reactome_NSP6 S106-108del	DAVID Reactome	R-HSA-975957~Nonsense Mediated Decay (NMD) enhanced by the Exon Junction Complex (EJC)	720012259	Q9Y3U8, P18124, P42766, P62277, P50914, P39023, P62899, P62910, P40429, P83731, P62753, Q07020, P26373, P36578, P18077, P42677, P62266, P84098, P15880, Q02543, P62263, P62241, P62701, P62841, P46776, P05387, P27635, P46778, P62249	29	236	116	10946	9.0625	11.5953	2.79922e-23	4.18669e-22	2.72554e-19	3.611e-20	1.36277e-20	1.14297e-18	8.36054e-20
Reactome_NSP6 S106-108del	DAVID Reactome	R-HSA-927802~Nonsense-Mediated Decay (NMD)	720011890	Q9Y3U8, P18124, P42766, P62277, P50914, P39023, P62899, P62910, P40429, P83731, P62753, Q07020, P26373, P36578, P18077, P42677, P62266, P84098, P15880, Q02543, P62263, P62241, P62701, P62841, P46776, P05387, P27635, P46778, P62249	29	236	116	10946	9.0625	11.5953	2.79922e-23	4.18669e-22	2.72554e-19	3.611e-20	1.36277e-20	1.14297e-18	8.36054e-20
Reactome_NSP6 S106-108del	DAVID Reactome	R-HSA-2408522~Selenoamino acid metabolism	720010424	Q9Y3U8, P18124, P42766, P62277, P50914, P39023, P62899, P62910, P40429, P83731, P62753, Q07020, P26373, P36578, P18077, P42677, P62266, P84098, P15880, Q02543, P62263, P62241, P62701, P62841, P46776, P05387, P27635, P46778, P62249	29	236	119	10946	9.0625	11.303	6.15731e-23	8.90565e-22	5.79758e-19	4.76576e-20	2.76075e-20	2.31547e-18	1.7784e-19
Reactome_NSP6 S106-108del	DAVID Reactome	R-HSA-72766~Translation	720011493	Q9Y3U8, Q9Y5M8, P18124, P42766, P62277, P08240, P50914, P39023, P62899, P62910, P40429, P83731, P61009, P62753, Q07020, P82914, P04843, P26373, P36578, P18077, Q15629, P42677, O76094, P62266, Q9Y3B7, P84098, P43307, P15880, Q02543, P62263, P62241, P62701, Q9UI10, P62841, P46776, P05387, P27635, P46778, P62249	39	236	292	10946	12.1875	6.19477	1.80918e-20	1.26076e-19	8.20754e-17	4.6677e-18	3.7307e-18	3.12897e-16	2.51765e-17
Reactome_NSP6 S106-108del	DAVID Reactome	R-HSA-9711097~Cellular response to starvation	720012189	Q9Y3U8, Q16864, P18124, P42766, P62277, P50914, P39023, P62899, P62910, P40429, P83731, P62753, Q07020, P26373, P36578, P18077, P42677, P62266, P84098, P15880, Q02543, P62263, P62241, P62701, P62841, P46776, P05387, P27635, P46778, P62249	30	236	157	10946	9.375	8.86268	1.99783e-20	2.12514e-19	1.38347e-16	1.03088e-17	6.01507e-18	5.0449e-16	4.24376e-17
Reactome_NSP6 S106-108del	DAVID Reactome	R-HSA-9010553~Regulation of expression of SLITs and ROBOs	720011775	Q9Y3U8, P18124, P42766, P62277, P50914, P39023, P62899, P62910, P40429, P83731, P62753, Q07020, P26373, P36578, P18077, P42677, P62266, P84098, P15880, Q02543, P62263, P62241, P62701, P62841, P46776, P05387, P27635, P46778, P62249	29	236	172	10946	9.0625	7.82011	3.25878e-18	2.97857e-17	1.93905e-14	8.40764e-16	8.07938e-16	6.77625e-14	5.94801e-15
Reactome_NSP6 S106-108del	DAVID Reactome	R-HSA-376176~Signaling by ROBO receptors	720010607	Q9Y3U8, P18124, P42766, P62277, P50914, P39023, P62899, P62910, P40429, P83731, P62753, Q07020, P26373, P36578, P18077, P42677, P62266, P84098, P15880, Q02543, P62263, P62241, P62701, P62841, P46776, P05387, P27635, P46778, P62249	29	236	219	10946	9.0625	6.14182	2.86362e-15	1.99916e-14	1.30096e-11	7.44738e-13	5.2058e-13	4.36616e-11	3.9857e-12
Reactome_NSP6 S106-108del	DAVID Reactome	R-HSA-8953854~Metabolism of RNA	720011712	Q9Y3U8, O43592, Q5VV42, P18124, Q9NV66, Q9UGY1, P62277, P39023, P62910, P83731, P62753, Q99848, Q9NRG9, Q16637, Q07020, Q13601, P36578, O75694, P84098, Q9NW13, P62241, P46776, P05387, P62841, P27635, P46778, P62249, Q8IY81, Q9BTX1, Q8TEM1, P42766, P50914, P62899, P40429, P56182, Q8NFH5, Q9UNQ2, P46087, P26373, P18077, Q8N1F7, Q8IY37, Q96EU6, P42677, P62266, P15880, Q02543, P62263, P62701, Q9NXF1	51	236	716	10946	15.9375	3.3037	1.45577e-14	5.07348e-14	3.30299e-11	3.75233e-12	1.27032e-12	1.06543e-10	1.01363e-11
Reactome_NSP6 S106-108del	DAVID Reactome	R-HSA-2262752~Cellular responses to stress	720010418	P53004, Q9Y3U8, Q16864, Q9Y5M8, P18124, P62277, P08240, P42704, P39023, P62910, P83731, P62753, Q9NRG9, Q07020, P36578, O75694, P18850, Q9Y4L1, P84098, P43307, P62241, P30519, P46776, P05387, P62841, P27635, P27797, P46778, P62249, Q9BTX1, Q8TEM1, P42766, P50914, P62899, P40429, Q8NFH5, Q86WX3, P26373, P18077, Q8N1F7, Q8TCT9, P42677, P62266, P15880, Q02543, P62263, P62701, P04350, O14653, Q9NZJ5	50	236	789	10946	15.625	2.93925	2.47826e-12	7.65875e-12	4.98585e-09	6.39386e-10	1.84661e-10	1.54877e-08	1.5294e-09
Reactome_NSP6 S106-108del	DAVID Reactome	R-HSA-8953897~Cellular responses to stimuli	720011713	P53004, Q9Y3U8, Q16864, Q9Y5M8, P18124, P62277, P08240, P42704, P39023, P62910, P83731, P62753, Q9NRG9, Q07020, P36578, O75694, P18850, Q9Y4L1, P84098, P43307, P62241, P30519, P46776, P05387, P62841, P27635, P27797, P46778, P62249, Q9BTX1, Q8TEM1, P42766, P50914, P62899, P40429, Q8NFH5, Q86WX3, P26373, P18077, Q8N1F7, Q8TCT9, P42677, P62266, P15880, Q02543, P62263, P62701, P04350, O14653, Q9NZJ5	50	236	803	10946	15.625	2.888	4.77647e-12	1.44897e-11	9.43282e-09	1.23234e-09	3.36886e-10	2.82549e-08	2.89351e-09
Reactome_NSP6 S106-108del	DAVID Reactome	R-HSA-5663205~Infectious disease	720011233	Q9Y3U8, P04439, P18124, P51149, P62277, P39023, P62910, Q14571, P83731, P27824, P62753, Q9NRG9, Q14573, Q16637, Q07020, P78536, P04843, P36578, O75694, P10321, Q86WV6, P84098, P54709, P62241, P05023, P46776, P05387, P62841, P27635, P27797, P46977, P46778, P62249, Q9BTX1, Q8TEM1, P12236, P42766, O60503, P50914, P62899, P40429, Q8NFH5, P05556, P26373, P18077, Q8N1F7, O00410, P42677, P62266, P15880,…	55	236	960	10946	17.1875	2.65727	8.87527e-12	2.46486e-11	1.60462e-08	2.28981e-09	5.53319e-10	4.64074e-08	4.92216e-09
Reactome_NSP6 S106-108del	DAVID Reactome	R-HSA-9012999~RHO GTPase cycle	720011779	Q8N5G2, Q96NT0, O95292, P51648, O95210, P51149, Q8NHP6, Q86Y07, Q02413, O15498, P02786, Q5T8D3, Q9NRG9, Q92974, Q96CS3, O15173, Q07065, P05556, Q96HY6, P49257, O75976, Q9H8V3, Q9ULK5, Q15904, Q08378, Q07960, Q86UP2, P84095, Q9P0I2, Q96DH6, Q5JTV8, Q13190, Q86XL3, P30519, Q8TAA9, Q9BSJ8	36	236	449	10946	11.25	3.71877	6.60879e-12	2.62931e-11	1.71168e-08	1.70508e-09	5.7056e-10	4.78535e-08	5.25056e-09
Reactome_NSP6 S106-108del	DAVID Reactome	R-HSA-9013408~RHOG GTPase cycle	720011788	O15173, P05556, P49257, O95292, O95210, Q07960, P51149, Q86UP2, P84095, Q86Y07, Q86XL3, Q13190, Q8TAA9, O15498, Q9BSJ8, P02786	16	236	74	10946	5	10.0284	2.90538e-12	3.59769e-11	2.3421e-08	6.74621e-09	7.55515e-10	6.33658e-08	7.18434e-09
Reactome_NSP6 S106-108del	DAVID Reactome	R-HSA-8980692~RHOA GTPase cycle	720011748	O15173, Q96CS3, Q96HY6, P49257, Q9H8V3, Q8N5G2, Q96NT0, O95292, Q15904, O95210, Q07960, Q86UP2, Q9P0I2, Q13190, Q8TAA9, P30519, O15498, P02786, Q5T8D3, Q9NRG9, Q92974	21	236	147	10946	6.5625	6.62591	5.3725e-12	4.0612e-11	2.64385e-08	1.3861e-09	8.26201e-10	6.92943e-08	8.10996e-09
Reactome_NSP6 S106-108del	DAVID Reactome	R-HSA-392499~Metabolism of proteins	720010689	Q9Y3U8, P04439, P18085, O75787, Q9Y5M8, P18124, P51148, P51149, P62277, P08240, P39023, P62910, P83731, Q9Y2T2, P27824, P62753, Q9NRG9, Q07020, Q07065, P82914, P04843, P51151, P49257, Q9Y673, Q8WUD1, Q9NP72, Q5JRA6, P36578, Q86VP6, O75694, Q15629, O60858, Q9Y3B7, P84098, P43307, P62241, Q9UI10, P46776, P05387, P62841, P27635, P27797, P46977, P46778, P62249, Q14789, Q9BTX1, Q8TEM1, P78527, P30101,…	80	236	1970	10946	25	1.88351	2.43294e-09	4.71245e-09	3.0678e-06	6.27698e-07	9.29637e-08	7.79696e-06	9.41044e-07
Reactome_NSP6 S106-108del	DAVID Reactome	R-HSA-9716542~Signaling by Rho GTPases, Miro GTPases and RHOBTB3	720012192	P05109, Q8N5G2, Q96NT0, O95292, P51648, O95210, Q8IXI1, P51149, Q8NHP6, Q86Y07, Q02413, O15498, P02786, Q5T8D3, Q9NRG9, Q92974, Q96CS3, O15173, Q07065, P05556, P06702, Q96HY6, P51151, P49257, O75976, Q9H8V3, Q9ULK5, Q15904, Q08378, Q07960, Q86UP2, P42677, P84095, Q9P0I2, Q96DH6, Q5JTV8, Q13190, Q86XL3, P30519, Q8TAA9, P04350, Q9BSJ8	42	236	723	10946	13.125	2.69435	2.77228e-09	7.83229e-09	5.09881e-06	7.15247e-07	1.47006e-07	1.23296e-05	1.56405e-06
Reactome_NSP6 S106-108del	DAVID Reactome	R-HSA-9754678~SARS-CoV-2 modulates host translation machinery	720012238	P42677, Q16637, P62266, P62277, P15880, P62263, P62241, P62701, P62841, P62753, P62249	12	236	51	10946	3.75	10.9133	5.76219e-10	7.90357e-09	5.14521e-06	1.48664e-06	1.47006e-07	1.23296e-05	1.57829e-06
Reactome_NSP6 S106-108del	DAVID Reactome	R-HSA-71291~Metabolism of amino acids and derivatives	720011466	Q9Y3U8, P18124, P42766, P62277, P50914, P39023, P62899, P62910, P40429, P83731, P62753, Q07020, P26373, P36578, P18077, P42677, P62266, P84098, P15880, Q02543, P62263, P62241, P62701, P62841, P46776, P05387, P27635, P46778, P62249	29	236	376	10946	9.0625	3.57729	2.22007e-09	8.46238e-09	5.50899e-06	5.72778e-07	1.53028e-07	1.28346e-05	1.68988e-06
Reactome_NSP6 S106-108del	DAVID Reactome	R-HSA-9705683~SARS-CoV-2-host interactions	720012173	Q16637, P04439, Q8TEM1, Q9BTX1, Q8N1F7, O75694, P10321, Q86WV6, P42677, P62266, P62277, P15880, P62263, P62241, P62701, P62841, P62753, Q9NRG9, Q8NFH5, P62249	21	236	203	10946	6.5625	4.79807	2.48887e-09	1.30985e-08	8.52711e-06	6.42128e-07	2.30463e-07	1.93292e-05	2.61569e-06
Reactome_NSP6 S106-108del	DAVID Reactome	R-HSA-194315~Signaling by Rho GTPases	720010232	P05109, Q8N5G2, Q96NT0, O95292, P51648, O95210, P51149, Q8NHP6, Q86Y07, Q02413, O15498, P02786, Q5T8D3, Q9NRG9, Q92974, Q96CS3, O15173, Q07065, P05556, P06702, Q96HY6, P49257, O75976, Q9H8V3, Q9ULK5, Q15904, Q08378, Q07960, Q86UP2, P42677, P84095, Q9P0I2, Q96DH6, Q5JTV8, Q13190, Q86XL3, P30519, Q8TAA9, P04350, Q9BSJ8	40	236	707	10946	12.5	2.62412	1.48655e-08	4.08805e-08	2.66128e-05	3.83529e-06	7.00347e-07	5.87388e-05	8.16356e-06
Reactome_NSP6 S106-108del	DAVID Reactome	R-HSA-9735869~SARS-CoV-1 modulates host translation machinery	720012221	P42677, P62266, P62277, P15880, P62263, P62241, P62701, P62841, P62753, P62249	10	236	37	10946	3.125	12.5355	3.75181e-09	6.12776e-08	3.9891e-05	1.64553e-05	1.02287e-06	8.57887e-05	1.22367e-05
Reactome_NSP6 S106-108del	DAVID Reactome	R-HSA-9694516~SARS-CoV-2 Infection	720012126	Q16637, P04843, P04439, Q8TEM1, Q9BTX1, Q8N1F7, O75694, P10321, Q86WV6, P42677, P62266, P62277, P15880, P62263, P62241, P62701, P27824, P62841, P62753, Q9NRG9, P46977, Q8NFH5, P62249	24	236	299	10946	7.5	3.72292	2.76521e-08	1.10509e-07	7.1939e-05	1.42684e-05	1.79854e-06	0.000150845	2.2068e-05
Reactome_NSP6 S106-108del	DAVID Reactome	R-HSA-9013405~RHOD GTPase cycle	720011785	O15173, P49257, Q8NHP6, Q86Y07, Q5JTV8, Q8TAA9, O95292, Q9BSJ8, O95210, Q07960, P51149	11	236	54	10946	3.4375	9.44805	1.56854e-08	1.79641e-07	0.00011694	4.45143e-05	2.85235e-06	0.00023923	3.58732e-05
Reactome_NSP6 S106-108del	DAVID Reactome	R-HSA-422475~Axon guidance	720010756	Q9Y3U8, P18124, P42766, P62277, P50914, P39023, P62899, P62910, P40429, P83731, P62753, Q07020, P05556, P26373, P36578, P18077, P42677, P62266, P84098, P15880, Q02543, P62263, P62241, P62701, P04350, P62841, P46776, P05387, P27635, Q9H2E6, P46778, P62249	32	236	553	10946	10	2.68391	2.99667e-07	8.48079e-07	0.000551947	7.7311e-05	1.30397e-05	0.00109365	0.000169356
Reactome_NSP6 S106-108del	DAVID Reactome	R-HSA-9679506~SARS-CoV Infections	720012097	P04439, Q9BTX1, Q8TEM1, P62277, P27824, P62753, Q9NRG9, Q8NFH5, Q16637, P05556, P04843, Q8N1F7, O75694, Q86WV6, P10321, P42677, P62266, P15880, P54709, P62263, P62241, P62701, P05023, P62841, P46977, P62249	27	236	414	10946	8.4375	3.02487	2.69205e-07	8.61303e-07	0.000560551	6.94525e-05	1.30397e-05	0.00109365	0.000171996
Reactome_NSP6 S106-108del	DAVID Reactome	R-HSA-1430728~Metabolism	720009866	P53004, Q9Y3U8, P48651, Q15738, A0FGR8, O75027, O95470, Q8IV08, P18124, P35613, Q86T03, P62277, P42704, P39023, P62910, Q14571, P83731, P62753, Q5T8D3, Q9NRG9, Q14573, Q07020, O95168, P48047, Q9UI09, P04406, P36578, O75694, Q8IY17, Q7LGA3, Q5K4L6, P84098, Q15392, P62241, P30519, Q7L5N7, Q9BSJ8, P46776, P05387, P62841, P27635, P46778, P62249, Q9BTX1, Q8TEM1, O95292, P51648, O00763, Q53EU6, P16435,…	77	236	2118	10946	24.0625	1.6862	7.06006e-07	1.22241e-06	0.000795472	0.000182133	1.80861e-05	0.0015169	0.000244107
Reactome_NSP6 S106-108del	DAVID Reactome	R-HSA-72695~Formation of the ternary complex, and subsequently, the 43S complex	720011487	P42677, P62266, P62277, P15880, P62263, P62241, P62701, P62841, P62753, P62249	10	236	52	10946	3.125	8.91949	1.28311e-07	1.36909e-06	0.000890881	0.00049644	1.98062e-05	0.00166116	0.000273398
Reactome_NSP6 S106-108del	DAVID Reactome	R-HSA-6811442~Intra-Golgi and retrograde Golgi-to-ER traffic	720011395	A2RRP1, P11717, Q9H2M9, P51151, Q9NP72, P18085, Q14807, Q9P2W9, O75396, Q9NZ43, Q13190, P04350, Q15042, O15498, O14653, P20340, P62820, Q8TBA6	18	236	202	10946	5.625	4.13299	3.52333e-07	1.575e-06	0.0010248	9.08979e-05	2.22897e-05	0.00186946	0.000314517
Reactome_NSP6 S106-108del	DAVID Reactome	R-HSA-9675108~Nervous system development	720012086	Q9Y3U8, P18124, P42766, P62277, P50914, P39023, P62899, P62910, P40429, P83731, P62753, Q07020, P05556, P26373, P36578, P18077, P42677, P62266, P84098, P15880, Q02543, P62263, P62241, P62701, P04350, P62841, P46776, P05387, P27635, Q9H2E6, P46778, P62249	32	236	578	10946	10	2.56783	8.01496e-07	2.16191e-06	0.00140642	0.000206765	2.99448e-05	0.0025115	0.000431719
Reactome_NSP6 S106-108del	DAVID Reactome	R-HSA-9013404~RAC2 GTPase cycle	720011784	O15173, P05556, P49257, Q86Y07, Q86XL3, Q8TAA9, O95292, Q9BSJ8, O95210, P02786, Q07960, P51149	12	236	88	10946	3.75	6.32473	3.68401e-07	2.64061e-06	0.00171756	0.000570122	3.58133e-05	0.0030037	0.000527312
Reactome_NSP6 S106-108del	DAVID Reactome	R-HSA-9696270~RND2 GTPase cycle	720012138	Q07065, Q02413, Q8TAA9, Q9ULK5, P51648, Q08378, P02786, Q07960, Q86UP2	9	236	43	10946	2.8125	9.70773	2.57397e-07	3.03711e-06	0.00197521	0.0013936	3.99965e-05	0.00335454	0.000606488
Reactome_NSP6 S106-108del	DAVID Reactome	R-HSA-1643685~Disease	720009979	Q9Y3U8, P04439, P18124, P35613, P51149, P62277, P39023, P62910, Q14571, P83731, P27824, P62753, Q9NRG9, O94905, Q14573, Q16637, Q07020, P06702, P78536, P04843, P36578, O75694, P10321, Q86WV6, P84095, P84098, P54709, P62241, P05023, P46776, P05387, P62841, P27635, P27797, P46977, P46778, P62249, P05109, Q14789, Q9BTX1, Q8TEM1, P12236, O00400, P42766, O60503, P50914, P62899, P40429, Q8NFH5, P05556,…	66	236	1748	10946	20.625	1.75124	1.70338e-06	3.07192e-06	0.00199783	0.000439375	3.99965e-05	0.00335454	0.000613442
Reactome_NSP6 S106-108del	DAVID Reactome	R-HSA-72702~Ribosomal scanning and start codon recognition	720011488	P42677, P62266, P62277, P15880, P62263, P62241, P62701, P62841, P62753, P62249	10	236	59	10946	3.125	7.86125	4.46461e-07	4.10332e-06	0.0026677	0.00184129	5.13704e-05	0.00430848	0.000819403
Reactome_NSP6 S106-108del	DAVID Reactome	R-HSA-72649~Translation initiation complex formation	720011484	P42677, P62266, P62277, P15880, P62263, P62241, P62701, P62841, P62753, P62249	10	236	59	10946	3.125	7.86125	4.46461e-07	4.10332e-06	0.0026677	0.00184129	5.13704e-05	0.00430848	0.000819403
Reactome_NSP6 S106-108del	DAVID Reactome	R-HSA-72662~Activation of the mRNA upon binding of the cap-binding complex and eIFs, and subsequent binding to 43S	720011485	P42677, P62266, P62277, P15880, P62263, P62241, P62701, P62841, P62753, P62249	10	236	60	10946	3.125	7.73023	5.25732e-07	4.73821e-06	0.00307983	0.00108452	5.81995e-05	0.00488125	0.000946187
Reactome_NSP6 S106-108del	DAVID Reactome	R-HSA-9013423~RAC3 GTPase cycle	720011794	O15173, P05556, P49257, Q86Y07, Q8TAA9, O15498, Q9BSJ8, O95210, P02786, Q07960, P51149	11	236	94	10946	3.4375	5.42761	5.29825e-06	3.20343e-05	0.0206387	0.010876	0.000386191	0.0323902	0.00639693
Reactome_NSP6 S106-108del	DAVID Reactome	R-HSA-9692914~SARS-CoV-1-host interactions	720012119	P42677, P62266, P62277, P15880, P62263, P62241, P62701, P62841, P62753, Q86WV6, P62249	11	236	96	10946	3.4375	5.31453	6.51605e-06	3.84972e-05	0.0247507	0.0083705	0.000455667	0.0382172	0.00768748
Reactome_NSP6 S106-108del	DAVID Reactome	R-HSA-8873719~RAB geranylgeranylation	720011646	P26374, Q8WUD1, P51151, Q9NP72, P20340, P51148, P62820, O14966, P51149	9	236	65	10946	2.8125	6.42203	9.65876e-06	7.04102e-05	0.0448039	0.0148406	0.000818518	0.0686499	0.0140599
Reactome_NSP6 S106-108del	DAVID Reactome	R-HSA-176033~Interactions of Vpr with host cellular proteins	720010112	Q8TEM1, Q9BTX1, P12236, Q8N1F7, O75694, Q9NRG9, Q8NFH5	7	236	36	10946	2.1875	9.0186	9.70267e-06	0.000104297	0.065647	0.0368533	0.00119118	0.0999056	0.0208263
Reactome_NSP6 S106-108del	DAVID Reactome	R-HSA-194441~Metabolism of non-coding RNA	720010233	Q16637, Q8TEM1, Q9BTX1, Q8N1F7, O75694, Q9NRG9, Q8NFH5	8	236	53	10946	2.5	7.00096	1.59116e-05	0.000127787	0.0798282	0.0203169	0.00140999	0.118257	0.0255167
Reactome_NSP6 S106-108del	DAVID Reactome	R-HSA-191859~snRNP Assembly	720010206	Q16637, Q8TEM1, Q9BTX1, Q8N1F7, O75694, Q9NRG9, Q8NFH5	8	236	53	10946	2.5	7.00096	1.59116e-05	0.000127787	0.0798282	0.0203169	0.00140999	0.118257	0.0255167
Reactome_NSP6 S106-108del	DAVID Reactome	R-HSA-8856688~Golgi-to-ER retrograde transport	720011624	A2RRP1, Q9H2M9, Q9NZ43, Q9NP72, P18085, Q14807, Q15042, P04350, P20340, Q9P2W9, O75396, P62820	12	236	133	10946	3.75	4.18478	2.92604e-05	0.000133454	0.0832169	0.00752086	0.00144798	0.121443	0.0266481
Reactome_NSP6 S106-108del	DAVID Reactome	R-HSA-9678108~SARS-CoV-1 Infection	720012093	P42677, P62266, P62277, P15880, P62263, P62241, P62701, P27824, P62841, P62753, Q86WV6, P62249	12	236	142	10946	3.75	3.91955	5.59579e-05	0.000238105	0.143606	0.0561143	0.00254109	0.213123	0.0475423
Reactome_NSP6 S106-108del	DAVID Reactome	R-HSA-5653656~Vesicle-mediated transport	720011168	Q9H2M9, P18085, Q14789, Q14807, P51148, P51149, Q9NZ43, Q15042, O15498, P02786, A2RRP1, P11717, P26374, P51151, P49257, O15155, O75976, Q9NP72, Q5JRA6, Q9H3P7, Q9P2W9, O75396, Q9Y4L1, Q13190, P04350, O14653, P20340, Q8TBA6, P62820, P27797	30	236	673	10946	9.375	2.06752	0.000117519	0.000254372	0.15263	0.0298665	0.00267091	0.224012	0.05079
Reactome_NSP6 S106-108del	DAVID Reactome	R-HSA-6798695~Neutrophil degranulation	720011351	P11717, Q96CS3, Q07065, P06702, P05109, Q9NP72, P04439, O75787, Q86VP6, P51148, O95210, P10321, P51149, Q86WV6, P84095, Q8NF37, Q9NZT1, Q93050, Q8NHP6, Q5T9A4, Q02413, P30519, P20340, O14975	24	236	482	10946	7.5	2.30945	0.000113457	0.00027715	0.165106	0.0288493	0.00286389	0.240197	0.0553374
Reactome_NSP6 S106-108del	DAVID Reactome	R-HSA-446203~Asparagine N-linked glycosylation	720010831	P04843, O15155, Q9Y673, P49257, P18085, Q14789, Q5JRA6, O60858, P30101, O75396, Q13190, P04350, O15498, O14653, P27824, P62820, P27797, P46977	18	236	304	10946	5.625	2.74626	0.000102032	0.000297954	0.17634	0.0259821	0.00303076	0.254192	0.0594907
Reactome_NSP6 S106-108del	DAVID Reactome	R-HSA-6790901~rRNA modification in the nucleus and cytosol	720011339	Q9UNQ2, P15880, P46087, P62263, Q13601, Q8IY37, P62753, Q96EU6	8	236	61	10946	2.5	6.0828	4.5578e-05	0.00031271	0.184216	0.100427	0.00313191	0.262676	0.0624363
Reactome_NSP6 S106-108del	DAVID Reactome	R-HSA-168271~Transport of Ribonucleoproteins into the Host Nucleus	720010049	Q8TEM1, Q9BTX1, Q8N1F7, O75694, Q9NRG9, Q8NFH5	6	236	31	10946	1.875	8.97704	4.41642e-05	0.000470592	0.263928	0.264831	0.00443994	0.372382	0.0939521
Reactome_NSP6 S106-108del	DAVID Reactome	R-HSA-168333~NEP/NS2 Interacts with the Cellular Export Machinery	720010064	Q8TEM1, Q9BTX1, Q8N1F7, O75694, Q9NRG9, Q8NFH5	6	236	31	10946	1.875	8.97704	4.41642e-05	0.000470592	0.263928	0.264831	0.00443994	0.372382	0.0939521
Reactome_NSP6 S106-108del	DAVID Reactome	R-HSA-5619107~Defective TPR may confer susceptibility towards thyroid papillary carcinoma (TPC)	720011118	Q8TEM1, Q9BTX1, Q8N1F7, O75694, Q9NRG9, Q8NFH5	6	236	31	10946	1.875	8.97704	4.41642e-05	0.000470592	0.263928	0.264831	0.00443994	0.372382	0.0939521
Reactome_NSP6 S106-108del	DAVID Reactome	R-HSA-170822~Regulation of Glucokinase by Glucokinase Regulatory Protein	720010080	Q8TEM1, Q9BTX1, Q8N1F7, O75694, Q9NRG9, Q8NFH5	6	236	31	10946	1.875	8.97704	4.41642e-05	0.000470592	0.263928	0.264831	0.00443994	0.372382	0.0939521
Reactome_NSP6 S106-108del	DAVID Reactome	R-HSA-199991~Membrane Trafficking	720010272	Q9H2M9, P18085, Q14789, Q14807, P51148, P51149, Q9NZ43, Q15042, O15498, P02786, A2RRP1, P11717, P26374, P51151, P49257, O15155, O75976, Q9NP72, Q5JRA6, Q9H3P7, Q9P2W9, O75396, Q13190, P04350, O14653, P20340, Q8TBA6, P62820	28	236	634	10946	8.75	2.04839	0.000234918	0.000504565	0.280037	0.0588155	0.00469246	0.393561	0.100733
Reactome_NSP6 S106-108del	DAVID Reactome	R-HSA-168274~Export of Viral Ribonucleoproteins from Nucleus	720010051	Q8TEM1, Q9BTX1, Q8N1F7, O75694, Q9NRG9, Q8NFH5	6	236	33	10946	1.875	8.43297	6.40814e-05	0.000634781	0.338585	0.327535	0.00566085	0.474781	0.126721
Reactome_NSP6 S106-108del	DAVID Reactome	R-HSA-180746~Nuclear import of Rev protein	720010140	Q8TEM1, Q9BTX1, Q8N1F7, O75694, Q9NRG9, Q8NFH5	6	236	33	10946	1.875	8.43297	6.40814e-05	0.000634781	0.338585	0.327535	0.00566085	0.474781	0.126721
Reactome_NSP6 S106-108del	DAVID Reactome	R-HSA-180910~Vpr-mediated nuclear import of PICs	720010143	Q8TEM1, Q9BTX1, Q8N1F7, O75694, Q9NRG9, Q8NFH5	6	236	33	10946	1.875	8.43297	6.40814e-05	0.000634781	0.338585	0.327535	0.00566085	0.474781	0.126721
Reactome_NSP6 S106-108del	DAVID Reactome	R-HSA-8876198~RAB GEFs exchange GTP for GDP on RABs	720011655	P26374, Q9H2M9, P51151, Q9NP72, Q15042, P20340, P51148, P62820, P51149	9	236	90	10946	2.8125	4.63814	0.000133754	0.000682916	0.359003	0.214611	0.00600781	0.503881	0.136327
Reactome_NSP6 S106-108del	DAVID Reactome	R-HSA-165054~Rev-mediated nuclear export of HIV RNA	720009990	Q8TEM1, Q9BTX1, Q8N1F7, O75694, Q9NRG9, Q8NFH5	6	236	34	10946	1.875	8.18495	7.64232e-05	0.000731356	0.378915	0.284808	0.00618328	0.518598	0.145994
Reactome_NSP6 S106-108del	DAVID Reactome	R-HSA-4085377~SUMOylation of SUMOylation proteins	720010718	Q8TEM1, Q9BTX1, Q8N1F7, O75694, Q9NRG9, Q8NFH5	6	236	34	10946	1.875	8.18495	7.64232e-05	0.000731356	0.378915	0.284808	0.00618328	0.518598	0.145994
Reactome_NSP6 S106-108del	DAVID Reactome	R-HSA-159227~Transport of the SLBP independent Mature mRNA	720009927	Q8TEM1, Q9BTX1, Q8N1F7, O75694, Q9NRG9, Q8NFH5	6	236	34	10946	1.875	8.18495	7.64232e-05	0.000731356	0.378915	0.284808	0.00618328	0.518598	0.145994
Reactome_NSP6 S106-108del	DAVID Reactome	R-HSA-2980766~Nuclear Envelope Breakdown	720010486	Q86Y07, Q8TEM1, Q9BTX1, Q8N1F7, O75694, Q9NRG9, Q8NFH5	7	236	52	10946	2.1875	6.24364	0.000115979	0.000818906	0.41335	0.361649	0.0068233	0.572277	0.163463
Reactome_NSP6 S106-108del	DAVID Reactome	R-HSA-159230~Transport of the SLBP Dependant Mature mRNA	720009928	Q8TEM1, Q9BTX1, Q8N1F7, O75694, Q9NRG9, Q8NFH5	6	236	35	10946	1.875	7.95109	9.05878e-05	0.000838501	0.420792	0.262025	0.0068233	0.572277	0.167373
Reactome_NSP6 S106-108del	DAVID Reactome	R-HSA-3301854~Nuclear Pore Complex (NPC) Disassembly	720010529	Q8TEM1, Q9BTX1, Q8N1F7, O75694, Q9NRG9, Q8NFH5	6	236	35	10946	1.875	7.95109	9.05878e-05	0.000838501	0.420792	0.262025	0.0068233	0.572277	0.167373
Reactome_NSP6 S106-108del	DAVID Reactome	R-HSA-177243~Interactions of Rev with host cellular proteins	720010125	Q8TEM1, Q9BTX1, Q8N1F7, O75694, Q9NRG9, Q8NFH5	6	236	36	10946	1.875	7.73023	0.000106765	0.000956921	0.463803	0.338471	0.00769081	0.645035	0.190999
Reactome_NSP6 S106-108del	DAVID Reactome	R-HSA-9013106~RHOC GTPase cycle	720011781	P49257, Q13190, Q8N5G2, Q8TAA9, O95292, P02786, Q07960, Q5T8D3	8	236	74	10946	2.5	5.0142	0.000183394	0.00101905	0.485079	0.346806	0.00809028	0.678539	0.203394
Reactome_NSP6 S106-108del	DAVID Reactome	R-HSA-5619102~SLC transporter disorders	720011116	Q8TEM1, Q9BTX1, Q8N1F7, O75694, O00400, P35613, Q9NRG9, Q8NFH5, Q6P1M0	9	236	98	10946	2.8125	4.25951	0.000256754	0.00119746	0.5416	0.180247	0.00939211	0.787725	0.238982
Reactome_NSP6 S106-108del	DAVID Reactome	R-HSA-5578775~Ion homeostasis	720011004	Q12797, Q13586, P54709, Q14571, P16615, P05023, Q14573	7	236	56	10946	2.1875	5.79767	0.000186877	0.0012162	0.547165	0.352067	0.00942398	0.790398	0.242719
Reactome_NSP6 S106-108del	DAVID Reactome	R-HSA-3232142~SUMOylation of ubiquitinylation proteins	720010516	Q8TEM1, Q9BTX1, Q8N1F7, O75694, Q9NRG9, Q8NFH5	6	236	38	10946	1.875	7.32337	0.00014597	0.00123047	0.551359	0.472851	0.00942398	0.790398	0.245566
Reactome_NSP6 S106-108del	DAVID Reactome	R-HSA-6784531~tRNA processing in the nucleus	720011332	O43592, Q8TEM1, Q9BTX1, Q8N1F7, O75694, Q9NRG9, Q8NFH5	7	236	57	10946	2.1875	5.69596	0.000209183	0.00133531	0.580992	0.38478	0.0101079	0.847763	0.266474
Reactome_NSP6 S106-108del	DAVID Reactome	R-HSA-917937~Iron uptake and transport	720011887	Q93050, Q16864, Q9Y487, P30519, Q86VP6, Q15904, P02786	7	236	58	10946	2.1875	5.59775	0.00023359	0.00146312	0.61449	0.4847	0.0109482	0.918233	0.291962
Reactome_NSP6 S106-108del	DAVID Reactome	R-HSA-168276~NS1 Mediated Effects on Host Pathways	720010053	Q8TEM1, Q9BTX1, Q8N1F7, O75694, Q9NRG9, Q8NFH5	6	236	40	10946	1.875	6.9572	0.000195781	0.0015579	0.637592	0.426318	0.0115249	0.966607	0.310861
Reactome_NSP6 S106-108del	DAVID Reactome	R-HSA-159231~Transport of Mature mRNA Derived from an Intronless Transcript	720009929	Q8TEM1, Q9BTX1, Q8N1F7, O75694, Q9NRG9, Q8NFH5	6	236	41	10946	1.875	6.78752	0.000225256	0.0017437	0.678945	0.530269	0.0127545	1.06973	0.347903
Reactome_NSP6 S106-108del	DAVID Reactome	R-HSA-199977~ER to Golgi Anterograde Transport	720010271	O15155, P49257, P18085, Q14789, Q5JRA6, Q13190, O15498, P04350, O14653, O75396, P62820	11	236	154	10946	3.4375	3.31295	0.000496482	0.00177529	0.68549	0.319122	0.0128413	1.07701	0.3542
Reactome_NSP6 S106-108del	DAVID Reactome	R-HSA-9696264~RND3 GTPase cycle	720012137	Q07065, O75976, Q02413, Q8TAA9, Q9ULK5, Q86UP2	6	236	42	10946	1.875	6.62591	0.000258118	0.00194525	0.718491	0.606408	0.0137647	1.15446	0.388076
Reactome_NSP6 S106-108del	DAVID Reactome	R-HSA-159234~Transport of Mature mRNAs Derived from Intronless Transcripts	720009930	Q8TEM1, Q9BTX1, Q8N1F7, O75694, Q9NRG9, Q8NFH5	6	236	42	10946	1.875	6.62591	0.000258118	0.00194525	0.718491	0.606408	0.0137647	1.15446	0.388076
Reactome_NSP6 S106-108del	DAVID Reactome	R-HSA-72306~tRNA processing	720011481	Q9NV66, O43592, Q8TEM1, Q9BTX1, Q5VV42, Q8N1F7, O75694, Q9NRG9, Q8NFH5	9	236	107	10946	2.8125	3.90124	0.00049479	0.00210408	0.746197	0.318229	0.0147286	1.2353	0.41973
Reactome_NSP6 S106-108del	DAVID Reactome	R-HSA-168325~Viral Messenger RNA Synthesis	720010062	Q8TEM1, Q9BTX1, Q8N1F7, O75694, Q9NRG9, Q8NFH5	6	236	43	10946	1.875	6.47182	0.000294633	0.00216331	0.755818	0.797407	0.0149821	1.25656	0.431532
Reactome_NSP6 S106-108del	DAVID Reactome	R-HSA-4615885~SUMOylation of DNA replication proteins	720010877	Q8TEM1, Q9BTX1, Q8N1F7, O75694, Q9NRG9, Q8NFH5	6	236	45	10946	1.875	6.18418	0.000379753	0.00265209	0.822504	0.543405	0.0181738	1.52426	0.528905
Reactome_NSP6 S106-108del	DAVID Reactome	R-HSA-4570464~SUMOylation of RNA binding proteins	720010874	Q8TEM1, Q9BTX1, Q8N1F7, O75694, Q9NRG9, Q8NFH5	6	236	47	10946	1.875	5.92102	0.000482977	0.0032163	0.877199	0.943112	0.0216462	1.81548	0.641244
Reactome_NSP6 S106-108del	DAVID Reactome	R-HSA-983170~Antigen Presentation: Folding, assembly and peptide loading of class I MHC	720012287	P04439, P27824, P30101, P27797, P10321	5	236	29	10946	1.5625	7.99679	0.00034734	0.00322531	0.877919	0.883644	0.0216462	1.81548	0.643037
Reactome_NSP6 S106-108del	DAVID Reactome	R-HSA-204005~COPII-mediated vesicle transport	720010313	O15155, P49257, Q13190, O15498, O14653, O75396, P62820	7	236	68	10946	2.1875	4.77455	0.000627623	0.00331305	0.884719	0.802057	0.0220081	1.84584	0.660502
Reactome_NSP6 S106-108del	DAVID Reactome	R-HSA-68875~Mitotic Prophase	720011403	Q86Y07, Q9NTJ3, Q8TEM1, Q9BTX1, Q9H8Y8, Q8N1F7, O75694, P62820, Q9NRG9, Q8NFH5	10	236	142	10946	3.125	3.26629	0.000992268	0.00350384	0.898227	0.641034	0.0230404	1.93242	0.698472
Reactome_NSP6 S106-108del	DAVID Reactome	R-HSA-3371453~Regulation of HSF1-mediated heat shock response	720010551	Q86WX3, Q8TEM1, Q9BTX1, Q8N1F7, O75694, Q9NRG9, Q8NFH5	7	236	69	10946	2.1875	4.70535	0.000685884	0.00356488	0.902205	0.587325	0.0232074	1.94643	0.710618
Reactome_NSP6 S106-108del	DAVID Reactome	R-HSA-77387~Insulin receptor recycling	720011576	Q93050, Q16864, Q9Y487, P18031, Q15904	5	236	30	10946	1.5625	7.73023	0.000409555	0.00365972	0.908081	0.850784	0.0235889	1.97842	0.729489
Reactome_NSP6 S106-108del	DAVID Reactome	R-HSA-381119~Unfolded Protein Response (UPR)	720010634	P43307, P08240, Q9Y5M8, O14653, P18850, Q9Y4L1, P27797, Q9NZJ5	8	236	94	10946	2.5	3.94735	0.000936803	0.00404073	0.928341	0.855499	0.0257893	2.16298	0.805281
Reactome_NSP6 S106-108del	DAVID Reactome	R-HSA-70171~Glycolysis	720011450	P04406, Q8TEM1, Q9BTX1, Q8N1F7, O75694, Q9NRG9, Q8NFH5	7	236	71	10946	2.1875	4.57281	0.000815234	0.00411088	0.931553	0.569007	0.0258659	2.1694	0.819232
Reactome_NSP6 S106-108del	DAVID Reactome	R-HSA-917977~Transferrin endocytosis and recycling	720011888	Q93050, Q16864, Q9Y487, Q15904, P02786	5	236	31	10946	1.5625	7.48086	0.000479822	0.00413219	0.9325	0.964678	0.0258659	2.1694	0.82347
Reactome_NSP6 S106-108del	DAVID Reactome	R-HSA-5694530~Cargo concentration in the ER	720011305	P49257, Q5JRA6, Q13190, O14653, O75396	5	236	33	10946	1.5625	7.02748	0.000647134	0.00519722	0.966366	0.981837	0.0320219	2.68571	1.03516
Reactome_NSP6 S106-108del	DAVID Reactome	R-HSA-9007101~Rab regulation of trafficking	720011769	P26374, Q9H2M9, P51151, Q9NP72, Q15042, P20340, P51148, P62820, P51149	9	236	124	10946	2.8125	3.36639	0.00142824	0.00521402	0.966734	0.669203	0.0320219	2.68571	1.0385
Reactome_NSP6 S106-108del	DAVID Reactome	R-HSA-6811434~COPI-dependent Golgi-to-ER retrograde traffic	720011391	A2RRP1, Q9NZ43, P18085, Q14807, P04350, Q9P2W9, O75396, P62820	8	236	99	10946	2.5	3.74799	0.00131427	0.0053719	0.969999	0.742624	0.0324604	2.72248	1.06986
Reactome_NSP6 S106-108del	DAVID Reactome	R-HSA-2995410~Nuclear Envelope (NE) Reassembly	720010490	Q86Y07, Q86XL3, Q9BTX1, Q8N1F7, P04350, O75694, Q8NFH5	7	236	75	10946	2.1875	4.32893	0.00113138	0.00538513	0.970258	0.689088	0.0324604	2.72248	1.07249
Reactome_NSP6 S106-108del	DAVID Reactome	R-HSA-9705671~SARS-CoV-2 activates/modulates innate and adaptive immune responses	720012171	P04439, Q8TEM1, Q9BTX1, Q8N1F7, O75694, Q9NRG9, Q8NFH5, P10321, Q86WV6	9	236	126	10946	2.8125	3.31295	0.00159715	0.00573592	0.976361	0.561673	0.0342577	2.87322	1.14215
Reactome_NSP6 S106-108del	DAVID Reactome	R-HSA-6807878~COPI-mediated anterograde transport	720011388	O15155, P18085, Q14789, Q13190, O15498, P04350, O14653, P62820	8	236	101	10946	2.5	3.67377	0.00149548	0.00598757	0.979952	0.538026	0.0354355	2.97201	1.19211
Reactome_NSP6 S106-108del	DAVID Reactome	R-HSA-948021~Transport to the Golgi and subsequent modification	720011903	O15155, P49257, P18085, Q14789, Q5JRA6, Q13190, O15498, P04350, O14653, O75396, P62820	11	236	185	10946	3.4375	2.75781	0.00221608	0.00658557	0.98645	0.820423	0.0386235	3.23939	1.31078
Reactome_NSP6 S106-108del	DAVID Reactome	R-HSA-432722~Golgi Associated Vesicle Biogenesis	720010796	P11717, O75976, Q14789, Q9H3P7, P51148, P02786	6	236	56	10946	1.875	4.96943	0.00124305	0.00685562	0.988648	0.944321	0.0398483	3.34211	1.36434
Reactome_NSP6 WT	DAVID Reactome	R-HSA-1428517~The citric acid (TCA) cycle and respiratory electron transport	720009865	Q15118, P31930, O75947, P08559, O75964, P13804, P10515, P50213, O43837, P35613, Q9UDW1, P25705, P24539, P18859, P42704, P31040, P22695, P20674, Q13423, P10606, P53597, P14927, Q9UI09, Q12931, O95182, P11177, O95563, P21912, P47985, P21796, P06576	31	367	178	10946	6.54008	5.19435	2.76949e-14	1.68074e-13	1.82879e-10	7.13229e-12	1.82864e-10	1.66057e-08	3.35842e-11
Reactome_NSP6 WT	DAVID Reactome	R-HSA-199991~Membrane Trafficking	720010272	Q9H2M9, Q9NP61, P18085, Q12907, P51148, P51149, P61020, Q9H0U4, Q99961, P61026, P61106, Q13885, Q9UIQ6, O95487, Q9Y678, P49257, Q9NP72, O75976, Q5JRA6, Q15907, Q01082, Q9P2W9, Q8IWJ2, O00159, Q8WUX9, P36383, Q9UM54, O15020, Q13813, Q14789, Q9Y6I3, Q9Y4I1, Q9UHD9, Q9NZ43, Q00610, P61006, P49755, Q6NUQ1, Q15042, O15498, Q9BVK6, P02786, Q10471, Q99747, Q14671, A2RRP1, P11717, O94973, P53992, Q15643,…	59	367	634	10946	12.4473	2.77557	4.80864e-13	1.43113e-12	1.55701e-09	1.24056e-10	6.02267e-10	5.46911e-08	2.85949e-10
Reactome_NSP6 WT	DAVID Reactome	R-HSA-5653656~Vesicle-mediated transport	720011168	Q9H2M9, Q9NP61, P18085, Q12907, P51148, P51149, P61020, Q9H0U4, Q99961, P61026, P61106, Q13885, Q9UIQ6, O95487, Q9Y678, P49257, Q9NP72, O75976, Q5JRA6, Q15907, Q01082, Q9P2W9, Q9Y4L1, Q8IWJ2, O00159, Q8WUX9, P36383, Q9UM54, P27797, O15020, Q13813, Q14789, Q9Y6I3, Q9Y4I1, Q9UHD9, Q9NZ43, Q00610, P61006, P49755, Q6NUQ1, Q15042, O15498, Q9BVK6, P02786, Q10471, Q99747, Q14671, A2RRP1, P11717, O94973,…	61	367	673	10946	12.8692	2.70336	5.82134e-13	1.68443e-12	1.83266e-09	1.50179e-10	6.02267e-10	5.46911e-08	3.36575e-10
Reactome_NSP6 WT	DAVID Reactome	R-HSA-9012999~RHO GTPase cycle	720011779	Q9NYL9, Q14126, Q13813, Q9NP61, P12814, Q96NT0, O95210, P51149, Q8NHP6, Q86Y07, Q00610, O15498, P61586, Q9BX68, P02786, Q5T8D3, Q9NRG9, Q93008, P80723, Q96CS3, O15173, P05556, Q96HY6, P49257, O75976, Q15904, Q01082, Q08378, Q07960, P34897, Q8N6H7, Q86UP2, P84095, Q9P0I2, Q96DH6, P20700, Q9HD26, P41240, Q5JTV8, Q86XL3, Q8TAA9, Q16643, Q9UM54, Q14344, Q9BSJ8, P67936, P08238, P06753	48	367	449	10946	10.1266	3.18848	6.36484e-13	2.21422e-12	2.40908e-09	1.64215e-10	6.02267e-10	5.46911e-08	4.42435e-10
Reactome_NSP6 WT	DAVID Reactome	R-HSA-1430728~Metabolism	720009866	O75947, P08559, P10515, P30085, Q01650, Q8IV08, O43837, P50897, Q00796, P11172, Q9UDW1, Q9P2J5, Q9UJS0, P22695, P83731, P00387, Q9NRG9, P22059, P20674, Q8TD30, Q8TC12, P04406, Q9UI09, O00154, Q14738, P11177, O95563, P13995, P19623, Q5K4L6, P47985, Q9BSJ8, P00374, P46778, Q9Y2Q3, Q8TEM1, O95573, Q53GQ0, P16435, P25705, P18859, P04181, P31040, Q15165, P23921, P45954, Q8NFH5, P54886, Q9NXE4, Q13423,…	126	367	2118	10946	26.5823	1.77433	4.30834e-12	7.90266e-12	8.59811e-09	1.11155e-09	1.71962e-09	1.56157e-07	1.57908e-09
Reactome_NSP6 WT	DAVID Reactome	R-HSA-9716542~Signaling by Rho GTPases, Miro GTPases and RHOBTB3	720012192	Q9NYL9, Q14126, Q9NP61, P12814, Q8IXI1, P51149, P35580, P61586, Q5T8D3, Q9NRG9, Q96CS3, O15173, Q13885, Q96HY6, P49257, O75976, Q14738, Q15904, Q01082, P84095, Q96DH6, Q7Z460, Q9HD26, P41240, Q5JTV8, Q86XL3, Q8TAA9, Q9GZM8, Q16643, Q9UM54, Q14344, Q9BSJ8, P67936, P06753, Q13813, Q96NT0, O95210, Q7Z406, Q8NHP6, Q86Y07, P23528, Q9NZQ3, Q00610, O15498, Q9BX68, P02786, Q93008, P80723, P05556, P36873,…	59	367	723	10946	12.4473	2.4339	1.12526e-10	2.89761e-10	3.1526e-07	2.90318e-08	5.25434e-08	4.7714e-06	5.78991e-08
Reactome_NSP6 WT	DAVID Reactome	R-HSA-194315~Signaling by Rho GTPases	720010232	Q9NYL9, Q14126, Q9NP61, P12814, P51149, P35580, P61586, Q5T8D3, Q9NRG9, Q96CS3, O15173, Q13885, Q96HY6, P49257, O75976, Q14738, Q15904, Q01082, P84095, Q96DH6, Q7Z460, Q9HD26, P41240, Q5JTV8, Q86XL3, Q8TAA9, Q9GZM8, Q16643, Q9UM54, Q14344, Q9BSJ8, P67936, P06753, Q13813, Q96NT0, O95210, Q7Z406, Q8NHP6, Q86Y07, P23528, Q9NZQ3, Q00610, O15498, Q9BX68, P02786, Q93008, P80723, P05556, P36873, Q08378,…	58	367	707	10946	12.2363	2.4468	1.36727e-10	3.54691e-10	3.85904e-07	3.52755e-08	5.51292e-08	5.00621e-06	7.08731e-08
Reactome_NSP6 WT	DAVID Reactome	R-HSA-446203~Asparagine N-linked glycosylation	720010831	O15020, Q13813, Q9NP61, P18085, Q14789, Q04323, Q12907, P14314, Q9H0U4, P49755, O15498, P27824, Q9BVK6, Q99747, Q13885, P53992, O95487, Q14697, Q9Y678, P04843, P49257, Q5JRA6, Q01082, O60858, Q06210, O75396, O75352, P54920, Q8N6H7, P04350, Q9UKV5, P62820, P27797, P46977, Q14165	35	367	304	10946	7.38397	3.43387	1.41417e-10	5.37307e-10	5.8459e-07	3.64857e-08	7.30738e-08	6.63575e-06	1.07363e-07
Reactome_NSP6 WT	DAVID Reactome	R-HSA-9013408~RHOG GTPase cycle	720011788	O15173, P05556, Q14126, P49257, Q9NP61, O95210, Q07960, P51149, P34897, Q86UP2, P84095, Q86Y07, Q86XL3, Q8TAA9, O15498, Q9BSJ8, P02786	17	367	74	10946	3.5865	6.85183	2.37017e-10	2.02071e-09	2.19853e-06	5.50353e-07	2.44281e-07	2.21829e-05	4.0377e-07
Reactome_NSP6 WT	DAVID Reactome	R-HSA-8856688~Golgi-to-ER retrograde transport	720011624	A2RRP1, Q13885, Q9Y678, Q9H2M9, Q9NP61, Q9NP72, P18085, Q9P2W9, O75396, P54920, Q8N6H7, Q9H0U4, Q9NZ43, P49755, P04350, Q6NUQ1, Q15042, P20340, Q9BVK6, P62820, Q99747, Q10471	22	367	133	10946	4.64135	4.93356	4.83254e-10	2.76437e-09	3.00763e-06	1.2468e-07	3.00764e-07	2.7312e-05	5.52367e-07
Reactome_NSP6 WT	DAVID Reactome	R-HSA-6811442~Intra-Golgi and retrograde Golgi-to-ER traffic	720011395	Q9H2M9, Q9NP61, P18085, Q9H0U4, Q9NZ43, P49755, Q6NUQ1, Q15042, O15498, Q9BVK6, Q99747, Q10471, A2RRP1, P11717, Q13885, Q9Y678, Q15643, Q9NP72, Q9P2W9, O75396, Q8IWJ2, P54920, Q8N6H7, P04350, P20340, Q8TBA6, P62820	27	367	202	10946	5.6962	3.98659	7.31646e-10	3.3029e-09	3.59355e-06	1.88765e-07	3.26687e-07	2.96661e-05	6.59974e-07
Reactome_NSP6 WT	DAVID Reactome	R-HSA-199977~ER to Golgi Anterograde Transport	720010271	Q13885, O15020, P53992, O95487, Q9Y678, Q13813, P49257, Q9NP61, P18085, Q14789, Q5JRA6, Q01082, Q12907, O75396, P54920, Q8N6H7, Q9H0U4, P49755, P04350, O15498, Q9BVK6, P62820, Q99747	23	367	154	10946	4.85232	4.45447	1.55464e-09	7.89517e-09	8.58991e-06	1.20329e-06	7.15829e-07	6.50036e-05	1.57758e-06
Reactome_NSP6 WT	DAVID Reactome	R-HSA-9013405~RHOD GTPase cycle	720011785	O15173, P49257, P12814, O95210, Q07960, P51149, P20700, Q8NHP6, Q5JTV8, Q86Y07, Q8TAA9, Q9BX68, Q16643, Q9BSJ8	14	367	54	10946	2.95359	7.73257	1.7007e-09	1.69004e-08	1.83875e-05	4.82657e-06	1.41443e-06	0.000128443	3.37697e-06
Reactome_NSP6 WT	DAVID Reactome	R-HSA-9609507~Protein localization	720011913	Q3ZCQ8, Q9Y2Q3, O96008, Q8NBU5, Q9Y5L4, O43765, P11441, P12235, O00116, Q9NX63, Q9NS69, Q9Y3D6, P25705, O94826, O60220, Q9UJS0, Q5T8D3, P10809, Q93008, P21796, Q13011, Q9HAV7, P06576	23	367	163	10946	4.85232	4.20852	4.81266e-09	2.28991e-08	2.49139e-05	2.48333e-06	1.77959e-06	0.000161602	4.57561e-06
Reactome_NSP6 WT	DAVID Reactome	R-HSA-163200~Respiratory electron transport, ATP synthesis by chemiosmotic coupling, and heat production by uncoupling proteins.	720009961	O75947, P10606, P31930, O75964, P13804, P14927, Q9UI09, Q12931, O95182, P21912, Q9UDW1, P25705, P24539, P18859, P42704, P31040, P22695, P47985, P20674, P06576	20	367	127	10946	4.21941	4.69695	7.29596e-09	3.94125e-08	4.28799e-05	1.88236e-06	2.85872e-06	0.000259597	7.87526e-06
Reactome_NSP6 WT	DAVID Reactome	R-HSA-1268020~Mitochondrial protein import	720009814	Q3ZCQ8, O96008, Q9Y5L4, P12235, Q9NX63, Q9NS69, P25705, O94826, O60220, Q9UJS0, P10809, P21796, Q9HAV7, P06576	14	367	64	10946	2.95359	6.52435	1.84837e-08	1.47952e-07	0.000160959	3.81497e-05	1.00607e-05	0.000913603	2.95632e-05
Reactome_NSP6 WT	DAVID Reactome	R-HSA-6811434~COPI-dependent Golgi-to-ER retrograde traffic	720011391	A2RRP1, Q13885, Q9Y678, Q9NP61, P18085, Q9P2W9, O75396, P54920, Q8N6H7, Q9H0U4, Q9NZ43, P49755, P04350, Q6NUQ1, Q9BVK6, P62820, Q99747	17	367	99	10946	3.5865	5.12157	2.64855e-08	1.5835e-07	0.00017227	2.73327e-05	1.01344e-05	0.000920293	3.16409e-05
Reactome_NSP6 WT	DAVID Reactome	R-HSA-71406~Pyruvate metabolism and Citric Acid (TCA) cycle	720011471	Q15118, Q13423, P53597, P08559, P10515, P11177, P50213, P35613, O95563, O43837, P21912, P31040, P21796	13	367	55	10946	2.74262	7.04969	2.21775e-08	1.95473e-07	0.000212652	8.01019e-05	1.18153e-05	0.00107293	3.90587e-05
Reactome_NSP6 WT	DAVID Reactome	R-HSA-6807878~COPI-mediated anterograde transport	720011388	Q13885, O15020, Q9Y678, Q13813, Q9NP61, P18085, Q14789, Q01082, P54920, Q8N6H7, Q9H0U4, P49755, P04350, O15498, Q9BVK6, P62820, Q99747	17	367	101	10946	3.5865	5.02015	3.6087e-08	2.10741e-07	0.00022926	1.86207e-05	1.20677e-05	0.00109585	4.21095e-05
Reactome_NSP6 WT	DAVID Reactome	R-HSA-948021~Transport to the Golgi and subsequent modification	720011903	Q13885, O15020, P53992, O95487, Q9Y678, Q13813, P49257, Q9NP61, P18085, Q14789, Q5JRA6, Q01082, Q12907, O75396, P54920, Q8N6H7, Q9H0U4, P49755, P04350, O15498, Q9BVK6, P62820, Q99747	23	367	185	10946	4.85232	3.70805	5.50964e-08	2.27234e-07	0.0002472	4.26437e-05	1.23615e-05	0.00112254	4.54051e-05
Reactome_NSP6 WT	DAVID Reactome	R-HSA-70326~Glucose metabolism	720011454	P14618, P04406, Q16822, Q8TEM1, Q9BTX1, Q8N1F7, O75694, Q14738, P19367, P17858, Q9UJS0, P04075, Q01813, Q9NRG9, Q8NFH5	15	367	91	10946	3.16456	4.91631	3.07973e-07	1.75527e-06	0.00190791	0.000476628	9.09398e-05	0.00825813	0.000350732
Reactome_NSP6 WT	DAVID Reactome	R-HSA-70171~Glycolysis	720011450	P14618, P04406, Q8TEM1, Q9BTX1, Q8N1F7, O75694, Q14738, P19367, P17858, P04075, Q01813, Q9NRG9, Q8NFH5	13	367	71	10946	2.74262	5.46103	5.46059e-07	3.52087e-06	0.00382339	0.000563375	0.000174123	0.0158119	0.000703527
Reactome_NSP6 WT	DAVID Reactome	R-HSA-8873719~RAB geranylgeranylation	720011646	P61020, Q9H0U4, Q9NP72, P61006, Q15907, P61026, P20340, P51148, P62820, P61019, P61106, P51149	12	367	65	10946	2.53165	5.50627	1.36581e-06	8.89072e-06	0.00962651	0.00211204	0.00042057	0.0381914	0.0017765
Reactome_NSP6 WT	DAVID Reactome	R-HSA-176033~Interactions of Vpr with host cellular proteins	720010112	P52294, Q8TEM1, Q9BTX1, P05141, Q8N1F7, O75694, P12235, Q9NRG9, Q8NFH5	9	367	36	10946	1.89873	7.4564	2.04853e-06	1.92677e-05	0.0207453	0.00789648	0.000873471	0.0793189	0.00384997
Reactome_NSP6 WT	DAVID Reactome	R-HSA-6798695~Neutrophil degranulation	720011351	P14618, Q13813, P04439, O75787, O00264, P30041, O95210, P51148, P51149, P61020, Q8NF37, Q8NHP6, Q7Z6Z7, P61026, P61586, P00387, Q4KMQ2, Q9H8H3, P01111, P61106, P11717, Q96CS3, O94973, Q9NP72, P07858, Q86VP6, Q9UHA4, Q86WV6, P84095, Q99536, P17858, P04075, P20340, P08238, Q14165	35	367	482	10946	7.38397	2.16576	1.3254e-05	3.04134e-05	0.0325488	0.00341372	0.00132359	0.120194	0.00607701
Reactome_NSP6 WT	DAVID Reactome	R-HSA-2995410~Nuclear Envelope (NE) Reassembly	720010490	Q8WUX9, Q13885, P20700, Q86Y07, Q86XL3, Q92973, Q9BTX1, Q8N1F7, P04350, O75694, P02545, Q8NFH5	12	367	75	10946	2.53165	4.7721	6.54877e-06	3.60715e-05	0.0384863	0.00673557	0.00149441	0.135706	0.00720754
Reactome_NSP6 WT	DAVID Reactome	R-HSA-611105~Respiratory electron transport	720011314	P10606, P31930, P13804, P14927, Q9UI09, Q12931, O95182, P21912, Q9UDW1, P42704, P31040, P22695, P47985, P20674	14	367	103	10946	2.95359	4.05397	8.10744e-06	3.70855e-05	0.0395466	0.00833201	0.00149441	0.135706	0.00741016
Reactome_NSP6 WT	DAVID Reactome	R-HSA-8949613~Cristae formation	720011702	O75947, P25705, O75964, P24539, P18859, Q16891, P06576, Q9NX63	8	367	31	10946	1.68776	7.69693	5.93339e-06	5.79408e-05	0.0610955	0.0404896	0.00225142	0.204448	0.0115772
Reactome_NSP6 WT	DAVID Reactome	R-HSA-379724~tRNA Aminoacylation	720010617	P54577, Q6PI48, Q9P2J5, Q15181, P41250, P47897, Q12904, Q9NSE4, Q9Y2Z4	9	367	42	10946	1.89873	6.3912	8.11968e-06	6.30644e-05	0.066315	0.0289025	0.002366	0.214854	0.0126009
Reactome_NSP6 WT	DAVID Reactome	R-HSA-204005~COPII-mediated vesicle transport	720010313	P53992, Q9H0U4, O95487, P49257, P49755, O15498, Q12907, O75396, P62820, Q99747, P54920	11	367	68	10946	2.32068	4.82473	1.428e-05	7.96641e-05	0.0830277	0.0361721	0.00288915	0.26236	0.0159176
Reactome_NSP6 WT	DAVID Reactome	R-HSA-8980692~RHOA GTPase cycle	720011748	O15173, Q96CS3, Q96HY6, P49257, Q96NT0, Q15904, O95210, Q07960, Q86UP2, Q9P0I2, Q8TAA9, O15498, P61586, P02786, Q5T8D3, Q9NRG9	16	367	147	10946	3.37553	3.24633	3.27089e-05	0.000116976	0.11951	0.00840353	0.00410547	0.372813	0.0233723
[truncated: 3,313 more rows]

## Sheet: KEGG
Bait	categoryName	termName	id	geneIds	listHits	listTotals	popHits	popTotals	percent	foldEnrichment	fisher	ease	bonferroni	EASEBonferroni	benjamini	afdr	rfdr
[truncated: 792 more rows]

## Sheet: CC
Bait	categoryName	termName	id	geneIds	listHits	listTotals	popHits	popTotals	percent	foldEnrichment	fisher	ease	bonferroni	EASEBonferroni	benjamini	afdr	rfdr
[truncated: 3,153 more rows]

[truncated: 2 more sheets: BP, MF]
