# Supplementary material for: The comprehensive SARS-CoV-2 ‘hijackome’ knowledge base— reveals significant changes in host cell protein expression and activation by multiple SARS-CoV-2 variants
Source: Research Square preprint supplement (doi:10.21203/rs.3.rs-4322477/v1), 2024-05-10
Supplement: Supplementary file 6 [file f175e301bf7bb64f4586e295.xlsx]

## Sheet: Info
	EV01 Total proteome data
	Sheet:	Description
	Total Proteome:Raw_DATA	Raw Total proteome data used for figure 2 A and B images
	312 proteins from 2 A	Subsection of the supervenn data, unique proteins seen only in VOCs
	312 Proteins from 2 A Reactome	Enriched Reactome pathways from 312 protein subsection seen in supervenn
	2 C 49 Proteomic analysis	Subsection of 49 Proteins Significant compared to Mock (P>0.05, log2Foldchange ±1), background removed from previous timepoint. Seen in Figure 2 C
	2 D DAVID ALL	DAVID enrichment to all variants, Significantly expressed proteins compared to Mock (P>0.05, log2Foldchange ±1) at 36hpi timepoint. Seen in Figure 2 D
	DAVID ALPHA	DAVID enrichment to Alpha, Significantly expressed proteins compared to Mock (P>0.05, log2Foldchange ±1) at 36hpi timepoint,
	DAVID BETA	DAVID enrichment to Beta, Significantly expressed proteins compared to Mock (P>0.05, log2Foldchange ±1) at 36hpi timepoint,
	DAVID DELTA	DAVID enrichment to Delta, Significantly expressed proteins compared to Mock (P>0.05, log2Foldchange ±1) at 36hpi timepoint,
	DAVID BA.1	DAVID enrichment to Omicron BA.5, Significantly expressed proteins compared to Mock (P>0.05, log2Foldchange ±1) at 36hpi timepoint,
	DAVID BA.5	DAVID enrichment to Omicron BA.1, Significantly expressed proteins compared to Mock (P>0.05, log2Foldchange ±1) at 36hpi timepoint,
	UniprotID to function	UniprotID connected to Reactome terms
	Sig. 36h vs mock from rawdata	Significantly expressed proteins compared to Mock (P>0.05, log2Foldchange ±1) at 36hpi timepoint

## Sheet: Total proteome_Raw_DATA
Protein.Group	Protein.Ids	Protein.Names	Genes	First.Protein.Description	Beta_1hpi_R1	Beta_1hpi_R2	Beta_1hpi_R3	Beta_8hpi_R1	Beta_8hpi_R2	Beta_8hpi_R3	Beta_16hpi_R1	Beta_16hpi_R2	Beta_16hpi_R3	Beta_24hpi_R1	Beta_24hpi_R2	Beta_24hpi_R3	Beta_36hpi_R1	Beta_36hpi_R2	Beta_36hpi_R3	Alphpia_1hpi_R1	Alphpia_1hpi_R2	Alphpia_1hpi_R3	Alphpia_8hpi_R1	Alphpia_8hpi_R2	Alphpia_8hpi_R3	Alphpia_16hpi_R1	Alphpia_16hpi_R2	Alphpia_16hpi_R3	Alphpia_24hpi_R1	Alphpia_24hpi_R2	Alphpia_24hpi_R3	Alphpia_36hpi_R1	Alphpia_36hpi_R2	Alphpia_36hpi_R3	Delta_1hpi_R1	Delta_1hpi_R2	Delta_1hpi_R3	Delta_8hpi_R1	Delta_8hpi_R2	Delta_8hpi_R3	Delta_16hpi_R1	Delta_16hpi_R2	Delta_16hpi_R3	Delta_24hpi_R1	Delta_24hpi_R2	Delta_24hpi_R3	Delta_36hpi_R1	Delta_36hpi_R2	Delta_36hpi_R3
A0A0D9QUG7;A0A1U9GGK8;A6YJW2;Q1AL71	A0A0D9QUG7;A0A1U9GGK8;A6YJW2;Q1AL71	A0A0D9QUG7_CHLSB;A0A1U9GGK8_CHLSB;A6YJW2_CHLSB;Q1AL71_CHLSB	ATP8										1146.16																											4074.99			1462.3		5211.25	3156.18
A0A0D9QUG7;A6YJW2;Q1AL71	A0A0D9QUG7;A6YJW2;Q1AL71	A0A0D9QUG7_CHLSB;A6YJW2_CHLSB;Q1AL71_CHLSB	ATP8		3523.26		5325.37		4348.4	6202.42	5086.5	4787.54	4242.04	5173.71		3488.41	5017.8	7383.02	4910.2	6093.97	4940.67	6289.99	5647.83	4969.93	5071.27	4330.42	4811.7	5719.74	4296.05	6101	6158.14	3579.23	4477.01	4669.83	4060.99	6795.51	8665.84	5641.82	4439.15	5357.41	6075.43	6424.92	4148.56	5284.01				4434.25	6280.29
A0A0D9QUH5	A0A0D9QUH5	A0A0D9QUH5_CHLSB			4796.16	3932.2	4872.78	4121.76	4309.9	4435.79	4441.67	3728.25	4989.07	4758.09	3975.82	4087.24	4059.81	3124.42	4441.31	5037.06	4659.06	4594.81	3978.8	3054.82	4715.76	4365.72	3873.91	4659.83	4387.79	4949.4	4415.68	4721.08	4011.33	5105.95	5047	4433.58	5263.27	4524.71	5172.67	4386.28	4836.02	3233.64	4554.41	4717.52	5059.15	5382.48	4650.03	4518.24	4969.03
A0A0D9QUH9	A0A0D9QUH9	A0A0D9QUH9_CHLSB	SNRPA		42309.9	52393.6	44271.3	50514.3	45560.7	48375.1	39744.9	48181	37932.9	35027.5	29050.8	53180.5	38487.8	55414.9	45503	33214.8	32860.7	31980.4	45103.6	39444.3	44771.7	36315.7	41353.9	42568.9	36418.4	44634.4	39643.3	52571.4	24046.2	41229.8	34963.4	28459.3	40114.6	34646	40501.2	38888.2	35775.2	41976.5	33004.2	43756.9	8240.76	29781.9	22289.9	38866.7	35586.6
A0A0D9QUI2	A0A0D9QUI2	A0A0D9QUI2_CHLSB	HIKESHI		7528.03				7176.84	5202.25	6325.21		7636.77	9103.67	9129.08	4749.54	5080.83		4760.89	5161.26	7574.09	4853.65	4967.39		6986.35	6289.21	6016.24	5027.1	6145.37		9538.72	4742.97	4275.53		7415.21	12351.7	5479.79	6267.07	10893.1	8328.01	7733.74	5242.08	7609.8	6140.39	15642.7	10504.9	6880.55	8910.61	5712.74
A0A0D9QUI3	A0A0D9QUI3	A0A0D9QUI3_CHLSB	C19orf54		5789.26	4998.06	5332.4	6836.64	4603.21	4985.92	6610.69	4796.07	5585.58	6189.64	5146.89	5658.86	6267.41	5525.5	5894.99	5978.17	5689.66	6358.12	5229.16	4633.1	5715.97	6287.48	5115.49	6478.44	6385.04	5991.5	7316.92	7560.86	4922.34	6320.48	5925.94	5402.87	5853.95	6405.1	5591.06	6205.62	6022.3	5352.56	5865.22	7110.12	4999.94	5987.41	6390.07	5409.87	6562.79
A0A0D9QUI5	A0A0D9QUI5	A0A0D9QUI5_CHLSB	TERF2IP		7252.11	7882.92	6837.57	7921.98	8045.08	7997.92	6318.04	7880.06	5000.39	4753.86	7915.71	7133.44	5368.02	6253.83	3351.89	8282.34	7229.08	7355.47	7766.48	8478.45	7729.46	7412.83	6945.14	7657.74	5859.97	7030.17	4946.27	7150.04	6067.85	5645.33	8096.07	7587.15	7104.22	7149.13	8583.73	5287.29	7271.78	8107.35	5643.48	7054.02	1697.33	4809.06	7073.25	6377.09	5938.28
A0A0D9QUI6	A0A0D9QUI6	A0A0D9QUI6_CHLSB	NDUFA12		21351	19137.4	19465.4	17937.5	19506.4	23485.2	15856.9	16977.5	17289.3	14751.8	17455.6	14292.1	17736.9	18970.1	17037.7	20367.3	19136	21925.6	19171.6	20005.8	22764.2	16076.3	14644.1	17016.9	16231.2	15136.1	16181.8	17178.1	18131.2	16423	18179.9	21073.7	19223.1	17900.2	18201.1	13903.5	17553.4	18266.4	16949.2	15542.3	11450.3	15486.7	15881.2	18083.3	17125
A0A0D9QUI7	A0A0D9QUI7	A0A0D9QUI7_CHLSB	EED		9751.07	9206.52	9496.63	6857.43	7618.44	8940.58	10334.2	8370.53	11243.7	10293.7	8882.4	7070.68	7299.73	9034.91	8449.95	8097	9559.32	9626.42	10922	5114.14	10687.2	8739.19	9429.99	8186.69	9326.87	9925.47	11157.7	7485.82	9095.05	9264.13	11166.6	10167.8	9624.03	9149.34	9096	10954.6	8962.97	7863.61	9305.24	10449.3	10059.5	12606.5	6016.77	7669.05	9162
A0A0D9QUI8	A0A0D9QUI8	A0A0D9QUI8_CHLSB	NMT1		27946.2	25483.1	29308.4	30465.5	28840.1	28253.3	32045.1	31832.2	30334.6	32003.5	30868.2	31062	33310.2	32750.6	29721.6	31803.9	30992.9	25819.4	30634.1	27238.5	26599	35372.3	31635.8	32693.8	30692.2	27448.6	29012.2	36113.5	31599.9	30385.8	31093.7	32919.3	28921.4	30514.1	32491.9	29668.4	31879.7	30771.5	27565.9	34669.3	24643.4	25889.5	29389.5	30397.3	30104.6
A0A0D9QUI8;A0A0D9RKC4	A0A0D9QUI8;A0A0D9RKC4	A0A0D9QUI8_CHLSB;A0A0D9RKC4_CHLSB	NMT1;NMT2		16352.3	12823.1	13820.4	15890.2	14940	16398.4	13102.5	14226.6	16769.1	16159.2	16394.2	13975.8	17121	15081.9	15216.5	16149.1	14641.5	14374.5	16372.9	12790.1	11525.3	16056.4	13066.6	15459.7	16918.4	16220.8	14271.2	17516.2	15166.1	15627.7	16080.9	12860.4	14236.4	13459.4	15282.3	13547.1	16111.8	16597.6	14099.4	17772.7	6327.7	9715.44	8713.34	15466.6	14125.4
A0A0D9QUJ1	A0A0D9QUJ1	A0A0D9QUJ1_CHLSB	PLCD3		7924.35	10245.9	10368.8	8650.64	8865.67	9119.19	8515.67	8673.38	8297.33	5848.71	9112.21	9005.14	8795.94	10763.6	8737.03	7451.3	9874.49	7897.25	8820.16	9071.47	6724.72	8289.99	9331.61	9347.87	8024.47	8232.32	7663.08	8122.48	9370.49	8339.19	6571.84	10077.9	8525.56	8177.02	8735.87	7382.26	9862.74	12172.3	8326.97	8401.72	4976.98	7705.6	6375.46	9566.21	9306.66
A0A0D9QUJ2	A0A0D9QUJ2	A0A0D9QUJ2_CHLSB	PICALM		94279.8	92615.2	93855.3	101575	97506.6	95313.1	89633.9	80120.9	91391.8	85881.9	102286	84496.6	86319.6	84963	83496.4	97426.1	92375.8	93099.1	86531.3	88627.8	92721.1	89218.3	98969.5	90545.3	80467.1	87277.4	92680.2	86003.8	87413.3	94962.4	98842.7	71019.5	92241.4	96865.2	85799.6	107532	87384	82575	94034.8	91142.8	114817	96634.4	84415.2	90170.6	88512.7
A0A0D9QUJ7	A0A0D9QUJ7	A0A0D9QUJ7_CHLSB	KARS1		37268.4	26557.6	34883.3	36502.9	33799.3	35722.3	37393.9	29350.7	37334.4	40895.6	32627.7	36113.9	39025.9	33926.8	36880.5	36165.1	30532.2	33967.7	36909.5	27456.9	38409.4	39180.8	34887.5	38312.9	41663.3	40045.3	40798.1	42147.9	36745.5	42647.8	38710.6	31203.9	38152.7	40439.6	32168.2	34810.7	40515.7	31335.7	36979.8	40211.2	34063	37860.5	35615.2	34722.2	40656.9
A0A0D9QUJ9	A0A0D9QUJ9	A0A0D9QUJ9_CHLSB	COQ8B		7523.96	7580.59	6591.42	6405.57	5805.6	8460.25	10962.6	6112.98	8111.07	9415.89	6169.45	7121.93	5081.91	5388.99	6579.06	8669.9	5241.56	9035.07	11704	11657.4	10189.1	9718.68	7730.86	9359.55	9364.65	9579.91	9359.36	7457.93	8032.32	7277.73	8132.01	11254.8	9246.41	10261.5	8962.08	10155.3	10851.7	6482.1	11597.8	10923.2	7433.43	9214.67	8554.77	5349.35	6562.11
A0A0D9QUK5	A0A0D9QUK5	A0A0D9QUK5_CHLSB	GABARAPL2		1530.3	3661.08	2752.34	2761.97	2174.25	1995	1051.29	2403.25	1397.18	486.092		1581.92			678.697	1980.96	1588.79	1425.07	2400.49	3562.99	1623.04	1155.88	2571.24	2240.96	1602.82	1438.59	548.197	2064.66	2028.57	2329.77	1726.5	2352.86	1828.54	2023.75	3829.61	1661.3	2494.83	2751.38	1138.92	1785.15			553.225	2004.46	2320.62
A0A0D9QUK6	A0A0D9QUK6	A0A0D9QUK6_CHLSB	ACBD4				2433.08	1419.02	1862.22	1481.68	2226.12	1478.96							2431.44	1511.53	2515.2	2201.43		2095.1																	1092.76	1884.29
A0A0D9QUK8	A0A0D9QUK8	A0A0D9QUK8_CHLSB	HEXIM2		12721.5	7392.66	8298.5	11078.2		9194.52	13230.7	11482.8	10850.7	13154.5	8825.72	8796.1	9922.03	8659.53	9311.97	10948.6	8175.84	10130.1	9548.94	8024.18	10012.9	12583.4	9483.12	11601	11726.8	13839.8	15657.7	12497.6	9905.74	8235.62	9470.39	8023.01	9530.9	12245	8846.6	11225.9	10788.9	7989.65	11545.3	12688.5			11494.7	8090.83	9946.39
A0A0D9QUL2	A0A0D9QUL2	A0A0D9QUL2_CHLSB	LTBP4		1472.81	443.731	429.047	799.414	865.634	852.733	452.627		1053.2		419.165					465.485	879.958	1078.91	952.64	498.454		563.008					695.532		747.054		814.035	875.586	1023.62	876.226	446.787	999.857	781.858	504.09	988.431	700.76		1227.85	466.871
A0A0D9QUL5	A0A0D9QUL5	A0A0D9QUL5_CHLSB	TMEM126A		11970.7	9212.89	12599.6	10534	12413.6	14629.4	19471.7	8232.97	13054.9	11695.9	9848.93	9994.64	14078.8	12170	14861.3	11862.8	13455.2	18919.4	14762.3	9187.16	14802.4	14999.2	11711.8	10933.1	19286.4	11496.2	13158.2	12261.4	14344.6	11991.3	12833.1	21091.5	20455.3	17429.5	12760.4	8740.21	20640.8	16614.1	13811.4	18027.1	11888.8	15021.8	9289.13	14011.3	17447.3
A0A0D9QUL7	A0A0D9QUL7	A0A0D9QUL7_CHLSB	KIAA1109				1802.55	1762.98			2507.37							2298.61							471.088		1416.08		2421.69				1110.67			2004.57	3164.5					1264.13							691.261
A0A0D9QUM0	A0A0D9QUM0	A0A0D9QUM0_CHLSB	CFDP1		21311.9	18870.3	20566.6	24129.7	19234.8	19614.9	21096.7	15075.1	21103.9	21831.7	19045.9	18692.6	19833.9	19015.7	16665.5	19248.5	18705.7	18063.6	20862.6	19942.6	18648.4	22053.9	18071.9	22797.1	20652.2	16744.3	19408.4	20190.8	17485.5	20128.6	19810.3	12919.8	20800.3	21928	15653.3	17734.8	22884	15374.8	24260.7	20165.1	13621.1	17473.4	15622.8	18392.6	16865.9
A0A0D9QUM1;A0A0D9R7N7;A0A0D9RN38;A0A0D9RLY6	A0A0D9QUM1;A0A0D9R7N7;A0A0D9RN38;A0A0D9RLY6	A0A0D9QUM1_CHLSB;A0A0D9R7N7_CHLSB;A0A0D9RLY6_CHLSB;A0A0D9RN38_CHLSB	SPTB;SPTBN1;SPTBN2;SPTBN4		5540.5								18064.7	6509.38								9215.61			5533.42				5788.24		22860						8459.76			18185.8			27750.5		18212	27427.4	10389.2
A0A0D9QUM1;A0A0D9RN38;A0A0D9RLY6	A0A0D9QUM1;A0A0D9RN38;A0A0D9RLY6	A0A0D9QUM1_CHLSB;A0A0D9RLY6_CHLSB;A0A0D9RN38_CHLSB	SPTB;SPTBN1;SPTBN4		15943.1		7551.37	11667.5	10851	11842.5	12757.7	7618.75	13985.2	15806.5	14731.7	11978	11964.4	9039.28	11062.1	12481.8	5641.34	10297.9	12448.8	7341.1	13332.5	13453.3	11878.4	11816.9	15067.9	16116.1	17367.7	16956.7	13347.8	12027.2	16546.8	7133.16	11207.2	13933.6	10184.9	11232.2	15299.3	14391.2	16641.7	14778.4	13265.9	13274.2	15889.7	11266.6	12046.9
A0A0D9QUM2	A0A0D9QUM2	A0A0D9QUM2_CHLSB	DLG2		1157.39	3573.5	2947.33		2617.64	1847.77	1265.08	3822.24	1684	1008.18		1785.53		1456.23		2444.56	2377.9	2435.31	2226.43	1928.38	2445.3	2168.08	3305.32	3478.47	1532.79			734.776	2015.3			5007.28	1752.61	1951.26	2701.84	565.985	2760.31	3593.75	1750.69	2330.51		2471.53		1960.99	1948.83
A0A0D9QUM2;A0A0D9R8Q0	A0A0D9QUM2;A0A0D9R8Q0	A0A0D9QUM2_CHLSB;A0A0D9R8Q0_CHLSB	DLG2		2364.52		4437.79		2957.94	3307.55	4186.46	2464.6	3022.68	2843.32	3300.11	3203.29	2683.14	3526.96	2814.66	3182.77	3633.43	4461.66	4904.9	3361.11	3676.76	3553.39		3527.79	2764.09	5762.78	5269.9	3431.2	4160.97	3544.56	3425.02		3321.96	2553.72		3147.87		2832.2		3072.02		3983.52	4209.87	4151.45	3068.14
A0A0D9QUM3	A0A0D9QUM3	A0A0D9QUM3_CHLSB	BCAR1		11215.5	7072.26	11265	11743.6	10401.3	11479.4	11260.1	5746.87	9795.59	9110.07	8923.69	10542.3	9939.46	9903.09	8811.88	11984.4	8713.46	11417.1	12540.8	10886.6	11550.6	11193.7	10999.5	11349.6	10620.9	11086.8	9015.01	9191.81	10227	10211.3	10873.9	11235.5	11156.5	11558.8	10523.6	9967.03	11378.1	9275.39	7522.7	11658.5	7712.88	8195.55	10613.4	10571.6	10877.5
A0A0D9QUM9	A0A0D9QUM9	A0A0D9QUM9_CHLSB			1594.09	2089.19		2288.43	2439.22	1728.66	3079.26	2319.31	1548.59	1825.39	1554.17	1991.71	2262.72			2001.29				1541.52	1057.88	2524.51	2574.89	2392.17	1995.24	2192.69			1846.69	2126.41			2460.21	1552.84	2256.82	2169.8	2216.65	2282.65		2461.42				2738.26	1781.96
A0A0D9QUN1	A0A0D9QUN1	A0A0D9QUN1_CHLSB	CCNA2		10018.1	8665.65	9245.39	7095.18	9410.71	8553.72	5303.5	7961.53	6938.3			6408.42	6146.95			9036.66	12045	7986.4	6959.19	9062.09	8103.2	6765.8	5845.45	7222.37	6801.11	5995.83	6171.47	5570.08	7217.31	6910.96	10138.2	9169.88	9216.79	6577.45	10887.7	8698.73	6686.18	8699.41	7486.9	7312.62		7787.89	7584.34	6976.03	6994.42
A0A0D9QUN2	A0A0D9QUN2	A0A0D9QUN2_CHLSB	PCF11		5105.35	5737.74	6511.92	5014.61	5852.59	6026.09	6473.78	4672.48	5109.96	4725.57	5423.52	5955.44	5534.76	5430.68	5097.27	5860.16	6244.76	6096.92	6418.3	5830.78	6077.29	5588.39	5474.87	5924.93	6845.89	6353.05	5275.45	6146.45	5583.37	6014.28	6140.36	6891.55	6306.88	5786.44	6048.79	5229.86	6333.94	5912.53	5201.19	6104.67	6244.46	5216.55	6467.62	6565.06	6867.09
A0A0D9QUN6	A0A0D9QUN6	A0A0D9QUN6_CHLSB	EXOSC9		25445.2	22794.2	24396.6	35106.8	27705	28456.2	27244	29045	28412.6	28047.5	25984.8	24444	29577.7	25984.6	24664.7	31877.3	25651.7	31016.6	28567.9	22466	28822.1	28286.5	30306.1	25090.8	29469.9	32904.6	26138.1	31322.8	29299.1	27084.2	24881.3	29383.8	27146.8	27355.2	26192.9	22261.2	23157.2	28972.4	23188.6	29263.6	18859.4	23658.4	24383.7	25965.2	29192.4
A0A0D9QUN8	A0A0D9QUN8	A0A0D9QUN8_CHLSB	MRPL42		2296.75				2301.51					1269.58						2087.8					1338.63		1497.32
A0A0D9QUP1	A0A0D9QUP1	A0A0D9QUP1_CHLSB			144675	97041.6	148603	139555	163437	171940	159013	132918	158011	160972	125139	184595	162854	167722	163076	168752	166251	172854	165848	156412	172402	162758	169769	158567	158499	167619	177734	166310	195838	175329	161135	134611	181853	172858	165509	141247	159258	142019	160697	187362	151823	163800	168080	163664	184294
A0A0D9QUP1;A0A0D9SA23	A0A0D9QUP1;A0A0D9SA23	A0A0D9QUP1_CHLSB;A0A0D9SA23_CHLSB			67207.8	43587.5	61015.6	37617.6	34531.6	54975.2	64631.5	43433.8	86969.9	95310.3	63797.7	51436.1	52936.5	43389	59574.5	79682.4	48463	69203.1	67638.5	52601.1	77880.3	71476.3	56676.5	59151.8	82411.4	63036.5	84860.5	93096.9	43481.8	56430.7	81650.8	48282.9	87289.6	71478	64511.9	80125.8	71345.4	51849.9	81173.9	75537.2	97462.2	116820	84098.7	49956.6	76723.6
A0A0D9QUP3	A0A0D9QUP3	A0A0D9QUP3_CHLSB			6451.79	1970.59		5906.06	2263.95		5099.4	2185.91	5648.72	4937.09		2356.37	2612.78	5902.74	3228.42	5274.56	3184.09	1651.24	4168.7		3211.58	3260.5		3503.52	4381.34	4488.08	7083.11	3414.59	2025.69	3552.18		3606.12	3041.5	4085.87	4627.08	13012.9	3299.99	2664.75	11031.7	7427.99	7238.02	10349.2	5336.59	4381.17	4427.61
A0A0D9QUP3;A0A0D9RJT5	A0A0D9QUP3;A0A0D9RJT5	A0A0D9QUP3_CHLSB;A0A0D9RJT5_CHLSB			1741.7	1283.61	2195.52	1770.95	1572.93	1043.09	811.241	2125.2	1557.89	1502.96	1608.49	1478.81	992.058	1719.99	1038.02	1148.59	1237.34	866.516	1243.39	1971.2	2207.2	1984.08	1081.8	1009.86	884.756	1394.32		1876.32	1928.73	1670.1	1069.09	2390.14	1628.9	2315.58	2271.46	817.343	1893.56	1963.19	1084.3	1987.34			2391.96	3193.74	2118.4
A0A0D9QUP4	A0A0D9QUP4	A0A0D9QUP4_CHLSB	ANXA5		52770.5	92226.2	91463.2	80523.5	79423.7	88644.4	65452.5	65753.2	67338.8	78334.5	84270.1	85948.4	66664.9	70897.8	64028	44667.2	61377.4	64877.8	86803.8	74423.3	75922.3	58851.4	71297.5	65048.9	80793.5	138054	105462	77070.8	86812.9	74062.3	46141.3	55624.7	62354.3	89908.3	81512.6	87881	82747.1	70278	63011.4	84110.6	87378.5	79252.5	34002.3	75685.9	66875
A0A0D9QUP4;A0A0D9RF24	A0A0D9QUP4;A0A0D9RF24	A0A0D9QUP4_CHLSB;A0A0D9RF24_CHLSB	ANXA5;ANXA6		23107.6		5665.93	4556.01	7605.05	10094.9	11575.8		29896.1	17504.5			7258.09	3326.92	8638.8	4790.08		10760.6	5419.42		11362	6831.2	5205.84	5585.85	14785.2	11291.7	38872.1	9950.57	5739.79	16201.9	6841.26		22008.4	9120.37		104694	7221.91		31961.4	8497.87	117353	116839	13815.6	4398.52	23669.5
A0A0D9QUP5	A0A0D9QUP5	A0A0D9QUP5_CHLSB	PRCP		3600.92	2471.37	2613.74	2353.34		3194.72	1895.77		2638.41							3053.75	3530.02		2345.38	3164.26	2651.61	2579.44		1923.75				2425.73		1939.44	2868.93	2980.81	2708.79	2359.15	4045.23	2440.02	2988.19	3079.35	3015.04	2612.4		3087.5
A0A0D9QUP6;A0A0D9RFI2;A0A0D9RFM7;A0A0D9RII9;A0A0D9S9D4;A0A0D9S9N5;A0A0D9SAT6;A0A0D9SAV2;A0A0D9SBK0;A0A0D9SBT1;A0A0D9SCA5;A0A0D9SE27	A0A0D9QUP6;A0A0D9RFI2;A0A0D9RFM7;A0A0D9RII9;A0A0D9S9D4;A0A0D9S9N5;A0A0D9SAT6;A0A0D9SAV2;A0A0D9SBK0;A0A0D9SBT1;A0A0D9SCA5;A0A0D9SE27	A0A0D9QUP6_CHLSB;A0A0D9RFI2_CHLSB;A0A0D9RFM7_CHLSB;A0A0D9RII9_CHLSB;A0A0D9S9D4_CHLSB;A0A0D9S9N5_CHLSB;A0A0D9SAT6_CHLSB;A0A0D9SAV2_CHLSB;A0A0D9SBK0_CHLSB;A0A0D9SBT1_CHLSB;A0A0D9SCA5_CHLSB;A0A0D9SE27_CHLSB			23578.6	5782.28	8713.78	12024.4	10301.8	12394.2	23145.4		38572.5	27010.6	11507.6	10325.6	15881.3	10625.2	15948.9	8612.08	8530.88	14984.6	11297.8	6279.64	18613.1	22508.2	10920.9	18716.5	30642.7	15904.7	36420.6	17153.8	12173.5	14249.1	23550.1	8437.9	30119.2	16742.6	8679.13	84426.4	21467.7	12082.3	57528.6	17928.4	69314.7	99361.4	28820.6	10092	24736.3
A0A0D9QUP6;A0A0D9RFI2;A0A0D9RFM7;A0A0D9RII9;A0A0D9S9D4;A0A0D9S9N5;A0A0D9SAT6;A0A0D9SAV2;A0A0D9SBT1;A0A0D9SCA5;A0A0D9SE27	A0A0D9QUP6;A0A0D9RFI2;A0A0D9RFM7;A0A0D9RII9;A0A0D9S9D4;A0A0D9S9N5;A0A0D9SAT6;A0A0D9SAV2;A0A0D9SBT1;A0A0D9SCA5;A0A0D9SE27	A0A0D9QUP6_CHLSB;A0A0D9RFI2_CHLSB;A0A0D9RFM7_CHLSB;A0A0D9RII9_CHLSB;A0A0D9S9D4_CHLSB;A0A0D9S9N5_CHLSB;A0A0D9SAT6_CHLSB;A0A0D9SAV2_CHLSB;A0A0D9SBT1_CHLSB;A0A0D9SCA5_CHLSB;A0A0D9SE27_CHLSB			2960.77	2118.23	2293.97	3418.87	3686.66	3509.27	3912.7	3636.99	3422.2	3893.11	3159.92	4465.04	3571.42	3817.8	3229.15	2392.88	1707.81	2300.13	2400.6	2912.09	2178.82	3859.59	3002.24	3481.75	3845.91		1782.57	4011.78	3218.81	1949.61			2074.74	3877.78	2483.44	2226.28	4493.04	4134.64	3283.09	2689.65		1227.91	1353.07	2255.34	3996.02
A0A0D9QUP6;A0A0D9RFI2;A0A0D9RFM7;A0A0D9RII9;A0A0D9S9D4;A0A0D9S9N5;A0A0D9SAT6;A0A0D9SBT1;A0A0D9SE27	A0A0D9QUP6;A0A0D9RFI2;A0A0D9RFM7;A0A0D9RII9;A0A0D9S9D4;A0A0D9S9N5;A0A0D9SAT6;A0A0D9SBT1;A0A0D9SE27	A0A0D9QUP6_CHLSB;A0A0D9RFI2_CHLSB;A0A0D9RFM7_CHLSB;A0A0D9RII9_CHLSB;A0A0D9S9D4_CHLSB;A0A0D9S9N5_CHLSB;A0A0D9SAT6_CHLSB;A0A0D9SBT1_CHLSB;A0A0D9SE27_CHLSB												3135.29																										3489.7
A0A0D9QUP6;A0A0D9RFI2;A0A0D9RFM7;A0A0D9RII9;A0A0D9S9D4;A0A0D9SAV2;A0A0D9SBR4;A0A0D9SCA5;A0A0D9SE27	A0A0D9QUP6;A0A0D9RFI2;A0A0D9RFM7;A0A0D9RII9;A0A0D9S9D4;A0A0D9SAV2;A0A0D9SBR4;A0A0D9SCA5;A0A0D9SE27	A0A0D9QUP6_CHLSB;A0A0D9RFI2_CHLSB;A0A0D9RFM7_CHLSB;A0A0D9RII9_CHLSB;A0A0D9S9D4_CHLSB;A0A0D9SAV2_CHLSB;A0A0D9SBR4_CHLSB;A0A0D9SCA5_CHLSB;A0A0D9SE27_CHLSB			70664.7	61131.1	74032.1	95999.1	57892.9	76209.9	89696.6	63573.9	53369.3	55039.9	61599	62735.9	52093.4	70007.4	76773.1	98034.1	98028.5	93154.7	115679	101851	80369.5	90849.4	62711.5	73337.9	75065.6	85179.8	69024.4	62596.5	73821.1	48239.3	77307.2	106913	98883	99572.7	98819.3	39247.4	76023.1	94311.4	55105.3	104424	76078.5	80179	70354.6	71329.9	56804.8
A0A0D9QUP6;A0A0D9RFI2;A0A0D9RFM7;A0A0D9S9D4;A0A0D9S9N5;A0A0D9SAT6;A0A0D9SBK0;A0A0D9SBR4;A0A0D9SCA5	A0A0D9QUP6;A0A0D9RFI2;A0A0D9RFM7;A0A0D9S9D4;A0A0D9S9N5;A0A0D9SAT6;A0A0D9SBK0;A0A0D9SBR4;A0A0D9SCA5	A0A0D9QUP6_CHLSB;A0A0D9RFI2_CHLSB;A0A0D9RFM7_CHLSB;A0A0D9S9D4_CHLSB;A0A0D9S9N5_CHLSB;A0A0D9SAT6_CHLSB;A0A0D9SBK0_CHLSB;A0A0D9SBR4_CHLSB;A0A0D9SCA5_CHLSB			20213.6	17867.4	18938.1	29692.5	17719.5	20813.3	20189.9	16165.4	18584.3	18442	23992.1	21861.7	15221.1	15715.6	16814.8	26244.7	20499.2	25316.3	31524.3	25615.2	20418.5	23637.9	20393.1	19513.4	19139.3	23027.6	18801.1	16637.3	22129.6	12199.4	23596.3	28759.2	25283	24841.9	21455.6	20817.6	24177	25726.9	15811.3	21955.7	14822.1	19209.1	17701.5	14708.4	15066.8
A0A0D9QUP6;A0A0D9RFI2;A0A0D9RFM7;A0A0D9S9D4;A0A0D9SAT6;A0A0D9SBT1;A0A0D9SE27	A0A0D9QUP6;A0A0D9RFI2;A0A0D9RFM7;A0A0D9S9D4;A0A0D9SAT6;A0A0D9SBT1;A0A0D9SE27	A0A0D9QUP6_CHLSB;A0A0D9RFI2_CHLSB;A0A0D9RFM7_CHLSB;A0A0D9S9D4_CHLSB;A0A0D9SAT6_CHLSB;A0A0D9SBT1_CHLSB;A0A0D9SE27_CHLSB				299.802	543.811	609.808	462.844		269.483	401.969	167.762		542.696	483.665		594.351		354.449	794.83		505.032	683.974	209.317	759.541	651.213	783.621	219.063	519.271			414.285		429.053	846.545	735.771	552.63	672.599	428.848	361.228	761.259				825.267		545.33	286.509
A0A0D9QUP6;A0A0D9RFM7;A0A0D9RII9;A0A0D9S9D4;A0A0D9S9N5;A0A0D9SBT1;A0A0D9SCA5;A0A0D9SE27	A0A0D9QUP6;A0A0D9RFM7;A0A0D9RII9;A0A0D9S9D4;A0A0D9S9N5;A0A0D9SBT1;A0A0D9SCA5;A0A0D9SE27	A0A0D9QUP6_CHLSB;A0A0D9RFM7_CHLSB;A0A0D9RII9_CHLSB;A0A0D9S9D4_CHLSB;A0A0D9S9N5_CHLSB;A0A0D9SBT1_CHLSB;A0A0D9SCA5_CHLSB;A0A0D9SE27_CHLSB			24874.4				4208.8	4584.85	6536.55		9456.94	13986.9			21544.1		6780.58	5163.67	3768.71	6470.08	4400.68	4516.04	6304.33	5858.36		4041.39	19079.9	8314.84	85114.1			3507.04	7394.92	9525.52	7089.29	5985.43	6096.5	28001.3	19080.3	3277.87	37271.2	4287.59	288924	281374	10686.9		5542.17
A0A0D9QUP6;A0A0D9RFM7;A0A0D9S9D4;A0A0D9SAV2;A0A0D9SBR4	A0A0D9QUP6;A0A0D9RFM7;A0A0D9S9D4;A0A0D9SAV2;A0A0D9SBR4	A0A0D9QUP6_CHLSB;A0A0D9RFM7_CHLSB;A0A0D9S9D4_CHLSB;A0A0D9SAV2_CHLSB;A0A0D9SBR4_CHLSB			25945.9	45606.7	19276.5	19343.6	19964.2	20245.4	27506.1	52286.2	34810.6	26509	19638.4	45076.6	23903.9	23111.4	25177.5	30933.7	52272.6	28199.5	26523.5	19395.3	27197.2	26218.5	23555.4	27857.2	33256.5	20722.5	32399.9	22001.5	24219.3	19587.1	21163.6	47473.5	32732.6	26164.9	20970.1	32185.6	26486.4	16810.2	28631.8	30563.3	41365	43121.4	19726.3	32404	22690.3
A0A0D9QUQ1	A0A0D9QUQ1	A0A0D9QUQ1_CHLSB	EEA1		18312.3	17186.1	20276.6	19566.3	18901.1	18156.3	18247.8	17425	19640.2	18066.7	19555.7	19643.7	18988.4	18296.8	19476.9	19646.8	18678	19317.4	19251.5	17605.1	19316.6	19576	19992.7	19526	18464.1	18389.8	18120.5	19403.2	18788.3	19366.6	18774.1	17200.3	17357.8	18760.9	18013.6	17610.4	19421.8	18029	17383.4	20125.4	14682	16847.9	21309.4	18667.5	20011.4
A0A0D9QUQ4	A0A0D9QUQ4	A0A0D9QUQ4_CHLSB	BLVRB		35229.3	26070.1	32054.6	34136.3	31828.5	29879.6	31222.8	28847.1	37993.6	38827.4	39575.4	37250.8	36472.2	38499.1	32777.6	32668	27607.1	28301	31246.5	25279.3	30187.3	36976	36873.6	40250.2	34894.6	30674.3	36401.9	41983.7	36431.4	34772.9	32933.9	21522.3	25908	30853.9	30402.1	34127.3	32504.2	30858.3	33776.3	34725.5	32997.7	34285.2	27589.8	34957.1	32037.9
A0A0D9QUQ5	A0A0D9QUQ5	A0A0D9QUQ5_CHLSB	CBFB		12235.3	8233.04	10792.4	11518.4	11488.5	10426.4	10537.3	9597.74	11889.9	12110	10113.1	10651.7	12007.2	10711.2	10331.1	11627.1	10949.9	11268.8	11144.5	8080.73	11468.7	11113.9	11266.8	11990.1	11020.8	10367.6	9627.33	11887	11002.9	13021.6	10502.9	9652.73	11319	11031.2	10517.1	9123.33	10828.9	10223.6	9557.54	11129.4	7802	9213.24	11189.5	11187	10138.5
A0A0D9QUR2	A0A0D9QUR2	A0A0D9QUR2_CHLSB	PHAF1		2951.15	4483.79	3585.45	4971.74	4524.83	4715.74	4733.81	8155.41	3549.45	3413.95	4759.3	3420.93	5452.49	6064.5	4042.74	3849.06	4981.75	4074.5	5598.1	6001.44	3231.98	3202.1	5118.94	4636.85	4000.61	4361.53	4108.68	3658.46	4243.73	4421.36	3093.77	6266.45	4141.24	3795.23	5547.9	3214.21	4187.7	5067	3767.42	4697.95		4026.96	2904.93	4719.79	3160.82
A0A0D9QUR3	A0A0D9QUR3	A0A0D9QUR3_CHLSB				1681.15								2287.32							4229.68		2522.59	1306.3										2941.01	4393.98		2361.65	3402.17			2182.81			3027.74			1783.33	1316.91
A0A0D9QUR7	A0A0D9QUR7	A0A0D9QUR7_CHLSB	TRADD		7867.48		8003.68	7539.58	4985.33	8316.19	7036.81	7553.24	9725.18	9281.67		10192.8	7426.18	6534.5	7424.8	6842.92		9800.28	8674.4	7983.96	7678.71	8008.08	10938.1	7002.49	10046.3	7772.02	10767.7	9265.32	8450.84	7464.74	10126.8	7109.9	10554.1		7455.83	13362.2	6522.94	8582.95	9443.77	6164.15	18238.6	17615.3	10744.3	9500.71	8419.81
A0A0D9QUR8	A0A0D9QUR8	A0A0D9QUR8_CHLSB	GOSR2		7087.44	7123.01	8082.94	5269.77	6655.19	8023.6	9846.31	5921.26	6690.66	7739.3	4445.98	4962.54	6928.92	7471.2	7958.45	9851.6	11113.9	10305.3	7479.67	7990.77	8092.74	6887.8	6357.46	7337.71	8730.79	6977.75	7706.53	6497.68	6095.12	5902.54	8704.36	8749.13	12120.3	7110.27	7438.66	9711.86	7753.39	10645.9	9275.1	8545.07	13166.1	11426.7	7352.35	6892.19	6956.91
A0A0D9QUS0	A0A0D9QUS0	A0A0D9QUS0_CHLSB	PLD3		11503.3		11284.1	3406.75	7697.11	4793.8	17703.5		21528.2	14136.6			64450.1			5010.58	6403.44	6984.83	6461.25	3470.21	7998.34	12562	6365.56	8926.33	20509.7		20362.1			2571.7	11475.6		7843.48	7192.37	2441.11	9608.54	7143.39		10020.8	5663.76	47058.4	9914.04	2946.24	3317.5	1383.43
A0A0D9QUS1	A0A0D9QUS1	A0A0D9QUS1_CHLSB	FBXL8		3364.66			2853.73		1609.18	3226.67		3687.22	4147.53			1647.35		3127.33	3249.92		2823.54	1765.87	1547.75	3146.52	2207.02	1960.42		2860.96	2979.77	3539.8	3519.6	2470.09	2963.47			2169.08				1916.81		2181.14	2503.09		2916.61	4081.8		2942.98
A0A0D9QUS3	A0A0D9QUS3	A0A0D9QUS3_CHLSB	LUM		4103.16	6287.6	5024.06	3598.48	4346.21	4383.44	3227.32	4015.56	2642.71	3080.59	3264.98	3296.22	3894.52	4671.77	3479.51	5638.41	6387.1	6560.96	4621.9	3558.75	4138.3	2567.1	3606.88	3286.09	3476.05	2641.63	3396.08	3573.75	3811.7	3858.99	4252.49	5693.11	7122.58	3339.63	4530.65	3723.04	2566.27	3635.68	2651.04			5659.57	3436.51	4316.88	3645.3
A0A0D9QUS7	A0A0D9QUS7	A0A0D9QUS7_CHLSB			368.326	1838.66	1899.8	1113.82	1183.9	1012.16		838.396	806.735	530.074			860.269	1565.49	1303.72	1596.76	2925.45	1746.17	1420.26	2126.59	297.97	632.312		593.241	553.4					941.035		2023.97	2621.45	885.036		533.334	955.508	2571.16	776.555	721.721				672.997	1109.84
A0A0D9QUT3	A0A0D9QUT3	A0A0D9QUT3_CHLSB	AKT2		1136.15		1389.67	1289.59	1012.39	1094.7	1562.77			902.638	1239.69	1892.93	785.246	1092.44		889.119	1368.71			1747.04	967.159			1160.86	1852.54	1478.34		771.357	1113.2	819.751	1182.33	1998.81	1272.72	2536.77	1384.36	941.966	1756.92	1560.12		1713.87				916.655	550.004
A0A0D9QUT3;A0A0D9R1Z3;A0A0D9RBG0;A0A0D9RAE4	A0A0D9QUT3;A0A0D9R1Z3;A0A0D9RBG0;A0A0D9RAE4	A0A0D9QUT3_CHLSB;A0A0D9R1Z3_CHLSB;A0A0D9RAE4_CHLSB;A0A0D9RBG0_CHLSB	AKT1;AKT2;AKT3;PKN1																										2439.41	5237.29											4642.85	4572.64					6656.2		5533.49
A0A0D9QUT9	A0A0D9QUT9	A0A0D9QUT9_CHLSB	SEC24D		11440.1	7595.11	8946.43	8881.12	8600.43	9378.84	11299.3	6491.82	11338.4	11805.2	7149.58	7898.3	9708.03	8496.76	10072.7	10011.4	7764.56	11074.2	8559.45	6858.77	11388.4	11125.5	9263.21	10506.4	11927.4	10458.7	9955.54	9109.67	9724.18	11191.1	9274.95	7421.03	10969.9	10349.6	6386.78	8683.27	10540.7	6515.47	10128.2	10573.6	7637.1	8930.61	10275.8	8755.54	10108.3
A0A0D9QUT9;A0A0D9R977	A0A0D9QUT9;A0A0D9R977	A0A0D9QUT9_CHLSB;A0A0D9R977_CHLSB	SEC24C;SEC24D		8187.16	7200.8	7678.37	9050.34	7402.23	9179.08	6442.34	7639.59	5423.46	8261.08	9273.86	7865.02	7645.66	6884.74	8196.36	12150.5	7494.21	11496.9	9965.09	10421	8752.38	7833.28	7764.29	9209.29	8360.28	9220.8	7708.9	5694.85	8874.03	6940.02	7944.9	7236.48	7007.12	6750.79	8365.88	3240.19	7167.07	8010.11	3959.86	7891.46	4770.25	5509.78	11847.5	10357.5	6296.7
A0A0D9QUU0	A0A0D9QUU0	A0A0D9QUU0_CHLSB			6118.13										12857.5											16923.1			9127.16			13022.3														28404.4
A0A0D9QUU3	A0A0D9QUU3	A0A0D9QUU3_CHLSB	METTL14		9467.27	8181.58	10707.8	10068.8	8061.24	9581.15	10439	11375.5	9099.88	9185.83	8284.05	10593.4	9725.94	9963.52	9277.44	9969.17	8639.82	8326.38	10510.1	9225.25	8469.97	9324.31	8831.43	9652.9	8980.69	9148.62	10202.3	9473.03	10150.7	8692.32	9237.22	10041.4	9207.85	10067.3	8458.55	7750.8	8756.67	9765.77	7473.83	9017.54	9997.33	8865.97	10734.5	9448.98	10447
A0A0D9QUU5	A0A0D9QUU5	A0A0D9QUU5_CHLSB	NSF		91880.1	91630	93033.3	88258.5	85116.8	88630.9	94914	89246.9	96841.5	88886.6	94189.7	88247.8	91945.3	93203.2	93316.6	96947.5	79278.8	89624.9	91448.4	87923.8	95199	91076.1	96702.7	96668	95543	96682.4	95081.1	94091.8	93998.7	96665.7	93852.1	89481	95100.3	99536.2	87600.3	86452.4	88899.7	87969.6	90393.9	96611.6	86968.8	86833	91911.4	91438.8	95023.6
A0A0D9QUU6	A0A0D9QUU6	A0A0D9QUU6_CHLSB	ATP2B1		15159.5	17663.1	12328.1	12290.6	13028.1	12971.6	18421.3	12331.6	12983.3	14230.3	14441.1	17791.1	16809.3	22215.1	17282	13165.8	17275.1	18156.9	14138.1	14525.6	11866	14369.4	12303.7	13703	16421.5	14095.6	14798.2	11878.8	11541.8	12750.4	13600.8	18410.4	19577.1	13604.8	14519.3	13825.9	15592	23320.2	12523.1	16003.1	10435.5	12520.6	10889.4	12113.2	15557.7
A0A0D9QUU6;A0A0D9RPG9	A0A0D9QUU6;A0A0D9RPG9	A0A0D9QUU6_CHLSB;A0A0D9RPG9_CHLSB	ATP2B1;ATP2B4		14051.5	19667.7	13815.8	13303.4	13172.3	11985.9	16802.2	12346.3	14611	13416.7	13806.8	14163.8	18724.3	26190.9	16639.8	10879.7	22713.7	18752.4	11373.6	10797.5	10014.6	11800.4	12378.9	11385.3	14336.4	11469.2	11095.4	12127.1	13202.4	12226.5	10712.4	16247.1	19453.6	11653.7	11693.5	13138.7	15082.6	20280.6	12061.9	11903.1	13896.9	15035.5	9123.75	11892.8	14597.8
A0A0D9QUU6;A0A0D9RPG9;A0A0D9R3P5	A0A0D9QUU6;A0A0D9RPG9;A0A0D9R3P5	A0A0D9QUU6_CHLSB;A0A0D9R3P5_CHLSB;A0A0D9RPG9_CHLSB	ATP2B1;ATP2B3;ATP2B4		3941.16	3802.52	4492.48	3748.94	4900.28	5089.56	4937.21	3367.04	4067.13	3056.69	2325.56	4848.11	4759.91	5674.06	4504.4	3217.91	5177.98	6328.25	3808.14	3945.47	3601.18	3588.51	3915.71	2795.34	4060.2	4189.1	4761.06	2910.79	2966.95	2300.23	2049.63	4451.69	7697.61	4045.35	2726.8	5117.77	4778.75	4572.53	6267.61	3545.04	4219.66	4097.35	2222.27	2462.92	3569.29
A0A0D9QUU6;A0A0D9RPG9;A0A0D9R3P5;A0A0D9RCC0	A0A0D9QUU6;A0A0D9RPG9;A0A0D9R3P5;A0A0D9RCC0	A0A0D9QUU6_CHLSB;A0A0D9R3P5_CHLSB;A0A0D9RCC0_CHLSB;A0A0D9RPG9_CHLSB	ATP2B1;ATP2B2;ATP2B3;ATP2B4		10644.2	7428.39	11180.9	9466.68	10667.9	10313.4	13778.3	5882.51	12625.4	11832.9	9357.78	9082.61	14968.7	15640.6	16725.9	12422.6	15134.2	16537.3	13025.6	9121.77	11044.9	12518.4	10662.6	11995.5	12092.1	13204.3	13776.9	10470.2	11352.1	11131.3		12305.8	18297.7	10880.8	8582.53	11301.4	14453.2	14044.6	13375.1	9054.32	6655.61	8845.37	10320.3	7818.67	13629.4
A0A0D9QUV1	A0A0D9QUV1	A0A0D9QUV1_CHLSB	PSMC4		63644.3	58338	62856.8	59404.1	60776.3	59838.6	61122.6	64005.2	68373.1	63462.7	64445.1	67057.8	68072.6	60174.3	61475.4	66518.8	58959.4	62443.2	60573.1	63835.9	66782.8	63957.8	66535.5	65198.3	59350.3	59797.2	55886.2	64286.7	64502.5	66633.1	58263.2	56706.2	58269.3	68815.6	64717	63846.7	59629.8	62833	64310.6	63362.3	69564.4	57667.3	60653.9	60746.6	64884.2
A0A0D9QUV2	A0A0D9QUV2	A0A0D9QUV2_CHLSB	POC1B		17385		2912.47	4025.1	2502.21	3966.68	9245.3		9710.96	15558.2	3475.86	1963.23	5652.18	2266.8	4133.21	6450.93	665.002	4884.05	4027.65		8834.49	8389.3	1861.17	5142.35	14276.7	5360.63	16341.4	9052.93	3054.52	5131.64	8142.15		9355.48	6391.44	1590.43	10453.5	6454.87	995.443	11877.5	9536.05	14698	15352.3	13230.2	1756.83	10798
A0A0D9QUV4	A0A0D9QUV4	A0A0D9QUV4_CHLSB	MAPT		21081.4	20247.3	18768.7	21379.9	22687.3	20971.8	20790.7	18563.8	19883.4	20645.1	26085.8	24998.4	23982.6	24016.1	21849.7	21517.4	19140.4	18190.2	19486.9	17147.3	21272.5	21873.6	20253.8	23818.2	19398.2	20626.4	21413.4	22174.6	20749.7	22858.9	22517.3	19078.7	20105.4	17337.7	18314.7	17468.7	20706.7	18263.1	19623.3	19257.2	17414.1	14264	24735.9	22787	22932.8
A0A0D9QUV7	A0A0D9QUV7	A0A0D9QUV7_CHLSB	KANSL1		7638.98	5012.57	7854.11	8290.08	9668.93	9774.17	7034.76	9931	8187.43	5871.08	7054.52	6940.14	6473.14	7067.31	7179.11	8606.85	8591.25	8127.04	7506.88	7045.28	8508.48	8028.44	8850.18	9584.15	6485.71	6716.47	4599.79	7057.3	6762.85	7879.82	6906.88	8372.75	6215.48	8480.66	9181.14	7874.86	9438.44	9343.75	8102.07	8211.43	8916.64	7223.03	7579.09	6797.98	8165.15
A0A0D9QUW2	A0A0D9QUW2	A0A0D9QUW2_CHLSB	FBL		58607.5	47659.8	56343.5	61568.2	58571.7	59906.3	54830.7	54759	57589.3	57044.5	63812.9	62027.1	62178.9	62222.9	64013.4	59588.7	55577	58839.2	57584.6	48059.2	57340.8	55083.7	58577.8	58988.1	54769.6	59476.2	56028.6	59114.4	59496	53387.9	53660.5	56947.2	59995.2	56586.3	55526.7	56085.7	55248.3	54404.6	51808.2	53426.1	31774.2	44336	61558	60788.7	63319.5
A0A0D9QUW2;A0A0D9RCQ0	A0A0D9QUW2;A0A0D9RCQ0	A0A0D9QUW2_CHLSB;A0A0D9RCQ0_CHLSB	FBL;FBLL1		22382.7	18195.7	17265.7	27462.5	23664	27940	27154.9	21833.2	22101.8	17095.4	26577.1	27635.8	23061.8	23620.9	24168.2	20178.4	20906	21963.6	27438.3	25294.2	23468	24184.8	27224.2	20289.4	19895.2	27616.3	18378.1	27556.3	30778.4	19167.1	31255.2	27661.4	22107.2	29864.8	27119.9	19585.5	27877.9	30815.7	19245.4	26191.3	16713.4	11327.3	20399.2	25328.3	21500.2
A0A0D9QUW3	A0A0D9QUW3	A0A0D9QUW3_CHLSB	TMTC3		3420.02	4762.22	4082.48	3280.78	3280.26	3581.23	7115.15	2056.97	3787.13	2906.88	3818.16	2508.82	4075.29	5517.7	5685.12	4216.31	5717.46	7172.71	3341.76	3377.28	3261.74	3870.38	2184.1	2872.4	4811.23	4037.65	3825.03	2457.28	3027.52	3161.15	4965.77	4906.17	7969.81	4249.12	3039.4	2309.5	6636.86	7014.76	3040.03	4326.59	3599.31	4438.04	2982.73	2853.66	4899.25
A0A0D9QUW7	A0A0D9QUW7	A0A0D9QUW7_CHLSB	UGT8		3193.25	2012.78	2654.7		2053.41	2216.01	4888.56		2438.69	2615.93			3126.91	2676.23	4082.91	2558.43	4067.01	6949.23	2658.86	1475.22	2405.73	3378.5	1774.48	2427.63	3007.69	1820.93	3071.31	3270.08	2741.91	2296.91	3876.39	3316.85	7148.2	3084.66	3134.62	4320.44	4837.66	5401.19	3147.78	3642.07	4002.61	4668.96	3061.17	2641.44	2811.54
A0A0D9QUX3	A0A0D9QUX3	A0A0D9QUX3_CHLSB	NARS2		9196.58	10077.1	8721.32	8407.83	9822.31	10290.9	10191.4	9524.37	9373.11	8227.17	7926.84	8573.57	10147.9	10599.7	10171.9	8393.19	9743.25	9395.02	9778.89	9440.19	9687.43	9880.67	7884.38	9243.51	10488.5	8176.03	9291.44	9438.08	9677.49	10213.5	11022.2	9267.99	10508.2	10340.8	10382.1	12061.5	9790.9	9279.69	10018.7	7817.34	11406.9	9330.83	7162.35	10534.1	10053.5
A0A0D9QUX4	A0A0D9QUX4	A0A0D9QUX4_CHLSB			10148.5	9984.12	10408.7	9393.72	9008.85	10147.6	9137.99	10512.2	9167.4	8552.16	8367.34	10053.2	9141.03	9923.26	9459.9	10920	10885.9	9464.11	10039.1	11174.2	9402.53	9286.17	8422.95	9725.83	8064.44	12156.1	9910.93	8266.75	10392.6	8301.86	9002.58	10137	9537.56	9762.1	9264.56	8741	9281.23	9029.12	6591.37	8782.2	7396.37	9727.31	12220.6	10781.4	10155.3
A0A0D9QUX8	A0A0D9QUX8	A0A0D9QUX8_CHLSB	C12orf29		2971.81	3372.92	2927.39	4032.6	3692.78	3741.53	3980.18	2537.24	2489.76	3131.02	3583.06	3549.46	3590.23	3254.59	3395.31	2857.41	3032.02	3329.32	3283.7	2866.45	3639.05	4004.86	4440.17	3988.57	3253.72	4137.23	3269.74	4615.25	3107.08	3980.52	4445.31	3016.87	3038.07	4334.96	3630.83	2741.7	3428.84	2639.65	1897.94	3853.8	2635.9	3992.52	2572.18	3595.21	3214.51
A0A0D9QUX9	A0A0D9QUX9	A0A0D9QUX9_CHLSB	ANK2		5831.25	4236.59	4889.98	3900.01	4090.3	4284.56	4545.94	3349.05	4553.08	4123.95	3845.35	3746.93	3975.77	3854.96	3889.1	4387.17	3962.74	5218.16	4457.5	4306.34	4474.77	3742.97	3686.81	4092.07	4102.12	5631.96	4326.38	4006.59	5474.92	4792.04	3711.6	5019.5	4142.36	3501.97	4250.26	3133.65	2807.59	3306.02	3516.63	4518.19	3143.08	3340.91	3875.91	3322.33	5123.64
A0A0D9QUX9;A0A0D9R4V4	A0A0D9QUX9;A0A0D9R4V4	A0A0D9QUX9_CHLSB;A0A0D9R4V4_CHLSB	ANK2;ANK3		3648.18	1694.55	3848.65	4371.11	3539.88	3821.11	3427.62		2818.73	4606.74	4123.63		3154.61	3076.26	4028.3	2978.73	2558.37	4406.27	3637.5	2725.9		3656.69	4085.36	4186.99	3727.32	4870.58	5153.61		4670.7	3847.03	5153.52	2115.83	4005.52	5057.89		4419.82	4795		4105.02	4149.86	5595.69	3534.44	4323.39		3671.41
A0A0D9QUY2	A0A0D9QUY2	A0A0D9QUY2_CHLSB	E2F4		1287.21	811.564																894.865							1064.26	977.383		929.201										1187.65	1584.42					1271.93
A0A0D9QUY4	A0A0D9QUY4	A0A0D9QUY4_CHLSB	KCTD14		832.898	945.649	1340.16	1182.3	1309.29	1602.56	763.888	1297.94			1325.66	745.047	990.511	831.732	930.261	890.183	599.82	1363.52	716.922	942.743	722.601	1161.12	1040.92		1193.53	733.88	625.895	1198.22	786.128	1014.08	1633.04	997.443	1699.16	1340.77	1105.67	975.541	1589.43	925.243		987.695		739.95	507.614	807.702	1006.87
A0A0D9QUY6	A0A0D9QUY6	A0A0D9QUY6_CHLSB	CDC27		17827.6	15451.9	16577.4	16645.8	18215.2	18282.8	18366.5	14874.4	19118.5	16906.6	14593.2	13946.1	15268.9	15318.4	14426.8	19718.9	17559.4	17711.2	18248.1	16547.4	19908.1	17420.2	17115.8	18903.3	18344.6	15764.7	14281.1	14658	16266.9	16412.5	19237	13963.8	20522	17770.2	17009	19177.6	18013.3	17864.8	15403.3	17312.5	13908.3	15133.9	14703	17124	18302
A0A0D9QUY7	A0A0D9QUY7	A0A0D9QUY7_CHLSB	LARP7		19123	14558.5	16829.5	20351.6	18330.9	17103.7	18859.7	15968.4	19598.8	18553.4	20101.4	18096.8	19447.6	17475.1	19291.6	19732.3	17969.5	20561.1	18396.1	15766.1	18525.8	18830.4	19113.5	21019.2	18839.1	18969.9	16966.8	19293.5	17533.8	17809.1	19201.7	16650.8	20077.6	18320.3	15117.5	18424	18985.3	16763.3	17862.4	17331.8	11394	15924.4	17249.7	17772.2	19273.6
A0A0D9QUY9	A0A0D9QUY9	A0A0D9QUY9_CHLSB	INTS4		13107.3	15163.4	12429.3	15820.7	16446.6	15368.3	15960.8	11343	12224.4	11723.4	15544.5	12919.1	10867.6	14533.3	11528.6	14055.6	15412.8	14456.5	14617.9	15003.2	14189.7	14687.7	14284	14516.4	14071.7	13941.6	11102.4	13765.8	14705.4	15251.6	16269.5	14487.8	14513.3	14842.5	16990	14306.1	15328.1	16535.1	14428.9	16020.5	12369.6	12336.2	11145.9	14389.5	11990.3
A0A0D9QUZ2	A0A0D9QUZ2	A0A0D9QUZ2_CHLSB	AAMDC		5569.45	7324.99	7131.28	6555.47	6172.35	7369.02	3814.44	5193.42	3351.5	3893.15	6858.38	4773.67	4496.06	4364.13	3168.75	10416.5	6999.66	5613.27	4866.54	6646.15	4751.88	4198.03	5699.85	6102.08	3876.2	6655.31	2790.55	5597.02	4431.36	3183.88	7991.69	7501.78	5067.96	5208.62	7690.84	3528.89	5093.4	6135.99	3757.25	4872.6		3836.89	6952.11	5132.66	3407.47
A0A0D9QUZ4	A0A0D9QUZ4	A0A0D9QUZ4_CHLSB	RSF1		11148.1	9777.15	9408.43	10305.5	10443.2	10330.6	9658.49	9337.38	10628.8	9944.45	9386.34	9773.77	11632.9	10491.1	10546.7	9156.85	9621.2	9142.06	10197.6	8277.16	9246.37	10688.1	11210.8	10957.9	9815.12	10419.7	10507.6	10607.9	10747.8	11386.8	10227.3	7706.66	9691.65	9545.98	10499.5	9955.88	9174.52	10098.4	10256	9320.72	6524.39	8530.63	11223.1	10958.9	10314
A0A0D9QUZ5	A0A0D9QUZ5	A0A0D9QUZ5_CHLSB	ITGB3		25292.7	23545.7	25208.9	22048.6	24069.9	25163.7	31905	21199	26374.9	27286.8	20645.9	23564	31803.2	28641.9	33922.9	29473.2	34585.4	37255	24799.9	19295.3	21582.5	25534.2	22374.6	25227.1	30819.9	24450.5	26835.1	24911.3	22059.6	26225.1	27357.2	24796.5	38688.1	25690.7	19936.8	24620.6	30445.6	28516.8	26978	27681.4	20554.9	23624.9	21115.1	19846.7	28576.1
A0A0D9QUZ6	A0A0D9QUZ6	A0A0D9QUZ6_CHLSB	CLNS1A		12858.2	10148.5	9288.18	12013.5	12228.8	12621.3	12825.4	8064.03	15624.5	15583.3	10607.9	9234.6	10801.9	10033.6	12515.8	11821.5	9843.29	11896.3	12365.9	8269.17	13746.6	13430.1	11786.3	13559.1	14485.4	12835.3	16492.7	12114.4	11755	12989.2	14677.2	9101.13	15999.5	12979.8	10893.6	17278.1	10076.5	8736.89	13898	14661.8	17684.5	13954.8	18123.1	10258.1	16736.6
A0A0D9QV00	A0A0D9QV00	A0A0D9QV00_CHLSB	SUPT5H		19777	14042.2	18217.1	17799.8	17870.2	17662.5	18255.9	15480.7	18632.9	18733.4	17032.9	16824	19654.6	17412.7	17066.5	19097.2	16540.7	17195.5	17492	14699.7	18583.2	17789.7	18376.2	17650.8	17536.8	18538.9	19449.7	20196.1	15743.2	20433.4	21238.7	12495.3	19107.3	17592.3	16381	17973	17351.8	15858.8	18331.9	18245.7	18149.7	20608.6	18635.5	17891.7	18783.1
A0A0D9QV01	A0A0D9QV01	A0A0D9QV01_CHLSB	PAK1		4192.01	3159.82	4481.12	4947.23	4910.86	4876.07	4741.43	3875.89	3558.11	3884.55	3063.08	4070.77	5408.53	4033.2	4876.22	5488.87	5136.72	4892.57	4318	3328.13	3924.21	4493.05	5402.28	4746.1	4814.24	5214.98	4273.4	5068.93	4076.63	4646.79	4541.84	3606.35	4703.63	4775.6	4149.72	4496.37	5006.43	4198.27	3976.02	4430	1826.35	2732.51	4037.58	4981.59	4277.4
A0A0D9QV01;A0A0D9R8H5	A0A0D9QV01;A0A0D9R8H5	A0A0D9QV01_CHLSB;A0A0D9R8H5_CHLSB	PAK1;PAK2		8676.44	17740.6	25779.1	25094.5	23919.1	24693.3	29419.1	22105.1	30527.3	29867.5	31910.6	25130	29526.9	25653.7	23562.9	27254.1	20223.6	23313	21933	20747.9	28815.3	26599.3	26800.8	24949.4	29350.1	36805.6	36921	34200.4	21664.9	34649.7	27935.9	14471.6	27229.5	23040.5	23464.6	23779.4	23230.9	25458.2	35630.9	32916.6	20381.6	26105.8	37395.7	30566.1	35060.3
A0A0D9QV01;A0A0D9R8H5;A0A0D9R8X6	A0A0D9QV01;A0A0D9R8H5;A0A0D9R8X6	A0A0D9QV01_CHLSB;A0A0D9R8H5_CHLSB;A0A0D9R8X6_CHLSB	PAK1;PAK2;PAK3		29130.6	13923.1	23600.4	23762	21696.1	26376.5	27680.3	19490.2	33706.4	26233.4	23393.9	25685.1	20260.3	23731.6	23743.6	25742.4	22663.8	21812.8	26817.1	21614	22655.5	26613.8	24232.7	25754.1	28710.8	26520.8	34152.5	25636.5	31169.4	24391.5	21665.1	21047.6	23095.3	25293.5	24777.1	29177.7	26907.3	27738	33695.1	29191.5	35246	35275.7	33101.4	33886.4	31432.4
A0A0D9QV09	A0A0D9QV09	A0A0D9QV09_CHLSB	RPS16		342733	298689	372583	365612	316747	389118	353792	324762	341843	316985	297765	291339	258028	280465	322563	407552	374266	441903	447590	377924	389529	357626	354723	335778	352929	468462	481332	276456	370623	297108	403175	395279	423640	362388	414383	348391	323839	339894	310859	373782	342298	329657	366930	342702	352919
A0A0D9QV18	A0A0D9QV18	A0A0D9QV18_CHLSB	RASSF9		6721.37		5546.96	4042.13	4718.39	7935.95	8070.66	3964.79	5391.89	5835.26	5035.49	5518.37	4243.01	3236.7	5117.33	10401.5	5641.26	4772.63	8510.42	7098.96	7936.57	8050.75	5705.68	5547.05	9599.97	8776.59	7518.02	6504.22	5855.01	4594.4	6299.5		7362.75	8887.42	6158.18	4312.08	8256.88	4214.41	6243.57	6914.52		8761.63	8921.53	5988.55	5938.23
A0A0D9QV23	A0A0D9QV23	A0A0D9QV23_CHLSB			6770.06	4976.57	5779.14	6114.36	6257.83	5931.58	4917.32	5355.66	4686.86	4984.96	4422.19	5105.38	4604.72	4790.11	4423.86	5230.76	6537.91	5301.47	5926.45	5795.7	5513.17	5504.6	5400.84	5016.1	4863.61	4711.71	4597.04	5410.68	5429.44	4352.96	5719.98	5316.23	5097.03	5957.19	6294.98	4433.15	5668.68	4756.51	4334.71	4684.41	5924.51	4354.78	5190.47	5308.9	5067.56
A0A0D9QV25	A0A0D9QV25	A0A0D9QV25_CHLSB	TLK2		5280.71	4489.07	4837.88	3925.47	5019.73	6409.21	4542.93	9368.56	5012.63	6344.03	6277.67	5514.75	5605.87	6221.43	5373.72	4198.79	4585.74	4632.7	4133.03	4281.8	5672.84	6016.06	5484.88	5880.25	5133.69	4934.5	4939.73	6548.96	6732.49	7450.13	4533.6	4268.62	4447.65	5603.31	4511.19	3415.96	6242.99	6085.03	4535.9	6986.99		4562.44	4720.58	7614.09	6926.46
A0A0D9QV25;A0A0D9RQW9	A0A0D9QV25;A0A0D9RQW9	A0A0D9QV25_CHLSB;A0A0D9RQW9_CHLSB	TLK1;TLK2		6763.54	5930.25	6081.78	4112.18	5565.38	6957.96	11401.7	5352.28	4961.21	7017.88	7583.13	7829.02	6419.3	3822.44	5509.57	4699.98	5203.28	5456.88	9128.32	6761.76	7606.74	7209.28	5991.77	6041.1	8459.68	10734.4	7096.32	7224.41	8392.29	5313.18	9051.34	5424.12	6640.14	8414.11	6183.49	3841.97	8673.59	8440.79	6212.02	12496.2	4687.42	5829.92	6949.48	8636.99	7873.68
A0A0D9QV26	A0A0D9QV26	A0A0D9QV26_CHLSB	FHOD1		6899.19	5898.64	6070.92	5868.92	5998.37	6484.74	7648.55	5146.88	7344.52	7509.25	6437.8	5281.93	7316.71	6169.46	8019.95	5334.65	7105.03	7509.73	6757.26	4653.95	7110.73	7184.84	5957.64	6513.39	8401.85	5840.49	6484.41	7102.49	6403.22	7224.47	6765.43	5027.86	7560.73	6042.19	6306.89	7104.76	7580.73	7307.67	6955.18	6852.75	5993.45	7345	6173.21	6176.49	7590.27
A0A0D9QV32	A0A0D9QV32	A0A0D9QV32_CHLSB	TANC2		2366.13	2476.81	1991.41	2172.89	2230.52	2076.98	2436.03	2059.15	2593.22	2411.37	1189.48	1518.93	2344.58	2116.72	2979.09	2933.88	2577.62	2601.51	2438.18	2139.01	2404.54	2619.43	2181.48	2832.53	2525.42	1675.43	2256.05	2684.62	2997.95	2535.47	2811.65	2465.25	3760.96	2412.7	1781.22	2740.85	2223.08	1370.53	2500.33	2317.22		2589.48	4511.14	2559.57	2667.14
A0A0D9QV33	A0A0D9QV33	A0A0D9QV33_CHLSB	SLC6A15							1399.59	1962.28				1354.36			1203.12	1235.07			697.545		1574.56		1031.17	1125.03									1861.6	1662.58				1013.82			1108.23				1048.78	1511.07
A0A0D9QV37	A0A0D9QV37	A0A0D9QV37_CHLSB	ZFP36		3060.94		2521.11			3392.88	3805.85		4286.46	3183.75			2314.41					3543.9			4341.68	3528.02		2342.13	4612.07		6137.19	4721.48	3279.99	4729.59			3301.12	3033.14		5014.51	4113.55	2713.74	5935.34	4697.81		5369.19	8533.44	3691.69	8163.96
A0A0D9QV39	A0A0D9QV39	A0A0D9QV39_CHLSB	MED29		3518.52	2387.73	3718.38	3830.51	3362.7	3364.96	3547.35	2535.78	3071.92	2052.42	2604.57	2960.91	2941.89	2287.58	3042.39	3675.65	2645.73	3830.83	4689.47	2909.43	3730.69	3757.98	3927.13	3220.92	3262.41	2992.45	3949.98	2939.86	2801.51	3400.93	3824.46	3024.84	3249.96	4032.69	3270.12	4229.28	3662.43	2991.77	4290.81	3297.88	1432.1	3055.77	3912.72	2450.79	2665.19
A0A0D9QV41	A0A0D9QV41	A0A0D9QV41_CHLSB	CCDC59		7289.03	6021.91	7064.04	8291.82	8601.77	9601.28	8562.21	5659.55	7458.69	7256.5	7827.44	7642.81	7630.23	9383.05	8267.89	9450.55	10533	9630.08	8773.56	7800.86	8307.79	8435.67	8199.23	9103.32	7401.88	8778.35	7026.54	7056.07	6471.15	7156.8	8211.16	8282.65	11802.2	7146.5	8500.56	5581.4	10630.7	9174.26	7635.88	6733.42	5481.83	6156.81	6632.69	7066	9511.79
A0A0D9QV43	A0A0D9QV43	A0A0D9QV43_CHLSB	ACE		13553.4	15329.7	15965.9	18097.6	16068.9	16177.5	13927.9	12440	13171.3	10972.6	13265.2	13106.9	10380.9	10651.4	11910.2	13545.6	14553.9	13613.4	18550.7	15480.8	14971.5	14310.8	15210.1	14243.6	13586.9	12495.3	11679.5	11619.5	11624.7	10655.5	14032.6	12369	12740.8	15587.3	15242.3	10942.7	13644.7	14551.1	8701.36	12819.2	9321.22	9681.57	10896.1	13896.1	12167.2
A0A0D9QV45	A0A0D9QV45	A0A0D9QV45_CHLSB	PAF1		13912.2	9474.42	12749.2	10902.7	10271.2	11503.8	15050.9	9701.64	13367.1	13944.3	10530.8	10218.7	11309.3	9116.68	10867.9	14718.2	9916.16	15093.5	11860	9284.13	14502.2	12872.1	10778.2	12844.6	16308.7	11205.2	16771.6	12856.7	9744.7	10815.4	14296	8971.31	15979.9	11679.5	10042	17137.1	13209	10391	13777	13970.6	16025.1	18918	15399	11367.2	15379
A0A0D9QV46	A0A0D9QV46	A0A0D9QV46_CHLSB	TACO1		40180.2	48586.6	46916.8	45820.4	52132.8	50675.5	43703.2	49626.7	39707.5	37961	61769	57488.2	47907.4	50626.6	49833.7	45133	46606.1	43536.7	52353.6	48237	44656.8	50635	48908.8	46716.3	45742.6	46535.4	37005.2	54599.4	57805.6	51175.1	51835.9	49923.1	42196.8	45166.5	49346.3	37434.3	49084.2	56165.1	39094.9	46263.6	23406.2	32179.9	50422.9	61164.7	47731.6
A0A0D9QV47	A0A0D9QV47	A0A0D9QV47_CHLSB	SAMD4B		11992.5	8428.53	9913.33	12558.6	9928.9	12004.2	9879.2	9970.65	8698.03	9828.6	13620.6	10166	9145.97	8691.17	9284.49	12269.4	10459.9	9855.16	12540.2	9451.02	10561.2	10886.2	9327.91	8579.37	10916.8	9983.25	11259	9987.16	11296	8287.76	11322.2	11464.2	10226.7	10327.6	7375.13	11032.4	11328.5	9599.01	9571.38	11112.5	7296.92	9889.8	11654.2	9558.33	11173
A0A0D9QV47;A0A0D9RQN4	A0A0D9QV47;A0A0D9RQN4	A0A0D9QV47_CHLSB;A0A0D9RQN4_CHLSB	SAMD4A;SAMD4B		2307.73	2337.84	2161.41	2514.13	1835.01	2232.46	1958.61	1931.99	1233.61	1128.91	1792.52	2077.66	1312.52	1202.05	1769.62	2157.21	2296.98	1983.47	2627.38	2213.85	1794.32	1407.06	1889.05	1720.73	1469.67	2834.29	2247.56	1884.76	2349.87	890.532	1909.69	2005.27	1467.64	2141.46	2619.93	804.766	1966.24	1984.44	2041.77	2493.06		1816.15	2073.29	1522.89	1321.6
A0A0D9QV48;A0A0D9RW94	A0A0D9QV48;A0A0D9RW94	A0A0D9QV48_CHLSB;A0A0D9RW94_CHLSB	MAP3K2;MAP3K3										1738.99	2431.84						2294.48		841.304	1970.4		2200.64			2276.06	1747.14	1973.55	2780.04		1910.48	1997.88				2533.05		2756.43					3426.91	3922.22	1326.14	1286.83	1802.52
A0A0D9QV49;A0A0D9RAF8;A0A0D9RP75	A0A0D9QV49;A0A0D9RAF8;A0A0D9RP75	A0A0D9QV49_CHLSB;A0A0D9RAF8_CHLSB;A0A0D9RP75_CHLSB	PPFIA1;PPFIA2;PPFIA4		6765.12	5767.1	7112.45	6375.64	6641.13	7203.43	6392.62	3883.41	7786.28	8273.78	7556.1	6516.68	6851.38	6689.09	7259.19	7419.81	5507.53	7902.57	7440.97	4225	8348.02	7037.96	5716.44	7850.62	7563.79	8063.92	9170.03	6243.67	5713.21	6825.08	9793.8	4225.75	7009.61	6939.05	6356.85	6401.7	6390.25	5828.37	6901.26	6966.94	9020.05	8311.8	6200.07	5993.14	7352.19
A0A0D9QV49;A0A0D9RAF8;A0A0D9S351	A0A0D9QV49;A0A0D9RAF8;A0A0D9S351	A0A0D9QV49_CHLSB;A0A0D9RAF8_CHLSB;A0A0D9S351_CHLSB	PPFIA1;PPFIA2;PPFIA3		7999.61	9304.86	9512.8	9602.7	9210.83	12251.9	9983.58	8535.79	8972.06	11857.1	10727.7	11373.5	9954.49	8589.08	11514.7	9830.59	9248.14	9617.72	10137.7	9725.31	8981.85	11335.4	8426.06	10141.6	10636.3	10344.3	8420.9	8723.5	11262	9716.95	10972.8	10121.4	9869.31	10467.5	10398.2	4995.18	10773.1	9132.91	6101.11	11774.7	5923.08	5799.65	9995.12	10435.6	11082
A0A0D9QV50	A0A0D9QV50	A0A0D9QV50_CHLSB	CAPN5		7199.27	9592.25	7696.8	8548.97	8298.41	6562.07	6783.86	9064.73	7073.21	6800.3	8897.48	9152.77	7825.9	7674.99	7775.02	8191.43	8449.23	8500.91	7704.81	8336.83	6991.45	6775.45	7568.32	5872.72	7748.51	8278.51	7627.28	6153.83	6587.56	6415.26	7151.67	8166.17	7085.05	5685.79	7346.66	4928.88	5685.48	8572.29	6215.35	7371.82		7044.38	5678.7	5884.79	7503.67
A0A0D9QV51	A0A0D9QV51	A0A0D9QV51_CHLSB	LIMD2		9993.32	13054.9	11001.1	10347.6	7753.9	9919.05	7404.46	8862.3	5321.91	7294.63	7513.64	8692.75	7542.43	5880.62	5485.63	16006.2	11323.6	11471.7	11881.4	11857.2	9331.8	8838.31	6869.72	6873.4	6802.55	8476.25	5801.8	7171.71	7242.08	5442.19	9964.44	15723.2	8555.98	10287.2	12365.1	7413.66	6947.45	8598.98	6206.05	8839.07	6266.62	4416.22	6931.79	6221.4	4774.25
A0A0D9QV52	A0A0D9QV52	A0A0D9QV52_CHLSB	GMFG		903.015						997.088		1712.6	988.166			1100.19											192.414	980.61					979.297			877.832						889.351						753.619
A0A0D9QV58	A0A0D9QV58	A0A0D9QV58_CHLSB	ACSS3		9041.81	7633.69	6613.69	6875.42	8026.69	8122.82	7847.33	6775.9	7339.98	7560.53	6001.8	5864.54	7647.84	7486.55	8287.75	7580.88	7147.34	9166.04	6987.04	8324.72	8745.45	7816.53	5823.26	7939.65	7238.59	6401.85	7466.27	7221.9	7579.4	8261.41	8325.86	5484.97	8806.87	8483.34	7306.5	10522.6	8464.83	6796.42	6688.25	7246.28	14721.9	7408.81	6579.2	7578.91	8802.81
A0A0D9QV59	A0A0D9QV59	A0A0D9QV59_CHLSB	EMSY		1574.69	1371.91		881.774		1188.23	1776.92	760.432	1300.05	1838.21		2202	2061.8	1620.21		1185.29	2327.66		2267.12		2038.22	1425.81	1853.89	1584.27			1000.16	1595.87	1874.63			1080.29			952.015		2281.18	1530.75					1442.15	1431.96	1300.6
A0A0D9QV60	A0A0D9QV60	A0A0D9QV60_CHLSB	STRADA			9514.19	8388.67	8123.92	7229.05	6866.17	5920.82	7266.03	4364.99	5402.67	7980.16	7395.98	6144.57			6377.52	6965.85	6400.65	8188.89	8287.93	6207.36	6994.8	7676.19	5062.17	3588.69	6886.42	4024.29	5834.99	6340.38	7222.52	5901.3	9153.11	5499.12	8269.67	7365.15	3657.04	7406.95	7819.66	3482.46	7474.82				7598.15	5075
A0A0D9QV61	A0A0D9QV61	A0A0D9QV61_CHLSB	LIN7A			1828.47	1742.52	1651.94	855.177	596.625	851.219	1615.05		1319.22	1676.25	1627.88	859.009			1176.72		1364.07	1471.89			790.209	993.988	1159.56	943.507			1729.48	1413.17		1046.77	2018.13	1232.04	1349.39	1262.6			1389.32					936.991		1183.94
A0A0D9QV61;A0A0D9QYU3	A0A0D9QV61;A0A0D9QYU3	A0A0D9QV61_CHLSB;A0A0D9QYU3_CHLSB	LIN7A;LIN7C		10270.8	9540.02	12248	12267.8	11090.3	10963.6	9134.52	13102.8	10032.2	9194.04	14501.6	11908.9	12494.9	11740	12611.7	13817.1	11382.9	10744.8	10741.2	10987.7	10635.5	11880.4	11382.6	12172.5	10647.3	11566.5	9707.41	10905.4	10997.9	10207.9	9851.05	11461	9614.94	11371.7	11184.7	10987.1	10587.2	11178.2	9718.51	10205	12158.7	9751.92	11283	9198.1	10945
A0A0D9QV61;A0A0D9QYU3;A0A0D9S348	A0A0D9QV61;A0A0D9QYU3;A0A0D9S348	A0A0D9QV61_CHLSB;A0A0D9QYU3_CHLSB;A0A0D9S348_CHLSB	LIN7A;LIN7B;LIN7C		3474.3						5422.27		2883.75	6673.17			3903.92		3583.56						5617.09				5984.95		16484.1									10172.8			10471.6		13636.4	20769.5
A0A0D9QV66	A0A0D9QV66	A0A0D9QV66_CHLSB	CCDC47		28620.2	36153.8	34365.7	27971.4	35958	38197.3	48486.9	24229.5	38894.7	33719.2	28829	30883.1	51888.2	51932.9	58460.4	34957.4	54218.1	54032	32656.6	32458	30248.5	36239.1	34319.9	35318.4	45118.4	35690.4	36109	34261.2	38812.9	35593.4	33577.8	36371.2	62449.3	30882.5	32453.6	31129.3	49209.2	53291	37864.2	41634.4	27126.3	29196	26197.9	31647.1	39642.2
A0A0D9QV68	A0A0D9QV68	A0A0D9QV68_CHLSB	DDX42		46143.3	34984.5	43299.2	43719.1	38449.3	41799.4	40585	33827.2	39365.3	42545.1	40918	41431.8	42085.8	40003.4	42638.7	44458.1	37876.3	42127.2	43811.9	36862.4	42514.5	43688.2	42595.6	42657.9	42026.6	42641.4	42849.7	45001.3	44976.7	40163.6	39489.7	32799.1	37100.3	40307.2	39396.3	38117.8	41549	37383.3	36344.7	43785.7	33718.5	35824.7	47538.4	44268.9	46683.6
A0A0D9QV75	A0A0D9QV75	A0A0D9QV75_CHLSB	ATP6V0D1		11270.3	8812.89	9015.2	8748.22	9026.98	10279.4	9059.63	6859.92	10667.3	9940.24	10234.6	9935.14	9372.09	8827.03	8588.33	7897.24	8500.6	9766.85	7469.56	7517.09	8609.33	9236.59	7932.14	8635.69	9659.98	8392.67	10921.9	8073.84	8137.32	9217.86	9756.38	7086.53	10713.2	9364.17	9867.51	11559.6	8165.09	7808.27	9986.32	8042.06	24972.5	9743.91	6596.51	8606.68	10536.5
A0A0D9QV78	A0A0D9QV78	A0A0D9QV78_CHLSB	UVRAG		6907.46		5478.7	5373.42	4222.88	7114	7534.55		5002.54	6225.81			5631.95		5088.89	6184.85		5173.08	7361.67		6452.74	6674.96	4606.92	6892.53	8395.7	6910.21	5704.18	7890.41	6212.17	5947.45	9092.58	6989.9	5226.61	7012.69		4229.51	7045.99	4707.84	6012.86	7914.47		5731.96	5712.1		4970.03
A0A0D9QV80	A0A0D9QV80	A0A0D9QV80_CHLSB	RIPOR1		4950.09	4480.41	3995.37	4829.3	4565.51	4221.51	4790.66	4342.13	4116.87	4251.45	6076.26	4265.42	3853.52	4798.47	3644.49	3922.6	4814.18	5258.26	4631.1	4710.57	4844.36	4902.75	3991.08	3648.03	4883.08	3920.69	3015.17	4421.61	4862.2	3824.14	4109.6	4565.16	4249.63	4201.89	3427.15	4412.27	4855.05	3767.4	2928.5	4714.03	3409.58	4622.95	2676.29	3809.43	3553.24
A0A0D9QV84	A0A0D9QV84	A0A0D9QV84_CHLSB	SERPINH1		228618	200991	205539	197951	205271	211480	181165	177474	184737	188107	195980	193792	207230	198975	192846	222732	214580	214735	215669	194159	216504	195133	189348	187903	201859	192218	169104	202180	206824	193987	229730	198340	210157	225328	217845	166795	197504	195179	166570	208380	137119	157369	195594	202773	195186
A0A0D9QV86	A0A0D9QV86	A0A0D9QV86_CHLSB	CTCF		7000.29	5735.48	6449.94	5908.95	7155.65	7275.1	8132.23	5753.86	6906.99	6663.44	6843.46	5806.08	7647.76	8222.01	9237.23	7170.18	8552.97	8599.55	8375.19	6136.98	7246.51	7137.18	6595.29	7171.89	6706.18	7134.01	7565.36	7369.12	7269.64	8399.04	6989.58	7675.72	8478.28	6826.29	7277.1	7284.59	9289.5	8457.5	8267.08	7879.05	7268.63	7587.7	6794.48	7133.2	8623.69
A0A0D9QV87	A0A0D9QV87	A0A0D9QV87_CHLSB	PAK4		7650.83	8107.01	7149.91	7241.49	8024.09	7705.35	7593.81	7730.45	8712.59	7193.46	7178.02	6827.96	7258.83	6338.33	7213.69	7285.43	7233.23	7226.38	6927.4	6920.04	6617.09	7751.67	7389.6	7510.25	7441.3	6696.09	6598.75	7428.48	7270.61	7562.57	7136.4	8233.23	7496.72	7584.67	7887.96	8086.56	7522.69	7616.85	6999.26	7345.6	5835.33	5693.37	7547.63	7237.93	7502.08
A0A0D9QV93	A0A0D9QV93	A0A0D9QV93_CHLSB	RPS3		289657	211254	293344	287719	272815	305628	303565	208425	284537	307216	275471	263113	258951	263190	272585	321230	266342	349139	333040	243853	338954	345483	295348	316510	298476	314845	331664	312830	295229	272112	358510	223063	357430	362565	309194	305848	298885	279917	295931	340294	321184	333454	365657	266798	301580
A0A0D9QV96	A0A0D9QV96	A0A0D9QV96_CHLSB	FTSJ3		37378.5	35989.8	38000.5	38181.3	33710.8	33486.5	34840	30237.8	34148.4	34134.6	35581.7	34395.7	35387.8	35506.2	37218.3	41483.6	37970	41815.9	36898.8	32194.3	38352.2	33271.3	32632.2	33862.1	34461.7	36134.3	34748	31136.4	31645.8	28126	37981.2	40244.7	41949.7	39815.1	33649	35600.2	34955.2	31756.6	33432.2	34903.8	33381	32411.2	32962.7	30648.3	34619.1
A0A0D9QV98	A0A0D9QV98	A0A0D9QV98_CHLSB	GAR1		130122	101036	94639.7	99938.1	123353	88500.7	131531	98303.6	98393	108300	125836	133089	131330	120409	134908	88362.1	82089.3	103757	81169.2	65194	96262.3	85280.9	79378.7	82314.9	97246.3	82410.4	83365.9	96662.1	86955.9	88370.5	89814.9	42667	93656	74109.6	72616.6	72664.1	85304.6	57571.8	78113.7	81076.4	53213.1	62473.5	72282.9	60515.7	74848.9
A0A0D9QV99	A0A0D9QV99	A0A0D9QV99_CHLSB	PSMC5		112459	94130.6	106005	113694	111257	109450	105650	104548	117971	121199	105387	106456	109978	101136	116882	132695	98437.8	122360	108296	99810.2	120283	114284	114103	120217	112998	116936	113641	113435	113367	124522	115427	102124	119260	112491	92832.7	103196	113186	107463	116797	107696	104593	92613.7	114892	108052	114983
A0A0D9QV99;A0A0D9QUH5	A0A0D9QV99;A0A0D9QUH5	A0A0D9QUH5_CHLSB;A0A0D9QV99_CHLSB	PSMC5				11205						19603.5	31354.9						10248.3		10024.9	10441.7						14749.9	16193.4		15423.6		18113.6				27662			16229.9			22404.2	65392.8	35196.4
A0A0D9QVA1	A0A0D9QVA1	A0A0D9QVA1_CHLSB	CFI		6364.19		4424.3	2888.45	2702.15	2250.78	3167.59		4172.04	3336.63	2725.45	1984.49	2426.92	3343.73	3371.27	6640.68	5797.04	6268.31	3361.43	2639.2	3074.27	2925.59	2738.01	2707.43	2324.82	3537.23	5196.64	3762.41	3486.17	3033.75	7102.28	4431.48	9079.67	2746.83		5620.26	3232.14	2819.44	2933.4	3863.68	72359.1	22668.9	6100.06	3155.7	3483.74
A0A0D9QVA2	A0A0D9QVA2	A0A0D9QVA2_CHLSB	SMARCD2		5476.99	5401.9	7809.13	6888.38	5331.94	6176.78	5133.03	6799.32	5915.23	5379.08	6312.75	4918.69	5224.99	8753.07	4222.7	5899.6	7046.71	4575.33	7308.31	6582.04	5696.37	6373.89	6589.4	7292.75	4513.81	5923.88	6033.04	5160.31	5913.75	6984.78	4870.62	6142.52	8118.53	7667.89	7080.02	7181.05	6979.74	8240.74	5131.72	5747.95	4729.87	5745.97	7948.02	4990.93	7130.16
A0A0D9QVA5	A0A0D9QVA5	A0A0D9QVA5_CHLSB	CASP6		22616.5	25885.3	20602	22294.6	18365.9	19460.8	16104.4	19316.6	15874.1	18247.5	17359.7	18997.8	14902.7	19399.2	19306.1	18258.8	22572.4	16348.2	20129.2	20807.1	16466	16084.6	18425.9	15223.4	16931.2	19026.3	17618.2	16738.7	16671.1	15738.6	16962.7	12334.9	18284.2	16435.4	16096.8	10198.7	15362.2	14665.7	11395.9	20165.9	15438.7	12938.8	16235.1	14442.6	14591.5
A0A0D9QVA6	A0A0D9QVA6	A0A0D9QVA6_CHLSB	MRPS12		7038.59	4970.44	10211.9	5354.06	6687.28	6254.42	7600.7	4722.41	6061.5	8943.92	6804.36	6462.72	7856.05	10559.6	9601.32	10259.6	8350.4	14373.2	6863.44	5429.59	7115.21	6471.5	4737.27	8729.74	8384.97	8611.19	6437.56	6021.79	6912.36	9333.39	10183.3	6114.88	8642.01	8026.94	6034.52	7683.88	5746.26	4936.41	8181.7	5928.66	8379.34	6016.99	10191.9	7562.29	9564.02
A0A0D9QVA7	A0A0D9QVA7	A0A0D9QVA7_CHLSB	SARS2		14701.1	9767.43	12976.7	12143.9	12276	14655.6	14421.7	9706.63	15517.1	14575.3	11856.7	10558.5	13669.2	12042.6	14873.5	12777.9	11713.6	14233.4	13838.8	10208.2	14960.4	13208.1	11579.3	13724.9	13724.3	13474.6	11586.7	13578.1	14082.7	15458.7	12887.8	9433.7	14151.7	14413.4	12266.4	14455	13618.1	13828.2	13040.6	13178.2	9169.72	12585.2	13055.3	14873	15831.9
A0A0D9QVB0	A0A0D9QVB0	A0A0D9QVB0_CHLSB	NFKBIB		2625.3		2967.64	3626.53	3475.88	3540.52	4880.45		3869.16	3257.53	3364.32	3124.98	3543.65	2182.42	3733.07	5295.8	3162.81	4003.1	3695.37	2748.13	4129.79	3756.07	3198.43	4463.59	4334.84	4011.73	4158.72	4540.99	3825.53	3128.17	4283.23	3136.27	3999.25	4505.73	2972.05	2548.59	2793.11	2436.9	3955.49	4683.74			7150.74	2869.18	4978.99
A0A0D9QVB3	A0A0D9QVB3	A0A0D9QVB3_CHLSB	MCUB		4352.73	8891.82	6420.43	5347.18	6716.02	5079.9	9199.68	6483.06	4572.56	3371.63		5481.68	6941.82	7472.57	10291.4	5742.68	12709.8	9786.19	5828.91	8083.65		4236.45	4879.56	4901.34	6769.62	5048.33						12620.3	6826.62		6290.5		9013.17	10473.9		5546.54				4720.22	5236.11
A0A0D9QVB4	A0A0D9QVB4	A0A0D9QVB4_CHLSB	SEC24B		27094.6	20602.1	22173.1	25779.6	23745.4	24468.1	25713	24740.4	25640.1	25031.8	27608.3	25705.4	27609.9	24020.5	26446	23138.9	22022.9	24091.4	23466.9	23680.8	25583.7	25266	24849.5	24596.1	25891.5	26896.8	26545.5	26752	29684.3	26431.5	22027.6	20913.4	23514.8	23909.3	22669.7	23981.9	24971.6	24449.3	26623.6	27624	23839.3	25697.7	27114.3	29330.8	27964.9
A0A0D9QVC3	A0A0D9QVC3	A0A0D9QVC3_CHLSB	HNRNPL		152246	112594	136261	149149	137768	142342	149387	113299	156343	158142	152957	140924	148453	135173	143091	145007	113196	138160	135406	117884	147599	153951	150811	154819	151846	150846	164876	152750	136400	148806	152050	117671	136201	147618	128134	145896	137859	113743	147895	159341	131480	147600	165375	131940	150461
A0A0D9QVC6	A0A0D9QVC6	A0A0D9QVC6_CHLSB	ARRB1			1996.91	2294.74	2940.24	3405.58	4959.45	4264.13	2682.1	3453.6	4091.32		3000.07	4022.66	4281.42	4793.02	3589.95	3517.4	4874.91	3611.44		5223.49	4435.2	3321.44	3284.05	5361.67	5801.66	7201.6	4181.64	4389.56	3098.01	3808.8		4303.85	3791.19	2828.28	4243.08	4722.56	4786.99	4069.04	4102.82	3830.05	4489.66	5464.59	4148.71	5263.77
A0A0D9QVC7	A0A0D9QVC7	A0A0D9QVC7_CHLSB	NUTF2		44992.9	49502.5	44760.4	47278	45691.1	44953.3	39160.2	50687.8	44142	46346.5	48595.3	39564.4	46338.4	50557.6	41306.4	44978.3	40447.2	40548.5	38625	42402	38201.1	37553.5	46664.2	44693.9	41975.4	48670.7	49165.9	41280	41593.6	41997.7	40151.4	44197.4	39611.5	35234	46284.4	34902.6	39405.8	42122.1	44256.3	46465.1	45389.2	42313.4	41542.9	40684.9	41267.3
A0A0D9QVC9	A0A0D9QVC9	A0A0D9QVC9_CHLSB	PPP1R12A		37041.9	27045.4	32663.7	35151.9	36054.3	36505	35099.6	31279.9	37587.8	36068	37127.8	35787.4	36677.1	33807	37848.1	38953.8	31768.5	34846.2	35434.9	34842.1	36499.9	36140.5	37460.6	39071.5	35754.1	40701.4	40526.4	36027.5	36071.2	39308.4	35082.1	29750.3	38047.3	35090.9	35425.6	37990.7	34908.3	33236.2	38226	35356.5	31801.7	36047.7	42212.9	37119.5	39695.5
A0A0D9QVD0	A0A0D9QVD0	A0A0D9QVD0_CHLSB	ECH1		15943.9	12700.5	12681.1	11929.1	11672.7	10324.1	9951.93	11225	11521.7	10865.6	11802.1	11118.4	11588.7	12390.3	12217.7	15403.9	12071	14148.7	11862.6	13073.3	12799.5	11417.6	9224.55	10426.4	10831.1	11484.9	10690.4	11414.4	13182.6	12172.4	15379.1	15151.2	14314.4	13377.4	12361.6	13441.4	11668.8	12591.5	10427.6	12112.6	14476.6	14012.7	13250.9	12837.3	12368
A0A0D9QVD3	A0A0D9QVD3	A0A0D9QVD3_CHLSB	EDC4		33060.3	28319.9	32327.9	30616.2	31449.5	31177.8	32151.3	27247	33512	33402.3	34208.6	30813.7	34751.3	34060.9	32979.1	35003.8	29923.1	33189.3	30145.4	30011.1	32520	32897	35289.1	35165.7	32580.2	30785.6	30454	34784.5	33747.3	36730	34478	25349.5	32478.6	31751.5	31987.8	30756.8	31396.7	31620	31631.8	32358.7	24068.9	27510.6	32271.5	33420.1	32017.6
A0A0D9QVD5	A0A0D9QVD5	A0A0D9QVD5_CHLSB	PAWR		27871.3	21763.4	25235	27114.6	30676.3	28582.1	33493.5	27213.1	35600.8	33735.1	27962.1	30566.5	33487.7	29685.5	29128.5	30327.9	25244.1	25440.5	30351.4	24052.7	30445.5	32339.8	33907.3	36818.9	34087.9	29756.2	29881.7	31382.4	29312.8	34358.5	28536.2	20469.3	28374.7	30089.3	27696.5	32862.3	30068.1	28052.9	35719.5	32972.2	23470.6	31924.6	44271.6	29967.8	32923.5
A0A0D9QVD7	A0A0D9QVD7	A0A0D9QVD7_CHLSB	SPCS2		8188.1	8848.33	10532.6	7815.66	11317.6	11548.6	14212.2	7496.64	8902.34	10722.3	8128.54	5686.42	16411	19057.4	20584.9	10259.1	15956.4	24120	8394.38	9384.09	9065.87	9001.05	7997.83	11037.3	13444.1	10817	11631.9	7504.43	8308.2	9547.7	14782.2	11946.3	27573.8	9642.3	7762.76	9067.02	17035.7	13918.1	13816.9	10137.5	11324.1	9540.3	7853.41	11075.5	15010.3
A0A0D9QVE6	A0A0D9QVE6	A0A0D9QVE6_CHLSB	HADH		73294.2	56025.8	62534.5	60910.9	62703.6	63029.1	54912.9	57099.9	61935.9	60786.8	58119.9	59772.1	66995.6	66987.8	65385.2	62624.8	59003.9	63509.3	73449.9	61242.6	68989.4	65937	56480.5	63363	63239.6	62330.3	53635.2	74728.4	71807.5	67379.1	69879.6	63427.4	66444.4	70594.3	69395.8	55319.2	68795.6	69593	58601.3	66798	45845.7	44061	61336.3	75026.2	70381.9
A0A0D9QVE7	A0A0D9QVE7	A0A0D9QVE7_CHLSB			5149.38	4290.33	5791.64	6079.32	4957.27	5661.48	5023.16	3606.39	4555.37	3799.6	3992.26	5776.67	3200.22	3969.99	3685.66	4570.92	4937.4	4602.92	5133.79	4082.37	4806.2	4317.03	5474.36	4189.9	3611.56	3284.69	3538.73	4388.02	3039.5	3856.63	5762.57	4018.04	4274.34	3910.95	5028.55	2845.22	4283.99	4471.39	4310.44	4318.29		3809.77	4180.08	4765.67	4345.29
A0A0D9QVF0	A0A0D9QVF0	A0A0D9QVF0_CHLSB	PAPSS1		25139.4	21800.8	23965.6	27256.4	25079.3	22622.2	22505.4	30376.2	22967.3	22496.5	23321.8	26393.1	25570.2	23806.1	23758.8	23433.8	24216.2	23806.2	24282.8	26357.6	22509.3	21646.3	27130.4	24495.7	22825	22139.6	22319.8	25323.5	24658.2	25961.7	23795.3	25569.6	22146.9	23640.2	27995.7	22426.1	23382.6	22791.3	20114.7	20790.8	21803.3	23526.7	22936.2	24697	21366.1
A0A0D9QVF1	A0A0D9QVF1	A0A0D9QVF1_CHLSB	PSMB10			2323.49	1879.9	2217.32	2919.15	2200.3		1925.63	2021.12	1292.36		2262.35	2436.9	1930.06		1900.28	2772.71	2056.12	1844.11		2229.5			2117.41	1554.21	1978.02		2208.19	2620.63	1877.89		1803.39	2345.19	1772.42			1780.4	1973.25	1523.45						1975.34
A0A0D9QVF5	A0A0D9QVF5	A0A0D9QVF5_CHLSB	AIMP1		73915.9	66981.9	58612.2	70135.1	62533.6	69099.1	67640.5	65928.2	76511	74478.5	68979.6	67746	72219.8	66800	74386.1	63393.2	58299.2	69563.6	63623.8	68578.8	72518.2	70513.3	73105.3	71911.1	73442.9	76029.1	80615	68878.3	73276.1	77406.4	66327.3	59620.4	65869	66375.6	72141.4	81745.7	69206.5	74137.2	86669.8	69148.7	72779.6	75152	83008.8	64578.8	81905.6
A0A0D9QVF7	A0A0D9QVF7	A0A0D9QVF7_CHLSB	TBCK		6170.71	5592.92	6549.72	6092.96	5803.92	6098.69	6267.81	5804.43	5601.96	5310.56	5642.83	5294.21	6859.68	5642.31	6922.31	6087.5	5904.18	5608.66	6131.44	4947.5	5866.88	6801.1	6723.95	6264.25	5876.61	5853.47	5144.48	6309.95	5700.21	5639.08	6490.74	5376.5	5335.75	5989.59	6294.41	4698.2	4897.44	6248.5	4922.8	6487.12	8545.38	5828.52	6221.25	6303.38	5945.72
A0A0D9QVG0	A0A0D9QVG0	A0A0D9QVG0_CHLSB	RNF169		1773.51	946.701	1651.58	1299.22	1931.54	1385.17	928.802	1194.1	1540.34	907.426		1053.28		723.907		1837.49		1569.91	1796.43	2044.84	2283.77	1537.38	1221.07	1296.95	1110.65		933.615	385.578	970.363	1018.11		1787.34	1219.44		1663.4	1584.1	1419.26	1131.54	1346.56	1695.98	2028	1218.6	1737.07	1057.48	1765.62
A0A0D9QVG1	A0A0D9QVG1	A0A0D9QVG1_CHLSB	NPNT		10555.1	9819.71	9241	12836.8	15389.7	13405.6	10807.9	12488.8	11157.7	8767.63	13955.4	13575.2	11435.1	11151.9	11687.1	13097.6	9009.57	8998.32	11757.4	12769.8	11668.4	12515	16541.3	13117.3	10732.2	12973.9	10937.4	12170.9	10895.7	12101.1	8263.14	7056.66	6386.65	13294.2	13629.5	11404.3	11187.2	14027.2	13046.1	10112.7	5060	7346.03	12210.9	10992.2	10358.9
A0A0D9QVG5	A0A0D9QVG5	A0A0D9QVG5_CHLSB	GSTCD		5610.8	4884.85	4982.04	4913	4763.34	4775.99	5965.85	5805.1	5105.81	4952.29	5251.9	5243.81	5174.69	5807.28	5453.83	5117.61	4999.48	5233.16	5419.01	4442.56	5897.17	5437.97	4873.06	5961.44	7437.16	4782.3	4752.74	5613.59	5603.58	5396.78	5865.64	4736.01	4881.53	6386.14	5000.83	4781.07	5087.83	4988.04	5632.29	7063.93	7242.35	5828.35	6033.01	6251.51	6538.89
A0A0D9QVG6	A0A0D9QVG6	A0A0D9QVG6_CHLSB	INTS12		4306.59	3140.23	3791.75	3936.73	4338.49	3574.71	4309.94	3512.18	3754.96	3649.54	5476.44	3663.66	3828.47	4613.88	3752.63	3887.35	4430.9	4213.75	5151.79	4002.1	4586.4	4809	4686.36	4480.61	4611.27	3754.98	2903.33	5335.3	3888.1	3658.65	3506.35	3102.06	3362.16	4068.62	4222.08	4724.37	4136.65	4175.57	4961.34	3780.96	6231.02	3784.29	4062.79	4450.27	4829.55
A0A0D9QVG7	A0A0D9QVG7	A0A0D9QVG7_CHLSB	TEX2		6597.79	10587	10805.3	11154.1	12530.8	12223.6	9395.29	13083.2	5590.92	7888.35	11233.5	16455.1	9097.16	12359.4	8224.62	11957.1	12243.2	9194.43	13270.3	15563.5	8108.83	8667.67	11944.1	12079.9	9012.46	15444.5	5598.38	10377.2	14915.1	6604.28		14938.6	7512.65	10167.7	10971	3214.56	9678.35	10638.1	8424.95	11151.8		4108.46	6944.81	10860.3	8928.32
A0A0D9QVH0	A0A0D9QVH0	A0A0D9QVH0_CHLSB			23553.2	18385	20272.9	16035.2	23022.7	19469.4	18221.6	20966.3	21663.5	18040.2	20905.5	18776.9	20638.3	20659	18172.8	19336.5	19780.3	19307.6	17309.7	17294.8	18841.1	18976.1	19608.4	19907.4	18945	19330.5	17620.7	19903.3	18889.6	21373.6	21772.6	17900.4	19051.2	18864.7	17716.8	20610.6	19655.3	18216.1	20584	17274.6	22637.3	17595.2	16035	19017.2	21069
A0A0D9QVH5	A0A0D9QVH5	A0A0D9QVH5_CHLSB	LIPT2			4521.96		5951.95	9818.17					8647.87	10812.4				8987.53							7962.7	11967.9		9273.52		2254.33	5959.78	6932.81	5641.64		5640.55					4271.39	5528.08	5786.03		3296.07		6670.36	8143.4	4414.27
A0A0D9QVH6	A0A0D9QVH6	A0A0D9QVH6_CHLSB	PPA2		38237.6	28949.2	34916.7	33748.2	36288.1	37297	33980.2	33404	38166.6	38411.2	32896	34367.5	35059.3	35663.3	34524.6	32217.5	32607.3	34327.7	28790	28921.9	38215.3	36343.6	30758.8	33462.5	34389.9	31532.8	34124.1	32959.9	34342.3	38445	32758.4	27713.5	35557.9	35312.6	35254.7	36049.7	36021.3	31820.6	31206.2	32860.8	16737.8	25455.3	25236.6	34268.6	37177.5
A0A0D9QVH7	A0A0D9QVH7	A0A0D9QVH7_CHLSB	LCAT				4246.74																																						14459.9	7623.42
A0A0D9QVI4	A0A0D9QVI4	A0A0D9QVI4_CHLSB	POLG2		5234.76	3418.47	6092.88	4423.6	6376.79	5722.72	5569.61	4591.83	4940.58	4764.98	6823.49	5818.12	6234.52	7667.64	5584.29	4566.85	5114.21	5266.28	4750.66	4471.06	4946.81	7251.43	6157.36	6503.01	5326.96	4243.19	4021.27	6826.5	6504.25	6531.09	6569.14	4663.17	4875.79	6660.31	4093.25	3295.43	6590.47	4302.5	4549.35	6769.21		5007.66	2421.61	6387.75	6737.45
A0A0D9QVI6	A0A0D9QVI6	A0A0D9QVI6_CHLSB	DDX5		268646	189416	240477	255174	240388	265375	236707	185872	265200	244723	241338	202957	199406	204447	233760	286437	219804	264424	267179	231921	305223	244713	221754	251520	236966	269544	303397	228382	256883	255176	270907	199263	272777	281310	264534	298018	232119	208450	260276	243670	212820	248722	307247	263504	311310
A0A0D9QVI6;A0A0D9R2U6	A0A0D9QVI6;A0A0D9R2U6	A0A0D9QVI6_CHLSB;A0A0D9R2U6_CHLSB	DDX17;DDX5		103706	30431.7	83639.3	77664.3	70168	83725.9	114092	21677.4	147384	176761	68738.5	42286.7	72337.5	48514	93241.6	119303	53388.7	112181	104557	38445.2	133286	104009	73938.8	100640	139156	97984.8	236357	93377.8	84051.9	117206	146543	47260.8	172885	136931	56723.9	274789	110322	46801.7	204635	125816	192885	191744	159409	69939	149188
A0A0D9QVI6;A0A0D9RNA2;A0A0D9R2U6;A0A0D9S0E1	A0A0D9QVI6;A0A0D9RNA2;A0A0D9R2U6;A0A0D9S0E1	A0A0D9QVI6_CHLSB;A0A0D9R2U6_CHLSB;A0A0D9RNA2_CHLSB;A0A0D9S0E1_CHLSB	DDX17;DDX3X;DDX3Y;DDX5		7396.24			4609.45	5828.42	6794.76	7665.86		17934.8	13277.1			6478.72		7024.31	7855.32		10197.3			10060.9	5594.22		7388.28	9841.94	7335.27	23970.5	8090.17		6949.57			14656	7976.42	4701.3	19655.8	7478.66	6436.68	23735	6813.22	23607.4	19387.5	14374.2	6955.72	13360.8
A0A0D9QVI7	A0A0D9QVI7	A0A0D9QVI7_CHLSB	SLC12A4		7984.11	8826.96	7962.9	10032.6	8608.16	8921.4	8666.94	10256	6106.43	8827.75	5832.83	8138.25	8223.41	8252.39	9587.23	7518.61	9701.59	10339.8	8330.78	8525.34	7079.36	8443.51	7343.72	7467.43	8201.59	6842.85	6199.8	6512.26	7226.54	8982.39	9854.06	10466.1	11043.8	9683.05	6867.3	3847.26	9603.58	10762.1	5477.76	8910.9	5476.02	7789.14	5960.4	7714.68	7816.97
A0A0D9QVI7;A0A0D9R431	A0A0D9QVI7;A0A0D9R431	A0A0D9QVI7_CHLSB;A0A0D9R431_CHLSB	SLC12A4;SLC12A6		4890.84	8884.67	5605.67	6504.2	4587.91	6089.11	7039.3	6627.93	4196.54	6173.97	6880.49	8905.21	7335.35	8996.92	7643.51	7038.55	11333.6	5866.53	8628.6	9957.51	5555.78	6204.77	5484.01	5861.69	7931.18	7021.69	3699.62	5578.1	8122.09	4185.7	5351.96	14826.3	7670.8	9461.23	6493.19	2900.94	10387.8	13629.6	3677.03	9282.8	2691.21	2867.38	2814.42	6372.37	4193.29
A0A0D9QVJ0	A0A0D9QVJ0	A0A0D9QVJ0_CHLSB	ACTN4		149951	136052	156321	142318	148530	155466	133646	123680	130781	137799	162917	145236	131515	124774	127418	124304	125450	140276	154123	132602	146354	121459	136278	133683	146595	173626	163778	148703	147885	139959	151082	123531	140005	160767	142506	143911	144577	120187	124464	142791	118212	132774	102425	122482	119106
A0A0D9QVJ0;A0A0D9RKZ5	A0A0D9QVJ0;A0A0D9RKZ5	A0A0D9QVJ0_CHLSB;A0A0D9RKZ5_CHLSB	ACTN1;ACTN4		300084	182160	273060	248872	232296	275276	225266	154023	227205	249646	264635	221134	218647	196449	229418	246510	224423	261534	292512	175463	245780	229217	226272	248138	275352	349246	313627	280135	261723	269483	276263	209646	235382	324766	230050	253479	278996	192729	229055	283593	232452	269332	147751	236150	216152
A0A0D9QVJ1	A0A0D9QVJ1	A0A0D9QVJ1_CHLSB			4854.95	2979.84	5468.54	4326.92	5905.21	5248.31	4034.22		3550.4		4022.79	3548.84				4843.02	5110.95	4089.9		4204.44	4333.31	4683.58		4682.05	3762.64	2408.75	2312.21	4624.23		4703.35	6439.95		4926.15	5175.23	5584.82	3426.5	5748.7	4664.35	3127.09	5409.04			3341.59	4452.29	3891.27
A0A0D9QVJ2	A0A0D9QVJ2	A0A0D9QVJ2_CHLSB	OSBPL8		29529.3	37130.2	28872.6	23586.2	31162.8	31326.1	46301.9	25378.1	25090.4	27339.4	22993.9	21909.6	36401.7	42820.5	51482.2	27438.3	58309.5	57684.4	28749.5	25629.5	25708.4	28287.1	26679.2	26672.1	36509.1	22229.1	30364.1	17946.7	24140.8	27176.8	26171.3	36545.6	66799.6	25499.3	24400.3	26321.6	40254.4	44936.4	30614.3	27293	15587.4	24122.1	20511.5	24984.1	40878.8
A0A0D9QVJ3	A0A0D9QVJ3	A0A0D9QVJ3_CHLSB	PPME1		16387.8	12631.7	11444	12390.3	11307	11972.9	17428.8	12189.1	17810.3	17501.7	9243.17	10899	13896.5	9455.51	14193.1	13493.2	11654.6	15511	13322.1	18316.2	15954.8	16662.6	13012.9	13064.3	18342.3	13394.8	15566.5	13127.9	10154.2	12209	13391.4	9913.87	14938.2	13057.1	10533.9	13050.1	13658.9	7031.54	13104.1	12259.5	12812.9	18036.5	22248.1	8883.65	14952.8
A0A0D9QVJ4	A0A0D9QVJ4	A0A0D9QVJ4_CHLSB	EIF3K		31873	23938.3	30622.8	28427.1	29558.3	29356	32181.3	25525.9	34017.4	35012	30774.3	27172.7	29118.5	26622.4	30199.9	28537.6	26790	26419.2	31706.3	29029.8	32290	30439	28675.1	30059	32874.2	36073.1	36338.3	31563.8	26064.4	38222.8	35332.9	30590.4	32960.3	35465.8	27723.3	37989.6	31650.3	28285.5	33141.3	36674.2	50226.1	41102.8	30443.4	30974	33833.2
A0A0D9QVJ7	A0A0D9QVJ7	A0A0D9QVJ7_CHLSB	CEP95		4522.64	6859.75	6045.83	5354.81	4439.41	3785.59	4176.34		5809	5024.45	3979.59			4691.31		5812.91	5215.49	6179.82	4136.29		6268.33	4267.41	4574.84	3963.47	4381.78	3276.53	5590.14	4223.59	5312.32	4835.57	7084.15	5665.17	6911.38	4345.36	3532.57	7337.5	4668	4791.43	5159.58	4295.86			5663.96	3680.9	4670.49
A0A0D9QVJ9	A0A0D9QVJ9	A0A0D9QVJ9_CHLSB	NAP1L1		169605	100093	117118	138677	112154	138741	181568	118955	196818	191768	149573	130122	168198	122154	150311	150524	125326	147444	151813	119593	164683	163512	131207	136838	199154	137487	211665	174235	142722	176937	170347	97935.3	161110	145932	112854	147725	149426	118966	172579	174298	194957	191811	235628	135383	175158
A0A0D9QVJ9;A0A0D9RB24	A0A0D9QVJ9;A0A0D9RB24	A0A0D9QVJ9_CHLSB;A0A0D9RB24_CHLSB	NAP1L1;NAP1L4		155550	183185	186036	153965	136230	144322	113480	148989	113363	101077	153648	154961	107948	135637	152776	193949	172224	160668	215552	213215	127502	127883	133000	128983	158058	245293	127429	151834	129496	123894	143838	210757	131846	153071	138977	97070.4	112493	106972	189282	134701	57901.7	150486	307533	155642	194960
A0A0D9QVK3	A0A0D9QVK3	A0A0D9QVK3_CHLSB	KRR1		11240.3	6131.91	8578.73	8925.13	10531.3	8926.18	12539.3	9178.65	13006.5	10817.4	12594.7	12225.6	14736.9	12732	13677.4	10319	11490.1	12956.2	9200.64	8198.75	9093.06	10466.4	6586.56	9539.92	12114.6	10407.6	14144.8	9916.21	7829.27	10514.5	11395.8	8153.01	13994.7	12688.2	7954.35	14298.1	15732	10344.7	15578.9	10641.3	17232.2	12118.2	13281.2	8487.63	12206.4
A0A0D9QVK4	A0A0D9QVK4	A0A0D9QVK4_CHLSB	BDH2		59754.9	43209.2	67473.6	66884.5	64716.7	69758.6	68513	56959.3	84453.9	90041.7	88289.5	63566	62508.2	89325.4	75731.5	60810.1	59190.3	65114.1	53415.3	43725.9	79496	64710.2	83832.5	78768.1	64053.7	66040.6	88609	70795.9	76097.9	85376.8	63084.2	50952.5	70806.6	58247.5	63575.3	72564.5	66538.4	51210.1	77795.8	68402.4	56417.6	65314.2	62217.5	67965.4	74630.1
A0A0D9QVK8	A0A0D9QVK8	A0A0D9QVK8_CHLSB	DUS2		7860.55	3470.07	4569.1	4172.4	4732.82	5929.21	6402.65	3622.44	4968.23	5722.78	5846.22	3235.94	5368.59	3441.04	4227.68	3664.82	2094.81	7179.53	3748.43	2853.45	5622.79	5297.03	2797.78	3985.49	6561.58	5081.95	4105.4	3636.5	3552.11	4687.39	4609.45	2516.65	5374.37	4873.35	6308.75	6574.68	5278.05	3396.96	6265.71	3542.8	5672.95	4530.57	5330.71	5318.79	5400.81
A0A0D9QVL0	A0A0D9QVL0	A0A0D9QVL0_CHLSB	GNA13		10986.7	10648.9	9153.29	9859.44	10544.5	11725.2	13282.5	12543.6	13547.2	13778.8	13024.5	15464.8	15223.4	16843.2	15201.2	10659.4	13140.2	16882.3	12653.1	11575.7	11115.4	10008.7	11820.7	11486	14522.6	11802.3	15531.1	13285.5	12987	12224.6	11854.8	15126.9	15505.5	11930.7	12033.4	11665.5	17687.3	18127	12472	13731.7	14880.6	17042.7	12010.2	12542.5	16592.6
A0A0D9QVL4	A0A0D9QVL4	A0A0D9QVL4_CHLSB	CISD2		19598.9	23800.8	30084.6	18510.1	25710	24908.2	33446	16375.4	20515.8	24565.3	23043.8	22556.2	30783.8	46611.6	42868.9	22149	46339	45818	25095.9	29494.5	20978.8	22245.3	21550.4	19093.2	28736.8	23432.7	24157.7	20181.9	25896.4	23173.2	23021.3	36717	46337.3	16186.7	25892.3	24518	29335.7	41479.7	25910.4	21119.1	18237.7	17234	23086.9	22697.3	31620.8
A0A0D9QVL6	A0A0D9QVL6	A0A0D9QVL6_CHLSB	MANBA		1945.53	1701.85	2639.32	2135.46	2375.44	1974.15	1433.45	1680.58		1346.74	2209.49	1647.73	1873.17	1978.94	1875.29	2066.55	1928.18	2247.79	1518.08	2157.39	1718.73	2436.12	2492.04	1923.5	1865.61	2608.03	1664.42	1518.87	1676.15	1316.09	2033.83	1986.23	1546.57	2147.18	2595.72	2194.41	1642.47	1615.79	1365.92	1730.55		2713.97	1288.52	2126.69	1762.72
A0A0D9QVL8	A0A0D9QVL8	A0A0D9QVL8_CHLSB	NFKB1		19020.6	13423	16455.5	14288.2	15007.9	15091.2	15986.1	11510.4	15795.8	15056.1	14486.2	13655.7	13999	11241.3	15312.7	17514.9	14485.3	16690.3	16631.9	12786.2	16607.8	14737.9	13936.9	15252.1	15758.3	16021.1	16439.6	15090	13587.3	14072.5	17738	12092.1	16064.1	14833.5	11221	12989.5	14830.7	11788.8	13120.4	16037.9	13815.3	13563.5	17724.7	15157.4	15009.1
A0A0D9QVM1	A0A0D9QVM1	A0A0D9QVM1_CHLSB	SLC39A8		3192.33	5107.09	6452.56	4810.98	4301.77	4590.62	5962.61		2681.15		6356.92	3897.51	3519.27	3511.04		3423.9	6650.67	3847.12		4278.7	3923.17	4206.09	4203.67	3675.68	4123.14		2559.95	3828.13	5227.35		5630.79	8717.92	3451.46	6581.41		2497.4	5705.1	7711.12	2403.98	4171.35					2699.5
A0A0D9QVM5	A0A0D9QVM5	A0A0D9QVM5_CHLSB	PAAF1		56305.3	38622.9	51142	64632.8	51636.3	54464.6	34563.5	31025.8	42816.4	50093.2	42981.6	47423.8	65438.3	41603	56509.3	66495.4	57154.4	74365.5	55405.9	42912.3	52848	46415.5	31565.6	46403.7	54829.9	65897.8	59954.1	58338.5	60007.9	60504.3	69010.3	51936.4	67890.3	52924.4	55216.4	57558.6	52552.3	40471.3	57566.6	58505.3	135741	66053.1	51023.1	56790.3	66065.2
A0A0D9QVM6	A0A0D9QVM6	A0A0D9QVM6_CHLSB	COA4		3978.14	4048.7	3572.51	3876.16	3568.59	3767.18	2105.84	3567.03	2440.79	2077.94	3186.27	3169.18	2484.74	3035.41	3249.59	4211.05	4130.28	3323.38	3861.87	3938.74	3118.85	2981.2	2656.57	3027.53	2203.21	2653.65	1746.52	3600.84	2911.08	2855.9	2006.92	3876.85	3737.92	4179.62	3651.62	2816.46	2941.09	2810.06	2139.08	2656.29	1437.16	2434.53	3704.31	2917.47	3675.75
A0A0D9QVM7	A0A0D9QVM7	A0A0D9QVM7_CHLSB	FAM98C		4341.67	7070.87	8427.07	3664.15	5300.25	5750.93	5601.4	9171.98	1935.05	2889.97	8553.53	8220.85		6978.98	6104.68	4673.36	6127.82		5174.56	5904.25		6125.76	6782.31	6467.98		5091.09		6657.32	7831.54	6653.78	7622.57	5187.81		5969.86		2948.28	7480.64	9533.88	2355.53	5742.52	5380.17	4194.39		9412.96	4543.49
A0A0D9QVM8	A0A0D9QVM8	A0A0D9QVM8_CHLSB			1707.12	1825.54	1478.33	2326.73		2499.57	1733.31		1427.34	1629.94	2362.4	2082.06	1608.79	2416.52		2098.75		1693.53	2245.23	2327.33	2274.17	2507.57	2430.09	3128.58	1565.83	2660.16	1680.01	1941.34	2978.75	1843.09	2129.91	1710.88	2298.66	1605.32	2561.83	1522.31	1724.47	1980.51	1648.29				2235.03	2145.22	1839.44
A0A0D9QVM9	A0A0D9QVM9	A0A0D9QVM9_CHLSB	MRPL48		14421.3	17465.7	15343.1	16826.5	17743.4	18737.9	15042.6	16640	13829.1	13649	15832.2	14712.9	15512.3	15535.7	16592.1	15978.1	16058.9	16702.4	17687.8	19793.3	16394.3	15739.6	14379.6	15819.1	14229.8	12028.1	12460.4	15020.4	18145.7	15762.5	18716.7	15994.8	14077.3	17465	18893.8	12115.2	15725.2	18120.9	14563.3	13950.1	7387.97	10010.5	11475.5	17856.7	14312.5
A0A0D9QVN1	A0A0D9QVN1	A0A0D9QVN1_CHLSB	RAB6A		7810.2	9057.02	12612	10192.3	8404.05	10331.4	13095.8	8707.1	11628.5	13260.8	10829.7	9099.37	9819.43	14459.3	12731.9	11925.1	11592.4	16433.9	11041.1	8051.53	11941.7	13468.4	10533	12069	12491	8439.95	12296.2	13186.5	13186.3	13960.5	11203.3	7467.88	15981.8	10582.4	9294.36	14568.6	13206.6	9349.5	12509.3	15310.6	21562.3	19561.7	12943.7	11743	13530.1
A0A0D9QVN1;A0A0D9RE92	A0A0D9QVN1;A0A0D9RE92	A0A0D9QVN1_CHLSB;A0A0D9RE92_CHLSB	RAB6A;RAB6B		12827.5	19939.9	14662.2	14715.6	14775	15152.7	14842.8	15015.3	11248.6	11407.4	9701.17	11431.1	18567.2	21891.5	16834	15016.1	27502.7	21873	15242.7	20508.3	12412.6	16400.3	14632.8	14466.2	15612.6	12820.6	12229.7	13493.4	12935.2	14253.3	16516.1	22628.4	20691.5	12861.8	16096.4	10453.6	16396.9	22155.3	11038.5	15412.9	12212.5	12229.4	12500.2	19518.6	16342.8
A0A0D9QVP1	A0A0D9QVP1	A0A0D9QVP1_CHLSB	PSMD8		35411.7	36801.6	38515.2	36392.4	32128.6	39910.3	40282.2	38582.8	36258.2	36366.8	37426	41255.9	35360.8	33407.2	35345.6	41045.8	30293.5	36649.7	44905.6	42399.1	39009.2	41058.3	38513.6	40101.5	37223.3	42010.3	37726.5	38713.5	35861.6	33810.3	36787.5	41957.1	40884.5	42758.7	43454.6	36701.1	38072.8	37828.6	34442.4	40074	46620.8	44261.1	34292.5	40236.7	36501.5
A0A0D9QVP3	A0A0D9QVP3	A0A0D9QVP3_CHLSB	ARHGEF17		2447.83	2537.02	2383.61	2169.13	2947.33	2771.7	2527.33	2937.51	2438.43	4113.92	1562.11	2655.64	2234.95	2790.42	3436.23	2762.51	2109.71	3139.95	2311.63	2992	2307.15	3451.35	3726.65	3351.02	2508.81	2727.02	1603.13	2790.18	2750.27	3303.95		1784.22	2255.04	3405.06	2247.6	1990.71	3057.23	2503.04	2569.27	3911.53	3668.28	2631.21	2602.81	2482.23	3210.84
A0A0D9QVP5	A0A0D9QVP5	A0A0D9QVP5_CHLSB	SLC7A6OS		2752.21	2421.03	3226.64	3513.7	2669.73	2905.68	2702.22	3445.55	3573.24	3548.64	3145.75		3829.16	1994.05		2803.69		3303.84	2849.79		3400.7	3513.42	3398.26	3102.49	3586.31		4022.15	2810.53		3353.62	3271.41	3282.37	3473.04		2493.47	4054.04	2642.9		4044.58	3398.07			5482.24	4103.06	2951.01
A0A0D9QVP6	A0A0D9QVP6	A0A0D9QVP6_CHLSB	TBC1D15		18089	10217.3	14046.5	12270.8	12352.2	14501.4	15928.7	10080.6	15166.3	16717	11849.6	11877	13677.9	11921.4	14877.6	13328.3	11948.6	14398.2	15379.8	13568.2	15249.4	14153.4	13878.3	14931.9	15313.4	15480.4	16619.2	14664.6	13781.7	13084.5	14384	12853.4	14434.1	13960.9	14691.1	16804.8	14439.9	13300.3	16143.1	13889.7	15801.8	16366.2	14787.6	12577.7	13886.4
A0A0D9QVP7	A0A0D9QVP7	A0A0D9QVP7_CHLSB	PPP3CA		5320.87	6531.41	5915.77	4753.57	5283.37	4728.16	3822.69	4395.82	4163.21	4694.64	6119.92	7681.76	4264.52	5317.84	3772.6	4557.59	5036.29	4627.28	4826.16	6116.4	4641.43	4160.91	6145.42	5221.19	3888.69	4755.2	2956.1	5026.78	5498.24	5015.63	4933.48	6067.55	4338.92	5346.21	5598.27	3608.03	3883.81	4660.3	3547.52	3541.79	8152.37	4558.1	3851.67	6457.13	4031.82
A0A0D9QVP7;A0A0D9R8V5	A0A0D9QVP7;A0A0D9R8V5	A0A0D9QVP7_CHLSB;A0A0D9R8V5_CHLSB	PPP3CA;PPP3CB		8233.15		7087.9	6994.62	8415.67	7701.58	7502.69	6205.67	8413.29	5728.35	7526.2	5434.98	7198.09	6681.5	6495.69	8137.79	6340.51	8017.79	7264.32	5353.16	7995.19	8116.71	6227	8171.76	8468.08	8966.8	8958.95	8841.39	7069.3	7135.83	8004.58	5388.02	7606.32	7054.71	3778.55	5689.23	8597.91	5959.26	4350.41	7511.67	6017.62	9583.58	10073.9	6851.76	7660.87
A0A0D9QVP7;A0A0D9R8V5;A0A0D9RV32	A0A0D9QVP7;A0A0D9R8V5;A0A0D9RV32	A0A0D9QVP7_CHLSB;A0A0D9R8V5_CHLSB;A0A0D9RV32_CHLSB	PPP3CA;PPP3CB;PPP3CC		4720.5			4067.24	4770.86	6850.41	10778.3	3390.61	8270.33	12328.1		3542.21	7346.48		7017.14		3095.22	5441.88	3997.58	3195.34	9940.74	5746.75	4698.48	5229.79	10242.4	5903.24	16331.6	5015.79	3679.46	5162.98	5359.74		7601.13	7618.92		11731.9	6541.51	3870.61	13283.3	7371.37	10775.5	13105.4	6074.74		5304.8
A0A0D9QVP9	A0A0D9QVP9	A0A0D9QVP9_CHLSB	FCHSD2		6004.19	5529.99	5836.76	6488.35	6386.28	6030.94	4544.19	4258.5	6594.7	5730.19	3732.01	6418.33	4359.93	5465.86	5091.03	4304.94	4397.45	4679.43	5163.85	4048.16	5453.5	6549.56	6164.18	6014.07	4678.7	5288.93	6361.96	3544.89	7498.23	6233.35	5700.43	5414.37	4525.41	5765.56	5972.83	4514.77	6334.25	5664.87	4562.89	5243.63		17594.1	4904.03	6432.4	6819.58
A0A0D9QVQ0	A0A0D9QVQ0	A0A0D9QVQ0_CHLSB	PRMT7		4499.67	6047.5	4946.41	4652.65	5061.41	4980.41	4040.53	4143.3	4856.93	5317.19	4871.24	7168.53	4346.7	4757.61	3870.67	4511.12	5412.02	4111.66	5346.5	5746.63	4831.56	6679.6	5454.25	4752.74	4080.36	5389.29	4882.44	4438.15	4507.15	4605.54	5880.33	6660.82	5258.75	6274.28	5620.35	4118.44	4942.67	5868.62	4565.13	4485.01	8661.71	5179.07	4440.02	5347.66	4181.5
A0A0D9QVQ1	A0A0D9QVQ1	A0A0D9QVQ1_CHLSB	RAB21		21211.3	17862.3	19718.8	17767.8	20898.3	22384.7	34343.9	14497.9	23739.1	24775	13140.1	13745.4	22109.2	25484.8	32951.4	22025.1	25782.2	30710.2	19789.3	18850.4	20697.4	21082.5	16959.4	20069.9	28164.8	17437.3	23074.8	17824	19945.9	23459.1	20851.1	21427.1	36225.9	20450.7	21895.9	19766.2	27714.1	21944.1	23686	24227.3	17175.3	23384	16659.7	17947.9	27965.5
A0A0D9QVR4	A0A0D9QVR4	A0A0D9QVR4_CHLSB	TRMT10A		4189.66	10314.2	7415.35	6022.92	4666.69	3385.82	2641.84	5903.67	1982.86	2898.84	7953.52	7086.87	4240.76	6127.42	3790.16	4019.52	4001.41	4118.46	4720.08	10985.2	3697.6	3022.14	5340.68	3465.89	3163.91	3483.94	2740.42	5014.97	3482.74	3688.03	2774.17	4953.89	2429.25	4432.24	5978.45	2637.83	3784.29	5792.83	3075.01	3965.34	2757.06	3266.48	2151.13	5024.11	4611.27
A0A0D9QVR5	A0A0D9QVR5	A0A0D9QVR5_CHLSB	TANGO6		5113.24	6574.48	5101.31	5992.38	4912.25	5554.53	6049.97	6758.62	4694.19	5390.57	4873.65	5498.32	5581.64	5459.61	4552.95	4925.87	6307.69	5484.37	5678.46	6692.78	5230.17	5339.33	5412.97	4990.13	5911.61	4357.07	4300.72	3503.18	5492.78	4203.34	4551.63	6226.02	5509.88	5655.33	5438.72	4442.62	4727.58	3868.84	4472.75	4439.6	1806.23	4826.72	3965.1	4763.99	4200.78
A0A0D9QVR6	A0A0D9QVR6	A0A0D9QVR6_CHLSB	CEP112			817.753	609.301	1323.68	1001.83	670.201	603.317		1174.73	834.925		1001.44	741.503	825.286		1123.34	1048.12			761.749	439.6	849.465	715.359	720.519	1081.63	887.01		506.417	674.483	685.761		969.27	958.224	459.734	773.884	657.291	482.67	608.361	467.445	665.985		780.582		858.826	733.993
A0A0D9QVR7	A0A0D9QVR7	A0A0D9QVR7_CHLSB	ZFC3H1		3249.61	4119.36	3265.13	3420.45	4435.11	4264.03	3793.66	3875.5	3108.42	3245.8	2171.34	4518.99	4444.96	4314.74	4083.32	3180.96	4375.36	4053.21	3720.12	3811.48	3333.94	3121.47	4115.33	3223.03	3519.71	4581.22	3570.85	3871.95	3759.76	3780.81		4121.98	3960.98	3608.51	3120.55	1873.51	3752.76	4527.02	4175.9	4012.36	5263.38	4674.82	1899.73	4192.03	4717.28
A0A0D9QVR9	A0A0D9QVR9	A0A0D9QVR9_CHLSB	APOH		14656.2	6743.48	13812.2	9124.55	7564.92	8748.7	8516.62	2926.94	8188.87	7285.27	6174.87	4719.31	7202.91	8107.52	9668.46	15970.4	14217.2	18972.9	9699.47	7242.69	9451.53	6484.86	7574.43	5959.75	4906.31	7997.98	7441.59	8813.6	8516.89	12117.8	16134.2	10658.8	16227.1	7333.76	7094.72	8319.16	5464.26	2824.15	6591.75	7548	75694.8	25900.9	10084.7	5991.69	9461.86
A0A0D9QVS4	A0A0D9QVS4	A0A0D9QVS4_CHLSB	CHTF8		2187.28	3746.86	4855.71	4315.43	5051.09	3750.3	5359.96	5768.9	3735.4	2860.13		5801.74	5542.19	5330.56	4516	5691.68	6012.59	4298.67	5468.96	6862	3690.24	5057.07	4671.55	4642.99	4151.93	5584.87	4185.91		5347.27	4118.34	5335.9	5601.11	3392.27	5634.85	7205.26	3559.5	5299.01	4138.46	9635.83	3694.34	7064.04	4900.64	4984.65	4125.48	3926.74
A0A0D9QVS7	A0A0D9QVS7	A0A0D9QVS7_CHLSB	PRKCA		12115.3	13369.4	15277.5	14219.9	10820	14172.7	13626.3	12477	11677.9	13150.3	13399.3	12965.2	14624.9	13435.5	15158.9	15809.4	14371.4	13617.1	15530.5	13715.6	13887.8	12055.7	11724.8	13202.5	12645.6	13558.5	9888.24	12173.8	12009	10770.9	13079.9	13896.3	14157.2	16116.8	14225	9074.79	13067.6	12074	8351.45	13975.7	9604.14	11709.9	17973.3	12284.2	13764.9
A0A0D9QVS7;A0A0D9S5H3	A0A0D9QVS7;A0A0D9S5H3	A0A0D9QVS7_CHLSB;A0A0D9S5H3_CHLSB	PRKCA;PRKCG		12068	4154.6	8648.11	8948.95	7478.11	8943.65	8430.5		9519.08	9201.56		5764.82	7848.04		7415.39	8082.32	8557.91	14768.9	8769.09	7893.34	9047.39	7382.04	7921.4	9653.11	7858.4	7491.92	11166.6	8198.02	6801.56	9286.58	11598.3	8060.88	13150.1	10572.8	6911.39	8914.51	8463.44	5469.61	9014.98	6997.96	7937.77	9057.42	13102.1	7073.28	10059.7
A0A0D9QVT2	A0A0D9QVT2	A0A0D9QVT2_CHLSB	SPINT2		1981.22	2366.38	2609.48	2074.62	2807.04	3444.09	1926.12	2164.52	533.598	481.088		570.885	485.197	1079.08	491.872	2395.66	3165.08	2687.76	2331.54	2661.04	3180.59	2636.1	2484.73	2319.11	2477.26	1598.26	956.234	1129.45	788.04	1479.33	1628.56	2710.34	3642.56	1797.03	2772.91	2189.84	3604.73	3147.97	1994.25	1892.49	2823.34	2018.64	1403.45	1542.25	1977.02
A0A0D9QVT3	A0A0D9QVT3	A0A0D9QVT3_CHLSB	UTP4		21802.3	19595.4	24211.1	23827.6	24319.8	22448.4	21194.2	19340	20844.9	19981.3	22564.4	19136.4	19072.2	22268.4	23283.1	17956.1	19516.6	20382.3	22046.2	23344.3	23726.3	22275.1	21827.3	20698.9	21799.3	21051.6	21119.5	21379.4	22153.7	23558.5	21962.9	20521.3	21759.8	21343.6	23137.1	22001.1	21355.5	21833.3	18676.8	21847.1	18625.9	24045.7	19112.1	20598.8	21523.1
A0A0D9QVT4	A0A0D9QVT4	A0A0D9QVT4_CHLSB	PPP1R14A		3523.31	4992.71	4121.39	6270.85	3703.39	4277.42	3458.44	6175.85	3423.7	3397.67	4624.26	4198.86	3758.85	5413.02	3154.02	5063.75	4060.65	3626.09	4364.76	5963.89	3077.68	3347.92	4908.32	4863.57	4800.41	5632.3	3298.64	5299.77	3198.48	3992.48	4202.68	4485.57	3005.49	4198.21	5481.79	5724.19	4465.24	4316.98	2562.08	4458.36		2530.51		3564.93	2824.18
A0A0D9QVT7	A0A0D9QVT7	A0A0D9QVT7_CHLSB	ADH5		59529	45429.8	58565.9	57318.2	62001.6	54437.3	58850.7	41005.9	65882.4	63254.7	63112.3	64799.6	69085.5	58130.4	65674.3	54935.8	43928.6	54221.9	50932	41133.2	62071.6	66684.1	63696.7	67242.7	61989.2	65977.3	66670.1	69483.1	63290.9	73620.5	61493.2	37260.5	58082.3	64840	46858.2	54181.7	61379.1	46463.5	66018.9	66356.5	36052.7	48626.3	59745.6	58964.7	68432
A0A0D9QVT8	A0A0D9QVT8	A0A0D9QVT8_CHLSB	METAP1		20520.8	15128.5	18816.9	19153	19359.8	21205.1	21709.9	17106.2	24057.8	23683.5	21546.1	20803.1	21994.7	20102.4	22620.6	20770.2	16637.8	20009.1	20365.4	15570.5	22626.3	21953.8	22344.7	23245	23483.6	25836.9	25812.9	22980.3	22436.3	22984.4	20744.2	18082.8	21895.2	22894.5	17176.2	23205.6	21090.4	19955.2	23474.4	23357.8	19278.2	20510.9	25635.9	22432.6	25620.3
A0A0D9QVT9	A0A0D9QVT9	A0A0D9QVT9_CHLSB	SNTB2		1448.26	1385.62	1071.43		1634.75	1246.31	1079.51	1976.59	840.22	1209.27	1055.59	1350.89	1141.73	1061.17	1319.76	913.819	2343.6	1381.48	1117.48	1794.93	808.252	1649.06	1515.59	987.651	1341.64	805.742		1609.33	957.426	1473.9	489.814	1105.32	1440.54	721.494	831.658	959.828	1201.26	1158.71	637.159	715.063	966.785	966.42	1532.46	1366.06	751.711
A0A0D9QVU0	A0A0D9QVU0	A0A0D9QVU0_CHLSB	VPS4A		13503.9	13584.5	13269.5	13759.6	12456.2	12928.4	11259.1	13793	11487.2	11873.3	15502.4	15529.3	11858.8	13240.7	12144.7	12836.1	11588.6	13017.1	12731.7	12895.6	13305.7	12360.2	12988.1	12852.4	11608.6	14607.7	12910.1	14149.2	12890.4	13899.3	12375.5	12529.5	10952.8	12930.1	12313.5	11647.9	12593.2	13627.2	9875.41	12295.8	14590.2	13194.1	14504	14465.5	12882.1
A0A0D9QVU0;A0A0D9S021	A0A0D9QVU0;A0A0D9S021	A0A0D9QVU0_CHLSB;A0A0D9S021_CHLSB	VPS4A;VPS4B		17654.3	26498.5	22627.9	31966.1	28859	27026.4	19137.7	36379.6	20897.6	22919.4	30667	24115.4	23557.3	26136.4	22709.3	20002.5	23115	19342.7	21306.4	26313.2	20418.6	22310.2	30710.1	21738.2	18343.3	17558.2	13281.9	23885.5	21105	23845.8	20337.3	27808.7	21334.5	23440.5	25551.7	16240.4	23549.8	32329.6	22610	15129.5	10793.8	17296.9	17042.9	27702.1	18463.2
A0A0D9QVU0;A0A0D9S021;A0A0D9SE05	A0A0D9QVU0;A0A0D9S021;A0A0D9SE05	A0A0D9QVU0_CHLSB;A0A0D9S021_CHLSB;A0A0D9SE05_CHLSB	FIGNL1;VPS4A;VPS4B		27970.4		20336.2		5419.53		14629.5		43359.5	29512.7			8997.71		10966.5	7278.63		13023	8657.5		14004.5	7914.09		9010.3	20949.4	11054.2	50605.8	9176.88	6827.24	16584.5	7713.68		29189			74956.5	9763.13		56128.8	10077.6	67309.9	60573.1	40491		32632.4
A0A0D9QVU1	A0A0D9QVU1	A0A0D9QVU1_CHLSB	EIF4E		26514.3	27169.3	27093.6	38920.6	24003.2	23053.5	34735.7	17761.1	46963.8	45190.8	25563.1	20422.9	25681.2	29480.5	30580.1	42555	27296.7	40945.8	29999.8	15350.6	49360.9	44406	28851.4	39955.8	33452.7	38951	40801.4	40209.9	27206.5	46905.8	40163.7	20456.6	37463	47547	20605.6	39745.6	39344.1	21015.6	37363.4	46815.2	49490.4	55289.8	34490.5	21796.4	39452.9
A0A0D9QVU1;A0A0D9RA12	A0A0D9QVU1;A0A0D9RA12	A0A0D9QVU1_CHLSB;A0A0D9RA12_CHLSB	EIF4E;EIF4E1B		2854.02			822.406	354.326	1082.67	3394.91		1226.32	1841.66	1610.85	1496.92	1025.93			1456.88		916.95	3957.5	1479.44	3699.91	2984.27		898.804	28793.9	6120.37	13630.7	10549.6	7083.79	2765.98	6911.94	4849.33	7667.63	24477.4	4142.46	6215.11	18046.1	7593.13	6460.03	30929.1	9364.98	22670.5	18597	3543.55	4837.48
A0A0D9QVU3	A0A0D9QVU3	A0A0D9QVU3_CHLSB	PDF		8908.06	5541.99	7987.59	6856.87	8759.35	7601.15	6777.62	7881.28	9381.77	8150.04	8230.13	6551.25	12079.2	10868.5	11396.3	8091.93	7962.15	8281.41	9717.15	7845.12	8728.94	7982.3	8627.28	7764.14	9338.15	8655.59	8844.77	9605.41	8988.57	10739.6	9988.56	8902.42	9073.95	8210.48	7213.49	11079.3	7667.5	7244.79	9385.03	7155.15	10761.2	7937.41	10127.7	8846.26	10677.8
A0A0D9QVU4	A0A0D9QVU4	A0A0D9QVU4_CHLSB	ARAP1		33341.4	25584.3	29178.3	32862.6	25476.2	29532.4	27927.2	28976.1	26198.5	27577.1	26411	26330.2	27607.2	25079.2	27154.8	32559.3	28750.5	29304.8	30359.4	29370.3	28575.1	27870	28782.6	26622.3	31039.9	25944.6	28834.8	28299.9	26941.9	27369	32680.9	31108.4	29455.1	30282.4	31269.9	24950.7	28533.6	27007.6	24706.3	29510.4	18040.3	25812.8	26583.3	26517.7	26584.6
A0A0D9QVU5	A0A0D9QVU5	A0A0D9QVU5_CHLSB	RAP1GDS1		17737.6	15627.8	17456	18067.6	17593.9	17389.3	15768.9	17595.4	16112	17915.9	18087.8	18392.7	18086.1	19305	19141.1	17065.1	15490.6	16446	17182.9	16432.3	18024.4	16490	18315.5	19195.7	18065.6	18680.6	16525.6	18964.5	19547	18818.8	17481.6	15680.5	15401.8	16927.6	16962.9	15793.9	17657.3	18487.7	15351.7	17510	15967.7	16493.1	16646.5	19877.7	18813.8
A0A0D9QVU6	A0A0D9QVU6	A0A0D9QVU6_CHLSB	COG8		11451.8	16531.8	13900	12064.6	14838.2	13422.7	12211.4	16484.1	10712.2	9600.58	13988.7	13956	13404.9	16833.8	14633.1	14374.3	14508.7	13466	14494.9	15388.8	10953.3	14692.8	12255.5	12624.4	11149.3	10625.7	9598.07	11432	14252	11745.3	18269.7	14962.7	13555.1	14271.5	13957.7	13769.6	13677.1	13671.9	11356.8	14129.8	11918.9	10652	14287.8	15599	12527.5
A0A0D9QVU9	A0A0D9QVU9	A0A0D9QVU9_CHLSB	NIP7		31003.8	49737.6	42796.7	45872.8	48836.2	45069.3	36955.7	46896.7	34304.4	38132.4	53901.2	55071.9	48281.8	48364.4	45065.2	38376.6	43352.2	36538.3	43102.4	40757.1	42557.3	47060	49786.3	44129.5	36717.6	51171.8	37681.7	46446.3	55071.1	45519.1	41557.4	41678.9	35566.4	40261	51429.5	31604.4	41126	43830.3	32831.2	45407.4	27727.8	33425.4	34957.1	53053.2	45524.6
A0A0D9QVV2	A0A0D9QVV2	A0A0D9QVV2_CHLSB	TSPAN8		4868.99	4917.04	2225.29	4900.41	2597.11	3073.63	5781.08	3555.74	2700.48	4741.63	4409.17	5536.38	4579.54	3751.17	4559.94	4606.06	3875.81	3143.19	4455.27	3277.86	3306.23	5410.78	3486.04	5226.96	7064.32	5108.22	6287.57	6694.62	3331.24	3709.1	5112.53	2317.76	4483.35	4733.56	3009.01	3640.39	6972.39	7083.12	3941.71	7687.63	2673.94	4631.76	3137.54	4793.49	5066.98
A0A0D9QVV3	A0A0D9QVV3	A0A0D9QVV3_CHLSB	HELZ		9726.01	12285.6	12391.2	12504.1	12230.4	11274.8	10466.1	13479.8	10210.3	8770.88	10686	12172.2	11317.8	11634.2	9494.18	12658.2	12888.8	11044.4	11926.9	11094.8	9961.68	11433.1	13564.4	12693.2	9990.83	11008.2	7326.43	9180.31	11242.3	11370.4	9225.95	11060.3	9457.16	11427.9	10441.5	7400.41	9093.34	10248.4	7857.8	10708.4	3877.08	7888.57	10066.7	11117.5	10665.7
A0A0D9QVV8	A0A0D9QVV8	A0A0D9QVV8_CHLSB	CLPB		17620.2	16527.1	15719.7	16891.5	15925.9	16499.5	16325.2	16863.8	17857.4	16607.6	14435.8	15494.1	18339	17329.6	16107.8	16727.8	15614.4	16819.4	16746.3	16046.5	17393	17984.4	15121.2	18064.3	16941.4	14249	14545.7	17181.6	15532.9	16263.5	17140.4	15777.7	17755.3	18726.9	15325.4	16814.5	17022.6	16374.4	16492.6	15296.7	12734.9	14788.7	17206.3	15747.3	17807.7
A0A0D9QVV9	A0A0D9QVV9	A0A0D9QVV9_CHLSB			457.956	818.093	604.419					660.339	309.759	370.694						452.014		640.54		538.69	214.977		271.268	310.202								614.173	349.434	892.16	145.655	433.502	560.593	452.634					282.824		352.009
A0A0D9QVW2	A0A0D9QVW2	A0A0D9QVW2_CHLSB			8405.4	7150.48	7237.37	6961.01	7293.18	7170.32	5784.46	6356.13	5986.84	4854.14	6038.69	6562.45	5430.14	5725.39	4958.34	6844.62	7269.93	6528.26	7234.49	6779.44	7365.57	6652.34	6267.25	6096.95	5303.48	4394.44	4438.46	6067.95	5991.99	5769.63	7427.39	7582.22	7321.08	7466.32	6977.03	6119.35	6625.56	6675.86	5365.98	6383.23	5439.26	5067.42	6779.53	6003.67	5339.97
A0A0D9QVW3	A0A0D9QVW3	A0A0D9QVW3_CHLSB	TERF2		5365.29	2787.73	3736.84	4915.5	5393.66	4841.67	5943.21	4813.53	4739.56	5782.89	5383.41	4645.7	5323.79	5013.16	6748.83	6242.57	6169.97	5241.87	6062.91	5281.34	5261.99	5312.56	6174.3	5001.3	4962.92	5916.68	5639.93	5438.07	5145.23	5741	5948.21	6543.73	5840.8	5890.97	4118.66	5858.18	6132.68	4953.92	5498.18	5975.55	8816.18	9239.91	6446.52	5600.02	6303.78
A0A0D9QVW6	A0A0D9QVW6	A0A0D9QVW6_CHLSB	CYB5B		9424.94	10919.4	10791.7	7297.26	12641.5	15862.8	23569.4	6528.7	12941	13017.5	7820.98	9674.04	13185.3	15946	15788.3	10132.6	16722.2	21514.6	15063.6	13574.1	13794.5	12716.3	8514.02	9928.21	20923.8	18185.5	13050.6	10930.2	14289.1	11052.5	18881.4	24119.2	26107.2	17002.3	11555.6	12084.2	27771.5	29524.8	13215.9	18289.3	20552.7	16679.8	14235.5	10051.1	13496.8
A0A0D9QVW7	A0A0D9QVW7	A0A0D9QVW7_CHLSB	NFAT5		1526.98	694.898	1664.03	1520.28	912.55	1116.27	1447.23		1472.44		981.22		1411.35	1383.59	1593.99	1362.33		1198.06	838.964	846.492	1472.45	1513.4		927.075		1371.19	1118.13	2063	1269.08	2131.66	1606.86			1533.32	1173.1	2637.5	1520.08	586.253	1739.25	1612.68		576.601	2419.22	894.498	1319.37
A0A0D9QVX0	A0A0D9QVX0	A0A0D9QVX0_CHLSB	PDLIM5		16531.4	14533.5	16575.3	16061.5	15991.7	14874.2	13545.8	16938.6	14072.1	12990.7	15778.4	15771.4	14051.3	14671.8	13178.5	17004	16263.1	14766	16614.9	13018.2	14269.1	14435.4	15260.9	14702.7	14062.1	16375.6	14433.2	15761.5	13715.3	14455.6	15110.1	13983.1	14993.9	15697.4	14765.6	15072.1	13652.3	13885.8	13871.1	13988.5	20257.2	13238.2	14590.8	14414	14822.9
A0A0D9QVX2	A0A0D9QVX2	A0A0D9QVX2_CHLSB	NQO1		38936.6	19689	29125.7	28729.7	28945.6	30382.2	39530.4	24403	45109.1	39352.8	31893.2	26825.1	41075	33411.7	43118.2	30183.2	25781.6	33724.9	27584.7	24514.7	32673	37633.6	38484.2	43379.7	42425.3	37124.6	40950.1	39289.6	36459.9	40646.8	34276.4	21811.4	35222.8	32548.8	24222.2	29961.1	38850	32259.3	39561.3	40961.5	34222.1	40379.5	33610	32100.3	42863.7
A0A0D9QVX3	A0A0D9QVX3	A0A0D9QVX3_CHLSB	INPPL1		5354.9	4746.13	4614.09	6730.1	5655.7	6708.62	5665.06	5280.51	5362.95	5120.37	5647.37	5593.04	5427.09	4198.14	4899.48	5787.45	4314.08	4806.1	5647.32	4635.04	5030.08	4767.99	6155.89	5384.61	4774.59	5010.81	5112	5437.01	6055.39	4237.07	4683.9	4982.76	5248.47	5625.46	5169.84	4413.27	4572.79	6060.22	4128.48	4871.4	1971.23	4574.64	5299.63	5910.8	4698.02
A0A0D9QVX5	A0A0D9QVX5	A0A0D9QVX5_CHLSB	NOB1		37795.9	38669.5	40746.8	41090.7	46304.4	43511	38510.4	37203.3	39130.8	34264.6	42078.3	38839.1	36061.7	39174.9	37740	38642.3	46250.1	35059.8	41316.1	39900.8	42165.4	38161.6	43564.8	41620.1	34113.6	41348.1	36850	34951	38506	36625.6	37934.1	50157.9	41340.8	40615.1	42301.6	42033.3	38915.6	45381	36394.4	36318.1	39664.4	36792.5	37741	41969	40508.4
A0A0D9QVX9;A0A0D9QVY4;A0A0D9QW90;A0A0D9QW91;A0A0D9R3Q4;A0A0D9R5P1;A0A0D9R753;A0A0D9R761;A0A0D9R910;A0A0D9RVP9;A0A0D9RVQ4;A0A0D9RXV0;A0A0D9RZ15;A0A0D9RZ85;A0A0D9RZ87;A0A0D9S598;A0A0D9S5S1;A0A0D9S996;A0A0D9S9J3	A0A0D9QVX9;A0A0D9QVY4;A0A0D9QW90;A0A0D9QW91;A0A0D9R3Q4;A0A0D9R5P1;A0A0D9R753;A0A0D9R761;A0A0D9R910;A0A0D9RVP9;A0A0D9RVQ4;A0A0D9RXV0;A0A0D9RZ15;A0A0D9RZ85;A0A0D9RZ87;A0A0D9S598;A0A0D9S5S1;A0A0D9S996;A0A0D9S9J3	A0A0D9QVX9_CHLSB;A0A0D9QVY4_CHLSB;A0A0D9QW90_CHLSB;A0A0D9QW91_CHLSB;A0A0D9R3Q4_CHLSB;A0A0D9R5P1_CHLSB;A0A0D9R753_CHLSB;A0A0D9R761_CHLSB;A0A0D9R910_CHLSB;A0A0D9RVP9_CHLSB;A0A0D9RVQ4_CHLSB;A0A0D9RXV0_CHLSB;A0A0D9RZ15_CHLSB;A0A0D9RZ85_CHLSB;A0A0D9RZ87_CHLSB;A0A0D9S598_CHLSB;A0A0D9S5S1_CHLSB;A0A0D9S996_CHLSB;A0A0D9S9J3_CHLSB	ZFP3;ZKSCAN7;ZNF121;ZNF19;ZNF23;ZNF250;ZNF286A;ZNF3;ZNF397;ZNF527;ZNF569;ZNF605;ZNF614;ZNF658;ZSCAN30								1068.92				631.462		1250.72												1002.67			543.121
A0A0D9QVY1	A0A0D9QVY1	A0A0D9QVY1_CHLSB	PSMD12		74239	55247.5	63133.9	65650.3	57972.9	70327.1	74604.1	51540	76626.4	82303.6	58431.9	60701.6	69018.7	55364	66800.6	65831.2	54677.3	65190.4	66253.3	56543.8	71699	66839.2	60962.8	71156.7	81645.3	69393.5	76034.7	74503.9	66246.4	71773.9	69541.6	49470.3	67857.7	74954.8	56535.7	78124.5	68952.1	57495.9	71347.9	78207.6	74111.5	81261.2	51567.6	59805.4	69256.9
A0A0D9QVY3	A0A0D9QVY3	A0A0D9QVY3_CHLSB	PITPNC1								805.957			1754.54									1299.2		1193.2		860.554	1433.85	1222.58		1245.78							711.941		2017.66			1140.52			1678.64	932.7
A0A0D9QVY5	A0A0D9QVY5	A0A0D9QVY5_CHLSB	PSMD7		126955	134200	125004	130157	132731	127334	123595	162689	128394	131512	148262	147041	128076	143054	128530	128966	126080	122435	127278	138268	133766	142442	136305	139124	126672	130683	116462	131608	136237	127309	113635	128213	113430	136768	144295	103650	124600	136070	118176	128977	93383.7	102720	141209	133249	128381
A0A0D9QVY7	A0A0D9QVY7	A0A0D9QVY7_CHLSB	NOL11		35402.2	36929.7	36632.3	34341.8	39417	37362.5	31516.4	35858.4	31747.3	30143.1	35117.3	35922.5	34508.8	40223.4	33903.4	37822	36284.2	35050.8	37974.9	38001.1	37166	36572.8	38007.9	34835.2	31052.9	34668.3	33685.3	31101.2	35670.9	33266.9	34200.3	36393.5	34468.8	35398.9	37670.4	33840.9	35133.9	32735.1	29803.5	31310	24595.3	26121.7	28324.7	36005.8	33642.3
A0A0D9QVZ5	A0A0D9QVZ5	A0A0D9QVZ5_CHLSB	CNOT2		13561.7	9794.01	11747.1	11628	11070.1	11026.6	13378.3	8534.93	12171.3	13636.9	9902.47	11438.9	12350.8	9665.21	11236.6	15384.4	10194.5	13327.5	12844.9	10393.9	11815.9	13367.7	9178.18	12655.6	12053	11025.1	12762.2	12039.4	9582.53	12194.9	12170	10502.8	13043.1	13350.9	9592.62	13082.3	11717.2	8738.26	11143.8	12895.1	9532.32	10759.5	13375.4	9572.42	12056.3
A0A0D9QW04	A0A0D9QW04	A0A0D9QW04_CHLSB	SMARCAD1		16686.8	16199.7	17772.3	16312.7	18559.6	18821.5	16768.2	18553.1	17314.8	18491.2	14741.2	16512.3	15660.7	17710.6	16061.6	18174.1	19990.4	17014.7	16692.4	17457.4	15707.7	19342.5	17863.3	19217.1	21253.9	17013.4	16653.2	18341.5	17213.3	21241.8	20301.8	18235.9	17081.2	16492.6	17156.1	18537.9	20403.5	19658.9	17466.7	17654.9	18184.4	21841.6	16363.6	16473.7	18278.9
A0A0D9QW06	A0A0D9QW06	A0A0D9QW06_CHLSB	RAB3IP		20453.5	15326.6	21180.6	23428.4	19762.9	22704	28049.3	19886.6	30499.5	26971.1	23722	23914.5	23545.3	19794.9	25096.5	23723.9	18050	21231.6	22901.3	18026.6	27989	25446.4	23900.2	26158.5	27526.2	27629.3	31441.7	26362.2	23274.5	25120	23189.1	19782.8	25136.3	25492.5	20588.8	27351.9	24985.9	20882.7	30776.3	30594.9	23546	25110	29352.8	24236.9	27062.7
A0A0D9QW07	A0A0D9QW07	A0A0D9QW07_CHLSB	BPTF		8820.5	6519.17	7000.27	6195.35	8114.07	10280.7	10304.2	9162.02	9115.36	7886.93	6487.62	6197.96	8029.73	7988.74	9565.06	8145.4	7454.7	11717.3	8078.07	6999.64	9336.71	9868.62	7953.32	7256.54	7937.95	6715.98	7240.7	9179.81	5718.55	8530.85	8741.19	6456.28	11350	7090.34	9187.73	7091.03	7321.1	7323.45	9011.81	8343.15		8339.14	9289.71	5894.51	7282.43
A0A0D9QW08	A0A0D9QW08	A0A0D9QW08_CHLSB	LAMTOR1		17109.8	30938.7	25941.5	25126.2	24891.7	24179	19429.6	21522.8	15732.6	14357.7	21504	21239.2	23855.9	30404.5	26264	20835.7	31466.8	24069.1	23666.6	29394.3	18512	22208.3	23233.4	23043.9	20565	25496	15929.4	22664.1	25804.9	21580.6	20665.6	33189.4	25387.6	19730.3	29866.9	17524.5	24162.9	31266.2	17186.7	22895.7	15399.5	18761.1	21199.5	28994.4	22818.9
A0A0D9QW15	A0A0D9QW15	A0A0D9QW15_CHLSB	KPNA2		183951	130198	155823	171083	172099	164259	113421	86892.1	99085.4	99358.9	91439.2	86492.1	90736.3	93725.5	88957.8	186143	129711	170162	165449	136933	186224	130501	96931.5	108418	94098.2	90807.9	97124.4	94977.2	92254.2	99673.9	206454	132646	173855	166990	157237	187831	119913	87564.2	111177	92625.3	75109	92656.9	89993.5	78460.7	83085.6
A0A0D9QW17	A0A0D9QW17	A0A0D9QW17_CHLSB	NUMA1		38286.1	37549.9	38952.4	37333	39604.3	39265.8	37110.4	39844.8	39310.2	34337	39744	38842.8	40184.1	41593.7	39789.9	36238.5	41085.6	38888.2	38739.1	39263.4	38825.1	40934.3	41084.7	39949.9	37190.1	33556.3	33339.5	40567.5	39538.7	39348.8	35953.8	39957.9	38942.7	37227.7	38778	34520.8	39625.4	42251.8	37883.7	39175	25428.3	33134.5	41013.7	39882.4	40658.8
A0A0D9QW25	A0A0D9QW25	A0A0D9QW25_CHLSB	CCT2		402489	310316	381062	378515	342849	370891	378672	344090	431345	395654	394715	375190	362070	373992	379680	401330	333066	383755	388177	359251	409101	382726	393840	440396	384953	455925	453315	402916	401213	424650	372178	327480	374132	363089	376148	393036	373213	365934	430094	393258	405818	405053	462533	394012	423919
A0A0D9QW30	A0A0D9QW30	A0A0D9QW30_CHLSB	DHX38		11646.9	10255.7	10662.1	11688.8	12437.5	12537.4	12895	10958.1	11913.4	11403.8	11085.6	10748.4	10816.1	10679.1	11932.9	11689.2	12469.4	12290.2	11792.1	11771.7	13233.3	11733.7	11420.8	12583.2	12620.8	12242.2	12360.4	11463.8	12035.8	11518.5	10934.6	15348.4	11573.2	11142.5	12418.6	11381.7	11267.2	12753.7	12409.2	11343.9	11309	12279.6	10231.1	12087.7	11603.2
A0A0D9QW36	A0A0D9QW36	A0A0D9QW36_CHLSB	YEATS4		8139.73	8857.06	9247.27	9408.32	9469.88	9106.23	7986.95	10521	7106.77	7664.85	8888.1	9075.58	8073.86	9240.92	6875.61	7866.85	6963.87	7560.17	9800.73	9063.32	7905.37	9388.49	9539.06	9811.99	7987.04	9088.71	5966.5	7610.99	9667.64	8505.86	7089.49	9658.59	6744.57	8801.38	9582.02	5202.63	9043.19	11742.9	6163.68	7293.44	4871.15	3733.59	6256.9	8994.58	6594.7
A0A0D9QW39	A0A0D9QW39	A0A0D9QW39_CHLSB	ZNF146			3686.61			2464.71					3357										3144.8						3097.86				3011.38		1311.11	674.477					1665.67	3434.55						3281.15
A0A0D9QW41	A0A0D9QW41	A0A0D9QW41_CHLSB	TXNL4B		4019.54	9039.54	6667.56	6891.72	7570.96	6010.01	5328.84	8154.99	5424.59	4039.91	7305.54	8213.53	5884.12	5916.19	5039.34	5593.23	6857.38	4739.11	6193.58	8783.53	4814.36	5876.86	7172.95	7007.03	4649.93	6770.39	3783.07	5372.08	6952.86	6586.72	5916.84	7505.51	4141.07	7602.49	7967.41	2330.62	5665.95	9101.57	3232.54	6760.35	1724.98	2295.01	2409.62	5945.11	4466.13
A0A0D9QW44	A0A0D9QW44	A0A0D9QW44_CHLSB	SNCA		4360.31	4945.19	3480.8	4205.78	3186.54	4157	4711.31	3933.48	3269.59	3982.7	4228.97	4329.46	4429.82	4252.34	3550	5415.49	2797.55	3657.69	5126.77	3755.29	3688.81	4427.94	4210.01	3783.18	4642.14	3538.87	2735.92	4997.34	3024.09	4278.97	2930.08	2665.26	2873.41	3247.68	2606.9		4156.94	3740.61	3529.25	3698.62	3274.8	2270.19	2557.57	3644.76	3153.57
A0A0D9QW47	A0A0D9QW47	A0A0D9QW47_CHLSB	CPSF6		31785.3	35809.7	37364.2	35601.1	33370	32942.4	30504.5	37574.8	32312.9	34014.1	38241.5	34733.7	35168.6	32329.3	33719.3	34968.1	30737.4	33621.2	35186.5	36057.6	32892.3	32727.7	36611.1	35950.5	33582.5	33845.1	32307.3	36004.1	36551.1	36374.3	32052.2	29202	30164.2	35928.5	34373.1	26821.9	31838.6	33191.3	30917.7	32341.1	30109.7	34514.1	37491.9	40700.8	34095
A0A0D9QW51	A0A0D9QW51	A0A0D9QW51_CHLSB	NUP98		19162.9	15921.1	18263.6	18236.4	19162.1	19518.9	21235.1	17723.9	19405.5	19825.4	18636.6	18530.5	18557.6	18656.7	19373.1	20009.5	17618.7	19428	19305.3	16700.4	20717	19975.7	18737.9	20719.4	19875.8	20716.6	19513.3	20097.6	19201.4	19463.3	19830.9	17114.8	20336	21353.7	19521.9	20041.5	21216.6	17655.8	18613.1	20077.8	19184.2	19739.8	18226.4	19962.5	20343.2
A0A0D9QW56	A0A0D9QW56	A0A0D9QW56_CHLSB	DHODH		2965.46	4514.04	4205.54	2811.69	3189.01		1949.01		3048.42	1769.18		3534.47	3427.73	3446.13	2994.36	1268.99	3186.83	1959.96	3446.66	2973.76	3646	3563.63	3387.82	2724.78	2751.97	2605.58	4137.66	2576.18	3792.9	3106.47		2084.19	3252.16	4087.95	3857.36	6431.31	4624.54	2632.03	3152.1	2488.08		6285.55	2851.72	3790.74	3569.32
A0A0D9QW57	A0A0D9QW57	A0A0D9QW57_CHLSB	PRKAR1A		36987.9	26957.4	27102.3	28818.7	27411.1	28175.4	24334.8	20051.5	23655	22118.7	16858.9	18644.7	18676.7	17532.1	17003.1	30401.6	35417.4	31197.1	32578.6	22174.2	30830.5	28958.3	26016.4	27293.9	23461.2	23870.2	24691.1	23191.7	21834.1	20500.8	28305	31511.5	32182.5	29508.5	27614.3	30010	26584.9	24634.2	27863	25619.8	29263.1	22691.3	23685	23888.3	21821.1
A0A0D9QW62	A0A0D9QW62	A0A0D9QW62_CHLSB	RHOG		7286.01	5646.99	6926.27	5824.16	6648.23	6818.8	10122.3	5642.42	7679.96	7428.38	6824.86	7279.18	9058.5	9198.99	11329.8	7145.79	10195.9	9857.35	6930.62	5624.2	6435.32	7528.73	7086.93	7550	9444.76	7768.37	7831.36	7223.79	7957.03	8152.44	6520.22	6927.36	10802.9	6756.52	6895.06	7740.31	10233.5	10082.8	9154.87	8148.85	5332.87	7076.45	6233.28	7477.25	10670.1
A0A0D9QW63	A0A0D9QW63	A0A0D9QW63_CHLSB	CAPNS1		48156.5	27134.3	40850.1	43812.9	41018.1	39981.2	40977.2	37095.5	49731.7	45560.6	49152.7	33579.2	40809.9	38379.8	50709.1	46916.7	38668.9	51822.5	44944.5	45779.1	54782.1	40934.5	44942.1	48141.6	41974.4	42855.8	54110.5	42212.5	45619.9	47013.5	45058	38131.2	45774.5	42154.1	42976.3	59449.6	34580.6	40581.8	54785.9	40786.8	50312.2	50833.4	53340.4	44781.8	46175.8
A0A0D9QW65	A0A0D9QW65	A0A0D9QW65_CHLSB	STIM1		12034.3	19572.3	15809.8	12406.2	14129.2	14596	16690.9	15394.7	12517.1	11151.5	14488.4	14543.6	14730.4	18926.5	19473.5	12000.8	24111.3	21759	14255.7	18435	11221.4	13184	14066.7	13014.4	15505.4	12823	11364.7	14057.2	14576.9	13195.6	13390.6	20939.1	22333.7	12934	14390.3	10658.7	18308.5	25191.7	13285.1	12803.7	13243.6	9723.54	10643	14982	16480.5
A0A0D9QW67	A0A0D9QW67	A0A0D9QW67_CHLSB	TBCB		23886.8	16620	15470.4	17838.1	18469.8	18877	25588.8	14875.2	23613.4	27672.1	13164.7	17102.2	20844.5	13655.2	20211	20329	14012.4	20793.8	18202.6	11160.1	23420.2	20497.1	20356.6	20325.4	24784.6	23491.1	23879.3	18896.4	18853	24566.9	20839.1	10368.6	22948.9	21859	14784	27748.7	19311.9	12971.7	25692.9	23196.1	20835.5	26024.2	19893.2	15964.6	22568.5
A0A0D9QW68	A0A0D9QW68	A0A0D9QW68_CHLSB	NUP107		15041	14018	15210.6	14836.6	15702.9	15438.6	14105.1	13822.7	15344.9	13962.3	15231.3	14634.5	13500.3	14542	14412	14105.6	15108.4	13800.9	12455.8	13684.2	14916.7	13940.5	15211.9	12085.9	12039	13290.2	13408.8	13889.2	15586.5	15307.9	14935.3	13106.1	14580.1	14523.2	14333.3	13399.6	13202.6	13812	13535.9	14153.8	12648.6	11813.1	10280.8	16437.6	13820.8
A0A0D9QW69	A0A0D9QW69	A0A0D9QW69_CHLSB	RRM1		31704.7	22341.8	29409.4	27853.3	26388.2	27398.5	26777.4	22495	30735.7	29462.4	23440.1	24662	25103.3	20443.2	23159.7	29827.7	25141.9	27409.3	26525.6	22258.1	28494.6	28571.3	28178.8	28208	26616.8	28134.7	26569.2	25487.1	24665.3	24592.2	28687.4	22160	29708.1	29702.6	25963	31084.2	25649.2	22801.3	27722.3	27088.4	22445.1	26208	20925.9	21860.2	22623.6
A0A0D9QW70	A0A0D9QW70	A0A0D9QW70_CHLSB	TRIM21		3202.39	5982.21	4092.22	4707.6	5719.51	4594.53	3297.59	5136.2	3554.81	3494.82	5987.87	5612.31	1542.86	4652.32	3627.1	3308.43	3820.42	3350.27	3675.05	4572.92	3044.4	5552.38	6958.41	4721.34	3225.27	3973.02	3427.12		4891.75	3760.96	3306.84		4776.43	3973.33	6062.83	4017.05	4062.32	6236.59	2726.85	4644.2		5212.57	3087.26	4970.99	3436.61
A0A0D9QW72	A0A0D9QW72	A0A0D9QW72_CHLSB	POLR2I		5020.49	4657.19	6380.7	7890.64	5506.72	6560.13	5298.57	3687.89	5173.41	4451.65	4830.73	4646.51	4234.05	3553.01	2691.54	6412.07	5277.79	5740.09	6253.9	6172.78	6331.89	5935.14	5617.23	6064.05	5496.62	5464.35	4016.31	4010.89	4532.07	3456.91	5724.06	5614.35	5590.37	5768.25	4978.49	6089.47	5489.1	5396.15	4605.51	4939.76	6403.94	4166.42	4594.04	3443.15	3887.23
A0A0D9QW77	A0A0D9QW77	A0A0D9QW77_CHLSB	IST1		23871.3	23295.7	22810.1	21794	22543	24403.4	22427.8	23410.6	23329.6	23091.3	24484.7	22192.9	23905.3	24116.2	22287.5	26617.2	22599.9	24172	23509.8	20877.8	21906	25158.8	22474.2	23125.7	25319.8	21585	24138	23927.6	24542	22362.4	26586.9	19044.8	26099.2	23592.5	21002.5	21178.7	25754.1	26612.5	22205.5	25795.3	26704.8	25630.9	17726.5	23803.5	25772.6
A0A0D9QW79;A0A0D9QW82	A0A0D9QW79;A0A0D9QW82	A0A0D9QW79_CHLSB;A0A0D9QW82_CHLSB			5995.16	10882.4	8145.39	5810.75	8718.58	6495.72	3714.36	5232.24	2429.71	2380.51	5330.93	4774.12	4477.83	4327.6	5036.85	5332.11	7489.91	3836.77	3739.66	5158.78	4033.78	2965.08	5107.59	3574.09	1986.6	1915.09	1930.74	3866.11	5169.68	3975.61	6524.99	6741.41	6958.11	5560.19	5065.71	2995.1	4003.54	2020.69		2572.19		2347.85	1157.18	5189.38	5692.67
A0A0D9QW79;A0A0D9QW82;A0A0D9QW84	A0A0D9QW79;A0A0D9QW82;A0A0D9QW84	A0A0D9QW79_CHLSB;A0A0D9QW82_CHLSB;A0A0D9QW84_CHLSB	HBE1		67323.1	4296.61	6713.89	5854.76	6761.77		10540.6		89336.3	19400.4			5702.93	7535.26	9039.94	8617.75	7021.19	28205		6087.52	12724		5922.03	7049.77	11740.1		83573		7521.68	9862.65	18001.5	6594.16	82228.5	7607.85		246301	8539.72		112581	10282.8	1.41E+06	613915	86812.2	6544.52	33117.7
A0A0D9QW82	A0A0D9QW82	A0A0D9QW82_CHLSB			237610	201061	175362	147273	152204	179010	161033	83219	118883	117643	81052.7	113016	181084	147107	212929	287279	267873	266176	170595	167985	154299	102688	106193	110387	123014	162769	111774	114698	136081	171405	207469	185551	168768	124881	133019	97388.2	114478	88609.9	89719.3	83014.4	377675	160773	115371	108961	117284
A0A0D9QW83	A0A0D9QW83	A0A0D9QW83_CHLSB	AP1G1		17936.1	11965.6	13725.5	14778.6	15512.7	15204.8	15808.5	13254.7	15687.8	18809.1	13424.7	14541.1	17973	14675.2	15880	12919.5	13374	14332.4	14594	11146.8	13724.1	15914.3	13220.8	15330.4	19404.1	17098.8	18476.7	16137.1	17767.4	17154.8	16668.4	9975.21	15180.2	16329.6	12452	12666.1	17503.3	14381.7	15572.8	19102.2	13869.4	15918.4	11014.1	16502	15151.1
A0A0D9QWA0	A0A0D9QWA0	A0A0D9QWA0_CHLSB	TRIM5		10650.9	8911.06	11440.2	9170.14	10155.5	10128.3	10803.4	9068.74	10708.2	10630.9	8882.85	8366.45	8496.35	8253.91	8953.38	12490.7	11786.4	13028.9	10496.6	9523.54	10667.3	12612.7	11353.9	12464.1	10300.4	9866.28	8529.98	8795.63	8073.32	9102.92	10424.9	7567.58	12083.8	10575.7	8096.63	11071.5	10108.9	9424.38	9485.21	10896.2	7692.35	8739.97	8886.15	8751.84	9892.76
A0A0D9QWA0;A0A0D9QW85	A0A0D9QWA0;A0A0D9QW85	A0A0D9QW85_CHLSB;A0A0D9QWA0_CHLSB	TRIM34;TRIM5				2939.25				3474.63		6987.6	5823.65					2309.41	3449.66	2412.5				3342.35	4182.76		3164.34	5279.88	4064.57	7757.07	4369.55			5662.48		7051.41	3448.08		7026.01	3768.1		7838.81	3373.96	4744.8	6738.43	5592.22		3515.59
A0A0D9QWA0;Q50EW9	A0A0D9QWA0;Q50EW9	A0A0D9QWA0_CHLSB;Q50EW9_CHLSB	TRIM5										242.95												92.6029				339.616		248.945						150.966			359.485	160.999	212.175
A0A0D9QWA1	A0A0D9QWA1	A0A0D9QWA1_CHLSB	PYURF		2314.64	3654	2820.11	4248.92		3494.44	3887	3979.47	3409.2	2311.21	3271.16	3421.15	3752.85	3702.78	4887.76	2966.47			2632.3	2713.01	3338.88	1954.42	2253.77	2831.84	3913.18	2218.2			3065.51				1598.8	3598.35	2729.87	1918.86			2937.64	2482.06					2448.56
A0A0D9QWB0	A0A0D9QWB0	A0A0D9QWB0_CHLSB			18777.3	35000.7	28858.1	13747.4	15042.6	11903.5	4693.56	13149.2			11871.2	9474.35	8191.57	20098.3	10591.7	31880.1	47606.6	32492.7	20485.4	27858.4	8353.35	7662.27	12180.2	7843.9	2834.12	8267.5		12962.5	14905.4	13903.3		68265.1	23136.2	6484.9	23579.8			8520				8140.9	5352.32	18128.6
A0A0D9QWB2	A0A0D9QWB2	A0A0D9QWB2_CHLSB	PKD2		3854.72	4110.7	5517.45	3908.47	3956.93	5297.1	7194.72	3689.68	4601.78	4864.27	3188.95	3339.85	3787.93	5079.11	5772.22	3899	6790.82	8499.18	4348.75	3380.68	4298.94	4510.26	4828.5	4803.02	5924.78	2608.61	5355.07	2969.72	2457.22	3204.71	4325.36	5809.63	7733.48	4474.08	6360.1	4585.29	8401.19	7394.34	5033.56	4945.77		2694.82	4413.01	3201.14	5400.84
A0A0D9QWB5	A0A0D9QWB5	A0A0D9QWB5_CHLSB	SPP1		4820.51	3002.35	4729.74	5626.7	5119.91	4383.4	5481.81		3104.82	3546.8			2725.12			3402.16	4431.42	5199.75	5768.83	2804.45	5615.12	6089.15	2783.17	2627.27	2501.58		2585.91	2680.59		3036.8	3770.32	4063.5	4259.21	5535.29	2712.39	6673.88	3766.62	1692.06	4454.99	3060.73	10572.8	5761.98	4270.7		3571.35
A0A0D9QWC8	A0A0D9QWC8	A0A0D9QWC8_CHLSB	NUDT9		10105.8	8429.52	7217.25	8316.8	6714.73	9182.6	8867.77	9160.92	8289.32	10281.7	8156.19	8366.82	8173.4	6338.41	7751.75	8991.5	6786.61	7978.24	9373.38	9097.72	9427.43	9201.87	7498.42	8069.78	9274.97	9657.84	9374.71	9792.19	8543.84	8912.32	8960.65	8350.1	8753.71	8782.01	7526.48	9687.28	8829.37	8076.84	9260.52	9222.73	15053.4	8505.82	10200.2	7361.38	8566.83
A0A0D9QWC9	A0A0D9QWC9	A0A0D9QWC9_CHLSB	ARFIP2		6769.91	5955.4	6376.01	5973.8	5078.04	7365.5	7482.7	6371.42	7152.79	8084.62	7330.52	6633.88	6676.59	5169.89	7277.35	7261.95	5421.58	6092.79	7456.27	6764.14	7610.25	8560.38	6879.89	8158.13	6413.02	6681.38	7606.71	7058.32	5841.29	6370.53	8736.7	6155.4	7252.59	6582.99	6559.1	7638.8	7068.12	6092.76	6056.73	6530.53	10698.5	7451.38	6396.32	6072.96	5989.51
A0A0D9QWD1	A0A0D9QWD1	A0A0D9QWD1_CHLSB	TIMM10B		2940.65		2055.19	1288.48		2273.22	2089.86		1661.72	2218.98			1939.82	1509.18	2085.78	2068.14	1470.48	2730.79	3057.69	1139.53	3126.93	2879.36	1925.74		3013.96	3020.67	2356.28	1979.03	2448.33	1981.31	2181.43		1670.37	1312.63	1648.73	2285.4		1696.82	1715.71	1856.4		3491.34	2452.36		2209.92
A0A0D9QWD2	A0A0D9QWD2	A0A0D9QWD2_CHLSB	HSD17B11		15786.1	20612.2	19851.4	13740.9	17832.3	16171.4	27676.3	16186.8	17491.7	12555.3	15931.8	15971.2	20914.5	30314.2	28672	16448.3	28758.1	29327.5	16387.7	17961	15672.3	15645	14889.3	14669.4	22130.1	14460.1	15897.4	13432.3	16146.2	17335.1	20566.5	27871.8	30805.4	17767.4	17027.1	17542.7	27391.8	31510.9	19778.4	19089.6	16256.5	16416.3	11036.5	17040.2	23742.2
A0A0D9QWE5	A0A0D9QWE5	A0A0D9QWE5_CHLSB	PTPN13		8318.14	7240.36	8294.82	8268.53	8307.35	8511.59	9652.15	8429.45	9484.57	8466.6	8744.86	8958.49	9715.64	8294.32	8510.77	8140.36	7780.81	8528.28	7876.96	7174.53	7661.51	9014.45	8657	9095.05	9345.21	7798.3	7883.05	8322.13	8775.46	9077.25	8374.33	8212.43	8891.4	7856.49	7444.72	8279.39	8511.07	8529.41	8269.21	8153.83	6259.11	7604.35	8352.43	7871.06	8619.58
A0A0D9QWE8	A0A0D9QWE8	A0A0D9QWE8_CHLSB	LIN37		3675.28	2372.21	2576.75	1647.23	2410.37		2460.31	2402.53	3297.72	2641.96	1890.96		1809.16	1655.34		3027.92	2679.4	3612.14	2338.44		2364.93	1741.07	1743.1	2012.19	2582.92		3108.13	1855.58	1597.09	1543.48	1771.48	2608.62	2947.81	2466.49		3118.73	2514.25	2519.26	3379.52	1841.31			2893.32	2562.17	2027.63
A0A0D9QWF2	A0A0D9QWF2	A0A0D9QWF2_CHLSB	RRP8		27689.8	25146.8	28451.8	29533.4	26686.5	28997.8	28864.2	24478.7	25649.1	26497.9	27985.6	33364.9	25644.3	27949.8	28063.1	28682.7	31235.9	27555.3	30479.5	27579.6	29954.2	31711.5	26963.4	28953.1	28662.3	30360	23321.6	29301	29193.1	26063.4	31938.9	31127	24966.1	31713.7	31121.7	22594.2	27371.7	31639	25259.1	30476.8	20629.9	23770.8	32004.8	30693.4	28350.3
A0A0D9QWF4	A0A0D9QWF4	A0A0D9QWF4_CHLSB	TAF10		10352.1	9276.63	9950.68	10512.3	9973.25	8736.57	10267.9	8723.2	9726.75	7472.58	10429.5	8379.71	8284.33	7353.18	7852.47	10313.5	7066.89	9382.93	10982.2	8844.21	11495.2	11586.3	10361.4	11781.9	6877.3	8727.5	6066.07	8437.04	8571.22	9189.48	7487.34	8394.19	8293.65	12194.5	10292.7	10038.2	10674.7	7522.43	8936.82	8682.78	4949.72	7947.47	9777.03	11015.5	9648.28
A0A0D9QWF5	A0A0D9QWF5	A0A0D9QWF5_CHLSB	VAC14		14824.8	10729.1	13012.9	15342.4	14748	16427.1	14942.4	13767.8	14236.1	16987.1	11963.1	14901.8	14375.7	15027	14862.6	14736.4	13359	16187.5	12531.2	12751.4	16249.1	15012.9	16796.4	12706.6	14443.1	15739.3	14371.6	15456.9	14359.8	16248.9	18470.6	13187.2	17712.1	13636.1	12647.1	13766.2	11926	11894.3	11622.5	12356.4	15039.1	18467.4	15189.6	14941.6	16324.8
A0A0D9QWF6	A0A0D9QWF6	A0A0D9QWF6_CHLSB	ILK		43604.8	46964.5	43096.3	44056.2	41184.3	43890.6	42180.8	40810.8	42157.2	42409.7	43300.2	44263.6	44627.1	47667.2	43253.2	44646.1	45288	44105.8	42978.9	42343.1	42677.4	43348.4	50214.9	47149.1	42745	45072.3	44474.9	45920.1	43382	43991.6	43553	42476.7	39856.9	44185	45734.7	36536.2	43255.8	42289.8	39703.4	43732.3	41910	37776.8	38029.9	40709.9	40530
A0A0D9QWF7	A0A0D9QWF7	A0A0D9QWF7_CHLSB	CAND1		101171	92797.7	108193	112779	108304	120228	125206	101293	127254	123898	110914	112197	115144	123434	126786	109416	98904.5	108091	105134	100982	116052	117060	110922	121205	126133	104628	115509	117454	124491	124698	117965	94668.6	110558	116283	108876	106974	118810	108470	109637	128321	97181.6	110718	97169.7	118993	122430
A0A0D9QWF7;A0A0D9RAV7	A0A0D9QWF7;A0A0D9RAV7	A0A0D9QWF7_CHLSB;A0A0D9RAV7_CHLSB	CAND1;CAND2		15559.3	8875.63	10246.3	10777.2	9712.91	11039.4	16000.9	7943.23	14455	16100.8	9653.36	7863.87	9974.99	10840.7	11468.2	12761.8	12138.6	14250.7	9965.51	10428.5	15996.6	11234.9	8997.61	13691.4	12579.8	13380.2	15906.8	8690	8811.42	10576	12103.5	11159.5	14038	11326.4	11257.2	17016.2	9078.57	9023.63	13126.6	11919.5	16197.9	16331	14540.8	7875.91	11127
A0A0D9QWF8	A0A0D9QWF8	A0A0D9QWF8_CHLSB	TPP1		8142.9	9555.87	8040.19	7608.59	6696.44	7029.25	4593.21	4757.9	2612.47	2646.11	2801.85	2820.98	2296.35	2094.49	2692.49	8166.67	7345.94	8401.29	8647.65	10126.6	6792.14	6484.59	4761.95	5262.13	5673.46	3728	3889.51	3161.88	4170.03	2669.63	9642.95	10794.8	6863.18	7831.91	8058.8	5246.3	5342.33	4814.52	2356.66	3528.78	1114.81	1076.75	3013.56	2737.23	2281.1
A0A0D9QWG2	A0A0D9QWG2	A0A0D9QWG2_CHLSB	WDFY3						2236.59		1564.71	1411.82	1257.61	1395.58				2098.68		2224.4	1572.77				1670.34		1495.72	1791.3	1631.2	1837.63					2037.54	2067.29	1776.93	1644.08				2356.14		1932.16				1843.43	1798.77
A0A0D9QWH0	A0A0D9QWH0	A0A0D9QWH0_CHLSB	MRPL17		7738.88	13108.5	7973.74	9784.98	13269.6	9852.74	6615.14	15039.9	8365.12	5784.44	11278.5	11086.3	9639.82	10308	7835.1	11135.5	11200.7	7722.29	13406.6	13168.4	9550.02	12851.1	10327.9	10425.3	6829.92	7645.62	4862.34	9196.7	11245.6	11220.6	8003.23	13377.3	8290.31	11271	13711	15787.1	8412.26	14824.5	6900.1	7660.83	7860.89	9263.87	7744.44	10928.4	7199.65
A0A0D9QWH4	A0A0D9QWH4	A0A0D9QWH4_CHLSB	SF3B3		71001.4	54812.6	64700.4	69741.9	64646	69698.8	68643	56807.7	75813.1	76183	67333.6	60180	67673.8	67153.5	68546.2	67956.1	54151.8	67847.5	65535.3	56919.5	74698.3	68545.3	69790.4	70987	72710.3	76432.6	80059.8	70946.4	69578.1	70977.3	70974.3	53624.3	74411.5	77338.8	62188.6	78726	70941.4	55620.8	70821.6	73214.6	78027	79933.6	55903.4	65227.9	74096.8
A0A0D9QWI0	A0A0D9QWI0	A0A0D9QWI0_CHLSB	GPAT3		5141.13	7453.63	6010.32	4085.5	6669.9	6557.17	9273.3	6847.48	6836.04	5346.39	4631.06	5649.93	8735.53	9842.94	10397.1	4254.79	8557.82	9653.48	4557.96	5794.79	4675.09	5227.68	5238.55	5439.35	6590.95	3320.58	4908.84	4703.53	5938.04	6332.55	4543.12	8560.34	10571.1	4638.7	4815.27	5019.29	8648.42	9344.84	7316.74	6170.34	4986.96	6386.1	6230.09	6070.45	7830.74
A0A0D9QWI2;A0A0D9R5N3	A0A0D9QWI2;A0A0D9R5N3	A0A0D9QWI2_CHLSB;A0A0D9R5N3_CHLSB	MAP2K3;MAP2K6		8178.82	7331.84	6908.17	8356.38	8429.41	7831.5	6756.22	7938.38	9285.78	7244.15	8886.38	4791.43	7586.78	6977.96	7901.31	9595.9	8963.05	10414.4	8708.55	9923.78	8946.46	6081.28	7965.78	9740.22	7248.26	8168.38	8660.06	8435.06	6572.22	7054.82	8054.9	11081	10843.8	7886.2	8883.2	7709.92	9687.77	10323	7899.44	8284.82	10718.4	8394.82	9556.8	9130.34	8480.95
A0A0D9QWI4	A0A0D9QWI4	A0A0D9QWI4_CHLSB	COG4		10739	7813.18	9757.95	8673.35	9573.15	9876.92	8742.5	6920.2	8592.59	8980.42	8318.84	8278.82	9124.5	9591.1	9070.99	8958.91	9870.67	9096.36	8911.06	7752.89	9041.29	9383.95	9350.75	8323.97	8790.18	9209.87	8215.03	9678.55	8607.71	9832.81	8213.17	7972.37	9164.17	9495.33	8540.47	7977.61	9192.81	7898.19	7737.95	8369.11	6896.37	7130.4	8114.01	10190.8	7305.44
A0A0D9QWI7;A0A0D9REZ8;A0A0D9S9F8;A0A0D9SEF0	A0A0D9QWI7;A0A0D9REZ8;A0A0D9S9F8;A0A0D9SEF0	A0A0D9QWI7_CHLSB;A0A0D9REZ8_CHLSB;A0A0D9S9F8_CHLSB;A0A0D9SEF0_CHLSB			16456.8	2294.1	4685.52		6955.79		17857.1		21817.5	29824.3	4231.59	3409.24	15204.4		14026.3			19144	11832		18325.3	15046.4	9105.09	12455.1	24711.9	14508.4	49370.3	6321.45	8776.81	17889.4	22792.2	5682.22	32351.3	28239.3	8433.62	72208.3	17102	7438.39	68752.8	25510.2	27337.4	101783	19615.1	6646.14	16896.8
A0A0D9QWI7;A0A0D9REZ8;A0A0D9SBE0;A0A0D9SEF0	A0A0D9QWI7;A0A0D9REZ8;A0A0D9SBE0;A0A0D9SEF0	A0A0D9QWI7_CHLSB;A0A0D9REZ8_CHLSB;A0A0D9SBE0_CHLSB;A0A0D9SEF0_CHLSB			245523	157236	187512	214204	183757	185696	256813	179804	204902	220042	185405	188944	231076	203111	237153	234997	234055	236324	233077	173144	217637	224329	196295	214849	261248	203455	211460	238856	201584	229988	267511	211573	264503	252865	207784	182800	252296	205546	222228	265143	163083	187175	263385	219899	250002
A0A0D9QWI7;A0A0D9S9F8;A0A0D9SB67;A0A0D9SEF0	A0A0D9QWI7;A0A0D9S9F8;A0A0D9SB67;A0A0D9SEF0	A0A0D9QWI7_CHLSB;A0A0D9S9F8_CHLSB;A0A0D9SB67_CHLSB;A0A0D9SEF0_CHLSB			11744.7	11047.3	9645.67	13323.6	8593.26	10139.1	9881.88	9662.71	9237.87	9161.02	15249.1	13195.5	10405.3	9607.01	9855.52	11006.6	10214.1	10743	12554.9	12149.6	8353.66	12134.2	11737.7	9739.08	12332.9	12100	10442	11703.6	9565.21	8587.82	10950.8	14137.7	11680.7	10964.5	10114	9755.19	12801.8	12505.1	9643.67	12020.6		8170.19	12189.6	8734.54	9060.99
A0A0D9QWI7;A0A0D9S9F8;A0A0D9SBE0;A0A0D9SEF0	A0A0D9QWI7;A0A0D9S9F8;A0A0D9SBE0;A0A0D9SEF0	A0A0D9QWI7_CHLSB;A0A0D9S9F8_CHLSB;A0A0D9SBE0_CHLSB;A0A0D9SEF0_CHLSB																																			8060.42	7414.55		5007.47	5911.8	4685.45		5123.08			11131	4047.14	7565.54
A0A0D9QWI7;A0A0D9S9F8;A0A0D9SEF0	A0A0D9QWI7;A0A0D9S9F8;A0A0D9SEF0	A0A0D9QWI7_CHLSB;A0A0D9S9F8_CHLSB;A0A0D9SEF0_CHLSB			15468.9	15429.5	18188.8	21369.5	16873.6	13789.6	16691.5	15633.2	11726.7	16600.4	18789.2	16033.1	11876.4	11298.7	10037	18528	16828.1	17001.3	15966.9	17177.4	16041.6	16580.7	16543	15826.6	19171	17522.7	14875.8	13441	14674.7	10648.8	19356.1	21179	16493.6	16734.7	15932.3	15730.7	16420	17230.3	13321.5	18608.3	4375.16	12924.4	18866.1	11554.4	9998.44
A0A0D9QWI7;A0A0D9SBE0;A0A0D9SEF0	A0A0D9QWI7;A0A0D9SBE0;A0A0D9SEF0	A0A0D9QWI7_CHLSB;A0A0D9SBE0_CHLSB;A0A0D9SEF0_CHLSB						1944.74	2858.71		2275.76									3412.99		3404.99	3741.51		3875.94					4289.7	4735.94		2187.85							4304.94				3004.23		2551.94	3168.02		1787.01
A0A0D9QWI9	A0A0D9QWI9	A0A0D9QWI9_CHLSB	KMT2B		2364.54	2800.54	1654.06	1325.19	2022.97		1602.05	2648.26	2031.72	2357.19		1498.66	1673.49	2823.51	1987.42	2300.85	2428.52	2914.56	2690.29	2215.53	2534.81	2505.17	2347.41	2015.8	1952.77	3503.28	2338.58	2267.69	2087.23	2152.31	2787.39	1266.28	2085.78	2232.57	2891.93	2422.06	2888.12	1627.15	3334.48	1821.86		1757.15		1635.96	1709.02
A0A0D9QWJ0	A0A0D9QWJ0	A0A0D9QWJ0_CHLSB	FCSK		5449.08	5149.75	6405.21	6363.26	4852.45	5214.61	5562.8	5208.49	4137.26	4831.14	4355.35	4545.46	5714.75	4738.65	4677.39	7078.15	4783.81	6334.74	5636.79	5247.77	5388.46	4872.04	5654.88	4709.72	4556.54	3904.12	3958.92	4733.79	4412.7	5269.47	6227.34	5950.32	5732.13	5493.43	6574.65	4286.58	4805.21	4925.5	4132.35	5709.88	4189.83	4424.46	5270.08	5103.31	4838.71
A0A0D9QWJ3	A0A0D9QWJ3	A0A0D9QWJ3_CHLSB	DPYSL4		21420.2	17180.8	19808.6	20295.3	20403.1	19967.7	18573.2	17227.3	17737.4	17945.4	20099	18309.9	20738.3	20685.9	19409.5	22157.1	17382.1	19287.5	19889.1	18653.1	19611.1	19739.3	22688.5	22180	18853.4	24195.7	20525.7	21004.5	20952.8	20514.7	20360	16949.7	17771.8	18319.4	18466.6	14647.6	19716.1	18220.1	17497.5	20516.6	14799.8	17062.5	23019.8	20766.2	19978.8
A0A0D9QWJ4	A0A0D9QWJ4	A0A0D9QWJ4_CHLSB	ABRAXAS1		1738.28	1418.04	1505.02	1687.07	1666.81	1367.7	1397.12	1166.56			2012.52	1121.19	1213.15	1204.02		1664.42		1853.42	1546.91	1276.35	1893.16	1303.31	1924.43	1130.35	1505.59			1392.89	1377.54	1517.38	2574.92		1104.24	990.787		1612.31	1238.71	948.128						1804.99
A0A0D9QWJ6	A0A0D9QWJ6	A0A0D9QWJ6_CHLSB	LLPH		28238.3	21651.5	36457.7	39787.4	23346.2	32880.6	30946.8	23146.6	23840.2	23343	39466	29597.5	37985.8	22013.9	32019.6	37373.8	28121.2	47118.8	41474.7	22192	43029.8	26891.7	29133.3	34092.7	24543.8	35582.7	26252.5	36374.7	31315.2	22409.4	37392.3	20716.4	29894.3	30680.9	31221.2	24329.1	25086.5	24339.8	25634.6	32581.2	22174.6	29740.1	45458.8	26122.2	23356.9
A0A0D9QWK1	A0A0D9QWK1	A0A0D9QWK1_CHLSB			33875.3	35801.8	39987.9	34083.8	36248.7	35921.3	33128.2	31431.5	33489.6	28279.9	31603.8	30875	36224.1	40068.2	36808.5	40195.4	52314.1	40161	36683.8	33725.6	33280.9	30865.8	24025.3	30962.1	31665.1	29615.6	30243.9	28093.3	28625.8	31378.9	34318	34321.8	38513.5	32434.6	34238.9	29258.7	34545.5	40757	29423.9	27732.9	19449.9	16260.1	30361.6	31575.2	32578.7
A0A0D9QWK4	A0A0D9QWK4	A0A0D9QWK4_CHLSB	MSRB3		3081.16	2074.63	2809.54	2389.82	2688.81	2372.08	1820.29	2630.29	2295.27	1288.71	1859.21	1975.39	1673.15	2927.79	2541.39	3213.4	2271.36	1793.5	1772.32	2040.25	1526.45	2173.22	1961.4	2216.56	2032.98	2218.55	1680.44	2420.25	1840.27	2100.96	1951.25	2602.44	2345.28	2025.96	2932.16	1647.64	1665.53	2092.55	1766.41	1830.98		635.744	1826.15	1756.01	2209.46
A0A0D9QWK5	A0A0D9QWK5	A0A0D9QWK5_CHLSB	PPP2R2D		6483.2	4007.65	9031.79	8776.12	9286.72	8776.12	9184.33	5517.98	8530.08	7261.11	10000.5	8521.64	11317.6	10488.8	9325.21	7603.7	7629.94	6581.85	10006.5	7158.92	8254.02	8554.6	11673.9	10470.4	8069.75	10349.6	7220.63	9722.95	9819.2	11615.2	7260.67	6020.12	7475.73	9431.43	8364	4280.99	9668.34	8452.74	7498.35	10641.4	4244.49	6262.88	7217.29	9784.64	10000.9
A0A0D9QWK7	A0A0D9QWK7	A0A0D9QWK7_CHLSB	LEMD3		5856.61	6630.6	5315.08	4053.48	5944.41	6515.89	9478.41	5214.75	5509.78	4474.13		4302.11	7646.19	9151.88	10156.9	5358.72	11959.8	11321.3	6087.18	6258.74	5911.14	5003.5	2943.05	5452.09	6546.55	3053.61	6192.23	4189.1	4699.89	4191.3	6018.09	8387.81	13067.8	5864.15	5764.67	4123.52	10391.3	9704.13	4224.62	5593.24	1945.97	4029.24	5332.93	5055.95	7367.08
A0A0D9QWK8;A0A0D9R5H7	A0A0D9QWK8;A0A0D9R5H7	A0A0D9QWK8_CHLSB;A0A0D9R5H7_CHLSB	PPFIBP1;PPFIBP2		10188			5407.77	4756.65	5524.38	7843.45		8998.28	7522.58						7007.98		6368.47	3955.66		6466.5		5025.57		7457.18		10054.6				5912.34		8200.48			6143.36			7501.46		10790.9	9370.57	8362.7		7351.96
A0A0D9QWL5	A0A0D9QWL5	A0A0D9QWL5_CHLSB	COG1		31754.6	32995.8	33713.8	32332.5	34706.3	35913.4	31727.2	28347.8	29707.6	31429	32798	32937.5	34118.8	36542.3	39757.7	38225.1	35808.6	34618.4	35833.3	31099.9	37198.6	35606	34227.4	36573.4	32179	32594.7	25749.3	36243.7	37685.3	36672.8	35880.2	30593.2	32080.2	34239.7	31311.1	28616.2	33463.3	33795	27281.4	33859.5	24124.4	28142.2	33259.6	35022.6	36543.2
A0A0D9QWM0	A0A0D9QWM0	A0A0D9QWM0_CHLSB	GLRX3		76779.7	53805.6	66257.3	69147.5	63612.1	71099.9	75590.4	52490.6	75020.3	72926.3	62932.4	62507.1	70321.9	56033.1	67706.3	64631.4	63070.4	68241.6	70092.4	60087.3	70575.7	71468.1	66935.8	68714.2	69165.6	67072.9	75694.4	65122.9	67817.7	73326.2	66092.2	56327.5	64458	72066	60358.1	75158.9	66943.5	58449.7	76025.2	75310.5	93440.6	68768.2	66778.5	61021.2	69223.6
A0A0D9QWM1	A0A0D9QWM1	A0A0D9QWM1_CHLSB	RBM42		17228.2	9210.26	14708.9	13517.2	13572	16370.2	16965	7830.37	20455.9	15711.7	7717.99	10842.3	10846.4	9248.36	13062.2	14282.5	11829.2	19703.9	14855.2	7536.33	21638.2	16769.2	9992.89	12551.5	15316.5	12676.3	16845.5	10068.6	10115.5	13892.5	15373.1	7633.4	22059.3	13754.8	9067.68	23408.8	12663	7035.85	17033.4	13777.9	11615.4	17717.3	18435.1	8111.99	15738.5
A0A0D9QWM3	A0A0D9QWM3	A0A0D9QWM3_CHLSB	C17orf80		3774.83	4004.4	3778.78	2430.53	4766.32	4305.06	4685.34	2593.94	2955.27	1897.3	3087.4	2550.43	3651.2	4649.36	4495.51	3539.19	6517.77	5672.04	4739.66	3811.53	3065.21	3606.38	2696.52	3066.4	4101.01	2799.75	2629.99	2053	2377.76	2609.2	2987.77	3324.4	5543.94	3438.34	4010.72	2919.33	3775.74	3615.3	3268.97	2726.91		2851.52	2499.41	2955.47	3436.8
A0A0D9QWM4	A0A0D9QWM4	A0A0D9QWM4_CHLSB	GNS		23104.5	13604.1	16265.8	12499.9	14673.3	15256.3	13753	10376.2	16939.7	14220.4	12735.5	8721.24	11669.5	9282.81	9977.68	12801.8	16723.9	19826.1	13360	15981.4	14857.1	12990.2	10948.4	13672.1	12785.5	10554.7	14492.1	12189	9390.19	11434.5	15514.5	18014.5	15297.1	12762.1	11185.9	18347	11980	12094	15814	12639.7	20696.2	17741	14353.7	9584.95	12045.2
A0A0D9QWM7	A0A0D9QWM7	A0A0D9QWM7_CHLSB	EIF3F		63886.6	47813.4	70166.9	57304.7	53672.9	62568.2	62513.5	49612.4	65818.4	72498	66142.4	50584.1	48252.5	57739.6	58523.4	69521.1	51960.9	72942.9	72425.1	58840	71794	68240.7	60126.4	64924.8	66475.6	73383.5	76605.9	57907.3	60131.5	65405	73983.2	65065.2	70190.3	70471.9	62246.8	65206.1	57380	53656	67113.4	69065.2	76636.2	67145.6	65038.7	56241.7	61585.7
A0A0D9QWM9	A0A0D9QWM9	A0A0D9QWM9_CHLSB	HAUS5		3795.99	3404.04	3812.04	3099.56	3737.73	3568.65	4146.29	5996.78	4297.92	4574.34	3874.49	4483.42	3745.03	3992.49	4344.46	3012.72	3817.12	4822.11	4063.6	4035.76	3730.43	5152.48	5334.7	3627.7	3659.79	2510.09	3937.5	5217.01	3413.57	4179.91	3909.05	4413.82	3550.26	3429.1	4554.6	4218.98	3886.76	4730.33	4224.56	4573.76	4892.04	4940.29	4161.36	4095.8	4463.16
A0A0D9QWN3	A0A0D9QWN3	A0A0D9QWN3_CHLSB	COPS4		36168.3	31645.8	32183.7	34131.5	32497.6	31601.2	33766.1	28730.9	37335.9	34268.2	34554.5	34421.1	34841.5	31716.8	34781.8	35739.2	30529.9	32413.1	33784.5	30338.2	36812.2	32044.4	34613.8	37529.2	32756.2	38726	36705.3	36386.9	31146.6	35016.2	30972.3	26419.7	31590.4	35261	29553.6	31249.1	30997	29219.2	31557.1	31817.8	25972	29909.8	34664	31611.3	34041.4
A0A0D9QWN4	A0A0D9QWN4	A0A0D9QWN4_CHLSB	MGMT		13101	9844.48	14128.4	13195.2	10026.1	11018.8	10409.9	9718	11032	10381.1	10040.8	10462.8	10868.7	11838.4	10387.9	18234.9	12670.2	14093.2	14271.7	11074.3	13216.3	13723.3	12479	13372.3	12845	12276.5	8847.91	12380.5	9342.34	10735	14410.4	9226.21	13491.7	12919.4	9736.51	13698.5	10915.7	8586.22	9499.14	8983.49	18241.7	12590.8	12121.7	9646.54	11143.9
A0A0D9QWN7	A0A0D9QWN7	A0A0D9QWN7_CHLSB	LIN54		2277.91	1588.84	2401.79	2550.66	2271.14	2032.48	2545.01	1560.82	2517.78	1790.13	2244.12	2157.78	2557.47	2090.02	2099.9	2038.75	2294.58	2508.18	3058.04	1791	2413.95	2575.41	2010.04	2389.31	2223.99	1849.8	1993.59	2357.15	2069.24	2318.61	2990.07	1709.84	1946.94	2567.78	2292.12	2191.39	2163.93	1759.31	2376	2628.88	1557.91	2108.84	3332.1	2319.7	1850.89
A0A0D9QWP0	A0A0D9QWP0	A0A0D9QWP0_CHLSB	TBK1			1445.88	1452.73	1802.94	1669.65	1141.09	1685.23	1616.09	711.813	1178.11	1022.67	1124.42	1687.82	1863.36	1209.2	1572.61	1268.96	877.761	1646.44	1505.06	1256.23	1152.2	1581.08	1683.71	1381.7	1322.33	1082.14	1606.67	1821.12	1768.56	996.702	1348.87	1300.7	1214.47	1085.04	684.588	1863.23	1568.22	1160.77	1488.29			1440.84	1404.22	1518.71
A0A0D9QWP1	A0A0D9QWP1	A0A0D9QWP1_CHLSB	MKI67		13808.9	16353	15579.4	13911.9	22807.1	20314.7	20739.9	15191.3	15678.5	9340	11669.7	13226.4	16574.3	24455.7	24120.3	15523.4	32731	28288.6	15601.5	20116.2	14522.5	14063.1	13178.2	14367.4	16164	14601.8	14036.1	11625.7	13775.5	16234.2	13724.9	26281.6	29234.4	14100.5	19640.7	14687.3	23119.9	37354.5	17645.4	11652.5	20980.7	10538.8	11393.3	13786.5	16992.3
A0A0D9QWP5	A0A0D9QWP5	A0A0D9QWP5_CHLSB	XPOT		10874	7883.68	10893	10761.2	11621.3	11007.7	11629.6	9256	10424.8	11779	10759.8	9690.5	9759.14	10958.3	10519.9	9356.14	9353.05	9114.83	9019.9	8409.84	10638.1	10165	10318.5	10745.5	11986.1	10388.7	11961.9	12199.9	11992.5	12664.2	10413.2	9073.85	10616.3	10007.3	9980.35	11283.3	11075	10196.6	11202.8	11275.8	11634.3	12281.5	9091.06	11604.9	11198.3
A0A0D9QWP9	A0A0D9QWP9	A0A0D9QWP9_CHLSB			95134.9	28795.4	74413.2	65248.8	45520	56015	77832.6	41588.9	85828.1	97350.2	81843.1	52456.2	48296.8	68367.9	67308.9	86518.5	71812.8	73735.7	101178	95007.3	76554.9	85677.4	83298.1	82328.4	79990	48240.6	113321	52290.5	57062.1	68030.7	76001	61093.2	82435.8	73119.1	85055.7	126128	75066.2	103006	120600	72192.3	69726.4	102416	56814.3	63433	80322
A0A0D9QWP9;A0A0D9SD24	A0A0D9QWP9;A0A0D9SD24	A0A0D9QWP9_CHLSB;A0A0D9SD24_CHLSB			74205.5	83851.2	71902.8	84758.8	62704.1	86855.6	82099.5	45387.9	78429.2	71135.5	60228.4	57230.4	51600	49719.8	61242.6	70849	109150	88719.2	79123.1	130043	82349.9	78508.3	69302	70418.4	83075.5	78728.1	88297.9	48081	53635.8	49669.2	65919.2	131712	89945.2	59052.3	92985.4	95626.6	55087.1	80853.3	76428.9	72032.9	78250.8	100472	83302.3	69866.9	73739.6
A0A0D9QWQ0	A0A0D9QWQ0	A0A0D9QWQ0_CHLSB	SEC31A		36689.7	38779.9	38372.1	37365.2	35721.4	34997.4	38023	30881.5	41214.1	40185.2	37297.9	36858.1	34478.4	36355	34033.6	38801.1	34347.8	38021.5	38251.9	37949.3	37814.4	36430.2	34749.4	38657.2	38882.2	35733.1	39211.8	35458.7	37325	39575.1	41077.4	38946.2	40975.8	37792.1	35796.8	42033.6	36199.2	36178.6	41109.8	38169.7	37604.3	40492.3	37556.3	40070	38621.3
A0A0D9QWQ2	A0A0D9QWQ2	A0A0D9QWQ2_CHLSB	DENND2B		7337.93	4112.07	5203.55	5546.22	4716.2	5653.42	7157.31	3701.88	4850.6	4347.28	3296.69	4460.18	5303.32	4992.49	4935.66	6564.09	4649.02	4829.42	7162.47	5629.95	4831.3	6373.76	5272.87	5271.05	6687.54	6062.68	3998.78	4873	4959.29	4301.48	6272.82	4515.5	5837.24	5442.97	4116.81	4665.66	5869.47	3805.83	5668.51	5239.71	3354.28	4704.72	4153.09	4135.39	3782.58
A0A0D9QWQ9	A0A0D9QWQ9	A0A0D9QWQ9_CHLSB	ENOPH1		39838.6	25044.4	38388.9	37524.5	42189	42657.6	47426.3	28471.8	49108.3	49672.3	34787.6	40366.4	49189.8	39227.8	49546.7	40728.3	35118.1	40548.2	44988.3	24971	48151.3	48943.6	42850.6	41502.1	44676	49465.4	40116	44887.6	42353	51860.5	39106.4	22028.2	41021.4	43770.7	38141.2	41776.2	45430.7	36747.3	40741.9	51075.4	30565.1	43354.2	37346	41129	45941.7
A0A0D9QWR2	A0A0D9QWR2	A0A0D9QWR2_CHLSB	DDX19A		21475.7	13526.3	16305.8	20741.8	20472.5	18576.2	24349.4	18221.4	20438.1	17776.3	14557.6	11839.4	18012	15791.3	20333.4	16281.5	21373.3	18632.2	18511.3	20354.4	21922.5	22628.5	18259.4	25200.4	18334.6	17594.6	26854.7	18783.7	23243	17271.9	23578.7	17246.2	18949.5	16287.7	21926.4	47549.6	16353.3	17599.2	25487.6	20542.5	47774.2	46721.5	23509.2	15579.3	22316
A0A0D9QWR2;A0A0D9QWR9	A0A0D9QWR2;A0A0D9QWR9	A0A0D9QWR2_CHLSB;A0A0D9QWR9_CHLSB	DDX19A;DDX19B		30850.7	19111.3	26649	27542.4	22325.5	25762.5	27896.2	22379.6	29563.9	32308.5	22639.2	24039.2	23731.4	20755	25801.2	27426.8	21121.4	26582.2	25750.3	23754.5	29792.1	26304.3	23806.9	24392.5	28724.2	26491.6	31621.4	26826.3	24933.1	24605.7	27158.4	23168.5	28941.5	28313.6	24188.4	37717.6	24138.4	17235.2	32700.2	29954.9	51074.7	38243.7	35934.4	23971.4	28592.6
A0A0D9QWR2;A0A0D9S4G9	A0A0D9QWR2;A0A0D9S4G9	A0A0D9QWR2_CHLSB;A0A0D9S4G9_CHLSB	DDX19A;DDX25		31269.6		4931.28	8339.25	6326.46	11230.9	30047.1		15180.7	30184.2	5506.13	5364.67	13167.3	3849.43	13131.9	15214.3	4500.22	17203.2	16883.1	3939.57	24071.4	18547.5	7109.04	13550.8	39646.9	20815.3	33753.1	23350.6	16199.3	12842.8	30026.7	2751.55	19179	13716.2	2180.31	12468.9	15396	2942.97	24004.5	31059.2	20710	31659.7	40394	6169.6	18167.3
A0A0D9QWR3	A0A0D9QWR3	A0A0D9QWR3_CHLSB	HNRNPDL		90213.7	55713.5	81238.8	82075.5	84730.2	86663.9	88580.3	57566.6	84749.3	90082.1	89980.4	87876.5	93804.6	89321.4	101443	85979.5	72181	79126.2	87829.3	70893	87409.5	80969.1	83160.3	89350.9	91333.7	105480	100353	89595.7	91016.6	96371.2	75156.1	64125.4	79698.3	86063.6	82589.5	91024	83056.4	70409.3	88459.1	92559.5	60931.7	79421.8	121069	101765	106218
A0A0D9QWR4	A0A0D9QWR4	A0A0D9QWR4_CHLSB	HNRNPD		325644	274601	312233	313855	281950	302464	287013	248081	285807	289362	319449	284151	290764	264711	314631	354661	274110	342093	342360	282444	341727	326149	293113	322271	298507	361286	328061	318095	302947	312247	335400	268351	321407	341767	297336	262666	314450	245579	285020	345052	235752	267135	373535	319697	335194
A0A0D9QWR4;A0A0D9QWR3	A0A0D9QWR4;A0A0D9QWR3	A0A0D9QWR3_CHLSB;A0A0D9QWR4_CHLSB	HNRNPD;HNRNPDL		4689.73		1103.89		891.823	1768.46	3533.03		3580.53	2375.69			2121.28	1216.99	2457.61	2708.8	1076.29	3362.76	3327.04		2594.7	3893.19	1373.91	2616.04	15196.7	5663.52	13423.2	9850.6	4366.15	5000.99	25904.2	1153.51	25926.4	17832.1	2137.37	51349.5	21515	2712.97	68311.2	38843.9	67276.1	211681	79744.2	4787.58	33867.2
A0A0D9QWR5	A0A0D9QWR5	A0A0D9QWR5_CHLSB	DOCK1		4639.85	2422.94	3101.94	4100.14	3488.49	2940.26	4124.87	2035.12	3817.53	4044.06	2983.57	2868.06	4095.74	2607.9	4309.51	3839.53	2766.03	3227.9	3920.47	2383.38	3971.82	3988.31	2870.57	3507.77	4916.05	2852.11	4216.78	3647.34	3487.01	3800.05	4194.72	1885.79	3720.04	4228.99	2621.38	3916.08	4415.05	2968.78	3269.9	4278.84	4780.94	4165.06	2774.9	2793.87	3233.62
A0A0D9QWR9	A0A0D9QWR9	A0A0D9QWR9_CHLSB	DDX19B		18125.9	10262.3	14606.5	11792.7	13006.6	14212.6	18247.4	9619.81	21562.7	19697	11829.4	11697.4	17482.1	8507.71	17274	19546.9	11493.5	16858.1	10714.6	9664.66	17438.7	13012.5	10376.9	15432	16163.4	10963.9	16688.5	14893.1	13760.7	17402.6	16166.1	12406.2	19026.4	15588.4	10320	27453.6	13769	8718.05	19202.7	15160.3	13472.3	17259.2	23047.6	13454.2	18358.2
A0A0D9QWS4	A0A0D9QWS4	A0A0D9QWS4_CHLSB	AARS		77169.6	62295.2	76921.5	70815.2	70206.2	67448.4	61519.1	63566.6	69084.4	72092.2	71244.9	66711.5	67166.6	66841.1	69424.9	73422.6	68697	72461.9	66697.5	63273.8	69226.8	61084.6	71033.7	68089.4	64564	75891.9	77235	70786.2	68099.3	70657.9	75180.6	62560.5	72002.2	69690.3	70290.2	67278.5	63206.8	64058.3	65549	65887.5	70048	59973.4	60135.1	70618	66254.6
A0A0D9QWT3	A0A0D9QWT3	A0A0D9QWT3_CHLSB	IPO7		45831.5	55518.6	54669.8	60438.4	65892.3	61689.1	57596.6	64870.9	59732.3	65424.8	61304.9	66077.4	61988.6	66162.3	63987.7	52237.6	57812.8	53044.2	57869.2	59294	56337.5	65737.7	62730.7	62913.7	62685.6	69550.9	54332.5	62988.9	74617	67305	55365	54461.2	48351.7	60491.5	65444.6	49798.9	65452.1	67967.6	49823.7	65260.2	47898.3	44712.8	40635.7	70899	67672
A0A0D9QWT3;A0A0D9R533	A0A0D9QWT3;A0A0D9R533	A0A0D9QWT3_CHLSB;A0A0D9R533_CHLSB	IPO7;IPO8										4209.57	2896											2270.96			1542.67	2593.01		6167.68						2890.22	2126.05		5488.2			4450.02		9753.96	11073.6
A0A0D9QWT4	A0A0D9QWT4	A0A0D9QWT4_CHLSB	ANTXR2		1307.06				617.599	1492.31	1950.81					1333				2068.34	3021.19	3027.15	4955.84		1590.62			946.685	3371.59	2968.13	3034.03		1948.06		2676.27	3051.88	1690.03	3463.17			818.022	3000.69		3013.14		4477.77	1779.18		1025.78
A0A0D9QWT5	A0A0D9QWT5	A0A0D9QWT5_CHLSB	PDPR		27398.2	24287.6	19179.5	20438.4	23961.6	23849.5	19260.4	22190	18920.5	17437.6	21960.2	20198.1	22848.8	22788	20205.6	18904.8	23183.3	20474.7	19193.6	23264.4	20876.9	23620.2	23558.2	20378.6	20994.3	16244.1	14677.4	19148.9	21270.6	18344.6	25698.5	24499.3	18209.3	21851.4	30893.4	19404.9	19324.3	24835.4	17193.3	20640.3	9718.64	15045.3	11866.2	22883.1	19860.1
A0A0D9QWT7	A0A0D9QWT7	A0A0D9QWT7_CHLSB	DHX32		5248.12	5056.88	5145.73	7558.08	6162.13	6547.1	6208.11	6541.65	5408.56	5159.81	5082.98	6816.74	5231.95	4687.66	5128.02	5630.62	6326.87	6071.13	6360.81	6456.49	5064.54	5430.03	4624.51	5939.37	6160.04	4184.46	5632.53	5086.9	6972.09	5218.64	3669.23	7740.81	5195.49	6516.99	7569.55	4061.82	7756.99	8194.52	4402.31	8572.54	1688.77	4198.12	2916.83	3247.31	4641.96
A0A0D9QWT8	A0A0D9QWT8	A0A0D9QWT8_CHLSB	BMP2K		9562.65	9657.36	11276.8	9392.26	10959.4	10199.2	11538	10475.7	10774.2	9087.49	8893.4	11946.1	10829.3	10429.3	9912.39	12322.6	10832.7	9045.93	11871.9	11333.1	10765.8	10761.1	11015.3	12346.4	10275.4	10592	7887.68	8597.71	11043.3	9030.49	8705.16	8811.61	10391.6	10716.5	8774.87	9347.26	10603.8	10427	8002.8	9618.08	9893.42	10744.3	12464.8	11100.9	10021
A0A0D9QWT8;A0A0D9RR64	A0A0D9QWT8;A0A0D9RR64	A0A0D9QWT8_CHLSB;A0A0D9RR64_CHLSB	AAK1;BMP2K		8455.34	4363.63	5688.5	7593.41	4673.98	6342.39	8665.51	3583.61	6105.01	8084.82	5410.13	5231.26	8116.5	5650.83	8308.14	7529.78	6231.85	5977.55	8482.25	5306.17	6183.84	5955.14	5391.45	6963.41	11585.8	9611.43	10047	8410.2	7785.13	8011.56	4847.32		6170.57	8510.05	4573.52	4778.66	8570.78	5600.63	7866.26	10824.8	7797.69	9290.48	7521.06	6928.81	7538.49
A0A0D9QWT9	A0A0D9QWT9	A0A0D9QWT9_CHLSB			23823.7	16184.3	19846.7	23205.8	19373	19551.5	23751.8	15432.6	19392.9	21021.9	16534.7	16653.3	18893.4	13914.4	16775.4	20235.4	15704.4	18314.9	22154.5	16345.1	22288.4	21504.4	20484.6	19701.7	20724.1	17005	17668	19674.2	17639.8	16919.1	21633.5	13947.1	22366.7	22347.1	18047.3	23536.3	18635.3	16272.5	18013.6	18337.7	13445.5	19062.5	15548.6	14881.3	16969.6
A0A0D9QWU1	A0A0D9QWU1	A0A0D9QWU1_CHLSB	UROS		4106.58	4070.2	4373.34	3395.51	4956.83	3819.37	3418.97	5629.72	3823.33	3714.42	3936.7	5206.28	3957.19	4118.07	4003.54	4332.35	4165.82	4461.1	3867.46	4813.97	3520.05	4030.94	4562.73	4283.91	3988.45	4738.33	3793.39	4585.04	5142.81	4045.94	3294.55	3980.42	4376.25	4163.43	4698.51	3693.09	3792.54	4141.64	4338.86	4189.78	2147.71	2900.36	4203.31	4387.57	4386.63
A0A0D9QWU6	A0A0D9QWU6	A0A0D9QWU6_CHLSB	SRGAP1		3970.2	5279.31	3923.78	4345.15	4809.6	3948.77	4162.28	5549.73	2922.66	3242.5	3816.03	6134.22	3464.3	4636.39	2719.97	3456.44	3848.31	3505.01	4471.12	4567.05	3584.85	3641.25	3115.57	3269.05	3149.43	5203.19	2900.45	2638.97	5257.2	3815.11	2674.86	5691.85	3430.82	3754.81	5731.51	2286.45	3785.67	4156.51	4635.21	2784.31		1589.39	2519.01	3298.92	4103.93
A0A0D9QWU7	A0A0D9QWU7	A0A0D9QWU7_CHLSB	EDRF1		4048.58		2448.44	2219.26		2950.78	4720.61	3589.93	2357.81	3219.08	2390.54	2690.99	2372.41	2091.68	2448.78	2587.4	4067.55	2864	3312.92	2147.92	3877.77	3595.22	1731.76	1919.61	5321.9	2642.91	3291.11	2920.84	3105.84	2681.29	4606.63	3805.64	3993.13	3914.41	2041.39	2439.06	4985.31	2751.99	3635.69	5154.6	5857.62	4495.57	3817.84	2107.08	3073.47
A0A0D9QWV0	A0A0D9QWV0	A0A0D9QWV0_CHLSB	ANXA3		39747.6	37975.4	40148.8	37907.5	40688.5	43394.4	37304.7	34881.4	41043.6	41851.9	40886.5	44515	40524.8	36097.7	39679.4	33900.4	36930.6	39150.7	47111.5	37843.7	46066.3	36675.1	31559.9	35026.6	40216.9	49041.7	42989	40930.8	38185.3	42438.1	36965.4	43191.7	41009	52245.6	41109.2	54311.4	48069.2	37178.2	41316.8	42567	41014.8	43562.5	34248.6	38522.4	40855.6
A0A0D9QWV1	A0A0D9QWV1	A0A0D9QWV1_CHLSB			9404.05	2244.04	5893.81	5475.35	6491.34	6474.25	9893.38	4806.32	11207.9	12289.8	4185.08	5674.75	10354.2	6087.1	9131.35	5781.14	5028.53	7762.07	5890.79	3721.59	7838.65	7152.73	6441.42	6674.31	9571.97	5690.78	11854.1	7415.03	5386.26	8799.57	7512.35	2361.36	9209.53	7529.98	4491.4	15416.9	7317.1	4675.93	11840	7582.37	9935.37	13707.6	9032.07	5189.67	9287.04
A0A0D9QWW1	A0A0D9QWW1	A0A0D9QWW1_CHLSB	PPM1H		8088.3				8792.57	8382.81	9361.33		6562.66	9817.32	10496.3	9615.73	12011.7	12712.2	9912.27	3498.82	8959.11	6366	9351.44		8049.14	11637.2		10137	6240.49	6491.76	22984.9		8812.33	7472.15		8046.97	6429.72	6555.77		9863.96	8973.33	7988.97	8690.61	4534.03	27771.5	23630.1	10169.9		8626.86
A0A0D9QWW3	A0A0D9QWW3	A0A0D9QWW3_CHLSB	ABRAXAS2		7633.85	7581.03	6221.07	7139.98	6462.31	6920.82	8502.4	6747.11	8100.61	7781.84	5506.14	7312.34	8196.04	7451.65	7602.86	7960.21	8485.98	7891.91	7857.26	8034.9	8033.83	8048.04	8033.33	8138.81	8939.5	7139.27	6869.59	8748.96	7495.47	7498.51	8384.34	9134.04	8754.48	7865.38	6380.21	7119.79	7866.31	6978.21	7194.92	8511.94	4160.31	5708.8	7773.23	6802.78	8651.91
A0A0D9QWW5	A0A0D9QWW5	A0A0D9QWW5_CHLSB	EEF1AKMT2		11846.7	10080.5	10762.4	10757.1	11494.8	13393.7	12961.4	6294.29	16345.7	14844.3	13441.2	13934.6	11111.9	11082.5	12179.8	9882.94	6900.25	12293.2	10614.1	11013.6	11564.4	11927.3	12447.4	12854.9	15758.8	9817.79	16739.4	12859.3	10789.5	11821.9	10992.9	5609.96	13767.2	12417.5	11656.6	12957.7	11332.9	10801.6	14666.1	12129.9	16846.4	15942.3	11464.4	11859	12549.5
A0A0D9QWW6	A0A0D9QWW6	A0A0D9QWW6_CHLSB	ZNF143		5281.42	16343.7	5743.07	3285.68	15308.2	4217.44	16141.6	6487.78	6529.45	19264.2	5129.96	22516.3	20567.5	15705	7915.27	19195.7	18541.3	22637.9	20073.8	15964.7	19342.3	5382.93	19037.3	19678.7	17564.6	22685.9	10289.8	4239.81	19619.4	3531.16	10892.7	20378.7	15183.5	10491.1	5273.65	7900.62	3890.92	12343.3	13332.5	3206.28	14517.4	12918.1	21104.5	16147.8	21030
A0A0D9QWW9	A0A0D9QWW9	A0A0D9QWW9_CHLSB	LSR		7376.4	6070.67	6230.58	7939.83	5535.83	5817.74	8287.3	3103.85	5747.21	6636.92	4277.63	5277.32	7166.49	6422.66	7091.16	6831.44	9447.57	8559.15	7921.54	5711.36	6024.18	5551.57	5190.22	5855.8	8878.94	6753.56	7626.12	3335.78	6056.52	4960.52	7322.78	7780.62	11311	6471.43	5122.52	7622.41	7800.05	7073.88	6395.35	7063.95	8525.46	6949.44	7006.89	4551.46	7961.75
A0A0D9QWX1	A0A0D9QWX1	A0A0D9QWX1_CHLSB	MON2		9103.27	6631.53	8144.83	7668.98	8419.81	8623.11	10946.7	6097.17	8704.98	8919.48	6723.93	7222.97	7901.74	7309.52	8887.03	7297.19	7686.56	8616.64	8278.17	7844.97	7793.77	9545.37	6351.79	7262.76	10360.3	7178.66	9285.18	7499.54	8834.03	7664.7	9064.71	4810.53	8293.82	8537.86	5647.01	7864.27	7727.75	6916.06	9777.25	11105	10819.7	9899.19	4756.46	7315.21	8132.36
A0A0D9QWX3	A0A0D9QWX3	A0A0D9QWX3_CHLSB	LHPP		6587.07	6570.43	6319.16	5890.78	5823.39	5785.13	5009.94	5566.67	4836.19	4000.57	5661.64	6953.17	5042.11	4350.71	4703.7	5740.21	6476.83	7158.57	5303.5	6478.93	6014.22	4378.13	5672.14	4565.16	3638.37	5473.15	5638.18	6105.32	5980.5	3726.84	7121.71	7940.51	5496.88	5694.82	6487	3534.19	4491.94	7217.95	4170.21	5892.01		5599.58	6860.53	5202.96	4884.54
A0A0D9QWX7	A0A0D9QWX7	A0A0D9QWX7_CHLSB	OAT		38756.6	40004.9	43015.9	40208.5	45191.5	44625.9	33032.6	31532.8	32490.4	25787.3	24485	24670.1	23723.9	23319.5	23592.1	38806.3	46143.6	41155	45216.9	44112.1	44266.1	41981.1	31904.1	34054	28323.7	24214.2	22220.7	26245.1	24246	22641.2	43821	42691	42756.9	43002.4	48321.6	40003.7	39801.2	33559.1	31685.4	29526.5	21763.2	25293.3	19745.7	24444.5	23062.8
A0A0D9QWX9	A0A0D9QWX9	A0A0D9QWX9_CHLSB	GLG1		8704.04	9403.68	8623.62	6532.15	8098.94	7508.65	8907.16	7736.69	8621.74	7079.93	5843.14	5596.73	5814.57	5761.75	6890.47	9163.44	8603.18	10173.6	6501.56	9147.25	9025.29	7769	8463.04	8381.64	9525.68	7592.35	7901.35	6096.98	6806.05	6938.76	9451.38	9861.97	9950.62	6427.94	7774.34	6841.31	9658.63	10640.9	8979.36	8765.78	8754.45	9852.12	5899.19	5912.95	7859.1
A0A0D9QWY1	A0A0D9QWY1	A0A0D9QWY1_CHLSB	USP15		19668.4	17084	18872.5	19411.4	19312.4	20017.3	18875.7	20530.6	20925	20234.8	21162.9	22176.7	21526.7	19121.3	19021.5	19147.4	17849.3	19003	18922.1	17690.1	19466.8	19382.2	22327.4	21360	19957.9	20203.7	20795.7	21599	22033	21803.5	18656.3	17263.2	18740	20441	20283.9	17293.1	21468.9	21234.5	21215.8	20915.5	17711.8	21010	19108.1	21528.1	20613.7
A0A0D9QWY1;A0A0D9RRF0	A0A0D9QWY1;A0A0D9RRF0	A0A0D9QWY1_CHLSB;A0A0D9RRF0_CHLSB	USP15;USP4		3738.75				3983.11	3657.81	10348.1		11249.7	10600.7	2961.49		4925.62		7938.17	5186.73		7921.61	3445.48	1795.01	10121.1	5595.66	4060.9	5988.86	11145.3	8767.34	15049.7	3935.93	6547.81	8653.17	6975.76		7961.56	8325.67	2526.71	13833.9	5474.93		11297.2	8513.32		12356.6	8158.05	3106.27	8063.31
A0A0D9QWY1;A0A0D9RRF0;A0A0D9RMH3	A0A0D9QWY1;A0A0D9RRF0;A0A0D9RMH3	A0A0D9QWY1_CHLSB;A0A0D9RMH3_CHLSB;A0A0D9RRF0_CHLSB	USP11;USP15;USP4										3952.59	4616.9																	8773.7												4768.93			6120.79
A0A0D9QWY2	A0A0D9QWY2	A0A0D9QWY2_CHLSB	SWAP70		15150.1	13440.7	13802.1	13201.2	13035.3	13498.7	14587	13316.2	14673.8	15691.5	14766.7	14071.9	14154.1	12833.6	15312	15309	13041.2	13169.1	14993.8	13981.5	13793.4	13893.3	14747.8	14261.6	15012.2	15324.6	13497.1	15265.7	13188.7	14029.9	16281.2	11587	12785.5	13705	12664.4	14519.6	14269.4	10809.1	14573.5	14888.8	13394.8	13575.6	13807.9	12697.2	14103.7
A0A0D9QWZ1	A0A0D9QWZ1	A0A0D9QWZ1_CHLSB	BUB3		96419.7	71525.7	81476.9	84812.6	86639	91347.5	84972.4	63394.9	90055.3	90756.2	73192.8	73572.6	83588.7	64658.9	80206.7	98197.1	73505.6	86403.2	90669	80506.6	98971	84492.5	81574.8	84549.5	86614.5	101582	92007.7	84582.9	84136.4	88644.9	100248	75077.1	93001.1	96197	80860.2	89122.6	81586.3	70111.9	85199.1	96291.5	70512.4	82560.6	75990	78016.5	91927.5
A0A0D9QWZ4	A0A0D9QWZ4	A0A0D9QWZ4_CHLSB	MLKL		28618.6	24620	30354.4	28548	30338.7	30685.4	26718	25709.8	28653.9	27652.1	29573.1	27198	25293.9	27299.9	26353	24134.2	25540.8	27972.8	28022.3	27397.9	28218.4	27682.7	27652.4	30336.6	29910.8	27443.5	25303.9	28111.6	33120.1	27903	33611.1	26997.4	25725.9	28015.9	28328	25157.7	27257.7	25814	20444.9	24868.4	13623.5	16086.1	21114.7	26764.6	27237.8
A0A0D9QWZ8	A0A0D9QWZ8	A0A0D9QWZ8_CHLSB	GPRC5C		2162.42	3019.55	2965.61	2588.77	3344.72	3235.85	2801.56	3748.75	3411.68	2709.46	3932.51	3923.17	3470	3835.12	3599.57	3075.28	4376.46	3916.67	3106.49	3242.62	2303.81	2988.77	4368.93	2688.01	2400.98	3991.32	3180.43	2787.66	3440.29	2530.3	2431.8	4048.1	2683.65	1996.37	2994.18	1951.11	3276.51	5408.62	2684.23	2299.65	1258.29	2678.87	2745.6	3190.47	3844.48
A0A0D9QX02	A0A0D9QX02	A0A0D9QX02_CHLSB	ACADSB		9733.62	7408.8	7851.05	6922.77	7565.1	8151.19	7474.89	6511.97	7900.32	8102.44	6137.58	6296.14	8479.17	6131.78	7269.74	8695.32	7239.21	8639.24	7646.05	6969.93	8727.83	7761.21	6351.29	7215.69	7519.82	6829.14	6594.99	7359.29	6676.56	7999.6	8133.02	7062.13	9159	9632.76	7256.28	10488.3	7820.04	6823.53	8564.61	7562.73	5782.91	8420.91	7621.95	6915.96	7659.58
A0A0D9QX21	A0A0D9QX21	A0A0D9QX21_CHLSB			48877.2	47056.9	49528.4	52278.7	55753.8	53394.7	44420.6	46894.3	46956.6	40415	59713.7	48595.5	49297	59718.6	54347.5	47354.3	56236.8	56951.6	53541.8	52293.1	49224.3	52040.4	48986.8	46949.1	43020.6	43919.5	50307.1	45341.2	51440.8	55716.6	49573.2	61739.7	52214.3	46720.5	54709.7	51510.9	54542.4	51309.8	54327.4	48108.3	31284.5	38897.2	53159.6	56854	50307
A0A0D9QX22	A0A0D9QX22	A0A0D9QX22_CHLSB	GRAMD1A		4014.55	6662.63	4007.59	3708.16	4530.17	4105.23	5265.86	3727.82	2816.41			4731	4910.04	5719.67	6102.44	3947.1	6496.35	6323.67	4846.91	8066.66	2929.83	4185.86	5302.19	4970.92	4304.56	4945.47	2468.66	4999.48	3627.86	3909.59	3934.83	6971.32	4330.25	4494.91	4986.84	1854.54	4247.86	6372.62	2604.34	4315.93			2308.81	4639.8	4186.06
A0A0D9QX23;A0A0D9R734	A0A0D9QX23;A0A0D9R734	A0A0D9QX23_CHLSB;A0A0D9R734_CHLSB	CNOT6;CNOT6L		16443.6		3242.7	3407.56	3574.31				11324.9	6900.71						4999.28		8204.91	4134.3		8125.26	3457.58	4110.7	3025.94	6815.07		17058.3	4226.04		3859.16	8362.59		7756.68	4253.5		32368.4	3387.58	1680.77	22438.2	4070.13	33439.9	28620.4			4042.07
A0A0D9QX26	A0A0D9QX26	A0A0D9QX26_CHLSB	CTR9		15829.9	19204.1	17783.1	17042.3	19013.7	17468.1	16278.2	19027.8	15714.8	12432.2	15575	17284.3	13764	13933.9	12215.7	17978.6	16754.9	15340.6	15934	17487.1	17883.1	18295.7	18662.3	16185.6	15952.6	15110.3	13445.4	14365.6	15108.4	15848.7	16934.2	18260.4	16413.3	17742.3	17667.1	16400	15885.2	15913.2	14019.5	16136.2	9415.5	12741.2	14734	18186.1	14069.4
A0A0D9QX29	A0A0D9QX29	A0A0D9QX29_CHLSB	WDR59			1301.46		3909.83	2277.01	2798.31	2830.38	1458.8	3413.04	1435.44			2210.15			2005.15	1756.92	2626.88	2415.44				1791.15	2057.04	2163.8	1879.82	2650.23		2200.84	3146.66	2640.41	1756.13	3286.29	3100.76	2244.24	1622.06	3312.44	1574.36		2919.85		3410.83	3755.28		5618.94
A0A0D9QX32	A0A0D9QX32	A0A0D9QX32_CHLSB	EIF4G2		83962	63793.2	73315.3	71077.2	67222.6	72800.2	82086.2	66762.4	84830.2	87827	66892.1	62044.2	66922.5	66778.3	68570	74512.9	62913.1	76398.7	72917	72140.3	87349.5	75112.6	66719	72590.8	80903.2	65715.5	80394.5	69694.3	67656	73501.1	80577.5	66315.9	84190.1	76202.2	75404	85710	74471.9	68379.1	87958.1	72898.1	70139.4	81573.4	77710.5	65582.8	75235.9
A0A0D9QX35	A0A0D9QX35	A0A0D9QX35_CHLSB	SEPTIN11		17366.3	16316.4	18034.8	17434.4	14270.9	15632.5	18226.3	14384.6	18655	19270.2	18286.3	16272.9	18233.5	15448.6	17332.7	19390.1	16361.7	18407.5	18610.2	15112.9	19514.5	18739.4	16619.3	17674.1	19363.1	20435.5	22945.7	17658.8	15167.9	17715.3	16957.5	15887.7	17191.6	19599.3	15320	18225.7	16080.5	12947.8	17003.3	18288.1	21794.1	19946.5	20674	16813.7	18128
A0A0D9QX35;A0A0D9RMM2;A0A0D9RWN9	A0A0D9QX35;A0A0D9RMM2;A0A0D9RWN9	A0A0D9QX35_CHLSB;A0A0D9RMM2_CHLSB;A0A0D9RWN9_CHLSB	SEPTIN10;SEPTIN11;SEPTIN8		21574.6		12368.6	11075.7	12143.2	17761.7	23953.9		29135.3	33023.8	15173.3	13032.1	19588	14108	21824.5	24093.3	9390.06	16984.9	13902.2	5870.99	20982.7	19131.9	20991	20377.1	26835.7	24995	28917.2	20163.4	13954.7	23627.1	22513.3		15930.7	23608.4	10131.6	22285.4	19947.9	11072.3	36523.9	20840.8	8506.36	16631.4	29794.1	13806.9	24787.7
A0A0D9QX35;A0A0D9RMM2;A0A0D9S0H0	A0A0D9QX35;A0A0D9RMM2;A0A0D9S0H0	A0A0D9QX35_CHLSB;A0A0D9RMM2_CHLSB;A0A0D9S0H0_CHLSB	SEPTIN11;SEPTIN6;SEPTIN8		8330.99		8041.96	3834.68	1390.7	4340.36	17112.3		32270.1	35167.5	1573.88		3113.43		7378.25	7006.51	1630.45	9725.6	9536.3		22086.3	6341.28	2352.61	3225.54	24647.3	11822	81062.4	9172.66	1620.81	7411.24	13221		46564.6	4666.18		114514	4307.6		67556	4727.44	87919.2	82502.2	44102.8	1310.13	23158.7
A0A0D9QX35;A0A0D9S0H0	A0A0D9QX35;A0A0D9S0H0	A0A0D9QX35_CHLSB;A0A0D9S0H0_CHLSB	SEPTIN11;SEPTIN6		19568.8	15679.8	13382.1	19568.2	17246.1	18180.6	19470	15107.4	18274.5	18295	20879.9	21840.4	21357.3	21082.2	18072.4	16104.3	12162.6	15032.9	14080.3	13992.1	17102.6	19022.7	21767.2	18107.1	18743.2	10951.5	16351.4	16655.7	20037.3	21748.4	15244	12795	17146.8	18735.8	17237.7	22826.2	18806.4	19479.9	27216.2	17567.5	37379.3	16291.7	14429.8	19032.1	18358.6
A0A0D9QX38	A0A0D9QX38	A0A0D9QX38_CHLSB	SHROOM3		6552.92	23474.1	24911.3	27323.3	23576.3	24049.8	18634.3	24079.9	19987.3	19934.1	26969.6	29895.7	14767.4	21536.2	16047.7	16749.8	20836	16393.5	21811.1	23473.4	16158.9	24731.1	26236.7	22577.2	17830.6	28740.3	13012	27024.2	23506.5	24142.2	18557	20310.1	14056	20182.6	25113.9	21715.1	18936.8	21530.3	16225.8	22809.4		16625.3	13888.3	26054.7	19571.9
A0A0D9QX45	A0A0D9QX45	A0A0D9QX45_CHLSB	TSFM		27751.9	26042.5	28740	26235.4	23207.4	23943.7	26585.3	23772.8	27112	30800.5	28154.9	27636.3	25201.9	24640.1	27279.5	21913	26028.6	25668.6	24671.5	30528.1	27887.1	26184.3	22521.9	23891.8	25992.6	23984	28652.5	28157.8	27034.4	27134.5	23746.7	29794.5	27221.7	27450.5	27331.9	28885.8	28630.5	27860.7	31661.9	26428.1	25502	23657.4	31850.9	30523.4	25954.2
A0A0D9QX46	A0A0D9QX46	A0A0D9QX46_CHLSB										481.617		418.293			493.175			567.616								877.603				480.897	889.032	756.71						371.196	266.032						799.752	188.124	189.717
A0A0D9QX48	A0A0D9QX48	A0A0D9QX48_CHLSB	HTRA1			1179.36		2109.16		2541.19	1411.2	1041.68	1741.98	1258.1	1358.31	2498.3	1719.36	1499.62	1050.57	1870.15	1568	1390.79	1401.71	2179.38	1113.75	1329.34	1385.94	1533.35	1549.78	1756.09	1798.69	2731.49	778.813	1804.28	1697.5		1447.24	2456.31	1034.74	2201.76	1379.31	1302.95	2205.12	1975.41	3115.22	3165.64	2747.46	2202.29	1469.87
A0A0D9QX50	A0A0D9QX50	A0A0D9QX50_CHLSB	CIAO2B		83879.1	82823.4	87890.8	92497.2	77411.1	83090.6	78438.5	77026	75981.4	76478.3	84513.7	85100.8	78499.4	76074.5	75040	102120	65534.8	78866.5	87547.1	76582.9	81675.4	86122.6	74387.6	83973.1	76054.5	92324.1	65993.6	81592.2	80628.4	75023.3	82339.7	53611.4	69360.8	67226.4	77549.4	49521.5	67118.6	55419.5	56982.7	82285.3	28927.3	42758.6	80199.6	66822.3	78389.5
A0A0D9QX51	A0A0D9QX51	A0A0D9QX51_CHLSB	PLEKHA1		13278	11253.4	13601.1	10729	13492.2	12371.9	11216.1	12843	11123.2	10204.6	13788.7	13850.8	11492.8	11170.9	12776.1	14406.6	12396.3	12875.7	13674.5	12705.8	13704.4	10711.2	13065.6	11764.3	10213.8	15538.8	14253.1	11541.7	11749	11101.2	11153.6	10195	13361.2	14466.7	14068.2	11839.1	13755	10929.8	10010.9	13647.2	8687.62	9607.48	11056.9	13280.6	12986.7
A0A0D9QX54	A0A0D9QX54	A0A0D9QX54_CHLSB	UBA2		36661.8	26669.6	28189.4	35236.9	30986.7	32635.2	38429.4	27550.6	41760.9	44475.6	34024.4	33322.9	40827.5	31130	35770	32106.9	27628.5	29566.3	32434	26741.9	37125.6	36057.9	35454.5	36834.2	42665.1	36687.4	42641.1	40095.5	38238.3	42993	30257	26686	34573.1	33950.5	29155.5	42036.5	38450.6	33570.9	41745.3	42121.4	39865.4	40178.8	44711.6	40187.7	42867.4
A0A0D9QX55	A0A0D9QX55	A0A0D9QX55_CHLSB	METTL1		25835.2	20172.1	23994.4	24989.1	21756.5	23091.8	25462.3	21953.8	25143.3	23431.2	21793.5	22835.1	23344.1	24330.9	22118.5	22914.7	20750.9	22803.5	23253.9	19117.8	22182.5	23302.2	22828.4	22530.5	28739.3	21019.6	21238.6	25757.4	22969.3	21989.8	26470.1	21513.1	24010.9	25764.1	23494.8	18492.8	26006.7	22914.7	20574.6	21828.3	14073.3	16295.9	23296.9	22392.6	21972.5
A0A0D9QX56	A0A0D9QX56	A0A0D9QX56_CHLSB	SLC9A3R1		67580.7	45571.8	70660.5	71669.8	68945.4	71273.8	90620.8	64122.7	91008.1	88569.6	63854.5	61944.3	80928.9	56882.8	78186.2	79450.1	62186.9	77936.4	77225.6	50971.4	88054.6	89175.9	75297.3	83469.5	82408	80986.7	75081.7	78706	68766.8	79846.9	88649.4	55381.4	82547	87311.6	66865	93549.5	79628.9	71177.3	81266.2	85727	67583.8	73172.9	84373.2	63020.9	86038.4
A0A0D9QX59	A0A0D9QX59	A0A0D9QX59_CHLSB	CDH16		2870.08	1908.86		1609.99	1461.14	3019.85	1460.04		900.884				937.182			2003.7		2049.96	1980.66	1183.72	1275.5	1646.3		1543.7							3707.91		2823.79	2108.1	1232.3	1260.66	2394.84	1191.75
A0A0D9QX61	A0A0D9QX61	A0A0D9QX61_CHLSB	NAE1		38684.7	31785.8	34973.5	37940.6	37582.8	40290.9	40811.8	36155	41228.6	39643.3	38463.3	38916.9	39702.1	41045.7	42105.8	34498	34273.1	36585.6	38160.4	34113.1	39187.1	42608.4	41339.1	41660.9	38012.4	36294.6	36557.3	39507.1	41870.1	46790.6	40529.6	33439.3	34507	41872.7	36174	35874	37463.7	35293.5	35552.5	39970.7	32630.3	33705.9	27370.9	42126.9	38456.4
A0A0D9QX68	A0A0D9QX68	A0A0D9QX68_CHLSB	TACC2		7039.23	5328.11	4775.1	5861.9	5176.26	6221.15	8147.9	3639.08	8314.84	9108.24	3315.16	5940.15	5595.53	5513.48	7079.32	6195.07	3809.59	7023.49	5899.72	3370.79	7284.98	6688.45	6564.96	6636.94	7403.34	5240.97	7834.26	6106.39	5446.21	8167.02	5261.29	2970.46	7787.9	5348.06	5245.97	14347.5	7822.73	5438.05	10497.3	9140.76	14740.7	9667.77	9276.53	5344.61	8364.62
A0A0D9QX68;A0A0D9RSA4	A0A0D9QX68;A0A0D9RSA4	A0A0D9QX68_CHLSB;A0A0D9RSA4_CHLSB	TACC1;TACC2											4003.12																										1899.2			2347.11		4459.82	3909.45	4737.44
A0A0D9QX69	A0A0D9QX69	A0A0D9QX69_CHLSB	USP47		18638.8	12687.6	16211.3	16253.2	14975	17817	17455.5	14834.4	17611.7	16845.3	16317.6	15751.3	17072.7	15999.7	17756.7	18113.6	15249.5	18554.9	18948.7	14006.9	17196.6	17653	15711.9	18141	17838	17635.3	18995.7	18736.8	16887.6	17376	18825.2	17189.3	17666.3	18487.5	15923.1	15854.2	18269.2	15511.3	16772.1	18938.9	11535.2	16735.7	17003.3	17153.1	17432.4
A0A0D9QX70	A0A0D9QX70	A0A0D9QX70_CHLSB	FDXR		74241	65872.2	75010.5	64291.6	69067.4	75047.6	60113	75134.1	66052.6	65289.7	70027.8	63032	76396.8	74898.2	73840.1	70646.3	68119.7	70373.6	73330.7	69745.4	72784.3	71733.5	61859.9	64725.8	66978	61832.5	54840.1	74586.6	71498.7	74965.9	74486.9	70541.8	72898	70411.8	74180.5	60930.8	70953.4	72122.3	57068.6	65131.8	41271.4	46471.5	65034.5	72764.2	68031.8
A0A0D9QX71	A0A0D9QX71	A0A0D9QX71_CHLSB	NSMCE4A		6372.81	7932.58	8373.47	5138.65	6161.28	5989.36	6179.96	4710.67	7394.17	6697.8	6371.27	7616.07	6699.95	5748.48	5680.8	7304.56	4750.2	6652.86	5613.63	8363.48	6835.09	6882.8	6304.58	6362.77	6441.54	6049.97	7692.44	6668.21	6250.46	7305.91	5899.06	8187.61	6271.47	7299.25	7905.01	5679.86	6073.67	7866.37	5662.27	6566.75	7255.51	7667.75	7761.51	5818.38	8022.88
A0A0D9QX74	A0A0D9QX74	A0A0D9QX74_CHLSB	CDK4		15278.9	13452.7	13883	14328.1	12655.4	13191.8	11009.3	8586.7	10909.1	7816.04		6023.1	8193.24	8380.21	10158.3	12924.2	10888.4	12410.8	13370	11518	12853.4	10623.2	11392.2	10432.6	9839.62	9105.88	9560.07	9318.52	9361.82	8816.9	15220.9	11226.1	11731.9	13383.2	13130.2	14062.6	11319.7	9862.5	9496.41	9917.25	8720.46	8828.45	10619.1	9696.01	9358.49
A0A0D9QX75	A0A0D9QX75	A0A0D9QX75_CHLSB	DYNC1LI2		25184.2	27243.4	26416.6	27932.3	27857.9	26028.8	23353.9	26334.8	21694.4	21962.1	27080.8	29614.4	27128.3	26833.7	25147.1	24758.8	24999.3	24011.6	25336.9	28576.3	23585	23999.3	29713.7	27321.8	22114.1	24011.5	19231.2	23176.8	25833.6	23216.2	27677.5	28294.5	24353	29366.6	27489.2	20000.8	27326.6	27386.2	19707.1	23841.3	17700.1	17673.8	17447.1	25705.6	20612.7
A0A0D9QX75;A0A0D9RB03	A0A0D9QX75;A0A0D9RB03	A0A0D9QX75_CHLSB;A0A0D9RB03_CHLSB	DYNC1LI1;DYNC1LI2		24682.2	12060.5	21688.5	23841.6	21067.9	25241.4	24837	23054.4	19050.7	18422.5	17931.2	21168.3	19323	14002.3	17628.3	13804.6	8776.04	12748.1	16389.2	9310.36	15638.4	14897	14421.1	14942.9	13238.4	16126.3	10381.7	11790.7	12666.4	13020.4	7956.93	6378.01	10230.3	13373	7391.22	5936.26	10269.5	8787.48	6360.54	9961.71	11839.9	6370.39	6336.95	9237.22	6835.1
A0A0D9QX76	A0A0D9QX76	A0A0D9QX76_CHLSB	STBD1		3372.24	3006.59	2906.62	2247.43	3764.77	3122.84	4712.29	2457.64	1949.89	2479.72	1959.47	1983.41	3958.66	5235.25	5684.01	2783.51	6552.95	4603.42	3177.76	3155.67	2927.41	2885.62	3573.71	2902.75	4200.75	2891.17	2600.32	2226.72	2880.53	3472.89	3030.93	3610.35	7146.84	2826.52	2964.92	2359.66	5706.8	6229.03	5018.17	3210.18		4470.09	2201.66	2848.11	4621.58
A0A0D9QX77	A0A0D9QX77	A0A0D9QX77_CHLSB	TSPAN31		371.724					392.515				299.772							415.65			420.442	199.681		403.492		510.723	542.318	167.467		329.237						222.214		450.935			388.196
A0A0D9QX80	A0A0D9QX80	A0A0D9QX80_CHLSB	SCARB2		52779.4	49547.2	46792.6	43650.5	44549.1	50205.8	53210.3	44316.9	42092.3	52203.7	40934.1	40372.5	55059.3	38151.3	61875.7	52872.6	39132.8	51537.6	48126.3	29116.3	49383.4	51837.7	45044.4	53513.1	49459.3	47027.7	37421.6	45428.6	38617.4	51667.9	52361.3	36113	56415	49456.4	42733.2	38763.5	50234.8	49153.2	43015.8	51174.1	35379.3	47572.6	32630.6	43299.9	43328.2
A0A0D9QX83	A0A0D9QX83	A0A0D9QX83_CHLSB	NUP54		16279.1	13193.4	14695.6	15447.3	15966.1	15585.6	17827.1	14845.8	18236.7	17327.3	16013.7	15253.5	16376.3	14783.2	15593.7	16034.8	13109.7	16859.8	16388.7	12186.9	17467.8	16377.1	16858.9	16650.3	18231.4	16254	18903.8	16034	14732.1	18349.6	16604.8	11890.5	16812.1	17812	13994.6	18889.1	16246.3	14427.7	17713.5	15754.5	14487.5	18103.1	18249.9	14188.3	17901.5
A0A0D9QX84	A0A0D9QX84	A0A0D9QX84_CHLSB	ATE1		6677.99	4305.29	4531.63	6886.92	5819.1	7284.49	6143.91	5501.16	5241.5	5019.28	6440.81	5775.75	5910.8	5383.49	5287.22	5530.26	3033.85	5574.41	5685.69	6603.24	6100.08	6467.31	5959.55	5728.48	5110.42	4720.05	5633.21	4881.69	5093.86	6159.81	7296.98	3847.26	4908.77	4723.57	6632.34	4265.94	5871.31	6137.38	4280.97	4535.2		4916.82	6056.83	6338.44	5026.83
A0A0D9QX85	A0A0D9QX85	A0A0D9QX85_CHLSB	PDCD2L		6502.35	4018.94	4193.98	5388.84	5512.51	5800.85	2927.29		3779.16	3819.89	6687.74	4400.54	2125.04	4900.56		3958.55	5069.51	4568.87	3817.11	4142.03	3838.1	2788.75	7046.55	3641.63	4398.81	5460.08	7025.36	3854.23	5755.48	4469	4446.23	4118.83	4056.78	4353.39	6036.82	4527.84	3282.84	5129.01	4729.21	3277.06	5502.26	5482.69	5304.69	2458.31	4828.76
A0A0D9QX89	A0A0D9QX89	A0A0D9QX89_CHLSB	GPI		426848	398958	454274	449709	451558	471867	460732	395237	458271	470720	514543	493203	470051	463552	459625	454120	436653	456392	448228	400298	454002	484792	469637	498290	480010	511764	509862	496644	507082	500378	460894	423045	436399	476006	438412	484548	473267	464263	467147	504695	424518	469546	449227	467159	491636
A0A0D9QX91	A0A0D9QX91	A0A0D9QX91_CHLSB	GARRE1		1442.55	1972.9	1765.2	1958.72	1570.6	1187.44	1842.53	1824.19	1286.45	1505.65	2186.96	2181.68	735.764	1222.07	881.643	1750	2098.02	1402.11	1204.84	1249.27	1555.52	1032.9	1105.56	1354.29	405.762	965.082	623.926	1753.44	2265.27	1632.88	1435.24	1813.51	566.669	926.81	1423.86	656.722	813.063	1671.82	1009.53	1305.3		482.198	1165.27	1269.87	1396.63
A0A0D9QX92	A0A0D9QX92	A0A0D9QX92_CHLSB	HID1		2506.97	3004.54	2024.38	2643.94	3495.53	2626.24	2502.14	2278.99	1787.78	2690.07	1951.61	2683.18	2222.85	2870.66	2550.75	2483.8	1882.74	1986.5	1921.71	2905.72	2500.67	2226.79	2070.91	2614	2720.42	1805.98	2093.07	2665.54	2877.43	2704.46	2208.74	2052.98	2268.62	2517.58	2082.57	873.854	2562.26	1789.89	1981.06	2292.17	1355.88		1070.49	2153.01	2426.79
A0A0D9QX96	A0A0D9QX96	A0A0D9QX96_CHLSB	LSM14A		16650.7	13635.1	13247.6	18968.6	16497.3	18227.8	19432.4	8374.94	15272.2	17325.8	14164.8	15646.7	23980.2	13600	17872.8	15864.9	13562.3	14589.6	14917.5	8796.16	18324	21779.5	16618.3	18082.8	18895.6	12168.9	15398.1	20446.8	15792.7	21016	18081.3	5997.07	15718.4	16881.4	10247.3	12794.4	18376.8	12522.1	16193.3	17771.9	10671.3	12839.6	16097.7	11757.9	14590.9
A0A0D9QX98	A0A0D9QX98	A0A0D9QX98_CHLSB	MRPL58		10309.3		16496	8324.28	11419.6	15246.3	10200.2	6145.46	14325.5	12657.3	9943.81	7647.05	9183.4	7580.53	14647.5	12177.8	7213.88	12972.2	12221.3	10824.2	12748.2	10592.6	9405.9	9828.61	16406.8	10515.6	22556.1	12878.5	9359.85	7896.27	12136.6		12260.3	12773.2	6994.98	17638.2	15286	8630.18	24373.7	10533.9	18802.4	15030.4	17673.3	10170.6	11996.5
A0A0D9QXA0	A0A0D9QXA0	A0A0D9QXA0_CHLSB			4725	2859.57	3378.56	3337.9		3787.37	4216.08		4067.3	3590.8	3322.55		2974.1	3973.59	5090.97	4748.57	4751.55	5918.67	4187.42	3088.74	3961.4	3026.23	3561.58	3050.09	3620.58	4593.87	4806.87	2670.89		2887.15	4875.42	3640.1	5058.65	3952.27	3124.19	3728.12			3664.41	3160.56			5915.36	3131.64	4274.78
A0A0D9QXA1	A0A0D9QXA1	A0A0D9QXA1_CHLSB			98702.7	232681	139378	116026	132815	137141	129589	132014	73838.5	76135.8	136174	136212	89735.5	205656	128115	143831	264474	174528	168947	241195	104316	114601	110217	118310	122755	133180	73459.5	96225.7	116364	72368.2	128149	289370	176271	157446	153918	110056	142996	202716	81482.9	104425	56940.4	69599.4	64654.4	115299	98121.5
A0A0D9QXA1;A0A0D9S9S1	A0A0D9QXA1;A0A0D9S9S1	A0A0D9QXA1_CHLSB;A0A0D9S9S1_CHLSB			6940.17	8103.44	7497.11	7006.87	10603.1	5516.09	5334.9	5535.94	4998.86	4137.3	7306.68	6013.5	8570.65	12410.1	8189.76	7585.02	11386.9	8128.12	9402.97	6394.86	6190.75	6127.57	6978.12	6051.53	5942.6	6450.15	3945.83	8557.52	8730.59	5461.3	6804.65	5006.59	7042.52	7488.87	5648.06		8917.95	10104.9	5396.93	6295.83		7237.11	2368.48	6739.1	7985.16
A0A0D9QXA1;A0A0D9S9S1;A0A0D9S9S3	A0A0D9QXA1;A0A0D9S9S1;A0A0D9S9S3	A0A0D9QXA1_CHLSB;A0A0D9S9S1_CHLSB;A0A0D9S9S3_CHLSB			38622.1	13766.7	23545.9	21496.6	16420.1	27332.1	26598.3	21605.3	26492.2	30819.1	32953	14116.8	23436.3	41089.1	22099.6	37592.8	26799.3	47835.6	30773.7	13687.3	27760	34682	20604.8	29902.3	51463.1	21723.8	37313.1	36161.9	25377.3	29768.7	30611	17765.2	41026.6	30456.1	18038.3	38785.7	50707.4	23630.2	35770.4	25019.2	33743.6	37830.6	25246.4	17041.7	30132.3
A0A0D9QXA1;A0A0D9S9S3	A0A0D9QXA1;A0A0D9S9S3	A0A0D9QXA1_CHLSB;A0A0D9S9S3_CHLSB			3953.92		4957.81	5109.47	6788.33	6756.33	4794.01		4976.63	3550.08	3739.08	3056.32	5403.96	6269.1	3937.59		7361.79	4991.41	5777.8	5039.39	5519.73	5046.18	4896.03	5106.69	4826.53		3443.89	4795.31	5905.67	3202.55	6573.96	8847.66	5670.98	7224.99	6666.2	6586.21	6475.4	6732.99	4566.4	5309.95	3122.38	4104.8		4786.61
A0A0D9QXA4	A0A0D9QXA4	A0A0D9QXA4_CHLSB	KCTD2		666.561			684.518	846.67	1172.02	1039.83	859.937		1042.73		745.818				1753.82	1063.6		1280.08		916.175		1965.49	1054.77	419.051	1138.7	724.521	1785.66		1550.36		1139.62				1166.57		1353.08	1258.46		1713.95		1294.84		1136.92
A0A0D9QXA6;A0A0D9RP54	A0A0D9QXA6;A0A0D9RP54	A0A0D9QXA6_CHLSB;A0A0D9RP54_CHLSB	MICAL2;MICAL3		5873.7	13871.2	9196.64	8573.51	9184.72	8028.92	5722.55	11009.2	4507.83	6512.4		9142.8	6613.5	9388.6	8151.53	8739.41	9621.37	6806.79	7509.75	12457.3	5382.42	5577.02	8641.77	7144.12	5611.43	8405.47	2913.4	6551.78	10324.5	6087.41	6111.7	11260.8	5765.63	11856.2	10315.2	2979.22	8364.14	12553.2	2942.91	8022.64			3993.07	9461.7	6257.09
A0A0D9QXA8	A0A0D9QXA8	A0A0D9QXA8_CHLSB	OS9		11391	7840.15	9645.99	9190.37	10051.5	8694.09	7202.44	4611.54	6960.16	5289.96		5298.1	4857.86	4372.02	6462.27	9863.96	7989.54	10894.5	8050.31	7580.47	9604.05	9931.64	5798.32	8126.15	5867.11	5683.42	5848.37	6441.72	4145.4	6143.75	11299.1	6970.63	11129.5	9023.12	7622.46	9667.78	8040.28	6304.87	8349.43	5883.75	4910.7	7959.66	5195.35	3501.05	5054.46
A0A0D9QXA9	A0A0D9QXA9	A0A0D9QXA9_CHLSB	KCTD15		3398.18		4450.23	3746.07	3541.39	3464.58	3152.54	2895.28	2997.44	1783.66	4024.49	3776.58	2540.26	3075.7	3053.42	4274.55	3813.54		2380.46	3916.98	3352.28	2870.18	3560.44	4364.13	3416.58	3094.99	2429.05	2361.62	4311.37	3297.97	3603.7	3952.15	2579.76	2395.98	3230.16	2453.91	2478.45	3105.8	2643.78	2742.22		2206.7	4121.77	3520.61	3798.7
A0A0D9QXB3	A0A0D9QXB3	A0A0D9QXB3_CHLSB	PARVA		16150.3	9129.46	16515.7	14588.4	15645.8	14241.8	17320.9	9164.23	18063.1	17780.8	16166.1	13673.2	18358.7	16104.5	17708.3	14659.8	13662	12395.9	16029.3	13194.9	15872.2	15952.7	16575.6	15820.4	16689.3	12730.9	14912.7	17797.5	16481.3	19027.9	15288.2	8961.75	16319.9	16536.7	14189.8	15476.3	15835.7	13178.2	17215.3	18577.3	14620.1	13784.4	12169.4	13909.4	15040.1
A0A0D9QXB6	A0A0D9QXB6	A0A0D9QXB6_CHLSB	TEAD1		4171.67	8292.21	9164.11	5144.71	8301.24	6165.47	5037.28	8753.29		6246.38	6448.41	5572.54	6502.5	6027.94	5788.54	8068.7	6991.46	6028.64	5324.95	6660.66	4658.16	5412.97	6487.97	7605.74	6515.22	4985.79	5435.57	4959.63	6416.95	6588.21	4749.83	6845.67	5156.16	4471.51	7153.57	3961.21	4324.9	7049.01	4676.52	4930.59			7413.11	6419.4	3939.92
A0A0D9QXB7	A0A0D9QXB7	A0A0D9QXB7_CHLSB	PEPD		75247.1	58447.5	60612.3	71592.6	63945.7	66877.9	74183.7	55937.2	71079.5	73762.6	62699.3	64248.3	65396.6	59934.9	64004.5	82010.2	59136	70248.8	70018.6	58364.4	68329.4	70972.4	63589.9	65330.9	74353.2	69893.6	74476.6	63838.1	57181.1	67052.3	79306.1	56787.9	71761.7	71762.2	54303.4	68333.2	59159.8	52020.3	61539.8	73835.8	60140.1	67206.3	86102.5	56904.1	70546.4
A0A0D9QXC7	A0A0D9QXC7	A0A0D9QXC7_CHLSB	USO1		42692	43338.2	44686.4	45083.3	46189	46097.3	42227.2	44913	45466.4	44770.6	46969.4	45283	47844.4	45858.9	46604.8	44335.3	40148.1	42427.8	40762.2	41276.5	44155.4	43512.2	47404.2	46821.5	42403.7	44984.4	40335.8	47208.9	44289.3	49779.5	42337.2	39309.1	41472.1	43145.4	42366.5	40241.6	42553.2	43025.1	44555.8	43423.5	35344.5	35635	40523.4	44013.1	46301.7
A0A0D9QXD0	A0A0D9QXD0	A0A0D9QXD0_CHLSB	WDR11		10996.2	6065.11	7896.87	7526.03	6861.57	8026.15	9373.81	5434.56	8880.87	9558.04	6053.07	6858.06	9723.97	7288.11	8825.01	8541.31	5991.48	9977.88	8604.15	6461.84	8762.69	7585.04	6465.67	6343.68	8460.9	7458.89	10525.1	7658.67	7496.04	8979.92	10739.7	7204.7	8706.24	8699.3	4701.26	10121.8	6518.69	4542.49	7705.74	8016.88	7569.29	7753.16	6363.78	6308.88	7720.03
A0A0D9QXD1	A0A0D9QXD1	A0A0D9QXD1_CHLSB	FAR1											2076.87								10715.9	3717.34			2476.49			3150.1								8045.12			3639.03	3697.99		3168.84	3014.23		4057.33
A0A0D9QXD3	A0A0D9QXD3	A0A0D9QXD3_CHLSB	GOT2		25967.9	38652.8	34444.5	28087	35397.8	37790.6	29476.8	32128.9	32563.1	27338.4	48325.3	44149.6	63073.1	40369.3	44682.1	26323.7	40123	43899.9	29724.3	33307.3	33112.7	22328.1	44092.9	61971.1	31875.8	35894.1	34461.4	29983.9	41172.1	35190.1	37045.3	55755.2	45301.6	37253.5	42455	33675.1	30866.5	36579.2	27812.4	34273.3	20007.2	23763.8	25359	48458.4	36576.5
A0A0D9QXD5	A0A0D9QXD5	A0A0D9QXD5_CHLSB	G3BP2		19501.4	19458.8	23360.4	22842.4	23406.5	21883.1	17403.7	18824.1	18071.7	16879.2	20846.4	20372.7	19043.1	17488.4	18326.6	23444.3	20811.5	21041.7	22541.8	19161	22197.7	20427.8	21802.4	21814.9	18477.5	21315.6	18362.2	19307.9	19403.4	18951.3	21724.8	20098.1	20461.3	22478.7	22404	18043	19512.1	18836.3	17796.3	19576.9	15745.4	15539.9	17198.9	19418.3	18582
A0A0D9QXD5;A0A0D9REQ6	A0A0D9QXD5;A0A0D9REQ6	A0A0D9QXD5_CHLSB;A0A0D9REQ6_CHLSB	G3BP1;G3BP2		33669.8	48788.1	41783.7	42214.9	44108.6	41860.6	21575.7	34605.4	23283.3	25307.5	37045	32191.7	25649.8	29484.7	24644.1	52417.4	51188.1	38325.1	42746.8	50119.4	31394	28273.4	36826.8	37258.6	23697.9	36760.6	24002.7	32719.1	35327.3	25318.6	37773.9	48936.9	32322.6	31485.8	53232.4	20296.3	25448.6	37746.9	21710.7	28555	12529.3	15187.5	30386.6	33268	21282.7
A0A0D9QXD6	A0A0D9QXD6	A0A0D9QXD6_CHLSB			5056.07	7207.18	7149.73	5867.09	5428.95	6131.94	4093.19	8192.51	5074.06	4541.31	8292.18	6946.72	6050.77	7269.45	4614.63	4654.22	6421.68	4892.88	6487.56	7316.53	4850.2	5179.19	7350.03	5586.55	4801.19	5317.05	4983.14	6145.85	5242.08	5251.83	4284.31	8050.82	4574.84	5368.59	8341.77	5119.14	5655.64	7406.11	3629.71	4606.83		6291.59	4431.86	6422	4885.21
A0A0D9QXE3	A0A0D9QXE3	A0A0D9QXE3_CHLSB	JPT1		18789	18429.5	23228.4	22673.2	20202.3	22852.3	24689.2	18546.8	22688	20469.4	20411.8	25198.7	21665.8	17487	19419.4	27680.6	21345	19381.6	25235.3	20999.8	23185.5	22870.2	25407.9	24702.9	23177	22677.1	21718.5	24105.2	20353.3	22646.5	27256.2	18400	22257	24561.8	24459.9	28845.9	23093.4	21464.1	22454.8	26539.2	17259.3	17387.1	24761.5	21791.4	23442.5
A0A0D9QXE4	A0A0D9QXE4	A0A0D9QXE4_CHLSB	RRAS2		3898.71	6075.84	5991.89	5630.39	4650.48	5558.38	4709.35	6137.76	3567.32	4236.56	4730.13	5359.27	5352.95	7114.46	6000.17	5061.27	7297.31	4459.68	4741.38	6084.21	3784.73	4187.04	4534.25	4560.05	3952.69	5536.91	2976.29	4631.72	4761.24	3576.24	4682.2	8216.99	5469.48	4789.21	3578.09	2250.85	5624.49	6944.85	3092.99	4483.76	2679.52	4010.46	3598.91	5381.29	5038.26
A0A0D9QXE8;A0A0D9QYS5	A0A0D9QXE8;A0A0D9QYS5	A0A0D9QXE8_CHLSB;A0A0D9QYS5_CHLSB	SUMO2		15639.9	12784.5	10713.9	13105.5	11965.2	13313.1	12710.3	14346.1	12014.2	12158.1	11010.1	13899	11529.3	13374.1	10100	16513.6	11097.3	11414.5	16578	16638.1	11879.2	11685.6	14404.8	14149.5	13254.7	15494.7	13617.2	10460.4	14377.8	12639.9	11950.8	13381.8	15674.7	16324.1	15328.6	12148	15007.9	15117.9	12059.6	13747.4	11696.6	9535.94	16347.9	14066.7	13537.6
A0A0D9QXE8;A0A0D9QYS5;A0A0D9R589	A0A0D9QXE8;A0A0D9QYS5;A0A0D9R589	A0A0D9QXE8_CHLSB;A0A0D9QYS5_CHLSB;A0A0D9R589_CHLSB	SUMO2		133276	15380.2	33367.9	42669.3	54793.8	65119.6	162241	23797.1	135738	188366	33215.6	32932.2	80473.2	30540.7	87452.2	47028	29603.2	85682	35489.4	15850.3	139686	74431.8	49530.2	62661.2	125672	83823.2	268757	56833.4	40665.3	79183.6	58649.7	16459.3	110832	83279.6	28569.3	275349	57938.6	35455.8	179248	80940.9	205829	261199	145523	32210.7	88244
A0A0D9QXE9	A0A0D9QXE9	A0A0D9QXE9_CHLSB	SEC23IP		19959	22074.9	18760.5	19399.2	18098.3	19464.4	21380.3	21482.3	21993.7	20019	24528	21646	19909.6	19105.4	18695.3	18520.5	21454.7	17862.7	18251.6	18965	18471.7	18959.8	20514.9	19311.4	20720.6	17964.5	20631.6	20736.2	20587.2	20060.9	19821.8	20564	21511.4	19202.4	19199.6	19623.4	17970	20383.3	20451.6	20194.9	18558.2	20482.8	22655.4	19476.7	21279.1
A0A0D9QXF1	A0A0D9QXF1	A0A0D9QXF1_CHLSB	GPATCH1		4777.76	7877.74	4595.29	5882.09	4539.27	6141.52	4912.55	3783.09	5407.02	5142.98	5054.54	5221.95	4615.52	5138.98	3838.21	5920.43	5138.49	4790.79	6067.18	4914.51	4980.08	5818.86	5479.87	5159.84	6544.43	8316.26	6632.63	5714.5	6132.79	4943.98	6010.11	3588.24	4756.17	6194	4559.21	4446.81	6868.02	5260.97	4546.89	5584.87	3951.56	4875.22	7480.06	4731.61	4810.3
A0A0D9QXF2	A0A0D9QXF2	A0A0D9QXF2_CHLSB	COPB1		38898.1	31225.4	35144	35777.8	35340.8	38243.3	38128.9	32511	37690.1	38547.4	37152	32951.5	36000.8	37175	36491.9	35165.8	35310.3	39230.2	32666.4	33267.5	38169.3	37582.1	37322.6	38098.4	38475	33665.3	36259.8	37009.3	38091.7	38979.7	36323	34712.6	38958	35199.4	35364.8	36343.4	34812.6	33929.7	37585.5	38635.1	34660	38167.9	33777.6	38358.3	38303.3
A0A0D9QXF4	A0A0D9QXF4	A0A0D9QXF4_CHLSB	MCMBP		9368.35	8192.39	10061	10418.2	9291.93	8837.87	10688.6	8529.71	10855.9	9579.42	7022.87	8288.11	8845.77	7924.52	7975.54	8797.68	8038.67	9544.84	8834.77	10039	10667.8	8998.12	9891.19	8673.04	10031.4	7530.27	9855.01	8207.81	8844.58	8311.9	8177	9226.88	10451.8	7933.67	9381.06	10133.1	9077.17	8809.02	9395.57	8837.71	9013.05	9318.9	9177.06	9529.28	8252.23
A0A0D9QXF6	A0A0D9QXF6	A0A0D9QXF6_CHLSB	NUP85		13431.9	11542.1	12500.2	13721.9	14698.4	14834.8	16012.3	11037.4	13856.3	15425	11274.5	11961.8	13983.8	12335.8	14470.5	13751.4	11518.4	14661.3	15325.4	12389.9	15373.1	14666	13723.4	13758	16533.7	14051.4	14760.7	14949.1	15317.6	14435.5	15337.4	11263	14531.6	14496.8	12431.6	13845.9	14863	12869.7	14116.5	17415.6	12218.6	14484.9	11833.5	14769.6	13958
A0A0D9QXF7	A0A0D9QXF7	A0A0D9QXF7_CHLSB			72514.3	61256.5	56043.8	62282.4	52667.5	66317.8	73733.8	59729.9	73452.6	86186.3	77703.5	79630.8	65045.8	56780.8	64922.9	69837.6	54007.1	57555.4	81053.8	71019.8	79350.1	81155.7	68405.8	76646.7	74883.8	86273.9	81125.5	90972.7	76573	75265.5	83802.4	65921.5	71084.3	85466.4	66616	83075.8	86780.5	76721.1	67824.6	93727.6	64946.5	78421.2	93410.8	75253.3	80765.4
A0A0D9QXG2	A0A0D9QXG2	A0A0D9QXG2_CHLSB	INPP5F		481.058	736.158		580.075	716.467	643.558	756.677	636.466	648.45			990.772	504.47	653.72	671.768	751.845	195.005	514.475	1358.54	660.792	537.447	684.234	816.366	487.155	1156.68		1521.16	653.639	1006.83	264.225	595.776	409.72	678.174	853.831	671.688	643.222	1148.51	555.729	273.498	1279.49		962.729	916.658	579.158	1194.76
A0A0D9QXG3	A0A0D9QXG3	A0A0D9QXG3_CHLSB	GGA3		6600.01	9783.87	10549.8	8163.19	8910.55	7708.43	7161.8	10912.9	7423.33	7600.99	6434.86	9843.05	9528.3	9812.34	6936.7	6528.36	7707.57	7470.51	8815.89	6425.82	7255.61	8846.44	9576.59	10130.6	6607.06	6268.64	6050.9	9183.78	9446.55	10837.8	2478.4	7149.63	5787.45	8391.43	7351.23	7886.47	9647.62	9286	6138.23	8690.62	5882.23	6076.81	4933.53	9515.97	5137.03
A0A0D9QXG3;A0A0D9R4S7;A0A0D9R3A9	A0A0D9QXG3;A0A0D9R4S7;A0A0D9R3A9	A0A0D9QXG3_CHLSB;A0A0D9R3A9_CHLSB;A0A0D9R4S7_CHLSB	GGA1;GGA2;GGA3																										1695.25				1037.42		1472.79		2964.17	2523.91	1056.74	3078.31	2027.51	1341.77		2820.93		5838.59		1468.28	5357.2
A0A0D9QXG4	A0A0D9QXG4	A0A0D9QXG4_CHLSB	CNOT1		18664	19036.5	20232.8	19123.6	20393.1	21008.9	21168.9	18693.3	18035.7	19856.4	18886.8	19485.8	18873.6	19484.8	19118.3	20574.1	19833.7	20022.3	19908.7	19343.5	20087.2	21645.6	18841.2	18865.3	20871.6	19189.3	18412.6	21069.8	19398.6	20424.7	21804.1	19252.8	20833	22122.7	21208.1	17202.4	20389.3	21592.8	19091.8	21824.8	17505.2	17092.8	17038.3	19934.6	19214.5
A0A0D9QXG7	A0A0D9QXG7	A0A0D9QXG7_CHLSB	MRPS7		36812.3	34945.1	32248.9	37859.1	39558.2	35651.7	38311.8	36595.8	34620.3	39634.4	31196.4	32182.5	28774	33428.1	30617.2	31762.2	34979.7	31672.6	30776	41454	40560.2	39508	31526.2	34231	32570	26464.1	29881	31237.2	37808.9	34900.3	39403.9	41249.7	38994.7	39156.2	44070.9	32473.6	41171.7	54862.2	41305.8	36391.3	24544.9	30796.5	41995.8	41124.4	38430.7
A0A0D9QXG8	A0A0D9QXG8	A0A0D9QXG8_CHLSB	BAG3		15339.8	18018.7	16204.8	19773.1	16835.6	17610	17346.1	18387.9	16220.4	15762	16713.8	15786.3	15556	15550.2	14779.5	16048.6	16041.3	15450.2	19732	17388.7	17348.4	17873.5	16656.9	18033	15413.8	15306.6	14603.9	14673.4	14847	14753.7	15346.2	17937.3	12635.1	15716.9	14624.1	13961.9	15921	15579.8	14442.5	15153.2	12580.1	10181.4	16743.2	15155	14777.4
A0A0D9QXG9	A0A0D9QXG9	A0A0D9QXG9_CHLSB	DTX3		1793.54	1086.98	1013.68	904.658	2049.78	1415.17	1180.74	954.587	581.876	982.787	1394.47	1105.26	1977.7	1592.15	1288.3	1651.28	841.834	1162.27	1731.09	1310.09	1975.31	1528.59	1939.17	2223.51	1520.95	1625.33	932.957	1278.75	1072.43	1390.46	1352.58	951.282	1056.36	1484.76	1506.67	1548.51	1341.2	1056.95	821.33	1628.98	1269.45	1498.27	1429.36	1000.32	850.245
A0A0D9QXH2	A0A0D9QXH2	A0A0D9QXH2_CHLSB	MIF4GD		8011.16	7117.93	9875.86	9193.36	9285.27	9051.83	8802.43	7250.94	7597.23	6843.57	7595.04	8376.08	8230.07	6805.42	8424.44	9320.56	7658.06	9035.45	9648.65	7662.27	8155.26	8587.74	8923.28	8995.28	7428.99	7899.16	6023.71	8707.79	8923.39	9468.86	10147.4	5993.82	8298.62	8653.87	7047.96	7315.5	7589.28	8124.79	6463.46	8271.87	6651.08	5616.86	5859.31	8063.45	7431.6
A0A0D9QXH3	A0A0D9QXH3	A0A0D9QXH3_CHLSB	TIAL1		13925.5	15187.1	15011.8	14562.9	14067.8	15083.9	12763.7	13866.3	13445.4	12596	16984.4	15461.3	13810.2	14817.6	15171.4	14367.1	13498.1	12774.1	13090.8	11980	14306.4	12285.5	13218.4	15878.6	13617.8	17162.3	13754.6	14566.5	15064	15757.5	13481.5	11633.6	13502.6	14046.8	12690.7	10615.1	14508.4	12774.2	10778.7	14649.1	12311.3	10361.4	15048.6	18758.8	16638.9
A0A0D9QXH5	A0A0D9QXH5	A0A0D9QXH5_CHLSB	RGS10		18998.1	20896.6	21590.6	26292.7	25023.3	24896.8	22704.8	25988.4	19604.4	21006.8	24205	25179.8	23071.4	25429.9	22278.6	24820.4	22245.1	19393.1	27439.1	20709.9	22766.4	22513.8	23026.7	23110.7	20538.5	26152.1	23825.1	24463.3	25721.6	22825.2	19557	22554	18473.9	24421.8	20521.6	18009.4	21858.4	25300.9	18611.1	24311.2	23347.4	21090.5	28368.3	32045.2	27261.1
A0A0D9QXH8	A0A0D9QXH8	A0A0D9QXH8_CHLSB	GRB2		34435.8	32354.9	36106.6	38258.3	34530.3	34484.5	31120.4	29068.4	26366.1	29412.5	33065.7	29430.6	30073.2	31575	32782.8	35661.4	33279.2	30697.1	33697.1	32594.2	30869.2	32212.6	31374.9	30492.8	29632.7	35833.7	31113.1	34043.6	30811.8	34334.2	35011	30678.4	29585.3	33936.3	35655.2	28222.4	34894.7	29934.8	28321.6	32489.9	31299	31627	26808	30189.5	27447.1
A0A0D9QXI2	A0A0D9QXI2	A0A0D9QXI2_CHLSB	PIP4K2C		19307.6	18631.4	18192.4	19559.2	15267.3	20151	18150	19568.3	16788	20366.1	19360.2	21868.9	16110.3	17996.1	16561.9	18430.8	17325.2	18860.4	22093.8	22661.7	21131.4	21242	20068.2	18769.4	20604.5	21734.9	22629.3	22312.7	20555.2	18051.5	18556.8	23111.6	18191.5	20369.5	22089.3	16299.1	17487.2	22193.2	16730.2	21096.5	18523.5	20271.3	18603.8	18805.5	17693.3
A0A0D9QXI5	A0A0D9QXI5	A0A0D9QXI5_CHLSB	SLC25A19		7025.98								4023.19									6261.05							4656.72								5494.18			3760.07	7393.82		6855.62			3455.86	7639.41		6547.49
A0A0D9QXI7	A0A0D9QXI7	A0A0D9QXI7_CHLSB	GINS3		14369.8	12160	12531.2	16545.2	14451.9	13176.2	15175.3	16639.7	13881.5	13825.5	10900.3	15263.2	14103.1	13033.4	13527.9	14892.1	12353	13398.7	14091.6	16119.7	14473.5	14111.7	18542.2	15393.6	14606.1	14028	14476.9	15160.7	12970.9	14223.5	14022.7	13652.7	12942.7	14060.2	17111.5	12850.5	14009.3	15530.9	13541.5	15889.4	9839.46	13448.6	15776.1	14803.5	14349.1
A0A0D9QXJ1	A0A0D9QXJ1	A0A0D9QXJ1_CHLSB	PRDX3		155089	87973.5	112390	103407	117085	108327	122977	77151	165026	137940	86490.8	96847.1	133156	93724	138768	128777	101906	134772	119975	89176.1	132336	115968	87671.3	97147.3	132342	114903	163645	123762	111842	133537	145914	74822.7	146686	119672	98338.9	151529	100504	82023.1	134526	116068	126895	152482	133896	102423	142336
A0A0D9QXJ2	A0A0D9QXJ2	A0A0D9QXJ2_CHLSB	C11orf58		7181.29	6293.27	6218.52	5644.19	7953.87	6108.87	5829.12	5158.03	6330.27	7015.02	9366.55	5674.29	7699.53	3677.3	5161.16	6594.96	6295.99	4870.57	5129.56	6212.64	6335.74	5986.45	5907.1	7237.52	5698.65	4177.11	5983.84	4498.1	4229.59	4797.17	5496.35	7770.83	6628.02	5738.01	6547.78	6930.62	5788.64	8493.4	6452.06	4954.46	5996.3	5625.36	6456.66	4963.16	4879.37
A0A0D9QXJ5	A0A0D9QXJ5	A0A0D9QXJ5_CHLSB	CASKIN2		11633	5738.61	8022.25	10831.6	9968.07	10071.4	11895.3	5639.69	12686.4	10540.1	10278	10124	10450.9	10105.5	10328.7	9970.92	9416.28	8990.95	8945.32	6938.77	10668.3	12132.5	12141.4	12261.9	10770.5	10309.1	9950.39	13006.4	11302.8	13607.2	10445.2	7367.61	10937.8	10248.7	9772.02	7190.69	11901.7	9270.01	9777.01	11311.8	6278.92	8819.73	11956.5	11188.4	12341.6
A0A0D9QXJ6	A0A0D9QXJ6	A0A0D9QXJ6_CHLSB	SFXN4		6291.04	6873.63	8874.26	9763.39	10883.9	8967.48	14184.7	10477.5	9185.55	9998.44	9739	7616.91	12007.8	11740	13760.4	7942.68	13848.4	12305.3	9658	9472.41	8452.53	9520.74	9058.4	10909.9	12712.2	8090.58	8279.38	9491.52	9860.29	8781.02	7904.02	10229.8	12586.6	7159.56	8546.93	9457.44	13579.7	13056.5	9560.39	8521.35	5209.2	7174.21	6915.27	9968.63	11474.5
A0A0D9QXJ7	A0A0D9QXJ7	A0A0D9QXJ7_CHLSB	PLEKHA7		2993.09	2490.29	3244.76	3092.28	3340.68	3604.34	3119.49	3158.08	2969.06	2930.01	2636.7	2268.21	2515.76	2383.78	3378.83	3332.03	2388.74	3329.62	4177.93	3227.37	3613.98	3715.02	2992.87	3017.36	3314.63	3462.67	3225.75	2195.45	3475.86	2810.61	3464.92	3232.01	3153.42	3345.32	3119.37	2950.63	3565.04	2723.37	3081.19	2317.72	1992.53	2127.06	3776.03	1963.16	3053.58
A0A0D9QXJ8	A0A0D9QXJ8	A0A0D9QXJ8_CHLSB			4969.4						4202.8		6329.42	5666.76			4469.64	6318.06	2301.05	2782.08		4342.3			5968.68	4931.76	3273.96	4434.43	4693.44		2828.88			7259.12			6927.72		3300.86	9943.38	3753.77	3195.79	6266.72		10705	6204.52	5877.87
A0A0D9QXJ8;A0A0D9SDN3	A0A0D9QXJ8;A0A0D9SDN3	A0A0D9QXJ8_CHLSB;A0A0D9SDN3_CHLSB			612.114	1534.11	1716.64	1343.56	1745.07	1235.44	1609.05		1303.1	1813.48		1602.85	1110.99	831.301	1572.59				1630.81	1332.8	1131.28		1300.05	1443.61	1313.82				1184.5	1313.77			1900.49							1256.47				1615.61
A0A0D9QXJ9	A0A0D9QXJ9	A0A0D9QXJ9_CHLSB	RHPN2		22682	21047.8	24808	24924.4	26927.2	24987.7	23466.6	24227.1	19628.1	19892.7	25513.7	25370.1	23303.6	22711.1	20209.8	24525.8	22387.2	21853.8	25204.7	20538.8	23795.9	25172.5	26283.5	26050.4	23299	23831.9	21165.3	26152.5	22569.4	24570.4	24136.6	18623.5	19894	27221.4	24740.8	20359.7	25767.8	28676.8	20006	27482.3	16833.9	15853.9	19570.7	25345.4	23465.3
A0A0D9QXK1	A0A0D9QXK1	A0A0D9QXK1_CHLSB			239243	273887	278609	323351	291000	305086	275540	306938	213845	183336	312926	253846	240087	277054	264961	349325	348271	283938	345492	317692	269014	290320	282494	293001	221456	286538	163068	253342	281845	211703	307978	405019	249449	318900	324415	165930	279665	307744	144877	283569	108237	132852	255146	289241	244414
A0A0D9QXK1;A0A0D9SA07	A0A0D9QXK1;A0A0D9SA07	A0A0D9QXK1_CHLSB;A0A0D9SA07_CHLSB			35863.4	51548.2	30738.7	51235.5	37258.9	40117.7	46325.3	63116	40091.6	27536.9	37442.8	45104.8	35134.5	36879.6	38402.3	37568.1	48148.2	50841.7	44674.9	55126.3	49270.5	42614.6	43981.9	36564.2	36057.3	40989.5	67718.6	40046.1	41215.1	37843.2	53126	48382	60646.1	52751.6	56911.1	57976.7	54610.3	57521.2	58458	52468.1	36801.7	56726.3	56556.5	47484.6	52774.8
A0A0D9QXK4	A0A0D9QXK4	A0A0D9QXK4_CHLSB	PIK3C2A		10955.5	13484.7	11237	11979.7	11449.5	12247.3	12452.6	13549.2	11584.5	10906.4	11636.8	12805.8	11713.9	11812.4	11454.4	10346.1	11628.8	11040.9	11214	11862.5	11326.5	11738.2	12684.9	13098.3	12705.4	10932.8	10306	12054	12864.2	12674.6	11401.1	12581.2	11578.2	13459.6	12299.9	8884.17	13066.6	14481.4	9823.41	13504.3	8961.2	10973.1	9103.1	13542.6	11932.5
A0A0D9QXK8	A0A0D9QXK8	A0A0D9QXK8_CHLSB						820.778	1366.18	2302.77	3502.69		2801.69	5565.33	3500.4	2323.09	2209.29	2490.02	3414.03	8745.29	1915.94	10426.3	6154.07		5400.89	1958.05	3964.58	6122.73	8876.09	10254.9	12256.6	9143.62	15978.5	18899.1	23161.2	2583.81	38940.4	25004.9	9950.13	39654.8	27316.1	13866.7	39720.8	41094.6		16058.4	49357.5	9173.29	30662.1
A0A0D9QXL1	A0A0D9QXL1	A0A0D9QXL1_CHLSB	CSNK2A2		20790.1	20293	21519.3	20564.6	21102.6	22398.2	22465.1	22573.6	22882.3	22928.7	24044.2	24771.9	24007.3	25389.1	23723.8	20075.7	20735.4	20345.3	23931.8	21454.6	22623.2	23444.9	22965.7	25370.7	23801.5	23121.7	20425	26809	26554.1	25381	21528.7	19699.5	20992.8	22577.9	20855.2	18454.8	24230	24792.2	21057.6	24582.1	14288.9	19380.3	23109.6	31182.3	29874.1
A0A0D9QXL3	A0A0D9QXL3	A0A0D9QXL3_CHLSB	CFAP20		5596.27			5251.75	3070.65	4304.78	5901.99	3347.83	3227.95	4791.25	3019.75	3483.2	1869.28	4214.32			3619.09	4787.49	5426.75		4429.24	4374.33	4065.07	3403.94	8712.19	5877.4	9508.98	3421.43	4145.04		4023.39	4155.8	5676.2	7179.16	4062.89	3204.41	5167.02	3340.37	2642.86	10262.8		15689.6	2745.83	2657.63	2427.35
A0A0D9QXL4	A0A0D9QXL4	A0A0D9QXL4_CHLSB	EIF3A		105414	81931.9	94906	104570	93704.4	101623	107983	89568.1	107417	114843	93460.7	93468.5	100206	91734.6	102875	98329.3	87187.8	99817.2	101091	89231.3	109852	110377	95748.7	101550	115731	104325	112353	110051	105795	107882	109997	86536.6	107319	107056	99034.1	107834	113100	103234	113411	118339	103247	103550	100595	98918.6	108800
A0A0D9QXM1	A0A0D9QXM1	A0A0D9QXM1_CHLSB	CACUL1		5249.23	5112.81	5675.54	5135.54	5582	5331.03	3769.66	4365.66	5020.72	4780.38	5088.44	4666.83	4109.44	4936.57	3682.6	4072.35	4192.1	5076.72	5726.92	5274.85	4795.7	4683.93	5758.14	5777.93	4810.11	5000.6	2846.97	4208.84	4714.56	4682.08	4581.22	4237.05	3743.53	6000.96	5150.06	3419.94	5144.86	5665.06	4055.8	4916.55	1458.91	2039.94	4488.17	5443.43	4989.13
A0A0D9QXM7	A0A0D9QXM7	A0A0D9QXM7_CHLSB	CHKB		7181.63	7713.07	6749.42	5175.53	5706.59	5403.48	6415.81	7049.12	5944.03	5446.16	8685.31	6050.61	5690.03	6811.39	5134.96	5922.68	5965.73	6362.2	5736.89	5422.65	6298.74	6692.86	6912.61	5813.6	7474.98	6314.51	5030.84	7211.59	6514.54	5817.52	6098.92	6926.4	5407.59	5482.82	5781.56	6175.9	5521.92	5226.36	5672.52	5692.56	4880.5	4829.6	4736.72	3587.3	4921.41
A0A0D9QXM8	A0A0D9QXM8	A0A0D9QXM8_CHLSB	AFM		2695.01	3432.95	3547.89	2697.18	1725.86	1734.4	1336.78	1709.46	1163.82	717.506	1608.76	1361.58	1241.1	1907.9	1904.99	3518.17	3912.89	4322.55	1857.81	2299.71	2154.79	988.482	2150.16	1442.44	1252.01	2027.14	1041.17	2137.23	2515.81	1748.83	3132.08	3657.43	2693.5	1591.27	1213.06	1162.42	1320.17	1260.63	890.569	1214.74	3240.32	1220.54	1633.14	2418.25	2194.77
A0A0D9QXM9	A0A0D9QXM9	A0A0D9QXM9_CHLSB	RAB11FIP2		23372.5	11600.2	15702.5	16265	12919.9	17226.9	14297.6	7421.72	20389.9	17336.8	10875.8	12651.3	15543.4	12700.3	20045.7	19159.1	10442.3	20882.7	15657.6	9646.72	20363.7	17032.4	9364.77	15213.8	17620.9	12802.1	21230.5	15966.2	12134.7	19626.2	17907.7	11999.5	19187.5	17519	11412.9	24552.6	17883.2	10602.3	20693.9	17333	18303.1	23839	23095.7	13456.3	24685.9
A0A0D9QXN0	A0A0D9QXN0	A0A0D9QXN0_CHLSB	EMX2																																	3521.32	3133.35
A0A0D9QXN1	A0A0D9QXN1	A0A0D9QXN1_CHLSB	PDZD8		3250.99	5300.88	4553.77	4610.12	4806.08	5460.94	5088.32	2745.74	3921.13	3296.54	2133.92	3152.46	4740.3	5817.1	5390.87	2865.63	5435.83	5142.1	3865.52	4432.42	3250.53	4344.48	4633	4476.53	4298.67	2887.87	3954.63	4271.11	6309.23	4141.74	4232.01	7563.79	5553.91	3471.78	4069.26	3919.88	5629.73	7728.03	3095.11	5405.03	3135.55	3643.09	3626.91	5471.84	5585.17
A0A0D9QXN2	A0A0D9QXN2	A0A0D9QXN2_CHLSB	AFP		79065.8	75111.5	89598.6	67431.8	49147.7	41619.1	58083.3	51700.7	39480.9	39053.7	44541.4	48776.9	34880.3	43055.9	55937.9	112601	123031	122303	81899	87028.6	60478.9	44089.4	30814.8	47204.9	38685.9	82693.6	51743.7	55797.7	47287.4	58985.2	109787	126718	109684	58429.9	77225.7	49032.2	42662	39698.3	41004.8	86424.8	1.00E+06	331208	72477.3	49144.1	62763.3
A0A0D9QXN5	A0A0D9QXN5	A0A0D9QXN5_CHLSB	TSEN54		7380.42	4704.27	5610.91	6984.25	5793.57	6442.02	6295.09	5753.21	6279.31	5973.9	6956.4	5200.25	5829.29	5839.25	6895.52	8061.16	5420.84	6724.01	6468.83	4081.42	6357.84	6785.56	6875.35	6243.72	6628.41	6643.41	6661.45	6613.46	6979.85	6191.48	7052.63	4489.39	5703.68	6169.87	4848.61	7360.31	7296.05	5039.89	6687.36	6509.9	4073.78	6233.76	7396.47	7224.2	7254.61
A0A0D9QXN6	A0A0D9QXN6	A0A0D9QXN6_CHLSB	NUDT19		11021.5					5052.44	6827.01		8167.42	7835.49					5069.88	4510.7		4467.63	3477.18		5324.02	6438.73		5499.64	7771.53	4362.81	8043.04	5626.39		7276.05	5642.09		6162.77	5905.15		7721.19	4565.12		8675.47	4110.25	9041.59	9143.68	5374.5		6989.76
A0A0D9QXP0	A0A0D9QXP0	A0A0D9QXP0_CHLSB	NUCB2		36256.7	40331.5	38145.8	38752.3	35476.8	40145	37224.9	37474.7	38107.8	39531.6	40962.1	41404.6	40754.9	36708.5	37764.8	35168	34295.9	35034.3	38360.3	39326.3	36521.5	38972.6	37599.6	36827.9	36470.4	36205.4	31311.1	44416.9	41505.4	38526.5	40387.7	40886.7	32499.1	35874.3	40672.4	26867.8	37857.9	38812.3	30648.8	36889.7	30619	25678.3	39447.1	34363.5	34765.6
A0A0D9QXP1	A0A0D9QXP1	A0A0D9QXP1_CHLSB	NCR3LG1		1443.29			1454.53	1858.92	2245.51	2084.83			1560.96				1850.04		1397.36	1546.18	2490.8	1453.78		1226.59	1793.01	2030.39	2025.02	2005.43	1923.71			1574.08	1815.2	1564.51		2444.9	1922.95			1630.51		1990.38	1940		1678.07	1517.81
A0A0D9QXP5	A0A0D9QXP5	A0A0D9QXP5_CHLSB	DCTN2		125848	97822.4	114091	128287	117806	119208	121169	110754	125174	121386	135720	121525	128942	119571	120712	131480	100285	114568	114044	99054.9	119290	120041	123961	130018	122057	120044	119976	137668	124047	127794	124285	104636	108600	112806	100899	117323	117149	110299	125276	127365	105310	107303	145852	124028	128860
A0A0D9QXP6	A0A0D9QXP6	A0A0D9QXP6_CHLSB	ANKRD27		7128.45	4553.54	5020.45	5158.36	4708.38	7724.19	8050.77	4520.6	5422.95	6236.65	5543.05	4756.73	3421.03	4610.97	5316.61	8163.83	5466.23	8023.82	9038.29	7526.98	8705.77	5455.56	7019.04	7296.7	7818.64	8197.28	8011.86	5983.68	7151.2	5036	10605.5	11466.2	7484.91	7340.26	6629.98	3999.73	7729.64	8945.14	7093.82	7848.45	8133.73	8267.19	10557.7	7037.56	7244.47
A0A0D9QXP9	A0A0D9QXP9	A0A0D9QXP9_CHLSB	ALB		1.40E+06	989506	1.37E+06	970484	889707	892969	878536	579588	738345	572499	707309	580211	690522	861602	930138	1.64E+06	1.66E+06	1.80E+06	1.10E+06	1.00E+06	954140	715048	734572	676273	533204	1.02E+06	853591	965714	870996	1.02E+06	1.70E+06	1.78E+06	1.79E+06	934704	1.03E+06	861304	640680	567033	694141	997209	6.09E+06	2.77E+06	1.08E+06	881262	1.06E+06
A0A0D9QXQ0	A0A0D9QXQ0	A0A0D9QXQ0_CHLSB	SHTN1		18612.7	14405.6	14338	15118.1	14482.8	15076.6	15489.5	14179.5	17565.7	13812.1	16008.3	15306.6	16629.9	15495.4	16181	16779.7	13860.4	14943	15224	14263.9	15490.2	16495.7	15110.9	14710.5	16288.1	17123.6	16617.1	15586.2	14814.3	15906.5	18004.7	13982.6	14206.1	14476	15048.1	16521.4	15586.9	14161.4	16751.9	15787.2	14997.5	17272	17341.6	14575.8	16437.2
A0A0D9QXQ1	A0A0D9QXQ1	A0A0D9QXQ1_CHLSB	PDCD5		22658.5	28381.9	29312.2	27373.9	26017	21663	22134.4	24870.7	20171.7	21887.6	24263.2	21411.4	22135.8	19427.8	20280.8	22974.1	28704.5	20691.6	24122.1	27430.4	23373	19418.9	20936.4	22886	22091	19972	19823.6	20274.7	18226.9	19930.3	19857.6	26677.5	23079.3	25262.3	25878.4	22751	20838.4	24167.9	25288	21737.7	51871.5	22376	27581.7	26769.5	20632.4
A0A0D9QXQ3	A0A0D9QXQ3	A0A0D9QXQ3_CHLSB	ANKRD17		20927.2	14969.7	22738.1	19271.3	20200.4	19703.1	20137.5	17546.9	19761.2	18335.1	14730.6	17752.3	16329.5	15894.1	15512.5	18642.6	17399.2	20647.9	19957.8	17074.3	23304.3	18868.8	19731.2	19454.7	18190.4	15284.9	17308.3	16912.9	15107.2	16458.9	20286.7	16071.6	19815.2	20836.2	16713.1	18217	18109.1	15897.4	18176.2	18562.1	14234	17899.2	19667.3	16776.4	16720.9
A0A0D9QXQ3;A0A0D9RK88	A0A0D9QXQ3;A0A0D9RK88	A0A0D9QXQ3_CHLSB;A0A0D9RK88_CHLSB	ANKHD1;ANKRD17		20374.7	20449.8	20819.8	20962.3	22822.5	21791.5	17859.9	20819.2	21068	17318.2	19629.1	19755	20125.7	18542.9	17466.1	20177.1	20528.4	20985.1	18831.8	20750.6	20595	20219.6	21926.1	21049.6	16389.8	18515.2	13939.9	18218.3	16882.1	16775.8	19707.4	17177.9	17834.5	18428.6	18335.3	18948	19042.8	17029.5	17447.7	16698.2	12003.6	14700.7	15332.7	18646.3	15509.5
A0A0D9QXQ6	A0A0D9QXQ6	A0A0D9QXQ6_CHLSB	MARS1		168568	156321	176252	171375	164011	173050	165312	146926	163620	162142	172319	158638	153616	178452	167398	152897	157868	168412	158288	142038	165195	156835	157097	161548	161832	158387	162242	166178	172488	165365	161541	144319	178281	164205	162800	159323	158054	157605	155994	164799	143439	138904	156316	165406	164797
A0A0D9QXQ7	A0A0D9QXQ7	A0A0D9QXQ7_CHLSB	LLGL2		5965.27	6089.77	5793.38	4925.28	4414.71	4987.76	4768.08	5545.23	5017.56	5475.86	4921.39	5462.76	5891.16	4536.99	4225.04	5500.94	4613.91	5991.2	4836.87	6900.55	5199.89	5334.59	5520.75	5561.73	5269.32	4940.64	5306.76	4634.04	5235.52	4990.49	6012.86	5037.18	6229.07	5538.72	5233.6	5237.12	5741.45	4433.58	5301.37	5270.33	7646.07	5074.11	5451.88	4118.8	4536.69
A0A0D9QXR2	A0A0D9QXR2	A0A0D9QXR2_CHLSB	NCAPH2		5945.44	4403.05	5612.15	4546.68	6529.28	5645.88	4834.93	3160.77	4885.25	4471.98	3539.42	4014.8	4590.96	3911.79	5166.92	5150.35	5683.62	5162.49	5227.77	5069.71	5444.04	4421.94	5229.55	4777.33	5413.23	4053.52	4055.26	4192.96	4457.73	5511.88	5016.98	4106.78	6528.42	5120.34	4144.61	5108.38	5871.77	4431.58	4879.32	3705.26		4969.73	4280.31	2792.1	4644.49
A0A0D9QXR3	A0A0D9QXR3	A0A0D9QXR3_CHLSB	HSPA12A		1482.06		1703.65	1424.86		2255.8	1714.41		1420.38	1457.29			2610.58	1078.13	1403.11			2059.34			1331.76	1535.28		1654.58	2035.27		1661.1	1646.41	1974.8				1417.1	2361		1345.25	1876.44	2411.12	1811.14	1724.49		2204.04
A0A0D9QXR9	A0A0D9QXR9	A0A0D9QXR9_CHLSB	GC		104982	23791	44157	36250.5	36051.5	46610.6	57083.7	15147.5	51126	57019.5	35664.1	24454.8	33581.1	23020.3	41398.9	88425.7	43880.5	77861.1	45777.4	15949.5	67794.6	41582	31224.5	41001.3	38950.8	48582.4	62381.5	54157.7	45534.2	45913.1	113461	49247.8	94979.1	50068.3	26610.2	67675	40761.4	22689.8	51013.4	41175.8	205251	168316	54626.2	27397.4	51608.7
A0A0D9QXS4	A0A0D9QXS4	A0A0D9QXS4_CHLSB	URI1		57338.5	96204.5	81508.2	76669.4	72241.4	70573.4	61806.1	106152	55283.6	47605.3	76331.8	65973.1	62493.4	72318	62389.7	73841.6	88572	62213.5	75162.6	88768.6	62331.6	72592.8	80961	72997	54330.6		41818.4	60854.3	65631.8	63696	65516	85849.1	53019.3	63190.6	81910	49588.2	62300.9	73250.4	51504.6	52833.1	35905.3	43142.9	66072.7	69513.8	51925.7
A0A0D9QXS5	A0A0D9QXS5	A0A0D9QXS5_CHLSB	LMF2		1699.61	2179.53	1917.08	1215.7	1658.31	1677.34	3143.48	1481.97	1627.34	1627.78	2183.41	1724.15	3213.59	3328.61	3225.34	1921.83	3978.92	3995.29	1370.12	2337.04	1659.15	1061	1283.55	1594.66	2071.54		1635.73	889.44	1469.5	1522.91	1203.3	3274.1	3651.61	1468.11	1480.99	1427.88	3265.71	4045.3	1907.46	1127.27		1283.57	1331.18	1601.68	2707.03
A0A0D9QXS9	A0A0D9QXS9	A0A0D9QXS9_CHLSB	RECQL5		2154.09	1695.52	1815.47	2118.91	2426.93	2084.39	1876.82	1308.72	2057.86	1087.23	2148.23	1782.34	1753.54	2590.22	1613.61	1954.44	2572.65	1782.57	2114.14	1954.69	1667.14	2690.97	1928.27	2817.32	1807.74	1995.52	1423.92	2538.63	1747.37	1396.23	2854.76	1059.04	1576.84	2180.56	1700.77	1226.31	2373.84	1541.28	1943.49	1998.12	2404.4		1374.14	1769.6	1364.6
A0A0D9QXT0	A0A0D9QXT0	A0A0D9QXT0_CHLSB	KIFC3		3594.78	2212.65	3468.46	3462.8	2826.32	3265.57	3568.62		3543.89	3032.45	3507.29	2183.08	2693.25	2783.64	2282.35	3404.89	2227.54	2581.31	3955.05	3179.45	3439.93	4072.07	2712.63	3342.8	4682.01	4075.31	3365.64	4441.13	3679.26	3279.38	3842.3	1561.07	3449.91	3718.77	2864.31	3324.83	4880.69	3612.26	4783.98	4882.59	4397.42	4010.66	4599.54	3497.64	3488.87
A0A0D9QXT1	A0A0D9QXT1	A0A0D9QXT1_CHLSB	SAP30BP		15568	14382.5	16297.1	18007.7	15867.8	15596.3	14849.3	10648.2	14783.8	12772.9	16416.7	14715.7	15066.3	14866.8	14633.2	18824.7	15355.1	18178.7	16730.8	16319.5	17121.4	16950.4	16816.2	15398.5	14742.7	16244.2	12656.6	15231.9	14936.8	15032.1	16893.9	13091.1	14455.5	16958.2	15298.4	9912.49	14837.2	13006.7	10463.9	16001	8479.93	10323.6	16284.8	14837.1	13973.9
A0A0D9QXT2	A0A0D9QXT2	A0A0D9QXT2_CHLSB	SLC4A4		6234.97	9168.35	8411.13	6897.69	9095.17	7349.92	7906.04	9843.34	6593.68	7666.61	8660.21	8929.22	8051.2	10464.6	8990.58	7297.56	8858.38	8149.83	8035.47	9661.1	6494.22	8754.93	10991.5	8727.63	7743.46	10000.6	10476	7501.88	9863.2	6571.5	7924.32	10419.9	8224.71	8278.4	10414.5	4068.13	9643.05	14589.9	6252.25	10735.6	8747.91	9903.48	5872.47	8935.46	7332.93
A0A0D9QXT4	A0A0D9QXT4	A0A0D9QXT4_CHLSB	KATNB1		5249.96	7480.53	5912.57	2326.06	4810.55	5413.19	6351.91	6066.35	6756.57	6911.43	5407.85	5935.17	5194.01	5331.86	5557.27	4900.72	5373.16	4985.21	3683.21	7940.19	5379.94	5381.69	4832.71	6240.6	5751.82	5801.69	5934.4	5373.71	5652.07	5718.32	4644.97	2684.71	5778.87	4743.69	3581.88	6473.03	5216.04	4501.77	5245.13	5424.21	6113.38	5663.08	4784.45	4917.91	6691.35
A0A0D9QXT5	A0A0D9QXT5	A0A0D9QXT5_CHLSB	GALK1		39547	27150.4	34285.1	32139.8	31587.4	30682.7	36229.3	32792	36092.4	34138.4	36619.7	31131.6	33738.1	31092.3	34436.3	38582.4	28592.7	31377.9	33045	23554.9	34877.8	33352	30710.8	32313	34496.8	32885.9	34449.6	36158.4	30247.1	32113.5	37623.7	25260.6	31209.1	35349.8	26079.3	37558.6	31663.5	25190.3	31761	33466.4	23007.8	34130.9	36139.4	27512.5	33159.4
A0A0D9QXT6	A0A0D9QXT6	A0A0D9QXT6_CHLSB	MOB1B		13530	12579	13556	16885.3	14703.6	14314.9	9772.24	15648	12771	11478.7	16245.8	11096.9	13681.1	11424.9	10313.3	16846.2	12871.1	14586.5	14353.1	13479.3	11318	16492.4	16696	14736.7	8047.17	13287.6	8877.86	12090.5	12800.3	14614.2	15192.9	12449.4	9992.13	15010.4	16131.9	16658.1	14825.6	14179.3	10583.9	7472.92	12470.8	5061.7	13077.2	13799.9	11433.5
A0A0D9QXT6;A0A0D9S9G4	A0A0D9QXT6;A0A0D9S9G4	A0A0D9QXT6_CHLSB;A0A0D9S9G4_CHLSB	MOB1B		15746.3	16558.7	17423.6	17871.4	19227	18830.8	17140.9	21411.6	17493.3	14836	16545.8	19020.7	17917.4	17720.4	17828	17739.2	18176.6	18560.1	18679.6	17477.2	16542.3	19288.6	19361.1	20711.1	17378	15087.4	14448.5	19418.5	16871.3	18636.1	19929.7	12509.6	18638	19093.6	18194.7	14601.7	17727.2	18468.1	16965.5	16390.4	10472.7	12937.5	13581.2	15565.3	15524.6
A0A0D9QXT7	A0A0D9QXT7	A0A0D9QXT7_CHLSB	DCK		10773.9	4406.69	6621.25	5445.95	4891.79	6287.79	5892.76	5074.77	8019.13	7139.9	6041.18	5032.14	5367.71	4721.93	4547.18	7389.35	4296.65	6017.53	5292.69	3787.33	5649.99	4111.35	4879.25	5758.88	6374.48	6193.48	7988.56	4461.56	4926.44	5489.23	7003.54	4103.88	8004.83	6376.85	4770.13	7757.89	4726.99	3703.38	7096.38	5262.36	12494.7	9165.36	6539.88	4065.54	6110.31
A0A0D9QXT8	A0A0D9QXT8	A0A0D9QXT8_CHLSB	GRSF1		22689.1	20916.2	22213.8	19946.1	23738.3	22723.7	23014.4	16927.1	23233.6	20991.5	15987.6	21321.7	21255.1	21962.7	21982.6	21563.9	22208.5	24382.8	23880.4	23226.2	25840.4	23979.4	20865.3	23452.1	20642.6	20999.4	23359.2	22082.6	20428.1	22110.8	21798.5	22267.2	24192.6	22709.7	24273.5	25111.6	22079.7	20774.9	24261	20630.9	33475.1	23947.7	26094.8	25150.1	22082.2
A0A0D9QXU0	A0A0D9QXU0	A0A0D9QXU0_CHLSB	RUFY3		9056.85	4525.22	5978.56	5252.08	4765.72	5499.23	8774.25	3206.15	8697.27	8071.23	4941.64	5222.09	8759.48	4749.5	7709.52	7175.53	4576.87	7178.65	6151.53	4919.1	8434.44	9344.58	4376.83	7114.95	11136.7	9826.03	8547.69	7647.8	5560.06	8493.92	10870.6	7886.16	8781.91	6313.51	7676.77	7001.89	9790.23	3061.01	10229.8	11183.7	10119.1	10799.7	8083.62	6074.5	8554.67
A0A0D9QXU1	A0A0D9QXU1	A0A0D9QXU1_CHLSB	UNK		8971.8	4916.41	7957.11	7549.44	7809.79	7810.6	8844.69	6377.47	8757.34	8880.25	7451.89	6984.83	8838.88	6845.19	8461.19	8179.55	6956.36	7916.25	7932.21	5021.95	8284.73	9458.43	7840.35	9697.94	8047.62	7965.76	8410.13	8429.96	8516.13	9982.4	8619.48	6060.96	8033.32	8930.43	6463.65	8930.69	8975.41	6740.72	7482.66	9371.95	6741.43	7420.48	7994.74	7639.04	8777.69
A0A0D9QXU1;A0A0D9RGW5	A0A0D9QXU1;A0A0D9RGW5	A0A0D9QXU1_CHLSB;A0A0D9RGW5_CHLSB	UNK;UNKL						2344.96			2539.88		1571.07		2725.68							2036.88			2755.81	2646.61			2001.93			2702.59		2452.21				2200.43									3104.21
A0A0D9QXU6;A0A0D9RI14;A0A0D9RMH7;A0A0D9SAA1;A0A0D9SAH3;A0A0D9SAM6;A0A0D9SAU7;A0A0D9SCL0;A0A0D9SD38	A0A0D9QXU6;A0A0D9RI14;A0A0D9RMH7;A0A0D9SAA1;A0A0D9SAH3;A0A0D9SAM6;A0A0D9SAU7;A0A0D9SCL0;A0A0D9SD38	A0A0D9QXU6_CHLSB;A0A0D9RI14_CHLSB;A0A0D9RMH7_CHLSB;A0A0D9SAA1_CHLSB;A0A0D9SAH3_CHLSB;A0A0D9SAM6_CHLSB;A0A0D9SAU7_CHLSB;A0A0D9SCL0_CHLSB;A0A0D9SD38_CHLSB	H3C14		116995	101320	124206	105688	145154	145263	139811	104639	135827	90678.9	123680	117421	143337	180210	178571	111373	190451	196840	125791	129372	110541	110763	91209	99065.4	123945	120386	138439	109127	134199	129940	111373	159481	202468	117931	144003	120164	159916	187080	152081	88555	95090	93385.1	117471	133175	156451
A0A0D9QXU6;A0A0D9RI14;A0A0D9RMH7;A0A0D9SAA1;A0A0D9SAU7;A0A0D9SCL0;A0A0D9SD38;A0A0D9SD76;A0A0D9SDP1	A0A0D9QXU6;A0A0D9RI14;A0A0D9RMH7;A0A0D9SAA1;A0A0D9SAU7;A0A0D9SCL0;A0A0D9SD38;A0A0D9SD76;A0A0D9SDP1	A0A0D9QXU6_CHLSB;A0A0D9RI14_CHLSB;A0A0D9RMH7_CHLSB;A0A0D9SAA1_CHLSB;A0A0D9SAU7_CHLSB;A0A0D9SCL0_CHLSB;A0A0D9SD38_CHLSB;A0A0D9SD76_CHLSB;A0A0D9SDP1_CHLSB	H3C14		34274	42775.8	56829.4	41665.6	81894.6	80172.4	58837.8	32125.5	41610.8	30001.2	61059.5	47194.1	59294.4	121861	122499	42316.5	102265	100181	57803.5	53880.2	40976	34588.6	26508	34574.8	55591.4	57113.3	52172	22781.1	53435.1	52727.7	32867.6	73929.3	95487.3	47505.2	69341.3	38847.4	75479	79848.1	31881.3	31958.7	32219.1	29343.7	28543.5	41378.1	67935.5
A0A0D9QXU6;A0A0D9RI14;A0A0D9RMH7;A0A0D9SAA1;A0A0D9SCL0	A0A0D9QXU6;A0A0D9RI14;A0A0D9RMH7;A0A0D9SAA1;A0A0D9SCL0	A0A0D9QXU6_CHLSB;A0A0D9RI14_CHLSB;A0A0D9RMH7_CHLSB;A0A0D9SAA1_CHLSB;A0A0D9SCL0_CHLSB	H3C14		118909	126037	125660	94417.1	192406	156943	138045	124011	116230	74547.3	169914	127067	134887	258873	241951	166190	220288	222539	164135	211455	118776	103443	86916.2	97559.5	144366	205414	184476	87514.8	126794	140804	150706	302758	272014	149639	225463	135959	244371	281048	128890	122913	86624.9	107829	238344	193378	270387
A0A0D9QXU6;A0A0D9RI14;A0A0D9SAA1;A0A0D9SAM6;A0A0D9SCL0;A0A0D9SD76;A0A0D9SDP1	A0A0D9QXU6;A0A0D9RI14;A0A0D9SAA1;A0A0D9SAM6;A0A0D9SCL0;A0A0D9SD76;A0A0D9SDP1	A0A0D9QXU6_CHLSB;A0A0D9RI14_CHLSB;A0A0D9SAA1_CHLSB;A0A0D9SAM6_CHLSB;A0A0D9SCL0_CHLSB;A0A0D9SD76_CHLSB;A0A0D9SDP1_CHLSB	H3C14			3388.2			5996.27			1896.09			7402.79	6462.54	3832.53	19378.4		3790.09	9817.02	8167.5	6503.75	8267.75			2702.16			7744.72			36185.8	18880		63348.3	108569	53750.8	85280.7	9515.27	104377	162292		30718.9			112754	123998	149872
A0A0D9QXU6;A0A0D9RI14;A0A0D9SAA1;A0A0D9SAM6;A0A0D9SCL0;A0A0D9SDP1	A0A0D9QXU6;A0A0D9RI14;A0A0D9SAA1;A0A0D9SAM6;A0A0D9SCL0;A0A0D9SDP1	A0A0D9QXU6_CHLSB;A0A0D9RI14_CHLSB;A0A0D9SAA1_CHLSB;A0A0D9SAM6_CHLSB;A0A0D9SCL0_CHLSB;A0A0D9SDP1_CHLSB	H3C14		40926.9	75600.9	71507.4	46882.8	93628.4	99832.1	82338.6	58632.4	58883.6	38633.8	77980.3	62435.2	66231.5	133282	173839	80788.9	178365	199946	102263	149530	68056.7	50133.8	35326.4	54553.5	82345.2	78535.6	91958.7	43372.5	76132	67882.8	59833.2	146335	124203	52294.5	93484.2	50752.3	78204.3	106999	41511.9	28265	24963.3	33899.7	33798.3	37670.5	42469.4
A0A0D9QXU6;A0A0D9RI14;A0A0D9SAM6;A0A0D9SDP1	A0A0D9QXU6;A0A0D9RI14;A0A0D9SAM6;A0A0D9SDP1	A0A0D9QXU6_CHLSB;A0A0D9RI14_CHLSB;A0A0D9SAM6_CHLSB;A0A0D9SDP1_CHLSB			3186.12		3026.59	2759.47	3063.59	2457.14	3040.86	4550.59	3828.16	5215.41	3138.85	3150.25	2668.94	4578.98	4160.24	2061.44	2474.2	3466.16	3313.87	5542.76	3469.43	5121.7	3405.83	2725.83	3384.43	3379.1	6132.84	2488.12	4049.88	3214.51	4169.72	5921.03	4155.41	3719.59	5148.23	3909.4	4992.09	3508.89	2096.44	2474.27			2364.44		4765.7
A0A0D9QXU6;A0A0D9RMH7;A0A0D9SAA1;A0A0D9SAH3;A0A0D9SCL0	A0A0D9QXU6;A0A0D9RMH7;A0A0D9SAA1;A0A0D9SAH3;A0A0D9SCL0	A0A0D9QXU6_CHLSB;A0A0D9RMH7_CHLSB;A0A0D9SAA1_CHLSB;A0A0D9SAH3_CHLSB;A0A0D9SCL0_CHLSB	H3C14		21472.1	32044.5	36083.2	32218.6	77795.7	64032.2	39252	45494.2	32163.5	23771.3	55716.8	42773.6	54330.7	111756	85396.1	24294.7	77279.7	61361.9	36124	40726.7	25510	28592.3	24771.9	33469.7	45410.6	19165.9	22694.3	24699.5	36998.1	52261.8	40380.1	81561	96361.6	46185.1	65280.8	28648.4	88074.4	94593.9	34984.3	31900.5	10778.6	17386.6	12623.5	58491.6	96248.2
A0A0D9QXU6;A0A0D9RMH7;A0A0D9SAA1;A0A0D9SCL0;A0A0D9SD38;A0A0D9SD76;A0A0D9SDP1	A0A0D9QXU6;A0A0D9RMH7;A0A0D9SAA1;A0A0D9SCL0;A0A0D9SD38;A0A0D9SD76;A0A0D9SDP1	A0A0D9QXU6_CHLSB;A0A0D9RMH7_CHLSB;A0A0D9SAA1_CHLSB;A0A0D9SCL0_CHLSB;A0A0D9SD38_CHLSB;A0A0D9SD76_CHLSB;A0A0D9SDP1_CHLSB	H3C14		25688.3	30487.8	50142.9	25807.4	43444.6	63027.6	47309.2	25628.6	26335.6	9895.97	34246.2	22779.8	21583.1	63570.7	119690	110056	155265	165878	111678	127821	48472.7	21636.4	17079.1	17076.8	35747.3	92928	48632.9	15207.9	42752	22853.5	55674.3	237289	112362	38887.7	102504	29791.9	41713.7	85769	14326.6	17104.4	12811.2	6040.31	62790.1	35076.8	43914.7
A0A0D9QXV0	A0A0D9QXV0	A0A0D9QXV0_CHLSB	ADGRG1		22945.6	16416.7	17652.2	25220.5	20850.5	25154.6	27539.8	11219.8	17132.1	12488.4	13433.1	11064.7	8289.96	10064.5	9293.32	25084.1	19687.5	24018.4	28265.1	18988.7	28186.2	33410.8	21395.6	24581.6	22594.1	18993.8	16623.8	15946.9	13515.4	14313.7	24602.7	17845.2	24541.1	29146.6	18477.7	25566.4	30284.4	19752.4	29003.7	25818.7	19078	19769.1	20368	10562.8	15558.7
A0A0D9QXV2	A0A0D9QXV2	A0A0D9QXV2_CHLSB	SBF1		7608.11	8351.21	8175.01	7386.21	8035.68	7439.79	8488.71	9032.04	7892.34	7203.87	8582.88	8252.81	8897.97	9219.12	9574.67	7946.44	8295.47	7528.2	8223.19	8600.02	7473.42	8858.89	8740.54	8735.22	7925.48	8754.64	6438.13	7979.21	7975.48	8506.81	7685.24	8095.45	7687.65	8290.52	8920.07	6606.11	8401.03	8454.99	6419.86	8014.2	8912.37	6013.04	7664.18	8590.11	8115.44
A0A0D9QXW0	A0A0D9QXW0	A0A0D9QXW0_CHLSB	UNC13D		3833.12	8012.9	4748.38	6010.5	10737.9	10494.1	6052.56	8131.77	3401.39	4427.07	5357.29	8632.16	4981.11	8083.46	7113.44	3898.13	8410.84	7445.88	7178.02	8523.04	4206.43	4993.19	3711.24	4008.73	6472.03	4386.16	2174.12	3379.92	5074.44	5387.03	7059.56	21678.8	9665.63	9060.74	10953		13155.7	16544.9	4447.06	8260.02	4507.08	4396.3	3249.16	10302.5	14607.5
A0A0D9QXW1	A0A0D9QXW1	A0A0D9QXW1_CHLSB	PPP6R2		1953.7		1142.04	2506.64	1199.55	2103.45	1850.47		2456.23	2238.79	1561.12	1622.54		2092.57	2127.52	2729.01		2868.18	1360.61		2348.44	2666.46	1514.32	3289.64	1991.87	1235.2	2262.59		2265.65	2235.84	1737.33	1114.9	2786.86	2037.98		2058.31	2261.66	1630.05	1814.31	2170.82	692.856	2642.69	3371.14	1382.79	2290.27
A0A0D9QXW2	A0A0D9QXW2	A0A0D9QXW2_CHLSB	UQCRFS1		34702.4	27532.8	31265.3	30358.8	29273.1	34142.3	31823.4	25339.1	28617.5	31153.2	28402.7	26599.1	33128.8	31301.6	33193.2	31353.9	33135.5	38874.5	35438.9	26155	33370.6	31613.9	23586	25235.6	35619	27317.5	29228.2	32606.5	27503	31086.1	39415.4	28583.7	41673.9	38534	27295.1	38997.2	38133.4	29667.6	29842.7	32300.9	24064.5	25652.7	28041	27731.1	33295.5
A0A0D9QXX0	A0A0D9QXX0	A0A0D9QXX0_CHLSB	CCDC102A		1947.03	733.149		1236.06	1395.96	1760.75	2105.39	1954.11	1729.22	1536.93	1706.23	1767.28	2241.84	1553.1	1852.14		1635.55				1356.04	1201.57		1364.47	1668.41	1375.86	2047.12	1647.95	1617.79				1687.09	1445.84		1434.73	1951.18	1612.24	2556.89	1683.21		2006.8	2374.97		1462.56
A0A0D9QXX4	A0A0D9QXX4	A0A0D9QXX4_CHLSB	TRUB1		16562.8	10254.4	12586.1	11734.4	12317.6	12511.5	12505.9	9944.8	15078.4	12978.8	14186.4	10541.4	12242.7	12411.2	11605.5	13438.4	11279.9	13875.9	12118.5	11043.2	13270.8	11964.4	12607.5	13200.9	12493.6	11303.6	13775.5	12154.6	12955.1	13325.4	14053.7	11289	15167.8	12355	12328.9	15842.5	13272.3	12401.3	17113.6	10913.7	15241.7	12474.9	13240.2	11690.2	14448.4
A0A0D9QXX6	A0A0D9QXX6	A0A0D9QXX6_CHLSB	POLR2C		23710.3	20588.9	23428.9	23589.5	23951.4	22440.2	19182.6	16384	19051	17452.7	18893	19092.3	17467.2	17257.7	17969.2	20431.6	19984.8	21515.5	21719.2	19676.1	22594	22592.1	21107.6	21363.5	18980.5	18541.4	17060	18297.3	16596.6	19073.5	17678.4	15204.4	19985.8	21953.1	21782.8	20621.5	23027.4	20150.3	18709.5	21416.3	13542.7	16376	18005.2	17875.9	18391.1
A0A0D9QXX7	A0A0D9QXX7	A0A0D9QXX7_CHLSB	FHIP2A		2338.99	3981.1	2809.26	3577.41	3115.25	3118.23	3165.18	3109.55	2913.17	3479.94	4989.62	2670.94	3751.92	4583.77	3609.15	3157.33	3202.64	2727.31	3381.66	3411.89	3386.65	3143.62	6288.16	4711.2	4626.96	5179.47	2632.44	3941.9	6703.09	4793.28	5091.09	5388.76	4123.26	4991.23	6138.57	3214.6	4479.75	8173.67	3307.34	5370.39	4073.4	3631.43	4730.58	6720.98	6023.25
A0A0D9QXX9	A0A0D9QXX9	A0A0D9QXX9_CHLSB	ABLIM1		13690.5	10127	13620.3	11609.8	11450.9	11714.5	11742.3	13228.9	14692.3	12504.1	14002.6	12793.4	13522.7	13129	14314.5	14171.5	12902.9	12739.8	12553.3	12062.8	11531.8	13012.3	13496.1	14371	12094.4	15586.2	13157.2	14681.4	14225.6	13713.9	12188.8	11092	11299.1	12781.5	12044.9	12083.4	12824.1	11449.8	12222	12307.6	10117.4	12150.1	14721.5	13957.5	13879.2
A0A0D9QXY0	A0A0D9QXY0	A0A0D9QXY0_CHLSB	TRIM47		17263.2	11484.3	15061.7	15698.8	16301.6	15763.3	15476.4	13293.7	17347.7	17275.4	14902.6	15484.2	14236.5	15251.7	15362.5	13948.8	15654.6	15546.4	14331.5	15592	17615.9	16383.2	16165.3	14853.8	15741.2	15730.8	14571.1	13924.9	16376.5	15599.9	15046.2	12993.9	15671.8	15578.2	15560.6	19026.8	15084.5	14978.8	15692.7	13705.7	14611.7	16030.3	16786.9	15823.6	16364.7
A0A0D9QXZ1	A0A0D9QXZ1	A0A0D9QXZ1_CHLSB	COQ9		9993.39	10511	8628.47	8965.09	10843.9	9430.93	7764.44	12094.8	9407.13	9309.9	15214.9	11250.8	10918.3	11961.6	9014.34	13416.2	9725.17	10391.5	10232	12800.2	10404.6	10660.5	13261.8	12637.2	9315.54	12744.4	10374	11682.6	14346	11062.8	11124.6	13409.3	8633.05	9828.29	13446	7045.07	9943.93	14666.6	8320.19	11592.1	12152.9	10610.7	12935	16857.8	11667.1
A0A0D9QXZ2	A0A0D9QXZ2	A0A0D9QXZ2_CHLSB	MRPL38		5725.86	4412.37	5645.58	5882.07	5877.45	6259.81	6054.33	5041.14	5369	5314.71	5452	5165.89	5730.93	6446	7731.28	4691.26	5189.56	5336.51	6415.52	4775.05	6807.84	5656.26	6012.22	5708.46	6002.18	5875.22	5912.58	5798.53	6304.98	5230.21	5410.17	5005.75	6537.57	6650	5724.94	4710.96	6152.68	5302.84	5694.56	6533.86	1684.18	2833.06	3369.21	5998.47	5342.84
A0A0D9QXZ3	A0A0D9QXZ3	A0A0D9QXZ3_CHLSB	R3HDM2		1660.44			2096.69	2290.56		1979.89	1527.83	1398.5		2786.74	1742.58	2589.72	1834.52	2222.8	2242.58	1799.52	1416.3	2539.34	1805.12		1546.51	2592.37	2528.19	1962.91	2472.14	2036.32	2692	2152.92	2082.2	1728.42		1532.07	1764	1617.46	1853.31	2271.42	2253.92	1436.54	1962.05		1783.19	1815.62	2516.27	1651.83
A0A0D9QXZ5	A0A0D9QXZ5	A0A0D9QXZ5_CHLSB	CIAPIN1		15881.4	16959.2	19509.8	20191.5	19192.2	19199.4	17221.1	19179.4	18636.7	17876.8	18382.7	20211.4	17117.6	18688.1	14584.9	16652	14677.2	16033.5	18390.6	17879.3	17718.8	19046.3	22348.7	20018.6	18073.2	21127.3	17635.5	19845	17864	20097.3	16156.2	13362.9	16314.1	19301.8	20047.2	17792.2	18411.9	18641.8	17469.4	19540	17982.7	20232.6	15702.8	17022.4	15322.3
A0A0D9QY09	A0A0D9QY09	A0A0D9QY09_CHLSB	PLXNB2		15928.1	12095.1	13367	13011.4	13568.7	14327.9	15899	11478.9	15138.7	15165.4	15120.8	15023.2	14415.8	13901.9	15307.6	14776.3	12808.4	14479.7	14801	13550.5	16666.5	15443.7	14291	15395.2	16513.1	16787	16500.4	14970.1	15216.7	14810	14715.7	13565	17449.3	15035.5	13861	15030.4	16619.5	14870.1	15701.9	16390	12251.8	15428.6	17530.8	13709.3	16301
A0A0D9QY09;A0A0D9R9V4	A0A0D9QY09;A0A0D9R9V4	A0A0D9QY09_CHLSB;A0A0D9R9V4_CHLSB	PLXNB2;PLXND1		1540.78				415.288		964.605		934.716	1887.54			1008.11		908.655										2019.14		1462.15	1000.12		881.205	726.567		1156.17			500.507	557.612		701.249	1176.45		1377.21	564.602		1252.19
A0A0D9QY12	A0A0D9QY12	A0A0D9QY12_CHLSB	SHMT2		90068	89472.9	95468	85490.1	92756.6	102759	77666.2	85125.2	79195.6	78923.5	82180.8	74302.4	81034.9	85578.8	92176.8	91628.5	96811.9	98761	104524	107006	101806	87461.4	81372.1	86160.4	81360	87341.5	66888.1	82967.2	90267.6	92540.3	98169.5	91821.1	95924.1	96731	104799	78264.6	85532.1	89826.3	70875.9	83255.7	66173.9	65849.2	79495.4	94145.9	96124
A0A0D9QY12;A0A0D9R6R2	A0A0D9QY12;A0A0D9R6R2	A0A0D9QY12_CHLSB;A0A0D9R6R2_CHLSB	SHMT1;SHMT2		30274.3	17448.8	19458.9	17859.1	16984.5	23322.7	23530.6	17029.1	28418.9	31902.2	21306.6	18046.5	23452.9	18322.9	19192	20630.5	17255	20130	20473.1	15987.2	25489.4	22311.5	15835.5	19981.3	26630.9	18215.2	32738.7	23058.7	23308.8	18554	24045.8	15789.5	25665.7	23164.9	17372.5	27309.9	25946.6	23124.8	43241	22030.7	27907.5	28827.1	22656.3	21278.6	23841.3
A0A0D9QY15	A0A0D9QY15	A0A0D9QY15_CHLSB	RSPRY1		1179.65	2398.72	1218.41	1588.69	1630.63	1569.85	1346.81	1297.68	1320.69	1051.64	2000.16	1303.52	1488.33	1687.3	1770.02	644.263	2215.62	1651.38	705.407	1683.48	662.629	1227.35	1341.55	1584.13	1777.8	1306.83	1012.04	659.304	1259.68	533.893	1257.76	1603.36	993.366	993.73	1668.81	1319.81	1632.86	2148.93	1147.6	1259.57		834.862		1085.55	949.151
A0A0D9QY18	A0A0D9QY18	A0A0D9QY18_CHLSB	MAPK12		2063.95	1611.27	2149.5	2175.85	2387.94	1402.67	2267.45	2081.7	2135.82	2238.17	2947.42	1193.77	2094.06	1627.98	2237.27	2094.02	2631.47	2156.08	1976.61	1349.51	1800.86	2138.87	1445.48	2257.56	2482.84	2123.37	2591.26	1586.08	1768.19	1810.94	1771.94	1356.36	1874.58	1700.71	1750.36	2467.41	1332.22	1862.39	2412.21	1815.36			1875.9		1801.45
A0A0D9QY22	A0A0D9QY22	A0A0D9QY22_CHLSB	CPNE2		16156.7	15404	17481.2	19692.8	20609.8	19810	18239	12639	19425.2	16793.9	19202	18528.2	23086.6	20326.1	22292.8	17426.8	15936.1	20612.2	20490.4	16843	20734.6	20529.8	21428.7	21382.3	19006.2	22282.3	18299	19374.8	22595.4	21302.8	17330.2	13033.7	22651.8	20661.3	17893.3	18155.8	20751.6	18282.2	18552.8	20448.7	12197.9	12729.2	17756.5	19447.2	21172.7
A0A0D9QY25	A0A0D9QY25	A0A0D9QY25_CHLSB	ACOX1		20185.4	14599.5	16897.7	15793.6	15532	17333.5	15122.5	14707.3	16841.1	15019.8	13444.9	12755.7	15560	14807.7	14955.2	16340.4	16600.8	17725.7	16302.5	14414.5	17514.4	16951.4	15563.8	16508.1	17371.7	13165.9	13390.2	16821.5	14900.6	16379.4	16828.1	14960.3	18423.3	15807.7	16152.5	16268.7	17452.3	13990.9	15624.4	15964.7	15902.2	15647.9	14997.4	15805.4	15273.1
A0A0D9QY32	A0A0D9QY32	A0A0D9QY32_CHLSB	LRP1		6996.45	8315.31	7445.88	6616.31	6238.12	6455.03	6280.65	5943.65	5046.86	3833.64	5721.59	6477.49	3537.48	4562.03	4335.68	7264.55	7404.88	6222.44	5872.78	7437.12	5189.82	5674.18	6059.29	5847.12	5941.81	4824.54	4999.13	5260.88	4954.11	4743.5	6112.27	6950.94	6006.43	5566.82	7070.29	5028.44	6277.08	7131.95	4711.47	5557.53	5328.35	4515.81	4193.8	5696.26	4211.47
A0A0D9QY36	A0A0D9QY36	A0A0D9QY36_CHLSB	SAAL1		8612.9	5189.74	3966.14	6702.28	4680.91	5940.34	5632.37	4599.61	5983.6	6202.13	4415.89	4444.6	6923.92	4939.23	5174.94	3381.05	7656.3	5299.94	4823.63	6591.23	5197.73	6427.5	4670	5327.15	6318.56	3393.07	6018.44	6604.9	5781.93	6263.04	6708.24	12275.8	4727.61	5295.88	7358.47	3795.7	4901.55	6223.77	6050.31	6255.91			3030.92	5568.85	5635.8
A0A0D9QY53	A0A0D9QY53	A0A0D9QY53_CHLSB	SCFD2		5101.19		5411.41	6926.27	6004.95	5119.96	5971.58	6475.24	4549.37	6130.93	5400.38	7868.83	5299.57	5288.28	6103.12	4567.79	6279.23	6584.91	5920.22	5084.38	6964.61	5470.18	5611.97	6045.02	6280.25	6694.92	6663.04	6016.42	5896.31	4826.32	7347.17	5713.54	6488.36	6138.66		5328.45	5726.29	3845.56	5364.84	6868.99	7275.92	5672.77	6350.45	5836.18	8089.68
A0A0D9QY55	A0A0D9QY55	A0A0D9QY55_CHLSB	STAT6		4971.76	6116.73	6679.57	5605.78	5567.63	5258.03	5361.77	6187.21	5669.92	4113.94	4709.18	5036.35	4997.15	4631.3	4549.38	5262.9	5543.64	5873.33	4552.18	4247.99	4814	5242.96	5470.7	5130.6	5248.91	4732.32	5027.8	5337.66	5033.57	4435.88	5536.7	4728.42	5218.97	5597.87	5204.99	4773.55	5084.59	4836.19	4921.74	4681.75	4527.46	3913.29	3303.32	4639.96	4118.82
A0A0D9QY57	A0A0D9QY57	A0A0D9QY57_CHLSB	FIP1L1		12442.2	10071.5	11070.1	12048.9	13051.5	12926.9	14620.7	11168.3	15362.5	17549.7	14375.2	13165.6	13751.9	12142	14431.1	14594.4	12381.5	14210.9	13229.9	10199.9	17619.2	14758.1	12489.2	14951	15795.3	15997.8	15822.9	13534.1	14451.2	15869.5	15545.1	10333.6	16045.6	14905.3	11970.7	19732.9	13155.7	10646.5	15865	13874.6	13960.2	13393.7	16144.9	13503.5	17778.3
A0A0D9QY64	A0A0D9QY64	A0A0D9QY64_CHLSB	SRP68		55411.7	54790.8	66548	59674.3	59084.2	61082.7	55104.4	50691.1	49704.7	49732.3	54952.3	51564.5	52117.4	55154.6	56567.1	56751.3	60483.4	56035.1	63392.3	51509	55870.6	58284	56280.2	57255.4	50011.9	55054.9	48370.9	51812.5	57149.2	52411.8	60628.6	55261.5	60021.9	63374	59158.3	52770.4	58822.2	52873.6	45037.5	58904.5	37486.9	45658.4	46040.1	53366.7	51952.4
A0A0D9QY65	A0A0D9QY65	A0A0D9QY65_CHLSB	NEMP1							2875.41	3772.82			2928.38			2657.86	2197.46	3042.84	2619.47	2521.33	2984.79			2903.54				3397.66	2632.55	2914.38				2495.68	2240.22	3935.21		2291.9	3449.84		2888.51	2772.56			2759.25	2578.34
A0A0D9QY66	A0A0D9QY66	A0A0D9QY66_CHLSB	HDAC10		3633.48			2069.07	1860.33	2355.58	2581.95		2984.27	2856.64	2057.28	2469.68	1959.62	1801.37	3143.77	2876.31		3005.09	3236.18		2917.36	1769.57		2289.39	2829.11		3224.3	3037.4	2095.78	3457.83	3444.76		3567.77	3820.92	2506.34	2504	2358.88		2770.93	2723.85		2830.74	3695.61	2478.74	3181.34
A0A0D9QY69	A0A0D9QY69	A0A0D9QY69_CHLSB	NUP93		68099.1	46338.3	54690.6	55621.9	53099.8	58109.3	62650.5	52777.4	60630.4	65102.1	52979.3	49418.9	56539.1	56176.6	57707.6	50029	52599.9	55484.3	53775.5	46470.3	59644.8	59340.4	47691.2	52719.2	63373.8	47850.9	59879.7	54335.3	49606	58732.2	55543.5	44604	57151.6	57458.7	51121.2	65859.6	60921.5	44526.2	62047.4	58160	45616.6	53143.6	48976.3	48248.1	54387
A0A0D9QY70;A0A0D9QY74;A0A0D9QY88;A0A0D9R1K1;A0A0D9R6T2;A0A0D9RGX9;A0A0D9RMI9;A0A0D9RZF0;A0A0D9R4V9;A0A0D9RZF3	A0A0D9QY70;A0A0D9QY74;A0A0D9QY88;A0A0D9R1K1;A0A0D9R6T2;A0A0D9RGX9;A0A0D9RMI9;A0A0D9RZF0;A0A0D9R4V9;A0A0D9RZF3	A0A0D9QY70_CHLSB;A0A0D9QY74_CHLSB;A0A0D9QY88_CHLSB;A0A0D9R1K1_CHLSB;A0A0D9R4V9_CHLSB;A0A0D9R6T2_CHLSB;A0A0D9RGX9_CHLSB;A0A0D9RMI9_CHLSB;A0A0D9RZF0_CHLSB;A0A0D9RZF3_CHLSB	FLT1;FLT3;FLT4;KDR;KIT;MAPK1;MAPK3;NLK;PDGFRA;PDGFRB				10782.9	8373.25			10103.2		7266.63	13008.5	33875.7			16178.2	4181.71	14854.5	5045.5	7432.22		13199.3	12557.3	5257.74	15960.5		8417.11	9571.34	20415.4	21486.6	16114.9					11249.2	14806.8	18431.8	18606.4	20494.1	15737.5	27188.7	30412.1	42617.1		22321.9	5882.33
A0A0D9QY72;A0A0D9RI00	A0A0D9QY72;A0A0D9RI00	A0A0D9QY72_CHLSB;A0A0D9RI00_CHLSB	MYO1A;MYO1B		13811.1	18447	18221.8	17752	18445.4	17316.4	24408.4	25097.7	22003.6	18775.6	17448.7	20911.4	25159.8	25512.7	25912.6	14809.7	17800.3	19534	16185	15767.8	18670.1	18587.9	23681.8	24448.3	20856.1	15684.1	16551.8	15237.2	19779.7	24198.8	12573.2	16944	17950.8	16827.2	17442	17255.1	18006.6	21465.2	17906.4	21619.4	12622.5	16854.8	15388	21758.4	22030.4
A0A0D9QY73;A0A0D9QY80;A0A0D9QYA1;A0A0D9QYF6;A0A0D9QYI0	A0A0D9QY73;A0A0D9QY80;A0A0D9QYA1;A0A0D9QYF6;A0A0D9QYI0	A0A0D9QY73_CHLSB;A0A0D9QY80_CHLSB;A0A0D9QYA1_CHLSB;A0A0D9QYF6_CHLSB;A0A0D9QYI0_CHLSB	MT1X		4394.22	20657.4		9398.32	3952.19	4043.91	4049.72	16012.5			4564.39	12273.3	3585.59	2555.83	2259.96	3555.67	11026.8		5427.52	7577.9		4660.87	4978.63	3679.56		3521.18		7303.39	4171.1		9109.3	27895.5	21661.4	26041.6	25288.2	6465.91	16931.6	20591.3		21552.7		5886.02	37797.4	15591.3	20686.5
A0A0D9QY73;A0A0D9QYF4;A0A0D9QYA1;A0A0D9QYC1;A0A0D9QYE8;A0A0D9QYF6;A0A0D9QYG2;A0A0D9QYI0	A0A0D9QY73;A0A0D9QYF4;A0A0D9QYA1;A0A0D9QYC1;A0A0D9QYE8;A0A0D9QYF6;A0A0D9QYG2;A0A0D9QYI0	A0A0D9QY73_CHLSB;A0A0D9QYA1_CHLSB;A0A0D9QYC1_CHLSB;A0A0D9QYE8_CHLSB;A0A0D9QYF4_CHLSB;A0A0D9QYF6_CHLSB;A0A0D9QYG2_CHLSB;A0A0D9QYI0_CHLSB	MT1B;MT1F;MT1X		215072	159826	175251	230871	176955	172092	236970	171232	173223	201081	157871	159602	194297	148364	161020	233209	161406	182178	226845	178979	186535	224386	169671	186042	212195	169396	182240	194075	148673	164021	249913	163894	181821	238389	183535	224532	214676	162536	201195	220260	205635	206429	199439	153939	174727
A0A0D9QY73;A0A0D9QYF4;A0A0D9QYA1;A0A0D9QYE8;A0A0D9QYF6;A0A0D9QYG2;A0A0D9QYI0	A0A0D9QY73;A0A0D9QYF4;A0A0D9QYA1;A0A0D9QYE8;A0A0D9QYF6;A0A0D9QYG2;A0A0D9QYI0	A0A0D9QY73_CHLSB;A0A0D9QYA1_CHLSB;A0A0D9QYE8_CHLSB;A0A0D9QYF4_CHLSB;A0A0D9QYF6_CHLSB;A0A0D9QYG2_CHLSB;A0A0D9QYI0_CHLSB	MT1B;MT1F;MT1X			2423.62	2215.81		2868.91				1796.02	2714.89		853.628	1670.68	2818.47		2682.28	2000.45	893.876	2592.02	2892.73			3165.94		4331.18				3130.28	2349.19		3017.8	2489.35	2537.87	2009.87			3032.91		3689.91			3058.71	2991.98	1336.42
A0A0D9QY76	A0A0D9QY76	A0A0D9QY76_CHLSB	HPS5		8271.78	7550.65	8000.02	7990.2	9520.13	9263.94	7046.19	6658.53	6000.46	6823.16	4681.12	6648.95	6525.25	7611.33	6622.13	7939.96	8595.44	8024.43	8557.69	6551.74	7798.84	8877.96	7886.58	6969.72	6655.65	8367.73	7953.27	7240.11	7719.53	6932.84	5859.61	7978.27	7772.39	7869.42	10287	5584.03	7761.51	11036.8	6350.37	6248.69	8923.71	6238.97	5761.28	8303.36	8100.27
A0A0D9QY79	A0A0D9QY79	A0A0D9QY79_CHLSB	EXOC7		15292.7	12920.8	13977.5	13380.5	12148.6	13533.4	12786.6	10017.2	11030.1	12512.8	12447.7	11119.8	13199.5	13073.8	12785.1	13387.6	12343.5	13896.5	13574.2	12033.7	13818.5	13777.3	12782.9	12645.4	13801.8	14369	13325.4	13381	13197.5	12938.2	14644.2	12426.5	13958.8	15475.8	12359.9	13068.2	13910.8	11968.9	12248	13907.6	11473.2	13021.3	13087.4	12456	12067.2
A0A0D9QY89	A0A0D9QY89	A0A0D9QY89_CHLSB	GTF2H1		4041.95	3846.85	3873.02	4054.25	3685.41	4120.86	4148.28	3189.3	3807.44	4705.59	3863.12	4040.29	4014.39	3211.45	4702.94	4544.36	4553.83	4569.28	4848.41	4681.62	4826.77	3916.54	4197.04	3785.09	4915.15	5428.99	4327.71	4580	3964.66	4092.38	4219.6	4396.34	4298.32	4863.5	4044.44	3709.32	3334.81	4193.16	3769.11	5522.53	12056	5574.83	4173.26	3484.55	4035.66
A0A0D9QY94	A0A0D9QY94	A0A0D9QY94_CHLSB			218081	159696	173750	206323	185313	211534	246829	228671	232053	272233	254629	253230	262473	217183	225610	183078	175910	220452	193511	195572	216065	226971	236469	252261	261575	216212	247446	246983	214478	227086	216205	159073	185576	216390	153418	161592	222556	188226	231612	269573	242339	227358	181443	191214	210249
A0A0D9QY94;A0A0D9QYC9;A0A0D9QYD0;A0A0D9R6G5;A0A0D9RUA5	A0A0D9QY94;A0A0D9QYC9;A0A0D9QYD0;A0A0D9R6G5;A0A0D9RUA5	A0A0D9QY94_CHLSB;A0A0D9QYC9_CHLSB;A0A0D9QYD0_CHLSB;A0A0D9R6G5_CHLSB;A0A0D9RUA5_CHLSB	LDHAL6A;LDHC		133288	39271.5	121641	143221	158265	173781	202046	92307.3	196626	208146	155457	120960	181622	127264	203433	181093	140085	163125	179999	58615.4	191596	209763	185536	182738	214225	187192	242051	190743	187044	199054	191388	92453.6	166564	194443	161644	214527	192436	146940	191884	221790	213364	199400	184100	149659	195289
A0A0D9QY94;A0A0D9R6G5;A0A0D9RUA5	A0A0D9QY94;A0A0D9R6G5;A0A0D9RUA5	A0A0D9QY94_CHLSB;A0A0D9R6G5_CHLSB;A0A0D9RUA5_CHLSB			117739		21813	26299.2	61652.4	103314	208089	13382	207257	230394		20974	79396.9	13264	141915	69508.9	17417.7	126227	48908.7	9930.46	149207	82108.5	45108.2	66391	195782	156286	289959	47970.8	79912.4	125204	91120.4	10227.6	188108	104213	23208.1	276308	69329.3	11779	242078	155680	277415	350565	127470	15156.1	130914
A0A0D9QY94;A0A0D9RJ43	A0A0D9QY94;A0A0D9RJ43	A0A0D9QY94_CHLSB;A0A0D9RJ43_CHLSB			27516.9	27019	20346.8	17116.7	25410.3	22824.4	26081	20071	17009.6	40222.1	22250.4	19767.8	15970.8	13911.4	18414.1	18380.9	25861.5	22051.7	30823.5	15119.2	22450.2	30471.8	18623.5	21097.2	29614.3	22910.3	34004.9	42936.5	23824.1	31286.1	42571.6	17968.6	28566.9	25771.7	19789.9	29327.5	44787.2	20546.4	23280.7	38441.4		27374	36423.8	33422.2	26383.2
A0A0D9QY94;A0A0D9RJ43;A0A0D9RUA5	A0A0D9QY94;A0A0D9RJ43;A0A0D9RUA5	A0A0D9QY94_CHLSB;A0A0D9RJ43_CHLSB;A0A0D9RUA5_CHLSB			133197	53872.5	96472.1	140183	124914	124169	157028	53751	173203	178711	75718.6	82626.5	114551	91908.9	100604	77426.2	86336.8	87326.2	87227.8	49176	118414	152994	134761	154969	138696	66476.8	130154	162208	94169.3	145420	132249	54805.1	125561	117320	82752.6	148767	144791	58120.2	250164	111535	174448	165016	59670.2	64581.5	82722.6
A0A0D9QY94;A0A0D9RUA5	A0A0D9QY94;A0A0D9RUA5	A0A0D9QY94_CHLSB;A0A0D9RUA5_CHLSB			166631	234192	217203	197579	187957	215829	271437	220773	244274	280825	192708	215312	223575	184022	233530	282720	200402	249876	247372	176389	234856	271083	245487	224977	282519	369906	309033	242998	285890	228636	244607	182637	242400	283449	231253	269342	260292	233202	221278	330323	253341	297673	361282	243617	278474
A0A0D9QY96	A0A0D9QY96	A0A0D9QY96_CHLSB	TMEM165			1378.77	1585.74	1312.6	1156.49	1363.44	1486.89		1275.16	771.713		968.608					1457.25	1769.87	1387.07			1129.97	1525.26	1123.26	1230.6		813.107		1156.88	986.942		1509.26	1824.72	1244.63	1414.8	1623.42	610.062	1609.87		1131.63		1239.13		1133.37
A0A0D9QY97	A0A0D9QY97	A0A0D9QY97_CHLSB			16666.8	13302.1	17058.7	15920.3	17335.1	17656.8	21262	19851.8	17046.2	16240.3	14561.3	16961.8	13963.2	15430.3	15816.9	18420.6	17873.3	17887	17413.4	20333	18815.6	19928	16641.1	18272.5	15953.1	17526.7	14768.8	16409.9	19151.3	15512.2	21077.5	19198.9	21219.9	20942.7	23108.1	14777.6	19307.2	18145	15241.4	19300.4	14916.3	14183.8	13743.9	16678.1	16463
A0A0D9QYA3	A0A0D9QYA3	A0A0D9QYA3_CHLSB			123424	134263	151729	145898	126882	143718	118394	115174	145182	146009	131283	110070	108511	136465	124107	159225	132260	134474	142350	127260	131045	128273	124848	113788	128704	150120	161993	123007	113775	122541	142834	126428	167689	125647	143890	177507	117944	113152	148499	115918	163501	237821	159095	114852	126307
A0A0D9QYA8	A0A0D9QYA8	A0A0D9QYA8_CHLSB	TUBGCP6		15404.3	14714	22225.9	19110.4	21671.6	18074.3	22016.7	15713.3	16740.7	16207.1	18095.1	20717	20909.9	20476.8	26120.3	19869.9	28248.8	25918.3	22611.9	25780.8	17138.8	17162.6	19151.6	19341.3	13995.2	14740.4	23895.9	20360.4	20284.5	17798.7	25660.6	26765.2	20355.1	20958.2	21616.5	10035.1	15599.7	17727.2	9261.32	19585	18119.9	11080.3	15753.9	18233.4	17431.8
A0A0D9QYB1	A0A0D9QYB1	A0A0D9QYB1_CHLSB	ATP5F1B		540361	381346	476417	439860	440406	484965	451357	389969	528918	472495	428752	391241	483321	463183	522452	502520	427330	541661	481783	435296	560727	491998	399970	477388	481041	512819	524106	521909	493496	526758	568775	468466	503061	528601	485164	564575	486477	424542	524308	496096	450790	451641	652920	490354	560785
A0A0D9QYB4	A0A0D9QYB4	A0A0D9QYB4_CHLSB	SELENOO		9473.54	6787.23	9843.54	9026.38	10807	10899.2	9952.32	11296.6	9177.13	9807.45	9349.58	7624.07	9953.72	10710.8	10921.8	9956.41	10281.1	9178.09	8710.54	7102.82	9958.46	11144.5	9888.62	9607.02	11983.6	8976.81	8772.57	10435.8	9158.95	10680.7	8422.94	10422.6	10752.4	10702.5	9893.09	10937.3	10709.9	12703.4	9498.59	11333.4	10352	8402.75	11165	10898.6	10902.4
A0A0D9QYB5	A0A0D9QYB5	A0A0D9QYB5_CHLSB	BAZ2A		4876.86	3669.78	4305.22	3732.42	4428	4813.73	6476.05	4344.5	5722.57	4426.09	3462.98	5516.4	5326.63	6344.12	4696.72	6008.25	5927.33	6566.2	5831.71	5052.85	6797.55	4536.05	4848.9	6105.02	6227.08	5675.05	6492.84	4546.02	5123.49	3484.48	4569.26	6097.14	6625.25	4815.41	4499.36	5629.64	5834.73	4007.2	5463.77	4143.16	5818.4	5163.34	5964.5	5165.61	5613.61
A0A0D9QYB6	A0A0D9QYB6	A0A0D9QYB6_CHLSB	TRABD			3198.96	2860.6	2415.19	2735.97		2805.68	2414.41	1517.87	2204.91		2936.16	2418.85	3601.52	3364.71	2517.3	3260.63	3587.82	2049.15	2313.13	1832.73	2276.17	2532.52	2217.31	2158.05	3753.46	3410.52			961.543	2720.45	2506.41	2949.58				2834.22	4663.85			2292.93	1758.44		2593.13	3103.71
A0A0D9QYB7	A0A0D9QYB7	A0A0D9QYB7_CHLSB	PRPSAP1		45326.7	36342.3	42562.7	41896.3	41947.6	39894.8	47114.3	42675.2	44859.6	47087.3	42268.5	41512.6	45741.3	42626.2	44839.1	42692.5	36888.5	39415.3	45281.3	40868.3	44210.7	47181.4	43163.6	45064.9	46191	40874.8	41764.4	45595.4	44680.6	42584.5	40298.2	41134.7	42761.4	43314.4	41458.6	42016.7	42252.8	42316.8	42756.8	45784.5	36356.6	40463.1	46172.5	40856.5	42103.3
A0A0D9QYC3	A0A0D9QYC3	A0A0D9QYC3_CHLSB	EXOC1		11368	11935.5	10924.8	12173.2	11452.2	11941.7	11376.3	13316.4	10614.6	12394.3	13476.9	14631.9	11809.1	14480.4	12294	11382.8	12448.7	9874.92	11997.3	15563.3	11108.7	12703.3	13056.2	11818.4	11670.4	12407.7	9917.06	12038.1	13281.8	11034.6	9406.36	12573.2	9688.38	11705	11372.3	7407.32	12783.2	12385.3	12498.9	13185.3	13930	9183.91	11767.3	15749.7	11440.7
A0A0D9QYD3	A0A0D9QYD3	A0A0D9QYD3_CHLSB	UBE2O		18678	17177.9	17880.5	19024	18649	17731.1	20045	18855.3	20280.8	20599.6	18659.9	17740.5	20146.6	18741.9	20788.1	18067.8	18378.9	17719.7	18764.2	18348	19149.8	18111.5	20839.8	19601.1	21281.1	19895.4	19860.3	19847.9	20054.4	20570.6	17870	18203.6	18243.8	18533.9	18704	17088.2	21202	20224.4	18186.2	20637.9	19426.3	19522.9	21041.5	20469.5	21040.2
A0A0D9QYD5	A0A0D9QYD5	A0A0D9QYD5_CHLSB	TSG101		24235.5	17263.6	22341.1	25046.2	21553.2	23210.9	24954.8	16430.3	19390.4	18530.6	22376.5	20870.7	17234.5	16075.2	19218.7	24790	20536.9	22258.6	26678.1	25147.8	25123.4	21604.3	20587.2	23485.9	22869.6	21492.4	19815.7	20430.2	21129.8	18240.4	23385.1	24962.3	21282.3	25621.7	24857.9	19355	23633.9	19827.8	19211.3	21798.6	16140	22738.6	22350.7	22925.5	19370.6
A0A0D9QYD9	A0A0D9QYD9	A0A0D9QYD9_CHLSB	UEVLD		5125.53		5479.42	5248.64	4843.48	4483.47	4423.9	4346.17	5090.29	3767.29	6066.03	3265.44	5316.48	5907.54	4097.5	5264.96	5007.51	4203.64	4995.15	5784.81	3766.43	4245.82	5247.95	4529.99	3686.45	4692.69	5324.53	4649.62	3666.52	3786.03	4853.53	4911.15	4705.06	4188.26	4775.22	4430.73	3503.01		5014.66	4108.57	8892.15	4995.1	4948.33	5616.11	3742.15
A0A0D9QYE0	A0A0D9QYE0	A0A0D9QYE0_CHLSB	SPTY2D1				604.116	713.469	608.238	491.075	1138	993.164	763.175		429.655	483.93	785.094	621.718			2089.37	1419.34	868.274	719.14	545.086	522.762		535.085	727.611	557.057	1078.75	436.671			821.352	1255.99	1510.83		900.867	855.26	1134.44	1267.27	1036.73				703.535	685.631	605.057
A0A0D9QYE1	A0A0D9QYE1	A0A0D9QYE1_CHLSB	RHBDF2					449.763			491.832				315.523	151.057						276.861	312.279						485.656	586.271	419.495						788.329	862.2	307.006			624.428		151.686
A0A0D9QYE2	A0A0D9QYE2	A0A0D9QYE2_CHLSB	ATP13A1		6633	6136.68	7020.99	4471.69	6505.04	6293.83	10041.9	5857.46	6153.05	5964.84	2613.7	3719.41	8204.35	8940.1	9211.69	6216.17	9649.38	11486.9	6785.78	6104.64	5682.32	6098.32	5309.68	5948.16	7041.39	6842.51	6499.15	4035.49	5199.49	6328.12	6772.35	7915.56	14694.8	7030.16	5955.27	7972.61	10144	8337.12	7435.79	6899.7	5851.17	7608.34	5714.6	5253.06	8349.66
A0A0D9QYE6	A0A0D9QYE6	A0A0D9QYE6_CHLSB	PPAT		18229.5	23111.5	18222.2	18336.5	22474.7	22102.2	18997.7	21679.2	17623.3	17375.2	21331.9	22315.8	18422.1	22096.1	18791.1	23366.7	19749.4	21702.9	21446.4	20543.8	20728.4	20030.6	19898.8	20424.9	18237.7	19744.1	20034.7	20799.8	20141.2	21526.8	19979.9	16844.8	19144.7	20257	21191.4	16115.7	18001.5	18355	16111.5	18651.6	10452.6	16848.7	21085.7	22075.1	20557.8
A0A0D9QYE7	A0A0D9QYE7	A0A0D9QYE7_CHLSB	GMIP		5862.52	7388.61	9976.01	4776.68	4519.25	5571.27	7881.33	5984.84	7273.31	7130.3	5817.07	10561.1	6795.59	5717.12	7842	5841.6	5844.95	5343.86	6601.75	6595.08	6571.02	7204.62	6479.17	6480.34	7561.48	7086.97	6678.14	8537.52	6914.16	6271.46	7398.83	4598.57	6447.17	6811.25	4551.32	5578.18	7151.18	5035.8	5703.1	7574.79		5596.56	5900.2	6761.76	6614.28
A0A0D9QYF0	A0A0D9QYF0	A0A0D9QYF0_CHLSB	SRP72		27260.1	28047.9	31223.2	29029.7	27593.3	26709.7	27953.6	28974.6	28153.4	29912.3	28376.4	29074.8	30949.6	32879.3	28670	29880.8	26059.8	27176.7	27054.5	25960.6	27346.2	29142.6	32881.4	29637.5	26285.1	30658.8	29386.6	30788.1	31019.4	29670.3	27617.3	27011.7	27416.9	28578.1	29025.1	26014.3	28437.5	26157	24958.2	29217.2	34678.3	28026.9	27031.1	32438.9	29406.5
A0A0D9QYF4	A0A0D9QYF4	A0A0D9QYF4_CHLSB	MT1F		4483.86	1776.28	2107.43	5204.47	3441.85	4385.36	5243.84	2140.32	6296.13	8454.18	1032.7	4502.52	4776.06	1419.9	3379.85	5292.73	1997.91	3940.98	4320.27	2447.96	5067.29	3850.93	2078.46	3730.42	2728.36	5785.55	7200.59	1613.17	1771.2	1233.9		1940.86	5568.73	5692.08	2840.75	4806.64	3596.28	1610.48	2247.47	4084.61	2507.39	3508.33	7674.61	1334.62	2553.02
A0A0D9QYF5	A0A0D9QYF5	A0A0D9QYF5_CHLSB	ZDHHC13					6300.24					2317.94											4248.41				1487.65			2744.48						1953.02			5288.23			3464.37			7573.02
A0A0D9QYF6	A0A0D9QYF6	A0A0D9QYF6_CHLSB			14775.2	8503.27	17424.3	13086	25793.7	22977.7	22101.4	21800.2	21893.9	25695.7	23579	25708.6	29870.8	13809.6	19178	25122.8	19838.7	22379.7	28221.9	13099.7	23397.4	26316.5	18330.2	23562.6	23051.5	27555.6	23102	26669.1	14627.1	21819.2	23513.2	12191.7	19223.2	27257.8	14449.2	19621.6	21808.3	12755.3	21148.7	28115	5419.81	9303.8	28578.5	21058.2	14593.9
A0A0D9QYF8	A0A0D9QYF8	A0A0D9QYF8_CHLSB	RBMS2		11193	8470.65	10873.4	8682.91	10925.1	9179.63	13900.4	10233.9	14829.9	14382.6	11127.2	11063.4	10730.6	10906.5	11134.2	10923.3	8921.35	10794.5	10582	8967.46	12324.5	10238.8	11746	12282.8	14160.1	14590.6	14744.1	11634.4	12593.3	14615.8	11069.4	8382.14	11650.4	10827.8	9323.09	11876.7	11601.1	11267.8	15624	14115.4	10286.1	14952	22004.2	16239.4	19716.4
A0A0D9QYF9	A0A0D9QYF9	A0A0D9QYF9_CHLSB	NDUFA13		36377.2	23193.7	28436.6	24378	24436.5	31293.1	34653.4	12629.3	18830.1	19563.9	11372.5	13954.2	18363.7	15616.6	26233.2	31966.6	42588	46759.8	39553.8	27576.1	32587.9	26655.7	15480.8	19230.8	33786.6	19885.7	21022.2	17545.4	17789.9	10302.2	31179.1	33247.9	50453.7	37359.2	22607.1	19088.6	41801.4	27593	21992.4	31602.7	14017.6	16467.9	18117.8	15559.6	21937.7
A0A0D9QYG0	A0A0D9QYG0	A0A0D9QYG0_CHLSB	SPRYD4		5520.24		7277.29	7949.48	7171.71	8192.34	5507.7	5594.51	6768	4979.36	4801.13	6437.12	6452.72	5199.35	6517.27	5988.44	6490.75	5988.09	6838	5784.18	6216.46	8233.38	5247.92	6242.7	6762.58	6258.05	4681.24	7011.91	7174.62	6976.33	8043.01	5200.21	6356.98	9653.5	6097.02	5611.32	8987.87	6633.68	5428.18	7047.45		7359.58	3909.75	6792.36	7006.17
A0A0D9QYG2	A0A0D9QYG2	A0A0D9QYG2_CHLSB	MT1B		72465.2	21006.2	32433.4	43739.5	36192.3	41331.1	30239.9	24945.1	32585.4	29847.7			27354.9	9049.73	26967.8	59395.1	28886.3	27914.6	50373.3	30512.9	28852.7	41054	32890.7	27129.1	29932.1	21717.7	23003.8	25945.1	21082.7	22189.6	27870.4	26621.1	21343.2	33297.8	37415.6	20615.8	30081.1	24404.2	21561.7	29478.2	8357.81	13733.9	35546.1	17123.5	21110.6
A0A0D9QYG4	A0A0D9QYG4	A0A0D9QYG4_CHLSB	CCDC186		728.669	891.703	930.027	394.864	1002.72	1132.47	798.303	400.203	555.237	385.582		205.026	366.36	434.096	484.869		541.755	697.742	656.752	658.059	863.577	739.734	730.464	507.94	776.842	1130.51	791.709	598.253	723.913	521.229	758.228	531.341	966.535		508.801	469.79		530.224			546.388	402.487	956.388	878.839	374.849
A0A0D9QYG6	A0A0D9QYG6	A0A0D9QYG6_CHLSB	NHLRC2		12090.1	11205.8	10028.8	10272	10540.5	10503.4	11436.1	13997.9	13826.4	12965.6	10067.7	12245.5	12036.6	9287.12	11389.8	11364.8	10371.5	11682.3	10934.2	11861.3	12804.4	9870.51	10641	10849.8	13442.8	11996.6	13766.5	11082.9	10277	12723.3	11931	10422.5	12250.7	10090.7	8701.33	13988.6	10716.4	10566.3	17142.3	11265.7	18564.3	16368.2	13578.5	11600.7	12624.4
A0A0D9QYH3	A0A0D9QYH3	A0A0D9QYH3_CHLSB	TIMELESS		8453.15	18996	12949.1	14650.6	15246.7	14083.2	10723.3	14694.2	8989.91	8104.52	12281.8	12894.7	9173.17	10875.9	12719.1	14678.9	15214.8	10896.5	11243.8	15824.6	11832.3	11916.9	11599.7	13088.4	8522.21	14283.7	7976.36	10289.7	10176.1	8072.39	12086.5	13484.6	10480.7	14064.4	12598.7	8544.05	10957	13929.9	8455.32	11637	11154.4	7521.89	11410.9	10842.7	8429.21
A0A0D9QYH8	A0A0D9QYH8	A0A0D9QYH8_CHLSB	GATAD2A		16661.6	13408.9	17100.3	16703.9	15510.3	16817.2	17219.4	12322.2	17040.4	13556.4	12477	12243.9	12953.9	11954.3	12630.5	16918.2	15435.1	18094.9	16047.1	13629.9	18735.4	17753.9	17721.8	17730.8	14368	15418.2	15462.1	14506.8	12589.8	13769.9	17248.4	13332.7	17725.8	18161.5	16841.4	18413.3	15826.1	14721	18663.9	15726.4	15287.1	15499.1	16664	13257.9	15176.4
A0A0D9QYH8;A0A0D9S5L0	A0A0D9QYH8;A0A0D9S5L0	A0A0D9QYH8_CHLSB;A0A0D9S5L0_CHLSB	GATAD2A;GATAD2B		8133.95	5972.33	8411.77	7037.63	7474.78	7230.53	6564.18	6351.67	6432.28	6307.1	7528.88	7617.88	6798.97	7564.45	6982.52	6334.94	6864.9	6134.91	7934.78	8327.12	7391.99	8029.07	9228.53	8182.52	6843.24	6667.18	7524.34	8672.08	6360.74	8043.5	6218.25	7733.45	6156.92	6750.01	8079.71	6132.08	7343.85	8159.38	6464.79	8218.36	2967.92	4259.57	8210.15	9409.11	7404.8
A0A0D9QYH9	A0A0D9QYH9	A0A0D9QYH9_CHLSB	CASP7		17093	20566.3	17388.3	18140	19212.9	17887.2	15395.8	21354.7	17000.6	14430.3	19069.5	19842.4	16719.7	19725.8	17088.6	17043.7	18572.1	15214.7	17562.7	17723	15944.3	17952.7	19065.2	20461.1	15788.5	17449.7	16847.1	18787.8	17502.1	17960.3	16279.4	20054.9	13923.7	17137.6	16389.7	14196.8	19240.7	17583.4	16217.2	17924.5	18471.4	16561.4	13830.2	19634.1	16235
A0A0D9QYI0	A0A0D9QYI0	A0A0D9QYI0_CHLSB			63646.3	20049.6	41293.2	56552	44343.6	46845.9	47103.9	22874.7	26683.4	36701	19197.1	30310.4	39355.9	14509.2	52753.7	69491.4	29855.9	48362.8	55430.1	41228.6	54576.2	44569.3	29722.6	36158.1	29472.9	27607.3	27872.5	42800.2	18808.7	16073.5	48619	20867.8	43319.5	71354.2	37990.6	35177.4	41941.4	26293.2	23369.7	37975	29645.4	15520.8	41730.7	23731.9	25041.1
A0A0D9QYI1	A0A0D9QYI1	A0A0D9QYI1_CHLSB	MXRA7		3684.94	10658.3	10969.4	8238.01	6693.6	10710.4	11192.9	10746.3	8737.62	10090.6	8603.67	13182.9	9955.35	11272.2	8580.5	4928.62	8681.58	10371.3	6918.39	8396.36	8362.53	8139.86	11719.8	8049.45	7296.47	11703.9	6729.51	6476.37	8119.54	10671.6	6053.59	7795.99	8236.87	6214.41	5735.87	9089.86	9444.16	8366.68	9215.06	6887.9	2257.36	1746.65	2937.02	11151.8	12202.2
A0A0D9QYI2	A0A0D9QYI2	A0A0D9QYI2_CHLSB	MAU2		973.065					1466.52			1448.47	1635.5				1910.06	1900.55	1460.23	1213.7	1209.26			1787.38	1488.92	1942.38	1153.34	1356.82		1364.3		1861.25	2575.79	2017.23			2255.85	1757.75	1690.76	2125.7		1534.56	2190.39				1698.91	1987.44
A0A0D9QYI5	A0A0D9QYI5	A0A0D9QYI5_CHLSB	JMJD6		12751.7	14592.6	11162.5	12779.1	11356.8	10850.9	11781.5	13292.1	11983.9	12232.2	13257.8	14218.4	11356.3	11839.5	11878.9	11669.5	12004	11347.9	12127.5	10831.3	11717.2	11826.2	12665	12011.8	11958.4	10083.7	12636.8	12841.7	11396.8	11930.9	10146.2	10567.8	13052.6	12021	11450.5	10327.4	10743	14128.8	11711.2	12281.1	10010.4	10136.3	13628.1	12888.9	12981.1
A0A0D9QYI8	A0A0D9QYI8	A0A0D9QYI8_CHLSB	NAV2			599.815	1385.4	905.511		947.723			382.766			889.191	418.188			423.144	800.999		777.88		545.199		756.63	505.651		581.889			572.368				588.742			475.682		785.216
A0A0D9QYJ1	A0A0D9QYJ1	A0A0D9QYJ1_CHLSB	SRSF2		14424.7	11190.4	30915.9	21911.9	16112.7	14300.1	14560.2	10667.5	14207.5	17788.6	13337.3	15605.1	17461.1	18754.8	13580.4	16513.2	14878	15394	11620	12275.5	18043.5	14950.1	20705.5	15924.2	13405.8	15409.4	34331	13288.9	14274.3	14700.7	17076.8	8963.18	17276	16221.3	20068.1	26360.1	14423.9	16333.3	23706.5	17879.7	53458.8	32513.5	28839	22571	18551
A0A0D9QYJ2	A0A0D9QYJ2	A0A0D9QYJ2_CHLSB	CRELD2		5341.83	4966.36	5866.62	6078.5	4528.04	4749.09	5617.91	3757.68	5074.24	6031.82	5687.2	4151.42	4922	5060.35	6105.42	4239.57	5065.83	5074.86	4327.74	5394.38	5498.36	4591.66	3613.03	4897.2	7155.31	6317.07	9380.7	3592.42	4807.06	5155.5	4218.03	4343.44	5682.18	4574.72	3759.12	6380.6	4817.13	3709.54	10397.4	4992.03	7821.71	6654.08	6635.11	5128.41	5849.4
A0A0D9QYK4	A0A0D9QYK4	A0A0D9QYK4_CHLSB	HTATIP2		18201.2	14782	16922.4	18659.6	18619.8	17330.2	18516.9	16524.3	20426.5	20408.6	20384.1	19340.3	19908.3	17647.4	18827.5	19137	18659.6	18197.1	20693.2	18671.2	17069.4	19728.7	19258.4	20606.2	20308.6	21179.7	17281.5	22703.3	22078.7	20648.1	19121.2	19766.2	18279.3	20047.9	16891.4	15920.1	20247.3	18814.8	20482.6	20471.4	12735.3	14990.8	21760.1	17827.6	21426.4
A0A0D9QYK8	A0A0D9QYK8	A0A0D9QYK8_CHLSB	PRMT3		13196.9	13330.9	13281.9	12808.6	14168.6	12212.6	12886.6	14666.7	11308.1	11656.7	11916.4	13041.6	12834.3	13657.1	13726.7	10639.6	13190.2	13175.4	13061.3	12777.7	11540.5	11270.4	13716.7	14085.1	14039.8	11539.2	14007.1	11938.2	13292.3	13797.7	12836.6	13358	12476.3	13191.8	14097.6	9422.84	13226.1	13129.5	10064.9	15198.7	9738.3	11838.6	10315.9	12533.3	12381.4
A0A0D9QYL1	A0A0D9QYL1	A0A0D9QYL1_CHLSB	POLR2B		27273	27765.8	26954.8	27629.6	27533	29014.3	28345.4	22132	27159.8	25943.6	23058.2	23504.6	24131.8	22783.1	22840	28345.4	26503.6	27760.6	28223	27078.7	29914.4	26149.5	26964.2	27210.9	26417.4	25295.3	21375.5	22805.1	22676.2	24610.6	24986.5	26283.9	26813.7	28463.6	26637	23123.2	27332.9	24125.5	20613.5	25912.7	21378	25022.2	25002.3	23115	23597.3
A0A0D9QYL4	A0A0D9QYL4	A0A0D9QYL4_CHLSB	SEC14L1				3469.09	5129.53	3537.96	4997.11				870.91			3449.1			6074.42	4511.96		3651.15			2527.83	2842.57			5263.21									3636.72					1963.93				3802.88
A0A0D9QYL5	A0A0D9QYL5	A0A0D9QYL5_CHLSB	ZDHHC6			3041.39			3836.69	2379.03	3935.07					2830.51	4456.05	6147.94	4783.5	2321.87	5174.39	5115.9	4807.29	2243.52	2573.49		2171.84	1987.92	3225.51	3207.4		4292.59	2015.18			3362.15	6320.39	2538.11			3621.88	4050.64		2112.64		2079.19	1900.18
A0A0D9QYL6	A0A0D9QYL6	A0A0D9QYL6_CHLSB	OGFOD1		6925.02	5009.17	5693.73	6075	6632.73	6753	7094.53	5092.16	7684.14	7789.04	6347.29	6412.55	6829.72	5195.09	5825.4	6219.96	4828.42	5880.57	6113.5	5658.92	6948.39	6490.88	7274.88	6958.24	7652.04	7491.8	6867.34	6396.79	6420.22	7032.93	6303.93	5439.86	7109.5	7041.23	6697.16	6517.59	6664.95	5198.54	6674.6	7656.43	9099.49	6485.85	5605.18	6061.45	6270.32
A0A0D9QYL7	A0A0D9QYL7	A0A0D9QYL7_CHLSB	TBC1D22A		3663.42	3401.17	3132.14	5021.89	5082.81	5414.4	3659.54	3626.42	4409.33	4837.75	4161.3	3449.74	2411.26	4037.18	3494.32	4464.87	4309.61	5124.26	3485.98	3674.07	4690.62	5226.91	5333.48	5985.95	3829.44	4314.47	6735.71	3510.35	4552.36	5260.3	4270.41	6654.91	5059.92	3565.61	4751.39	9560	4916.78	3795.34	6414.16	4342.89	7745.43	7376.65	4696.35	3953.98	3168.32
A0A0D9QYL8	A0A0D9QYL8	A0A0D9QYL8_CHLSB	SUGP1		8053.58	5239.87	7232.62	6401.25	6517.22	7720.18	7742.3	6055.1	7241.01	6392.31	5570.89	5326.04	6072.97	5334.63	5866.25	6878.09	5551.94	6996.01	6513.79	4480.69	7575.93	7436.48	6268.61	6413.72	6966.68	5873.74	7260.79	5701.98	5719.4	6649.54	6907.21	5436.42	7723.89	7110.1	5427.84	8243.61	7212.33	5119.31	7640.77	6256.37	6157.23	5859.75	7098.84	5184.55	6087.59
A0A0D9QYM1	A0A0D9QYM1	A0A0D9QYM1_CHLSB	SEPTIN9		45092.8	33935.3	41529.6	43263.1	39349.6	40331.1	42797.3	34276.9	43770.9	51828.9	42272.5	42745.8	43234	36050.5	42655.1	43843.3	36711.7	44153.5	42530.7	37015	42760.4	42727.2	43620.6	45113.3	46516.7	48504.4	49914.8	45471.8	41399.2	46418.8	43106.9	30529.9	41944.8	45060.9	38727.2	48723.7	45353.2	36968.5	47686.9	47143.4	39953.7	44581	51330.1	41784.1	48676.2
A0A0D9QYM2	A0A0D9QYM2	A0A0D9QYM2_CHLSB	ACSL5		8416.61	10234	10301.8	8341.63	9340.8	8385.02	12796.5	6390.59	8383.86	7553.52	6496.09	6920.41	10721.7	16403.5	11460	10945.2	17535	13665.2	8873.45	9760.28	7690.94	8214.1	7072.7	7491.62	9413.83	8474.36	7935.39	7138.98	8063.7	7170.54	9575.18	14820.4	16819.5	7473.4	8752.25	8778.26	12395.4	12663.5	8509.31	7471.73	8621.46	10210.2	6218.04	7442.47	9589.82
A0A0D9QYM3	A0A0D9QYM3	A0A0D9QYM3_CHLSB	NUDT21		66242.7	71870.8	75191.8	78382.9	78551	75226	62145	83646.5	71191.5	71615.6	77244.1	80922.4	67136.9	62690.3	78011.5	68837.7	61969.6	64030.7	66899.4	70023.2	70940.1	70675.5	82111.3	74491.1	70461.7	75310.2	65642.4	73012.3	95102.3	83368.9	73408.2	70759.5	73034.9	83401.5	74682.8	66693	75215.9	81921.9	78549.6	84701.4	61157.8	69568.4	67943.4	90081.5	87022.3
A0A0D9QYM4	A0A0D9QYM4	A0A0D9QYM4_CHLSB			4850.95	6112.04	6136.04	7041.99	5282.31	6197.82	5503.32	6703.66	4121.3	4286.11	4254.8	4384.04	4266.92	3253.11	3135.57	5163.42	5809.01	4742.2	5514.29	5585.3	4832.13	5409.05	5481.72	5730.35	3727.67	3464.56	3267.09	4663.87	3055.48	2727.21	5403.77	4835.4	4508.33	5890.19	4432.75	5083.4	6165.4	5261.76	5557.73	3359.69	3022.95	3298.69	3865.44	4060.25	3331.89
A0A0D9QYM5	A0A0D9QYM5	A0A0D9QYM5_CHLSB	AMFR			1356.86			1202.23	1033.46	1865.31		1393.89	1131.89				1472.47	1694.88	936.282	1642.82	1592.52		1243.11	1632.96	885.102		1416.53	1929.06		3004.25			1477.09	1148.93	1584.69	1927.85		1339.98	1140.7	1786.54	2635.94	2554.97	1032.62		901.616	1396.62		1525.33
A0A0D9QYM9	A0A0D9QYM9	A0A0D9QYM9_CHLSB	GPAM		2223.37	3557.59	3546.97	3190.98	2634.91	2734.85	2386.32	2408.31	956.753	913.659	1435.2	1295.81	1552.67	3124.03	1008.44	1924.31	3650.24	3363.58	2888.49	2849.22	2665.89	1732.07	1796.55	1566.91	1839.45	1021.24		1239.85	1790.47	1413.78	3142.88	3773.27	3334.93	2810.15	3036.19	2081.34	2132.91	2648.58	2357.43					1825.94	1410.77
A0A0D9QYN1	A0A0D9QYN1	A0A0D9QYN1_CHLSB	SHOC2		6620.51	5772.41	7676.79	7742.17	7801.69	7167.83	8200.81	7710.4	7307.3	6983.07	8477.83	7268.47	7481.59	7487.32	6490.58	7094.03	7720.71	8669.28	6353.9	7374.43	7394.66	7650.03	8275.77	8425.41	6765.43	6582.57	5866.44	6944.53	6573.74	7811.2	3473.08	6183.2	7554.16	7345.68	7001.12	7281.72	7108.6	5735.42	6431.88	7215.79	4369.58	3670.04	5884.15	6837.42	6074.22
A0A0D9QYN3	A0A0D9QYN3	A0A0D9QYN3_CHLSB	PDCD4		7450.46	13954.3		6565.85	10048.7	10175.4	8554.43	8421.7	2574	9028.38		13458.3	9618.31	7537.29	11967.6	9696.5	7525.33	10944.4	8291.87	4822.09	8408.65	10946.7	11138.5	12293	7635.41	8371.98	4675.57	8172.95		11398.1	9013.89		5413.7	8425.27		9365.08	7541.46	10913.1	5223.7	9896.71		3193.29	6929.26		9069.87
A0A0D9QYN9	A0A0D9QYN9	A0A0D9QYN9_CHLSB	STAT2		6763.61	6515.8	5899.62	6184.3	6787.69	5997.46	8837.66	5088.66	7401.91	7532.48	5575.07	5273.81	6926.02	5411.87	7152.51	5721	5178.99	6677.98	5740.62	4682.63	5743.31	6397.58	5806.61	5782.23	9119.63	4800.75	7409.07	6555.76	5924.14	7048.83	5569.46	5100.84	6992.3	6062.59	2816.15	4941.1	8693.47	5888.27	9534.06	7913.39	9581.89	5923.67	5702.76	4839.9	6197.43
A0A0D9QYP0	A0A0D9QYP0	A0A0D9QYP0_CHLSB	SMC3		32372.6	23062	29474.8	29410.7	28041.8	30303.5	30777	25324.2	32548.5	33639.8	27329.2	25630.2	29154.5	28801.9	28301.4	32041.2	25820.2	32064.4	29183.2	25055.4	33230.7	30059.4	31231.6	31405.8	32624	29670.3	32689	30143.6	28340.8	31801.6	32370.3	24840.8	32234.1	29927	28714.2	33566.3	31396.3	26235.6	34775	33387.6	27963.5	33499.2	34680.7	28664.1	31204.9
A0A0D9QYP6	A0A0D9QYP6	A0A0D9QYP6_CHLSB	SMNDC1		6577.83	8142.92	7403.31	6473.7	6745.48	5469.92	5772.16	7333.97	6138.04	5650.72	11810.2	6038.05	5906	5277.27	5092.51	7434.38	6237.6	7021.86	5910.03	6029.71	5082.05	6081.43	6554.78	7007.91	6321.85	5610.25	5857.96	6916.95	6290.11	6322.39	5735.55	6334.62	5803.55	4815.75	5798.95	4414.58	5459.04	6490.73	5117.76	5663.7	3618.63	4731.97	6619.73	6714.96	7417.28
A0A0D9QYQ2	A0A0D9QYQ2	A0A0D9QYQ2_CHLSB	PAN2		1942.27	1253.97		1321.84	2280.39	2269.45	1522.62			1589.53		2386.7	1936.36	2495.91				1758.62			1828.3	1840.8	3050.14	2242.65	2003.88		1934.77		2056.69				1755.52					2333.05	1374.32	1614.6		2181.46			1922.51
A0A0D9QYQ6	A0A0D9QYQ6	A0A0D9QYQ6_CHLSB	ADD3		4216.75		9479.61	4413.45	5319.79	5075.96	3333.62	2959.37	5166.07	5602.73	3641.07	9929.83	6089.68	11185.4	6472.54	6810.15	6953.44	4743.71	6270.64		5756.25	6867.35	7002.68	7839.63	5392.2	6717.6	6116.54	5095.3	3264.01	5273.72	5428.8			6427.27		5950.24	3035.48	6912.81	5225.68	6965.46	5149.58	3727.56	4788.7	8335.16	2528.43
A0A0D9QYQ9	A0A0D9QYQ9	A0A0D9QYQ9_CHLSB	SVIP		6434.86		3881.84	5558.1	7576.4	7781.76	9829.9	4443.31	10528.8	8520.95	5125.01	5025.67	5872.91	4459.69	11530.3	8044.25	8387.1	12853.3	8517.73	2867.27	6905.93	8717.19	8231.07	6592.68	7979.66	6526.24	6385.25	5749.11	6580.43	6856.36	5900.76	4112.73	10671.1	7116.16	5066	9749.43	7953.97	7225.58	6604.29	6993.17	12696.3	11133.1	7354.24	4626.12	7241.33
A0A0D9QYR0	A0A0D9QYR0	A0A0D9QYR0_CHLSB	CNPY2		38394.5	37361.1	41957.8	38431.1	34351.5	36788.5	31863	39592.7	35720.2	33635.2	35129.3	39100.2	34377.8	32757	33499.3	37517.1	34470.8	30168.6	39153.1	31672.9	36102	38035.5	34532	34503.1	32803.7	35352.3	32518.6	33558.9	34790.2	38124.1	36988	30805.4	33480.9	38879.2	34300.8	32147	36239.7	35221.2	33537.9	36312.6	28872.1	26922.2	41262.9	37348.9	38519.9
A0A0D9QYR5	A0A0D9QYR5	A0A0D9QYR5_CHLSB	CS		139786	65678.3	98024.5	92277.2	116715	126301	143974	56228.4	159003	140511	83114	75612.4	125723	110737	136457	108847	85726.5	130110	108185	82245.5	142365	115583	103577	123717	149170	111264	123782	125829	127622	147631	127488	64334.8	144819	127207	105760	130102	143147	109160	160478	116049	133470	149876	111352	116960	158546
A0A0D9QYR9	A0A0D9QYR9	A0A0D9QYR9_CHLSB	KAT7		16586.7	12296.7	15537.1	15684.5	16895.7	17912	17264.2	12812.9	17086.9	14747	14556.1	16077.2	17396.9	14207.5	15107.3	16218.1	15000.9	14565.5	14643.8	15030.6	13489.2	17774.2	18586.3	17790.7	15100.3	15008.7	12703.9	15751.8	16718.2	13758.2	13535.3	12942.6	16322.4	16469.6	14963.9	13292.3	17555.3	18237.9	15903.6	14011.6	81418.3	13306.6	14417.4	17560.4	16844.7
A0A0D9QYR9;A0A0D9R0A4;A0A0D9R9L9	A0A0D9QYR9;A0A0D9R0A4;A0A0D9R9L9	A0A0D9QYR9_CHLSB;A0A0D9R0A4_CHLSB;A0A0D9R9L9_CHLSB	KAT6B;KAT7;KAT8		14215.6	5489.99	7727.61	6619.01	7625.56		13300.7		49499.4	66973.4		8677.33	11064.8		10475.5	12903.4						9968.42		15148.5	40372.3		28768.9	12222.5		22565.5			37525.1	20878.1	6584.93	56891.1	14124.3		39449.3	19171	50836.8			8075.63	52778.7
A0A0D9QYS1	A0A0D9QYS1	A0A0D9QYS1_CHLSB	ANKRD52		10074.5	12960.8	10967.4	12805.8	10265.4	11214.3	10034.6	11023.1	9897.71	10045.2	9959.56	10796.7	9047.35	9967.84	9297.88	11023.9	10167	10334.4	11121.5	10645.1	11981.2	10475.9	9801.59	9315.43	10064.4	9847.78	10710.9	10426.7	10329.7	10800.5	9805.28	10669.1	10859.7	11141.9	11226.3	10866.2	9951.9	11232.6	10581.7	11510.5	10107.5	9216.16	11101.6	11569.7	10950.8
A0A0D9QYS8	A0A0D9QYS8	A0A0D9QYS8_CHLSB	NABP2		1986.16	2890.37	2288.28	2419.23	2657.2	2422.67	2421.89	2207.11	2119.38	2505.52	1795.73	2101.59	1759.86	1629.7	1756.01	2932.16	2234.78	2109.97	2671.43	1844.06	2189.19	2680.53	2462.15	2068.92	2025.32	2203.29	2390.75	1334.1	1979.8	1800.72	2018.69	2869.52	2184.84	2403.65	2084.29	3061.84	1788.53	1558.98	1545.44	1733.61	8302.04	2138.96	2519.31	1942.79	1252.77
A0A0D9QYT0	A0A0D9QYT0	A0A0D9QYT0_CHLSB	NR2C2AP		11301.8	4584.66	6865.55	8067.74	8157.42	7834.98	12940.2	3476.71	15655.7	17285.7	5193.28	5779.64	9433.62	5309.44	10013.1	7254.24	4819.51	11952.9	9073.15	3592.91	12118.1	8793.03	6752.48	8233.89	13314.5	7423.23	13521.2	9202.63	7056.83	9028.16	8968.04	4624.04	13695.2	8173.42	3899.7	14949.8	9791.49	5207.11	17675.6	10441.9	10717.3	13535.4	13786.4	7668.94	11232
A0A0D9QYT1	A0A0D9QYT1	A0A0D9QYT1_CHLSB	CENPC					332.199										725.381			161.197																						553.172
A0A0D9QYT4	A0A0D9QYT4	A0A0D9QYT4_CHLSB	ITGA3		62866.8	60059.6	60887.1	68360.8	65685.7	74128.6	100130	44515.7	65689.1	80111.7	76187.4	69408.9	71539	59378.7	69566.9	61957.7	71436.4	80241.3	79807.6	65526.6	69453.5	75185.7	63326.1	63389.2	86527	91985.4	90329.1	77540.7	67640.8	57274.9	82709.4	78618.6	88656.2	79944.9	63085.7	70647.8	90417.8	92231.2	73471.3	80916.3	73028.8	74789.3	63783.8	56638.3	64749.3
A0A0D9QYT6	A0A0D9QYT6	A0A0D9QYT6_CHLSB	SMARCC2		8744.15	7236.87	9728.58	8159.48	7561.94	7774.97	8729.96	8046.15	8500.95	8071.01	7596.27	8213.84	8483.45	7736.87	8505.43	9022.64	6861.03	8446.75	9344.26	9271.17	7773.18	9442.12	7831.12	8904.39	8216.93	8782.36	9116.54	8743.43	8867.61	8993.85	7939.42	7729.64	8724.9	9682.36	7624.14	8702.58	8751.57	7564.17	8006.74	9191.97	4908.93	7581.23	10142	7700.17	9655.61
A0A0D9QYT8	A0A0D9QYT8	A0A0D9QYT8_CHLSB	PDK2													4260.48
A0A0D9QYT9	A0A0D9QYT9	A0A0D9QYT9_CHLSB	RFXANK		2521.29	6049.93	3824.81	3900.35	3377.28	4536.49	2832.94	3278.1	1483.65	1403.89	3380.09	2818.82	1825.49	2793.58	2584.4	4050.19	3915.99	2467.15	3913.55	5331.38	2569.59	3007.77	2870.56	3803.31	1623.22	2334.07	1032.95	2261.42	3110.76	2343.27	3925.22	4675.27	2650.3	2580.54	3969.84	1740.99	3596.75	3141	666.051	2084.2		1650.55		2338.27	1965.63
A0A0D9QYU0	A0A0D9QYU0	A0A0D9QYU0_CHLSB	UBA6		27129.3	26849.2	26170.3	28573	29399	29247.4	28967.7	33502.8	33119.9	29271.3	29117.5	31340.4	33310.6	31224.8	31259	27434.5	25244	25757.7	27016.9	26315.1	26013.8	31039.2	31663.8	31996.5	30622.7	32530	24172.6	32616.2	32474.6	31744.3	25716.8	22043.9	25001.4	27967.8	26502	23872.5	28534.6	30343.4	28597.3	34114.3	22702.8	25996.3	26663.8	32517.6	32032.3
A0A0D9QYU3	A0A0D9QYU3	A0A0D9QYU3_CHLSB	LIN7C		8078.38	10478.5	16899.8	14060.5	5237.25	8611.82	11518.4	7119.94	12624.8	12815	14722.5	9182.01	8567.94	12229.9	8322.46	12288.6	7249.25	10754.6	17200.1	9084.44	11348.5	12154.5	17187.8	11034.2	11207	18339.4	20094.4	12967.8	11820.4	12830.4	9074.94	11627.6	10836.3	11515.2	12729.3	13904.7	13489.6	9172.07	13747	13579.3	17605.1	22416.6	12197.7	7492.39	11049.2
A0A0D9QYU5	A0A0D9QYU5	A0A0D9QYU5_CHLSB	MYL6B		621181	421617	443101	461584	480073	475361	520077	382159	451080	524885	467462	444165	430762	433636	433098	529452	508191	520830	440896	449165	584890	502259	436556	397872	455831	527841	579902	487004	500841	476687	467785	476167	450629	558036	461322	543826	432003	447883	500319	493999	506166	578076	714820	418749	488532
A0A0D9QYU5;A0A0D9SDP0	A0A0D9QYU5;A0A0D9SDP0	A0A0D9QYU5_CHLSB;A0A0D9SDP0_CHLSB	MYL6B		41354.2	7706.97	11898.5	18202.6	16884.8	15566.9	37181.4	8775.12	47799.8	63219.3	19214.7	21065.6	29711.8	11698.6	41746.1	27441.1	13035.4	19179.1	19821.9	11344.8	39003.7	40051.5	20792.3	32173.6	40917.1	27641.5	88804.6	21051.2	15750.1	16643.8	30531.3	10946.1	35007.2	41850.4	14623.7	71326.6	30757.4	19711.2	62651.7	41861.8	90242.1	98045.2	58455.4	14811.1	31879.9
A0A0D9QYU9	A0A0D9QYU9	A0A0D9QYU9_CHLSB	KIF18A		1327.82	977.825	1387.54	933.19		1395.04		1044.18				575.982	455.587			1106.52	1427.77	1250.07	1116.63	1035.84	1216.16			808.451								1149.23	1345.33	919.36	884.649		690.908	716.297						557.918
A0A0D9QYV0	A0A0D9QYV0	A0A0D9QYV0_CHLSB			28082.1	36035.7	46832.2	42043.4	35840.5	39260.5	37636.7	25932.9	36589.8	34172.3	40893.7	37306.6	39898.3	36608.5	39026.7	41961.5	41160.8	45752.6	49554.8	38811.9	39004.1	38610	37243.7	39728.3	33521.9	48559.7	36812.2	36803.5	36716.7	32238	40830.6	44430.5	33596.7	41104.1	38292.6	30565.8	36163.3	27726.3	35991.2	35541.9	31296.1	30029.8	53703.5	37308	42072.5
A0A0D9QYV1	A0A0D9QYV1	A0A0D9QYV1_CHLSB	METTL15		11387.7	12783.2	9564.82	13280.1	12160.3	10122	10072.3	12695.2	12210.3	10731.1	9373.33	11285.4	11085.1	11608.9	12385.5	12946	10704.9	11104.5	11082.3	11745.4	11648.3	12262.7	13255.7	12111.3	8434.29	13142.7	7974.72	13038.3	11366.1	12538.7	9528.61	12626.1	10630.1	11332	12603	11013.8	11509.8	13541.5	8050.53	9810.75	11957.9	8136.45	12646.6	11881.5	11763.5
A0A0D9QYV4	A0A0D9QYV4	A0A0D9QYV4_CHLSB	ARMC6		8659.3	7202.7	8069.79	7898.27	8363.64	7294.76	8176.55	7701	9463.54	9271.57	8002.76	7237.47	8782.3	8153.15	7329.05	9349.29	7979.56	8174.26	8140.65	8213.93	9159.23	8918.43	8806.8	8781.64	8212.52	9068.38	8454.58	8901.87	8863.18	9636.81	8454.61	7303.69	9272.48	9064.32	6659.97	8876.11	8811.19	7305.04	7527.61	9348.88	14790	8690.85	10383.8	8820.79	9107.62
A0A0D9QYV5	A0A0D9QYV5	A0A0D9QYV5_CHLSB	SUGP2		11680.1	8987.3	10694.1	11253.8	9156.16	10278.9	10505.3	9975.12	10289.6	10863.8	9679.2	9674.96	12048.2	10291.3	11736.5	10928.4	10497.7	11240.7	11211.9	9017.09	10298.2	11149.9	9757.84	11397.7	10900.3	10457	9443.32	11355	10585.5	11820.4	11576.8	10046.8	11419.2	10733.1	10390.9	10053.6	11673	11005.2	9591.45	11918.4	8661.07	9529.76	9962.48	10894.7	13364.5
A0A0D9QYV6	A0A0D9QYV6	A0A0D9QYV6_CHLSB	PPP1R9B		7993.33	7746.45	8999.96	9103.29	6967.04	8100.74	8559.31	8683.58	8660.28	8065.16	9883.46	9364.95	9962.25	8686.37	8698.52	8009.77	7779.08	7784.02	8923.51	8133.26	7487.41	9052.82	8773.28	8797.75	7936.99	8119.83	6734.44	9347.84	8308.45	8042.47	6937.17	7742.72	7899.89	7215.57	7548.01	7430.96	8953.68	8039.35	7793.85	8411.42	6357.1	7022.2	8872.48	9179.83	8937.78
A0A0D9QYV6;A0A0D9RK50	A0A0D9QYV6;A0A0D9RK50	A0A0D9QYV6_CHLSB;A0A0D9RK50_CHLSB	PPP1R9A;PPP1R9B		8382.73									6480.7								4911.56																		6327.43			4934.23				6356.04		7001.45
A0A0D9QYV7	A0A0D9QYV7	A0A0D9QYV7_CHLSB	ESYT1		35536.2	38470.8	36967.1	30928.2	34502.8	34164	51776.4	30143.6	33566.6	34198	22620.3	27536.2	42295.2	51736.9	49934	34392.7	54429.5	56523.9	31545.6	30685.2	30753.4	34481	28408.5	30215	42395.8	25455	33857.9	27895.2	28252.7	30543	35440.9	39530.3	61299.6	31424.4	30382.1	32806.7	48164.8	49961	37463.7	37269.3	32021.1	32673.3	26193.4	29436.3	40917.3
A0A0D9QYW0	A0A0D9QYW0	A0A0D9QYW0_CHLSB	HOMER3		6763.24	5294.52	6298.29	7272.06	6973.32	5405.87	4860.25	6021.43	6882.94	5100.69	8813.37	6030.08	3961.74	4061.08	4888.62	4349.45	6184.1	4677.51	4733.4	6137.47	5964.06	5962.19	5296.97	6042.36	5371.14	5617.36	5345.09	4773.59	5845.27	6225.81	7956.55	6122.23	4747.18	5836.41	7214.38	6288.99	6886.14	6969.53	5920.19	5110.48	9011.61	6320.57	5674.77		5913.6
A0A0D9QYW2	A0A0D9QYW2	A0A0D9QYW2_CHLSB	PA2G4		122014	86946.8	103529	109971	106432	117782	124603	88292.7	125124	123500	112327	96684.6	106646	101848	112340	119003	106241	116940	114215	121743	132754	121079	115339	124578	123736	130423	139486	122632	109053	112861	119418	84220.7	119753	127254	120124	124225	117606	94243.4	130894	125353	136453	130455	170124	99802.3	132342
A0A0D9QYW3	A0A0D9QYW3	A0A0D9QYW3_CHLSB	DDX49		10003.5	5631.57	11611.8	11305.1	9008.07	8404.55	10229	7056.35	8265.76	6240.13	7864.22	5643.55	12999.5	8559.15	9325.79	10611	7576.39	9156.25	7840.76	6523.52	8725.64	6294.03	10746.9	8763.6	8504.15	5321.04	10255.4	7882.85	7670.69	7709.08	12081.6	12200.2	11050.6	8847.26	10277.4	7768.69	8548.58	6389.92	8954.36	6728.08	81141.6	9708.81	7724.36	7281.71	11286.1
A0A0D9QYW4	A0A0D9QYW4	A0A0D9QYW4_CHLSB	COL1A1		6045.19	5841.51	7942.18	3714.72	3861.9	4155.86	4024.99	2609.16	5471.48	4103.57	2092.88	2527.57	3369.66	4758.59	3483.65	6155.15	8197.03	9172.22	3600.87	5766.92	4701.71	3145.23	4648.37	2805.74	3680.4	4889.82	5444.29	4121.97	4096.63	6921.52	7564.21	7866.64	9281.09	3996.39	3896.68	7029.15	2364.54	2952.08	5413.25	4178.47	62950.1	23813.8	3623.38	3339.36	5090.16
A0A0D9QYX5	A0A0D9QYX5	A0A0D9QYX5_CHLSB	YTHDC1		4991.78	6843.84	3753.96	3603.19	3757.79	5163.04	4071.49	6580.8	3741.14	6723.96	5837.14	6822.1	4543.5	6264.6	4110.69	5396.9	5843.56	4596.77	5444.06	5786.9	4320.27	4333.24	4053.71	4344.17	7098.48	5526.24	7698.51	5538.74	5445.25	4225.76	3784.76	5119.19	5694.96	7061	7202.78	4615.15	5464.9	8505.71	5165.68	6795.11	11685.6	11407.9	6383.05	4328.11	7282.01
A0A0D9QYX6	A0A0D9QYX6	A0A0D9QYX6_CHLSB	ELP4		4461.1	3623.11	5204.05	4341.77	4052.16	4336.19	3144.36	3438.83	3549.16	3138.02	2477.04	3418.45	3589.8	3760.66	3666.81	4542.85	4244.73	3800.28	4400.94	3025.19	3702.28	4130.51	3875.35	3983.02	2594.64	3254.18	3054.22	2927.4	3426.55	2933.02	3843.68	3223.76	2969.99	4211.38	3035.39	2588.6	2836.12	2951.55	2264.05	3398.22		1917.27	2780.48	2487.49	3245.18
A0A0D9QYX7	A0A0D9QYX7	A0A0D9QYX7_CHLSB			87034.2	56315.4	64946.3	79856.3	71177.4	70623.1	85164.1	65244.1	88410	82256.4	85238.4	84775.8	82034.3	73023.4	73190	76726.5	60506.4	65557.8	67274	70418.8	77065.9	78198.9	75363.8	80277.1	74986.1	86893.4	86484.5	90167.6	85136.9	72125.3	82773.1	59588	75439.9	85163.4	71879.3	81508	78688.2	75041.4	76815.6	82966.3	75574.7	76573	77943.3	71877.6	72179.7
A0A0D9QYX7;A0A0D9SAM0	A0A0D9QYX7;A0A0D9SAM0	A0A0D9QYX7_CHLSB;A0A0D9SAM0_CHLSB			25926.8	18308.2	9100.18	17676.1	12940	15328.8	21436.2	15885.3	24891.6	20503.6	9425.39	11152.2	16872.2	13857.5	18685.4	14974.3	10323.9	18380.8	14232.4	10025.4	19255.5	18537	16075.8	17638.1	18791.4	18438.6	29844.7	17896.9	18017	18324.6	19757.4	12210	19459.1	17244.2	16784.9	18182.1	14951.2	13653.5	20074.3	18865.1	9608.95	19121.6	21836.8	14440	16719.1
A0A0D9QYY1	A0A0D9QYY1	A0A0D9QYY1_CHLSB	RCN1		70760.5	29769.2	43165.5	37217.8	54265.6	64917.7	64156.3	46241.3	62806.8	92856.7	39409.9	55150.8	61099.5	43982.7	59943.4	54026.8	52116.7	64375.1	58444.3	43856.6	64827.8	46264.6	40086.8	56435.9	58365	41512	68229.8	67155.2	44782.4	62101.7	55143.7	35617.5	68579	53701.1	46776.7	71936.1	52461.5	44083.4	78740.5	71416.9	81289.6	67952.9	95558	51167.5	79141.3
A0A0D9QYY4	A0A0D9QYY4	A0A0D9QYY4_CHLSB	SFR1		4536.19	6432.09	3972.24	4941.18	4868.93	4928.02	3419.65	5774.53	3488.66	2879.95	4694.75	4102.26	3775.29	3757.2	3963.53	3944.27	4144.74	3837.37	5819.48	5653.39	3971.96	5655.5	5146.26	4911.81	3636.47	3533.29	3157.95	3860	3476.57	3325.79	4142.29	4737.22	2896.67	4008.69	4645.5	2539.72	4282.42	3857.95	2743.91	4255.03		1830.94	3264.56	3821.78	4127.04
A0A0D9QYY5	A0A0D9QYY5	A0A0D9QYY5_CHLSB	EIF3M		50604.9	51393.2	48813	54824.9	51967.6	52264.2	56740.8	54792.9	54824.2	50238.1	55060.9	50905.9	57097	54251.6	56279.4	55138.7	48608.9	46524	52317.7	59542	53528.3	53801.4	53356.9	54311.3	49465.2	50371	47774.3	50248.6	52043.6	53213.1	49882.5	45660	47120.2	49528.7	50681.5	42314.8	50086.2	51753.4	44817.7	45985.6	34484	41558.2	43274	53694.6	51031.7
A0A0D9QYY6	A0A0D9QYY6	A0A0D9QYY6_CHLSB	COPE		15171.3	11227.6	13494.1	11650.8	12205.9	12826.2	13571.5	9848.96	15867.7	17049	12297.1	10867.2	12396.6	11677.6	13888.4	16887.7	10979.8	14024.6	12955.9	12072.9	14847.2	13250	11337.4	14556.6	15877.4	13529.7	14890.4	14870.1	11906.4	15235.4	12789.1	10321.6	14183.6	13888.9	11361	15562.2	12806	11024.3	13917.7	12249.8	16986.3	14662.1	13820.5	11887.6	13344.7
A0A0D9QYZ5	A0A0D9QYZ5	A0A0D9QYZ5_CHLSB	QSER1		3533.02	2527.11	2598.31	3029.22	2943.18	2984.86	2227.35	2966.51	2073.36	2516.27	2107.2	2497.44	2245.8	2049.38	2269.4	2366.67	2644.29	3006.46	2749.32	3190.32	2738.3	2504.22	2670.6	3175.79	2634.14	2284.94	1999.61	2008.55	1459.79	1528.38	3015.65	2694.35	2805.03	2192.24	2615.03	2701.72	2808.76	2700.75	2504.52	2149.53		2550.58	2252.37	2618.79	2280.41
A0A0D9QZ00	A0A0D9QZ00	A0A0D9QZ00_CHLSB	SUOX		1529.24		879.108	1079.86	1016.58	1422.66	997.343	748.839	1360.41	1620.77	764.383	717.529	1208.15	695.646	1183.61	1101.01		1236.86	783.229	362.439	1084.88	1046.11	2083.09	1312.65	910.748	1145.14	2000.46	1207.74	786.924	1014.5	995.268		1430.87	1393.56	1267.55	2164.33	1013.42	714.949	1947.19	1124.58		1016.18	1154.41	1162.54	1443.69
A0A0D9QZ01	A0A0D9QZ01	A0A0D9QZ01_CHLSB	UPF1		43844.4	38053.1	40635.6	43297.7	38891.1	41343.1	40865.6	34215.9	41836.7	38129.4	41806.2	40026.8	37959.4	35384.2	36052.9	38625.7	36704	38456.8	43232.8	36401.4	41252.3	39782.5	39312.1	37445.8	39566.5	42377.1	42558.1	39441.5	40549.7	37620.9	46394.3	39117.8	37564.9	43768.9	40100.6	38181.8	39507.8	36580.2	37453.8	38846.9	37551.5	34850.4	34520.4	37918.5	37680.4
A0A0D9QZ02	A0A0D9QZ02	A0A0D9QZ02_CHLSB	RAB5B		10014.9	6879.38	7536.25	6049.03	5751.93	6226.93	9560.26	6404.93	7676.48	7769.28	7490.06	5765.79	8710.18	8466.96	10956.4	8737.35	11147.1	13181.1	7954.12	6676.07	7132.4	7540.94	5867.25	6039.22	9763.24	6736.89	8099.76	7502.27	6242.89	7383.41	7237.48	8556.94	11071.4	5765.09	7597.37	8477.69	9035.47	9900.06	9009.88	7089.06	6734.89	7180.13	9037.04	7645.75	8265.85
A0A0D9QZ03	A0A0D9QZ03	A0A0D9QZ03_CHLSB	COMP		3009.31	8994.27	8213.5	6199.89	5410.04	6378.28	5766.04	5720.52	3206.6	5902.21	4428.53	5639.45	6133.88	6683.05	8522.03	10823.7	7823.02	6875.62	8009.29	8038.19	7646.57	3878.22	7376.84	5162.24	5493.07	7025.86	5882.96	6360.31	8120.55	5863.22	5254.54	9098.14	9399.94	4322.63	5867.33	4920.36	5506.83	5899.64	4669.84	7914.57	13711.5	7390.83		8726.57	7143.15
A0A0D9QZ03;A0A0D9RRN8	A0A0D9QZ03;A0A0D9RRN8	A0A0D9QZ03_CHLSB;A0A0D9RRN8_CHLSB	COMP;THBS4		9787.51	8604.34		7267.85		8817.11	9421.89		7755.81	6016.66	8569.13		7232.98		8371.77	11148.6	13368.7	14434.8	9180.27		9947.25		6787.29		7609.23	9359.54	8298.7	10621.1	12183.2	8021.66	12250.7	19193.5	14673.7	8028.95	9874.08	8830.56	9803.39	7414.13	6327.57	9829.29	58474.5	32026.4	8971.25	6145.16	8357
A0A0D9QZ04	A0A0D9QZ04	A0A0D9QZ04_CHLSB	CDK2		21325.4	29555.7	23604.7	22477.5	25393.9	24200.9	22898.3	19723.9	21399.8	14879.6	17802.2	18440.7	20754.1	18815.6	18469.9	21567.4	24852.5	21687.5	22577.8	27420.1	22153	20077.9	19852.5	23018.5	16428	16129.3	17473.7	19151.5	17728.6	19891.7	18777.1	21922.7	21079.8	21768	26503	20171	20511.5	21839.3	15598.2	17508.9	11594.9	14283.3	10912.9	18976.1	17008.9
A0A0D9QZ04;A0A0D9QY39	A0A0D9QZ04;A0A0D9QY39	A0A0D9QY39_CHLSB;A0A0D9QZ04_CHLSB	CDK2;CDK3		22834.5	10142.5	18837.5	25879.5	16963.3	18293.9	25137	7907.74	26398.4	30107.7	9083	9517.2	17840.4	14370.5	19880.1	15356	13595.9	26745.5	17064.8	11048.7	21834	16744.6	11426.1	13294.3	25815.8	11047.1	30715.6	16018.5	14334.4	17175.2	19958.5	8881.49	20656.5	18478.3	10064.4	33409.7	14968.3	9896.37	29374.2	13265.8	101166	31337.5	11643.4	7265.95	12443.2
A0A0D9QZ06	A0A0D9QZ06	A0A0D9QZ06_CHLSB	GTSE1		1974.31	2483.72	1998.74	1927.94	2555.57	1514.26	1151.53	1379.28	363.186		901.315	834.924		1134.63		1416.44	3949.45	1990.09	1340.63	2035.08	1965.17	1600.77	1303.51	1598.29		582.891		695.815	664.134		1186.66	2208.05	1969.63	1605.95	1847.35	1830.78	2151.54	1230.39	1216.84			990.36		539.758
A0A0D9QZ14	A0A0D9QZ14	A0A0D9QZ14_CHLSB	DGKA		17419.6	13813	13585.1	13776	13000.2	13274.6	13751.9	12644.3	14788.4	16025	12914.3	13975.1	15089.3	13120.9	15451.1	13231.1	13080.3	13466.4	12866.4	11180.9	14052.9	12644.3	12552.1	12569.3	15662.9	13524.4	13183.7	13761.2	13335.4	15017.1	15210	10579.1	14705.6	13184.9	11275.4	15035	14638.1	11245.1	16061.4	14230.2	19163.2	16706	13589.8	13656	14791.8
A0A0D9QZ15	A0A0D9QZ15	A0A0D9QZ15_CHLSB	TTC38		52522.6	37498.6	38502.6	42592.1	32318.3	33407.3	44256.8	32726.5	40482.3	43079.9	35168.3	28918.7	39786.8	26852.9	32259.2	43635.9	32690.4	39160.5	41951.4	29499	41752.4	43201.6	41898.4	40777.9	48406.5	36729.9	41704.5	42808.5	31943.2	35748.7	47274.9	21461.8	40311.9	44535.5	34686.7	35944.7	46041.7	28969.2	43559.1	47020.3	43089.9	38540.4	34917.2	26714.7	29559.2
A0A0D9QZ19	A0A0D9QZ19	A0A0D9QZ19_CHLSB	PYM1		98245.6	80971.1	90310.5	95349.2	104148	99442.7	114541	106619	103583	95517.5	96962	113792	110715	113584	99466.9	91508.9	108442	93020.5	98810.1	93087.2	97274.5	90203.2	103756	108483	99342.3	101633	87162.5	106204	107675	108126	81749.4	82212.6	90208.4	95628.1	101041	85043.5	94461.2	110109	95751	88687.1	60930.4	62804.9	107464	116767	110076
A0A0D9QZ22	A0A0D9QZ22	A0A0D9QZ22_CHLSB	FTO		31839.9	22452.4	26176.9	27669.9	24644.9	28873.8	27195.6	21499.4	29352.3	27576.8	22393.4	22400.8	26506.7	23511.8	28094.2	26599.3	21409.4	25997.8	25333.7	24453.9	28458.7	25680.1	20634.3	26296.9	29096.8	22086.1	27632.7	27455.4	21887.6	25711.9	26732.2	21301.2	27350.6	26929	25252.6	25731.5	26297.5	20216.3	23300.1	26591.9	18969.9	27709	27565.4	20720.1	27417.2
A0A0D9QZ24	A0A0D9QZ24	A0A0D9QZ24_CHLSB	SARNP		55361.2	46808	50074.4	46063.5	39373.2	42103.3	44137.9	42387.9	48877.3	50464.4	48541.8	42453.8	37103.4	41732.4	45693.6	58986	40082.3	51646.4	54830.5	51930.8	46857.3	46628.5	43322.3	48457.3	45845.9	56677.2	50195.2	48602.5	41007.1	46233.4	48764.8	45207.7	50297.9	49426	49429	53136.8	42847	40397	44314.4	47461.6	51874.1	52801.5	64898.6	40166	50847.8
A0A0D9QZ26	A0A0D9QZ26	A0A0D9QZ26_CHLSB	AKTIP		5209.15	5548.13	6417.17	5834.03	6071.8	6096.1	6317.11	6704.05	5544.18	4930.71	6009.08	5970.44	5672.01	6896.58	4875.31	4678.03	6651.92	5528.07	6136.48	6727.02	5900.35	6060.87	6688.39	6417.21	5095.82	6822.72	5036.13	5337.27	6594.96	6065.29	7677.51	6953.25	5245.79	6987.73	7873.87	4757.68	6041.32	7469.02	4428.49	5505.22	4169.15	4185	5215.05	6544.88	5450.5
A0A0D9QZ27	A0A0D9QZ27	A0A0D9QZ27_CHLSB	RBL2					2338.83		2745.15	2985.09		2156.39	1792.83			2326.79					2592.41		504.272	2327.68	1811.34		2060.13	2444.41	2129.33			1809.29								2892.37		1270.55						2375.87
A0A0D9QZ33	A0A0D9QZ33	A0A0D9QZ33_CHLSB	SLK		13186.2	13992	13482	13884.1	15824.2	15160.7	14486.8	17239	13788.5	14249.4	14078.1	14998.3	17166	15330.6	17782.3	13808.5	16031.6	14561.9	16881.3	16511.1	15515.7	15694.1	17156.7	15964.1	14382.2	16233.4	11609.3	17994.3	16251.4	17502	14861.5	16329.6	15185.3	14034.4	17096.3	11544.9	15854.1	17827.1	11887.3	15234.6	8420.18	12230.4	17134.9	17461.9	17327.8
A0A0D9QZ35	A0A0D9QZ35	A0A0D9QZ35_CHLSB	KLHL26		1653.97	1792.62		2015.87	1708.14	1826.63	2153.87	1736.95	2818.72	2334.42		1883.61	1869.39		2131.25	2443.36	1514.46	2351.43	2147.05	1727.07	2016.05	2103.51	2147.62	1943.07	2191.59	2575.21	2429.14	1352.31		1775.02	1935.12		1986.99	1835.44		3003.67	2096.45	1445.25	2174.26	2042.7		2848.48	2032.31	1785.22	2185.16
A0A0D9QZ41;A0A0D9RNM8;A0A0D9RVA0	A0A0D9QZ41;A0A0D9RNM8;A0A0D9RVA0	A0A0D9QZ41_CHLSB;A0A0D9RNM8_CHLSB;A0A0D9RVA0_CHLSB	TOX2;TOX3;TOX4		6642.65					9747.34	6907.5		5779.21	6571.68					8543.75			7196.19	9255.66		6250.73	10857.1		11925.4	6079.85	9135.76	5854.51	9488.96					6349	7679.44		4998.13	9512.42		5909.28	5240.31	4898.35	6323.06	5449.76
A0A0D9QZ45;A0A0D9SCD6	A0A0D9QZ45;A0A0D9SCD6	A0A0D9QZ45_CHLSB;A0A0D9SCD6_CHLSB			2223.31	2650.85	3430.89	1685.75	2764.84	2353.41	2124.32	2352.42	2374.65		2327.26	2837.76	2352.44	2419.16		2645.12	2161.92	2559.99	2389.59	3408.93	2696	2816.48	3289.88	3165.01	1572.07	4153.92	2959.6	2698.46	2825.82	2353.53	2844.76	2061.74	2149.55	2301.34	2389.37	3509.72		1690.4		2856.68			3011.69	2475.66	2675.35
A0A0D9QZ46	A0A0D9QZ46	A0A0D9QZ46_CHLSB	ATXN10		23870.3	23268.4	24835.4	28174.3	26463.3	27188.4	26729.5	25708	27645.2	29504.7	26884.1	24326.5	24457.6	22890.4	25551.7	27611.5	25564.2	24552.8	27767.5	26237.9	28114.5	28177.2	28488.7	29593.8	29744.5	31848.4	28495.9	26561.9	30842.6	28594.1	26288.3	23989.9	23323.5	28501.3	27750.2	25587.1	28437	29425.2	26840	29683	19326.2	27958.1	25482.4	34527	31994.9
A0A0D9QZ51	A0A0D9QZ51	A0A0D9QZ51_CHLSB	FBLN1		23458.8	16925.8	25311.3	16378	17157.6	15411.6	18047.3	17358.4	16819.1	15448.7	15072	13021.4	16917.3	15594.7	17892.5	22462.3	25293.3	24112.2	15689.1	17156	18790.4	17507.5	16401	16299.7	12987.5	14675.9	15449.1	15224.1	15248.5	17462.9	18829.8	19214	16967.3	14163	12737.7	14051.8	13234.8	13020.3	12742.3	16059	62936.8	29600.3	13275.2	13877.7	13408.8
A0A0D9QZ56;A0A0D9RNT7;A0A0D9R8X7;A0A0D9S5B0	A0A0D9QZ56;A0A0D9RNT7;A0A0D9R8X7;A0A0D9S5B0	A0A0D9QZ56_CHLSB;A0A0D9R8X7_CHLSB;A0A0D9RNT7_CHLSB;A0A0D9S5B0_CHLSB	UBA52		115641		78577.1	80195.1	104972	135746	165506		106402	121937	42039	60282.2	101715	67275.8	92378.8	102953	62252.7	112365	118202		146638	147834	129866	126640	172261	134734	119578	105426	85553.3	104750	136511	53834.3	130885	175170	112272	143751	158721	83542.3	126864	148205	49784.1	100629	64496.5	78937.2	84600.1
A0A0D9QZ56;A0A0D9RNT7;A0A0D9S9N6;A0A0D9R8X7;A0A0D9S5B0	A0A0D9QZ56;A0A0D9RNT7;A0A0D9S9N6;A0A0D9R8X7;A0A0D9S5B0	A0A0D9QZ56_CHLSB;A0A0D9R8X7_CHLSB;A0A0D9RNT7_CHLSB;A0A0D9S5B0_CHLSB;A0A0D9S9N6_CHLSB	UBA52		12646.5	8552.53	6857.71	6296.9	6508.4	6242.38	8722.83	6308.44	9786.65		4739.98	6191.8			4372.25		6854.86	7617.11	9122.76	7874.48	10886.9	9319.82	7349.53	5563.26	6857.56	9740.6	7737.99	5307.34	7847.24	6563.59	8351.56	9738.63	7350.96	8986.84	7406.71	7946.95	9147.85	7864.28	6159.28	8967.64		8955.41	6758.61	6189.29
A0A0D9QZ56;A0A0D9RNT7;A0A0D9S9N6;A0A0D9SA76;A0A0D9SC55;A0A0D9R8X7;A0A0D9S5B0	A0A0D9QZ56;A0A0D9RNT7;A0A0D9S9N6;A0A0D9SA76;A0A0D9SC55;A0A0D9R8X7;A0A0D9S5B0	A0A0D9QZ56_CHLSB;A0A0D9R8X7_CHLSB;A0A0D9RNT7_CHLSB;A0A0D9S5B0_CHLSB;A0A0D9S9N6_CHLSB;A0A0D9SA76_CHLSB;A0A0D9SC55_CHLSB	UBA52		17419.9	8976.05	11308.4	10518.9	11236.5	12643.7	11877	6534.26	13075.1	10408.4	6565.3	7066.5	6774.61	6727.73	7581.74	11214.7	9110.55	11841.9	13590.8	8217.18	11407.3	11404.1	10323.7	10313.3	13886.1	11477.5	15653.7	10120.7	9266.83	10868.1	12282.3	8966.28	11791.9	11629.8	11975.9	15519.9	13390.7	10463.1	15888.6	11582.4	14648.7	18579.6	5758.14	7073.21	8142.44
A0A0D9QZ58	A0A0D9QZ58	A0A0D9QZ58_CHLSB	KXD1		3619.65	4511.51		3356.75	3834.76	4275.89	2660.75	5561.64	2189.09	2745.64	4818.44	3217.37	2214.68	3612.7		4921.68	5895.05	4444.76	5368.28	7613.69	3816.01	2026	5759.13	3667.99	1620.56	3468.67	3558.43	2987.76	3209.76	3599.3		8142.01	3284.64	3102.99	6317.45	3493.8	2327.52	3983.57	2606.99	1969.85	5433.25	2961.67	5325.93	6273.04	2860.22
A0A0D9QZ60	A0A0D9QZ60	A0A0D9QZ60_CHLSB	METTL7B		3586.51	4821.69	4589.43	2301.99	4181.57	3301.57	4997.31	3416.06	2821.69	3506.73	3186.15	4056.92	4399.41	7649.54	6379.07	4085.66	7657.74	7231.41	4124.72	4423.59	3453.98	4035.53	4196.91	3950.37	4185.09	3374.11	2870.55	3805.42	3563.11	3277.89	3998.29	6158.66	8837.81	3648.19	4155.92	3625.79	6360.32	7512.82	4017.76	3448.27			2959.5	4301.36	5202.57
A0A0D9QZ63	A0A0D9QZ63	A0A0D9QZ63_CHLSB	SMC1B					1263.17		1533.87	1684.57						2171.09	2174.49			1857.06	1644.95			1461.82				2066.62	2206	1276.85		1726.97				1977.15										1350.12		1391.15
A0A0D9QZ65	A0A0D9QZ65	A0A0D9QZ65_CHLSB	FKBP8		8487.14	9394.86	10625.9	9092.94	12586.8	11572.6	12936.4	8326.73	9552.04	9205.76	8928.42	8204.26	10203	12431	12115.3	9646.52	14965.3	16498.9	9908.73	9348.48	11074	12646.6	12110.9	13189	11107.7	9665.05	8853.41	8862.15	9170.46	10785.9	10704.3	9895.5	16502.3	9825.82	11649.9	9172.22	15453.4	13016.4	8969.72	9538.59	9214.35	7947.88	7523.13	10083.1	11766.8
A0A0D9QZ68	A0A0D9QZ68	A0A0D9QZ68_CHLSB	ELL		5919.76	8690.62	5028.18	5000.77	6591.14	6223.68	4863.76	5554.52	4043.65	3105.26	4021.91	4690.79	5167.31	5273.89	4220.24	6492.54	7270.04	4840.47	6734.12	5276.28	5537.67	5195.4	5653.23	5428.53	5038.28	5602.36	3953.76	4484.09	4844.8	5407.74	6211.98	4805.54	5275.63	6456.52	5962.88	4951.51	5232.06	5805.53	5540.05	5296.94		4023.33	3593.91	5061.48	4964.96
A0A0D9QZ69	A0A0D9QZ69	A0A0D9QZ69_CHLSB	PDCD11		21510.9	19452.1	19240.3	18999.5	18621.2	19259.9	20691.6	19160.6	19048.7	17522.3	20908.3	18824.7	20553.8	21725.1	21171.2	19723.6	22532	22099.1	19422.1	19074.8	17705	19020.5	17117.2	16517.5	19126.5	17865.6	18344.9	17027.7	17360.7	17969.2	21882.1	20567.9	23767.8	19771.7	19024.5	19987.4	21111.8	21520	19550.7	17998.8	18784	19726.6	16018.6	18127.4	18471.2
A0A0D9QZ70	A0A0D9QZ70	A0A0D9QZ70_CHLSB	FAM118A		4162.16	2551.6	3340.69	4478.52	4059.12	5207.67	5229.79	3988.64	3110.05	3224.14	4627.56	5045.72	3225.52		4778.97	2989.46	2395.69	3220.87	4223.47	3613.66	3095.34	4700.2	3534.46	3240.11	4642.56	4715.6	2475.21	4318.04	4612.24	4475.42	4097.88	3477.52	2315.53	5179.4	4038.61		4595.12	5012.8	2075.6	4761.3	1571.72	1889.44	4037.28	5551.33	3054.39
A0A0D9QZ71	A0A0D9QZ71	A0A0D9QZ71_CHLSB	ISYNA1		35566.9	23338	32629.6	37054.1	31288.6	37450.4	38710.3	24355.5	28027.3	28665.1	31075.3	24866.8	19491.7	22465.8	17340	39011.9	27829	34462.5	40764	30913.8	33944.7	35204.4	28938.9	30173.5	31307.7	32814.6	35708.9	29171.4	25731.9	21389.7	42295.7	35250	33077	41213.2	31691.7	37431.5	39983.8	30450.3	24736.4	36902.1	36569	39410.4	34773.1	25763.2	26469.3
A0A0D9QZ73	A0A0D9QZ73	A0A0D9QZ73_CHLSB	CD59		70735.7	30686.6	48347.6	61985.9	34458.8	45109.8	71229.5	26662	44384.4	69611.2	51241.3	41462	40667.6	35406.1	43007.9	82004	40169.2	61339.1	67531.2	34266.9	49991.9	56090.1	34693.7	48525.5	68670.1	77464.7	67107	59901.6	43968	40377.5	74696.2	60660.5	54440.8	74465.3	37161.6	86553.7	71894.9	58561.7	61700.6	68572.8	60480.9	59910.4	49462	38618.8	45253.4
A0A0D9QZ74	A0A0D9QZ74	A0A0D9QZ74_CHLSB	ATP5MK		7047.58	8788.51	8637.52	7861.44	8883.9	10127.6	11212	4490.01	6304.81	5425.53	4790.44	3596.16	6349.42	8987.49	7695.34	6880.97	15036.5	10089	9869.82	6819.1	6312.81	7286.14	5235.39	6596.35	8390.66	5969.06	8755.02	4265.86	4873.09	5459.4	8984.93	11462.8	12982.4	7908.9	6988.39	9011.74	12872.6	12298.2	7491.44	7321.58	6299.08	6423.57	3314.96	4479.07	7167.3
A0A0D9QZ78	A0A0D9QZ78	A0A0D9QZ78_CHLSB	BRD7		4107.84	4371.59	5734.77	5676.88	6897.52	6321.09	6202.12	5971.71	5862.14	5307.73	6041.16	7800.53	5078.88	5643.32	6248.63	6538.96	5546.15	6326.05	6312.38	5433.31	5768.23	6243.72	7765.84	7345.59	5688.5	6840.95	5704.18	7219.37	6528.73	7089.91	6504.59	6319	5240.25	6639.12	6740.61	5642.76	6542.23	5845.2	5557.89	6346.48	3578.24	5515.98	7198.97	8451.65	6440.97
A0A0D9QZ83	A0A0D9QZ83	A0A0D9QZ83_CHLSB	PCGF6		1651.89	3851.96	3299.62	2430.02	1774.96	2014.1	2625.62	2440.52	2079.75	1828.96	2048.23	2554.13	2224.19	3120.01	2331	1958.63	3120.84	2165.6	2003.01	2792.05	2603.54	1366.02	2309.91	1263.61	1774.13	1466.77	1468.33	1712.35	1477.91	1428.41		2420.02	1729.88	1426.54	1723.74		1688.22	2095.86	837.117	1856.39		479.494	1649.02	2307.46	1960.25
A0A0D9QZ85	A0A0D9QZ85	A0A0D9QZ85_CHLSB	GDF15											1377.13			2940.76			3399.68		1662.65				1527.02					1543.38		2451.55	2130.46				2584.16		2709.13			1387.26			2838.78	2277.89
A0A0D9QZ88	A0A0D9QZ88	A0A0D9QZ88_CHLSB	PGPEP1		4690.58	5269.77	5181.59	5654.81	5998.55	4467.96	5412.29	4642.63	4129.54	5138.73	6105.04	5957.45	4919.08	5240.11	4700.7	4815.36	5165.93	4146.74	4524.11	6019.13	4220	6213.45	6522.27	5033.53	3463.96	6062.12	3846.62	5487.09	5683.66	4528.98	4546.62	7487.77	4365.07	4205.98	5221.58	3341.88	4674.55	5028.75	2490.05	5188.98		2431.96	3619.02	6052	5463.32
A0A0D9QZ89	A0A0D9QZ89	A0A0D9QZ89_CHLSB	LSM4		27618.8	30240.9	27044.3	30421.4	31923.1	31135.4	25012.9	26761.1	23656.4	27803	38336.2	29116.2	24093.6	25745.2	29069.4	31201	25767.2	29879.7	31170.1	31496.2	29059.3	29229.2	32601.9	30669.9	24657	36464.8	27761.8	31159.9	29323.6	26360.5	26562.8	25166.1	25888.6	30914.4	32970.7	17971	28464.4	26464.2	22994.6	30867.1	18685	17943.3	34626.3	32558.6	26766.3
A0A0D9QZ90	A0A0D9QZ90	A0A0D9QZ90_CHLSB	FBXO3		3945.49						3745.54			3004.56						3470.8					2443.74	2692.28					1926.43						4587.07			3546.68						4146.74
A0A0D9QZ96	A0A0D9QZ96	A0A0D9QZ96_CHLSB	NUP50		18372.7	17545.8	20477.5	22281.7	18905.9	19619.9	20484.4	18582.6	20430.8	19561.6	19812	19812.9	20345.3	20086.4	20145.9	20184.4	19858.4	19580.6	21528.9	19404.8	20900	21191.9	23157.9	21783.2	19350	19721.8	18449.4	22708	20330.4	21908	21516.1	17953.4	20202.8	20459.3	20292.4	22503.5	20971.1	19696.3	21602.2	20807.6	21133.8	18841.4	21975.1	19780	21331.1
A0A0D9QZ97	A0A0D9QZ97	A0A0D9QZ97_CHLSB	TENT4B		3431.95	2864.72	3222.6	3326.56	3556.61	3441.36	2887.52	3648.02	2432.33	2484.67	3455.36	3559.16	2663.24	3152.06	2782.87	2747.68	3260.23	2816.59	3222.15	3055.19	3402.47	3449.36	3341.69	3529.55	2833.46	3359.61	2732.78	3078.36	3339.44	3251.32	4072.59	2919.39	2288.49	2840.54	3194.55	2576.75	3040.57	3490.86	3300.13	3524.53		1318.59	3446.23	4234.61	2934.23
A0A0D9QZA0	A0A0D9QZA0	A0A0D9QZA0_CHLSB	CAPRIN1		68627.2	71126.2	75718.3	74328.4	77803	77983	70187.2	73574.9	72868.3	68841.2	67074.6	73758.9	63981.6	66153.8	72252.8	74043	70966.2	70614.3	78168.3	81593.9	79988.3	73835.1	79313	82515.6	66916.3	79610.9	80223.2	71246.7	77575.5	64403.4	75622.6	68331.6	66678.4	79691.5	80290.6	70155	66384.6	69060.7	71314.6	74801.9	44775.7	58921.4	74610.1	72387.6	71622.4
A0A0D9QZA2	A0A0D9QZA2	A0A0D9QZA2_CHLSB	NT5C2		19722.5	21172.8	20179.8	17998.1	19873.6	18004	19295.4	19947.5	17606	18330.3	18976	16546.5	16609.4	18109.2	18249	23856.9	21645.8	20460.3	23478.4	21855.5	19506.7	18533.5	18372.6	20156.1	17566.9	19389.4	15043.2	16562.6	19233.6	16402.6	19250.3	20598.6	19305.3	22999.8	20510.1	15801.3	15321.5	18456.4	13231.6	18966.6	13454.9	13150.3	15944.3	19614.5	19103.3
A0A0D9QZA4	A0A0D9QZA4	A0A0D9QZA4_CHLSB	RAB3A					848.973	1607.08	1548.79		719.239		2433.31			2070.16	1305.52	2455.39		1668.74	1214				1839.58	1542.47	1401.84	2930.6		1563.53		1263.71			950.483	2445.82			2168.78	1947.91		1699.78	1886.85		1557.19		1446.95
A0A0D9QZA4;A0A0D9R3C0	A0A0D9QZA4;A0A0D9R3C0	A0A0D9QZA4_CHLSB;A0A0D9R3C0_CHLSB	RAB3A;RAB3D		2384.44	2602.85	1675.94	1908.88	2908.67	1849.42	3830.27	1817.93	2325.06	2322.35			3131.47	3476.25	3383.24	2023.81		3276.77	2302.78	2151.49	1994.05	2723.39	2104.78	3082.48	3421.59	1744.74	2503.16	1738.42	2317.49	2287.05	2091.59		4293.05	3034.13	2507.51	3032.93	3362.24	4086.64	1971.45	2133.99		2519.44	1871.84	2184.8	3079.66
A0A0D9QZA4;A0A0D9R3C0;A0A0D9RE22;A0A0D9RLG6;A0A0D9S0M7;A0A0D9S7A7;A0A0D9R0F4;A0A0D9R2F9;A0A0D9R716;A0A0D9R8L7;A0A0D9R8T4;A0A0D9RIS4;A0A0D9RUC6;A0A0D9S4H1;A0A0D9QUN5;A0A0D9QX40;A0A0D9RQK3;A0A0D9RYA8	A0A0D9QZA4;A0A0D9R3C0;A0A0D9RE22;A0A0D9RLG6;A0A0D9S0M7;A0A0D9S7A7;A0A0D9R0F4;A0A0D9R2F9;A0A0D9R716;A0A0D9R8L7;A0A0D9R8T4;A0A0D9RIS4;A0A0D9RUC6;A0A0D9S4H1;A0A0D9QUN5;A0A0D9QX40;A0A0D9RQK3;A0A0D9RYA8	A0A0D9QUN5_CHLSB;A0A0D9QX40_CHLSB;A0A0D9QZA4_CHLSB;A0A0D9R0F4_CHLSB;A0A0D9R2F9_CHLSB;A0A0D9R3C0_CHLSB;A0A0D9R716_CHLSB;A0A0D9R8L7_CHLSB;A0A0D9R8T4_CHLSB;A0A0D9RE22_CHLSB;A0A0D9RIS4_CHLSB;A0A0D9RLG6_CHLSB;A0A0D9RQK3_CHLSB;A0A0D9RUC6_CHLSB;A0A0D9RYA8_CHLSB;A0A0D9S0M7_CHLSB;A0A0D9S4H1_CHLSB;A0A0D9S7A7_CHLSB	RAB10;RAB12;RAB14;RAB1B;RAB30;RAB35;RAB37;RAB39B;RAB3A;RAB3B;RAB3C;RAB3D;RAB43;RAB4A;RAB4B;RAB8A;RAB8B									18419																															129059
A0A0D9QZA4;A0A0D9R3C0;A0A0D9RLG6;A0A0D9R0F4;A0A0D9R2F9;A0A0D9R8L7;A0A0D9RIS4;A0A0D9RUC6	A0A0D9QZA4;A0A0D9R3C0;A0A0D9RLG6;A0A0D9R0F4;A0A0D9R2F9;A0A0D9R8L7;A0A0D9RIS4;A0A0D9RUC6	A0A0D9QZA4_CHLSB;A0A0D9R0F4_CHLSB;A0A0D9R2F9_CHLSB;A0A0D9R3C0_CHLSB;A0A0D9R8L7_CHLSB;A0A0D9RIS4_CHLSB;A0A0D9RLG6_CHLSB;A0A0D9RUC6_CHLSB	RAB10;RAB14;RAB39B;RAB3A;RAB3C;RAB3D;RAB8A;RAB8B								3880.44							6219.13				5348.27		5228.06								2091.63			3650.5				4506.08				2525.77
A0A0D9QZA6	A0A0D9QZA6	A0A0D9QZA6_CHLSB	NAT10		11844.3	9749.29	11278.8	12220.7	10489.1	11660.1	14017.8	10638.6	11919.9	11598.8	12279.1	11232.4	13903.6	13105.2	13210.8	11919.8	13021.8	14584.6	11903.1	10184.6	12341.9	12433.3	10660.5	12777.2	13394.6	11874.5	13561.4	11919.7	11564.6	12121.9	12674.8	10447.2	14422.1	12982.3	10775.5	13145	14453.8	12207.4	11721.2	12715.6	10144.2	11146.1	10333.3	10517.8	13800.8
A0A0D9QZB0	A0A0D9QZB0	A0A0D9QZB0_CHLSB	ABTB2		7814.11	9047.92	8287.17	6947.74	10028.4	8160.28	8751.72	5437.07	8463.64	7704.63	5108.42	7153.27	6717.21	7105.96	8050.13	8357.25	7210.39	10366.7	7580.78	6430.01	9369.9	8346.93	5462.22	7788.57	8221.62	7993.16	6627.75	7160.34	8407.89	8953.64	8787.16	5788.67	10285.1	6897.32	6843.39	9368.38	7779.71	7477.65	7073.87	7151.23		8296.83	8629.52	6001.39	9393.69
A0A0D9QZB1	A0A0D9QZB1	A0A0D9QZB1_CHLSB	PIK3R2		5966.8	5287.38	6553.16	5178.94	5814.5	6571.46	5997.77	4418.72	6554.16	6712.28	5922.9	4849.43	6528.42	5496.45	6710.93	7447.98	5768.83	7456.4	5978.6	6094.57	8250.9	7108.29	6274.34	5535.06	7585.27	7378.11	8172.2	8139.62	5603.02	7209.87	8220.35	4934.52	7882.47	5940.09	5271.56	5951.12	6007.27	4569.55	6279.11	6632.24	7727.77	8224.71	9946.38	6035.23	7439.7
A0A0D9QZB2	A0A0D9QZB2	A0A0D9QZB2_CHLSB	IFI30		2209.16	1392.37	1847.17	1399.56	1500.73	2240.66	2093.22	731.281		1935.08	1686.87	1157.57	1736.08	1262.21	1834.53	1758.3	1368.07		1092.17	1307.37	1609.62	2415.76	2340.54	1207.11		1803.29	2291.71	2108.71	1744.67	1579.55	1845.96		2103.42	2153.07	1178.36		1411.58	1663.03	1677.78	733.969		3012.9		1690.54	943.075
A0A0D9QZB6	A0A0D9QZB6	A0A0D9QZB6_CHLSB	BORCS7		5270.38	3888.38	4660.59	4651.44	3114.81	2476.58	3950.73		3578.33	3324.26			4092.42	3028.8					3063		4125.95	4874.61	3142.02	3074.33	4123.17	6964.27	4029.6	3243.21	2970.23	4021.96	4825.45	3373.65	4261.72		3470.65	4517.35	3945.16		3999.82	3701.24	3330.33	3333.64	5527.04		3750.09
A0A0D9QZB7	A0A0D9QZB7	A0A0D9QZB7_CHLSB	MRPL27		10748.1	8721.9	12206.6	8531.93	11152.1	9794.68	7376.39	9284.79	11449.7	9350.38	10998	9304.17	8691.6	9530.21	8637.59	10894.6	8371.74	9487.39	7697.95	10269.7	10572.6	8275.61	7956.03	10653.1	10978.1	8779.95	12641	9328.7	9507.89	11496.8	10275.3	9361.54	10107.5	8359.98	10169.6	11844.2	10047.4	9537.27	12478.7	9019.38	13163.9	10885.5	11110.3	9874.29	9234.54
A0A0D9QZB8	A0A0D9QZB8	A0A0D9QZB8_CHLSB	EME1																			1950.41							3989.38								3384.91						3508.54		3178.24	3888.11			3491.86
A0A0D9QZB9	A0A0D9QZB9	A0A0D9QZB9_CHLSB	HEATR3		5088.64	4102.3	5429.79	5087.86	5470.04	5624.1	5762.56	4660.59	6380.95	6453.91	6131.56	4706.65	6477.98	5536.4	7717.8	6088.48	5095.31	5082.54	5642.99	5016.16	6122.85	5737.16	5065.48	6058.5	6025.25	6158.25	5629.88	6179.99	6523.63	5770.23	4503.51	5163.19	5417.51	4756.45	4841.76	4474.27	6441.34	5906.02	5865.79	5761.84	3114.66	5227.18	5061.58	6389.15	6219.2
A0A0D9QZC2	A0A0D9QZC2	A0A0D9QZC2_CHLSB	ITGA5		3771.91	2049.39		3670.72	3325.58	3453.87	4296.68		4742.98	4859.39		3906.99	3337.2	4279.7	3968.64	5789.99	5853.79	6852.5	4696.57	6900.18	4117.91	4383.58	4484	5171.16	4598.07	2996.91	5291.51	5655.42	5602.47	3740.75		6931.71	5380.82	5500.94	2451.79	3990.41	4153.25	4281.02		2381.87	3361.7	4563.37	3177.23	3717.94	5381.98
A0A0D9QZC3	A0A0D9QZC3	A0A0D9QZC3_CHLSB	CNEP1R1								721.019		1296.15				964.986	1223.48	1069.4	927.043		1390.88	1201.85		745.059											910.826					946.344	622.69
A0A0D9QZC6	A0A0D9QZC6	A0A0D9QZC6_CHLSB	SFXN2		15967.4	18373.5	17568.4	13204.9	14308.8	15438.8	21316.5	19187.2	15892.4	14081.3	15872	9942.28	14435.7	15078.4	16169.4	15405	21462.8	24561.9	14250.1	19939.5	13977.8	12843.5	11499.6	12608.8	17630.3	13610.9	15434.7	10844.9	11362.3	13937.3	19585.8	24865.5	29431	12642.7	14018.4	14320.8	19520.5	18496.3	17718.1	16119.1	14043.2	16933.1	15276	13843.7	15862
A0A0D9QZC7	A0A0D9QZC7	A0A0D9QZC7_CHLSB	ZNF385A			1391.92	1546.93	886.536	1391.63	893.394	699.599	1488.06	983.184	1296.22	1573.13	1378.71	1180.42	1739.1	1101.85	1016.92	1935.42	1104.78	1337.23	1395.09		1321.43	1465.46	1729.61	1469.21	789.313		998.856	1274.41	1219.05	880.427					658.245	1775.36	1379.54	1005.16	1552.29		493.683	708.218	1049.06	1209.4
A0A0D9QZC8	A0A0D9QZC8	A0A0D9QZC8_CHLSB	ARL3		31164.3	17915.6	25888.4	26170.9	19978.8	25041.1	26194	21830.3	30301.2	32859.7	20045.5	26169.6	25081.4	15548.8	22981.1	27824.6	25849.6	24627.6	26641.1	24391.2	28508.3	25783.9	21592.8	24805.5	30274.3	21297.8	31274.9	26859.4	21691.2	26801.8	31476.4	24526.8	31019.7	27020.5	17501.7	35186.8	25427.7	16302.9	32633.6	29111.5	27617.7	35091	26827.6	16298.8	28409.8
A0A0D9QZD1	A0A0D9QZD1	A0A0D9QZD1_CHLSB	COPZ1		27331.3	24284.5	14794	19249.6	16891.9	21508.9	23725.6	18767.9	20107.9	25379	15442.2	14244.3	18865.5	17106	19068.3	20793.1	19609.8	24273.9	21428.4	18224.9	22370.8	16432.8	14352.7	17349.1	24033.4	20420.1	33768.9	19578	13816.3	22203.5	25235.7	19724.7	25401.7	20506.3	13755.9	25150.8	22682.1	16139.4	22179.6	23878.4	24402.6	18823.8	30590.3	25130.7	23558.2
A0A0D9QZD3	A0A0D9QZD3	A0A0D9QZD3_CHLSB	LRRC59		86287.5	97329.5	95552.8	73075.5	93774.9	106262	154403	80795.5	98267.9	95198	65760.8	65328.2	117898	137567	142588	100177	149463	176968	94130.2	97346.6	104297	104049	74235.9	90681.9	126411	83685.7	99718.8	84316.3	85856.4	88844.7	122695	137024	190692	85552.4	89758.1	97012.4	157624	141538	113002	102552	104200	95075.5	79027.2	82182.1	120937
A0A0D9QZD6	A0A0D9QZD6	A0A0D9QZD6_CHLSB	SUFU		3247.15	5782.97	4418.26	4564.21	4766.69	4779.33	4525.95	5587.97	3779.74	4938.23	5118.6	4207.66	4265.39	4297.69	4086.98	5422.21	5181.89	4270.42	5028.87	4834.32	4623.87	5396.04	5829.34	4711.67	4803.68	5416.79	3220.71	4630.12	4457.53	4702.62	4093.91	4775.76	4541.94	5241.4	5155.12	2449.67	4318.35	5115.83	2885.68	5894.7	5072.01	5825.01	3359.4	4528.69	4391.19
A0A0D9QZD7	A0A0D9QZD7	A0A0D9QZD7_CHLSB	CAT		21704.2	17222.4	18822.3	18855.6	18489.5	18073.9	15511.2	15053.8	16047.5	17464.7	17911	16367.4	19172.3	16584.2	17463.3	19905.7	18370	17920.9	17937.1	16302	17373.2	18197	16574.3	16812.5	18582.4	14575.7	14516.1	20652.4	17013.4	18214.1	20201.9	16564.6	18558.6	19054.4	18366.3	16364.3	18335.3	16530.5	15699.5	17654.1	14148.4	13860	18024	17014	16980.4
A0A0D9QZD8	A0A0D9QZD8	A0A0D9QZD8_CHLSB	ACTR1A		57877.8	53243.3	56622.7	53717.9	55684.4	57609.1	57003.7	48583.9	51456.6	53052.7	53384.1	54657.1	59236.7	50638.2	57132.9	53576.7	47802.2	55260.3	53975.8	50349.1	54310.9	56267.1	58549.1	52429.9	56868.6	52620.7	54634.6	56914.2	52715.6	61511.9	52888.5	44760.6	50252	50529.8	52635.4	43675.2	52148.1	52245.6	49333.6	57165.9	50320.2	53685.2	48810.7	53172.9	55293.7
A0A0D9QZD8;A0A0D9RXH9	A0A0D9QZD8;A0A0D9RXH9	A0A0D9QZD8_CHLSB;A0A0D9RXH9_CHLSB	ACTR1A;ACTR1B		48340.2	51914	44795.3	46208.9	49800.6	50344.2	48406.4	52786.7	42064	54086.9	60390.7	53420.2	39674.8	45531.9	48338.3	62599.3	52780.3	48198.1	58281.9	55498.6	55578	53027.3	57044.1	52880.5	48571.8	56001.7	48512.7	60867.8	58032.9	48098.2	50376.4	59402.6	50568.2	60725.2	64646.9	42964.7	51436.8	56594.7	43465.2	55476.8	49023.5	49555.8	60017	62363.8	50759.1
A0A0D9QZD9	A0A0D9QZD9	A0A0D9QZD9_CHLSB	N4BP1								937.52		582.923			855.862	913.715					808.075		1152.73		449.106		1056.59		659.046				768.026														757.526	1045.58
A0A0D9QZE0	A0A0D9QZE0	A0A0D9QZE0_CHLSB	ACSF2		11611.6	9529.31	11968.3	10329.1	10667.2	12148.6	10390	10202.7	10897.8	9526.81	12847.7	10094.6	10988.1	10660.7	12965.5	12226.9	11426.1	13150.9	11144	11183.8	11191.7	9766	9518.84	10691.5	10980.4	9774.56	9767.38	10020.9	10905.9	11275.7	10754.1	10287	12325.3	10954.1	10425.6	9155.98	10921.6	9003.62	8235.58	10155.3	8112.24	6103.49	12164.2	11612	10909.8
A0A0D9QZE6	A0A0D9QZE6	A0A0D9QZE6_CHLSB	LONP2		3434.33	2943.4	4086.92		2835.88	3087.37	2787.34		1869.12				1609.39	2413.55	1797.46	2831.36	4800.65	3594.15	3849.27	2897.46	3954.65		2480.82	3007.74	1471.45			1729.13			3805.79		3891.44		2358.94	2731.17	2714.74		2522.49	2325.11			2154.27		1638.58
A0A0D9QZE7	A0A0D9QZE7	A0A0D9QZE7_CHLSB	APIP		6095.42	3819.85	4872.05	5578.8	5573.26	5886.78	4935.24	3861.3	5299.88	6387.58	5581.12	4551.23	6016.83	3842.94	4965.79	5481.01	3608.1	4903.13	4943.09	4296.1	5418.01	5343.73	5272.44	5300.16	6555.18	5320.86	6384.92	6089.78	6451.81	6543.19	6645.62	4722.67	6232.37	5337.25	4720.69	5449.85	5306.07	4222.31	5202.89	6036.65	6746.13	4383.45	6222.04	4795.9	6037.62
A0A0D9QZF0	A0A0D9QZF0	A0A0D9QZF0_CHLSB	ABCC11		15976	9159.13	14301.9		11207.7	12781.9	13552.6	7174.14	11396.1			10355.5	10940.6	11284	15069.3	16733.7	13970.5	11588.1	9509	15567.7	10308.8	9329.07	13441.5	9612.27	10563	10823.3		10693.9	14929.2	5186.8		17400.8	9597.28	10256.8	12043.7	10473.7	6641.33	11119.5				13713.2	28398.2	14192.1	12727
A0A0D9QZF1	A0A0D9QZF1	A0A0D9QZF1_CHLSB	HNRNPA1		239318	174241	192008	245388	213644	233009	227192	146223	212585	224590	179010	247801	238071	196797	225746	216085	169934	215294	214946	177818	231888	241974	222483	218298	232388	208524	259154	192642	222930	222081	249704	155070	216350	250044	190278	169159	228103	201443	169141	246155	185270	209528	208842	209417	252039
A0A0D9QZF1;A0A0D9QXK8;A0A0D9S940;A0A0D9SAF5;A0A0D9SC01	A0A0D9QZF1;A0A0D9QXK8;A0A0D9S940;A0A0D9SAF5;A0A0D9SC01	A0A0D9QXK8_CHLSB;A0A0D9QZF1_CHLSB;A0A0D9S940_CHLSB;A0A0D9SAF5_CHLSB;A0A0D9SC01_CHLSB	HNRNPA1		3293.13	3224.02	3088.4	6438.46	4111.35	3907.28		1582.99								3822.58	2928.82	2538.06	4447.19	4443.7	3046.22	1955.04		2163.72							2812.92	2462.89	2476.92	3120.34	3633.92	2505.86				1220.87				794.815
A0A0D9QZF1;A0A0D9R241;A0A0D9SBB0;A0A0D9RCV5;A0A0D9RGH3;A0A0D9RPE9;A0A0D9RQM1;A0A0D9SED0	A0A0D9QZF1;A0A0D9R241;A0A0D9SBB0;A0A0D9RCV5;A0A0D9RGH3;A0A0D9RPE9;A0A0D9RQM1;A0A0D9SED0	A0A0D9QZF1_CHLSB;A0A0D9R241_CHLSB;A0A0D9RCV5_CHLSB;A0A0D9RGH3_CHLSB;A0A0D9RPE9_CHLSB;A0A0D9RQM1_CHLSB;A0A0D9SBB0_CHLSB;A0A0D9SED0_CHLSB	HNRNPA1;HNRNPA3		17028.4	3535.46	6305.08	12944.6	19857.6	21531.9	48224.2	12372.2	48157.1	76566.7	18412.6	18778.1	70333.8	16783.4	38335.8	23735.7	18467.4	32016.3	18746.7	5936.63	48427.2	27487.3	24801.8		94559.6	32068.5	103159	32721.9	21903.5	37981.3	33724.6		44316.4	36994	15014.8	75740.3	61091.3	24420.6	126630	43054.3	74679.7	106942	58571	13786.8	34505.5
A0A0D9QZF1;A0A0D9RCV5;A0A0D9S940	A0A0D9QZF1;A0A0D9RCV5;A0A0D9S940	A0A0D9QZF1_CHLSB;A0A0D9RCV5_CHLSB;A0A0D9S940_CHLSB	HNRNPA1		21460.4	17888.3	15638.9	22823.9	20984	19830.6	16678.7	21853.9	17992.9	18686.8	21198.2	25868.6	15633.2	16639.3	18001.7	19281	14008.2	17706	13581.5	17616.5	18279.7	21784.3	22056.1	20027.1	21142.6	16194.5	16905	17543.5	17723.8	16281.1	17102.9	25224.7	19190	23051.2	25753.3	19503.2	23690.9	26324.7	21245.1	18582	6098.3	11721.9	21212.7	26457	25916.9
A0A0D9QZF1;A0A0D9RNX3;A0A0D9QYM4;A0A0D9SBB0;A0A0D9RCV5;A0A0D9S940;A0A0D9SC01;A0A0D9SED0	A0A0D9QZF1;A0A0D9RNX3;A0A0D9QYM4;A0A0D9SBB0;A0A0D9RCV5;A0A0D9S940;A0A0D9SC01;A0A0D9SED0	A0A0D9QYM4_CHLSB;A0A0D9QZF1_CHLSB;A0A0D9RCV5_CHLSB;A0A0D9RNX3_CHLSB;A0A0D9S940_CHLSB;A0A0D9SBB0_CHLSB;A0A0D9SC01_CHLSB;A0A0D9SED0_CHLSB	HNRNPA1;HNRNPA2B1		3234.17	2921.77	4248.21	2935.57	4003.66	3132.4	4485.99	3397.34	2422.3	5665.75	3997.36	3327.81	3835.79	3505.57	2759.55	1714.05	2373	2671.95	2703.85	1672.37	2162.35	2766.19	3816.89	2920.81	2482.49	1340.1	2114.28	3310.65	1883.73	3630.49	2548.39	1012.99	2770.63	3483.37	2321.6	2897.96	3253.82	2888.67		2920.91		4419.28	1916.08	1543.74	1969.11
A0A0D9QZF1;A0A0D9S940	A0A0D9QZF1;A0A0D9S940	A0A0D9QZF1_CHLSB;A0A0D9S940_CHLSB	HNRNPA1		270726	300152	314767	360372	321345	328830	314688	324940	259120	317794	360169	358326	317124	325984	341833	356088	325667	320305	373997	335507	314885	350370	331281	365299	274724	392782	288565	307864	345566	299531	306117	319018	323180	384151	333037	194614	305296	315981	234334	341650	343480	254177	394457	367409	301943
A0A0D9QZF1;A0A0D9S940;A0A0D9SC01	A0A0D9QZF1;A0A0D9S940;A0A0D9SC01	A0A0D9QZF1_CHLSB;A0A0D9S940_CHLSB;A0A0D9SC01_CHLSB	HNRNPA1		1967.58	3508.43	3048.48	3563.93	2183.92	3049.73	1010.67	3821.06	3274.76	3742.89	4042.67	2977.52	3524.41	3090.21	1881.61	1981.24	2481.97	2728.83	3748.16	3108.2	2360.07	2889.79	2719.48	2553.86	2717.23	2315.06	2470.21	3127.66	2714.06	3188.53	2157.88	3019.91	2030.19	1718.08	2814.05	1908.69	2674.86	3362.04	2980.19	3096.46			2708.58	4129.09	3493.97
A0A0D9QZF1;A0A0D9SAF5;A0A0D9SED0	A0A0D9QZF1;A0A0D9SAF5;A0A0D9SED0	A0A0D9QZF1_CHLSB;A0A0D9SAF5_CHLSB;A0A0D9SED0_CHLSB	HNRNPA1		1392.59	2659.33	2662.28	2341.43	2592.37	2395.35	2261.56	3095.73	1802.44	2319.2	2551.89	3126.44	2243.99	2891.46	2040.93	1862.07	2560.45	2701.01	3352.91	2406.32	2351.37	3379.29	3158.1	2678.45	1646.59	1461.4	1392.99	2253.75	2191.34	3051.33	2372.53	3025.62	1803.33	2261.87	3051.16	1505.82	3166.23	3129.98	1596.99	2091.85		2105.54	2899.26	2401.97	1838.52
A0A0D9QZF1;A0A0D9SBB0	A0A0D9QZF1;A0A0D9SBB0	A0A0D9QZF1_CHLSB;A0A0D9SBB0_CHLSB	HNRNPA1		304891	307649	260104	292270	266255	311479	298117	280827	334976	369557	320712	339157	334717	317052	343279	347016	265468	313297	341922	310023	349501	308116	299242	329397	307583	309796	326724	334421	341458	309418	345183	254984	295092	345461	263809	292398	287589	271887	243660	336704	318424	281933	282279	321273	327985
A0A0D9QZF1;A0A0D9SBB0;A0A0D9QXK8	A0A0D9QZF1;A0A0D9SBB0;A0A0D9QXK8	A0A0D9QXK8_CHLSB;A0A0D9QZF1_CHLSB;A0A0D9SBB0_CHLSB	HNRNPA1		13684																																9957.38								178707	89281.2
A0A0D9QZF1;A0A0D9SBB0;A0A0D9RCV5;A0A0D9SAF5	A0A0D9QZF1;A0A0D9SBB0;A0A0D9RCV5;A0A0D9SAF5	A0A0D9QZF1_CHLSB;A0A0D9RCV5_CHLSB;A0A0D9SAF5_CHLSB;A0A0D9SBB0_CHLSB	HNRNPA1		51805.3	28040	30995.7	38723	38421.9	39585.1	36392.6	26861.2	51206.4	62543.4	39939.6	40098.2	50743.2	49071.7	53827.7	33547	24658.2	36796	30794.1	27818	38332.7	44221.5	36949.7	49856.4	44285.3	33452.2	48252.2	55527.6	36631.9	50026.7	44631.8	17760.1	39722.8	39534.3	30333.7	37880.2	48056.7	34455.5	68353	48153.8	66932.1	72279.4	34020.3	40470.3	43325.3
A0A0D9QZF1;A0A0D9SBB0;A0A0D9RCV5;A0A0D9SED0	A0A0D9QZF1;A0A0D9SBB0;A0A0D9RCV5;A0A0D9SED0	A0A0D9QZF1_CHLSB;A0A0D9RCV5_CHLSB;A0A0D9SBB0_CHLSB;A0A0D9SED0_CHLSB	HNRNPA1		84207.4	73800.6	99476.3	109395	108243	109476	78912.1	108309	94121.6	78659.9	124650	117292	90198.7	110898	108837	108015	94365.7	103303	117864	95942.5	94914.7	97990.1	104258	107984	86904.9	101604	90165.9	100792	118144	103020	100533	81701.6	100156	100422	106218	85079.9	102844	96626.5	58651.9	93965	58828.7	73217.6	95760	108580	111629
A0A0D9QZF1;A0A0D9SBB0;A0A0D9S940;A0A0D9SAF5;A0A0D9SED0	A0A0D9QZF1;A0A0D9SBB0;A0A0D9S940;A0A0D9SAF5;A0A0D9SED0	A0A0D9QZF1_CHLSB;A0A0D9S940_CHLSB;A0A0D9SAF5_CHLSB;A0A0D9SBB0_CHLSB;A0A0D9SED0_CHLSB	HNRNPA1		60806.9	35738.9	49422	63439.1	78193.3	85342.9	102806	59638.2	115685	126094	68062	67267.7	131286	57549.7	99728.6	55265.4	54653	57244.8	53465.1	27110.6	95629.7	100887	83897.3	99380.9	118858	53085.2	100382	95132.1	71111.5	114520	90454.9	31507.5	87731.6	97728.7	53957.9	137949	102917	61575.4	163841	96326	71921.3	98236.7	54918.6	57719.2	92266.8
A0A0D9QZF1;A0A0D9SBB0;A0A0D9S940;A0A0D9SED0	A0A0D9QZF1;A0A0D9SBB0;A0A0D9S940;A0A0D9SED0	A0A0D9QZF1_CHLSB;A0A0D9S940_CHLSB;A0A0D9SBB0_CHLSB;A0A0D9SED0_CHLSB	HNRNPA1		15125	17295.4	14652.5	13888.2	16392.1	18763.4	12373.5	18949.7	10378.7	16621.4	18188.7	14638.1	14444.6	15722.7	16728.3	16869	14137.7	18284.5	19987	17250	13772.2	15850.6	15800.8	18184.1	14296.5	18882.3	13926.2	14125.7	16433	16067.9	19047	17707.5	12949.9	17716.8	14786.1	14024.3	15408.2	16685	15821.7	14289.8	11767.1	12340.4	19506.8	15510	16702.7
A0A0D9QZF1;A0A0D9SBB0;A0A0D9SAF5	A0A0D9QZF1;A0A0D9SBB0;A0A0D9SAF5	A0A0D9QZF1_CHLSB;A0A0D9SAF5_CHLSB;A0A0D9SBB0_CHLSB	HNRNPA1		20413.9	13697.7	16374.1	17448.8	19944.9	19844.5	15440.2	15786.1	13665.8	14249.4	13218.8	17999.9	19466.8	17317.4	19396.7	17765.7	16134.4	17255.8	14842.2	15965.9	16992.8	16808.5	18719.6	20353.4	15651.5	20012.2	10962.4	16721.7	17730.2	17778.2	10980.6	11964.2	16249.8	17658.7	15891.3	10370.6	15794.4	17434.3	14745.5	18499.1	11893.5	12378.9	17564.2	17284.3	17202.8
A0A0D9QZF1;A0A0D9SBB0;A0A0D9SED0	A0A0D9QZF1;A0A0D9SBB0;A0A0D9SED0	A0A0D9QZF1_CHLSB;A0A0D9SBB0_CHLSB;A0A0D9SED0_CHLSB	HNRNPA1		443439	93669.8	191864	215087	240023	255398	350595	111101	322370	335276	185985	165492	192655	145048	217535	247140	203598	278794	244287	94169.9	390368	241651	200871	221314	304625	211477	367497	181291	134748	162584	311086	88945.1	291307	281511	129346	555325	202833	114554	429657	242696	335430	392351	315097	110632	174459
A0A0D9QZF2	A0A0D9QZF2	A0A0D9QZF2_CHLSB	PDHX		10966.7	4250.16	6906	9502.47	8717.95	9255.71	10009.7	5645.08	10357.7	10780.8	8470.61	6992.81	8435.73	9430.52	8790.76	9584.18	6550.19	8654.09	10857.5	8162.25	10544.6	10222.2	8401.71	8565.7	10418.7	7855.76	9470.51	10189.7	9674.82	6740.92	9699.45	9476.97	9770.06	12043	8666.59	10327.5	11527.4	7888.79	7430.77	10237.1		8646.37	8727.23	10947.6	9951.06
A0A0D9QZF4	A0A0D9QZF4	A0A0D9QZF4_CHLSB	FBXL15		2963.88	2853.89	3300.41	3368.07	3419.66	3606.44	3433.51	3637.7	2397.55	3202.02		3715.34	2213.13	3385.7	2679.18	4598.16	2364.55	3637.03	3581.14	2055.98	3238.23	4168.02	4343.24	3705.29	3251.13	4105.23	2811.87	3091.76	2734.91	2572.22	3626.5	2438.22	3008.21	3733.63	3139.18		2249.14	2467.81	2285.57	2693.63		2263.94	2782.39	3099.34	2704.41
A0A0D9QZF5	A0A0D9QZF5	A0A0D9QZF5_CHLSB	CD44		118276	65090.2	108199	88769.4	90349.7	93074.5	112972	46162.9	82351.2	102318	79165.8	75752.1	111232	95600.5	106959	114897	129894	129550	117027	86892.6	86553.4	94137.8	65562.4	69500.2	115666	89302	96694.5	87063	79111.7	70801.9	138985	87841.9	142354	101668	82421	105488	111519	85220.4	89837.3	110702	73195.2	87517	74225.2	56138.4	84529.7
A0A0D9QZF6	A0A0D9QZF6	A0A0D9QZF6_CHLSB	CUEDC2		7104.85	5828.78	5553.35	4751.05	6102.77	6755.9		2790.2	5106.51	6471.79		3375.88	4701.18		5150.17	6204.88	4806.6	5117.38	6206.19	4787.65	5838.05	5731.94	4546.65	5303.85	5176.64	4035.53	5504.22	4634.81	3752.21	5201.68	6975.03	4880.78	7174.98	6236.1	4948.36	7916.53	5260.5	3849.99	6485.34	3489.4		4004.27
A0A0D9QZF9	A0A0D9QZF9	A0A0D9QZF9_CHLSB	PARVB		35567.2	46652.2	31688.7	45426.2	54204.6	36630.9	38475.7	42755.8	28446.5	25724	37149.4	35462.9	34955.4	37629.7	30973.1	32907.5	36201.9	30307.3	38153.8	46096.5	35962.5	37948.1	42784.8	35099	32813.2	25600.3	18859.5	34769.6	33792.1	36167.1	35894.6	44952.3	34069.9	35628.3	45407.3	22750.3	40363.4	45270.5	26493.6	32526.8	10999.3	14868.8	16927.6	31196.7	31028.1
A0A0D9QZG1	A0A0D9QZG1	A0A0D9QZG1_CHLSB	CBX5		26599.7	25370.4	24631.6	28924.7	27304.2	27274.7	26148.2	23189.9	25440.3	23015.1	24704.8	26174.4	27447.5	24650.1	22592.3	27612.8	26315.2	23694.8	26677.3	25314.4	23556.5	25096.6	28942.5	26831.5	24038.6	22345.4	25218	24242.9	26435.4	24971.1	23630.8	21658.2	23286.4	25264.9	27145.7	28326.8	25980.8	25605.4	25592.8	23993.9	25195.6	24168.2	23417.3	26956.6	25065.7
A0A0D9QZG1;A0A0D9RNX8	A0A0D9QZG1;A0A0D9RNX8	A0A0D9QZG1_CHLSB;A0A0D9RNX8_CHLSB	CBX3;CBX5		62677.2	66451.3	61771.9	80751.8	67596.7	66938.7	54259.7	44418.5	49402.6	50114.8	65740.1	64520.8	42792.4	39415.6	36927.9	59453.5	51223.9	41700.4	54974.8	58358.2	53066.3	52880.3	55263.1	50889	35863.3	48308.2	38920.7	40790	42356.6	37473.3	48062.2	42707.6	39723.6	54487.8	45218.4	31234.3	35430.2	39126.7	24774.1	39765.4	20902.7	30309	33733.1	32434.2	26664.5
A0A0D9QZG3	A0A0D9QZG3	A0A0D9QZG3_CHLSB	SMUG1		915.722	985.555	1327.31	794.443	1468.06	1554.25	1212.47	784.804	1409.76	906.85	957.637	1088.33	1083.45	1168.91	1034.61	1650.05	1443.84	1668.51	1817.05	1300.34	1478.71	1094.4	552.491	999.358	1419.01	1176.75	1451.22	1374.53	1114.98	1459.83	1142.07	1332.91	1184.29	1897.12	1266.64	367.886	1419.65	1499.64	753.376	1731.02		1488.98	1770.86	1050.58	1211.31
A0A0D9QZG4	A0A0D9QZG4	A0A0D9QZG4_CHLSB	NFKB2		23266.7	23528.7	26371.6	21619.2	24845.3	23055.3	21206.2	22939.1	21191	20404.2	23186.6	23630.8	22397	23106	21421.8	22547.1	26188.2	23428.2	20888.2	24135	21902	22873.2	25000.2	24231.5	20163.8	21220.2	19579.3	22889	23740	24115.8	23742.5	24814.3	22246.2	23258.8	23743.5	21334.6	22168.5	21962.5	20011.1	21761	18155.4	17024.4	21301.3	25676.6	24580.3
A0A0D9QZG9;A0A0D9S620	A0A0D9QZG9;A0A0D9S620	A0A0D9QZG9_CHLSB;A0A0D9S620_CHLSB	EPN1;EPN3		6929.36	7935.47	6274.36	9401.97	5541.02	5740.14	4717.31	8249.09	5263.99	5277.6	6391.48	7646.67	6668.98	9325.98	5576.33	6174.29	6050.69	4921.81	5622.77	7643.82	4452.51	5652.44	6722.82	7032.51	5403.83	6029.17	4495.24	7419.2	6351.39	5657.74	5475.33	5948.3	4494.36	5153.59	8000.57	5216.54	4777.83	6725.74	3963.61	5613.88		2043.69	4231.14	7960.74	5945.23
A0A0D9QZH2	A0A0D9QZH2	A0A0D9QZH2_CHLSB	GBF1		6693.64	5780.35	6366.23	6568.47	6360.4	6885.44	7201.05	6706.04	7207.82	6840.45	5857.86	6128.74	6140.34	7464.56	6287.53	6944.81	6669.38	7900.05	6681.9	6520.38	6888.06	6550.13	6150.41	6915.45	6766.26	5773.61	6124.33	5467.37	6227.04	7053.66	6760.96	5974.94	7541.42	6356.38	6179.69	6137.43	6305.89	6762.56	6633.87	7038.46	6393.1	5701.42	5866.21	6688.91	6663.93
A0A0D9QZH3	A0A0D9QZH3	A0A0D9QZH3_CHLSB	SPATA20		10129.8	6357.61	7463.97	6523.15	7113.02	7707.54	8797.16	3047.28	7916.65	7881.58	5165.05	6960.61	8510.79	8576.74	10008.5	8239.5	7766.47	9788.32	8922.89	8403.58	9726.75	8056.35	7784	8279.12	8076.73	7625.21	6837.87	6460.84	8360.05	8448.53	11072.4	7954.69	9420.25	8092.35	7041.27	8040.08	7873.5	5685.51	7125.22	7884.01	12090.7	9160.66	7504.65	7637.54	9482.95
A0A0D9QZI2	A0A0D9QZI2	A0A0D9QZI2_CHLSB	CCDC124		56388	46128.3	53278.3	49103.5	44767.6	47568	46413.8	60538.3	49042.4	43752.4	49690.9	45594	49186.2	41891.6	45586.7	63647.9	48830.2	49676	49944.9	46157.6	44973.9	50339.1	51830.9	50552.5	43904.4	42092.1	35074.1	51511.4	45284.5	47202.1	54810.4	39157	47609	50264.7	41535.5	38456.8	46542.2	46742.1	38697.3	49118.2	37782.1	33858.5	52649.4	46000.4	46075.1
A0A0D9QZI5	A0A0D9QZI5	A0A0D9QZI5_CHLSB	NOLC1		17400	18595.1	18340.5	21913.3	19655.9	20126.7	18217.4	18123.9	16832.5	19950.7	18834.6	19923.7	15397.8	19623.8	15334.8	18728	18774.4	18203.5	17191.4	21766.6	19500.8	20892.7	13994.5	16068.7	18315.8	21110.8	17984.8	16792.6	19880	16420.1	16226.7	22260.7	19466.3	22003.8	19354.9	18699.2	19794.2	18425.4	15405.7	18429	7800.04	7938.82	23002.9	18247.9	19107.4
A0A0D9QZI5;A0A0D9RS58	A0A0D9QZI5;A0A0D9RS58	A0A0D9QZI5_CHLSB;A0A0D9RS58_CHLSB	NOLC1		21870.2	21363.6	24776.5	17805.8	19399.5	20589.5	23681.2	18632.8	20633.3	23141.2	16223.8	19155.5	27010.3	17760.1	22815.6	19659.7	23326	19068.5	23707.4	24846.2	22723.3	18939.8	22090.4	17988	21329.5	24394.5	30255.9	15281.8	18870.7	19080.4	18219.4	22818.7	23270.6	22819.9	26451	27122.5	24053.7	14615.4	24287.5	15587.9	24401.5	25465.3	19667.9	18575.9	21519.2
A0A0D9QZI6	A0A0D9QZI6	A0A0D9QZI6_CHLSB	CALCOCO1					1821.45	1747.01	1879.62	1804.72		1777.27					1524.06		1749.11	1917.28		1575.58		1691.62	2298.11	1766.08	2188.69	1249.41				1786.92			2466.27	1778.08	850.861		1269.83		1589.15	2184.47
A0A0D9QZI9	A0A0D9QZI9	A0A0D9QZI9_CHLSB	RPL18A		90188.5	56455.2	106665	117627	85625.9	95867.5	109674	56304.7	104377	113514	92266.5	72376.5	92554.7	79848.2	98188.6	100146	101380	111443	122735	50211.1	102534	116690	109904	111976	108613	111848	117262	84383.7	89084.2	93227.9	105767	80571.5	111239	112328	80749.1	125798	112069	80978	101110	121616	119999	133732	66469.6	72981.8	89546.8
A0A0D9QZI9;A0A0D9SE37	A0A0D9QZI9;A0A0D9SE37	A0A0D9QZI9_CHLSB;A0A0D9SE37_CHLSB	RPL18A		64242.4	34445.9	43708.3	47400.3	37084	43369.7	55074.8	32272.4	50719.2	60615.7	41285.6	35605.1	39111.8	35461.2	39307.4	43958.6	44173.3	46135.3	49599.1	37632	47291.1	52168.3	39478.4	41939.2	61544.4	48383.7	49608.6	43424.6	42535.4	31020.6	52720.6	49464.8	49249.3	52850.1	36713.7	46151.9	61972.6	43931.7	62804.9	53162.6	37215.5	53555.6	32633.9	28042.3	32245.6
A0A0D9QZJ1	A0A0D9QZJ1	A0A0D9QZJ1_CHLSB	TRIM44		1786.88	2276.56	2150.96	1998.81	1820.31	1362.24	2124.35	1683.99	2089.47		1232.04	1764.15	1540.9	1198.31		1915.45	1992.6	1618.21	1656.71	1693.01	1358.46	1664.31	1876.62	1821.76	1440.72	1745.92	484.412		1569.98	1335.17	1483.99	1631.21	1839.55	1569.02	2469.86	3225.24	1339.58	1318.62	1847.59	1788.99		4778.7	1021.12	1405.06	1391.28
A0A0D9QZJ2	A0A0D9QZJ2	A0A0D9QZJ2_CHLSB	ATF7			1766.38	1008.26			1257.93		1115.98		2978.52			4550.38			1227.18			1796.67	1340.5	3566.13	725.735	1296.57	940.075	4219.52	932.85						1617.05		1757.63	1470.64	808.707	1127.03	1000.04
A0A0D9QZJ6	A0A0D9QZJ6	A0A0D9QZJ6_CHLSB	COMMD9		11402.2	12915.7	12288.9	11815.9	12175.7	11819.8	9659.83	12474.6	10003.4	9266.25	9853.17	12112.2	10854.2	9534.23	10979.7	8770.54	12284.6	11460.4	11015.8	11848.5	10730.3	9869.34	11375.4	10176.1	9905.21	11379.5	9830.62	9905.68	11098.7	10938.5	10275.6	13095.1	10761.1	13929.9	13131.4	9147.61	12247.1	10732.1	8841.52	12609.6	4263.55	8469.17	8649.15	10117.4	10583.3
A0A0D9QZK0	A0A0D9QZK0	A0A0D9QZK0_CHLSB	TARBP2		10367.8	12207.4	9477.95	10450.5	10857.6	10727.1	11144.4	10786.9	9987.58	10853.7	11928.4	11513.3	10584.6	10036.4	11297	10433.2	11173.8	9663.57	10608.6	11954.2	10180.2	12094.1	10795.2	10256.2	10814.4	11719.4	10323.5	10955.4	9389.79	11175.9	9079.94	10477.7	10156.7	9796.54	12057.6	9352.83	10499.7	11792.7	10160.5	9509.81	8935.07	9696.29	10853.7	11906	11323.6
A0A0D9QZK1	A0A0D9QZK1	A0A0D9QZK1_CHLSB	ABCC3		9291.89	10276.2	9923.81	8553.49	9222.85	8405.74	10598.4	7933.05	7385.9	8569.43	8982	8832.67	12164.4	11966.8	11855.6	10432.9	11477.5	11965.8	8806.42	7806.9	7354.83	9140.28	7876.14	8558.08	10750.8	9093.68	9169.29	7100.24	8796.71	8519.89	9977.56	10680.4	13516.8	9190.13	8066.45	8513.11	10116.3	12103.3	9068.36	9820.38	9106.83	8873.79	7041.43	8167.86	8591.38
A0A0D9QZK2	A0A0D9QZK2	A0A0D9QZK2_CHLSB	TRAF6		1787.87	2430.53		2418.4	3805.81		2570.76	2843.01	2369.57	3509.41		3429.18	2448.33	3395.94	2744.18	3059.39	2522.55	3145.18	3173.95	3069.51	3331.87	3387.3	3238.65	3096.78	2675.85	3258.39	4235.81	3424.87		3671.44		3343.82	2829.17	3705.26	4153.35	3103.26	3852.63	4222.23	2183.92	3555.86	4775.92	4112.72		4223.55	4291.15
A0A0D9QZK6	A0A0D9QZK6	A0A0D9QZK6_CHLSB	ANKRD40		5016.62	5848.3	4728	6481.48	5724.94	6215.36	6236.02	4771.1	5410.7	4823.7	5390.87	6095.25	4576.47	3997.94	4624.96	5108.44	5456.04	4702.09	4765.59	5917.93	5375.16	4717.09	5008.4	4657.78	4734.15	5468.62	6257.3	4882.43	4072.55	4787.35	4829.8	5982.53	5621.57	6470.64	6902.49	4560.83	4753.5	4609.52	4975.76	4412.18	3463.34	3983.95	5621.63	5946.6	5305.88
A0A0D9QZK7	A0A0D9QZK7	A0A0D9QZK7_CHLSB	LUC7L3		27794.7	28701.7	30480.2	30514.9	32615.4	28737	26571.6	30557.3	32365.6	30309.5	32403.8	30209.5	32197.8	32248.4	32043.5	29590.8	30196.3	26615.8	32065	22178.3	29264.7	29564.1	30518.9	33530	31663.9	38788.6	32806	33027.8	35266	34839.8	30388.3	24224.4	30183.4	34842.7	32113.9	31635.1	31930.6	28754.2	29562.8	37563.6	20509	23239.5	33585.3	34164.5	30545.3
A0A0D9QZK8	A0A0D9QZK8	A0A0D9QZK8_CHLSB			416739	498330	521570	622681	557841	501575	478993	683581	510073	492754	609546	536959	458086	536355	405104	505647	540371	456572	547506	583991	498837	540013	626495	600814	446764	548446	440652	526726	496855	499139	486829	526633	479508	534669	560156	489171	433192	500020	351664	531482	439131	354450	581003	587929	521235
A0A0D9QZK8;A0A0D9R514;A0A0D9RXB8	A0A0D9QZK8;A0A0D9R514;A0A0D9RXB8	A0A0D9QZK8_CHLSB;A0A0D9R514_CHLSB;A0A0D9RXB8_CHLSB			32276.4	9435.41	15401.2	20060	15913.2	23297.2	28372.9	6547.61	31455.6	42836.7	15430.6	12964.1	19749.5	21457	18650	32964.4	13694.1	28077.5	34551.1	12674.2	43941.1	32802.9	23733.6	28224.4	30194.5	36337	39490.4	47082.9	20770.1	33208.4	39527.7	14659.4	36501.3	47634.3	18643.8	44123.5	36107.2	9713.39	55829.7	65800.1	51104	63967.3	56722.2	22011.8	48794.4
A0A0D9QZK8;A0A0D9RXB8	A0A0D9QZK8;A0A0D9RXB8	A0A0D9QZK8_CHLSB;A0A0D9RXB8_CHLSB			62901.3	13394.3	49664.3	72009.4	59240.9	78136.8	92996.3	24116	92273.9	64588.4	63972.7	43129.3	88478.4	54296.1	83846.3	90851.2	51613.8	92822.3	86117.5	19774.7	87477.3	85748.1	78480.2	101162	96749.4	87794.3	107007	98165.9	76399.8	109219	94912.4	31404.5	85681	99500.6	67064.8	83496.6	87305.2	49438.7	131740	117287	82292.7	100676	91453.6	60560.4	65337.9
A0A0D9QZK9	A0A0D9QZK9	A0A0D9QZK9_CHLSB	ARMH3		3105.6		1026.38	2198.32		2218.57			2379.07	2937.7			2811.5		2805.77	2556.96					1956.56	1970.65	2250.3	1998.18	2749.1	2083.1	2452.84	1845.13	2173.54	2995.94	3348.24		4074.57	2957.94	1358.06	2345.57	2970.55		3408	3153.15	2702.04	3316.33			3114.4
A0A0D9QZL5	A0A0D9QZL5	A0A0D9QZL5_CHLSB	IFTAP		2164.2	1816.21	3303.56	2559.58	2460.29	2171.17	1419.04	2121.46	1648.51	1419.63	2003.42	1962	2541.13	2078.26	1299.77	2018.51	2134.99	2804.81	1796.16	1999.21	2645.38	2330.86	2171.49	2696.59	1979.23	1971.16	1214.44	2683.7	3128.57	1602.39	1991.01	1844.35	2252.22	2203.42	2069.49	1531.96	1823.88	2494.13	1299.78	2166.32			1360.05	1681.39	1805.59
A0A0D9QZL7	A0A0D9QZL7	A0A0D9QZL7_CHLSB			16285.6	6803.67	8081.42	7259.3	8257.66	7740.96	8410	6166.6	9004.63	8550.6	7226.64	8945.6	6504.32	6228.93	6306.14	8077.98	8376.78	9847.87	6463.08	7263.47	8728.18	7221.35	6344.46	9073.08	8669.26	7094.42	11349.2	6631.13	9074.23	9929.7	9555.75	6668.08	11551.8	7985.64	6617	14093.7	8180.54	8288.43	12982.6	9153.81	13782.6	13733.9	8371.54	9940.75	10110.2
A0A0D9QZL7;A0A0D9RFZ9	A0A0D9QZL7;A0A0D9RFZ9	A0A0D9QZL7_CHLSB;A0A0D9RFZ9_CHLSB			7574.91	4893.19	6244	5425.8	5172.53	5353.05	6483.24	5679.12	5816.17	5675.43	4860.56	5794.06	4992.7	5968.47	6753.05	6846.16	5854.14	6040.94	6350.09	5383.78	6474.01	7458.18	6811.45	6259.44	4794.64	7138.66	7372.95	5576.17	6632.74	5331.97	4841.78	5326.66	5713.02	6406.75	3808.67	7942.29	5881.23	4661.75	4965.42	4777.43	6669.23	6930.8	7284.31	6354.37	7959.43
A0A0D9QZL8	A0A0D9QZL8	A0A0D9QZL8_CHLSB	API5		25375.5	27925.9	27728.3	26062.9	28196.2	27635.1	27774.6	29757.1	27146.4	29747.6	22829.1	26393.6	26363.5	23714.6	28777.6	25055.2	25727.6	28124	25184.8	27897.1	29483.9	26523.3	24142.2	26585.5	27703.5	22044	26684.5	24764.6	26079.5	26394.4	22356.3	27295.9	30648.4	30406	25268.5	31291.5	28981.9	26100.2	25219.4	27384.5	26868.5	31799.5	25307.4	25372.6	28200.5
A0A0D9QZL9	A0A0D9QZL9	A0A0D9QZL9_CHLSB	SP1		1623.68	532.542	1637.97	1331.76	1823.4	1474	1395.1	1551.3	1637.78	1374.63	1769.39	1516.57	2151.07	1691.12	1446.05	1508.98	2169.74	1362.38	2180.95	1628.81	1644.86	2169.84	1837.31	1328.11	1405.02	1410.98	2432	1869.8	1543.82	1350.45	778.938	1445.85	1533.9	1083.23	1611.89	2287.31	2306.96	1670.78	1437.51	1265.83	2316.26	2114.47	2083.43	1994.11	2732.13
A0A0D9QZM0	A0A0D9QZM0	A0A0D9QZM0_CHLSB			13424.4	7660.34	13242	13308.8	11800.6	11790.9	16666.1	7647.07	15697.1	16165	13239.1	11930.3	14289.4	10446.6	13341.2	17190.5	10191.4	15789.5	12377.4	9466.89	17177.8	16206.7	11888.9	13549.2	17785.7	17761.7	18631.2	14196.8	13272.8	14978.7	15574.4	9219.61	17434.1	14536.6	9981.55	14264.6	14289.9	10298.8	15340.6	16658.3	13417.5	15202.7	19053.2	13840.7	17634.2
A0A0D9QZM1	A0A0D9QZM1	A0A0D9QZM1_CHLSB	SAMM50		15106.1	18369.6	16771.2	14278.4	17025.5	17035.8	18726.7	13296.3	11027.7	10887.9	18164	14073.4	16861	23828.1	20792	13276.2	18682.3	18983.6	13650	15968.9	11260.8	13268.4	12567	11692.4	15434.1	16853.7	10476.4	12794.9	17246.1	11442	14815.3	19058.2	22751.5	15580.1	16010.8	10603.6	22611.6	31383.8	13290.5	18724.9	11160.2	10176.7	9802.54	15803.6	17861.6
A0A0D9QZM2	A0A0D9QZM2	A0A0D9QZM2_CHLSB	MAP1S		12679.5	12313.1	12268.7	11428.8	12312.4	12268.4	12983.6	11109.6	14903.1	12419.3	11367.8	12665.4	14358.1	13967.2	14634.6	11443.2	12295.3	13086.5	10924.7	12336.9	12820.6	13063.1	13692.9	14250	13224.4	12496.3	13592.1	13796.4	13959.2	14440.7	12480.3	10600.1	13811.4	11474.9	12175.1	12925.2	13158.5	13430.7	13719.3	13568.5	13269.9	13613.4	14121.4	15166.9	15139.8
A0A0D9QZM3	A0A0D9QZM3	A0A0D9QZM3_CHLSB	PFDN5		38953.7	46285	47006.4	48284.5	44944	41499.5	39996.9	40031.7	41541.8	41682.9	44857.9	39033.4	40115.1	39464.3	39260.9	51156.4	46103.4	40635.7	44046.6	38886	45851.5	43527.8	35971.5	43165.3	34237.8	39824.5	40676.1	36435	35641.7	41588.4	42082	39212.6	43178.9	48399.3	42165.3	47239.5	42476.3	33995.4	34551.8	36316.6	35875.7	35097.9	38374.5	35854	35713.1
A0A0D9QZM4	A0A0D9QZM4	A0A0D9QZM4_CHLSB	MYG1		54015.4	48445.9	46503.7	54974.3	49846.3	50040.9	55873.5	49907.4	47969	54744.3	66170.7	59206.9	53458.1	48932.1	51160.4	53866.6	43720.2	49847.8	58156.6	49163.4	53946.1	62189	59610.8	56966.2	55807.1	68378.7	57154.4	61431.6	55700.6	55383.4	57362.4	57105.9	49924.5	59273.7	57940.3	50651.2	56449.9	60803	43386.8	61607.6	33590	46117.2	54115.7	60396.3	52063.5
A0A0D9QZM8	A0A0D9QZM8	A0A0D9QZM8_CHLSB	OGA		19991.2	15670.4	20225.1	17660.9	19214.3	19180.5	21078.4	16008.2	17986.7	17543.1	17923.5	15062.1	20587.9	16289.2	18478.4	17759.2	15792.3	20440	18101.5	19558.8	20391	19685.2	15940.9	16802.8	20494.1	15646.7	16349.3	17865.9	16944.1	18769	19489.4	16120.1	18389	17487.9	17301	16690.2	18888	13714.6	19631.5	15918.4	17307.1	16924.3	18505.6	16930.2	16862.2
A0A0D9QZM9	A0A0D9QZM9	A0A0D9QZM9_CHLSB	SPAG9		35803.2	38213.2	36331.2	36441.5	38962.3	36609.2	37457.8	38802.2	38242	33729.6	38351.1	37909.4	37765.7	35526.8	36927.5	36887.4	38246.5	37491.8	38554.4	35801	35781.5	39622.3	39505.3	38099.3	35765.2	36869.8	37852.9	37171.1	36329.7	34597	35545.8	37392.2	36006.1	35992	33927.9	33237.1	38526	36537.1	36621.4	35211.2	31190.6	35221.7	33580	36235.3	37691.5
A0A0D9QZM9;A0A0D9RGE1	A0A0D9QZM9;A0A0D9RGE1	A0A0D9QZM9_CHLSB;A0A0D9RGE1_CHLSB	MAPK8IP3;SPAG9		7379.31						11765.1		11798.7	12833.2				7319.64	6069.2	9686.18		10898.1	7946.76		9687.45	8569.41				12010.5	13691.1				13147.8		12674.2	11519.4		17845.9			14989.9	12546.3	15619.5	15877.2	16141.8		11007.5
A0A0D9QZN0	A0A0D9QZN0	A0A0D9QZN0_CHLSB	NPM3		372956	321279	388584	306067	305401	327803	309128	296631	325636	288547	354290	291732	306580	294877	298094	321040	356403	356417	290856	284033	336877	322610	331096	321925	328929	352684	356973	312222	274669	265604	359057	290687	320034	308108	266536	284760	299307	289344	291005	288567	264730	301180	363106	265139	267876
A0A0D9QZN2	A0A0D9QZN2	A0A0D9QZN2_CHLSB	NME1		137447	150098	139636	151291	141510	151308	137657	131351	142159	167123	162689	157747	141161	133728	147191	166491	144222	156013	158336	125335	168276	148248	163103	143841	155538	205653	197868	162035	142570	133439	145732	127251	147139	153445	154500	149876	140872	132961	162032	150627	145134	131633	226575	167369	134323
A0A0D9QZN2;A0A0D9QZN3	A0A0D9QZN2;A0A0D9QZN3	A0A0D9QZN2_CHLSB;A0A0D9QZN3_CHLSB	NME1;NME2		359637	317048	355931	422658	383792	382058	359730	374332	383449	418683	514900	451015	401425	483849	403709	475051	341847	457885	400978	352306	404472	445145	476736	504644	432048	515644	423816	535067	506900	488693	442131	379931	360322	432562	494150	420703	435580	403382	408701	485246	365862	612338	519387	511369	464599
A0A0D9QZN3	A0A0D9QZN3	A0A0D9QZN3_CHLSB	NME2		370823	357540	378792	440988	424796	432292	498170	395899	461648	514705	442665	442829	492830	405016	466293	453563	350950	394463	427047	379927	463440	452205	469296	504509	489552	475029	449289	485809	479171	454708	412485	360344	377760	468962	396969	455819	460176	441801	433402	477338	358602	341353	576473	467411	485160
A0A0D9QZN4	A0A0D9QZN4	A0A0D9QZN4_CHLSB	PHKB		4689.39		4643.78		5171.05	4861.19	5895.39	2651.22	4856.3	5435.79			5573.93	5443.5	3325.68	6605.31	6038.44	5723.28	5455.39	5954.87	5791.35	3925.46	5151.15	5760.69	5632.93	4078.67		3092.49	4979.05	4010.75		4569.47	5207.99	2281.75		3825.46	3009.11		3879.77	6028.28	2542.71	4672.2	6099.23	4368.7	5005.17
A0A0D9QZN6	A0A0D9QZN6	A0A0D9QZN6_CHLSB	DPCD		19544	17173.6	21621.4	19960.2	19702.3	20596.5	12867.6	14909.4	14608.8	14477.5	15339.8	13928.4	15462.1	13364.2	13691	19581.5	22756.8	17307.4	22382.6	18771.9	17178	17686.5	16862.8	15397.7	14962.2	17021.9	10793.6	17061.8	17237.7	15226.1	19135.8	23616.7	16394	21448.2	19159.6	11325.4	16695.8	19621.3	12532.1	16013.4	6765.84	9771.58	14190.7	17818.9	13676.6
A0A0D9QZP0	A0A0D9QZP0	A0A0D9QZP0_CHLSB	ESPL1		5751.64	4527.67	5778.68	4840.83	6258.11	6473.13	4462.6	3612.42	4142.08	3029.61	3518.22	3171.53	2981.79	2786.11	3072.11	6081.18	5523.38	5208.57	4677.84	6035.14	4998.57	4722.5	4345.34	4522.41	3603.27	3112.97	2227.07	2900.65	3338.05	2689.55	4435.45	4447.68	5399.07	4264.88	5361.4	3681.45	4883.4	3849.15	3601.04	3235.73		1991.82	2944.06	3349.33	4037.49
A0A0D9QZP3	A0A0D9QZP3	A0A0D9QZP3_CHLSB	UTP18		16294	13183.8	15577.4	14824.4	16156.2	14227.8	16828.2	13285.1	16459.2	18039.3	13140.7	13750.8	16877.3	14816.9	18166.4	14670	15479.9	16348.8	15098.9	11453.8	18017.7	15897	15196.2	16071.9	17188	14129.7	14620.2	16812.3	16397.2	16575.6	16960.3	14052.7	15618.6	15481.7	14936.4	14310.7	16206.2	12721.4	18189.8	16183.3	13003.7	13895.6	14414.1	15822.5	17702.8
A0A0D9QZP6	A0A0D9QZP6	A0A0D9QZP6_CHLSB	TTC17		5851.57	4248.56		4109.57	5410.11	6425.55		5521.51		3613.66		4378.56	5154.48	4837.34	5556.49	5123.29		6653.05	6624.04	4033.97	5042.53	5468.08	5398.71	4581.6	5163.5				4824.87		5135.72	6892.78	6846.97	6665.18		3570.26	6168.97	6875.05	3597.95	4136.09			3706.87	4023.08	4425.3
A0A0D9QZQ3	A0A0D9QZQ3	A0A0D9QZQ3_CHLSB	TOM1L1		36521.1	31773.5	31998.5	37608.7	39759.3	37335.5	40887.2	31325.5	36072.6	35463.4	25513.8	28813.7	38258.3	28646.1	29513	25076.6	30610	31666.3	30577.7	31078.5	37370.9	36260.3	39139.4	38184.5	37481.9	29229.6	35247.8	43454	31752.8	37479.8	34474.1	26586.3	29299.6	35909.4	31460.3	31598.8	36507.2	40138.2	41224.4	36434.8	48773	34676.4	23627.8	29955.5	35142.4
A0A0D9QZQ5	A0A0D9QZQ5	A0A0D9QZQ5_CHLSB	HSD17B12		14387.5	21631	20511.9	15031.7	18439.2	16810.9	24072.5	15930.9	13553.7	15320	12229	13885.9	19156.5	27934.2	26080.4	17695.7	29142.2	26318.1	16319.1	20304.8	15639.5	15753.8	12120.1	14027.8	19081.9	14666.4	14074	12029.2	14517.2	12476.4	16186.5	24357.7	29534.2	16807.8	15121.3	13527.2	22122.9	29122.2	15520.7	19156.2	11497.8	12749.9	8422.63	15465.4	18721.7
A0A0D9QZQ8	A0A0D9QZQ8	A0A0D9QZQ8_CHLSB	STXBP4		5247.89	3529.88	4991.46	3560.58	4495.38	5055.12	4685.01	3947.39	4426.51	4283.73	4072.52	4184.3	5684.06	4079.01	4755.96	5140.9	5439.74	4203.28	4507.87	2832.59	4493.4	4664.66	4409.87	5439.84	4827.5	4869.11	4896.07	4739.5	4630.9	7061.98	4848.22	4444.08	5529.75	3235.14	4438.96	4697.91	3143.57	4623.19	4975.61	3633.45		5290.56	4891.19	4166.83	3978.5
A0A0D9QZR0	A0A0D9QZR0	A0A0D9QZR0_CHLSB	ALKBH3			2793.63		4075.96		3524.58	3821.78									3371.05		4363.19	3439.15	2634.91	4005.06	4820.09	3507.48	3319.95		3040.52	3366.32	3573.07		4046.23		3087.28	4854.96	3211.03	2785.94	5105.87	3263.44		5395.27				3489.96	2542.7
A0A0D9QZR4	A0A0D9QZR4	A0A0D9QZR4_CHLSB	SFXN3		16822.8	12108.9	14474.9	10763.9	12277	13878.5	19302.8	8809.12	16163.6	16670.8	11794.4	10844.6	17876.2	17306.7	21261.3	13563	17777.3	25370.6	15039.4	10062	14437.2	15888.9	10545.1	13999.6	19069.4	12889.3	16327.7	13463.7	13241.9	13958.5	15605	16232.5	27597.8	16654.7	11848.6	18322.3	18675.8	16122.8	17230.9	16539.2	15447.3	18726.2	14338.6	13387.2	21263.1
A0A0D9QZR4;A0A0D9RAT9	A0A0D9QZR4;A0A0D9RAT9	A0A0D9QZR4_CHLSB;A0A0D9RAT9_CHLSB	SFXN1;SFXN3		14748.2	12625.8	16295.5	15622.9	16010.5	17980.4	15544.7	10752.9	15588.9	15874.5	14467.3	9959.52	16679.3	22916	19184.2	18143.5	21217.9	22217.3	14593	19346.3	15169.9	16001.4	12836.3	14563.5	18664.2	18202.6	14125.7	11992	18766.3	14847.1	10965.2	17657.2	20102.5	16500.9	17585.5	15007.2	19719.5	25928.1	13416.4	18333.3	20959.7	16077.8	16649.9	20494.7	18535.9
A0A0D9QZR7	A0A0D9QZR7	A0A0D9QZR7_CHLSB			15391.2	8116.12	11577.2	9914.67	10324.5	11149.4	12626	10170.2	15472.1	12842.1	8984.86	10566.6	13275	12124.1	11927.1	11248.5	7659.39	12269.4	8522.62	7496.17	14436.5	10908.6	11462.4	12708.4	11983.7	10159.4	12396.3	10820.5	11559.4	15409.7	9845.42	8447.75	13733.2	10029.1	8546.11	25051.2	12129.9	10104.6	19373.1	9814.95	15568.3	15895.2	11793.7	9453.56	12286.9
A0A0D9QZR7;A0A0D9SC95	A0A0D9QZR7;A0A0D9SC95	A0A0D9QZR7_CHLSB;A0A0D9SC95_CHLSB			23968.1	18349.7	21742.8	23116.3	25561.9	27530.1	25762	24332.1	27600.2	27356.1	26662.6	28905.9	26689.9	24272.9	26540.3	20696.6	16889.5	21735.7	25448.1	24661.8	27184.5	26876	27692.3	26559.7	26240.5	33806.3	28998.1	25218.8	28316.2	31352.5	19932.3	18888.2	23433	24464.8	25193.5	25342.9	25196.9	26773.4	26955.1	27049.8	15295.1	23003.4	30937.9	29553.6	29108.7
A0A0D9QZR8	A0A0D9QZR8	A0A0D9QZR8_CHLSB	LZTS2		1177.84	2098.42	1417.28	2525.54	1928.13	1873.2	1357.08	1522.28	1386.36	1100.33		1302.3	1237.95			1762.72	1767.07	2142.32	1568.44	1881.92	1639.72	1903.34	1519.01	1290.02	1232.49	827.406	2334.07		1469.19	1203.82		1782.08	1921.03	1041.96	2076.63	1099.99	1326.61	1469.25	1697.31		4221.77	1579.7	1358.55	1184.81	1467.63
A0A0D9QZR9	A0A0D9QZR9	A0A0D9QZR9_CHLSB	TWNK		2772.09	1769.89	2208.19	1700.26	2178.35	2502.66	2667.49	1090.74	1975.98	1396.6					1933.84	1885.12		2148.61	1912.75	1966.87	2435.29	2151.46	1656.14		1380.96		1600.82	1850.54	1215.51		1983.51	1359.09	1916.84	1963.68	1572.49	2223.38	2111.53	1232.28	1933.16	1923.83		2261.25			1946.05
A0A0D9QZS1	A0A0D9QZS1	A0A0D9QZS1_CHLSB	GPT2		4108.03	3512.03	4611.66	2994.82	3388.35	3791.89	3119.37	2565.17	2011.27		1764.92	2300.97	1992.09	2356.38	2008.37	3518.35	2245.44	4618.94	3411.52	3055.84	4504.52	3672.65	2372.04	2877.73	2521.57	2240.81	1811.98		1685.24	1830.04	3054.84	3773.84	3801.49	3235.77	3200.42		2996.88	1819.58	1954.45	2804.64		1115.67
A0A0D9QZS3	A0A0D9QZS3	A0A0D9QZS3_CHLSB	EXT2		4736	7041.73	5697.31		6604.22	5349.41	6156.14	3771.71	3960.31	2155.61		3152.45	3619.36	4008.95	3465.2	5793.71	9683.56	8052.82	5513.12	5699.05	5277.57	4647.64	4901.04	5287.62	4346.08		2696.27		3244.24	4017.95	4096.91	8010.49	8556.35	3073.03	4738.41	3771.68	5031.77	6571.31	4440.66	4323.89		4939.12		3001.53	4053.64
A0A0D9QZS8	A0A0D9QZS8	A0A0D9QZS8_CHLSB	MRPL43		23390.9	23570.2	21009.9	24817.7	24083.8	20344	19034.1	22207.4	19153.8	11854.8	20645.3	17748.2	22108.7	20995.6	18451	25067.9	16622.8	20554.6	20614.7	30247.2	26815.3	19872	20028.5	17184	20739.8	21658.5	15436.5	16295.2	20634.9	22580.4	21705.3	29631.7	19361.8	19917.6	17995.1	22593.7	23917.7	13658.5	18514.6	17903.5	19165.1	24712.6	18946	17796	22375.5
A0A0D9QZS9	A0A0D9QZS9	A0A0D9QZS9_CHLSB	ORC6		5860.71	7538.41			6045.98			6525.57	4678.17	4313.14	5491.99		4265.74			6425.38	7072.29	5664.44	5612.35	8184.52	6426.76	6453.2	6000.43	4367.25	3812.48	4352.08		4055.38	4805.84		3838.7	7133.49	5391.02	5688.03		6890.71	5309.94	6418.96	7796.36	5742.27	8694.77	8121.25	4569.71		5009.16
A0A0D9QZT3;A0A0D9RTC1;A0A0D9R9F0	A0A0D9QZT3;A0A0D9RTC1;A0A0D9R9F0	A0A0D9QZT3_CHLSB;A0A0D9R9F0_CHLSB;A0A0D9RTC1_CHLSB	TNS1;TNS2;TNS3		11979.6	6205.19	6416.36	7639.68	7597.53	8503.35	10316.5	6440.41	11124.7	12028.5	7099.32	6122	6362.89	7400.14	9919.41	9223.42	8303.49	9663.94	8748.36	6171.55	9393.13	11595.4	9208.34	8186.84	11000.7	6482.99	14129.1	7991.73	6827.03	9679.43	6866.64	6610.02	9883.04	9112.2	8263.61	10042.8	7976.97	7794.31	14495.7	11074.1		20150.5	9921.44	7330.82	9545
A0A0D9QZT4	A0A0D9QZT4	A0A0D9QZT4_CHLSB	COLGALT1		22950.8	19041	23339.5	20871.8	19315.7	21106.9	21140.8	22235.7	21592.1	26796.1	20890.6	19218.4	22069.3	18895.8	22311.8	23951.5	19394.5	23603.9	20982.5	19138.7	22015.6	21579.8	19727.2	22002	22951.8	21186.6	22943.9	23544.3	20885.7	23271.3	23623.1	17239.9	24555.7	24202	21007.3	22884.7	22258.7	19097.3	21080.1	24218.1	24273.6	23832.4	27114.2	20407.3	22506.2
A0A0D9QZT5	A0A0D9QZT5	A0A0D9QZT5_CHLSB	PGLS		48843.2	22466.2	27863.4	32381.2	24446.6	31221.3	34388.4	19518.5	49983.3	53742	21095.1	18933.6	27344.2	21587.7	32485.1	30566.6	20030.9	33750.9	27995.7	19676.3	37977.4	27274.5	24071.4	30280.5	43338.6	34996.5	70850.4	31022.1	28655.8	33833.6	32058.4	22367.1	39282	34345.3	20147.6	57028.7	31762	22636.2	57306.9	40175.2	69599.7	71715	47099.9	24107.6	46836.5
A0A0D9QZT6	A0A0D9QZT6	A0A0D9QZT6_CHLSB			91164.8	84176.3	101338	84816.1	75233.8	81085.6	96994.7	103510	109053	113029	93490.2	110034	87588.1	100449	93264	76054.4	75683.8	81227.8	63734.2	88682	92038.6	69487.3	93216.3	96337.1	118726	102292	146604	100358	88516.7	120467	97532.1	81638.5	102829	81362.9	72858.1	145026	88608.1	93237.8	124513	109146	130921	95735.4	119187	93588.5	130353
A0A0D9QZT6;A0A0D9R6B5	A0A0D9QZT6;A0A0D9R6B5	A0A0D9QZT6_CHLSB;A0A0D9R6B5_CHLSB			11581.5	8467.73	12481.5	11701.9	11160.6	9876.43	7503.03	7841.99	9314.27	6568.9	12949.6	12826.6	7734.72	12313.6	12345.3	11657.7	11241.9	10900.9	13432	10302.3	9694.91	9971.1	10426.7	8936.24	6969.29	14142.3	7912.53	9050.34	11839.8	10213.9	8119.92	9327.95	8400.08	9873.2	8903.16	7230.27	8386.14	7349.1	4072.45	7227.33			12104.8	12239	13280.9
A0A0D9QZT6;A0A0D9R6B5;A0A0D9RP71	A0A0D9QZT6;A0A0D9R6B5;A0A0D9RP71	A0A0D9QZT6_CHLSB;A0A0D9R6B5_CHLSB;A0A0D9RP71_CHLSB			806.695	3127.08		1427.14			1212.11	3195.39			1217.26	3388.18	1505.44	2396.06				2012.33	1418.92	2994.65		1323.05			1397.9	2096.71	2202.27			1702.06				1463.35	1243.68		1224.71	3065.91						1331.88
A0A0D9QZT6;A0A0D9RP71	A0A0D9QZT6;A0A0D9RP71	A0A0D9QZT6_CHLSB;A0A0D9RP71_CHLSB			1649.97	1318.37	1365.06	1606.2	1425.87	1378.54	1980.17	2409.82	1053.93		2080.92	2937.83	3573.81	2519.62	2925.78	764.518	1067.19	1337.78	1405.14	1411.31	2070.9	2160.22	1854.79	1751.99	2008.69	1297.95	1948.05	3025.48	2691.06	2136.61	1366.19	895.396	1661.54	1915.22	1453.07	2070.2	3046.91	2510.25	2637.34	1899.26		993.707	2697.97	2063.26	2395.61
A0A0D9QZT8	A0A0D9QZT8	A0A0D9QZT8_CHLSB	SLC27A1		4230.87	4515.79	3408.91	3580.02	3699.76	3386.21	5467.53	4929.46	4221.01	4650.55		2928.89	4519.41	4625.48	5288.13	4040.94	5641.97	4898.94		3223.98	4234.82	4593.48	2739.73	3375.44	5909.56	2760.05	3666.72	3539.71	4182	4046.13	3164.94	4383.79	6114.62	4671.36	3141.42	3070.74	5097.21	5460.8	4089.13	4331.79		2970.57	3522.82	3176.67	4320.37
A0A0D9QZU0	A0A0D9QZU0	A0A0D9QZU0_CHLSB	HIF1AN		24366.4	11814.9	18946.2	18398.2	18937.7	22007.2	23316.4	11410.7	23263.9	24603.6	17612.5	18292.7	21741.2	20370.2	19470.6	23093.2	18257.5	21958.2	22643.8	16143.3	23356.4	24447.3	23391.4	22712.8	24664.9	17952.9	18976.1	24476.2	20880.1	21810.5	21719.4	17664.1	24117.1	24403.8	21911.1	22420.7	22214.8	18643.4	22913.5	24071.9	24473.4	23852.8	21796	20057.9	22599.1
A0A0D9QZU2	A0A0D9QZU2	A0A0D9QZU2_CHLSB	VPS35		45713.2	49806.2	51018.5	50347.9	51937.3	51619.1	47936.2	54609.3	47824.5	47526.8	54327	57370.1	48916.9	53251.6	50011.4	41613.7	48614.3	41450.8	44001.1	47537.2	46072	51190.1	58007.7	52062.2	49723.8	50388	45124.2	52135.9	55238.8	53347.7	46497	45678.1	44440.3	52740.8	50192.3	38890.8	50726.1	54449.6	44563.3	53100.6	37557.2	40650.3	29099.3	57074.4	46365.7
A0A0D9QZU4	A0A0D9QZU4	A0A0D9QZU4_CHLSB	NDUFB8		5404.47	5296.53	7788.7	5315.59	4833.71	5738.95	8412.51	2484.37	3680.83	4782.54	3838.06	3744.05	6019.1	6921.81	7504.61	8002.21	10418.8	11131.3	7572.99	6490.22	4379.85	5303.97	4204.98	4665.8	6146.74	5293.2	4972.11	3385.35	3324.7	4469.15	7164.06	9449.28	12275.7	6031.88	5700.59	4156.34	8055.15	6244.1	4241.93	5189.16	4063.79	4590	5042.69	3968.25	5387.95
A0A0D9QZU6	A0A0D9QZU6	A0A0D9QZU6_CHLSB	SHCBP1		4945.83	5378.7	4593.33	4392.88	4094.07	4573.65	3451.19	2447.67	2837.83	4357.38	3460.98	4097.59	3254.69	3452.47	2864.41	3573.9	3247.98	4011.98	4578.78	4985.3	4582.12	3290.61	4007.32	3406	3439.03	3897.49	3282.36	1178.94	3458.94	3492.68	5163.39	5566.13	5319.99	3499.42	4228.86	4740.09	3486.99	3405.35	3511.77	2741.73		3998.11	3163.67	3821.95	3546.17
A0A0D9QZV2;A0A0D9S2J2;A0A0D9SAU5;A0A0D9SC49	A0A0D9QZV2;A0A0D9S2J2;A0A0D9SAU5;A0A0D9SC49	A0A0D9QZV2_CHLSB;A0A0D9S2J2_CHLSB;A0A0D9SAU5_CHLSB;A0A0D9SC49_CHLSB	KRT35		57878.1	3849.9	34662.3	33785.1	46488.4	53664.5	71148.1	6266.06	91253.4	98572.5	28929.5	18070.2	56116.6	30112.6	63538.5	41332.4	11581	64670.8	25766.1	4483.09	67822.4	62120.6	56157.1	72440.9	71870.1	49787.4	74376.9	61293.7	48630.9	73552.2	64574.6		76072.2	61188	23874.6	70735.3	59738.7	21608.3	89879.3	69300.3	87963	86733.5	52826.1	25040.1	64507.3
A0A0D9QZV2;A0A0D9SAU5	A0A0D9QZV2;A0A0D9SAU5	A0A0D9QZV2_CHLSB;A0A0D9SAU5_CHLSB			33894	41992.9	21959	15896.3	18908.7	23961.5	63595.1	31191.7	49448.8	57255.7	18386.5	28375.7	18441.4	16905.5	29036.1	46779.3	24620.2	58743.2	31819.5	87275.5	53044.6	30192.7	22290	28079	42000.3	68909	142902	15542.5	26589.8	26671.6	41697.9	68414.7	56057.7	40823.8	23181.4	90545.2	25831.1	15615.4	181991	38134.2	58720.4	81302.9	100916	38417.6	46166.9
A0A0D9QZV2;A0A0D9SAU5;A0A0D9SC49	A0A0D9QZV2;A0A0D9SAU5;A0A0D9SC49	A0A0D9QZV2_CHLSB;A0A0D9SAU5_CHLSB;A0A0D9SC49_CHLSB			61683.2	43455.8	78899.4	66536	65857.4	71874.8	72534.5	43132.6	70680.7	83164.3	54951.2	67318.2	57298.8	50277.7	71026.6	77522.6	57019.7	62589.6	69293.7	49982.1	67390.3	69283.6	51488.5	57051.1	60871.6	70980.4	95492.4	68665.5	62276.7	57454.7	67154.1	41190.8	72018.1	71010.2	44137.5	74155.5	63235.5	45636.2	71609.7	76162.9	82909	88816.7	93978.6	60074.3	66339
A0A0D9QZV2;A0A0D9SAU5;A0A0D9SC49;A0A0D9SCP7	A0A0D9QZV2;A0A0D9SAU5;A0A0D9SC49;A0A0D9SCP7	A0A0D9QZV2_CHLSB;A0A0D9SAU5_CHLSB;A0A0D9SC49_CHLSB;A0A0D9SCP7_CHLSB			80111	59147	48585.6	44677.4	55455.5	54508.4	81262	55644.1	80698.7	75933.1	60629.9	67409.8	53882.9	46977.6	68102.2	58187.1	47591.1	62494.5	39365.9	39280.4	62847.2	71056.8	70272.9	72106.5	70719.4	84816.8	101469	55532.2	55825.7	60104.5	87326	58493.2	92035.2	100228	59313.8	109320	93071.8	55602.5	86337	115999	172140	148892	91490.8	76683.1	82022.6
A0A0D9QZV2;A0A0D9SC49	A0A0D9QZV2;A0A0D9SC49	A0A0D9QZV2_CHLSB;A0A0D9SC49_CHLSB			14703.6	11837.3	11114.9	12644.9	13989.5	13039.1	14276	16432.6	12860.1	12471.7	16528.3	12779	11013.4	12219.8	12278.4	11166.3	11133.8	13784.7	8614.91	8795.52	9429.31	12483.2	15874.4	12523.2	13098.7	11967.4	15236.9	10879.6	10655.5	10929.9	18915.9	8892.22	15529.5	12260.5	14904.6	17818.8	16663.6	15480.3	15364.2	17660.4	22854.8	20798.9	13688.8	17807	15193.3
A0A0D9QZV2;A0A0D9SC49;A0A0D9SCP7	A0A0D9QZV2;A0A0D9SC49;A0A0D9SCP7	A0A0D9QZV2_CHLSB;A0A0D9SC49_CHLSB;A0A0D9SCP7_CHLSB
A0A0D9QZV8	A0A0D9QZV8	A0A0D9QZV8_CHLSB	DGKE		3122.9		3669.38		3416.04	3905.79	5087.99		3464.88	2941.48			4295.06	4160.47	4564.76		5003.66	5619.62				2942.78			4115.73		3429.09		4410.63	3002.45			7079.24				5078.72	4210.54	4618.68	3580.49			3866.61		4954.99
A0A0D9QZV9	A0A0D9QZV9	A0A0D9QZV9_CHLSB	TP53I11																										1263.73														658.025					1823.67
A0A0D9QZW0	A0A0D9QZW0	A0A0D9QZW0_CHLSB	TRIM25		40951.5	39267	42155.3	40499.4	43799.5	41975.3	43801.6	43770.3	41665.4	40993.6	41824.2	39231.4	44333	44915.4	43605.9	40900.5	42363.2	43351.5	39861.7	41254.5	40926.9	42629.2	41560.5	43382.2	38080.5	39672.5	37430.2	40348	39760.8	40573.2	41917.4	41458.2	40505	41314.7	41394.9	35529.7	43254.5	41529.6	39757.4	43307.6	33843.9	37876.4	36603.5	45002.1	45454.3
A0A0D9QZW2;A0A0D9R058;A0A0D9R070;A0A0D9R0A1	A0A0D9QZW2;A0A0D9R058;A0A0D9R070;A0A0D9R0A1	A0A0D9QZW2_CHLSB;A0A0D9R058_CHLSB;A0A0D9R070_CHLSB;A0A0D9R0A1_CHLSB	KRT75;KRT79			1585.48			5661.54	5269.16	10002.9		6030.07	10040.7			6366.49	2212.37		4519.88	3520.07	8671.7	3444.02		4508.43		4250.66	5603.67	7683.73	6549.54	8534.61	5193.94	5588.94			1185.83	6180.34		2778.13							18511.2	10406.6		8348.56
A0A0D9QZX0	A0A0D9QZX0	A0A0D9QZX0_CHLSB	MVB12A		11349.7	9319.36	7934.29	9114.36	8607.35	9114.07	9312.26	9634.7	9576.37	10608.5	10010.2	9361.44	8823.51	9851.72	6574.09	10316.5	8158.37	9481.93	8279.31	10621.3	10299.4	8887.69	7725.57	8800.22	9207.05	7404.29	10129.6	8792.95	8519.92	8198.75	8715.05	9094.16	10888.4	8964.08	8975.29	10038.4	8371.89	9566.33	9178.91	8484.74	9843.11	8883.94	11570.9	9998.64	9076.92
A0A0D9QZX2	A0A0D9QZX2	A0A0D9QZX2_CHLSB	COIL		28953.7	14552	26810.7	26196.2	26953.8	28817	29302	15424.2	32584.5	24906.4	25735.1	25379.4	30572	29768.4	28346.4	23425	23050.1	25151.8	24856.1	18249.6	28638.9	29058.9	28964.9	32903.4	28264.5	24720.6	24927.6	30006.2	29497.5	35309.1	17452	17872.3	27614.2	25238.1	20189.6	24224.1	30171.1	23765.5	25384.5	26640.8	19417.9	23996.5	22790.5	24506	29653.7
A0A0D9QZY1	A0A0D9QZY1	A0A0D9QZY1_CHLSB	TTLL12		52948.9	48336.6	51498.6	53859.4	49809.3	54242.7	55434.4	50394.9	51441.3	54282.8	53375.9	52219.6	59603.8	52645	56032.4	49395.5	51657.3	51133.9	51108.4	48116	54356.9	54998.8	51695.6	51591.5	54404.4	48168.6	50802.6	58901	56548.2	58184.7	56511.2	49052.4	51130.7	52909.8	54395.3	53825.1	54260.5	53025.2	52758.3	55374.7	43713.5	53060.5	44730.3	54291.3	53725
A0A0D9QZY2	A0A0D9QZY2	A0A0D9QZY2_CHLSB	RUSF1		4759.48	4694.31	5946.36	4155.2	5715.55	4844.66	4539.21	3983.33	4054.27	4489.1	3803.76	4251.9	5894.2	7743.78	6047.22	3976.13	6026.41	5241.49	4119.49	4240.82	3577.16	3694.5	4636.35	4242.74	5387.07	4164.44	6628.65	2988.71	4833.22	4634.59		4133.17	6380.93	4200.04	3973.06	5269.65	6811.61	6725.16	4796.83	5039.91	4609.08	7555.49	4196.31	4449.36	5639.25
A0A0D9QZY6	A0A0D9QZY6	A0A0D9QZY6_CHLSB	MCAT		21018.3	26460.8	26181.8	22200.4	26540.1	24767.5	22548.7	22107.2	20751.1	18756.2	24665.8	24529.4	23511.4	24840.8	22991	23319.7	24425.3	22790.4	24809.4	25709.8	24564.5	22523.8	20918.9	23184.6	22219.7	23845.5	19632.3	23049	27197	24527.7	23218.3	26239.2	23703.1	20869	26744.9	21192.4	21700.5	24878.3	21571.2	20717.8	21983	19769.2	23732.8	28184.4	25621.5
A0A0D9QZZ4	A0A0D9QZZ4	A0A0D9QZZ4_CHLSB	DDA1			2287.02		3423.72	4989.02		2417.37	3059.08	3211.13	1627.54		2762.1		3147.48		4305.05	2891.88	3816.74	3323.23	2017.01			3588.08	3160.89	3445.59	2829.05	1541.51	2978.16	2741.1			3174.19	3044.99	3711.57		2651.39		3148.75		3529.75			2402.65
A0A0D9QZZ5	A0A0D9QZZ5	A0A0D9QZZ5_CHLSB	PACSIN2		31889.1	22104.4	24692.5	25970.2	25752.8	25949.1	26521	21585.3	27123.7	26632.2	27235.8	23094.3	29231.1	24296.7	27301.6	25195.9	22744.3	27092.3	22662.1	25454.1	26873.1	22130.2	25450.9	27964.3	26956.5	29024.2	30103.8	26054.4	25441.2	25719	22798.4	21198.9	25941.2	23604.7	25625	25211.7	24357.6	25124.2	28744.5	25908.6	24875.7	22358	28876.5	22916.6	28051.2
A0A0D9QZZ9	A0A0D9QZZ9	A0A0D9QZZ9_CHLSB	MRPL34				3976.43	3716.69	6059.84	5648.47	8406.77		9235.76	7964.99		3327.75	4008.59	4217.72	5929.44	6892.61	3700.34	7406.67	4987.24	2080.66	8183.5	7484.58	5194.3	7011.44	8689.19	6820.46	9469.89		5127.62		6288.77	3116.88	7908.23	9006.88	5190.98	10973.6	8021.3	4563.76	8730.92	7764.49	23976.2	10016	9624.08	4699.28	7511.99
A0A0D9R000	A0A0D9R000	A0A0D9R000_CHLSB	AKAP1		10248.6	12991	13610.6	10030.4	13587.3	11874.3	14278.2	6909.87	11354.2	11131.9	9551.21	10336.9	12523.6	16586.8	16477.7	10159.5	21593	16462.6	11893.9	12563.2	11512.3	12992.6	9640.68	12000.7	12217.4	8360.02	9530.27	8363.77	12510.9	11608.1	10256.9	13923.9	16683.5	9282.22	11848.2	7579.53	15587.1	16532.8	10068	10316.3	6686.46	6933.98	7979.25	9602.5	12925
A0A0D9R002	A0A0D9R002	A0A0D9R002_CHLSB	MSI2		19177.4	14237.7	16109.9	19560.9	17668.2	17265.6	17427.6	15870.5	18513.7	18904.3	17703.8	18672.7	20413.2	17138.7	19303.5	16595.7	15842.4	17987.4	17515.6	14021.8	16969.1	19142.3	17754.3	19132.7	19716	15654	17758.7	19704.3	18317.7	20366.8	17105.5	12699.7	17677.3	18060.2	14803.2	14350.1	19946	16775.1	17638.9	19213.8	14431.7	16555.5	17357.7	19644	19382.1
A0A0D9R002;A0A0D9S4I2	A0A0D9R002;A0A0D9S4I2	A0A0D9R002_CHLSB;A0A0D9S4I2_CHLSB	MSI1;MSI2		6473.02	8085.44	7974.14	7484.08	10204	8562.1	7419.7	9425.77	7883.16	9230.03	9181.07	11345.2	9700.56	9786.79	6321.65	8338.87	10086.9	7097.92	7865.82	8508.87	7207.32	7425.58	9184.51	9266.17	8334.97	8902.44	5046.9	9193.33	8906.52	8244.79	6579.29	8201.4	6928.93	7596.07	8270.34	7601.09	7258.35	9304.85	6222.97	6354.78	5344.61	6747.92	5967.45	9041.61	8699.21
A0A0D9R005	A0A0D9R005	A0A0D9R005_CHLSB	VEZF1							1314.88					486.226	851.419	1098.2	1249.96				1537.47	1114.28	846.11			1099.25	873.703	739.918				666.886			846.902	1555.54					1061.88						1628.87	1322.07
A0A0D9R007	A0A0D9R007	A0A0D9R007_CHLSB	MRPS23		51658.8	45632.7	53748	47969	58816.4	60057.1	45883.2	43392.7	50403	48049.1	45625.1	51885.7	47383	53497.2	51934.8	50839.3	51036.3	51961.4	61582.9	63959.4	56355.6	55678.8	49003.1	45897.4	48530.8	56053.2	43441.1	52307.4	59050.9	50631	55801.5	55157.1	51335.5	54996.2	60158	48459.1	56009	52420.4	49707.8	48866.9	30448.1	41046.2	57590.4	55315.7	52051.6
A0A0D9R008	A0A0D9R008	A0A0D9R008_CHLSB	ARFGAP3		18228.8	10599.2	15756.1	13558.5	14222.3	14647.7	17047	13391.4	15914.6	16778.8	13817	14554.3	17010.4	13182.7	15266.4	17107.7	12929.9	16410.2	14144.6	10983.8	14728	16157.4	15671.5	17760.6	17565.2	16709.2	15252.1	16775.9	15103.2	15566.3	19040	11623.4	17538.9	15745.3	13843.3	13944.2	16324.2	15047.2	16320.7	18337.3	13364.9	15601.2	20806.6	16441.8	19383.2
A0A0D9R009	A0A0D9R009	A0A0D9R009_CHLSB	BLOC1S2		3545.98	1765.41	2193.29	3072.44	3159.32	2208.27	2438.3	1822.16	2067.9	2460.57	2733.96	1850.51	2489.19	2278.23	2903	2570.29	2932.9	3015.22	3508.99	2502.62	3161.42	2478.41	2583.88	2026.61	2250.1	1567.79	2386.85	2528.37	1512.66	1940.71		3365.67	3526.67	1881.29	2189.68	2562.58	2448.17	2123.96	2631.51	2346.75	2661.55	1906.98	3174.26	2617.74	2049.74
A0A0D9R011	A0A0D9R011	A0A0D9R011_CHLSB	CYB5R3		26645.2	31422.5	31300.4	22737.5	29382	29258.7	39168.4	21324.6	26878.5	30927.5	25438.9	22338.8	36064.8	42877.9	39822	32739.7	37693.1	42992.3	26385.3	22763	25715.6	25753.9	22136.7	24598.4	36930.1	26640.3	30862.1	23326.8	24986.4	25092.5	31179.4	37209.1	50223.8	25920.2	25989.5	26457.4	37042.7	45696.7	28302	31889.9	42398.3	31495.1	23972	28807	33643.7
A0A0D9R012	A0A0D9R012	A0A0D9R012_CHLSB	CWF19L1		18899	18471.6	24469.1	21286.8	18733	21817.8	19169.9	22839.2	18253.8	15781	22260.3	19233.4	19266.3	18649	20965	18467.3	19992.8	16902	19613.9	18470.2	15094.4	17799.9	16991.1	19827.5	15054.2	18577.8	16783.9	22075.7	17332.5	18649.9	14535.9	15524.4	15228.5	14112.3	16777.2	12058.1	12748.2	15514	16008.3	15891.5	9275.44	10501	17737.4	15686.4	15257.1
A0A0D9R013	A0A0D9R013	A0A0D9R013_CHLSB	KRT1		18061.8	19355.3	16383.1	18010.6	20921	15885.6	16577.6	13206	14330.5	22465.9	12878.7	15393.5	19586.8	16113.1	15471.7	16979.1	19694.9	16573.6	16542.6	11449.2	11476.2	14054.2	17309.3	16276.8	16913.5	21190.7	12767.1	20252.6	21034.7	17121.7	12935.4	12299.5	15192.1	21890	16803.3	23026.1	16618.3	13300.7	13756.2	14394.5	99002.7	28617.3	14421.5	12975.3	19255.2
A0A0D9R013;A0A0D9R016	A0A0D9R013;A0A0D9R016	A0A0D9R013_CHLSB;A0A0D9R016_CHLSB	KRT1;KRT2											10553.3															6590.03		10932.2									10984			8594.02		105495	28173.3
A0A0D9R013;A0A0D9R016;A0A0D9QZZ8	A0A0D9R013;A0A0D9R016;A0A0D9QZZ8	A0A0D9QZZ8_CHLSB;A0A0D9R013_CHLSB;A0A0D9R016_CHLSB	KRT1;KRT2;KRT77		29909.4	20882.6	14735.4	25061.6	30641.8	19971	20788.7	21387.9	9542.48	21639	17708.9	16875.3	22270	18298.1	14618	15575.1	22765.4	21218.6	16922.4	10505.2	8577.27	16402	16509.3	20400.1	16847.6	23426.3	12956.7	24868.7	29695.2	24909	10963.7	9969.95	15650.9	21745.2	21732	31834.8	24758.7	15616.1	16809.8	14604.5	101974	26277.2	13172	16392.2	16999.5
A0A0D9R013;A0A0D9R0H0	A0A0D9R013;A0A0D9R0H0	A0A0D9R013_CHLSB;A0A0D9R0H0_CHLSB	KRT1;KRT7		67277.6	13904.7	31182.8	30822.8	37769.3	34960.8	64660.7	12407.3	35265	61578.6	12536.2	14204.8	43970.7	18222.2	41115.5	27104.8	25461.6	53523.6	23168.1	8009.73	24057.9	35581.6	25592.7	33503.1	46620.3	36033	49951.4	39813.8	36680.7	51650	29933.1	5286.73	37495.2	31824.4	21844.2	89333.8	33980.5	11419.2	51067.6	26515.7	362538	111523	54349.7	15897.6	47972.7
A0A0D9R014	A0A0D9R014	A0A0D9R014_CHLSB	SRSF1		124914	84657.7	128830	106408	92730.8	115284	117937	87070.1	117689	161246	112353	108179	117778	97830.4	120032	126949	97780.3	125031	110846	99505.6	126419	115960	97081.2	112141	134816	123785	163168	117088	105157	121677	121544	87193.4	134166	127435	104000	144922	109991	83551.5	152793	121423	145825	135007	166273	109858	130974
A0A0D9R014;A0A0D9S4J2	A0A0D9R014;A0A0D9S4J2	A0A0D9R014_CHLSB;A0A0D9S4J2_CHLSB	SRSF1;SRSF9		56629.9	52417.1	58855.5	62176.4	52253.2	54347.3	49388.6	49469.5	49559.2	53291.9	67727	61639.8	58870.8	54488.6	52554.1	62717.9	51511.3	49706.4	67897	62395.7	53972.2	58872.4	58246.3	59476.2	65877.8	69636.8	52879.4	68952.6	68708.1	50413.5	65861	64747.8	47184.6	67536.9	67043.5	44416.8	73940.3	68203.7	53106.4	71523.4	17336.4	36351.2	62043.3	62303.5	56147.5
A0A0D9R015;A0A0D9SC74	A0A0D9R015;A0A0D9SC74	A0A0D9R015_CHLSB;A0A0D9SC74_CHLSB	DYNLL2		33369	33116.1	31663.3	28804.9	26499.4	27958.2	25823.1	29174.8	23116.5	21967.2	26356.5	24785.2	29765	26168.1	24932.9	30744.6	26238.3	27632.8	25836.7	26739.2	24305.1	24835.6	31765	27909.3	24319.8	28537.7	31189.3	27279.7	30686.6	28123.1	30999.7	33708.6	34075.5	33459.9	29643.2	30111.8	27394.1	27090.1	25083.8	28033.2	7576.39	25329.8	32933.7	30418.8	29346.5
A0A0D9R016	A0A0D9R016	A0A0D9R016_CHLSB	KRT2		1049.43	1290.73		686.161	1939.39	2092.06	1817.71	1423.61		1536.61		1161.84	1455.64									935.105	837.631	1578.99	1262.85	3538.93	2194.96	2160.06	1709.27	1217.89				1044.53	1350.62	2987.57	1312.49		1571.99		9891.5	4729.02			805.096
A0A0D9R016;A0A0D9QZW2;A0A0D9QZY9;A0A0D9QZZ8;A0A0D9R041;A0A0D9R049;A0A0D9R058;A0A0D9R070;A0A0D9R0A1;A0A0D9QZW8;A0A0D9R022;A0A0D9R030;A0A0D9R055;A0A0D9R0H0	A0A0D9R016;A0A0D9QZW2;A0A0D9QZY9;A0A0D9QZZ8;A0A0D9R041;A0A0D9R049;A0A0D9R058;A0A0D9R070;A0A0D9R0A1;A0A0D9QZW8;A0A0D9R022;A0A0D9R030;A0A0D9R055;A0A0D9R0H0	A0A0D9QZW2_CHLSB;A0A0D9QZW8_CHLSB;A0A0D9QZY9_CHLSB;A0A0D9QZZ8_CHLSB;A0A0D9R016_CHLSB;A0A0D9R022_CHLSB;A0A0D9R030_CHLSB;A0A0D9R041_CHLSB;A0A0D9R049_CHLSB;A0A0D9R055_CHLSB;A0A0D9R058_CHLSB;A0A0D9R070_CHLSB;A0A0D9R0A1_CHLSB;A0A0D9R0H0_CHLSB	KRT2;KRT3;KRT5;KRT7;KRT71;KRT72;KRT73;KRT74;KRT75;KRT76;KRT77;KRT79		24870.1	11250.5	19185.1	14725.5	11608	15841.2	23905.4	6416.63	12293	13892.1	12421.5	7718.26	5715.08	9649.39	16743.4	65662.3	20420	39630.2	43890	47329.4	29042.4	17899.6	16245.8	14342.2	22424.2	84431.2	59792.1	10814.7	23034.1	8704.96	25351.8	46326.4	25242.7	24911.3	32147.5	20178.5	11320.4	13927.2	7807.17	16134.8	36305.1	26103.9	142510	22853.8	38754.3
A0A0D9R016;A0A0D9QZW2;A0A0D9QZY9;A0A0D9R058;A0A0D9R070;A0A0D9R0A1;A0A0D9QZW8;A0A0D9R055;A0A0D9R0H0	A0A0D9R016;A0A0D9QZW2;A0A0D9QZY9;A0A0D9R058;A0A0D9R070;A0A0D9R0A1;A0A0D9QZW8;A0A0D9R055;A0A0D9R0H0	A0A0D9QZW2_CHLSB;A0A0D9QZW8_CHLSB;A0A0D9QZY9_CHLSB;A0A0D9R016_CHLSB;A0A0D9R055_CHLSB;A0A0D9R058_CHLSB;A0A0D9R070_CHLSB;A0A0D9R0A1_CHLSB;A0A0D9R0H0_CHLSB	KRT2;KRT3;KRT5;KRT7;KRT75;KRT76;KRT79																																												4835.44
A0A0D9R016;A0A0D9QZY9;A0A0D9R058;A0A0D9R070	A0A0D9R016;A0A0D9QZY9;A0A0D9R058;A0A0D9R070	A0A0D9QZY9_CHLSB;A0A0D9R016_CHLSB;A0A0D9R058_CHLSB;A0A0D9R070_CHLSB	KRT2;KRT76		4307.11						5828.05			5645.54								4622.2				4935.48									4176.54					8672.76					37296.5	9791.64
A0A0D9R019	A0A0D9R019	A0A0D9R019_CHLSB	BABAM1		5833.1	3880.64	4361.75	3058.03	3534.77	3320.62	3864.61	3679.04	5709.3	3218.86	3467.89	3798	3514.18	3642.15	3510.37	3694.83	3316.71	4950.54	3761.29	3790.54	3775.39	3432.33	4797.63	3477.22	3870.9	4198.46	5978.96	3338.73	3635.64	4323.71	4274.77	2366.67	4771.43	4126.19	3323.7	5359.05	2945.19	4243.09	5376.33	3584.54	3775.39	3989.35	4399.25	4105.07	4424.18
A0A0D9R023	A0A0D9R023	A0A0D9R023_CHLSB	NR2F6											2081.49			2278.66																								2551.99			2777.26
A0A0D9R025	A0A0D9R025	A0A0D9R025_CHLSB	USE1		888.989	1333.89	1177.63		782.597		749.396	918.396	232.397			550.705		1023.32	1211.6	563.566	1771.95	1295.03	929.813	1354.18	802.04	470.001	369.161	704.475		820.634		447.28	630.776		1608.63	1414.12	1258.77	495.302	821.999		1547.07	1312.7	674.369	409.152		554.166		715.739	833.359
A0A0D9R026	A0A0D9R026	A0A0D9R026_CHLSB	PHF21A		394.29	358.326	700.387	663.206	741.782	645.665		315.18		440.697			217.098	711.402		947.051	509.682		623.007		549.491	611.131	714.656	524.312	303.29	259.043		1014.76	367.777				582.579	448.678			492.965		572.042	745.311		708.694	652.299		320.965
A0A0D9R027	A0A0D9R027	A0A0D9R027_CHLSB	POLDIP3		26819.1	20443.7	25261.1	25568.1	27441.3	25763.5	27640.9	19456.8	27641.1	19431.6	28512.2	23023.4	23754.8	26425.3	27128.2	25569.1	26524.2	29050.9	26625.7	23168.6	28840.2	23587.7	25337.6	27134.4	25136.7	24214.8	26945.1	22051.7	24001	26358.6	23172.9	22109.9	28647.2	26958.6	25146.4	25730	26496.3	25589.8	27464.9	21234.3	17932.3	21251.6	29579	24445.1	28174
A0A0D9R028	A0A0D9R028	A0A0D9R028_CHLSB	RRP7A		7721.14	7594.03	9472.77	8619.13	8396.39	8975.21	8794.65	6664.4	7350.32	6618.4	7759.66	8022.89	8069.6	6817.22	8319.82	9139.99	8988.6	8941.28	9926.73	7964.22	8797.9	8644.94	6885.7	7745.24	7481.26	7294.23	6734.77	8397.11	8225.77	7299.49	8292.13	8445.99	8962.81	9093.07	8560.99	8469.93	8584.68	8686.52	6889.91	8770.58	3652.42	6005.11	8355.79	7626.28	7906.62
A0A0D9R033	A0A0D9R033	A0A0D9R033_CHLSB	CHUK		85570	73393.2	75809.6		73290.5	92588.1	79821.2	94441.4	89327	100522	89370.3	79760.3	95604.7	95514	101866	108150	106435	123647	117403	111478	116792	110868	85229.8	104629	115922		85805.8	96919.4	111732	108539	130717	127788	129651	136554	127932	119790	114809	95934.7	128232	103685	77659.4	58554.6	131045	132873	134254
A0A0D9R034	A0A0D9R034	A0A0D9R034_CHLSB	DGKZ		15367.7	19640.3	23728.8	12365.8	17837.7	12043.4	10532.4	9906.68	10804.8	9984.39	13459.4	9815.08	14432.3	13177.9	13937.5	26121.9	21927.6	17123.7	14224.8	11441	16644.7	14792.5	11022.8	8564.6	13075.6	13746.3	11530.1	17730.3	14337	15461.7	26533.6	17504.8	15420.6	10781.6	20500.7	12280.7	10410.2	9701.98	9060.56	14693.3	130465	22249.4	16451.4	8426.27	12694.5
A0A0D9R036	A0A0D9R036	A0A0D9R036_CHLSB	MYO9B		1636.12	1643.72	2988.62	2518.22	2533.18	3556.76	3809.13	2266.92	3918.13	3347.99		1829.02	2369.77	2777.55	2287.67	2400.26	2612.26	3279.07	3601.42	3031.76	3866.11	3541.13	2704.84	3254.61	3633.86	1249.52	1957.95	2624.61	3464.45	2555.42	2053.71	3315.36	2656.7	3663.97	3695.99	2660.72	3578.67	3394.14	3747.83	3342.52	1843.99	2838.64	2109.02	2096.55	3178.34
A0A0D9R038	A0A0D9R038	A0A0D9R038_CHLSB	ERLIN1		4122.12	4874.32	3534.03	3124.29	3482.21	3955.9	6071.37	2698.81	4320.7	4522.88	4365.16	3100.85	4281.51	4475.98	4810.46	5606.67	5941.49	6309.01	4362.16	3161.24	4996.15	4863.72	4182.54	3728.01	5079.27	5556.13	4222.43	3247.53	3864.87	3599.16	5337.95	5503.8	6520.33	4296.68	3036.38	5284.39	5327.56	5454.71	4662.88	3997.98	3890.22	3465.91	3492.44	3603.14	4524.06
A0A0D9R038;A0A0D9RSX3	A0A0D9R038;A0A0D9RSX3	A0A0D9R038_CHLSB;A0A0D9RSX3_CHLSB	ERLIN1;ERLIN2		5527.69				4109.76	3836.71	5453.82		7805.16	7160.58			5813.57		7889.98	3919.08	4132.85	7751.56	3668.25		6186.39	5801.13	4247.08	4479.63	7966.69	5170.52	7264.47	6114.73	4635.29	6867	6425.68		9701.69	5694.24	2770.63	10313.2	7870.51		8995.49	7237.13	6512.72	10232.4	5056.46	3777	6903.48
A0A0D9R039	A0A0D9R039	A0A0D9R039_CHLSB	CPN1		8477	5283.72	9728.28	8525.19	10505.2	9240.95				6938.22	8386.71		7868.52	6864.15	10432.8	8544.83	8890.38	9467.4		4841.86	7973.8				6192.89	6573.37	6297.06			7741.47		8352.7	8864.01	10085.9	6935.46					7348.83	8884.95	4965.17	7846.41		8168.07
A0A0D9R040	A0A0D9R040	A0A0D9R040_CHLSB	TCF20		5586.53		7682.99	8320.87	6332.5	6513.26	6405.83		5600.48	6139.84	3972.32	6693.96	6164.09	5869.2	6750.13	5890.43	5794.81	5550.12	6530.17	5231.28	5919.97	5608.53	5915.83	6950.2	6941.62	7425.21	5864.38	6449.78	4349.12	6342.42	6632.75	3157.82	7038.61	4442.11	6127.5	2924.11	5775	4079.91	4801.61	5724.17	3895.99	3205.65	6584.4	5945.3	6524.28
A0A0D9R041;A0A0D9R049	A0A0D9R041;A0A0D9R049	A0A0D9R041_CHLSB;A0A0D9R049_CHLSB	KRT71;KRT74		11140.7	16222.5	25729.4	14207.9	13633.4	15957.7	18463.9	16875.8	12683.8	9216.9	25493.2	40220.9	11248.7	21537.8	13346.8	21076.2	30952.2	22117	17017.8	20741.6	14606.3	46634.7	20507.3	12907.3	17171	40878.4	23401.1	10925.5	37761	15662.3	37398.8	40387.8	14011.6	30239.3	26107.8	16937.9	7274	16508	11392.4	33949.9	19278.8	18572	54524.5	28238.7	16598.8
A0A0D9R042	A0A0D9R042	A0A0D9R042_CHLSB	HAUS8		18552.1	8330.07	24860.1	20522.2	24306.8	21271.2	17799	5919.87	19312.4	20004.8	22677.2	20349.2	16081.4	19053.7	21512.3	16873.5	20130.9	18290.9	17568	9792.98	18546.5	19401.8	17137.7	17779.1	23114.9	16565.5	13675.1	21311.5	17402.5	18052.3	21043.1	8047.18	22425.2	19326	18723.3	16999.4	20961.8	13575	18716.1	17144.6	9450.73	15069	17857.7	17664.2	16618
A0A0D9R044	A0A0D9R044	A0A0D9R044_CHLSB	AMBRA1		2802.15	2293.35		2568.73		2953.1	2101.73	1669.96	1299.5	1443.55		1866.39	1836.55	1226.43		2235.2	2242.92	2101.4	2654.47	2636.76	2676.52	1926.59	2150.31	1983.09	2345.52	2433.74	1818.64	1462.23		1059.94	2336.25	2092.5	2602.63	2963.51	2462.6	1321.36	3634.13	2683.25	1815.04	2717.46	3382.56	1609.24	1715.03	2362.61	2428.87
A0A0D9R050	A0A0D9R050	A0A0D9R050_CHLSB	ATG13			4319.39		3846.92		4333.1			3457.66	2482.16	3324.51	3860.91	3278.81	4182.93		3845	5494.36	3613.24	4148.63	3908.72		3790.47	4300.79	4498.4	3338.63	3057.56			3782.3		3650.45	4576.74			3950.87	3885.78	4395.79	5725.96		2686.98
A0A0D9R051	A0A0D9R051	A0A0D9R051_CHLSB	ARHGAP1		31915.1	31799.8	31383.7	31175.3	32403.2	31116.8	30294	34762.6	37415.1	34933.7	31826.6	28216.2	33158.3	29830.7	32179.3	29288.3	30321	31556.8	28082.1	26693.5	33321	31974.1	33739.2	30662.8	30960	27454.5	30379.5	31265.6	28892.2	33293.3	31654.5	27685.2	34417.4	31738.8	33132.6	31728.2	33400.6	31353.9	35226.6	29417.9	29765	29326.9	24189.4	28455.9	31741.2
A0A0D9R054	A0A0D9R054	A0A0D9R054_CHLSB	F2		16555.9	10702.4	11981.8	9734.88	8848.59	9181.14	10121.6	7611.64	10439.8	9891.44	7566.82	10052.8	8430.85	10566.3	9938.83	16543.6	14679.9	16625	12130.9	10319.8	13011.9	9720.42	8698.96	7212.4	8944.51	10214.6	11240.6	11468.8	9024.82	10770.8	15779.8	12399.4	18646.8	10889.1	7429.32	11524.5	9186.5	8314.02	7744.35	9354.26	66717.8	28370.8	9652.57	8677.15	10433.7
A0A0D9R055	A0A0D9R055	A0A0D9R055_CHLSB	KRT5		113890	11646.5	46794.3	56177.4	73448.2	75165.4	182606	14466.8	186716	191474	44381.8	30448.3	104186	53967	127649	123993	41577.6	153874	88402.2	18132.3	173395	133545	98749.4	133576	186565	168911	242246	106598	112103	155492	166759	21798.8	190740	174998	59653.2	235585	144546	52280.6	205497	154830	214241	206286	197511	47241.3	164228
A0A0D9R056	A0A0D9R056	A0A0D9R056_CHLSB	CKAP5		35164.4	33081.1	31292.2	31282.9	31206.5	32056.4	34454.7	33174.3	33917.4	30664.6	32551.1	30756.7	28839.2	34297.1	31645.7	33268.2	33168.7	34548.4	32540.3	33474.3	34215.8	32927.6	32175.8	34751	34041.6	31014.7	31605.2	30799	33997.1	33101.3	33485.6	36688.4	34695.8	32042.3	32817.3	32250.2	33314.2	32618.8	33683.9	32248.6	32374.2	34908.2	32553.5	33231.2	35922.5
A0A0D9R058;A0A0D9R070	A0A0D9R058;A0A0D9R070	A0A0D9R058_CHLSB;A0A0D9R070_CHLSB					39156	49611.2		10210.3	8251.81		8977.51	7646.22	27937.1			31826.8		4534.58		9049.94	6420.7		8931.93	8503.51		7397.12	8142.39	7529.33	9193.48		5426.03	6903.18	10571.3		9398.82	8601.21		12235.8	6304.83	5243.49	10033.1	11556.5	20043.9	14700.2	9384.76		6720.54
A0A0D9R059	A0A0D9R059	A0A0D9R059_CHLSB	SIN3B		3184.13	3258.26	2986.43	4114.32	3617.42	3311.21	3026.2	3223.72	2424.17	2347.41	2633.04	2873.06	2840.03	2508.37	2445.61	3586.89	4582.05	3813.08	3964.93	3563.19	3417.85	3474.48	3164.64	3080.36	2467.49	3119.6	2168.2	2795.75	2488	2456.96	3932.96	3332.47	4137.47	3928.19	3590.94	2764.31	3799.64	3281.22	1990.69	2617.46			1880.64	3315.51	2654.65
A0A0D9R062	A0A0D9R062	A0A0D9R062_CHLSB	ABCC2		16379.3	20890.6	17149.2	14963.9	19332.3	17018.9	24811	17492.7	17569.3	19497.4	18806.6	18509.4	22948.9	28008	25849.1	15192.9	23898.9	24638.3	16445.4	17573.8	15669.2	16293.8	18141.5	18226.3	20668.4	20110.4	19248.1	16286.7	20457	19048.3	14360.7	19731.1	27440.3	17572.3	15429.6	16786.1	25240.1	29463.5	17829.5	19257	17513	19180.8	13249.5	19016	24614.5
A0A0D9R064	A0A0D9R064	A0A0D9R064_CHLSB	ARFGAP2		21598.2	17174.1	21020.2	20699	19481.9	19994.6	19984.2	14452.5	18419.7	17696.6	17099.9	17434.9	18888.8	17099.2	20013.5	23765.2	19858.8	20721.4	19611.1	17734	21450.5	21057.9	21708.4	20703	17701.4	18366	20035.2	19114.9	16128.6	18306.3	22799.1	17416.6	19611.9	20249.2	18936.4	18946.5	18026.2	16169.4	18779	19131.4	11839.2	16413.8	22447.1	16834.3	17959
A0A0D9R064;A0A0D9R008	A0A0D9R064;A0A0D9R008	A0A0D9R008_CHLSB;A0A0D9R064_CHLSB	ARFGAP2;ARFGAP3		7946		5110.58	6504.27	5029.11	6804.4	7834.53	2262.49	4721.56	6068.41	7012.93	6155.74	5385.36		3978.58	6746.1		5066.88	6751.53	3623.85	6584.1	7476.2	4983.3	5746.59	8373.17	9411.38	9996.94	7240.48	6415.2		6836.33	6894.52	4937.42	6950.95	3680.2	5538.79	8052.4	7741.61	5750.38	8928.63	9805.05	8974.01	4065.12	4436.9	4350.32
A0A0D9R065	A0A0D9R065	A0A0D9R065_CHLSB	DDB2		5954.35	5182.79	7521.88	5718.88	7323.38	7313.53	7236.98	6889.21	7590.48	7379.35	6511.96	5930.26	6750.22	6807.63	6637.52	6074.78	4847.72	6672.44	5555.36	4404.95	5534.3	6752.64	6141.82	5373.26	8362.36	6359.07	7748.61	7604.54	6841.32	6470.14	6838.17	5266.99	6631.71	5413.44	5043.55	6650.95	6427.49	6735.59	6529.13	6419.89	6899.08	6707.93	6196.23	6847.99	6085.44
A0A0D9R066	A0A0D9R066	A0A0D9R066_CHLSB	PACSIN3		11242.5	7499.51	7962.78	6815.07	8300.24	8286.9	9670.09	8567.97	9063.68	11938.9	7615.84	7270.11	7880.31	6485.19	6642.12	8688.46	7385.31	8897.63	8031.71	7479.93	9220.13	9649.07	6924.99	8642.49	9664.11	9645.58	11753.3	8482.09	7243.06	8042.92	8783.66	8626.49	9830.94	9226.19	5962.51	11126.7	8842.35	7605.12	10366	9477.77	15427.7	12782.9	11103.7	7451.56	9942.23
A0A0D9R068	A0A0D9R068	A0A0D9R068_CHLSB	ACP2		6553.61	7866.52	9225.79	6663.46	9115.91	9787.3	9045.05	6583.19	4011.2	4705.41	7317.19	7290.17	7466.87	7774.16	8828.32	6694.42	10910.7	11428.7	8363.99	6556.83	6979.9	8024.89	8268.74	8901.21	6878.69	7109.54	4514.6	6749.29	8568.86	6981.8	7351.47	8223.92	7400.17	8074.79	9173.25	5267.67	8845.26	7479.5	4919.52	8023.75	4236.83	6626.32	5803.67	6927.76	6667.38
A0A0D9R071	A0A0D9R071	A0A0D9R071_CHLSB	NDUFA6		4348.43	12791	6888.95	5769.61	7198.26	7377.03	5278.33	10005.8	6205.25	5803.52	5958.38	6356.52	5359.35	6278.95	5357.48	7484.39	5260.3	6045.61	6322.71	10836.3	6121.24	6154.25	6629.19	4768.69	4660.48	4252.25	3203.73	6003.66	6217.61	4849.45	6283.15	9644.05	6321.32	6868.27	3903.71	6808.57	4855.21	7377.61	3500.44	3931.23	6407.78	4549.59	3927.77	5555.35	4537.03
A0A0D9R072	A0A0D9R072	A0A0D9R072_CHLSB	MADD		4478.53	3512.01	4331.63	3505.45	3364.67	3395.03	4976.35	4610.28	6966.47	5223.64	4302.41	4526.13	3873.47	4123.59	4749.4	2679.46		3991.22	2462.91	2863.88	4208.06	3375.91	4189.99	4116.84	5010.19	3411.67	6747.93	4128.96	5024.38	3346.38	5176.59	2810.88	3971.12	3178.69	4347.21	6469.73	3163.47	2723.65	6701.62	4734.42	10626.3	8562.86	3534.4	5320.23	5390.56
A0A0D9R074	A0A0D9R074	A0A0D9R074_CHLSB	MED26		3083.27					1699.15	2569.13		1856.7	1952.91															2222.49		1946.35			2223.43						2579.92	1887.74					1834.66	4144.18
A0A0D9R075	A0A0D9R075	A0A0D9R075_CHLSB	SMDT1		2643.72	1075.62	1330.04	1455.91	2088.03	3992.65	2515.22	1084.14	2430.49	3138.64	2812.38	1323.57	3193.09	2752.71	2715.56	2884.96	3301.43	3856.24	3103.74	1071.24	2090.77	2542.71	3349.72	2318.16	4208.57	3632.19	2649.87	1853.76	2606.88	2392.84	2677.47	1851.13	3445.62	3938.93	2141.47	2960.73	3014.97	2987.98	2645.54	1821.16		2453.39	1111.79	2148.01	2837.24
A0A0D9R077	A0A0D9R077	A0A0D9R077_CHLSB	SLC35E1			1725.87	1328.32		1942.46		2233.33	2480.09	2787.4				2568.79	2038.05			2614.18	2894.13	1612.59	1768.06	2044.82	1849.69	2176.18	2774.62	2102.33	1353.44	1342.07		2677.94			1994.41	3079.02		2168.85	1242.86	2441.98	2201.18		2450.38		361.147		2402.29	1640.47
A0A0D9R078	A0A0D9R078	A0A0D9R078_CHLSB	CUTC		5946.92	7401.01	7744.9	7854.63	8201.24	7152.11	7713.36	5622.56	6945.77	8140.42	8099.55	10155.1	7841.1	6859.92	6700.71	8816.76	7323.39	5902.22	6148.41	6255.59	7418.49	6267.62	7994.32	7630.12	6714.28	7082.22	7861.1	5968.32	6790.82	8195.22	8292	5823.78	7692.97	5632.96	5494.8	8213.14	5144.13	6236.87	7125.92	5277.25	17176.3	8185.55	6358.47	7568.86	6713.93
A0A0D9R080	A0A0D9R080	A0A0D9R080_CHLSB	NAGA		8423.69	5630.87	6515.64	5918.83	7272.3	6985.62	7723.35	5275.17	8011.32	8901.32	7998.37	5693.39	7600.01	4500.11	8146.99	7950.98	6946.22	9435.02	6670.84	4880.42	8346.22	7008.85	7284.75	7304.55	7452.65	7478.68	8789.31	6136.81	6705.57	7122.66	8215.07	5984.81	9748.99	8090.54	6597.5	8331.98	5480.09	5424.32	7970.91	7511.16	13556.9	9609.03	7544.82	5256.01	7968.71
A0A0D9R082	A0A0D9R082	A0A0D9R082_CHLSB	FUS		107839	82888	104821	104838	108724	103892	93200.5	80470	88802.8	102095	118553	95486.9	98669.5	75785.5	99403.3	126223	89504.4	102215	111160	91808.8	107047	88703.5	95988	109456	88142	108390	106623	94807.6	98061.8	96466.2	102665	83270.2	88175.3	97964.2	94306.5	91673.1	76054.2	85900.3	72607.8	87350.1	96045.5	80998.2	112842	97224	90971.7
A0A0D9R082;A0A0D9R1Q0	A0A0D9R082;A0A0D9R1Q0	A0A0D9R082_CHLSB;A0A0D9R1Q0_CHLSB	FUS;TAF15		20853	17126	12118.3	15127.8	17459.3	24189.4	43105.1	22510.4	56413.3	40759.2	13732.3	16042.2	39358.4	12967.7	31187.5	30585.4	12433.7	39203.8	17838.1	11114	46358.8	41308.6	24884.4	37263.1	71690.5	28605.4	95313.6	43937.1	39455.4	49457.6	82795.6	15236.1	123793	77790.1	27622.8	164458	73822.6	31277.4	203579	96511	155280	225612	92441.2	50180.6	119801
A0A0D9R083	A0A0D9R083	A0A0D9R083_CHLSB	COX15														2216.06	2139.46				1776.57	1240.17				1709.94												2485.93									1718.93
A0A0D9R091	A0A0D9R091	A0A0D9R091_CHLSB	GOT1		41386.1	32013.4	35148.7	38098.9	37609.6	36133.2	48121.4	37243.4	48251.1	38146.1	44405.6	37624.4	42565.5	36203.2	43193.9	36780.7	34596.4	38747.2	39038.5	34144.1	39682.2	42498	43337.5	45324.5	49295.8	52640.1	51744.4	47393.4	44931.3	47490.3	40261.8	34448.8	39442.1	41049.9	38429.5	46403.9	44871.5	38883.8	52208.9	46856.5	41379.1	48949.4	52992.7	44013	51503.2
A0A0D9R093	A0A0D9R093	A0A0D9R093_CHLSB	CHERP		30783.1	25410.2	29875.3	31812.3	29886	28475.3	29267.4	27431.5	31006.2	31561.3	32114.2	31818.7	30645.2	31520.9	27681.1	33071.8	27654	31576.9	31577.2	29646.8	29824	29408.4	33579.1	30282.3	31369.2	33014.7	29114.5	32667.7	32245.8	34780.5	31657	27297.9	32350.2	32203.4	30494	29768.7	30784	30406	30852.7	33158.5	33698.2	34942.2	34250.8	30782.6	33668.3
A0A0D9R096	A0A0D9R096	A0A0D9R096_CHLSB	CENPM		6992.57	5006.76	6000.94	5544.01	5295.56	5860.21	5125.27	3283.07	4274.83	4333.36	2934.36	4226.21	3408.78	3300.3	3523.61	6473.93	4382.57	5382.65	5865.45	5691.16	5608.7	6533.13	4607.33	4473.18	5438.74	4415.56	4322.4	3313.98	3550.85	4081.32	5237.65	4312.19	6303.83	7398.95	4119.7	4643.8	4818.83	3002.98	4344.83	5772.9	3521.69	2579.37	4276.82	2643.09	3932.72
A0A0D9R097	A0A0D9R097	A0A0D9R097_CHLSB																2179.56			2325.3		1539.07															1520.68	1346.02			1960.32	813.99
A0A0D9R0A3	A0A0D9R0A3	A0A0D9R0A3_CHLSB	HPS1		5145.77	5441.29	4667.69	4177.1	4141.23	4261.56	3369.34	4857.47	4308.04	4041.83	4367.06	5788.29	3655.28	4226.22	3814.29	5506.96	3367.13	3466.75	4020.86	5321.71	2808.41	4518.84	4988.85	5490.09	2813.89	4145.46	3330.35	3891.36	3850.24	4007.94	3424.46	4063.73	3756.06	3471.63	4415.88	2959.43	4183.71	4251.57	3481.95	3973.74			4042.89	5045.23	4193.74
A0A0D9R0A4	A0A0D9R0A4	A0A0D9R0A4_CHLSB	KAT8		1950.49	3441.03	3633.2	3226.56	3393.13	2602.92	2382.87	3504.2	2692.89	3190.79		3725.46	3513.28	3298.09	3099.43	4468.47	4330.71	3091.36	3894.39	3904.44	2640.04	2820.31	2826.13	3379.74	2816.51	3466.2	3649.23	3138.18	3269.03	2419.22	3350.34	4174.97	1137.79	3562.24	2734.48	3878.95	3078.6	3117.43		2650.11			4036.85	5146.41	3929.09
A0A0D9R0A5	A0A0D9R0A5	A0A0D9R0A5_CHLSB	BCKDK		6850.71	6171.8	6075.65	6836.86	5948.12	6599.19	6757.13	6392.85	6578.04	6255.75	5482.16	5147.76	5669.96	6863.41	5317.08	6593.79	6535.49	6839.18	6562	5203.48	7084.42	7218.07	5647.4	6674.74	5395.97	6073.23	4168.72	5543.85	5189.81	6358.38	4866.43	6960.66	6899.68	6340.14	5254.53	5547.15	5656.09	4954.82	5674.51	5638.52	9335.54	8005.33	4363.39	5423.42	5092.68
A0A0D9R0B0;A0A0D9R0B5;A0A0D9R0B8;A0A0D9R0D4	A0A0D9R0B0;A0A0D9R0B5;A0A0D9R0B8;A0A0D9R0D4	A0A0D9R0B0_CHLSB;A0A0D9R0B5_CHLSB;A0A0D9R0B8_CHLSB;A0A0D9R0D4_CHLSB	KRT81;KRT82;KRT83;KRT85																																					5259.85					6882.08
A0A0D9R0B0;A0A0D9R0B5;A0A0D9R0B8;A0A0D9R0D4;A0A0D9R0G6	A0A0D9R0B0;A0A0D9R0B5;A0A0D9R0B8;A0A0D9R0D4;A0A0D9R0G6	A0A0D9R0B0_CHLSB;A0A0D9R0B5_CHLSB;A0A0D9R0B8_CHLSB;A0A0D9R0D4_CHLSB;A0A0D9R0G6_CHLSB	KRT81;KRT82;KRT83;KRT85					2488.76		2998.84										2836.36		6197.91	2114.73		2571.82												5380.73			4149.7	2485.27
A0A0D9R0B2	A0A0D9R0B2	A0A0D9R0B2_CHLSB	CCDC134		2709.75	2390.31	2460.52		3085.99	2449.38	3000.59		3271.97	2931.24		2777.71	3227.85	1866.4	2446.39	1538.45	1958.81	2669.82	3797.31	4163.69	2096.27	1844.48	2987.9	2072.04	2595.61	2668.88	3016.28	3513.86			2545.13		2445.4			3174.75		1253.97	3038.26	2479.33	2637.05	2729.3	2712.95		3353.64
A0A0D9R0B5;A0A0D9R0B8;A0A0D9R0D4;A0A0D9R0G6	A0A0D9R0B5;A0A0D9R0B8;A0A0D9R0D4;A0A0D9R0G6	A0A0D9R0B5_CHLSB;A0A0D9R0B8_CHLSB;A0A0D9R0D4_CHLSB;A0A0D9R0G6_CHLSB	KRT81;KRT83;KRT85		3640.48	8230.51	5306.39	3773.32	4937.33	5580.21		2889.3		1540.36	2335.35	2234.94	2086.43	2148.07	2091.41	3554.11	6976.83	5868.07	4035.53	5783.57	4829.85	2892.57	3210.19	3635.48	1709.83			2071.25		1954.1	3108.02	7200.45	5973.96	3074.8	5296.08	3861.78	3722.64	3488.85		2113.06		4142.66	3470.48	3045.7
A0A0D9R0B5;A0A0D9R0B8;A0A0D9R0G6	A0A0D9R0B5;A0A0D9R0B8;A0A0D9R0G6	A0A0D9R0B5_CHLSB;A0A0D9R0B8_CHLSB;A0A0D9R0G6_CHLSB	KRT83;KRT85																	5043.22		9646.71										6119.84
A0A0D9R0B6	A0A0D9R0B6	A0A0D9R0B6_CHLSB	STX4		7200.06	8607.37	8676.92	6647.74	8697.36	8080.27	9320.98	7974.26	6624.21	6715.35	8767.64	9062.68	10771.7	11929.2	12143.5	7161.11	10696.2	10389.4	7827.3	7498.46	6277.88	8086.97	8737.16	6853.88	9441.54	8927.66	5000.14	7859.08	9926.63	8185.48	6282.89	6787.26	11771.3	8186.88	8829.65	5975.85	9014.58	13018.5	7088.4	7676.13	4627.24	5610.3	6502.07	8589.7	9932.08
A0A0D9R0B8	A0A0D9R0B8	A0A0D9R0B8_CHLSB	KRT83		3311.3	2910.8	6974.83	2200.86	3973.52	3766.35	2742.88	888.501	3110.54	1253.53	695.862	1157.21	1921.44	2089.98	1693.87	3116.55	4575.52	6189.77	4013.98	2160.31	4838.48	2854.98	2077.81	2905.79	1938.7	1663.83	2165.48	1594.45	1548.39	1871.2	2469.82	4285.25	6292.95	3683.69	2590.65	4297.28	2709.78	1292.6	2383.7	1695.02	1592.13	1980.19	1006.77	1908.29	1162.74
A0A0D9R0B8;A0A0D9R0D4;A0A0D9R0G6	A0A0D9R0B8;A0A0D9R0D4;A0A0D9R0G6	A0A0D9R0B8_CHLSB;A0A0D9R0D4_CHLSB;A0A0D9R0G6_CHLSB	KRT81;KRT83				10738.7	6649.63	11397.2	13434				16005.2						10775.1	7252.14	19710.9	11491.3		19536.4	11888.1	10368.8	12526	13066.9		18014.8	8034.45			14428.6		24208.8	13534.2	6723.07	22072.1	11460.1		16632.6				15722.1
A0A0D9R0C0	A0A0D9R0C0	A0A0D9R0C0_CHLSB	D2HGDH		8853.37						6871.53		7106.13	6898.47			5124.69	4809.92	6192.38	8584.03	7452.41	8418.5	7238.54		6950.45	4560.4		4066.53	7859.09		9841.54			5852.67	4791.15		7466.84			6067.06		6373.2	8375.85	7437.7	7253.71	8427.32	8030.59	3300.49	6341.98
A0A0D9R0C3	A0A0D9R0C3	A0A0D9R0C3_CHLSB	DTYMK		17982.8	18848.8	15324.1	17721.9	16738.1	16712.1	14491.1	19613.8	14994.1	14670.9	19899.4	17221.8	16496	18339.7	16498.9	17424.9	16499.4	15550.8	17824.8	15649.9	14629.5	17254.2	16982.1	17263.9	15572.9	14724	13752.4	16660	17291.3	14205.5	18546.8	17130.6	14549.7	15660.5	18458.5	16166.2	17329.3	15729.2	13071.8	13420.5	11445	10458.3	15689.9	16477.8	13505.8
A0A0D9R0C4	A0A0D9R0C4	A0A0D9R0C4_CHLSB	ATG4B		21961.5	19869.7	24534.5	21830	20006.7	23288.7	20467.4	19252.3	19073	20982.2	17706.8	18965.7	18062.5	20415.5	19883.7	22006.8	20801.3	21713.8	21636.6	18484.1	20676	22036	20731.7	19411.7	17866	20192.5	18665.1	17101.3	21917.8	21001.5	24645	21024	20657.1	21643	18804.2	23724.3	19065.1	16747.4	18008.8	19576.2	14367.9	20933.2	16488.4	19292.2	18072.3
A0A0D9R0C7	A0A0D9R0C7	A0A0D9R0C7_CHLSB	EPS15L1		14253.7	12180.8	13031.8	12460.3	12522.5	12812.3	13054.1	13284.6	15077.2	14625.3	13539.1	13094.1	13597.6	13635.5	12639.1	12457.2	12446.4	12167.6	11765.7	12120.7	14047	13410.2	13005.3	13731.2	14086.4	15248.5	13980.6	14601.8	13475.9	14749	13218.1	11371.8	13411.6	14614	12210.6	14012.5	14370.7	11695.1	15107.7	14248.3	10886	13327.8	14418.7	13145.4	15267.1
A0A0D9R0D0	A0A0D9R0D0	A0A0D9R0D0_CHLSB	SUPT4H1		3362.19	8482.61	6937.54	8982.73	6399.91	5230.51	7502.4	7580.8	6065.61	6099.3	4469.73	5044.7	5898	6362.28	4743.03	8044.39	4955.5	4953.26	5660.04	6379.54	6659.8	6979.85	5890.82	6245.73	6103.8	6705.67	4579.67	3422.57	6040.36	6323.86		7024.3	7389.56	4923.27	6128.24	6073.38	5735.13	5083.24	5248.59	5186.07		6144.14	5855.52	5570.51	5766.7
A0A0D9R0D2	A0A0D9R0D2	A0A0D9R0D2_CHLSB	STK25		8294.05	6474.39	6553.44	6662.97	6580.96	5715.21	9764.09		8293.91	9878.72	4642.45	5173.38	8278.22	3607.57	8494.68	9027.03	4826.57	8701.53	8621.67		9872.67	9030.32	6382.85	8141.2	10224.2	7570.44	8226.77	8911.35	7777.29	8659.13	10521.9	6304.89	7822.04	8520.68	4779.69	6039.25	9376.01	4189.88	8673.58	9445.59	5545.28	7484.1	11114.4	6587.56	9396.99
A0A0D9R0D2;A0A0D9RY58	A0A0D9R0D2;A0A0D9RY58	A0A0D9R0D2_CHLSB;A0A0D9RY58_CHLSB	STK24;STK25		11250.1	5841.84	5736.53		9455.87		9250.51	6148.05		8031.92		7154.77	6569.18	7472.53		11761.8	9875.29			8531.12									7888.8			6893.33				6583.55								10213.7
A0A0D9R0D4	A0A0D9R0D4	A0A0D9R0D4_CHLSB	KRT81		1424.97	1543.35	1295.15	926.144	1541.41	1444.56		893.226			1332.92						1266.33	1587.48	1625.23	2063.92			841.513							1293.44	1754.41	2041.83	1847.05	859.583	1136.84	1217.02		937.886
A0A0D9R0D4;A0A0D9R0G6	A0A0D9R0D4;A0A0D9R0G6	A0A0D9R0D4_CHLSB;A0A0D9R0G6_CHLSB	KRT81		6396.94	7041.75	9872.59	6764.72	12062.7	9466.42	4689.01	3833.86	4681.21	3800.38	2838.17	3385.69	3059.95	3692.63	5021.95	7070.61	10201.8	11493.8	7433.34	8602.08	9205.52	5851.17	5449.7	7251.56	4938.13	3504.43	3965.81	2297.88	4834.84	3410.52	4836.24	9718.37	12184.7	6556.62	10775.6	6492.93	6251.29	6692.17	5487.15	3679.22	7820.91	5045.61	5014.94	3948.32	4014.49
A0A0D9R0D8	A0A0D9R0D8	A0A0D9R0D8_CHLSB	AP1M1		32699.2	29682.5	34985.9	34623.9	34412.6	35231.3	34804.1	29922.3	31939.1	34088.3	32995.4	33803.4	37500.1	35224.6	34425.1	36436.4	32905.8	32995.2	31694.1	32129.5	30460.4	35406.4	35437.1	36566.3	32986.5	40295.3	34439.3	36390.3	36174.2	37413.2	34660.7	30058.9	33547.3	37124.3	34363.8	31061.6	36766.6	33721.2	30509.3	38270.6	26153.1	27198.9	24921.5	36592.6	34102
A0A0D9R0D8;A0A0D9R425	A0A0D9R0D8;A0A0D9R425	A0A0D9R0D8_CHLSB;A0A0D9R425_CHLSB	AP1M1;AP1M2		11406.7		5525.63			4626.7	5075.47		9097.37	15611.1		4713.21		2566.19	4446.51	7546.39	4399.48	5768.91	4481.18	8374.86	7012.41	3897.16		4234.93	6612.67	7112.5	11703.8		4172.53	5009.7	9741.78	8644.23	8364.66	4028.31	6185.03	12891.1		4845.25	14015	4062.35	15622.1	19523.7	9619.58		7588.48
A0A0D9R0E0	A0A0D9R0E0	A0A0D9R0E0_CHLSB	FAM32A		8579.44	8701.25	10206.4	8679.96	9879.12	9003.2	9549.98	8158.99								8966.42	8734.66	10336.7	10685.1	8534.69	10061.5	8728.88	9798.93	9408.58	14485.1						8506.05	7787.7	11818.4	10800.2	8467.27	11810.1	8507.54	6672.77	13442.6			21362.1	13207.1	5221.75
A0A0D9R0E2	A0A0D9R0E2	A0A0D9R0E2_CHLSB	SEPTIN2		201400	148589	199565	188626	185756	190320	167122	177796	184153	191521	216145	200948	183700	195337	188444	211501	184085	189192	192511	187361	196144	187464	192056	201721	189114	219375	203057	199638	189495	193791	189579	170134	177582	185453	196209	196780	178256	164003	181597	188439	152695	165600	221837	200908	200315
A0A0D9R0E6	A0A0D9R0E6	A0A0D9R0E6_CHLSB	SETD1A		6774.35	8734.66	7949.56	8476.93	8532.58	6967.05	7820.08	8110.48	6478.42	6941.68	9088.44	10380.6	8236.43	8782.64	8596.7	7849.79	7392.96	5568.05	8589.18	8833.83	7879.09	8212.72	9931.44	9021.63	6863.72	8398.15	6306.22	9834.11	10405.4	8771.37	8226.69	7515.73	7203.8	8863.39	9119.31	6333.83	8671.29	10022.9	6032.59	10305.1	10572.8	8251.27	8829.05	10059.9	9130.89
A0A0D9R0E9	A0A0D9R0E9	A0A0D9R0E9_CHLSB			43160.4	19970.3	29223.9	42502.7	26255.2	29308.2	40380.8	19686.8	37839.4	46698.7	33830.3	35462.8	34475	19678.6	35671.7	34132.1	23634.1	26463.3	30741.2	37003.2	37080	32802.2	23658.7	24464	44583	35666.5	52593	29889.7	24727.5	30164.9	28467	20010.3	27783.6	39933.9	24166.7	53747	20258.6	21036	44587.1	35234.6	28930.1	42474.5	45206.6	21050.5	26809.1
A0A0D9R0E9;A0A0D9RRC4	A0A0D9R0E9;A0A0D9RRC4	A0A0D9R0E9_CHLSB;A0A0D9RRC4_CHLSB			94979.6	40463	91405.1	92485.3	90693	96808.4	98554.4	48093.9	94166.2	92676.7	88951.3	77948.7	86536.1	78582.6	87968.1	90974.3	78844.9	95186.1	100177	66730.4	118770	107570	90291.1	99547.9	101665	102995	103842	103275	88848.3	99553.2	98528.9	73085.4	95280.6	115331	80921.7	100440	96136.3	65540.5	98952.4	100591	67016	79984.6	112611	83310.3	97994
A0A0D9R0F0	A0A0D9R0F0	A0A0D9R0F0_CHLSB	PSMC3		92558.7	103743	102242	100783	100698	97703.2	82115	108750	94781.5	85829.2	98614.9	97594	94187.1	97097	90698.3	109178	88989.2	100340	94189.3	100046	91258.9	90947.7	96903.3	98197.2	81662.4	103701	95102.6	89338.4	90837.3	93743	89988.4	90715.1	81408.8	80894.6	92153.4	83672.6	84000.3	88994.6	78176	84334	79644	80331.9	95601.2	89567.6	86089
A0A0D9R0F2	A0A0D9R0F2	A0A0D9R0F2_CHLSB	HDLBP		46875.8	39498.4	46201	47324.4	45283.1	47000.1	45466.6	40928.6	48059.6	48794.6	46723.6	44531.3	43731.4	40650.5	42706	48455	41026.2	46268.1	47600.8	41792	50147.8	46926	46069.6	48345.7	45118.2	46976	48756.5	45830.8	42946.6	45263.2	49668.5	41593.5	46903.7	49024.4	46350.3	50320.8	45225.4	42779.6	47712.2	45799.4	44468.1	43644.5	52838.3	41919.5	47113.3
A0A0D9R0F3	A0A0D9R0F3	A0A0D9R0F3_CHLSB	XRCC6		214918	174701	190697	191174	188894	198384	232605	166726	223221	216775	196077	187709	210494	200090	223835	202671	189190	214804	198606	185269	221005	224031	196017	204524	230485	197801	226503	215428	214166	219341	220891	214757	220901	218454	209269	226451	218488	198952	255077	225380	209849	219391	232586	201553	227315
A0A0D9R0F4	A0A0D9R0F4	A0A0D9R0F4_CHLSB	RAB8A		12803.6	14276.5	11726	10972.3	9693.96	10598	13010.1	10957.5	12356.5	10251.5	7122.42	9894.69	11114.2	14611.3	14803.5	9740.9	16898.1	17461.3	12122.7	10609	9501.51	9732.4	9793.84	9132.6	11417.7	9244.66	9205.24	9399.62	9431.87	9430.7	12160.7	15134.4	19472.8	10203.1	10542.5	9489.29	13863.4	16191.9	12263.9	10849.7	8690.64	12770.2	7605.74	9261.3	10895
A0A0D9R0F4;A0A0D9R716;A0A0D9R8L7;A0A0D9RIS4;A0A0D9RLX3;A0A0D9S5J3;A0A0D9RQK3	A0A0D9R0F4;A0A0D9R716;A0A0D9R8L7;A0A0D9RIS4;A0A0D9RLX3;A0A0D9S5J3;A0A0D9RQK3	A0A0D9R0F4_CHLSB;A0A0D9R716_CHLSB;A0A0D9R8L7_CHLSB;A0A0D9RIS4_CHLSB;A0A0D9RLX3_CHLSB;A0A0D9RQK3_CHLSB;A0A0D9S5J3_CHLSB	RAB10;RAB13;RAB15;RAB1B;RAB8A;RAB8B		19928.3		7704.85	13168.7	7013.81	9392.72	16035.9		97831.6	379508	7564.27		11330.6	14004.7	18702.9	27758.7	6415.92	35172.2	6217.49		35848.7	34632.4	7092.21	52853.5	77472.3	19212.1	123966	11476.9	11870	12808	23878.9		81079.7	14101	6478.38	107262	27703.3		201615	43029.2	261817	288683	26438.1	7097.71	70657.3
A0A0D9R0F4;A0A0D9RIS4	A0A0D9R0F4;A0A0D9RIS4	A0A0D9R0F4_CHLSB;A0A0D9RIS4_CHLSB	RAB8A;RAB8B		4194.48	8654.96	7186.22	5723.05	5065.57	6213.02	6406.6	8941.84	5285.28	4858.01		6437.52	5477.75	10430.2		6129.13	8389.98	9006.49	8001.22	8302.6	4866.54	5871.67	4983.36	5309.84	5016.91	6933.42	5248.81	8820.85	9958.48			9142.94	6644.83	9882.42				8045.49	3577.22	7250.41	4632.25	5429.41	5647	7982.46	8467.28
A0A0D9R0F6	A0A0D9R0F6	A0A0D9R0F6_CHLSB	CELF1		15230	13122.1	17133.8	15152	15506.2	15577.7	14862.7	12136.4	14979.9	16461.3	17923.3	15951.2	13882.2	13584.2	13528.3	16513.3	15612.8	16320.3	15623.2	14005	16309	14565.5	17701.5	14496.3	15000	18486.3	18649.7	16226	17805.8	13553.7	15640	14394.4	14397.3	13525.2	15490.9	13793.5	12960.9	14665.9	16198.6	15418.1	17622.7	17356.1	18356	17382.6	13520.7
A0A0D9R0F6;A0A0D9RLS7	A0A0D9R0F6;A0A0D9RLS7	A0A0D9R0F6_CHLSB;A0A0D9RLS7_CHLSB	CELF1;CELF2		5586.72	9675.32	6391.14	4261.82	7358.52		5032.78	10134.8	6282.37	6250.22	7458.3		4760.83	8896.91	5737.64	8255.47	10030.4	4552.16	13346.9	15125.4	4472.27	6509.34	7824.9	5454.67	6775.73	8048.68	10260.6	4480.98	5301.39		7294.94	14809.2	6996.99	5800.37	9210.88	5731.71	4671.56	7291.37	13901.9	5541.94	15042.3	14023.8	8011.14	6446.67	7574.9
A0A0D9R0F7	A0A0D9R0F7	A0A0D9R0F7_CHLSB			33251.8	110504	44464.8	42970.8	36954.7	36785.8	23167.6	56320.6	22144.1	25821.1	38476.6	48828.8	30927.4	41249.6	28747.1	29091.2	27887.4	22882.7	26077.2	26061	18424	17375.5	20839.5	19163.6	13143.8	21313.4	9730.2	14554.4	19278.6	16741.8	16597.9	19358.7	11326.5	16294.4	12559.6	8673.95	8966.64	11203.4	2584.72	14508.7	18802	10635	13775.9	15485.6	12461.4
A0A0D9R0F7;A0A0D9RDK6	A0A0D9R0F7;A0A0D9RDK6	A0A0D9R0F7_CHLSB;A0A0D9RDK6_CHLSB	TPM2		33479.6	31255.7	30079.1	34082.6	26489.2	25116.5	31375.2	37784	33110.9	23710.8	43991.9	41474.2	47821.5	39057	42705.7	28294	32624.6	26808	27953.7	32466.9	31981.8	26005.8	29517.6	26668.6	38808.2	25650	21356.2	37562.6	30276.3	34973.9	40844.1	30978.9	31290.1	29436.7	34614.7	30322.4	25948.2	37891.6	18322.7	38911.3	47595.6	46713.7	31907.4	46232.9	30031.4
A0A0D9R0F8	A0A0D9R0F8	A0A0D9R0F8_CHLSB	DESI1			904.182	1760.98	510.48	1513.51	1160.77	912.524	882.598	1706.04	818.53		1032.06	1359.96	1098.97	877.591	781.26	1117.56	1095.6	835.943	801.084	1623.6	845.816	1553.65	1292.98	773.688	1584.16		1117.22		1518.24	875.65		1329.66	858.406	766.752			860.881	1144.39	850.727		877.205		898.423
A0A0D9R0G0	A0A0D9R0G0	A0A0D9R0G0_CHLSB	PTPMT1		16479.2	2744.98	6804.61	5283.17	6713.89	7534.33	12584.1	4435.11	15853	10743.3	5731.96	2940.32	11034.8	7079.29	13298.5	10219	8428.96	16154.3	10063	6276.31	12790.1	8675.27	4785.43	7557.9	16783.3	7883.31	14113.6	11253.8	9543.83	14276.1	12051.4	5849.56	11638.8	7120.85	5679.47	13759.8	12849.1	8774.64	20795.2	8140.94	16589.2	17314	13453.7	9444.43	13528.4
A0A0D9R0G3	A0A0D9R0G3	A0A0D9R0G3_CHLSB	PMM1										3431.9												2583.44		4114.92	3780.41	3606.02											3237.03			2752.11			3797.66			3533.41
A0A0D9R0G8	A0A0D9R0G8	A0A0D9R0G8_CHLSB	POLR3H		2785.28	4064.83	3513.11	3422.17	3391.73	4146.45	2691.87	2469.15	2143.2	2480.55	1915.34	3261.87	2032.89	1675.6	2392.97	3170.4	4003.11	2764.19	4218.75	4296.56	3533.96	2319.12	2779.41	2172.92	2802.25	4162.1	3144.97	1760.16	2694.21	2611.9	2856.6	3231.84	2936.42	4107.06	3965.22		3519.98	3015.46	2092.33	3754.77			1269.72	2151.14	2585.66
A0A0D9R0G9;A0A0D9R968	A0A0D9R0G9;A0A0D9R968	A0A0D9R0G9_CHLSB;A0A0D9R968_CHLSB			7412.57	7757.45	8133.25	10325.8	8132.94	7473.33	6726.86	8680.45	7035.55	7437.55	8777.18	7958.4	6201.11	8109.31	7556.11	8091.37	9097.05	9071.02	6272.54	7748.1	7450.82	7469.09	7067.66	6345.92	7044.86	6183.63	7543.17	8122.12	6857.38	9180.68	8462.68	7872.15	7104.56	7831.48	7033.13	7376.96	7410.07	6712.23	6380.64	7120.31	4281.62	5601.47	6548.82	6376.07	6315.8
A0A0D9R0H2	A0A0D9R0H2	A0A0D9R0H2_CHLSB	NDUFS3		24860.8	16070	18415.1	18194.2	14983	18201.2	18755.3	12945.2	17813.2	17718.5	13741.7	15457.1	18772	13249.4	15663.6	21056.4	15960.5	19911.9	19419.5	15197.4	19843.8	18675.6	14396.7	15486.1	22111.2	19150.4	16815.7	19695.1	18070.4	19157.5	22192.1	17601.8	19822.5	21447.1	15532.1	18106.4	17944.4	12603.5	19474.6	19288.3	15882.2	18322.5	18971.7	15626.6	18062.2
A0A0D9R0H6	A0A0D9R0H6	A0A0D9R0H6_CHLSB	ACO2		145252	106310	126912	119855	123845	133817	124810	106086	139386	120222	100750	106318	133307	133681	135749	129781	123932	141071	137152	115909	140211	130098	107768	125304	129331	103773	109373	130490	124808	141820	144567	119529	150721	140758	126356	148351	126290	117484	131569	117596	104966	105732	131088	120687	142055
A0A0D9R0H7	A0A0D9R0H7	A0A0D9R0H7_CHLSB	R3HCC1L		5902.75	3052.82	4824.03	4188.61	5615.3	5374.59	5825.92	4920.91	5755.9	5691.73	5559.66	5049.78	4363.31	5525.9	5239.58	5419.33	2937.76	6340.02	4843.61	5402.83	5564.81	5234.13	6617.71	6499.57	5071.81	4755.51	4229.13	7127.54	5135.54	4177.45	4440.84	4449.86	4465.04	5023	4895.24	3431.49	5722.2	4658.25	4190.28	5784.55		3704.15	5319.28	4024.21	4318.07
A0A0D9R0H8	A0A0D9R0H8	A0A0D9R0H8_CHLSB	CTF1			1173.77																	1565.8																		903.572
A0A0D9R0I0	A0A0D9R0I0	A0A0D9R0I0_CHLSB	KRT80		2366.3	2434.82	1402.24	1986.78	2199.83	1403.93	2188.09	2193.88	2051.61	1650.99		1591.49	1996.62	1850.99	2061.11	2330.98	1796.88	3242.72	3280.98	1402.96	2848.51	1949.49	2361.08	1117.89	2615.44		3025.21	2222.33	2131.89	2001.48	3215.4	1990.21	2268.28	2794.2		2510.15	2358.55	2491.15	2656.18	2728.38		6946.98	3160.45	2972.76	3288.88
A0A0D9R0I1	A0A0D9R0I1	A0A0D9R0I1_CHLSB	PHF5A		74892.6	47158.8	54967.8	67685.5	62604.4	65861.2	66214.4	54612.7	65307.8	62329.7	59598.4	65571.8	48329.3	45882.2	46023	68476.5	46445.3	54241.5	70102	53748.1	65438.1	72110.6	65810.7	63440	57012.4	60759.9	58150.2	63470	55568	51240.1	69885.2	50844.6	57599.6	66197.5	57374.6	63208.2	71123.6	56799.7	52139.9	64484.2	41114.4	54853.8	65828.9	48521.3	55111.4
A0A0D9R0I2	A0A0D9R0I2	A0A0D9R0I2_CHLSB	RAD51C		7091.21	6634.59	5763.44	6170.14	5333.01	6417.9	4648.37	7331.39	4222.08	4031.86	4866.25	5797.7	4761.94	4860.58	4559.26	6454.72	6360.94	5444.15	6190.21	6740.64	6364.29	5375.11	6432.43	4643.33	3829.53	5077.21	4065.38	4281.12	3956.08	3606.65	4858.57	6860.13	6157.97	5063.11	7991.46	5316.62	6184.09	4690.44	5025.25	4876.14	2279.35	3061.95	2620.61	4901.27	4704.15
A0A0D9R0I6	A0A0D9R0I6	A0A0D9R0I6_CHLSB	FNBP4		2319.23	1514.1	1896.86	2737.62	2125.49	1517.02	2122.73	1885.23	2539.09	1796.83	2227.07	2140.28	2026.22	1849.97	1953.35	2048.04	1730.95	1863.95	2008.34	1296.74	1599.35	1679.76	1939.49	1899.08	2173.85	1923.08	1857.44	1775.32	2350.36	1853.35	2006.74	1215.03	1854.09	2292.19	1801.56	1386.98	2039.14	1385.68	2463.1	2415.63		2448.95	1778.8	2324.86	1832.34
A0A0D9R0I7	A0A0D9R0I7	A0A0D9R0I7_CHLSB	BCL7C							613.796	552.789		1448.74	1082.37			834.144	1016.2	769.615	775.892	792.502		932.597	1027.84	1123.94		1213.94	778.577	1220.32		2787.11	1007.21	774.999	877.279				949.522		2392.3	588.031	992.742	851.746				2410.14	694.56	1282.36
A0A0D9R0J1	A0A0D9R0J1	A0A0D9R0J1_CHLSB	ZC3H7B		7686.71	5970.53	7062.42	6313.08	5759.63	6194.8	7788.23	5173.03	6197.5	6747.01	5620.31	6036.67	6658.45	5573.85	6861.75	6670.32	5056.53	7079.57	6217.29		6879.77	5684.62	4394.42	5303.39	7403.45	4847.23	6491.96	6022.64	5306.33	5927	8026.21		7283.47	6990.2	5545.82	5579.67	6717.45	4825.99	6340.81	5946.84	5322.98	6940.47	7934.03	5301.13	6654.85
A0A0D9R0J1;A0A0D9R7D0	A0A0D9R0J1;A0A0D9R7D0	A0A0D9R0J1_CHLSB;A0A0D9R7D0_CHLSB	ZC3H7A;ZC3H7B		5360.28	5224.34	7448.44	5918.51	5023.92	5904.07	5159.48	3748.19	4351.66	3543.72	4499.08	3639.27	4316.4	4522.04	6074.23				5721.64	2993.53	5889.34	5480.05	3158.53	4042.99	3792.45	7773.75	5532.82		5552.55	3827.93	4750.63		7196.51	4002.92	4508.48	5213.15	3083.88	2557.15		4413.06	33504.5		5185.95	3940.63	3462.96
A0A0D9R0J2	A0A0D9R0J2	A0A0D9R0J2_CHLSB	ZNF629		5034	8142.78	6506.44	7399.9	6543.72	5692.29	4313.34	7149.43	4964.56	5122.4	7598.54	7211.71	6492.68	5257.34	5915.93	5738.93	6878.7	5442.12	6802.76	8216.6	5614.18	6136.11	5999.5	6116.42	5827.04	5825.9	4325.64	6130.97	6657.74	5871.4	5841.15	9347.14	4970.43	5686.97	6345.9	6033.38	6750.95	8291.84	4466.49	5689.06	5103.87	3563.91	6116.71	7011.1	5611.03
A0A0D9R0J3	A0A0D9R0J3	A0A0D9R0J3_CHLSB	ZFYVE27		3139.63	2133.06	4578.76	5116.6	4605.55	4759.98	7357.6	3399.59	9617.28	13299.2	3862.49	5213.13	10537.2	13892	12459.9	3640.88	6681.44	3917.97	3262.17	3462.25	5305.46	4805.69	6526.45	5717.74	10002.9	6311.31	7476.1	11075.5	10053.6	9495.67		3919.68	4225.22	3595.4		4969.8	5595.39	7373.47	8555.98	8764.29	7205.47	12162.2	7071.67	7695.66	10793.5
A0A0D9R0J6	A0A0D9R0J6	A0A0D9R0J6_CHLSB	ATG101						2398.42		2151.05					1587.31	2004.3						538.965				2040.72	2246.35	2081.72	1955.6			2068.05							1988.22		1910
A0A0D9R0J7	A0A0D9R0J7	A0A0D9R0J7_CHLSB	RANGAP1		43615.7	34858.7	38900.4	43111.3	38391.1	41916.1	41476.2	38535	42898.1	46592.6	42797.9	43149.9	43658.4	39882.1	44101.4	40812.4	36097.2	38916	43223.9	37403.8	42478.5	44677.4	41882.5	43521.8	44536.7	44606	45690.3	47176.5	44576.6	47539.8	43963.2	31779.6	38802	44112.3	40131.9	43335.9	46132.8	41409.3	43388	48372.1	38311.4	43116.7	43109.3	44515.3	46942.6
A0A0D9R0J8	A0A0D9R0J8	A0A0D9R0J8_CHLSB	RNF40		6989.46	7763	8586.32	8394.85	7378.41	6456.91	7516.32	6858.38	7584.3	8110.82	7013.23	7909.67	7017.75	6456.18	7550.82	9956.54	8248.77	6955.54	8345.21	11113.6	7963.8	7682.6	7707.84	8468.71	7893.11	9194.49	7888.89	8234.15	7171.64	7965.16	9035.91	9164.88	7708.4	7451.75	7896.58	10113.9	8221.64	5931.13	7527.39	8417.82	10348.8	9522.74	9938.38	8041.03	9734.88
A0A0D9R0J9	A0A0D9R0J9	A0A0D9R0J9_CHLSB	CHADL		3833.03	20934.3	14354.9	12328.9	11648.4	8458.33	4711.8	20922.8	2161.23	2909.42	13386.5	14083.6	10257.8	13337.9	9340	7001.35	14312.8	4871.31	12757.2	20529.5	7311.32	7370.65	9419.73	7061.85	5948.29	8320.23		6714.8	11425.5	7640.98	9234.12	13663.3	4462.47	15421.8	15722.2		10337.1	16766.8		9079.06			1964.88	12939.9	5159.13
A0A0D9R0K6	A0A0D9R0K6	A0A0D9R0K6_CHLSB	SKA2		2356.43	3629.51		1757.03	3670.32	3475.92	1909.09	2373.44	1688.86	1507.86		1734.11		1352.07			2154.85	2413.06	3646.82	3292.56	2531	1397.17	1832.07	2781.6	1842.01	1559.11	1175.67	1494.93		2025.52	2230.07	3204.76	1918.48	2367.56		1923.25	1972.78	1561.42		1898.79		2540.62		2280.71
A0A0D9R0K9	A0A0D9R0K9	A0A0D9R0K9_CHLSB			24359.6	21291.4	25020.2	21346.4	23519.3	22458	22130.6	23407.5	28915.5	27218.7	21639.4	21627.2	26682.8	19135.2	21883.9	21032.5	17946.3	21005.2	17715.3	17592.3	23688.2	20926.9	20164.8	21596.1	22357.4	18850.4	27071.3	25364.1	17482.4	25085.5	21696.2	15952.9	23932.8	16974.8	17259.5	25205.5	18825.4	17316.1	24925.4	20960.9	28755.1	27597.8	22395.8	19977.4	22527.5
A0A0D9R0L0	A0A0D9R0L0	A0A0D9R0L0_CHLSB	PHKG2		10045.2	10145.1	12405.1	14028.6	12669.5	12477.6	12998.7	8637.16	8019.96	7414.28	12325.7	10741.6	11310.6	11501.9	11157.9	9420.18	12355.8	12066	13930.7	10655.4	11949.9	13658.4	10785.2	10794.6	10542.8	11612.3	7691.93	12124.5	13532.1	10808.8	13104.8	9561.9	9668.51	13153.4	12199.1	8201.73	12081	11177.9	8664.23	11673.2	5779.65	5236.02	8538.73	11708.6	9593.75
A0A0D9R0L1	A0A0D9R0L1	A0A0D9R0L1_CHLSB	PI4K2A		6889.37	9042.93	8166.21	6891.81	6390.16	7271.77	9245.36	6571.92	5215.25	6214.98	5540.33	6866.72	7829.78	8065.18	8194.16	7925.25	9571.99	8752.79	7949.04	7732.34	7237.2	6101.79	7221	7320.2	7329.83	6243.35	6442.74	6393	8315.34	9247.55	7594.34	8821.5	8176.52	8256.27	7224.35	6118.35	8170.35	8306.54	5938.6	8279.25	6398.36	6014.1	7875.13	7337.15	7876.75
A0A0D9R0L1;A0A0D9RVP7	A0A0D9R0L1;A0A0D9RVP7	A0A0D9R0L1_CHLSB;A0A0D9RVP7_CHLSB	PI4K2A;PI4K2B		12841		8199.27	7528.63	6755.86	13625.3	20526.1		8975.88	12759.1	3981.1	3713.81	9193	5719.38	10185.3	12997.3	7022.74	16316.5	17753.1	3242.15	14603.3	13231.7	6703.45	9426.58	28413.2	14282.5	12646.1	12753.5	10910.7	9411.87	16344.3	4734.77	18279.8	19023.2	4030.28	5252.12	21377.6	5146.59	9264.41	24401	23629.8	15984.1	9817.92	6095.84	10391.5
A0A0D9R0L2	A0A0D9R0L2	A0A0D9R0L2_CHLSB	PASK		2765.93	2331.41	2407.48	3500.38	1874.42	2317.56	2244.32	2013.4	2649.12	2424.64		1869.02	2072.37	1840.23	2094.91	2580.03	2070.58	2342.73	2672.17	1865.27	2582.44	2094.15	2354.71	2807.92	2383.99	2529.73	2438.78	2661.43	1672.97	2256.19	2121.85	1825.58	2537.79	1856.59	2489.95	3721.04	2708.62	1738.24	3647.54	2537.38		3394.16	2464.62	1785.45	2729.04
A0A0D9R0L3	A0A0D9R0L3	A0A0D9R0L3_CHLSB	NUP160		7814.89	8795.5	8081.46	8982.73	8507.76	8570.15	8357.26	8553.57	8768.7	8523.66	7426.83	8583.41	8283.16	9069.6	8514.75	7661.62	7551.21	7631.52	7284.22	6673.88	8184.58	8484.7	7701.44	8309.71	8366.77	7076.27	8158.17	9036.22	8528.4	9791.92	7979.79	7380.2	8110.42	8224.69	7289.34	6077.67	8023.7	8145.97	8060.88	8470.47	5388.89	7904.86	4623.55	9054.13	8638.17
A0A0D9R0L4	A0A0D9R0L4	A0A0D9R0L4_CHLSB	EP300		2611.14	2280.73	3007.31	2286.68	2202.11	2264.82	2084.19	2043.02	1863.18	1457.84	2065.27	1541.34	1919.84	1785.13	1636.92	2583.49	3047.22	2488.28	2202.87	2978.02	2222.22	2677.66	2650.48	2246.26	1672.77	2152.91	1831.65	1776.75	2325.14	1735.6	2045.77	1247.14	2172.98	2334.3	2190.3	2062.22	1717.63	2568.47	1704.73	2241.22		1088.17	2277.39	2148.72	1862.51
A0A0D9R0L4;A0A0D9RBB2	A0A0D9R0L4;A0A0D9RBB2	A0A0D9R0L4_CHLSB;A0A0D9RBB2_CHLSB	CREBBP;EP300		5689.23	6063.5	5141.38	6375.88	5949.7	5634.46	5852.88	5712.67	5732.8	4797.4	7022.01	5592.49	4086.35	4051.89	4609.73	5068.36	4751.92	4924.91	6293.5	7331.93	5275.49	6257.61	6579.4	5443.73	5138.23	5722.17	4782.41	4466.2	5483.3	4929.91	5882.58	5482.19	5171.19	5352.9	5667.51	5900.52	6483.87	6438.06	4852.87	6109.9	1989.85	4491.58	5683.83	5327.85	5362.54
A0A0D9R0L6	A0A0D9R0L6	A0A0D9R0L6_CHLSB	MTERF4		18548.6	13736.2	13687.8	17056.2	17651.3	19211.1	13935.8	13781.8	14543.5	13571.4	16249.3	16386.5	13795	13536.3	18763	15901.6	19545.2	15997.2	17559.7	17251.8	17284.6	16984.7	16128.2	20256.3	14969.2	12742.3	15112.7	14064.8	17018.6	15763.3	16330.6	15100.6	13648.7	20072.5	19203.5	14472.5	15963.7	17904.1	14154	20552		12249.8	15069.3	19547.9	16190.8
A0A0D9R0L8	A0A0D9R0L8	A0A0D9R0L8_CHLSB	RBX1		23703	10668.1	24151.8	16250.2	14542.9	18107.1	17462.9	11959.9	21978.1	20002.2	16857.3	14607.6	13756.1	19978	16527.2	22133.6	29099.8	19662.2	20643.8	13673.4	16876	17739	25371.1	22356.5	17435.2	24439.2	29313.9	17900.1	23167.6	18839.4	18383.8	28498.7	20688.1	17342.6	22294.8	25146.1	16281.6	11901.6	24022.1	18085.5	21622.2	22965.4	22730.7	21943.4	18915.2
A0A0D9R0L9	A0A0D9R0L9	A0A0D9R0L9_CHLSB	HOGA1		9115.91	7498.97	6285.58	7682.48	5807.91	5696.17	5421.42	6057.27	7421.04	6027.2	6191.02	6188.16	7431.28	7144.77	5713.47	7747.24	5527.75	7310.18	7308.52	7567.71	6592.08	5026	4836.96	5879.63	5552.08	7305.73	6985.57	6562.12	7424.16	7733.69	8329.69	7208.65	8274.3	7479.93	8014.79	8038.76	6343.59	7756.66	6383.13	6089.52	7364.9	5371.34	6075.12	7793.91	8110.57
A0A0D9R0M0	A0A0D9R0M0	A0A0D9R0M0_CHLSB	XPNPEP3		6872.24	5881.4	6619.15	6180.71	6187.04	5963.87	5426.19	6768.16	7117.78	5566.26	6195.39	5638.73	6070.69	5961.97	5783.19	5388.67	5797.65	5372.44	6504.19	6061.54	5975.69	6674	6091.29	6080.02	6562.3	5542.92	5983.67	6096.31	6376.34	7341.1	5324.2	6487.33	4801.55	6790.67	6538.56	6412.74	5717.87	6372.52	6165.14	5777.67	4984.65	6085.71	5724.64	6168.47	7147.4
A0A0D9R0M3	A0A0D9R0M3	A0A0D9R0M3_CHLSB	SMG8		6910.46	6283.61	6708.22	7248.99	6856.98	7374.06	7236.91	6594.65	7337.48	6304.34	6228.15	6111.91	6258.39	5838.45	7782.68	7947.07	7800.46	8126.6	9461.49	7655.85	7370.15	7041.56	6722	7206.51	5864.97	7193.41	6817.52	5494.49	6637.63	6495.35	6323.36	7692.67	7761.36	8931.63	7557.55	6004.18	7189.69	7474.99	4949.93	7406.44	5040.93	4501.04	7707.86	7171.25	7342.74
A0A0D9R0M4	A0A0D9R0M4	A0A0D9R0M4_CHLSB	GDPD1		3340.29	5579.58	4036.81	3325.3	4893.16	3976.91	4509.43	3155.72	3368.98	3598.8	4149.1	3375.4	6382.24	7011.42	7415.1	4436.12	7875.06	7546.6	4916.77	4333.91	3496.08	3939.11	3678.24	4062.63	4387.09	3963.59	3718.43	3610.92	4506.81	4218.99	3872.83	6098.98	7009.27	3670.64	2907.04	2895.47	7493.95	7585.61	3385.26	4241.78	2313.73	2959.64	3478.18	5185.75	6140.36
A0A0D9R0M5	A0A0D9R0M5	A0A0D9R0M5_CHLSB	SRCAP		4827.54		1019.38	1501.52	1104.85	1627.82	4965.37		4505.38	3942.95		467.192	1630.03		2317.58			3006.33	1377.4		4279.19	3564.21		1815.96	4675.47	2209.74	4232.01	2598.59		2662.02	4253.92		3248.44	4469.58		3573.08	4280.33		4587.15	4629.24		2931.81	3860.06	1873.77	4314.55
A0A0D9R0M7	A0A0D9R0M7	A0A0D9R0M7_CHLSB	DHX40		6649.05	4988.4	4060.44	5182.39	6191.44	6643.33	5820.56	5477.45	6607.81	6637.98	3613.14	6164.48	3214.61	4597.89	3967.31	6347.2	6123.7	7446.32	6450.47	6430.97	5352.35	6674.62	5076.46	6333.73	7096.07	6671.93	7161.52	5130.96	5048.08	5615.96	6966.19	5853.08	7116.26	6667.5	7280.91	7107.14	8740.11	6396.59	8613.38	7608.95	16072.7	11201.8	9215.21	6431.4	9044.67
A0A0D9R0N1	A0A0D9R0N1	A0A0D9R0N1_CHLSB	MMS19		15266.9	13547	15104.3	17369.2	14978.5	15333.2	15982.4	12293.3	14211.8	14310.2	13044.6	15436.2	16646.5	16296.1	16696.8	14349.4	13514.7	13790.4	14500.9	13793.4	16040.5	15524.7	15531.5	15436.8	16574.7	14240.7	12977.8	16650.5	15647	16373.6	14910.3	12480.4	13252	15513.6	14700.2	11598.7	15167.1	14213.7	12338.4	17037.6	7632.68	11208.1	9269.56	15497.6	14724.5
A0A0D9R0N2	A0A0D9R0N2	A0A0D9R0N2_CHLSB	ROBO2		16423.9	17652.4	18017.5	17299.9	17943.1	13876	19361.7	16310.7	21180.1	16498.8	18235.1	15915	19483.1	23260.4	19391.5	26054.9	21769.3	24608.7	21823.2	18299.5	21978.6	18349	17517.3	18324.9	22071.3	23692.5	23561.9	20619.8	20538.4	19983.8	21878.6	17219.3	17217.5	15819.5	15514.3	15489.3	17766.5	19676.5	19897.9	16814	23300.3	15925.9	14571.5	19183	18248.9
A0A0D9R0N5	A0A0D9R0N5	A0A0D9R0N5_CHLSB	CLTC		764219	658798	750481	813523	842152	837311	887373	766475	912273	943633	782764	756567	811055	821041	886172	753635	727664	780945	759358	745141	837302	865563	777734	844332	923988	803977	918369	913511	888012	927227	803158	707379	873035	876364	788112	870861	876332	767729	875783	922386	776349	877037	653724	818841	902607
A0A0D9R0N5;A0A0D9RGI6	A0A0D9R0N5;A0A0D9RGI6	A0A0D9R0N5_CHLSB;A0A0D9RGI6_CHLSB	CLTC;CLTCL1		107456	82829.1	88859.5	99878.5	106992	115609	108807	92750.2	109950	113242	101776	99932.9	113447	111751	117740	104855	92450.7	101370	102368	93361.3	112155	104091	102523	109590	130926	113341	109888	108921	123760	111811	108916	88547.4	99776	118288	100590	110031	119647	110344	95374.2	119132	80958.3	88362.7	84130.7	107964	113498
A0A0D9R0N6	A0A0D9R0N6	A0A0D9R0N6_CHLSB	EXOSC1		20609.9	20272.8	23720.3	26136.3	24449	26442.1	26695.6	20172.5	25989.4	25117.4	18197.6	21264.4	24780.2	20352.7	25782.1	26537.4	21196.6	24925.8	27161.1	21974.9	27263.8	27540.7	23302.9	24070.9	25535.4	27705	23376.3	23519.7	24364.2	24356.2	27531.7	20419.1	27382.5	27714.4	21102.5	26672.3	24446.9	20033.6	22901.6	27317.1	20341.6	20355.9	30573.9	21716.6	27187.7
A0A0D9R0N7	A0A0D9R0N7	A0A0D9R0N7_CHLSB	PRR14		2855.17	3114.94	3182.25	3187.68	2387.87	4530.31	4582.37	2354.96	2992.54	2764.29	2352.61	3128.55	2715.07	1536.51	2299.58		4141.92		3573.29	4056.12	2545.55	4074.97	2757.06		3663.21	3650.9	5092.59	4145.23	3216.62	2255.92	2892.46	5350.5	4570.44	3581.63	3174.14	1778.86	3968.01	4932.91	3127.77	4008.75		4235.81	4262.37	3847.91	3644.65
A0A0D9R0N8	A0A0D9R0N8	A0A0D9R0N8_CHLSB	ST13		129056	83435.4	95398.3	102542	82580.8	101302	113757	103727	119359	118399	119947	110465	114910	102865	117920	117478	91725.2	102697	118367	107146	116853	124732	116260	120494	121036	126019	123360	134900	125043	122251	116291	102932	109583	113005	96735.6	114102	116289	113839	113290	131498	113373	127266	157020	119960	128769
A0A0D9R0P2	A0A0D9R0P2	A0A0D9R0P2_CHLSB	RRP12		14812.9	13543.7	12636.1	16101.9	15476.9	14194.7	16962.4	13861.2	15466.9	15256.2	13243.7	14763.9	16827.6	17076.8	17244.5	14159	16934.3	16969.7	14347.8	13857.1	15352.8	14522.9	13825.9	14220.7	16031.9	15204.7	15448.4	14788.7	14000.7	13173.4	16329.2	13762.1	17861.6	16458.7	14024.1	17215.5	15895.1	15791.4	14379.1	14239.8	16895.7	16545.6	12705.4	14268.2	15203.6
A0A0D9R0P6	A0A0D9R0P6	A0A0D9R0P6_CHLSB	ZNF768		1529.36	2079.38	2105.76	3213.39	2433.21	2448.26	2878.62	2392.86	1661.17	1933.63	4716.1	3150.18	2312.81	2091.15	1802.52	3467.42	2570.74	1859.36	4058.59	3441.47	2677.81	3662.81	2659.63	2014.79	3464.4	3563.33	2011.87	3122.61	3249.55	2492.01	3161.89	3764.39	2163.69	3435.1	2845.69	1591.96	4290.16	4623.06	2184.96	3902.22	1041.57		3175.08	3646.68	2158.23
A0A0D9R0P9	A0A0D9R0P9	A0A0D9R0P9_CHLSB	VMP1		5056.35	8436.67	6434.39	5453	6831.18	5484.78	11205.7	4018.03	6023.05	4369.83	3250.66	4275.89	9192.49	11502.5	10739.1	5261.1	15897.1	12978.2	5002.7	5159.73	4295.24	5604.09	3497.8	4782	8035.67	3895.18	4839.96	3693	3333.47	4451.29	7241.24	12140.3	12962.9	3794.76	4619.37	6928.86	10399	14488.9	7504.17	5610.95	4265.61	4451.04	2552.56	3826.39	6632.88
A0A0D9R0Q9	A0A0D9R0Q9	A0A0D9R0Q9_CHLSB	RPS6KB1		14953.4	11158.9	14591.2	13442.7	15606.4	13812.6	16623.5	12091.2	13683.3	12605.5	14385.3	14030.4	13599.3	13834.1	15690.1	18955.3	15112.4	14512.3	14794.7	11918.9	14172.1	14287	14946.5	13316.7	12119.1	16522.3	15236.5	16355.3	14099.6	13947.3	15693.6	11811	15363	12148.1	14070.2	12103	13831.5	12485.5	15115.6	14089.7	10944.9	9998.05	11177.7	15296.9	11930.9
A0A0D9R0Q9;A0A0D9R8B9	A0A0D9R0Q9;A0A0D9R8B9	A0A0D9R0Q9_CHLSB;A0A0D9R8B9_CHLSB	RPS6KB1;RPS6KB2																																	5187.64	4843.41			9495.08			6176.31		17431.5	21922.3
A0A0D9R0R0	A0A0D9R0R0	A0A0D9R0R0_CHLSB	SLC25A17		4094.79	2270.3	2279.43	1481.85	3763.63	4235.48	4838.14	2370.55	4008.26	3361.06		3448.33	4123.36	4314.58		2598.5	2994.43	3132.71	3649.95	3871.96	4012.79	2896.93	2959.49	3020.01	4825.74	2419.87	3580.63	2348.91	4761.43	3768.12		2919.79	4885.02	3231.64	2517.83	2910.53	3715.43	4974.06	2168.72	3822.56		4179.04	1783.31	3946.92	4529.46
A0A0D9R0S0	A0A0D9R0S0	A0A0D9R0S0_CHLSB	DAZAP2						759.289	559.976										658.977			511.171				480.957		365.961					213.377				675.885
A0A0D9R0S1	A0A0D9R0S1	A0A0D9R0S1_CHLSB	MED13		7441.18	6876.79	7929.31	7452.01	7579.15	8304.21	6847.21	6947.5	5323.05	5902.04	6079.3	7662.4	6755.84	6981.53	7121.16	8419.85	8327.78	7328.98	8168.77	7736.86	7242	7223.79	7837.03	7734.21	6581.27	7452.34	5543.15	7038.14	6895.84	7210.5	6699.37	7986.07	6199.91	7460.01	7280.64	6182.25	6806.06	6319.01	5631.08	6862.15	3544.64	5605.02	6584.87	7983.06	6697.63
A0A0D9R0S5	A0A0D9R0S5	A0A0D9R0S5_CHLSB	GBE1		36443.9	37476.3	40646.9	42756.7	41952.4	42738	39246	40717.1	40603.3	44225.5	40397.1	42194.3	42976.3	46048.8	43915.6	38219.5	38639.3	37327.9	41710.1	38358.8	40126.8	44471.4	43484.6	44903.9	43877.4	40861.5	38388.4	46089	49281.6	43432.7	35630.6	39666.5	36770	42131.7	40646.2	37085.2	46707	46249.6	38395.2	47024.7	34824	37453	30711	44201.8	40376.3
A0A0D9R0S6	A0A0D9R0S6	A0A0D9R0S6_CHLSB	TFCP2		18444.6	19086.9	18373.8	19516.8	16318.2	18791.2	19182.4	23084.8	19284.2	17559	17713.3	17264.7	20081.8	17242.2	17303.9	20673.3	14157.4	17435.4	17904.2	16532.2	18261.1	19434.6	17810.2	19484	17301.3	16978.4	21127.5	18953	18889	19595.2	17983.5	16305.1	16109.3	18321.2	16034.7	17349.7	16994.6	16363.3	18320.6	17474.3	12833.6	13003.8	16708.6	20124.4	18767.7
A0A0D9R0S6;A0A0D9RAK4	A0A0D9R0S6;A0A0D9RAK4	A0A0D9R0S6_CHLSB;A0A0D9RAK4_CHLSB	TFCP2;UBP1		19630	11064.9	11074.4	18567.7	21381.8	17984.6	18477.3	9604.74	13029.5	13644.8	19776.9	19267.4	14913.4	12318.7	18547.6	12743	17519.3	12079.6	18556	11635.1	17978.8	21783.7	22303.8	19832.8	17793.3	19440.5	15465.1	18121.7	20379.5	12771.7	17603.7	14831.2	15707	13388.2	20383.8	11741.7	17374.4	15991.2	14238	15111.1	7504.38	10159.6	12386.6	19093	15336.5
A0A0D9R0S9	A0A0D9R0S9	A0A0D9R0S9_CHLSB	INTS2		3966.08	3847.99	3085.1	3261.2	4540.93	3574.13	3793.29	4523.9	4374.21	3202.05	3601.29	3083.75	3543.56	4250.3	3454.49	4531.7	4538.67	5285.82	3518.02	4106.82	3972.58	3615.45	4284.92	4144.91	4107.84	4599.83	4238.27	2939.68	4065.99	3262.79	3795.79	4283.76	3718.71	3741.22	4932.2	2939.38	3288.98	4781.84	3465.86	3050.78	3721.79	3428.75	3718.53	4788.19	3421.74
A0A0D9R0T4	A0A0D9R0T4	A0A0D9R0T4_CHLSB	BRIP1		1257.33	820.809	1086.1	869.557	1576.32	1102.6	1038.26	996.111	1040.68	917.05			634.002	916.466		720.927	863.2	744.099	1187.58	939.49	1323.82	952.689	817.85	1186.59	812.4			933.602		984.996	976.057	1233.7		1289.59		993.421	922.183	1113.95	1064.78	986.388		454.156		1226.44
A0A0D9R0U2	A0A0D9R0U2	A0A0D9R0U2_CHLSB	CHMP2B		8607.23	9070.21	7855.47	9678.06	7811.14	8957.04	8239.12	8079.91	8272.51	6070.78	9390.34	8282.81	7818.73	6234.84	7453.91	8076.84	8487.56	7413.02	9252.24	10309.8	7800.5	8455.15	7625.4	8672.93	6898.1	7913.24	7098.8	8066.43	8060.36	5915.12	9841.18	10294.9	6511.28	9496.52	7499.36	7589.48	7337.82	7974.57	7087.62	7290.42	3843.26	5607.09	8617.85	8036.61	7212.88
A0A0D9R0U8	A0A0D9R0U8	A0A0D9R0U8_CHLSB	C3orf38		5443.53	3525.45		5955.79	5497.66		5204.77	4450.03	4826.5	4393.36		5304.96	5256.56	5197.29	4965.9	5817.33	4374.92	5773.35	6564.09	5133.95	6007.55	6186.34	5345.48	5973.89	5855.93	7138.81	4976.09		6728.27			5366.66	4800.85	5513.15	6114.2		5362.03	6211.18	3366.29	5968.72		3834	5836.88	6908.26	6345.49
A0A0D9R0V0	A0A0D9R0V0	A0A0D9R0V0_CHLSB	TNKS1BP1		22588.1	16413.2	20642.7	19107.7	21550.9	20129.5	22063.3	18133.8	22966.5	22048.6	22124.3	21139.6	21341.5	20710.1	21743	22435	20082.8	22577.5	22857.3	17149.4	22702.4	22839.4	22125.6	23876.4	22409.8	25097.1	23857.2	22039.4	22062.1	22919.1	20820.7	17497.7	22172.4	21723	18951.2	23299	22074.9	18957	21867	22245.8	17657.8	18971.5	26853.7	20915.7	24690.6
A0A0D9R0V1	A0A0D9R0V1	A0A0D9R0V1_CHLSB	KIF1A		15089.5	11561.9	14301.5	15353.5	14129.2	14781	14411.3	12708.8	13263.8	13556.8	13409.9	12295.9	12903.5	11770.8	12805.8	14954.5	13124.9	13707.3	15214.2	11674.9	13676.6	13722.8	13470.1	12196.9	13820.2	13237.9	12463.6	12231.2	12752	12853.4	14355.3	12934.3	15250.3	13414	12406.9	12277.3	13728.5	10854.8	12277.9	12371	14594.9	15923.1	12648.2	10056.7	11112.7
A0A0D9R0V1;A0A0D9S8P0	A0A0D9R0V1;A0A0D9S8P0	A0A0D9R0V1_CHLSB;A0A0D9S8P0_CHLSB	KIF1A;KIF1B		18686.9	16018.9	12206.2	16345.5	13610.5	14477.2	16052	13942.3	16581.2	18059.8	12462.2	11293	14751.4	11352.3	13413.3	15498.7	12248.3	13982.8	15984.9	13105	16355.9	13374.6	11897.3	12349.3	17025.5	12848.7	17564.2	14080.4	11189.7	12687.3	15264.1	13134.6	15494.6	14364.8	11832.1	16472.3	15543.9	11996.1	15983.3	15026.5	11369.6	16893	13272.2	11728.4	13599.6
A0A0D9R0V6	A0A0D9R0V6	A0A0D9R0V6_CHLSB	PROS1		4605.83		3283.53	2186.51					2478.38							5028.8	3359.5	6995.85	2423.14		3732.67						2926.06				9518.77		7573.43	2985.96					2328.89		34352	16039.9			3140.58
A0A0D9R0V8	A0A0D9R0V8	A0A0D9R0V8_CHLSB					5632.35	5868.65	6739.25	6380.77			4670.05	4551.73		6678.91		6054.97	4755.16	3071.09	6666.78						5914.51		5595.89	5767.14				4053.1	5908.11	6062.11	3863.59	6014.98	6916.59		4227.96		4455.56	3562.13		4694.16	5793.37
A0A0D9R0V8;A0A0D9RWJ9	A0A0D9R0V8;A0A0D9RWJ9	A0A0D9R0V8_CHLSB;A0A0D9RWJ9_CHLSB			749.687		1003.13		1141.78	716.658	682.701	642.482	575.574	480.728	548.632	800.289	622.752	882.153	715.512	829.158	1621.5	553.372	444.052	456.471	566.307	600.764	1109.45	464.299	685.556	694.316	679.568	1240.25	926.831	594.971	202.189	382.298	482.876	687.104		816.398	832.69	526.837	655.984	722.366			1160.83	662.604	882.316
A0A0D9R0W0	A0A0D9R0W0	A0A0D9R0W0_CHLSB	SSRP1		58441.9	61707.9	64463.2	68957.1	60369.9	65240.8	62425	61843.9	67651.7	65060.8	75885.6	75858.1	63759	60401.7	55754.2	60907.4	56957.4	54273.2	66635.5	64814	61213.6	67524.7	65354.3	62816	68616	72313.3	68852	78131.3	74883.2	68625.7	66361.9	56111.1	54315.4	64480.3	63274.8	62250	67635	66104.5	63355	66796.4	51012.3	69350.1	38940.4	62530.1	60616.2
A0A0D9R0W8	A0A0D9R0W8	A0A0D9R0W8_CHLSB	METTL7A		3524.03	4998.71	4646.17	4388.54	5247.22	4542.97	7513.09	4016.78	4417.31	6114.22	3594.1	3567.23	7006.76	7367.16	7026.33	3998.06	6197.56	7062.51	4731.5	4163.7	4554.38	5082.86	3845.26	5469.94	6608.12		4193.16	4558.6	4749.04	4953.41	5885.42	4731.17	7347.9	5389.49	5959.48	3500.81	7082.48	7537.24	4069.96	5515.2	5485.58	5211.93	4143.19	5292.27	6130.7
A0A0D9R0X1	A0A0D9R0X1	A0A0D9R0X1_CHLSB	DIP2B		5093.98	4927.14	6375.58	5245.73	5324.65	5492.85	5219.54	5802.69	5453.64	4824.47	3860.17	5688.15	5737.99	5233.73	5643.08	5390.77	6308.84	5970.05	6305.02	5380.96	5821.42	5827.88	5623.63	5842.46	4735.76	5323.8	5784.84	4934.49	5092.27	4890.57	5170.61	5264.49	5990.19	5684.6	5285.03	5483.11	5142.2	5176.95	5789.26	4847.09	4054.29	4679.53	4445.83	5342.83	4912.44
A0A0D9R0X1;A0A0D9R426	A0A0D9R0X1;A0A0D9R426	A0A0D9R0X1_CHLSB;A0A0D9R426_CHLSB	DIP2A;DIP2B						1753.17	2668.78	2828.25						2597.21		2532.92	3897.75					2966.57			4575.75	7590.42	4744.43	7725.01									10691.6			6326.72	7646.96				1966.39
A0A0D9R0X9	A0A0D9R0X9	A0A0D9R0X9_CHLSB	ARL6		4939.12	3620.29	4745.33	4704.87	4045.34	4007.45	5740.92	4335.52	5295.18	5537.77	3835.71	3911.7	3621.05	3565.86	4599.2	3906.75	2709.94	3651.53	3828.89	3110.41	3879.88	5473.15	5045.35	4484.61	5244.19	5700.05	4045.47	4645.29	4500.54	5963.15	4228.54	3449.45	3664.82	5244.83	3508.7	2205.98	4947.43	4757.93	2982.96	5073.48	3475.2	2613.94	4330.62	4758.47	4211.21
A0A0D9R0Y0	A0A0D9R0Y0	A0A0D9R0Y0_CHLSB	LARP4		29056.1	27260	29358.8	26261.8	28333.9	28178.8	22918.6	25008.1	21899.5	18846.2	23502.3	21163.8	19457.9	21766.3	24168.8	29903.7	27825.1	31052.3	27567.5	24829.7	26874.5	24885.1	25464.6	23477.2	23162.4	29412.7	22219.3	22719.5	26348.8	26079.3	30764.9	21285.9	27092	29079	28389.5	20943.3	25796	22994.4	20720.6	22660.2	18028.5	21100.7	24438.7	21053.1	20400.5
A0A0D9R0Y1	A0A0D9R0Y1	A0A0D9R0Y1_CHLSB	MRTFA		1905.09	2128.93	2778.87	2943.11	3280.94	1851.46	2234.73	3402.39	2492.83	1505.12	4020.34	3288.24	1554.23	1976.04	2251.95	3650.4	3250.27	2528.16	2563.77	3576.24	1711.21	2989.75	2836.31	3391.86	1476.51	2084.46	1614.75	2891.53	3010	2048.47	3048.75	2545.79	2538.25	2865.7	3063	1445.25	2472.3	3025.1	1694.94	2202.03			2749.74	3322.57	3131.57
A0A0D9R0Y5	A0A0D9R0Y5	A0A0D9R0Y5_CHLSB	GPC1		5788.77	4667.42	5368.3	5805.6	5367.34	5966.97	6418.32	3487.58	5558.9	5150.14	4322.82	4507.92	5476.81	4969.02	5212.01	6215.12	6958.33	6915.36	5824.17	4427.89	6087.88	6032.82	4598.11	5712.17	5955.14	5015.47	4394.34	5108.97	4755.1	6341.14	6178.13	4348.25	5439.45	6026.17	5466.11	5031.97	6934.89	4897.52	5002.4	5681.64	4236.02	2319.15			6169.98
A0A0D9R0Y6	A0A0D9R0Y6	A0A0D9R0Y6_CHLSB	CRYBG3		8429.49	2405.63	7785.11	10255.1	7064.63	6653.34	8675.65	2138.71	9061.53	7407.65	10321.7	7709.26	5681.45	5970.09	5494.28	8366.09		8750.45	7945.92	11040	7132.86	5676.74	6916.89	8529.45	8091.63	8382.32	6255.31	6238.62	5334.93	8033.04	7381.85		6746.35	6928.87	6248.17	5354.15	5689.72		7017.46	6836.52	11194.1	8873.94	6868.4	5501.03	8900.44
[truncated: 6,912 more rows]
[truncated: 33 more columns]

## Sheet: 312 proteins from 2 A
Protein,Names	Genes	Genes	First,Protein,Description	Beta_1hpi_R1	Beta_1hpi_R2	Beta_1hpi_R3	Beta_8hpi_R1	Beta_8hpi_R2	Beta_8hpi_R3	Beta_16hpi_R1	Beta_16hpi_R2	Beta_16hpi_R3	Beta_36hpi_R1	Beta_36hpi_R2	Beta_36hpi_R3	Alphpia_1hpi_R1	Alphpia_1hpi_R2	Alphpia_1hpi_R3	Alphpia_8hpi_R1	Alphpia_8hpi_R2	Alphpia_8hpi_R3	Alphpia_16hpi_R1	Alphpia_16hpi_R2	Alphpia_16hpi_R3	Alphpia_36hpi_R1	Alphpia_36hpi_R2	Alphpia_36hpi_R3	Delta_1hpi_R1	Delta_1hpi_R2	Delta_1hpi_R3	Delta_8hpi_R1	Delta_8hpi_R2	Delta_8hpi_R3	Delta_16hpi_R1	Delta_16hpi_R2	Delta_16hpi_R3	Delta_36hpi_R1	Delta_36hpi_R2	Delta_36hpi_R3	Omicron BA.1_1hpi_R1	Omicron BA.1_1hpi_R2	Omicron BA.1_1hpi_R3	Omicron BA.1_8hpi_R1	Omicron BA.1_8hpi_R2	Omicron BA.1_8hpi_R3	Omicron BA.1_16hpi_R1	Omicron BA.1_16hpi_R2	Omicron BA.1_16hpi_R3	Omicron BA.1_36hpi_R1
[truncated: 281 more rows]
[truncated: 14 more columns]

[truncated: 10 more sheets: 312 proteins from 2 A Reactome, 2 C 49 Proteomic analysis, Sig. 36hpi vs mock from rawdata, 2 D DAVID ALL, DAVID ALPHA, DAVID BETA, DAVID DELTA, DAVID BA.1, DAVID BA.5, UniprotID to function]
