# Supplementary material for: The comprehensive SARS-CoV-2 ‘hijackome’ knowledge base— reveals significant changes in host cell protein expression and activation by multiple SARS-CoV-2 variants
Source: Research Square preprint supplement (doi:10.21203/rs.3.rs-4322477/v1), 2024-05-10
Supplement: Supplementary file 7 [file ff3295eaf494f64da5aa8f88.xlsx]

## Sheet: Info
	EV06 - BioID results
	Sheet:	Description
	Filttered HCI	Filtered interactome of all SARS-CoV-2 bait proteins
	All interaction	All interactions before filtering step
	Reactome BioID & Total proteome	List of BioID and Total proteome at 36 hpi Reactome terms
	Venn_Reactome terms	venn diagram of BioID and Total proteome shared and non-shared reactome terms
	Venn_Genes	venn diagram of BioID and Total proteome shared and non-shared Genes

## Sheet: Filtered HCI 
Bait	Prey	PreyGene	Spec	SpecSum	AvgSpec	NumReplicates	ctrlCounts	AvgP	MaxP	TopoAvgP	TopoMaxP	SaintScore	logOddsScore	FoldChange	BFDR	boosted_by	Passes SAINT filter	PROTID	GENEID	Max_spc	Average_spc	n_positives	n_all	percentage	Passes crapome filter	Entry	Entry Name	Protein names	Gene Ontology (biological process)	Gene Ontology (cellular component)	Gene Ontology (molecular function)	Gene Names (primary)	Organism	Length	Mass	Subcellular location [CC]
E : P71L	A3KMH1	A3KMH1	3|2|2|2	9	2.25	4	0|0|1|0|0|0|1|0|1|0|0|0|1|0|0|0	0.81	0.94	0.81	0.94	0.81	1.16	9	0.03		TRUE	A3KMH1	VWA8	3	1.53846	13	68	19.1176	TRUE	A3KMH1	VWA8_HUMAN	von Willebrand factor A domain-containing protein 8 (PEX7-binding protein 2) (P7BP2)		cytoplasm [GO:0005737]; mitochondrion [GO:0005739]; peroxisome [GO:0005777]	ATP binding [GO:0005524]; ATP hydrolysis activity [GO:0016887]	VWA8	Homo sapiens (Human)	1905	214824	SUBCELLULAR LOCATION: [Isoform 1]: Mitochondrion {ECO:0000269|PubMed:30204880}.; SUBCELLULAR LOCATION: [Isoform 2]: Mitochondrion {ECO:0000269|PubMed:30204880}. Peroxisome {ECO:0000269|PubMed:30204880}. Note=Localizes to peroxisomes in a PEX7-dependent manner. {ECO:0000269|PubMed:30204880}.
E : P71L	O00468	O00468	3|4|7|6	20	5	4	0|0|0|0|0|0|0|0|0|0|0|0|0|0|0|0	1	1	1	1	1	4.83	50	0		TRUE	O00468	AGRN	2	1.2	5	68	7.35294	TRUE	O00468	AGRIN_HUMAN	Agrin [Cleaved into: Agrin N-terminal 110 kDa subunit; Agrin C-terminal 110 kDa subunit; Agrin C-terminal 90 kDa fragment (C90); Agrin C-terminal 22 kDa fragment (C22)]	animal organ morphogenesis [GO:0009887]; clustering of voltage-gated sodium channels [GO:0045162]; G protein-coupled acetylcholine receptor signaling pathway [GO:0007213]; neuromuscular junction development [GO:0007528]; positive regulation of filopodium assembly [GO:0051491]; positive regulation of GTPase activity [GO:0043547]; positive regulation of synaptic assembly at neuromuscular junction […	basement membrane [GO:0005604]; collagen-containing extracellular matrix [GO:0062023]; extracellular exosome [GO:0070062]; extracellular region [GO:0005576]; Golgi lumen [GO:0005796]; lysosomal lumen [GO:0043202]; plasma membrane [GO:0005886]; synapse [GO:0045202]	calcium ion binding [GO:0005509]; chondroitin sulfate binding [GO:0035374]; dystroglycan binding [GO:0002162]; heparan sulfate proteoglycan binding [GO:0043395]; laminin binding [GO:0043236]; sialic acid binding [GO:0033691]; structural constituent of cytoskeleton [GO:0005200]	AGRN	Homo sapiens (Human)	2068	217320	SUBCELLULAR LOCATION: [Isoform 1]: Secreted, extracellular space, extracellular matrix {ECO:0000269|PubMed:20551380}. Note=Synaptic basal lamina at the neuromuscular junction. {ECO:0000250|UniProtKB:P31696}.; SUBCELLULAR LOCATION: [Isoform 2]: Synapse {ECO:0000250|UniProtKB:A2ASQ1}. Cell membrane {ECO:0000250|UniProtKB:A2ASQ1}; Single-pass type II membrane protein {ECO:0000250|UniProtKB:A2ASQ1}.
E : P71L	O43592	O43592	14|13|17|16	60	15	4	0|0|0|0|0|1|0|0|0|0|0|0|0|3|2|3	1	1	1	1	1	7.32	26.67	0		TRUE	O43592	XPOT	43	4.83333	24	68	35.2941	TRUE	O43592	XPOT_HUMAN	Exportin-T (Exportin(tRNA)) (tRNA exportin)	intracellular protein transport [GO:0006886]; tRNA export from nucleus [GO:0006409]; tRNA re-export from nucleus [GO:0071528]	cytoplasm [GO:0005737]; cytosol [GO:0005829]; nuclear matrix [GO:0016363]; nuclear pore [GO:0005643]; nucleoplasm [GO:0005654]	small GTPase binding [GO:0031267]; tRNA binding [GO:0000049]	XPOT	Homo sapiens (Human)	962	109964	SUBCELLULAR LOCATION: Nucleus. Cytoplasm. Note=Nuclear, once bound to tRNA and Ran the complex translocates to the cytoplasm. Shuttles between the nucleus and the cytoplasm.
E : P71L	O76031	O76031	3|2|10|11	26	6.5	4	0|0|0|1|1|0|0|0|0|0|0|0|0|0|0|0	0.98	1	0.98	1	0.98	2.59	52	0		TRUE	O76031	CLPX	5	2.11538	26	68	38.2353	TRUE	O76031	CLPX_HUMAN	ATP-dependent Clp protease ATP-binding subunit clpX-like, mitochondrial	ATP metabolic process [GO:0046034]; proteolysis [GO:0006508]; proteolysis involved in protein catabolic process [GO:0051603]	cytosol [GO:0005829]; endopeptidase Clp complex [GO:0009368]; mitochondrial endopeptidase Clp complex [GO:0009841]; mitochondrial inner membrane [GO:0005743]; mitochondrial matrix [GO:0005759]; mitochondrial nucleoid [GO:0042645]; mitochondrion [GO:0005739]; nucleoplasm [GO:0005654]	ATP binding [GO:0005524]; ATP hydrolysis activity [GO:0016887]; ATP-dependent protein folding chaperone [GO:0140662]; peptidase activator activity [GO:0016504]; protein dimerization activity [GO:0046983]; unfolded protein binding [GO:0051082]; zinc ion binding [GO:0008270]	CLPX	Homo sapiens (Human)	633	69224	SUBCELLULAR LOCATION: Mitochondrion. Mitochondrion matrix, mitochondrion nucleoid.
E : P71L	O95168	O95168	2|2|2|4	10	2.5	4	0|0|0|0|0|0|0|0|0|0|0|0|0|0|0|0	0.96	1	0.96	1	0.96	2.98	25	0.01		TRUE	O95168	NDUFB4	2	1.28571	7	68	10.2941	TRUE	O95168	NDUB4_HUMAN	NADH dehydrogenase [ubiquinone] 1 beta subcomplex subunit 4 (Complex I-B15) (CI-B15) (NADH-ubiquinone oxidoreductase B15 subunit)	aerobic respiration [GO:0009060]; mitochondrial electron transport, NADH to ubiquinone [GO:0006120]; mitochondrial respiratory chain complex I assembly [GO:0032981]; proton motive force-driven mitochondrial ATP synthesis [GO:0042776]; response to oxidative stress [GO:0006979]	mitochondrial inner membrane [GO:0005743]; mitochondrial respiratory chain complex I [GO:0005747]; mitochondrion [GO:0005739]; nucleoplasm [GO:0005654]	NADH dehydrogenase (ubiquinone) activity [GO:0008137]	NDUFB4	Homo sapiens (Human)	129	15209	SUBCELLULAR LOCATION: Mitochondrion inner membrane {ECO:0000305|PubMed:12611891}; Single-pass membrane protein {ECO:0000255}; Matrix side {ECO:0000305}.
E : P71L	O95674	O95674	3|3|4|4	14	3.5	4	0|0|0|0|0|0|0|0|0|0|0|0|0|0|1|1	0.99	1	0.99	1	0.99	4.4	28	0		TRUE	O95674	CDS2	2	1.14286	14	68	20.5882	TRUE	O95674	CDS2_HUMAN	Phosphatidate cytidylyltransferase 2 (EC 2.7.7.41) (CDP-DAG synthase 2) (CDP-DG synthase 2) (CDP-diacylglycerol synthase 2) (CDS 2) (CDP-diglyceride pyrophosphorylase 2) (CDP-diglyceride synthase 2) (CTP:phosphatidate cytidylyltransferase 2)	CDP-diacylglycerol biosynthetic process [GO:0016024]; lipid droplet formation [GO:0140042]; phosphatidylglycerol biosynthetic process [GO:0006655]	endoplasmic reticulum [GO:0005783]; endoplasmic reticulum membrane [GO:0005789]; membrane [GO:0016020]; mitochondrial inner membrane [GO:0005743]	phosphatidate cytidylyltransferase activity [GO:0004605]	CDS2	Homo sapiens (Human)	445	51418	SUBCELLULAR LOCATION: Endoplasmic reticulum membrane {ECO:0000269|PubMed:25375833, ECO:0000269|PubMed:26946540, ECO:0000269|PubMed:31548309}; Multi-pass membrane protein {ECO:0000255}.
E : P71L	P08559	P08559	6|7|18|21	52	13	4	0|0|0|1|0|1|1|0|0|0|0|0|0|0|0|0	1	1	1	1	1	8.4	69.33	0		TRUE	P08559	PDHA1	15	3.8125	32	68	47.0588	TRUE	P08559	ODPA_HUMAN	Pyruvate dehydrogenase E1 component subunit alpha, somatic form, mitochondrial (EC 1.2.4.1) (PDHE1-A type I)	acetyl-CoA biosynthetic process from pyruvate [GO:0006086]; glucose metabolic process [GO:0006006]; mitochondrial acetyl-CoA biosynthetic process from pyruvate [GO:0061732]; tricarboxylic acid cycle [GO:0006099]	mitochondrial matrix [GO:0005759]; mitochondrial pyruvate dehydrogenase complex [GO:0005967]; mitochondrion [GO:0005739]; nucleolus [GO:0005730]; nucleus [GO:0005634]; pyruvate dehydrogenase complex [GO:0045254]	pyruvate dehydrogenase (acetyl-transferring) activity [GO:0004739]; pyruvate dehydrogenase (NAD+) activity [GO:0034604]	PDHA1	Homo sapiens (Human)	390	43296	SUBCELLULAR LOCATION: Mitochondrion matrix.
E : P71L	P10321	P10321	7|5|6|6	24	6	4	0|0|0|0|0|0|1|0|0|0|0|0|0|0|0|0	1	1	1	1	1	8.25	60	0		TRUE	P10321	HLA-C	2	1.5	2	68	2.94118	TRUE	P10321	HLAC_HUMAN	HLA class I histocompatibility antigen, C alpha chain (HLA-C) (HLA-Cw) (Human leukocyte antigen C)	adaptive immune response [GO:0002250]; antigen processing and presentation of endogenous peptide antigen via MHC class I via ER pathway, TAP-independent [GO:0002486]; immune response [GO:0006955]; innate immune response [GO:0045087]	cell surface [GO:0009986]; early endosome membrane [GO:0031901]; endoplasmic reticulum [GO:0005783]; endoplasmic reticulum membrane [GO:0005789]; ER to Golgi transport vesicle membrane [GO:0012507]; extracellular exosome [GO:0070062]; Golgi apparatus [GO:0005794]; Golgi membrane [GO:0000139]; membrane [GO:0016020]; MHC class I protein complex [GO:0042612]; phagocytic vesicle membrane [GO:0030670]…	peptide antigen binding [GO:0042605]; TAP binding [GO:0046977]	HLA-C	Homo sapiens (Human)	366	40649	SUBCELLULAR LOCATION: Cell membrane {ECO:0000269|PubMed:18420581, ECO:0000269|PubMed:20972337, ECO:0000269|PubMed:28649982}; Single-pass type I membrane protein {ECO:0000255}. Endoplasmic reticulum membrane {ECO:0000305|PubMed:18420581}; Single-pass membrane protein {ECO:0000255}.
E : P71L	P24666	P24666	4|3|4|3	14	3.5	4	0|0|0|0|0|0|0|0|0|0|0|0|0|0|0|0	1	1	1	1	1	4.83	35	0		TRUE	P24666	ACP1	3	1.75	4	68	5.88235	TRUE	P24666	PPAC_HUMAN	Low molecular weight phosphotyrosine protein phosphatase (LMW-PTP) (LMW-PTPase) (EC 3.1.3.48) (Adipocyte acid phosphatase) (Low molecular weight cytosolic acid phosphatase) (EC 3.1.3.2) (Red cell acid phosphatase 1)	protein dephosphorylation [GO:0006470]	cytoplasm [GO:0005737]; cytoplasmic side of plasma membrane [GO:0009898]; cytosol [GO:0005829]; extracellular exosome [GO:0070062]; sarcolemma [GO:0042383]	acid phosphatase activity [GO:0003993]; non-membrane spanning protein tyrosine phosphatase activity [GO:0004726]; protein tyrosine phosphatase activity [GO:0004725]	ACP1	Homo sapiens (Human)	158	18042	SUBCELLULAR LOCATION: Cytoplasm.
E : P71L	P55786	P55786	13|9|14|16	52	13	4	1|0|0|1|0|3|0|0|3|0|0|1|0|0|0|2	1	1	1	1	1	5.57	18.91	0		TRUE	P55786	NPEPPS	6	1.92857	28	68	41.1765	TRUE	P55786	PSA_HUMAN	Puromycin-sensitive aminopeptidase (PSA) (EC 3.4.11.14) (Cytosol alanyl aminopeptidase) (AAP-S)	cellular response to hypoxia [GO:0071456]; peptide catabolic process [GO:0043171]; positive regulation of protein targeting to mitochondrion [GO:1903955]; protein polyubiquitination [GO:0000209]; proteolysis [GO:0006508]	cytoplasm [GO:0005737]; cytosol [GO:0005829]; extracellular exosome [GO:0070062]; nucleus [GO:0005634]	aminopeptidase activity [GO:0004177]; metalloaminopeptidase activity [GO:0070006]; peptide binding [GO:0042277]; zinc ion binding [GO:0008270]	NPEPPS	Homo sapiens (Human)	919	103276	SUBCELLULAR LOCATION: Cytoplasm, cytosol {ECO:0000269|PubMed:10978616}. Nucleus {ECO:0000305}.
E : P71L	P62745	P62745	3|2|3|2	10	2.5	4	0|0|0|0|0|0|0|0|0|0|0|0|0|0|1|2	0.9	0.95	0.9	0.95	0.9	1.7	13.33	0.02		TRUE	P62745	RHOB	2	1.4	5	68	7.35294	TRUE	P62745	RHOB_HUMAN	Rho-related GTP-binding protein RhoB (Rho cDNA clone 6) (h6)	actin filament organization [GO:0007015]; angiogenesis [GO:0001525]; apoptotic process [GO:0006915]; cell adhesion [GO:0007155]; cell differentiation [GO:0030154]; cell migration [GO:0016477]; cellular response to hydrogen peroxide [GO:0070301]; cellular response to ionizing radiation [GO:0071479]; cortical cytoskeleton organization [GO:0030865]; endosome to lysosome transport [GO:0008333]; endot…	cell cortex [GO:0005938]; cell projection [GO:0042995]; cleavage furrow [GO:0032154]; cytoplasmic vesicle [GO:0031410]; cytoskeleton [GO:0005856]; cytosol [GO:0005829]; early endosome [GO:0005769]; endosome membrane [GO:0010008]; extracellular exosome [GO:0070062]; focal adhesion [GO:0005925]; late endosome membrane [GO:0031902]; nucleus [GO:0005634]; plasma membrane [GO:0005886]; Schaffer collat…	GDP binding [GO:0019003]; GTP binding [GO:0005525]; GTPase activity [GO:0003924]; protein kinase binding [GO:0019901]	RHOB	Homo sapiens (Human)	196	22123	SUBCELLULAR LOCATION: Late endosome membrane; Lipid-anchor. Cell membrane; Lipid-anchor. Nucleus. Cleavage furrow. Note=Late endosomal membrane (geranylgeranylated form). Plasma membrane (farnesylated form). Also detected at the nuclear margin and in the nucleus. Translocates to the equatorial region before furrow formation in a ECT2-dependent manner.
E : P71L	Q00577	Q00577	5|4|12|13	34	8.5	4	0|0|0|1|1|1|1|0|0|0|0|0|1|0|0|0	0.99	1	0.99	1	0.99	3.92	27.2	0		TRUE	Q00577	PURA	5	1.59259	27	68	39.7059	TRUE	Q00577	PURA_HUMAN	Transcriptional activator protein Pur-alpha (Purine-rich single-stranded DNA-binding protein alpha)	cell differentiation [GO:0030154]; dendritic transport of messenger ribonucleoprotein complex [GO:0098963]; DNA replication initiation [GO:0006270]; DNA unwinding involved in DNA replication [GO:0006268]; epithelial cell proliferation [GO:0050673]; lymphocyte proliferation [GO:0046651]; negative regulation of DNA-binding transcription factor activity [GO:0043433]; negative regulation of transcrip…	chromosome, telomeric region [GO:0000781]; dendrite cytoplasm [GO:0032839]; glutamatergic synapse [GO:0098978]; neuronal cell body [GO:0043025]; nucleus [GO:0005634]; postsynapse [GO:0098794]	DNA-binding transcription factor activity, RNA polymerase II-specific [GO:0000981]; DNA-binding transcription factor binding [GO:0140297]; double-stranded telomeric DNA binding [GO:0003691]; mRNA regulatory element binding translation repressor activity [GO:0000900]; purine-rich negative regulatory element binding [GO:0032422]; RNA binding [GO:0003723]; RNA polymerase II transcription regulatory …	PURA	Homo sapiens (Human)	322	34911	SUBCELLULAR LOCATION: Nucleus.
E : P71L	Q12849	Q12849	5|7|7|8	27	6.75	4	0|0|0|0|0|0|1|0|0|0|0|0|0|1|0|0	1	1	1	1	1	7.79	54	0		TRUE	Q12849	GRSF1	5	2	33	68	48.5294	TRUE	Q12849	GRSF1_HUMAN	G-rich sequence factor 1 (GRSF-1)	anterior/posterior pattern specification [GO:0009952]; morphogenesis of embryonic epithelium [GO:0016331]; mRNA polyadenylation [GO:0006378]; positive regulation of mitochondrial RNA catabolic process [GO:0000962]; regulation of RNA splicing [GO:0043484]; tRNA processing [GO:0008033]	cytoplasm [GO:0005737]; mitochondrial nucleoid [GO:0042645]; mitochondrion [GO:0005739]; nucleoplasm [GO:0005654]; ribonucleoprotein complex [GO:1990904]; ribonucleoprotein granule [GO:0035770]	mRNA binding [GO:0003729]; RNA binding [GO:0003723]	GRSF1	Homo sapiens (Human)	480	53126	SUBCELLULAR LOCATION: [Isoform 1]: Mitochondrion matrix {ECO:0000269|PubMed:23473033, ECO:0000269|PubMed:23473034, ECO:0000269|PubMed:25683715, ECO:0000269|PubMed:29967381}. Note=Localizes to mitochondrial RNA granules found in close proximity to the mitochondrial nucleoids. {ECO:0000269|PubMed:23473033, ECO:0000269|PubMed:23473034, ECO:0000269|PubMed:25683715}.; SUBCELLULAR LOCATION: [Isoform 2]…
E : P71L	Q14573	Q14573	18|20|10|15	63	15.75	4	0|0|0|0|0|0|0|0|0|0|0|0|0|0|1|1	1	1	1	1	1	15.68	126	0		TRUE	Q14573	ITPR3	22	2.875	24	68	35.2941	TRUE	Q14573	ITPR3_HUMAN	Inositol 1,4,5-trisphosphate receptor type 3 (IP3 receptor isoform 3) (IP3R 3) (InsP3R3) (Type 3 inositol 1,4,5-trisphosphate receptor) (Type 3 InsP3 receptor)	G protein-coupled receptor signaling pathway [GO:0007186]; long-term synaptic potentiation [GO:0060291]; memory [GO:0007613]; positive regulation of cytosolic calcium ion concentration [GO:0007204]; response to calcium ion [GO:0051592]; sensory perception of bitter taste [GO:0050913]; sensory perception of sweet taste [GO:0050916]; sensory perception of taste [GO:0050909]; sensory perception of u…	apical part of cell [GO:0045177]; brush border [GO:0005903]; cytoplasm [GO:0005737]; cytoplasmic vesicle membrane [GO:0030659]; endoplasmic reticulum [GO:0005783]; endoplasmic reticulum membrane [GO:0005789]; membrane [GO:0016020]; myelin sheath [GO:0043209]; neuronal cell body [GO:0043025]; nuclear outer membrane [GO:0005640]; nucleolus [GO:0005730]; nucleoplasm [GO:0005654]; plasma membrane [GO…	calcium ion binding [GO:0005509]; calcium-release channel activity [GO:0015278]; inositol 1,3,4,5 tetrakisphosphate binding [GO:0043533]; inositol 1,4,5 trisphosphate binding [GO:0070679]; inositol 1,4,5-trisphosphate-sensitive calcium-release channel activity [GO:0005220]; inositol hexakisphosphate binding [GO:0000822]; phosphatidylinositol binding [GO:0035091]	ITPR3	Homo sapiens (Human)	2671	304106	SUBCELLULAR LOCATION: Endoplasmic reticulum membrane; Multi-pass membrane protein.
E : P71L	Q14574	Q14574	2|2|4|3	11	2.75	4	0|0|0|0|0|0|0|0|0|0|0|0|0|0|0|0	0.97	1	0.97	1	0.97	2.98	27.5	0		TRUE	Q14574	DSC3	2	1.125	8	68	11.7647	TRUE	Q14574	DSC3_HUMAN	Desmocollin-3 (Cadherin family member 3) (Desmocollin-4) (HT-CP)	cell adhesion [GO:0007155]; cell-cell adhesion [GO:0098609]; homophilic cell adhesion via plasma membrane adhesion molecules [GO:0007156]; in utero embryonic development [GO:0001701]; protein stabilization [GO:0050821]	cell junction [GO:0030054]; cell-cell junction [GO:0005911]; cornified envelope [GO:0001533]; cytoplasm [GO:0005737]; desmosome [GO:0030057]; extracellular region [GO:0005576]; membrane [GO:0016020]; plasma membrane [GO:0005886]	calcium ion binding [GO:0005509]; gamma-catenin binding [GO:0045295]	DSC3	Homo sapiens (Human)	896	99969	SUBCELLULAR LOCATION: Cell membrane; Single-pass type I membrane protein. Cell junction, desmosome.
E : P71L	Q15629	Q15629	4|3|3|3	13	3.25	4	0|0|0|0|0|0|0|0|0|0|0|0|0|0|0|1	0.99	1	0.99	1	0.99	4.83	32.5	0		TRUE	Q15629	TRAM1	3	1.46154	13	68	19.1176	TRUE	Q15629	TRAM1_HUMAN	Translocating chain-associated membrane protein 1 (Protein TRAM1)	cotranslational protein targeting to membrane [GO:0006613]; protein insertion into ER membrane [GO:0045048]; response to unfolded protein [GO:0006986]; SRP-dependent cotranslational protein targeting to membrane, translocation [GO:0006616]	endoplasmic reticulum [GO:0005783]; endoplasmic reticulum membrane [GO:0005789]; membrane [GO:0016020]	signaling receptor activity [GO:0038023]	TRAM1	Homo sapiens (Human)	374	43072	SUBCELLULAR LOCATION: Endoplasmic reticulum membrane {ECO:0000269|PubMed:12475939, ECO:0000269|PubMed:1315422, ECO:0000269|PubMed:20430023, ECO:0000269|PubMed:8616892, ECO:0000269|PubMed:9506517}; Multi-pass membrane protein {ECO:0000255}.
E : P71L	Q5HYI8	Q5HYI8	10|6|4|10	30	7.5	4	0|0|0|0|0|0|0|0|0|0|0|0|0|0|0|0	1	1	1	1	1	6.57	75	0		TRUE	Q5HYI8	RABL3	3	1.44444	9	68	13.2353	TRUE	Q5HYI8	RABL3_HUMAN	Rab-like protein 3	B cell differentiation [GO:0030183]; intracellular protein transport [GO:0006886]; natural killer cell differentiation [GO:0001779]; protein stabilization [GO:0050821]; regulation of protein lipidation [GO:1903059]; regulation of Ras protein signal transduction [GO:0046578]; T cell differentiation in thymus [GO:0033077]		GTP binding [GO:0005525]; GTPase activity [GO:0003924]; protein homodimerization activity [GO:0042803]	RABL3	Homo sapiens (Human)	236	26423
E : P71L	Q5T9A4	Q5T9A4	8|9|5|6	28	7	4	1|0|2|0|0|0|0|0|1|2|0|2|0|0|0|0	0.99	1	0.99	1	0.99	3.7	14	0		TRUE	Q5T9A4	ATAD3B	5	1.875	16	68	23.5294	TRUE	Q5T9A4	ATD3B_HUMAN	ATPase family AAA domain-containing protein 3B (AAA-TOB3)	mitochondrion organization [GO:0007005]	ficolin-1-rich granule membrane [GO:0101003]; mitochondrial inner membrane [GO:0005743]; mitochondrion [GO:0005739]; plasma membrane [GO:0005886]; secretory granule membrane [GO:0030667]	ATP binding [GO:0005524]; ATP hydrolysis activity [GO:0016887]	ATAD3B	Homo sapiens (Human)	648	72573	SUBCELLULAR LOCATION: Mitochondrion inner membrane {ECO:0000269|PubMed:16909202, ECO:0000269|PubMed:18063578}; Peripheral membrane protein {ECO:0000269|PubMed:16909202, ECO:0000269|PubMed:18063578}. Note=Has been found to co-purify with nucleoids (PubMed:22453275). Since it does not face the mitochondrial matrix, the association with nucleoids could be mediated by ATAD3A. {ECO:0000269|PubMed:2245…
E : P71L	Q6P161	Q6P161	2|2|2|2	8	2	4	0|0|0|1|0|1|0|0|0|0|0|0|0|0|0|0	0.93	0.93	0.93	0.93	0.93	2.59	16	0.01		TRUE	Q6P161	MRPL54	2	1.33333	12	68	17.6471	TRUE	Q6P161	RM54_HUMAN	39S ribosomal protein L54, mitochondrial (L54mt) (MRP-L54) (Mitochondrial large ribosomal subunit protein mL54)	mitochondrial translation [GO:0032543]	mitochondrial inner membrane [GO:0005743]; mitochondrial large ribosomal subunit [GO:0005762]; mitochondrion [GO:0005739]	RNA binding [GO:0003723]; structural constituent of ribosome [GO:0003735]	MRPL54	Homo sapiens (Human)	138	15819	SUBCELLULAR LOCATION: Mitochondrion {ECO:0000269|PubMed:25838379, ECO:0000269|PubMed:28892042}.
E : P71L	Q7LGA3	Q7LGA3	5|4|5|3	17	4.25	4	0|0|0|0|0|0|0|0|0|0|0|0|0|0|0|0	1	1	1	1	1	4.83	42.5	0		TRUE	Q7LGA3	HS2ST1	2	1.2	5	68	7.35294	TRUE	Q7LGA3	HS2ST_HUMAN	Heparan sulfate 2-O-sulfotransferase 1 (2-O-sulfotransferase) (2OST) (EC 2.8.2.-)	gene expression [GO:0010467]; heparan sulfate proteoglycan biosynthetic process [GO:0015012]; heparan sulfate proteoglycan biosynthetic process, enzymatic modification [GO:0015015]; heparan sulfate proteoglycan biosynthetic process, polysaccharide chain biosynthetic process [GO:0015014]; heparin metabolic process [GO:0030202]; ureteric bud formation [GO:0060676]	Golgi membrane [GO:0000139]; membrane [GO:0016020]	heparan sulfate 2-O-sulfotransferase activity [GO:0004394]; sulfotransferase activity [GO:0008146]	HS2ST1	Homo sapiens (Human)	356	41881	SUBCELLULAR LOCATION: Golgi apparatus membrane {ECO:0000250}; Single-pass type II membrane protein {ECO:0000250}.
E : P71L	Q96JJ7	Q96JJ7	2|2|2|4	10	2.5	4	0|0|0|0|0|0|0|0|0|0|0|0|0|0|0|0	0.96	1	0.96	1	0.96	2.98	25	0.01		TRUE	Q96JJ7	TMX3	2	1.5	2	68	2.94118	TRUE	Q96JJ7	TMX3_HUMAN	Protein disulfide-isomerase TMX3 (EC 5.3.4.1) (Thioredoxin domain-containing protein 10) (Thioredoxin-related transmembrane protein 3)	peptidyl-cysteine oxidation [GO:0018171]	cell surface [GO:0009986]; endoplasmic reticulum [GO:0005783]; endoplasmic reticulum membrane [GO:0005789]; plasma membrane [GO:0005886]; platelet alpha granule membrane [GO:0031092]	protein disulfide isomerase activity [GO:0003756]; protein-disulfide reductase activity [GO:0015035]	TMX3	Homo sapiens (Human)	454	51872	SUBCELLULAR LOCATION: Endoplasmic reticulum membrane {ECO:0000269|PubMed:15623505}; Single-pass membrane protein {ECO:0000269|PubMed:15623505}.
E : P71L	Q9H0U3	Q9H0U3	3|2|4|5	14	3.5	4	1|0|1|0|1|0|0|1|1|0|1|1|0|0|0|1	0.8	0.98	0.8	0.98	0.8	-0.06	7	0.03		TRUE	Q9H0U3	MAGT1	3	1.11765	17	68	25	TRUE	Q9H0U3	MAGT1_HUMAN	Magnesium transporter protein 1 (MagT1) (Dolichyl-diphosphooligosaccharide--protein glycosyltransferase subunit MAGT1) (Oligosaccharyl transferase subunit MAGT1) (Implantation-associated protein) (IAP)	cognition [GO:0050890]; magnesium ion transport [GO:0015693]; protein N-linked glycosylation [GO:0006487]; protein N-linked glycosylation via asparagine [GO:0018279]; transmembrane transport [GO:0055085]	azurophil granule membrane [GO:0035577]; endoplasmic reticulum [GO:0005783]; endoplasmic reticulum membrane [GO:0005789]; membrane [GO:0016020]; oligosaccharyltransferase complex [GO:0008250]; plasma membrane [GO:0005886]	magnesium ion transmembrane transporter activity [GO:0015095]	MAGT1	Homo sapiens (Human)	335	38037	SUBCELLULAR LOCATION: Cell membrane {ECO:0000269|PubMed:19717468}; Multi-pass membrane protein {ECO:0000269|PubMed:19717468}. Endoplasmic reticulum {ECO:0000269|PubMed:25135935}. Endoplasmic reticulum membrane {ECO:0000250}; Multi-pass membrane protein {ECO:0000250}.
E : P71L	Q9NSE4	Q9NSE4	19|10|6|7	42	10.5	4	4|3|4|0|0|0|1|0|2|5|4|2|1|2|1|3	0.8	1	0.8	1	0.8	-0.01	5.25	0.03		TRUE	Q9NSE4	IARS2	5	2.25	32	68	47.0588	TRUE	Q9NSE4	SYIM_HUMAN	Isoleucine--tRNA ligase, mitochondrial (EC 6.1.1.5) (Isoleucyl-tRNA synthetase) (IleRS)	isoleucyl-tRNA aminoacylation [GO:0006428]; mitochondrial translation [GO:0032543]; tRNA aminoacylation for protein translation [GO:0006418]	mitochondrial matrix [GO:0005759]; mitochondrion [GO:0005739]	aminoacyl-tRNA editing activity [GO:0002161]; ATP binding [GO:0005524]; isoleucine-tRNA ligase activity [GO:0004822]; tRNA binding [GO:0000049]	IARS2	Homo sapiens (Human)	1012	113792	SUBCELLULAR LOCATION: Mitochondrion matrix {ECO:0000250}.
E : P71L	Q9NUL7	Q9NUL7	2|5|3|3	13	3.25	4	0|0|0|2|1|0|0|2|0|0|0|0|0|0|0|0	0.86	0.98	0.86	0.98	0.86	0.8	10.4	0.02		TRUE	Q9NUL7	DDX28	3	2	4	68	5.88235	TRUE	Q9NUL7	DDX28_HUMAN	Probable ATP-dependent RNA helicase DDX28 (EC 3.6.4.13) (Mitochondrial DEAD box protein 28)	mitochondrial large ribosomal subunit assembly [GO:1902775]	cytosol [GO:0005829]; mitochondrial nucleoid [GO:0042645]; mitochondrion [GO:0005739]; nucleolus [GO:0005730]; nucleoplasm [GO:0005654]; ribonucleoprotein granule [GO:0035770]	ATP binding [GO:0005524]; ATP hydrolysis activity [GO:0016887]; RNA binding [GO:0003723]; RNA helicase activity [GO:0003724]; rRNA binding [GO:0019843]	DDX28	Homo sapiens (Human)	540	59581	SUBCELLULAR LOCATION: Nucleus {ECO:0000269|PubMed:11350955, ECO:0000269|PubMed:25683708}. Mitochondrion {ECO:0000269|PubMed:11350955}. Mitochondrion matrix, mitochondrion nucleoid {ECO:0000269|PubMed:25683715}. Mitochondrion matrix {ECO:0000269|PubMed:25683708}. Note=Transported between these two compartments. Nuclear localization depends on active RNA polymerase II transcription. Localizes to mi…
E : P71L	Q9NZT1	Q9NZT1	3|4|3|6	16	4	4	0|0|0|0|0|0|0|0|0|0|0|0|0|0|0|0	1	1	1	1	1	4.83	40	0		TRUE	Q9NZT1	CALML5	1	1	2	68	2.94118	TRUE	Q9NZT1	CALL5_HUMAN	Calmodulin-like protein 5 (Calmodulin-like skin protein)	epidermis development [GO:0008544]; signal transduction [GO:0007165]	extracellular region [GO:0005576]; ficolin-1-rich granule lumen [GO:1904813]	calcium ion binding [GO:0005509]; enzyme regulator activity [GO:0030234]	CALML5	Homo sapiens (Human)	146	15893
E : P71L	Q9Y287	Q9Y287	4|7|7|8	26	6.5	4	0|0|0|0|0|0|0|0|0|0|0|0|2|0|1|1	1	1	1	1	1	4.01	26	0		TRUE	Q9Y287	ITM2B	3	1.41667	12	68	17.6471	TRUE	Q9Y287	ITM2B_HUMAN	Integral membrane protein 2B (Immature BRI2) (imBRI2) (Protein E25B) (Transmembrane protein BRI) (Bri) [Cleaved into: BRI2, membrane form (Mature BRI2) (mBRI2); BRI2 intracellular domain (BRI2 ICD); BRI2C, soluble form; Bri23 peptide (Bri2-23) (ABri23) (C-terminal peptide) (P23 peptide)]	negative regulation of amyloid precursor protein biosynthetic process [GO:0042985]; nervous system development [GO:0007399]	endosome membrane [GO:0010008]; extracellular exosome [GO:0070062]; extracellular region [GO:0005576]; extracellular space [GO:0005615]; Golgi apparatus [GO:0005794]; Golgi membrane [GO:0000139]; Golgi-associated vesicle membrane [GO:0030660]; intracellular membrane-bounded organelle [GO:0043231]; membrane [GO:0016020]; organelle membrane [GO:0031090]; plasma membrane [GO:0005886]	amyloid-beta binding [GO:0001540]; ATP binding [GO:0005524]	ITM2B	Homo sapiens (Human)	266	30338	SUBCELLULAR LOCATION: [Integral membrane protein 2B]: Golgi apparatus membrane {ECO:0000269|PubMed:14656991, ECO:0000269|PubMed:19114711}; Single-pass type II membrane protein {ECO:0000269|PubMed:10526337}. Note=Immature BRI2 (imBRI2) is cleaved by furin in the Golgi into mBRI2 and a Bri23 peptide. mBRI2 is transported to the plasma membrane and Bri23 peptide is secreted.; SUBCELLULAR LOCATION: […
E : P71L	Q9Y673	Q9Y673	2|3|3|4	12	3	4	0|0|0|0|0|0|0|0|0|0|0|0|0|0|0|0	0.98	1	0.98	1	0.98	2.98	30	0		TRUE	Q9Y673	ALG5	5	2	6	68	8.82353	TRUE	Q9Y673	ALG5_HUMAN	Dolichyl-phosphate beta-glucosyltransferase (DolP-glucosyltransferase) (EC 2.4.1.117) (Asparagine-linked glycosylation protein 5 homolog)	determination of left/right symmetry [GO:0007368]; protein glycosylation [GO:0006486]; protein N-linked glycosylation [GO:0006487]; protein N-linked glycosylation via asparagine [GO:0018279]	endoplasmic reticulum membrane [GO:0005789]; membrane [GO:0016020]	dolichyl-phosphate beta-glucosyltransferase activity [GO:0004581]; oligosaccharyl transferase activity [GO:0004576]	ALG5	Homo sapiens (Human)	324	36946	SUBCELLULAR LOCATION: Endoplasmic reticulum membrane {ECO:0000250}; Single-pass type II membrane protein {ECO:0000250}.
E : WT	O75976	O75976	10|13|19|21	63	15.75	4	0|0|0|0|0|0|0|0|0|0|0|0|0|0|0|0	1	1	1	1	1	16.18	157.5	0		TRUE	O75976	CPD	9	3.25926	27	68	39.7059	TRUE	O75976	CBPD_HUMAN	Carboxypeptidase D (EC 3.4.17.22) (Metallocarboxypeptidase D) (gp180)	peptide metabolic process [GO:0006518]; protein processing [GO:0016485]	extracellular exosome [GO:0070062]; extracellular space [GO:0005615]; membrane [GO:0016020]; plasma membrane [GO:0005886]	metallocarboxypeptidase activity [GO:0004181]; serine-type carboxypeptidase activity [GO:0004185]; zinc ion binding [GO:0008270]	CPD	Homo sapiens (Human)	1380	152931	SUBCELLULAR LOCATION: Cell membrane {ECO:0000250|UniProtKB:Q90240}; Single-pass type I membrane protein {ECO:0000255}.
E : WT	P43307	P43307	3|4|3|2	12	3	4	0|0|0|1|0|0|0|0|0|0|0|0|0|0|0|0	0.98	1	0.98	1	0.98	2.98	30	0		TRUE	P43307	SSR1	5	1.88889	9	68	13.2353	TRUE	P43307	SSRA_HUMAN	Translocon-associated protein subunit alpha (TRAP-alpha) (Signal sequence receptor subunit alpha) (SSR-alpha)	cotranslational protein targeting to membrane [GO:0006613]; positive regulation of cell population proliferation [GO:0008284]	endoplasmic reticulum [GO:0005783]; endoplasmic reticulum membrane [GO:0005789]; membrane [GO:0016020]		SSR1	Homo sapiens (Human)	286	32235	SUBCELLULAR LOCATION: Endoplasmic reticulum membrane; Single-pass type I membrane protein.
E : WT	P43897	P43897	3|4|3|2	12	3	4	0|0|0|1|2|1|0|1|0|0|0|0|0|0|0|0	0.88	0.99	0.88	0.99	0.88	0.84	9.6	0.02		TRUE	P43897	TSFM	3	1.5	12	68	17.6471	TRUE	P43897	EFTS_HUMAN	Elongation factor Ts, mitochondrial (EF-Ts) (EF-TsMt)	mitochondrial translational elongation [GO:0070125]; regulation of DNA-templated transcription elongation [GO:0032784]; regulation of mitochondrial translation [GO:0070129]; translational elongation [GO:0006414]	mitochondrial matrix [GO:0005759]; mitochondrion [GO:0005739]; nucleoplasm [GO:0005654]	RNA binding [GO:0003723]; translation elongation factor activity [GO:0003746]	TSFM	Homo sapiens (Human)	325	35391	SUBCELLULAR LOCATION: Mitochondrion.
E : WT	P49753	P49753	17|24|22|24	87	21.75	4	0|0|0|0|0|0|0|0|0|0|0|0|0|0|0|0	1	1	1	1	1	26.74	217.5	0		TRUE	P49753	ACOT2	1	1	3	68	4.41176	TRUE	P49753	ACOT2_HUMAN	Acyl-coenzyme A thioesterase 2, mitochondrial (Acyl-CoA thioesterase 2) (EC 3.1.2.2) (Acyl-coenzyme A thioester hydrolase 2a) (CTE-Ia) (Long-chain acyl-CoA thioesterase 2) (ZAP128)	acyl-CoA metabolic process [GO:0006637]; fatty acid metabolic process [GO:0006631]; long-chain fatty acid metabolic process [GO:0001676]; very long-chain fatty acid metabolic process [GO:0000038]	cytosol [GO:0005829]; mitochondrial matrix [GO:0005759]; mitochondrion [GO:0005739]; peroxisomal matrix [GO:0005782]	acyl-CoA hydrolase activity [GO:0047617]; carboxylic ester hydrolase activity [GO:0052689]; myristoyl-CoA hydrolase activity [GO:0102991]; palmitoyl-CoA hydrolase activity [GO:0016290]	ACOT2	Homo sapiens (Human)	483	53218	SUBCELLULAR LOCATION: Mitochondrion {ECO:0000269|PubMed:16940157}.
E : WT	P53801	P53801	2|4|3|3	12	3	4	0|0|0|0|1|0|0|0|0|0|0|0|2|0|0|0	0.93	0.98	0.93	0.98	0.93	1.7	16	0.01		TRUE	P53801	PTTG1IP	2	1.66667	3	68	4.41176	TRUE	P53801	PTTG_HUMAN	Pituitary tumor-transforming gene 1 protein-interacting protein (Pituitary tumor-transforming gene protein-binding factor) (PBF) (PTTG-binding factor)	negative regulation of DNA damage response, signal transduction by p53 class mediator [GO:0043518]; negative regulation of intrinsic apoptotic signaling pathway by p53 class mediator [GO:1902254]; positive regulation of protein ubiquitination [GO:0031398]; protein import into nucleus [GO:0006606]	cytoplasm [GO:0005737]; extracellular exosome [GO:0070062]; membrane [GO:0016020]; nucleoplasm [GO:0005654]; nucleus [GO:0005634]	p53 binding [GO:0002039]	PTTG1IP	Homo sapiens (Human)	180	20324	SUBCELLULAR LOCATION: Membrane {ECO:0000305}; Single-pass type I membrane protein {ECO:0000305}. Cytoplasm {ECO:0000269|PubMed:10781616}. Nucleus {ECO:0000269|PubMed:10781616}. Note=According to PubMed:10781616, it is found in the cytoplasm and the nucleus.
E : WT	P55786	P55786	16|13|17|12	58	14.5	4	1|0|0|1|0|3|0|0|3|0|0|1|0|0|0|2	1	1	1	1	1	7.98	21.09	0		TRUE	P55786	NPEPPS	6	1.92857	28	68	41.1765	TRUE	P55786	PSA_HUMAN	Puromycin-sensitive aminopeptidase (PSA) (EC 3.4.11.14) (Cytosol alanyl aminopeptidase) (AAP-S)	cellular response to hypoxia [GO:0071456]; peptide catabolic process [GO:0043171]; positive regulation of protein targeting to mitochondrion [GO:1903955]; protein polyubiquitination [GO:0000209]; proteolysis [GO:0006508]	cytoplasm [GO:0005737]; cytosol [GO:0005829]; extracellular exosome [GO:0070062]; nucleus [GO:0005634]	aminopeptidase activity [GO:0004177]; metalloaminopeptidase activity [GO:0070006]; peptide binding [GO:0042277]; zinc ion binding [GO:0008270]	NPEPPS	Homo sapiens (Human)	919	103276	SUBCELLULAR LOCATION: Cytoplasm, cytosol {ECO:0000269|PubMed:10978616}. Nucleus {ECO:0000305}.
E : WT	P61586	P61586	7|6|6|4	23	5.75	4	0|0|0|0|0|0|0|0|0|0|0|0|4|1|1|1	0.94	0.98	0.94	0.98	0.94	1.94	13.14	0.01		TRUE	P61586	RHOA	2	1.21212	33	68	48.5294	TRUE	P61586	RHOA_HUMAN	Transforming protein RhoA (EC 3.6.5.2) (Rho cDNA clone 12) (h12)	actin cytoskeleton organization [GO:0030036]; actin cytoskeleton reorganization [GO:0031532]; actin filament organization [GO:0007015]; alpha-beta T cell lineage commitment [GO:0002363]; androgen receptor signaling pathway [GO:0030521]; angiotensin-mediated vasoconstriction involved in regulation of systemic arterial blood pressure [GO:0001998]; apical junction assembly [GO:0043297]; apolipoprote…	apical junction complex [GO:0043296]; axon [GO:0030424]; cell cortex [GO:0005938]; cell junction [GO:0030054]; cell periphery [GO:0071944]; cell projection [GO:0042995]; cleavage furrow [GO:0032154]; cytoplasmic vesicle [GO:0031410]; cytoskeleton [GO:0005856]; cytosol [GO:0005829]; dendritic spine [GO:0043197]; endoplasmic reticulum membrane [GO:0005789]; endosome [GO:0005768]; extracellular exos…	G protein activity [GO:0003925]; GDP binding [GO:0019003]; GTP binding [GO:0005525]; GTPase activity [GO:0003924]; myosin binding [GO:0017022]; protein domain specific binding [GO:0019904]; protein kinase binding [GO:0019901]; Rho GDP-dissociation inhibitor binding [GO:0051022]	RHOA	Homo sapiens (Human)	193	21768	SUBCELLULAR LOCATION: Cell membrane; Lipid-anchor; Cytoplasmic side. Cytoplasm, cytoskeleton. Cleavage furrow. Cytoplasm, cell cortex {ECO:0000269|PubMed:9635436}. Midbody. Cell projection, lamellipodium {ECO:0000250|UniProtKB:Q9QUI0}. Cell projection, dendrite {ECO:0000250|UniProtKB:Q9QUI0}. Nucleus {ECO:0000269|PubMed:12551911}. Note=Localized to cell-cell contacts in calcium-treated keratinocy…
E : WT	P63027	P63027	3|3|4|5	15	3.75	4	0|0|0|0|0|0|0|0|0|0|0|0|0|0|0|0	1	1	1	1	1	4.83	37.5	0		TRUE	P63027	VAMP2	1	1	13	68	19.1176	TRUE	P63027	VAMP2_HUMAN	Vesicle-associated membrane protein 2 (VAMP-2) (Synaptobrevin-2)	calcium-ion regulated exocytosis [GO:0017156]; cellular response to insulin stimulus [GO:0032869]; eosinophil degranulation [GO:0043308]; exocytosis [GO:0006887]; Golgi to plasma membrane protein transport [GO:0043001]; long-term synaptic potentiation [GO:0060291]; membrane fusion [GO:0061025]; positive regulation of intracellular protein transport [GO:0090316]; protein transport [GO:0015031]; pr…	clathrin-coated endocytic vesicle membrane [GO:0030669]; clathrin-coated vesicle [GO:0030136]; clathrin-sculpted gamma-aminobutyric acid transport vesicle membrane [GO:0061202]; clathrin-sculpted glutamate transport vesicle membrane [GO:0060203]; clathrin-sculpted monoamine transport vesicle membrane [GO:0070083]; cytoplasmic vesicle [GO:0031410]; cytosol [GO:0005829]; intracellular membrane-boun…	calcium-dependent protein binding [GO:0048306]; calmodulin binding [GO:0005516]; phospholipid binding [GO:0005543]; protein self-association [GO:0043621]; SNAP receptor activity [GO:0005484]; SNARE binding [GO:0000149]; syntaxin binding [GO:0019905]; syntaxin-1 binding [GO:0017075]	VAMP2	Homo sapiens (Human)	116	12663	SUBCELLULAR LOCATION: Cytoplasmic vesicle, secretory vesicle, synaptic vesicle membrane {ECO:0000269|PubMed:17313651}; Single-pass type IV membrane protein {ECO:0000255}. Cell membrane {ECO:0000250|UniProtKB:P63045}. Note=Colocalizes with PRKCZ and WDFY2 in intracellular vesicles (PubMed:17313651). {ECO:0000269|PubMed:17313651}.
E : WT	Q12849	Q12849	1|4|9|12	26	6.5	4	0|0|0|0|0|0|1|0|0|0|0|0|0|1|0|0	0.75	1	0.75	1	0.75	0.64	52	0.04		TRUE	Q12849	GRSF1	5	2	33	68	48.5294	TRUE	Q12849	GRSF1_HUMAN	G-rich sequence factor 1 (GRSF-1)	anterior/posterior pattern specification [GO:0009952]; morphogenesis of embryonic epithelium [GO:0016331]; mRNA polyadenylation [GO:0006378]; positive regulation of mitochondrial RNA catabolic process [GO:0000962]; regulation of RNA splicing [GO:0043484]; tRNA processing [GO:0008033]	cytoplasm [GO:0005737]; mitochondrial nucleoid [GO:0042645]; mitochondrion [GO:0005739]; nucleoplasm [GO:0005654]; ribonucleoprotein complex [GO:1990904]; ribonucleoprotein granule [GO:0035770]	mRNA binding [GO:0003729]; RNA binding [GO:0003723]	GRSF1	Homo sapiens (Human)	480	53126	SUBCELLULAR LOCATION: [Isoform 1]: Mitochondrion matrix {ECO:0000269|PubMed:23473033, ECO:0000269|PubMed:23473034, ECO:0000269|PubMed:25683715, ECO:0000269|PubMed:29967381}. Note=Localizes to mitochondrial RNA granules found in close proximity to the mitochondrial nucleoids. {ECO:0000269|PubMed:23473033, ECO:0000269|PubMed:23473034, ECO:0000269|PubMed:25683715}.; SUBCELLULAR LOCATION: [Isoform 2]…
E : WT	Q32P28	Q32P28	3|4|2|2	11	2.75	4	0|0|0|0|0|0|0|2|0|0|0|0|0|0|0|0	0.95	0.99	0.95	0.99	0.95	2.43	22	0.01		TRUE	Q32P28	P3H1	2	1.23077	13	68	19.1176	TRUE	Q32P28	P3H1_HUMAN	Prolyl 3-hydroxylase 1 (EC 1.14.11.7) (Growth suppressor 1) (Leucine- and proline-enriched proteoglycan 1) (Leprecan-1)	bone development [GO:0060348]; chaperone-mediated protein folding [GO:0061077]; collagen metabolic process [GO:0032963]; negative regulation of cell population proliferation [GO:0008285]; negative regulation of post-translational protein modification [GO:1901874]; positive regulation of neuron projection development [GO:0010976]; protein folding [GO:0006457]; protein hydroxylation [GO:0018126]; p…	cytoplasm [GO:0005737]; endoplasmic reticulum [GO:0005783]; endoplasmic reticulum lumen [GO:0005788]; extracellular exosome [GO:0070062]; membrane [GO:0016020]; nucleus [GO:0005634]; protein-containing complex [GO:0032991]	iron ion binding [GO:0005506]; L-ascorbic acid binding [GO:0031418]; procollagen-proline 3-dioxygenase activity [GO:0019797]	P3H1	Homo sapiens (Human)	736	83394	SUBCELLULAR LOCATION: [Isoform 1]: Endoplasmic reticulum.; SUBCELLULAR LOCATION: Secreted, extracellular space, extracellular matrix {ECO:0000250}. Note=Secreted into the extracellular matrix as a chondroitin sulfate proteoglycan (CSPG). {ECO:0000269|PubMed:19088120}.
E : WT	Q4ZIN3	Q4ZIN3	2|2|3|2	9	2.25	4	0|0|0|0|0|0|0|0|0|0|0|0|0|0|0|0	0.96	0.99	0.96	0.99	0.96	2.98	22.5	0.01		TRUE								TRUE	Q4ZIN3	MBRL_HUMAN	Membralin (Transmembrane protein 259)	negative regulation of neuron death [GO:1901215]; positive regulation of ERAD pathway [GO:1904294]; response to endoplasmic reticulum stress [GO:0034976]	endoplasmic reticulum [GO:0005783]; endoplasmic reticulum membrane [GO:0005789]		TMEM259	Homo sapiens (Human)	620	67889	SUBCELLULAR LOCATION: Endoplasmic reticulum membrane {ECO:0000250|UniProtKB:Q8CIV2}; Multi-pass membrane protein {ECO:0000255}.
E : WT	Q5T9A4	Q5T9A4	4|3|10|8	25	6.25	4	1|0|2|0|0|0|0|0|1|2|0|2|0|0|0|0	0.92	1	0.92	1	0.92	1.19	12.5	0.01		TRUE	Q5T9A4	ATAD3B	5	1.875	16	68	23.5294	TRUE	Q5T9A4	ATD3B_HUMAN	ATPase family AAA domain-containing protein 3B (AAA-TOB3)	mitochondrion organization [GO:0007005]	ficolin-1-rich granule membrane [GO:0101003]; mitochondrial inner membrane [GO:0005743]; mitochondrion [GO:0005739]; plasma membrane [GO:0005886]; secretory granule membrane [GO:0030667]	ATP binding [GO:0005524]; ATP hydrolysis activity [GO:0016887]	ATAD3B	Homo sapiens (Human)	648	72573	SUBCELLULAR LOCATION: Mitochondrion inner membrane {ECO:0000269|PubMed:16909202, ECO:0000269|PubMed:18063578}; Peripheral membrane protein {ECO:0000269|PubMed:16909202, ECO:0000269|PubMed:18063578}. Note=Has been found to co-purify with nucleoids (PubMed:22453275). Since it does not face the mitochondrial matrix, the association with nucleoids could be mediated by ATAD3A. {ECO:0000269|PubMed:2245…
E : WT	Q6PI48	Q6PI48	5|9|7|10	31	7.75	4	0|0|0|1|1|1|1|2|1|1|0|0|1|0|0|0	0.99	1	0.99	1	0.99	3.76	13.78	0		TRUE	Q6PI48	DARS2	6	2.14286	28	68	41.1765	TRUE	Q6PI48	SYDM_HUMAN	Aspartate--tRNA ligase, mitochondrial (EC 6.1.1.12) (Aspartyl-tRNA synthetase) (AspRS)	aspartyl-tRNA aminoacylation [GO:0006422]; mitochondrial asparaginyl-tRNA aminoacylation [GO:0070145]; tRNA aminoacylation [GO:0043039]	mitochondrial matrix [GO:0005759]; mitochondrion [GO:0005739]; nucleoplasm [GO:0005654]	aspartate-tRNA ligase activity [GO:0004815]; aspartate-tRNA(Asn) ligase activity [GO:0050560]; ATP binding [GO:0005524]; protein homodimerization activity [GO:0042803]; tRNA binding [GO:0000049]	DARS2	Homo sapiens (Human)	645	73563	SUBCELLULAR LOCATION: Mitochondrion matrix {ECO:0000269|PubMed:15779907}.
E : WT	Q8NHP6	Q8NHP6	2|2|11|11	26	6.5	4	0|0|0|0|0|0|0|0|0|0|0|0|2|0|1|0	0.92	1	0.92	1	0.92	1.7	34.67	0.01		TRUE	Q8NHP6	MOSPD2	3	1.55556	9	68	13.2353	TRUE	Q8NHP6	MSPD2_HUMAN	Motile sperm domain-containing protein 2	chemotaxis [GO:0006935]; positive regulation of monocyte chemotaxis [GO:0090026]; positive regulation of neutrophil chemotaxis [GO:0090023]	endomembrane system [GO:0012505]; endoplasmic reticulum [GO:0005783]; endoplasmic reticulum membrane [GO:0005789]; endoplasmic reticulum-endosome membrane contact site [GO:0140284]; membrane [GO:0016020]; organelle membrane contact site [GO:0044232]; plasma membrane [GO:0005886]; specific granule membrane [GO:0035579]		MOSPD2	Homo sapiens (Human)	518	59746	SUBCELLULAR LOCATION: Endoplasmic reticulum membrane {ECO:0000269|PubMed:28137892, ECO:0000269|PubMed:29858488}; Single-pass type IV membrane protein {ECO:0000269|PubMed:29858488}. Note=Localization to contact sites involving the endoplasmic reticulum and several organelles is regulated by interaction with proteins containing FFAT motif. {ECO:0000269|PubMed:29858488}.
E : WT	Q9H2J7	Q9H2J7	5|2|6|5	18	4.5	4	0|0|0|0|0|0|0|0|0|0|0|0|0|1|1|1	0.96	1	0.96	1	0.96	1.8	24	0.01		TRUE	Q9H2J7	SLC6A15	3	1.28571	7	68	10.2941	TRUE	Q9H2J7	S6A15_HUMAN	Sodium-dependent neutral amino acid transporter B(0)AT2 (Sodium- and chloride-dependent neurotransmitter transporter NTT73) (Sodium-coupled branched-chain amino-acid transporter 1) (Solute carrier family 6 member 15) (Transporter v7-3)	amino acid transport [GO:0006865]; leucine transport [GO:0015820]; neurotransmitter transport [GO:0006836]; neutral amino acid transport [GO:0015804]; proline transport [GO:0015824]; sodium ion transmembrane transport [GO:0035725]	membrane [GO:0016020]; plasma membrane [GO:0005886]	amino acid transmembrane transporter activity [GO:0015171]; branched-chain amino acid:sodium symporter activity [GO:0015657]; neurotransmitter transmembrane transporter activity [GO:0005326]; neutral amino acid:sodium symporter activity [GO:0005295]; proline:sodium symporter activity [GO:0005298]	SLC6A15	Homo sapiens (Human)	730	81836	SUBCELLULAR LOCATION: Membrane {ECO:0000305|PubMed:16226721}; Multi-pass membrane protein {ECO:0000305}.
E : WT	Q9H8Y8	Q9H8Y8	11|7|12|18	48	12	4	1|2|1|0|0|0|0|0|0|2|2|1|1|6|2|3	0.97	1	0.97	1	0.97	1.97	9.14	0.01		TRUE	Q9H8Y8	GORASP2	6	2.16129	31	68	45.5882	TRUE	Q9H8Y8	GORS2_HUMAN	Golgi reassembly-stacking protein 2 (GRS2) (Golgi phosphoprotein 6) (GOLPH6) (Golgi reassembly-stacking protein of 55 kDa) (GRASP55) (p59)	cell differentiation [GO:0030154]; establishment of protein localization to plasma membrane [GO:0061951]; Golgi organization [GO:0007030]; organelle assembly [GO:0070925]; organelle organization [GO:0006996]; response to endoplasmic reticulum stress [GO:0034976]; spermatogenesis [GO:0007283]	cis-Golgi network [GO:0005801]; endoplasmic reticulum membrane [GO:0005789]; Golgi apparatus [GO:0005794]; Golgi membrane [GO:0000139]; membrane [GO:0016020]		GORASP2	Homo sapiens (Human)	452	47145	SUBCELLULAR LOCATION: Golgi apparatus membrane {ECO:0000269|PubMed:10487747, ECO:0000269|PubMed:11101516, ECO:0000269|PubMed:27062250}; Lipid-anchor {ECO:0000269|PubMed:11101516}. Endoplasmic reticulum membrane {ECO:0000269|PubMed:27062250}. Golgi apparatus {ECO:0000269|PubMed:28067262}. Note=Detected in the intermediate Golgi, membrane-associated (By similarity). ER stress triggers its relocaliz…
E : WT	Q9HBM0	Q9HBM0	4|7|24|28	63	15.75	4	0|1|0|0|0|0|0|0|0|0|1|0|2|1|0|0	1	1	1	1	1	4.28	50.4	0		TRUE	Q9HBM0	VEZT	3	1.46667	15	68	22.0588	TRUE	Q9HBM0	VEZA_HUMAN	Vezatin	cell-cell adhesion [GO:0098609]	acrosomal vesicle [GO:0001669]; adherens junction [GO:0005912]; cytosol [GO:0005829]; nucleoplasm [GO:0005654]; plasma membrane [GO:0005886]; stereocilia ankle link complex [GO:0002142]; stereocilium membrane [GO:0060171]	myosin binding [GO:0017022]	VEZT	Homo sapiens (Human)	779	88665	SUBCELLULAR LOCATION: Cell membrane {ECO:0000269|PubMed:15090598}; Multi-pass membrane protein {ECO:0000305}. Cell projection, stereocilium membrane {ECO:0000250|UniProtKB:Q3ZK22}. Cell junction, adherens junction {ECO:0000269|PubMed:15090598}. Nucleus {ECO:0000250|UniProtKB:Q3ZK22}. Cytoplasmic vesicle, secretory vesicle, acrosome {ECO:0000250|UniProtKB:Q3ZK22}.
E : WT	Q9NSE4	Q9NSE4	9|14|12|11	46	11.5	4	4|3|4|0|0|0|1|0|2|5|4|2|1|2|1|3	0.98	1	0.98	1	0.98	2.99	5.75	0		TRUE	Q9NSE4	IARS2	5	2.25	32	68	47.0588	TRUE	Q9NSE4	SYIM_HUMAN	Isoleucine--tRNA ligase, mitochondrial (EC 6.1.1.5) (Isoleucyl-tRNA synthetase) (IleRS)	isoleucyl-tRNA aminoacylation [GO:0006428]; mitochondrial translation [GO:0032543]; tRNA aminoacylation for protein translation [GO:0006418]	mitochondrial matrix [GO:0005759]; mitochondrion [GO:0005739]	aminoacyl-tRNA editing activity [GO:0002161]; ATP binding [GO:0005524]; isoleucine-tRNA ligase activity [GO:0004822]; tRNA binding [GO:0000049]	IARS2	Homo sapiens (Human)	1012	113792	SUBCELLULAR LOCATION: Mitochondrion matrix {ECO:0000250}.
E : WT	Q9NXE4	Q9NXE4	5|6|13|16	40	10	4	0|0|0|0|0|0|0|0|0|0|0|0|1|1|0|0	1	1	1	1	1	7.79	80	0		TRUE	Q9NXE4	SMPD4	12	2.7	20	68	29.4118	TRUE	Q9NXE4	NSMA3_HUMAN	Sphingomyelin phosphodiesterase 4 (EC 3.1.4.12) (Neutral sphingomyelinase 3) (nSMase-3) (nSMase3) (Neutral sphingomyelinase III)	cellular response to tumor necrosis factor [GO:0071356]; ceramide biosynthetic process [GO:0046513]; endoplasmic reticulum organization [GO:0007029]; glycerophospholipid catabolic process [GO:0046475]; sphingomyelin catabolic process [GO:0006685]	endoplasmic reticulum [GO:0005783]; endoplasmic reticulum membrane [GO:0005789]; Golgi apparatus [GO:0005794]; Golgi membrane [GO:0000139]; nuclear envelope [GO:0005635]; nuclear outer membrane [GO:0005640]; sarcolemma [GO:0042383]; trans-Golgi network [GO:0005802]	metal ion binding [GO:0046872]; sphingomyelin phosphodiesterase activity [GO:0004767]; sphingomyelin phosphodiesterase D activity [GO:0050290]	SMPD4	Homo sapiens (Human)	866	97810	SUBCELLULAR LOCATION: Endoplasmic reticulum membrane {ECO:0000269|PubMed:16517606, ECO:0000269|PubMed:18505924, ECO:0000269|PubMed:31495489}; Single-pass membrane protein {ECO:0000255}. Golgi apparatus membrane {ECO:0000269|PubMed:16517606}; Single-pass membrane protein {ECO:0000255}. Nucleus envelope {ECO:0000269|PubMed:31495489}. Cell membrane, sarcolemma {ECO:0000250|UniProtKB:Q6ZPR5}.
E : WT	Q9P0I2	Q9P0I2	3|2|6|7	18	4.5	4	1|0|1|0|0|0|0|0|0|2|1|0|1|0|0|0	0.89	1	0.89	1	0.89	0.55	12	0.02		TRUE	Q9P0I2	EMC3	6	1.45833	24	68	35.2941	TRUE	Q9P0I2	EMC3_HUMAN	ER membrane protein complex subunit 3 (Transmembrane protein 111)	protein insertion into ER membrane by stop-transfer membrane-anchor sequence [GO:0045050]; tail-anchored membrane protein insertion into ER membrane [GO:0071816]	EMC complex [GO:0072546]; endoplasmic reticulum membrane [GO:0005789]; membrane [GO:0016020]		EMC3	Homo sapiens (Human)	261	29952	SUBCELLULAR LOCATION: Endoplasmic reticulum membrane {ECO:0000269|PubMed:22119785}; Multi-pass membrane protein {ECO:0000269|PubMed:32439656}.
E : WT	Q9UIQ6	Q9UIQ6	5|2|4|4	15	3.75	4	0|0|0|0|0|0|0|0|0|0|0|0|0|0|0|0	0.99	1	0.99	1	0.99	2.98	37.5	0		TRUE	Q9UIQ6	LNPEP	2	1.125	8	68	11.7647	TRUE	Q9UIQ6	LCAP_HUMAN	Leucyl-cystinyl aminopeptidase (Cystinyl aminopeptidase) (EC 3.4.11.3) (Insulin-regulated membrane aminopeptidase) (Insulin-responsive aminopeptidase) (IRAP) (Oxytocinase) (OTase) (Placental leucine aminopeptidase) (P-LAP) [Cleaved into: Leucyl-cystinyl aminopeptidase, pregnancy serum form]	antigen processing and presentation of exogenous peptide antigen via MHC class I, TAP-independent [GO:0002480]; cell-cell signaling [GO:0007267]; female pregnancy [GO:0007565]; negative regulation of cold-induced thermogenesis [GO:0120163]; peptide catabolic process [GO:0043171]; protein catabolic process [GO:0030163]; protein polyubiquitination [GO:0000209]; proteolysis [GO:0006508]; regulation …	cytoplasm [GO:0005737]; cytoplasmic vesicle membrane [GO:0030659]; cytosol [GO:0005829]; early endosome lumen [GO:0031905]; extracellular region [GO:0005576]; lysosomal membrane [GO:0005765]; membrane [GO:0016020]; perinuclear region of cytoplasm [GO:0048471]; plasma membrane [GO:0005886]	aminopeptidase activity [GO:0004177]; metalloaminopeptidase activity [GO:0070006]; metallopeptidase activity [GO:0008237]; peptide binding [GO:0042277]; zinc ion binding [GO:0008270]	LNPEP	Homo sapiens (Human)	1025	117349	SUBCELLULAR LOCATION: Cell membrane {ECO:0000269|PubMed:11389728}; Single-pass type II membrane protein {ECO:0000269|PubMed:11389728}. Note=In brain only the membrane-bound form is found. The protein resides in intracellular vesicles together with GLUT4 and can then translocate to the cell surface in response to insulin and/or oxytocin. Localization may be determined by dileucine internalization …
E : WT	Q9Y287	Q9Y287	2|2|10|7	21	5.25	4	0|0|0|0|0|0|0|0|0|0|0|0|2|0|1|1	0.88	1	0.88	1	0.88	1.13	21	0.02		TRUE	Q9Y287	ITM2B	3	1.41667	12	68	17.6471	TRUE	Q9Y287	ITM2B_HUMAN	Integral membrane protein 2B (Immature BRI2) (imBRI2) (Protein E25B) (Transmembrane protein BRI) (Bri) [Cleaved into: BRI2, membrane form (Mature BRI2) (mBRI2); BRI2 intracellular domain (BRI2 ICD); BRI2C, soluble form; Bri23 peptide (Bri2-23) (ABri23) (C-terminal peptide) (P23 peptide)]	negative regulation of amyloid precursor protein biosynthetic process [GO:0042985]; nervous system development [GO:0007399]	endosome membrane [GO:0010008]; extracellular exosome [GO:0070062]; extracellular region [GO:0005576]; extracellular space [GO:0005615]; Golgi apparatus [GO:0005794]; Golgi membrane [GO:0000139]; Golgi-associated vesicle membrane [GO:0030660]; intracellular membrane-bounded organelle [GO:0043231]; membrane [GO:0016020]; organelle membrane [GO:0031090]; plasma membrane [GO:0005886]	amyloid-beta binding [GO:0001540]; ATP binding [GO:0005524]	ITM2B	Homo sapiens (Human)	266	30338	SUBCELLULAR LOCATION: [Integral membrane protein 2B]: Golgi apparatus membrane {ECO:0000269|PubMed:14656991, ECO:0000269|PubMed:19114711}; Single-pass type II membrane protein {ECO:0000269|PubMed:10526337}. Note=Immature BRI2 (imBRI2) is cleaved by furin in the Golgi into mBRI2 and a Bri23 peptide. mBRI2 is transported to the plasma membrane and Bri23 peptide is secreted.; SUBCELLULAR LOCATION: […
E : WT	Q9Y2Z4	Q9Y2Z4	10|9|8|8	35	8.75	4	1|3|1|4|4|4|3|2|3|2|3|1|1|0|0|0	0.98	1	0.98	1	0.98	3.22	4.38	0		TRUE	Q9Y2Z4	YARS2	4	1.36842	19	68	27.9412	TRUE	Q9Y2Z4	SYYM_HUMAN	Tyrosine--tRNA ligase, mitochondrial (EC 6.1.1.1) (Tyrosyl-tRNA synthetase) (TyrRS)	mitochondrial tyrosyl-tRNA aminoacylation [GO:0070184]; translation [GO:0006412]; tRNA aminoacylation [GO:0043039]	cytosol [GO:0005829]; mitochondrial matrix [GO:0005759]; mitochondrion [GO:0005739]; nuclear body [GO:0016604]	ATP binding [GO:0005524]; protein homodimerization activity [GO:0042803]; RNA binding [GO:0003723]; tRNA binding [GO:0000049]; tyrosine binding [GO:0072545]; tyrosine-tRNA ligase activity [GO:0004831]	YARS2	Homo sapiens (Human)	477	53199	SUBCELLULAR LOCATION: Mitochondrion matrix {ECO:0000269|PubMed:15779907}.
E : WT	Q9Y394	Q9Y394	5|7|8|11	31	7.75	4	0|0|0|0|0|0|0|0|0|0|0|0|0|0|0|0	1	1	1	1	1	8.25	77.5	0		TRUE	Q9Y394	DHRS7	4	2.5	10	68	14.7059	TRUE	Q9Y394	DHRS7_HUMAN	Dehydrogenase/reductase SDR family member 7 (EC 1.1.1.-) (Retinal short-chain dehydrogenase/reductase 4) (retSDR4) (Short chain dehydrogenase/reductase family 34C member 1) (Protein SDR34C1)		endoplasmic reticulum membrane [GO:0005789]; membrane [GO:0016020]	carbonyl reductase (NADPH) activity [GO:0004090]; NADP-retinol dehydrogenase activity [GO:0052650]; oxidoreductase activity, acting on the CH-OH group of donors, NAD or NADP as acceptor [GO:0016616]	DHRS7	Homo sapiens (Human)	339	38299	SUBCELLULAR LOCATION: Endoplasmic reticulum membrane {ECO:0000269|PubMed:24246760, ECO:0000269|PubMed:28457967}. Note=Bound to the endoplasmic reticulum membrane, possibly through a N-terminus anchor. The main bulk of the polypeptide chain was first reported to be facing toward the lumen of the endoplasmic reticulum (PubMed:24246760). However, it was later shown to be facing the cytosol (PubMed:2…
E : WT	Q9Y606	Q9Y606	6|8|5|4	23	5.75	4	0|0|0|1|2|1|2|1|0|1|2|0|0|0|0|0	0.98	1	0.98	1	0.98	2.67	9.2	0		TRUE	Q9Y606	PUS1	5	1.71429	21	68	30.8824	TRUE	Q9Y606	PUS1_HUMAN	Pseudouridylate synthase 1 homolog (EC 5.4.99.-) (tRNA pseudouridine synthase 1) (EC 5.4.99.12) (tRNA pseudouridine(38-40) synthase) (tRNA pseudouridylate synthase I) (tRNA-uridine isomerase I)	mitochondrial tRNA pseudouridine synthesis [GO:0070902]; mRNA processing [GO:0006397]; mRNA pseudouridine synthesis [GO:1990481]; RNA splicing [GO:0008380]; tRNA pseudouridine synthesis [GO:0031119]	cytoplasm [GO:0005737]; mitochondrial matrix [GO:0005759]; mitochondrion [GO:0005739]; nucleoplasm [GO:0005654]; nucleus [GO:0005634]	pseudouridine synthase activity [GO:0009982]; RNA binding [GO:0003723]; steroid receptor RNA activator RNA binding [GO:0002153]; tRNA binding [GO:0000049]; tRNA pseudouridine synthase activity [GO:0106029]	PUS1	Homo sapiens (Human)	427	47470	SUBCELLULAR LOCATION: [Isoform 1]: Mitochondrion {ECO:0000269|PubMed:17056637, ECO:0000305|PubMed:15772074}.; SUBCELLULAR LOCATION: [Isoform 2]: Nucleus {ECO:0000269|PubMed:17056637, ECO:0000305|PubMed:15772074}. Cytoplasm {ECO:0000305|PubMed:15772074}.
N : D377Y	O00411	O00411	11|7|9|11	38	9.5	4	0|0|0|0|0|0|0|0|0|0|0|0|0|0|0|0	1	1	1	1	1	11.49	95	0		TRUE	O00411	POLRMT	23	8.16667	6	68	8.82353	TRUE	O00411	RPOM_HUMAN	DNA-directed RNA polymerase, mitochondrial (MtRPOL) (EC 2.7.7.6)	mitochondrial transcription [GO:0006390]; transcription initiation at mitochondrial promoter [GO:0006391]	mitochondrial DNA-directed RNA polymerase complex [GO:0034245]; mitochondrial matrix [GO:0005759]; mitochondrial nucleoid [GO:0042645]; mitochondrion [GO:0005739]; protein-containing complex [GO:0032991]	3'-5'-exoribonuclease activity [GO:0000175]; DNA primase activity [GO:0003896]; DNA-directed 5'-3' RNA polymerase activity [GO:0003899]; mitochondrial promoter sequence-specific DNA binding [GO:0001018]; RNA binding [GO:0003723]; sequence-specific DNA binding [GO:0043565]	POLRMT	Homo sapiens (Human)	1230	138620	SUBCELLULAR LOCATION: Mitochondrion {ECO:0000269|PubMed:23283301, ECO:0000269|PubMed:29445193}.
N : D377Y	O43824	O43824	1|4|5|5	15	3.75	4	0|0|0|0|0|0|0|0|0|0|0|0|0|0|0|0	0.75	1	0.75	1	0.75	0.95	37.5	0.04		TRUE	O43824	GTPBP6	1	1	5	68	7.35294	TRUE	O43824	GTPB6_HUMAN	Putative GTP-binding protein 6 (Pseudoautosomal GTP-binding protein-like)		cytoplasm [GO:0005737]	GTP binding [GO:0005525]; metal ion binding [GO:0046872]; ribosome binding [GO:0043022]	GTPBP6	Homo sapiens (Human)	516	56897
N : D377Y	O75027	O75027	5|6|8|3	22	5.5	4	1|1|0|0|1|2|0|0|0|0|1|0|0|0|0|0	0.98	1	0.98	1	0.98	2.54	14.67	0		TRUE	O75027	ABCB7	4	1.68182	22	68	32.3529	TRUE	O75027	ABCB7_HUMAN	Iron-sulfur clusters transporter ABCB7, mitochondrial (ATP-binding cassette sub-family B member 7, mitochondrial) (ATP-binding cassette transporter 7) (ABC transporter 7 protein)	cellular iron ion homeostasis [GO:0006879]; iron ion homeostasis [GO:0055072]; iron ion transmembrane transport [GO:0034755]; iron-sulfur cluster assembly [GO:0016226]; iron-sulfur cluster export from the mitochondrion [GO:0140466]; negative regulation of reactive oxygen species biosynthetic process [GO:1903427]; positive regulation of heme biosynthetic process [GO:0070455]; positive regulation o…	membrane [GO:0016020]; mitochondrial inner membrane [GO:0005743]; mitochondrion [GO:0005739]	ABC-type iron-sulfur cluster transporter activity [GO:0140481]; ATP binding [GO:0005524]; ATPase-coupled transmembrane transporter activity [GO:0042626]; heme transmembrane transporter activity [GO:0015232]; protein homodimerization activity [GO:0042803]	ABCB7	Homo sapiens (Human)	752	82641	SUBCELLULAR LOCATION: Mitochondrion inner membrane {ECO:0000250|UniProtKB:P40416}; Multi-pass membrane protein {ECO:0000250|UniProtKB:P40416}.
N : D377Y	O95470	O95470	8|9|16|16	49	12.25	4	2|2|2|3|0|3|4|2|4|2|0|2|0|0|0|0	0.99	1	0.99	1	0.99	3.22	7.54	0		TRUE	O95470	SGPL1	7	2.83333	30	68	44.1176	TRUE	O95470	SGPL1_HUMAN	Sphingosine-1-phosphate lyase 1 (S1PL) (SP-lyase 1) (SPL 1) (hSPL) (EC 4.1.2.27) (Sphingosine-1-phosphate aldolase)	androgen metabolic process [GO:0008209]; apoptotic signaling pathway [GO:0097190]; ceramide metabolic process [GO:0006672]; estrogen metabolic process [GO:0008210]; face morphogenesis [GO:0060325]; fatty acid metabolic process [GO:0006631]; fibroblast migration [GO:0010761]; hemopoiesis [GO:0030097]; kidney development [GO:0001822]; Leydig cell differentiation [GO:0033327]; luteinization [GO:0001…	endoplasmic reticulum [GO:0005783]; endoplasmic reticulum membrane [GO:0005789]	pyridoxal phosphate binding [GO:0030170]; sphinganine-1-phosphate aldolase activity [GO:0008117]	SGPL1	Homo sapiens (Human)	568	63524	SUBCELLULAR LOCATION: Endoplasmic reticulum membrane {ECO:0000269|PubMed:14570870}; Single-pass type III membrane protein {ECO:0000255}; Cytoplasmic side {ECO:0000250|UniProtKB:Q8R0X7}.
N : D377Y	P27448	P27448	4|6|11|10	31	7.75	4	2|0|4|1|1|1|0|0|0|2|2|3|1|3|0|0	0.85	1	0.85	1	0.85	-0.01	6.2	0.03		TRUE	P27448	MARK3	4	1.94118	17	68	25	TRUE	P27448	MARK3_HUMAN	MAP/microtubule affinity-regulating kinase 3 (EC 2.7.11.1) (C-TAK1) (cTAK1) (Cdc25C-associated protein kinase 1) (ELKL motif kinase 2) (EMK-2) (Protein kinase STK10) (Ser/Thr protein kinase PAR-1) (Par-1a) (Serine/threonine-protein kinase p78)	intracellular signal transduction [GO:0035556]; microtubule cytoskeleton organization [GO:0000226]; negative regulation of hippo signaling [GO:0035331]; peptidyl-serine autophosphorylation [GO:0036289]; peptidyl-serine phosphorylation [GO:0018105]; positive regulation of protein binding [GO:0032092]; protein phosphorylation [GO:0006468]	cytoplasm [GO:0005737]; cytosol [GO:0005829]; dendrite [GO:0030425]; extracellular exosome [GO:0070062]; plasma membrane [GO:0005886]	ATP binding [GO:0005524]; protein serine kinase activity [GO:0106310]; protein serine/threonine kinase activity [GO:0004674]; tau protein binding [GO:0048156]; tau-protein kinase activity [GO:0050321]	MARK3	Homo sapiens (Human)	753	84429	SUBCELLULAR LOCATION: Cell membrane {ECO:0000269|PubMed:21145462}; Peripheral membrane protein {ECO:0000269|PubMed:21145462}. Cell projection, dendrite {ECO:0000269|PubMed:23666762}. Cytoplasm {ECO:0000269|PubMed:23666762}.
N : D377Y	P38935	P38935	2|3|2|2	9	2.25	4	0|0|0|0|0|0|0|0|0|1|0|0|0|0|0|0	0.96	0.99	0.96	0.99	0.96	2.98	22.5	0.01		TRUE								TRUE	P38935	SMBP2_HUMAN	DNA-binding protein SMUBP-2 (EC 3.6.4.12) (EC 3.6.4.13) (ATP-dependent helicase IGHMBP2) (Glial factor 1) (GF-1) (Immunoglobulin mu-binding protein 2)	DNA duplex unwinding [GO:0032508]; RNA secondary structure unwinding [GO:0010501]	axon [GO:0030424]; cytoplasm [GO:0005737]; growth cone [GO:0030426]; membrane [GO:0016020]; nuclear body [GO:0016604]; nucleoplasm [GO:0005654]; nucleus [GO:0005634]; ribonucleoprotein complex [GO:1990904]	5'-3' DNA helicase activity [GO:0043139]; 5'-3' RNA helicase activity [GO:0032574]; ATP binding [GO:0005524]; ATP hydrolysis activity [GO:0016887]; ATP-dependent activity, acting on DNA [GO:0008094]; ATP-dependent activity, acting on RNA [GO:0008186]; DNA binding [GO:0003677]; DNA helicase activity [GO:0003678]; double-stranded DNA helicase activity [GO:0036121]; identical protein binding [GO:004…	IGHMBP2	Homo sapiens (Human)	993	109149	SUBCELLULAR LOCATION: Nucleus {ECO:0000269|PubMed:19299493}. Cytoplasm {ECO:0000269|PubMed:19299493}. Cell projection, axon {ECO:0000250|UniProtKB:P40694}.
N : D377Y	P59045	P59045	2|2|3|3	10	2.5	4	0|0|0|0|0|0|0|0|0|0|0|0|0|0|0|0	0.97	0.99	0.97	0.99	0.97	2.98	25	0.01		TRUE								TRUE	P59045	NAL11_HUMAN	NACHT, LRR and PYD domains-containing protein 11 (Nucleotide-binding oligomerization domain protein 17) (PAAD-and NACHT domain-containing protein 10) (PYRIN-containing APAF1-like protein 6)	regulation of inflammatory response [GO:0050727]	cytoplasm [GO:0005737]	ATP binding [GO:0005524]; oxidoreductase activity, acting on paired donors, with incorporation or reduction of molecular oxygen, reduced ascorbate as one donor, and incorporation of one atom of oxygen [GO:0016715]; RNA binding [GO:0003723]	NLRP11	Homo sapiens (Human)	1033	117779
N : D377Y	P61586	P61586	5|6|4|5	20	5	4	0|0|0|0|0|0|0|0|0|0|0|0|4|1|1|1	0.92	0.96	0.92	0.96	0.92	1.94	11.43	0.01		TRUE	P61586	RHOA	2	1.21212	33	68	48.5294	TRUE	P61586	RHOA_HUMAN	Transforming protein RhoA (EC 3.6.5.2) (Rho cDNA clone 12) (h12)	actin cytoskeleton organization [GO:0030036]; actin cytoskeleton reorganization [GO:0031532]; actin filament organization [GO:0007015]; alpha-beta T cell lineage commitment [GO:0002363]; androgen receptor signaling pathway [GO:0030521]; angiotensin-mediated vasoconstriction involved in regulation of systemic arterial blood pressure [GO:0001998]; apical junction assembly [GO:0043297]; apolipoprote…	apical junction complex [GO:0043296]; axon [GO:0030424]; cell cortex [GO:0005938]; cell junction [GO:0030054]; cell periphery [GO:0071944]; cell projection [GO:0042995]; cleavage furrow [GO:0032154]; cytoplasmic vesicle [GO:0031410]; cytoskeleton [GO:0005856]; cytosol [GO:0005829]; dendritic spine [GO:0043197]; endoplasmic reticulum membrane [GO:0005789]; endosome [GO:0005768]; extracellular exos…	G protein activity [GO:0003925]; GDP binding [GO:0019003]; GTP binding [GO:0005525]; GTPase activity [GO:0003924]; myosin binding [GO:0017022]; protein domain specific binding [GO:0019904]; protein kinase binding [GO:0019901]; Rho GDP-dissociation inhibitor binding [GO:0051022]	RHOA	Homo sapiens (Human)	193	21768	SUBCELLULAR LOCATION: Cell membrane; Lipid-anchor; Cytoplasmic side. Cytoplasm, cytoskeleton. Cleavage furrow. Cytoplasm, cell cortex {ECO:0000269|PubMed:9635436}. Midbody. Cell projection, lamellipodium {ECO:0000250|UniProtKB:Q9QUI0}. Cell projection, dendrite {ECO:0000250|UniProtKB:Q9QUI0}. Nucleus {ECO:0000269|PubMed:12551911}. Note=Localized to cell-cell contacts in calcium-treated keratinocy…
N : D377Y	Q5T9A4	Q5T9A4	8|9|8|9	34	8.5	4	1|0|2|0|0|0|0|0|1|2|0|2|0|0|0|0	1	1	1	1	1	7.45	17	0		TRUE	Q5T9A4	ATAD3B	5	1.875	16	68	23.5294	TRUE	Q5T9A4	ATD3B_HUMAN	ATPase family AAA domain-containing protein 3B (AAA-TOB3)	mitochondrion organization [GO:0007005]	ficolin-1-rich granule membrane [GO:0101003]; mitochondrial inner membrane [GO:0005743]; mitochondrion [GO:0005739]; plasma membrane [GO:0005886]; secretory granule membrane [GO:0030667]	ATP binding [GO:0005524]; ATP hydrolysis activity [GO:0016887]	ATAD3B	Homo sapiens (Human)	648	72573	SUBCELLULAR LOCATION: Mitochondrion inner membrane {ECO:0000269|PubMed:16909202, ECO:0000269|PubMed:18063578}; Peripheral membrane protein {ECO:0000269|PubMed:16909202, ECO:0000269|PubMed:18063578}. Note=Has been found to co-purify with nucleoids (PubMed:22453275). Since it does not face the mitochondrial matrix, the association with nucleoids could be mediated by ATAD3A. {ECO:0000269|PubMed:2245…
N : D377Y	Q6IQ22	Q6IQ22	2|5|2|2	11	2.75	4	0|0|0|0|0|0|0|0|0|0|0|0|0|0|0|0	0.96	1	0.96	1	0.96	2.98	27.5	0.01		TRUE	Q6IQ22	RAB12	2	1.25	4	68	5.88235	TRUE	Q6IQ22	RAB12_HUMAN	Ras-related protein Rab-12	autophagy [GO:0006914]; cellular response to insulin stimulus [GO:0032869]; endosome to lysosome transport [GO:0008333]; protein catabolic process [GO:0030163]; protein localization to plasma membrane [GO:0072659]; protein secretion [GO:0009306]; Rab protein signal transduction [GO:0032482]; regulation of exocytosis [GO:0017157]; vesicle docking involved in exocytosis [GO:0006904]	autophagosome [GO:0005776]; cytosol [GO:0005829]; endosome [GO:0005768]; Golgi apparatus [GO:0005794]; Golgi membrane [GO:0000139]; insulin-responsive compartment [GO:0032593]; intracellular membrane-bounded organelle [GO:0043231]; lysosomal membrane [GO:0005765]; lysosome [GO:0005764]; plasma membrane [GO:0005886]; recycling endosome [GO:0055037]; recycling endosome membrane [GO:0055038]; synapt…	GDP binding [GO:0019003]; GTP binding [GO:0005525]; GTPase activity [GO:0003924]	RAB12	Homo sapiens (Human)	244	27248	SUBCELLULAR LOCATION: Recycling endosome membrane {ECO:0000250|UniProtKB:P35283}; Lipid-anchor {ECO:0000305}; Cytoplasmic side {ECO:0000305}. Lysosome membrane {ECO:0000250|UniProtKB:P35283}; Lipid-anchor {ECO:0000305}; Cytoplasmic side {ECO:0000305}. Golgi apparatus membrane {ECO:0000250|UniProtKB:P51152}. Cytoplasmic vesicle, autophagosome {ECO:0000250|UniProtKB:P35283}.
N : D377Y	Q7L0Y3	Q7L0Y3	16|17|24|25	82	20.5	4	6|4|6|8|5|9|7|8|6|7|4|5|0|0|1|1	0.94	1	0.94	1	0.94	1.7	4.26	0.01		TRUE	Q7L0Y3	TRMT10C	13	4.27273	33	68	48.5294	TRUE	Q7L0Y3	TM10C_HUMAN	tRNA methyltransferase 10 homolog C (HBV pre-S2 trans-regulated protein 2) (Mitochondrial ribonuclease P protein 1) (Mitochondrial RNase P protein 1) (RNA (guanine-9-)-methyltransferase domain-containing protein 1) (Renal carcinoma antigen NY-REN-49) (mRNA methyladenosine-N(1)-methyltransferase) (EC 2.1.1.-) (tRNA (adenine(9)-N(1))-methyltransferase) (EC 2.1.1.218) (tRNA (guanine(9)-N(1))-methylt…	mitochondrial RNA 5'-end processing [GO:0000964]; mitochondrial tRNA 3'-end processing [GO:1990180]; mitochondrial tRNA 5'-end processing [GO:0097745]; mitochondrial tRNA methylation [GO:0070901]; mitochondrial tRNA processing [GO:0090646]; mRNA methylation [GO:0080009]; positive regulation of mitochondrial translation [GO:0070131]	mitochondrial matrix [GO:0005759]; mitochondrial nucleoid [GO:0042645]; mitochondrial ribonuclease P complex [GO:0030678]; mitochondrion [GO:0005739]; nucleoplasm [GO:0005654]; nucleus [GO:0005634]; tRNA methyltransferase complex [GO:0043527]	identical protein binding [GO:0042802]; mRNA (adenine-N1-)-methyltransferase activity [GO:0061953]; RNA binding [GO:0003723]; tRNA (adenine-N1-)-methyltransferase activity [GO:0016429]; tRNA (guanine(9)-N(1))-methyltransferase activity [GO:0052905]; tRNA (guanine-N1-)-methyltransferase activity [GO:0009019]; tRNA binding [GO:0000049]	TRMT10C	Homo sapiens (Human)	403	47347	SUBCELLULAR LOCATION: Mitochondrion matrix, mitochondrion nucleoid {ECO:0000269|PubMed:18984158, ECO:0000269|PubMed:23473034, ECO:0000269|PubMed:24703694}.
N : D377Y	Q7LGA3	Q7LGA3	4|3|3|3	13	3.25	4	0|0|0|0|0|0|0|0|0|0|0|0|0|0|0|0	0.99	1	0.99	1	0.99	4.83	32.5	0		TRUE	Q7LGA3	HS2ST1	2	1.2	5	68	7.35294	TRUE	Q7LGA3	HS2ST_HUMAN	Heparan sulfate 2-O-sulfotransferase 1 (2-O-sulfotransferase) (2OST) (EC 2.8.2.-)	gene expression [GO:0010467]; heparan sulfate proteoglycan biosynthetic process [GO:0015012]; heparan sulfate proteoglycan biosynthetic process, enzymatic modification [GO:0015015]; heparan sulfate proteoglycan biosynthetic process, polysaccharide chain biosynthetic process [GO:0015014]; heparin metabolic process [GO:0030202]; ureteric bud formation [GO:0060676]	Golgi membrane [GO:0000139]; membrane [GO:0016020]	heparan sulfate 2-O-sulfotransferase activity [GO:0004394]; sulfotransferase activity [GO:0008146]	HS2ST1	Homo sapiens (Human)	356	41881	SUBCELLULAR LOCATION: Golgi apparatus membrane {ECO:0000250}; Single-pass type II membrane protein {ECO:0000250}.
N : D377Y	Q8IV48	Q8IV48	2|3|4|3	12	3	4	0|0|0|0|0|0|0|0|0|0|0|0|0|0|0|0	0.98	1	0.98	1	0.98	2.98	30	0		TRUE	Q8IV48	ERI1	3	1.71429	7	68	10.2941	TRUE	Q8IV48	ERI1_HUMAN	3'-5' exoribonuclease 1 (EC 3.1.-.-) (3'-5' exonuclease ERI1) (Eri-1 homolog) (Histone mRNA 3'-end-specific exoribonuclease) (Histone mRNA 3'-exonuclease 1) (Protein 3'hExo) (HEXO)	exonucleolytic trimming to generate mature 3'-end of 5.8S rRNA from tricistronic rRNA transcript (SSU-rRNA, 5.8S rRNA, LSU-rRNA) [GO:0000467]; RNA-mediated gene silencing [GO:0031047]; rRNA 3'-end processing [GO:0031125]	cytoplasm [GO:0005737]; histone pre-mRNA 3'end processing complex [GO:0071204]; nucleolus [GO:0005730]; nucleus [GO:0005634]	3'-5' exonuclease activity [GO:0008408]; 3'-5'-exoribonuclease activity [GO:0000175]; histone pre-mRNA stem-loop binding [GO:0071207]; metal ion binding [GO:0046872]; ribosome binding [GO:0043022]; rRNA binding [GO:0019843]	ERI1	Homo sapiens (Human)	349	40064	SUBCELLULAR LOCATION: Cytoplasm {ECO:0000269|PubMed:16912046}. Nucleus {ECO:0000269|PubMed:16912046}. Nucleus, nucleolus {ECO:0000269|PubMed:16912046}.
N : D377Y	Q8N8A6	Q8N8A6	20|29|21|21	91	22.75	4	0|0|1|1|1|0|0|0|0|0|1|1|0|0|0|1	1	1	1	1	1	27.17	60.67	0		TRUE	Q8N8A6	DDX51	16	4.57895	19	68	27.9412	TRUE	Q8N8A6	DDX51_HUMAN	ATP-dependent RNA helicase DDX51 (EC 3.6.4.13) (DEAD box protein 51)	rRNA processing [GO:0006364]	membrane [GO:0016020]; nucleolus [GO:0005730]; nucleus [GO:0005634]	ATP binding [GO:0005524]; ATP hydrolysis activity [GO:0016887]; RNA binding [GO:0003723]; RNA helicase activity [GO:0003724]	DDX51	Homo sapiens (Human)	666	72457	SUBCELLULAR LOCATION: Nucleus, nucleolus {ECO:0000250}.
N : D377Y	Q8NEJ9	Q8NEJ9	7|8|6|7	28	7	4	0|0|0|0|0|0|0|0|0|0|0|0|0|0|0|0	1	1	1	1	1	9.89	70	0		TRUE	Q8NEJ9	NGDN	8	3.42857	7	68	10.2941	TRUE	Q8NEJ9	NGDN_HUMAN	Neuroguidin (Centromere accumulated nuclear protein 1) (CANu1) (EIF4E-binding protein)	maturation of SSU-rRNA from tricistronic rRNA transcript (SSU-rRNA, 5.8S rRNA, LSU-rRNA) [GO:0000462]; postsynaptic modulation of chemical synaptic transmission [GO:0099170]; regulation of translation at postsynapse [GO:0140245]	axon [GO:0030424]; chromosome, centromeric region [GO:0000775]; dendrite [GO:0030425]; filopodium [GO:0030175]; glutamatergic synapse [GO:0098978]; mitochondrion [GO:0005739]; nucleolus [GO:0005730]; nucleoplasm [GO:0005654]; perforant pathway to dendrate granule cell synapse [GO:0140240]; postsynapse [GO:0098794]; small-subunit processome [GO:0032040]	RNA binding [GO:0003723]; translation regulator activity [GO:0045182]	NGDN	Homo sapiens (Human)	315	35894	SUBCELLULAR LOCATION: Nucleus {ECO:0000250}. Nucleus, nucleolus {ECO:0000269|PubMed:18547334}. Chromosome, centromere {ECO:0000269|PubMed:18547334}. Cytoplasm {ECO:0000250}. Cell projection, axon {ECO:0000250}. Cell projection, dendrite {ECO:0000250}. Cell projection, filopodium {ECO:0000250}. Note=Detected in axons, dendrites and filopodia. Colocalized with EIF4E in neurites (By similarity). Tra…
N : D377Y	Q96EU6	Q96EU6	3|2|2|3	10	2.5	4	0|0|0|1|0|1|0|0|0|0|0|0|0|0|0|0	0.96	0.99	0.96	0.99	0.96	2.59	20	0.01		TRUE	Q96EU6	RRP36	2	1.33333	9	68	13.2353	TRUE	Q96EU6	RRP36_HUMAN	Ribosomal RNA processing protein 36 homolog	cleavage involved in rRNA processing [GO:0000469]; maturation of SSU-rRNA from tricistronic rRNA transcript (SSU-rRNA, 5.8S rRNA, LSU-rRNA) [GO:0000462]; ribosomal small subunit biogenesis [GO:0042274]; rRNA processing [GO:0006364]	90S preribosome [GO:0030686]; nucleolus [GO:0005730]; nucleoplasm [GO:0005654]	RNA binding [GO:0003723]	RRP36	Homo sapiens (Human)	259	29823	SUBCELLULAR LOCATION: Nucleus, nucleolus {ECO:0000269|PubMed:20038530}. Note=Concentrated in the fibrillar region of the nucleolus.
N : D377Y	Q9BUN8	Q9BUN8	2|4|2|3	11	2.75	4	0|0|0|0|0|0|0|0|0|0|0|0|0|0|0|0	0.97	1	0.97	1	0.97	2.98	27.5	0		TRUE	Q9BUN8	DERL1	5	2.4	5	68	7.35294	TRUE	Q9BUN8	DERL1_HUMAN	Derlin-1 (Degradation in endoplasmic reticulum protein 1) (DERtrin-1) (Der1-like protein 1)	endoplasmic reticulum unfolded protein response [GO:0030968]; ER-associated misfolded protein catabolic process [GO:0071712]; ERAD pathway [GO:0036503]; establishment of protein localization [GO:0045184]; positive regulation of protein binding [GO:0032092]; positive regulation of protein ubiquitination [GO:0031398]; protein destabilization [GO:0031648]; response to unfolded protein [GO:0006986]; …	Derlin-1 retrotranslocation complex [GO:0036513]; Derlin-1-VIMP complex [GO:0036502]; early endosome [GO:0005769]; endoplasmic reticulum [GO:0005783]; endoplasmic reticulum membrane [GO:0005789]; endoplasmic reticulum quality control compartment [GO:0044322]; Hrd1p ubiquitin ligase ERAD-L complex [GO:0000839]; late endosome [GO:0005770]; membrane [GO:0016020]	ATPase binding [GO:0051117]; identical protein binding [GO:0042802]; MHC class I protein binding [GO:0042288]; misfolded protein binding [GO:0051787]; protease binding [GO:0002020]; protein-containing complex binding [GO:0044877]; signal recognition particle binding [GO:0005047]; signaling receptor activity [GO:0038023]; ubiquitin protein ligase binding [GO:0031625]; ubiquitin-specific protease b…	DERL1	Homo sapiens (Human)	251	28801	SUBCELLULAR LOCATION: Endoplasmic reticulum membrane {ECO:0000269|PubMed:15215855, ECO:0000269|PubMed:15215856, ECO:0000269|PubMed:16186509, ECO:0000269|PubMed:16449189}; Multi-pass membrane protein {ECO:0000269|PubMed:15215855, ECO:0000269|PubMed:15215856, ECO:0000269|PubMed:16186509, ECO:0000269|PubMed:16449189}.
N : D377Y	Q9BXS6	Q9BXS6	6|3|7|13	29	7.25	4	0|1|0|3|0|3|0|1|1|2|1|0|0|0|0|0	0.88	1	0.88	1	0.88	0.3	9.67	0.02		TRUE	Q9BXS6	NUSAP1	10	2.32	25	68	36.7647	TRUE	Q9BXS6	NUSAP_HUMAN	Nucleolar and spindle-associated protein 1 (NuSAP)	establishment of mitotic spindle localization [GO:0040001]; mitotic chromosome condensation [GO:0007076]; mitotic cytokinesis [GO:0000281]; mitotic sister chromatid segregation [GO:0000070]; positive regulation of mitotic nuclear division [GO:0045840]	chromosome [GO:0005694]; cytoplasm [GO:0005737]; microtubule [GO:0005874]; mitotic spindle [GO:0072686]; nucleolus [GO:0005730]	DNA binding [GO:0003677]; microtubule binding [GO:0008017]; RNA binding [GO:0003723]	NUSAP1	Homo sapiens (Human)	441	49452	SUBCELLULAR LOCATION: Cytoplasm {ECO:0000250}. Nucleus, nucleolus {ECO:0000250}. Cytoplasm, cytoskeleton, spindle {ECO:0000250}. Chromosome {ECO:0000250}. Note=Found in the cytoplasm and nucleolus during interphase and redistributes to the mitotic spindle in prometaphase (By similarity). Localizes to the mitotic spindle during anaphase and telophase then disappears from around the chromosomes dur…
N : D377Y	Q9H0U3	Q9H0U3	4|4|4|5	17	4.25	4	1|0|1|0|1|0|0|1|1|0|1|1|0|0|0|1	0.95	0.98	0.95	0.98	0.95	2.68	8.5	0.01		TRUE	Q9H0U3	MAGT1	3	1.11765	17	68	25	TRUE	Q9H0U3	MAGT1_HUMAN	Magnesium transporter protein 1 (MagT1) (Dolichyl-diphosphooligosaccharide--protein glycosyltransferase subunit MAGT1) (Oligosaccharyl transferase subunit MAGT1) (Implantation-associated protein) (IAP)	cognition [GO:0050890]; magnesium ion transport [GO:0015693]; protein N-linked glycosylation [GO:0006487]; protein N-linked glycosylation via asparagine [GO:0018279]; transmembrane transport [GO:0055085]	azurophil granule membrane [GO:0035577]; endoplasmic reticulum [GO:0005783]; endoplasmic reticulum membrane [GO:0005789]; membrane [GO:0016020]; oligosaccharyltransferase complex [GO:0008250]; plasma membrane [GO:0005886]	magnesium ion transmembrane transporter activity [GO:0015095]	MAGT1	Homo sapiens (Human)	335	38037	SUBCELLULAR LOCATION: Cell membrane {ECO:0000269|PubMed:19717468}; Multi-pass membrane protein {ECO:0000269|PubMed:19717468}. Endoplasmic reticulum {ECO:0000269|PubMed:25135935}. Endoplasmic reticulum membrane {ECO:0000250}; Multi-pass membrane protein {ECO:0000250}.
N : D377Y	Q9H8V3	Q9H8V3	2|2|4|2	10	2.5	4	0|0|0|0|0|0|0|0|0|0|0|0|0|1|0|1	0.95	1	0.95	1	0.95	2.59	20	0.01		TRUE	Q9H8V3	ECT2	13	2.81818	11	68	16.1765	TRUE	Q9H8V3	ECT2_HUMAN	Protein ECT2 (Epithelial cell-transforming sequence 2 oncogene)	activation of GTPase activity [GO:0090630]; activation of protein kinase activity [GO:0032147]; bicellular tight junction assembly [GO:0070830]; cell differentiation [GO:0030154]; cell morphogenesis [GO:0000902]; cellular response to calcium ion [GO:0071277]; cellular response to hydrogen peroxide [GO:0070301]; cellular response to ionizing radiation [GO:0071479]; intracellular signal transductio…	bicellular tight junction [GO:0005923]; cell cortex [GO:0005938]; cell-cell junction [GO:0005911]; centralspindlin complex [GO:0097149]; cleavage furrow [GO:0032154]; cytoplasm [GO:0005737]; cytosol [GO:0005829]; microtubule organizing center [GO:0005815]; midbody [GO:0030496]; mitotic spindle [GO:0072686]; nuclear body [GO:0016604]; nucleoplasm [GO:0005654]; nucleus [GO:0005634]	GTPase activator activity [GO:0005096]; guanyl-nucleotide exchange factor activity [GO:0005085]; protein homodimerization activity [GO:0042803]; small GTPase binding [GO:0031267]	ECT2	Homo sapiens (Human)	914	103505	SUBCELLULAR LOCATION: Nucleus {ECO:0000269|PubMed:10579713, ECO:0000269|PubMed:14645260, ECO:0000269|PubMed:15254234, ECO:0000269|PubMed:16103226, ECO:0000269|PubMed:16495035, ECO:0000269|PubMed:19617897}. Cytoplasm {ECO:0000269|PubMed:10579713, ECO:0000269|PubMed:16236794, ECO:0000269|PubMed:16394104}. Cytoplasm, cytoskeleton, spindle {ECO:0000269|PubMed:10579713, ECO:0000269|PubMed:16103226, EC…
N : D377Y	Q9NRZ9	Q9NRZ9	8|11|13|11	43	10.75	4	2|1|1|5|7|7|3|3|2|2|1|1|0|1|0|0	0.87	0.97	0.87	0.97	0.87	0.69	4.78	0.02		TRUE	Q9NRZ9	HELLS	27	3.54839	31	68	45.5882	TRUE	Q9NRZ9	HELLS_HUMAN	Lymphoid-specific helicase (EC 3.6.4.-) (Proliferation-associated SNF2-like protein) (SWI/SNF2-related matrix-associated actin-dependent regulator of chromatin subfamily A member 6)	apoptotic process [GO:0006915]; cell cycle [GO:0007049]; cell division [GO:0051301]; cellular response to leukemia inhibitory factor [GO:1990830]; DNA methylation [GO:0006306]; DNA methylation-dependent heterochromatin formation [GO:0006346]; kidney development [GO:0001822]; lymphocyte proliferation [GO:0046651]; maintenance of DNA methylation [GO:0010216]; negative regulation of intrinsic apopto…	chromosome, centromeric region [GO:0000775]; nucleus [GO:0005634]; pericentric heterochromatin [GO:0005721]	ATP binding [GO:0005524]; ATP-dependent chromatin remodeler activity [GO:0140658]; chromatin binding [GO:0003682]; helicase activity [GO:0004386]; hydrolase activity [GO:0016787]	HELLS	Homo sapiens (Human)	838	97074	SUBCELLULAR LOCATION: Nucleus {ECO:0000250}. Note=Closely associated with pericentric heterochromatin. {ECO:0000250}.
N : D377Y	Q9NSI2	Q9NSI2	12|14|10|16	52	13	4	5|3|3|6|7|5|6|4|5|4|3|1|0|0|0|0	0.85	0.99	0.85	0.99	0.85	0.27	4	0.02		TRUE	Q9NSI2	SLX9	6	2.63158	19	68	27.9412	TRUE	Q9NSI2	SLX9_HUMAN	Ribosome biogenesis protein SLX9 homolog	maturation of SSU-rRNA from tricistronic rRNA transcript (SSU-rRNA, 5.8S rRNA, LSU-rRNA) [GO:0000462]	90S preribosome [GO:0030686]; nucleolus [GO:0005730]; preribosome, small subunit precursor [GO:0030688]		SLX9	Homo sapiens (Human)	230	25456	SUBCELLULAR LOCATION: Nucleus, nucleolus {ECO:0000250|UniProtKB:P53251}.
N : D377Y	Q9NV31	Q9NV31	3|4|3|4	14	3.5	4	0|0|0|2|3|1|0|0|0|0|0|0|0|0|0|0	0.87	0.91	0.87	0.91	0.87	1.53	9.33	0.02		TRUE	Q9NV31	IMP3	2	1.16667	6	68	8.82353	TRUE	Q9NV31	IMP3_HUMAN	U3 small nucleolar ribonucleoprotein protein IMP3 (U3 snoRNP protein IMP3) (BRMS2)	maturation of SSU-rRNA [GO:0030490]; rRNA processing [GO:0006364]	Mpp10 complex [GO:0034457]; nucleolus [GO:0005730]; nucleoplasm [GO:0005654]; nucleus [GO:0005634]; preribosome [GO:0030684]; small-subunit processome [GO:0032040]	RNA binding [GO:0003723]; rRNA binding [GO:0019843]; snoRNA binding [GO:0030515]	IMP3	Homo sapiens (Human)	184	21850	SUBCELLULAR LOCATION: Nucleus, nucleolus {ECO:0000269|PubMed:12655004}.
N : D377Y	Q9NVN8	Q9NVN8	16|20|14|12	62	15.5	4	0|1|1|1|2|3|2|1|1|0|1|0|0|0|0|0	1	1	1	1	1	19.05	19.08	0		TRUE	Q9NVN8	GNL3L	14	4.52941	17	68	25	TRUE	Q9NVN8	GNL3L_HUMAN	Guanine nucleotide-binding protein-like 3-like protein	negative regulation of protein binding [GO:0032091]; negative regulation of protein sumoylation [GO:0033234]; negative regulation of protein ubiquitination [GO:0031397]; negative regulation of telomere maintenance via telomerase [GO:0032211]; positive regulation of protein localization to chromosome, telomeric region [GO:1904816]; positive regulation of protein-containing complex assembly [GO:003…	cytosol [GO:0005829]; membrane [GO:0016020]; nucleolus [GO:0005730]; nucleoplasm [GO:0005654]; telomerase holoenzyme complex [GO:0005697]	GTP binding [GO:0005525]; RNA binding [GO:0003723]	GNL3L	Homo sapiens (Human)	582	65573	SUBCELLULAR LOCATION: Nucleus, nucleolus {ECO:0000269|PubMed:17034816}.
N : D377Y	Q9NVU7	Q9NVU7	9|7|7|9	32	8	4	0|0|0|0|2|0|1|1|0|0|0|0|0|0|0|0	1	1	1	1	1	8.04	32	0		TRUE	Q9NVU7	SDAD1	4	1.23077	13	68	19.1176	TRUE	Q9NVU7	SDA1_HUMAN	Protein SDA1 homolog (Nucleolar protein 130) (SDA1 domain-containing protein 1) (hSDA)	protein transport [GO:0015031]; ribosomal large subunit biogenesis [GO:0042273]; ribosomal large subunit export from nucleus [GO:0000055]	nucleolus [GO:0005730]; nucleoplasm [GO:0005654]		SDAD1	Homo sapiens (Human)	687	79871	SUBCELLULAR LOCATION: Nucleus, nucleolus {ECO:0000269|PubMed:11790298, ECO:0000269|PubMed:14976432}.
N : D377Y	Q9NVV4	Q9NVV4	3|3|2|2	10	2.5	4	1|0|0|0|0|0|0|0|0|0|0|0|0|0|0|0	0.97	0.99	0.97	0.99	0.97	2.98	25	0.01		TRUE	Q9NVV4	MTPAP	3	1.45455	11	68	16.1765	TRUE	Q9NVV4	PAPD1_HUMAN	Poly(A) RNA polymerase, mitochondrial (PAP) (EC 2.7.7.19) (PAP-associated domain-containing protein 1) (Polynucleotide adenylyltransferase) (Terminal uridylyltransferase 1) (TUTase 1) (mtPAP)	histone mRNA catabolic process [GO:0071044]; mRNA polyadenylation [GO:0006378]; RNA 3'-end processing [GO:0031123]	intracellular membrane-bounded organelle [GO:0043231]; mitochondrion [GO:0005739]; nucleoplasm [GO:0005654]	ATP binding [GO:0005524]; identical protein binding [GO:0042802]; magnesium ion binding [GO:0000287]; manganese ion binding [GO:0030145]; nucleotidyltransferase activity [GO:0016779]; polynucleotide adenylyltransferase activity [GO:0004652]; protein homodimerization activity [GO:0042803]; RNA adenylyltransferase activity [GO:1990817]; RNA binding [GO:0003723]; UTP binding [GO:0002134]	MTPAP	Homo sapiens (Human)	582	66172	SUBCELLULAR LOCATION: Cytoplasm {ECO:0000269|PubMed:18172165}. Mitochondrion {ECO:0000269|PubMed:15547249, ECO:0000269|PubMed:15769737}.
N : D377Y	Q9P2K5	Q9P2K5	10|13|9|6	38	9.5	4	0|1|0|0|1|0|0|0|1|0|0|0|0|0|0|0	1	1	1	1	1	8.4	50.67	0		TRUE	Q9P2K5	MYEF2	6	2.75	20	68	29.4118	TRUE	Q9P2K5	MYEF2_HUMAN	Myelin expression factor 2 (MEF-2) (MyEF-2) (MST156)	myotube differentiation [GO:0014902]; neuron differentiation [GO:0030182]; regulation of mRNA stability involved in response to oxidative stress [GO:2000815]; regulation of transcription by RNA polymerase II [GO:0006357]	cytoplasm [GO:0005737]; nucleus [GO:0005634]; post-mRNA release spliceosomal complex [GO:0071014]; ribonucleoprotein complex [GO:1990904]	mRNA binding [GO:0003729]; RNA binding [GO:0003723]; single-stranded DNA binding [GO:0003697]	MYEF2	Homo sapiens (Human)	600	64122	SUBCELLULAR LOCATION: Nucleus.
N : D377Y	Q9UI10	Q9UI10	6|6|4|7	23	5.75	4	0|1|1|0|0|0|0|0|0|2|0|0|0|1|0|0	1	1	1	1	1	4.28	18.4	0		TRUE	Q9UI10	EIF2B4	6	1.40909	22	68	32.3529	TRUE	Q9UI10	EI2BD_HUMAN	Translation initiation factor eIF-2B subunit delta (eIF-2B GDP-GTP exchange factor subunit delta)	myelination [GO:0042552]; oligodendrocyte development [GO:0014003]; ovarian follicle development [GO:0001541]; regulation of catalytic activity [GO:0050790]; regulation of translation [GO:0006417]; response to glucose [GO:0009749]; response to heat [GO:0009408]; response to peptide hormone [GO:0043434]; T cell receptor signaling pathway [GO:0050852]; translational initiation [GO:0006413]	cytoplasm [GO:0005737]; cytosol [GO:0005829]; eukaryotic translation initiation factor 2B complex [GO:0005851]	translation initiation factor activity [GO:0003743]; translation initiation factor binding [GO:0031369]	EIF2B4	Homo sapiens (Human)	523	57557
N : D377Y	Q9UNQ2	Q9UNQ2	13|12|13|12	50	12.5	4	0|0|0|1|1|1|0|0|0|0|0|0|0|1|0|0	1	1	1	1	1	16.7	50	0		TRUE	Q9UNQ2	DIMT1	14	3.83333	30	68	44.1176	TRUE	Q9UNQ2	DIM1_HUMAN	Probable dimethyladenosine transferase (EC 2.1.1.183) (DIM1 dimethyladenosine transferase 1 homolog) (DIM1 dimethyladenosine transferase 1-like) (Probable 18S rRNA (adenine(1779)-N(6)/adenine(1780)-N(6))-dimethyltransferase) (Probable 18S rRNA dimethylase) (Probable S-adenosylmethionine-6-N',N'-adenosyl(rRNA) dimethyltransferase)	positive regulation of rRNA processing [GO:2000234]; rRNA methylation [GO:0031167]	cytosol [GO:0005829]; nucleolus [GO:0005730]; nucleoplasm [GO:0005654]	18S rRNA (adenine(1779)-N(6)/adenine(1780)-N(6))-dimethyltransferase activity [GO:0052909]; RNA binding [GO:0003723]; rRNA (adenine-N6,N6-)-dimethyltransferase activity [GO:0000179]	DIMT1	Homo sapiens (Human)	313	35236	SUBCELLULAR LOCATION: Nucleus, nucleoplasm {ECO:0000269|PubMed:25851604}. Nucleus, nucleolus {ECO:0000269|PubMed:12429849, ECO:0000269|PubMed:25851604}.
N : D377Y	Q9Y2G7	Q9Y2G7	4|2|2|3	11	2.75	4	0|0|0|0|0|0|0|0|0|0|0|0|0|0|0|0	0.97	1	0.97	1	0.97	2.98	27.5	0		TRUE	Q9Y2G7	ZFP30	4	1.45455	11	68	16.1765	TRUE	Q9Y2G7	ZFP30_HUMAN	Zinc finger protein 30 homolog (Zfp-30) (Zinc finger protein 745)	regulation of transcription by RNA polymerase II [GO:0006357]	nucleus [GO:0005634]	DNA-binding transcription factor activity, RNA polymerase II-specific [GO:0000981]; metal ion binding [GO:0046872]; RNA polymerase II cis-regulatory region sequence-specific DNA binding [GO:0000978]	ZFP30	Homo sapiens (Human)	519	61558	SUBCELLULAR LOCATION: Nucleus {ECO:0000305}.
N : D3L	A0AV96	A0AV96	2|4|3|3	12	3	4	0|0|0|1|1|0|0|0|0|0|0|1|0|0|0|0	0.95	0.99	0.95	0.99	0.95	1.8	16	0.01		TRUE	A0AV96	RBM47	2	1.2	5	68	7.35294	TRUE	A0AV96	RBM47_HUMAN	RNA-binding protein 47 (RNA-binding motif protein 47)	cytidine to uridine editing [GO:0016554]; hematopoietic progenitor cell differentiation [GO:0002244]	nucleus [GO:0005634]	mRNA binding [GO:0003729]; RNA binding [GO:0003723]	RBM47	Homo sapiens (Human)	593	64099	SUBCELLULAR LOCATION: Nucleus {ECO:0000250}.
N : D3L	A6ND36	A6ND36	3|3|3|6	15	3.75	4	0|0|0|0|0|0|0|0|0|0|0|0|0|0|0|0	0.99	1	0.99	1	0.99	4.83	37.5	0		TRUE	A6ND36	FAM83G	3	1.22222	18	68	26.4706	TRUE	A6ND36	FA83G_HUMAN	Protein FAM83G (Protein associated with SMAD1)	BMP signaling pathway [GO:0030509]; signal transduction [GO:0007165]	cytosol [GO:0005829]; nucleus [GO:0005634]	protein kinase binding [GO:0019901]	FAM83G	Homo sapiens (Human)	823	90835	SUBCELLULAR LOCATION: Cytoplasm, cytosol {ECO:0000269|PubMed:24554596}. Nucleus {ECO:0000269|PubMed:24554596}. Note=Detected predominantly in cytosolic. Upon BMP stimulation, a small portion of PAWS1 is detected in the nucleus. {ECO:0000269|PubMed:24554596}.
N : D3L	O00442	O00442	14|7|4|6	31	7.75	4	0|0|0|0|0|0|0|0|0|0|0|0|0|0|0|0	1	1	1	1	1	6.57	77.5	0		TRUE	O00442	RTCA	2	1.16667	6	68	8.82353	TRUE	O00442	RTCA_HUMAN	RNA 3'-terminal phosphate cyclase (RNA cyclase) (RNA-3'-phosphate cyclase) (EC 6.5.1.4) (RNA terminal phosphate cyclase domain-containing protein 1) (RTC domain-containing protein 1)	RNA processing [GO:0006396]	nucleoplasm [GO:0005654]; nucleus [GO:0005634]	ATP binding [GO:0005524]; RNA binding [GO:0003723]; RNA-3'-phosphate cyclase activity [GO:0003963]	RTCA	Homo sapiens (Human)	366	39337	SUBCELLULAR LOCATION: Nucleus, nucleoplasm {ECO:0000269|PubMed:9184239}.
N : D3L	O00469	O00469	16|11|14|10	51	12.75	4	0|0|0|1|0|0|0|0|0|0|0|1|0|0|0|0	1	1	1	1	1	15.68	102	0		TRUE	O00469	PLOD2	4	1.4	10	68	14.7059	TRUE	O00469	PLOD2_HUMAN	Procollagen-lysine,2-oxoglutarate 5-dioxygenase 2 (EC 1.14.11.4) (Lysyl hydroxylase 2) (LH2)	hydroxylysine biosynthetic process [GO:0046947]; peptidyl-lysine hydroxylation [GO:0017185]; protein modification process [GO:0036211]; response to hypoxia [GO:0001666]	endoplasmic reticulum [GO:0005783]; endoplasmic reticulum membrane [GO:0005789]; extracellular exosome [GO:0070062]; rough endoplasmic reticulum membrane [GO:0030867]	iron ion binding [GO:0005506]; L-ascorbic acid binding [GO:0031418]; procollagen-lysine 5-dioxygenase activity [GO:0008475]	PLOD2	Homo sapiens (Human)	737	84686	SUBCELLULAR LOCATION: Rough endoplasmic reticulum membrane; Peripheral membrane protein; Lumenal side.
N : D3L	O60443	O60443	2|2|3|3	10	2.5	4	0|0|0|0|0|0|0|0|0|0|0|0|0|0|1|0	0.97	0.99	0.97	0.99	0.97	2.98	25	0.01		TRUE	O60443	GSDME	4	1.7	10	68	14.7059	TRUE	O60443	GSDME_HUMAN	Gasdermin-E (Inversely correlated with estrogen receptor expression 1) (ICERE-1) (Non-syndromic hearing impairment protein 5) [Cleaved into: Gasdermin-E, N-terminal (GSDME-NT); Gasdermin-E, C-terminal (GSDME-CT)]	cell death [GO:0008219]; cellular response to tumor necrosis factor [GO:0071356]; cellular response to virus [GO:0098586]; granzyme-mediated programmed cell death signaling pathway [GO:0140507]; inner ear auditory receptor cell differentiation [GO:0042491]; necrotic cell death [GO:0070265]; negative regulation of cell population proliferation [GO:0008285]; positive regulation of immune response t…	cytoplasm [GO:0005737]; cytosol [GO:0005829]; membrane [GO:0016020]; plasma membrane [GO:0005886]	cardiolipin binding [GO:1901612]; phosphatidylinositol-4,5-bisphosphate binding [GO:0005546]; wide pore channel activity [GO:0022829]	GSDME	Homo sapiens (Human)	496	54555	SUBCELLULAR LOCATION: [Gasdermin-E, N-terminal]: Cell membrane {ECO:0000269|PubMed:28045099, ECO:0000269|PubMed:28459430}; Multi-pass membrane protein {ECO:0000250|UniProtKB:Q5Y4Y6}.; SUBCELLULAR LOCATION: [Gasdermin-E]: Cytoplasm, cytosol {ECO:0000269|PubMed:28045099}.
N : D3L	O60547	O60547	4|5|4|3	16	4	4	0|0|0|0|0|0|0|0|1|0|1|0|0|0|0|0	1	1	1	1	1	4.4	32	0		TRUE	O60547	GMDS	3	1.33333	9	68	13.2353	TRUE	O60547	GMDS_HUMAN	GDP-mannose 4,6 dehydratase (EC 4.2.1.47) (GDP-D-mannose dehydratase) (GMD)	'de novo' GDP-L-fucose biosynthetic process [GO:0042351]; GDP-mannose metabolic process [GO:0019673]; Notch signaling pathway [GO:0007219]	cytoplasm [GO:0005737]; cytosol [GO:0005829]; extracellular exosome [GO:0070062]	GDP-mannose 4,6-dehydratase activity [GO:0008446]; identical protein binding [GO:0042802]; NADP+ binding [GO:0070401]	GMDS	Homo sapiens (Human)	372	41950
N : D3L	O60678	O60678	6|6|4|4	20	5	4	0|0|1|2|1|1|1|2|2|0|1|1|1|0|0|0	0.88	0.98	0.88	0.98	0.88	1.32	6.15	0.02		TRUE	O60678	PRMT3	3	1.28571	14	68	20.5882	TRUE	O60678	ANM3_HUMAN	Protein arginine N-methyltransferase 3 (EC 2.1.1.319) (Heterogeneous nuclear ribonucleoprotein methyltransferase-like protein 3)	dendritic spine morphogenesis [GO:0060997]; negative regulation of protein ubiquitination [GO:0031397]; negative regulation of retinoic acid biosynthetic process [GO:1900053]; peptidyl-arginine methylation, to asymmetrical-dimethyl arginine [GO:0019919]; protein methylation [GO:0006479]	cytoplasm [GO:0005737]; cytosol [GO:0005829]	metal ion binding [GO:0046872]; methyltransferase activity [GO:0008168]; modified amino acid binding [GO:0072341]; protein-arginine N-methyltransferase activity [GO:0016274]; protein-arginine omega-N asymmetric methyltransferase activity [GO:0035242]; protein-arginine omega-N monomethyltransferase activity [GO:0035241]; ribosome binding [GO:0043022]	PRMT3	Homo sapiens (Human)	531	59903	SUBCELLULAR LOCATION: Cytoplasm {ECO:0000269|PubMed:9642256}.
N : D3L	P00374	P00374	4|5|3|3	15	3.75	4	0|0|0|0|0|0|0|0|0|0|0|0|0|0|0|0	1	1	1	1	1	4.83	37.5	0		TRUE	P00374	DHFR	3	2	2	68	2.94118	TRUE	P00374	DYR_HUMAN	Dihydrofolate reductase (EC 1.5.1.3)	axon regeneration [GO:0031103]; dihydrofolate metabolic process [GO:0046452]; folic acid metabolic process [GO:0046655]; glycine biosynthetic process [GO:0006545]; negative regulation of translation [GO:0017148]; one-carbon metabolic process [GO:0006730]; positive regulation of nitric-oxide synthase activity [GO:0051000]; regulation of removal of superoxide radicals [GO:2000121]; response to meth…	cytosol [GO:0005829]; mitochondrion [GO:0005739]	dihydrofolate reductase activity [GO:0004146]; folic acid binding [GO:0005542]; mRNA binding [GO:0003729]; mRNA regulatory element binding translation repressor activity [GO:0000900]; NADP binding [GO:0050661]; NADPH binding [GO:0070402]; sequence-specific mRNA binding [GO:1990825]	DHFR	Homo sapiens (Human)	187	21453	SUBCELLULAR LOCATION: Mitochondrion {ECO:0000250|UniProtKB:P00375}. Cytoplasm {ECO:0000250|UniProtKB:P00375}.
N : D3L	P0DTC9	P0DTC9	304|339|327|323	1293	323.25	4	0|0|0|0|0|0|0|0|0|0|0|0|0|0|0|0	1	1	1	1	1	433.53	3232.5	0		TRUE								TRUE	P0DTC9	NCAP_SARS2	Nucleoprotein (N) (Nucleocapsid protein) (NC) (Protein N)	negative regulation of interferon-beta production [GO:0032688]; positive regulation of NLRP3 inflammasome complex assembly [GO:1900227]; response to host immune response [GO:0052572]; viral RNA genome packaging [GO:0019074]	host cell endoplasmic reticulum-Golgi intermediate compartment [GO:0044172]; host cell Golgi apparatus [GO:0044177]; host cell perinuclear region of cytoplasm [GO:0044220]; intracellular non-membrane-bounded organelle [GO:0043232]; MHC class I protein complex [GO:0042612]; ribonucleoprotein complex [GO:1990904]; viral capsid [GO:0019028]; viral nucleocapsid [GO:0019013]	identical protein binding [GO:0042802]; MHC class I protein binding [GO:0042288]; molecular condensate scaffold activity [GO:0140693]; protein homodimerization activity [GO:0042803]; RNA binding [GO:0003723]; RNA stem-loop binding [GO:0035613]	N	Severe acute respiratory syndrome coronavirus 2 (2019-nCoV) (SARS-CoV-2)	419	45626	SUBCELLULAR LOCATION: Virion {ECO:0000255|HAMAP-Rule:MF_04096}. Host cytoplasm {ECO:0000269|PubMed:33060197, ECO:0000269|PubMed:34341353}. Secreted {ECO:0000269|PubMed:35921414}. Host extracellular space {ECO:0000269|PubMed:35921414}. Note=Probably associates with ER-derived membranes where it participates in viral RNA synthesis and virus budding. When located inside the virion, complexed with th…
N : D3L	P13693	P13693	3|2|3|4	12	3	4	0|0|0|0|0|0|0|0|0|0|0|0|0|0|0|0	0.98	1	0.98	1	0.98	2.98	30	0		TRUE	P13693	TPT1	4	2	13	68	19.1176	TRUE	P13693	TCTP_HUMAN	Translationally-controlled tumor protein (TCTP) (Fortilin) (Histamine-releasing factor) (HRF) (p23)	calcium ion transport [GO:0006816]; cellular calcium ion homeostasis [GO:0006874]; negative regulation of apoptotic process [GO:0043066]; negative regulation of ectoderm development [GO:2000384]; negative regulation of intrinsic apoptotic signaling pathway in response to DNA damage [GO:1902230]; regulation of apoptotic process [GO:0042981]; response to virus [GO:0009615]; stem cell population mai…	cytoplasm [GO:0005737]; cytoplasmic microtubule [GO:0005881]; cytosol [GO:0005829]; extracellular exosome [GO:0070062]; extracellular space [GO:0005615]; multivesicular body [GO:0005771]; nucleoplasm [GO:0005654]; nucleus [GO:0005634]; spindle pole [GO:0000922]	calcium ion binding [GO:0005509]; DNA-binding transcription factor binding [GO:0140297]; RNA binding [GO:0003723]	TPT1	Homo sapiens (Human)	172	19595	SUBCELLULAR LOCATION: Cytoplasm {ECO:0000269|PubMed:9059837}.
N : D3L	P16885	P16885	7|4|2|2	15	3.75	4	0|0|0|0|0|0|0|0|0|0|0|0|0|0|0|0	0.98	1	0.98	1	0.98	2.98	37.5	0		TRUE	P16885	PLCG2	1	1	9	68	13.2353	TRUE	P16885	PLCG2_HUMAN	1-phosphatidylinositol 4,5-bisphosphate phosphodiesterase gamma-2 (EC 3.1.4.11) (Phosphoinositide phospholipase C-gamma-2) (Phospholipase C-IV) (PLC-IV) (Phospholipase C-gamma-2) (PLC-gamma-2)	activation of store-operated calcium channel activity [GO:0032237]; antifungal innate immune response [GO:0061760]; B cell differentiation [GO:0030183]; B cell receptor signaling pathway [GO:0050853]; calcium-mediated signaling [GO:0019722]; cell activation [GO:0001775]; cellular response to calcium ion [GO:0071277]; cellular response to lectin [GO:1990858]; cellular response to lipid [GO:0071396…	cytoplasm [GO:0005737]; cytosol [GO:0005829]; extracellular exosome [GO:0070062]; intracellular vesicle [GO:0097708]; perinuclear region of cytoplasm [GO:0048471]; plasma membrane [GO:0005886]; ruffle membrane [GO:0032587]	phosphatidylinositol phospholipase C activity [GO:0004435]; phospholipase C activity [GO:0004629]; phosphorylation-dependent protein binding [GO:0140031]; phosphotyrosine residue binding [GO:0001784]; protein kinase binding [GO:0019901]; protein tyrosine kinase binding [GO:1990782]; scaffold protein binding [GO:0097110]	PLCG2	Homo sapiens (Human)	1265	147870
N : D3L	P30084	P30084	4|4|4|4	16	4	4	0|0|0|1|0|0|0|0|0|0|0|0|0|0|0|0	1	1	1	1	1	6.57	40	0		TRUE	P30084	ECHS1	3	1.63636	11	68	16.1765	TRUE	P30084	ECHM_HUMAN	Enoyl-CoA hydratase, mitochondrial (mECH) (mECH1) (EC 4.2.1.17) (EC 5.3.3.8) (Enoyl-CoA hydratase 1) (ECHS1) (Short-chain enoyl-CoA hydratase) (SCEH)	branched-chain amino acid catabolic process [GO:0009083]; fatty acid beta-oxidation [GO:0006635]	mitochondrial matrix [GO:0005759]; mitochondrion [GO:0005739]	3-hydroxypropionyl-CoA dehydratase activity [GO:0043956]; crotonyl-CoA hydratase activity [GO:0120092]; delta(3)-delta(2)-enoyl-CoA isomerase activity [GO:0004165]; enoyl-CoA hydratase activity [GO:0004300]	ECHS1	Homo sapiens (Human)	290	31387	SUBCELLULAR LOCATION: Mitochondrion matrix.
N : D3L	P42765	P42765	3|9|5|2	19	4.75	4	0|0|0|0|0|0|0|0|0|0|0|0|0|0|0|0	0.99	1	0.99	1	0.99	2.98	47.5	0		TRUE	P42765	ACAA2	2	1.08333	12	68	17.6471	TRUE	P42765	THIM_HUMAN	3-ketoacyl-CoA thiolase, mitochondrial (EC 2.3.1.16) (Acetyl-CoA acetyltransferase) (EC 2.3.1.9) (Acetyl-CoA acyltransferase) (Acyl-CoA hydrolase, mitochondrial) (EC 3.1.2.-, EC 3.1.2.1, EC 3.1.2.2) (Beta-ketothiolase) (Mitochondrial 3-oxoacyl-CoA thiolase) (T1)	cellular response to hypoxia [GO:0071456]; cholesterol biosynthetic process [GO:0006695]; fatty acid beta-oxidation [GO:0006635]; negative regulation of mitochondrial membrane permeability involved in apoptotic process [GO:1902109]; negative regulation of mitochondrial outer membrane permeabilization involved in apoptotic signaling pathway [GO:1901029]	mitochondrial matrix [GO:0005759]; mitochondrion [GO:0005739]	acetyl-CoA C-acetyltransferase activity [GO:0003985]; acetyl-CoA C-acyltransferase activity [GO:0003988]; acetyl-CoA hydrolase activity [GO:0003986]; acyl-CoA hydrolase activity [GO:0047617]; myristoyl-CoA hydrolase activity [GO:0102991]; palmitoyl-CoA hydrolase activity [GO:0016290]; RNA binding [GO:0003723]	ACAA2	Homo sapiens (Human)	397	41924	SUBCELLULAR LOCATION: Mitochondrion {ECO:0000269|PubMed:18371312}.
N : D3L	P43897	P43897	5|3|2|2	12	3	4	0|0|0|1|2|1|0|1|0|0|0|0|0|0|0|0	0.83	1	0.83	1	0.83	0.84	9.6	0.03		TRUE	P43897	TSFM	3	1.5	12	68	17.6471	TRUE	P43897	EFTS_HUMAN	Elongation factor Ts, mitochondrial (EF-Ts) (EF-TsMt)	mitochondrial translational elongation [GO:0070125]; regulation of DNA-templated transcription elongation [GO:0032784]; regulation of mitochondrial translation [GO:0070129]; translational elongation [GO:0006414]	mitochondrial matrix [GO:0005759]; mitochondrion [GO:0005739]; nucleoplasm [GO:0005654]	RNA binding [GO:0003723]; translation elongation factor activity [GO:0003746]	TSFM	Homo sapiens (Human)	325	35391	SUBCELLULAR LOCATION: Mitochondrion.
N : D3L	P49840	P49840	16|18|12|12	58	14.5	4	1|1|0|2|3|1|1|0|0|1|1|0|0|0|1|1	1	1	1	1	1	12.06	17.85	0		TRUE	P49840	GSK3A	5	1.55556	27	68	39.7059	TRUE	P49840	GSK3A_HUMAN	Glycogen synthase kinase-3 alpha (GSK-3 alpha) (EC 2.7.11.26) (Serine/threonine-protein kinase GSK3A) (EC 2.7.11.1)	aging [GO:0007568]; cardiac left ventricle morphogenesis [GO:0003214]; cell migration [GO:0016477]; cellular response to glucocorticoid stimulus [GO:0071385]; cellular response to insulin stimulus [GO:0032869]; cellular response to interleukin-3 [GO:0036016]; cellular response to lithium ion [GO:0071285]; dopamine receptor signaling pathway [GO:0007212]; excitatory postsynaptic potential [GO:0060…	apical dendrite [GO:0097440]; axon [GO:0030424]; beta-catenin destruction complex [GO:0030877]; cytoplasm [GO:0005737]; cytosol [GO:0005829]; microtubule [GO:0005874]; mitochondrion [GO:0005739]; neuronal cell body [GO:0043025]; nucleus [GO:0005634]; postsynapse [GO:0098794]; proximal dendrite [GO:1990635]	ATP binding [GO:0005524]; protein kinase A catalytic subunit binding [GO:0034236]; protein serine kinase activity [GO:0106310]; protein serine/threonine kinase activity [GO:0004674]; protein serine/threonine kinase binding [GO:0120283]; signaling receptor binding [GO:0005102]; tau protein binding [GO:0048156]; tau-protein kinase activity [GO:0050321]	GSK3A	Homo sapiens (Human)	483	50981
N : D3L	P55263	P55263	2|4|6|8	20	5	4	1|0|0|1|0|0|0|0|0|0|0|1|1|1|0|0	0.92	1	0.92	1	0.92	0.81	16	0.01		TRUE	P55263	ADK	1	1	3	68	4.41176	TRUE	P55263	ADK_HUMAN	Adenosine kinase (AK) (EC 2.7.1.20) (Adenosine 5'-phosphotransferase)	AMP salvage [GO:0044209]; dAMP salvage [GO:0106383]; dATP biosynthetic process [GO:0006175]; GMP salvage [GO:0032263]; phosphorylation [GO:0016310]; purine nucleobase metabolic process [GO:0006144]; purine ribonucleoside salvage [GO:0006166]; ribonucleoside monophosphate biosynthetic process [GO:0009156]	cytosol [GO:0005829]; nucleoplasm [GO:0005654]; nucleus [GO:0005634]; plasma membrane [GO:0005886]	adenosine kinase activity [GO:0004001]; ATP binding [GO:0005524]; deoxyadenosine kinase activity [GO:0004136]; metal ion binding [GO:0046872]; RNA binding [GO:0003723]	ADK	Homo sapiens (Human)	362	40545	SUBCELLULAR LOCATION: [Isoform 1]: Nucleus {ECO:0000269|PubMed:19635462}.; SUBCELLULAR LOCATION: [Isoform 2]: Cytoplasm {ECO:0000269|PubMed:19635462}.
N : D3L	P55786	P55786	13|11|9|11	44	11	4	1|0|0|1|0|3|0|0|3|0|0|1|0|0|0|2	1	1	1	1	1	5.57	16	0		TRUE	P55786	NPEPPS	6	1.92857	28	68	41.1765	TRUE	P55786	PSA_HUMAN	Puromycin-sensitive aminopeptidase (PSA) (EC 3.4.11.14) (Cytosol alanyl aminopeptidase) (AAP-S)	cellular response to hypoxia [GO:0071456]; peptide catabolic process [GO:0043171]; positive regulation of protein targeting to mitochondrion [GO:1903955]; protein polyubiquitination [GO:0000209]; proteolysis [GO:0006508]	cytoplasm [GO:0005737]; cytosol [GO:0005829]; extracellular exosome [GO:0070062]; nucleus [GO:0005634]	aminopeptidase activity [GO:0004177]; metalloaminopeptidase activity [GO:0070006]; peptide binding [GO:0042277]; zinc ion binding [GO:0008270]	NPEPPS	Homo sapiens (Human)	919	103276	SUBCELLULAR LOCATION: Cytoplasm, cytosol {ECO:0000269|PubMed:10978616}. Nucleus {ECO:0000305}.
N : D3L	P61970	P61970	2|2|4|6	14	3.5	4	0|0|0|0|0|0|0|0|0|0|0|0|0|0|0|0	0.98	1	0.98	1	0.98	2.98	35	0		TRUE	P61970	NUTF2	1	1	4	68	5.88235	TRUE	P61970	NTF2_HUMAN	Nuclear transport factor 2 (NTF-2) (Placental protein 15) (PP15)	mRNA transport [GO:0051028]; nucleocytoplasmic transport [GO:0006913]; protein export from nucleus [GO:0006611]; protein import into nucleus [GO:0006606]; protein localization to nuclear pore [GO:0090204]	cytosol [GO:0005829]; extracellular exosome [GO:0070062]; nuclear inner membrane [GO:0005637]; nuclear membrane [GO:0031965]; nuclear outer membrane [GO:0005640]; nuclear pore central transport channel [GO:0044613]; nucleoplasm [GO:0005654]	identical protein binding [GO:0042802]; small GTPase binding [GO:0031267]; structural constituent of nuclear pore [GO:0017056]	NUTF2	Homo sapiens (Human)	127	14478	SUBCELLULAR LOCATION: Cytoplasm, cytosol {ECO:0000269|PubMed:10679025, ECO:0000269|PubMed:7744965}. Nucleus outer membrane {ECO:0000250|UniProtKB:P61972}. Nucleus, nuclear pore complex {ECO:0000250|UniProtKB:P61972}. Nucleus inner membrane {ECO:0000250|UniProtKB:P61972}. Nucleus, nucleoplasm {ECO:0000269|PubMed:10679025}. Note=At steady state it is essentially nucleoplasmic, enriched in nucleopla…
N : D3L	P63027	P63027	2|6|2|4	14	3.5	4	0|0|0|0|0|0|0|0|0|0|0|0|0|0|0|0	0.98	1	0.98	1	0.98	2.98	35	0		TRUE	P63027	VAMP2	1	1	13	68	19.1176	TRUE	P63027	VAMP2_HUMAN	Vesicle-associated membrane protein 2 (VAMP-2) (Synaptobrevin-2)	calcium-ion regulated exocytosis [GO:0017156]; cellular response to insulin stimulus [GO:0032869]; eosinophil degranulation [GO:0043308]; exocytosis [GO:0006887]; Golgi to plasma membrane protein transport [GO:0043001]; long-term synaptic potentiation [GO:0060291]; membrane fusion [GO:0061025]; positive regulation of intracellular protein transport [GO:0090316]; protein transport [GO:0015031]; pr…	clathrin-coated endocytic vesicle membrane [GO:0030669]; clathrin-coated vesicle [GO:0030136]; clathrin-sculpted gamma-aminobutyric acid transport vesicle membrane [GO:0061202]; clathrin-sculpted glutamate transport vesicle membrane [GO:0060203]; clathrin-sculpted monoamine transport vesicle membrane [GO:0070083]; cytoplasmic vesicle [GO:0031410]; cytosol [GO:0005829]; intracellular membrane-boun…	calcium-dependent protein binding [GO:0048306]; calmodulin binding [GO:0005516]; phospholipid binding [GO:0005543]; protein self-association [GO:0043621]; SNAP receptor activity [GO:0005484]; SNARE binding [GO:0000149]; syntaxin binding [GO:0019905]; syntaxin-1 binding [GO:0017075]	VAMP2	Homo sapiens (Human)	116	12663	SUBCELLULAR LOCATION: Cytoplasmic vesicle, secretory vesicle, synaptic vesicle membrane {ECO:0000269|PubMed:17313651}; Single-pass type IV membrane protein {ECO:0000255}. Cell membrane {ECO:0000250|UniProtKB:P63045}. Note=Colocalizes with PRKCZ and WDFY2 in intracellular vesicles (PubMed:17313651). {ECO:0000269|PubMed:17313651}.
N : D3L	Q08257	Q08257	8|4|9|11	32	8	4	0|0|0|0|0|0|0|0|0|0|0|0|0|1|1|0	1	1	1	1	1	6.12	64	0		TRUE	Q08257	CRYZ	2	1.14286	7	68	10.2941	TRUE	Q08257	QOR_HUMAN	Quinone oxidoreductase (EC 1.6.5.5) (NADPH:quinone reductase) (Zeta-crystallin)	protein homotetramerization [GO:0051289]; visual perception [GO:0007601]; xenobiotic catabolic process [GO:0042178]	cytosol [GO:0005829]; extracellular exosome [GO:0070062]	identical protein binding [GO:0042802]; mRNA 3'-UTR binding [GO:0003730]; NADPH binding [GO:0070402]; NADPH:quinone reductase activity [GO:0003960]; zinc ion binding [GO:0008270]	CRYZ	Homo sapiens (Human)	329	35207	SUBCELLULAR LOCATION: Cytoplasm {ECO:0000269|PubMed:20103721}.
N : D3L	Q12849	Q12849	17|15|11|11	54	13.5	4	0|0|0|0|0|0|1|0|0|0|0|0|0|1|0|0	1	1	1	1	1	17.21	108	0		TRUE	Q12849	GRSF1	5	2	33	68	48.5294	TRUE	Q12849	GRSF1_HUMAN	G-rich sequence factor 1 (GRSF-1)	anterior/posterior pattern specification [GO:0009952]; morphogenesis of embryonic epithelium [GO:0016331]; mRNA polyadenylation [GO:0006378]; positive regulation of mitochondrial RNA catabolic process [GO:0000962]; regulation of RNA splicing [GO:0043484]; tRNA processing [GO:0008033]	cytoplasm [GO:0005737]; mitochondrial nucleoid [GO:0042645]; mitochondrion [GO:0005739]; nucleoplasm [GO:0005654]; ribonucleoprotein complex [GO:1990904]; ribonucleoprotein granule [GO:0035770]	mRNA binding [GO:0003729]; RNA binding [GO:0003723]	GRSF1	Homo sapiens (Human)	480	53126	SUBCELLULAR LOCATION: [Isoform 1]: Mitochondrion matrix {ECO:0000269|PubMed:23473033, ECO:0000269|PubMed:23473034, ECO:0000269|PubMed:25683715, ECO:0000269|PubMed:29967381}. Note=Localizes to mitochondrial RNA granules found in close proximity to the mitochondrial nucleoids. {ECO:0000269|PubMed:23473033, ECO:0000269|PubMed:23473034, ECO:0000269|PubMed:25683715}.; SUBCELLULAR LOCATION: [Isoform 2]…
N : D3L	Q14558	Q14558	4|4|4|4	16	4	4	0|0|0|1|0|0|0|0|0|0|0|0|0|0|0|0	1	1	1	1	1	6.57	40	0		TRUE	Q14558	PRPSAP1	5	4.33333	3	68	4.41176	TRUE	Q14558	KPRA_HUMAN	Phosphoribosyl pyrophosphate synthase-associated protein 1 (PRPP synthase-associated protein 1) (39 kDa phosphoribosypyrophosphate synthase-associated protein) (PAP39)	5-phosphoribose 1-diphosphate biosynthetic process [GO:0006015]; nucleobase-containing compound metabolic process [GO:0006139]; purine nucleotide biosynthetic process [GO:0006164]	cytoplasm [GO:0005737]; ribose phosphate diphosphokinase complex [GO:0002189]	enzyme inhibitor activity [GO:0004857]; identical protein binding [GO:0042802]; magnesium ion binding [GO:0000287]; ribose phosphate diphosphokinase activity [GO:0004749]	PRPSAP1	Homo sapiens (Human)	356	39394
N : D3L	Q15032	Q15032	8|9|5|7	29	7.25	4	0|2|0|0|0|0|0|0|0|2|1|3|0|0|0|0	0.98	1	0.98	1	0.98	2.73	14.5	0		TRUE	Q15032	R3HDM1	3	1.66667	15	68	22.0588	TRUE	Q15032	R3HD1_HUMAN	R3H domain-containing protein 1			RNA binding [GO:0003723]	R3HDM1	Homo sapiens (Human)	1099	120696
N : D3L	Q17RN3	Q17RN3	6|3|2|2	13	3.25	4	0|0|0|0|0|0|0|0|0|0|0|0|0|0|0|0	0.97	1	0.97	1	0.97	2.98	32.5	0		TRUE								TRUE	Q17RN3	FA98C_HUMAN	Protein FAM98C		tRNA-splicing ligase complex [GO:0072669]		FAM98C	Homo sapiens (Human)	349	37329
N : D3L	Q17RS7	Q17RS7	5|5|4|4	18	4.5	4	2|1|2|0|0|0|0|0|0|1|3|2|1|3|0|0	0.79	0.87	0.79	0.87	0.79	0.86	4.8	0.04		TRUE	Q17RS7	GEN1	3	1.47826	23	68	33.8235	TRUE	Q17RS7	GEN_HUMAN	Flap endonuclease GEN homolog 1 (EC 3.1.-.-)	double-strand break repair via homologous recombination [GO:0000724]; positive regulation of mitotic cell cycle spindle assembly checkpoint [GO:0090267]; regulation of centrosome duplication [GO:0010824]; replication fork processing [GO:0031297]; resolution of mitotic recombination intermediates [GO:0071140]; resolution of recombination intermediates [GO:0071139]	centrosome [GO:0005813]; nucleoplasm [GO:0005654]	5'-flap endonuclease activity [GO:0017108]; crossover junction endodeoxyribonuclease activity [GO:0008821]; four-way junction DNA binding [GO:0000400]; magnesium ion binding [GO:0000287]; protein homodimerization activity [GO:0042803]	GEN1	Homo sapiens (Human)	908	102884	SUBCELLULAR LOCATION: Nucleus {ECO:0000305|PubMed:26578604, ECO:0000305|PubMed:28049850}.
N : D3L	Q3BBV0	Q3BBV0	14|12|6|4	36	9	4	0|0|0|0|0|0|0|0|0|0|0|0|0|0|0|0	1	1	1	1	1	6.57	90	0		TRUE	Q3BBV0	NBPF1	1	1	1	68	1.47059	TRUE	Q3BBV0	NBPF1_HUMAN	Neuroblastoma breakpoint family member 1		cytoplasm [GO:0005737]		NBPF1	Homo sapiens (Human)	1214	139258	SUBCELLULAR LOCATION: Cytoplasm {ECO:0000269|PubMed:16079250}.
N : D3L	Q53GS7	Q53GS7	11|12|8|9	40	10	4	0|0|0|0|0|0|0|0|0|1|0|2|0|2|0|0	1	1	1	1	1	7.05	32	0		TRUE	Q53GS7	GLE1	2	1.54545	11	68	16.1765	TRUE	Q53GS7	GLE1_HUMAN	mRNA export factor GLE1 (hGLE1) (GLE1 RNA export mediator) (GLE1-like protein) (Nucleoporin GLE1)	mRNA export from nucleus [GO:0006406]; nucleocytoplasmic transport [GO:0006913]; poly(A)+ mRNA export from nucleus [GO:0016973]; protein transport [GO:0015031]; regulation of translational initiation [GO:0006446]; regulation of translational termination [GO:0006449]	centriole [GO:0005814]; centrosome [GO:0005813]; ciliary basal body [GO:0036064]; cytoplasm [GO:0005737]; cytosol [GO:0005829]; extracellular space [GO:0005615]; membrane [GO:0016020]; nuclear envelope [GO:0005635]; nuclear membrane [GO:0031965]; nuclear pore [GO:0005643]; nuclear pore cytoplasmic filaments [GO:0044614]; nucleolus [GO:0005730]	identical protein binding [GO:0042802]; inositol hexakisphosphate binding [GO:0000822]; phospholipid binding [GO:0005543]; translation initiation factor binding [GO:0031369]	GLE1	Homo sapiens (Human)	698	79836	SUBCELLULAR LOCATION: Nucleus {ECO:0000269|PubMed:12668658}. Cytoplasm {ECO:0000269|PubMed:12668658}. Note=Shuttles between the nucleus and the cytoplasm (PubMed:12668658). Shuttling is essential for its mRNA export function (PubMed:12668658). {ECO:0000269|PubMed:12668658}.; SUBCELLULAR LOCATION: [Isoform 1]: Cytoplasm {ECO:0000269|PubMed:12668658}. Nucleus, nuclear pore complex {ECO:0000269|PubM…
N : D3L	Q5TAX3	Q5TAX3	11|9|17|15	52	13	4	3|1|3|0|0|0|0|0|0|2|1|0|3|3|0|0	1	1	1	1	1	4.38	13	0		TRUE	Q5TAX3	TUT4	4	1.68	25	68	36.7647	TRUE	Q5TAX3	TUT4_HUMAN	Terminal uridylyltransferase 4 (TUTase 4) (EC 2.7.7.52) (Zinc finger CCHC domain-containing protein 11)	miRNA catabolic process [GO:0010587]; miRNA metabolic process [GO:0010586]; negative regulation of transposition, RNA-mediated [GO:0010526]; nuclear-transcribed mRNA poly(A) tail shortening [GO:0000289]; oocyte maturation [GO:0001556]; polyuridylation-dependent mRNA catabolic process [GO:1990074]; pre-miRNA processing [GO:0031054]; RNA 3' uridylation [GO:0071076]; RNA 3'-end processing [GO:003112…	cytoplasm [GO:0005737]; cytoplasmic ribonucleoprotein granule [GO:0036464]; cytosol [GO:0005829]; extracellular exosome [GO:0070062]; extracellular space [GO:0005615]; nucleolus [GO:0005730]	miRNA binding [GO:0035198]; nucleotidyltransferase activity [GO:0016779]; RNA binding [GO:0003723]; RNA uridylyltransferase activity [GO:0050265]; zinc ion binding [GO:0008270]	TUT4	Homo sapiens (Human)	1644	185166	SUBCELLULAR LOCATION: Nucleus {ECO:0000269|PubMed:16643855}. Cytoplasm {ECO:0000269|PubMed:16643855, ECO:0000269|PubMed:19703396, ECO:0000269|PubMed:25480299}. Cytoplasm, Cytoplasmic ribonucleoprotein granule {ECO:0000269|PubMed:30122351}. Note=Mainly cytoplasmic (PubMed:19703396, PubMed:25480299). Translocates into the cytoplasm following treatment of the cell with LPS (PubMed:16643855). Co-enri…
N : D3L	Q659C4	Q659C4	15|15|11|8	49	12.25	4	1|1|2|0|0|0|0|0|0|3|1|2|4|3|2|5	0.98	1	0.98	1	0.98	2.56	8.17	0		TRUE	Q659C4	LARP1B	7	2.57576	33	68	48.5294	TRUE	Q659C4	LAR1B_HUMAN	La-related protein 1B (La ribonucleoprotein domain family member 1B) (La ribonucleoprotein domain family member 2) (La-related protein 2)	positive regulation of translation [GO:0045727]	cytoplasmic stress granule [GO:0010494]; cytosol [GO:0005829]; nucleus [GO:0005634]	RNA binding [GO:0003723]	LARP1B	Homo sapiens (Human)	914	105322
N : D3L	Q6ZN17	Q6ZN17	13|8|10|11	42	10.5	4	0|0|0|0|0|0|3|1|0|0|0|0|0|0|1|0	1	1	1	1	1	5.7	33.6	0		TRUE	Q6ZN17	LIN28B	11	2.69231	26	68	38.2353	TRUE	Q6ZN17	LN28B_HUMAN	Protein lin-28 homolog B (Lin-28B)	miRNA catabolic process [GO:0010587]; negative regulation of pre-miRNA processing [GO:2000632]; negative regulation of primary miRNA processing [GO:2000635]; positive regulation of miRNA catabolic process [GO:2000627]; pre-miRNA processing [GO:0031054]; RNA 3'-end processing [GO:0031123]; RNA destabilization [GO:0050779]	cytoplasm [GO:0005737]; cytosol [GO:0005829]; nucleolus [GO:0005730]; nucleoplasm [GO:0005654]; nucleus [GO:0005634]	mRNA binding [GO:0003729]; RNA binding [GO:0003723]; sequence-specific double-stranded DNA binding [GO:1990837]; zinc ion binding [GO:0008270]	LIN28B	Homo sapiens (Human)	250	27084	SUBCELLULAR LOCATION: Nucleus. Nucleus, nucleolus {ECO:0000269|PubMed:22118463}. Cytoplasm {ECO:0000269|PubMed:16971064}. Note=Predominantly nucleolar (PubMed:22118463). In Huh7 cells, predominantly cytoplasmic, with only a subset of cells exhibiting strong nuclear staining; however, the specificity of the polyclonal antibody used in these experiments has not been not documented (PubMed:16971064)…
N : D3L	Q7Z591	Q7Z591	2|5|3|2	12	3	4	0|0|0|0|0|0|0|0|0|0|0|0|0|0|0|0	0.97	1	0.97	1	0.97	2.98	30	0		TRUE								TRUE	Q7Z591	AKNA_HUMAN	Microtubule organization protein AKNA (AT-hook-containing transcription factor)	delamination [GO:0060232]; epithelial to mesenchymal transition [GO:0001837]; neuroblast delamination [GO:0060234]; neuroblast division in subventricular zone [GO:0021849]; positive regulation of transcription by RNA polymerase II [GO:0045944]; regulation of inflammatory response [GO:0050727]	centriole [GO:0005814]; centrosome [GO:0005813]; cytosol [GO:0005829]; fibrillar center [GO:0001650]; intracellular membrane-bounded organelle [GO:0043231]; membrane [GO:0016020]; microtubule [GO:0005874]; nucleoplasm [GO:0005654]	DNA binding [GO:0003677]	AKNA	Homo sapiens (Human)	1439	155139	SUBCELLULAR LOCATION: Cytoplasm, cytoskeleton, microtubule organizing center, centrosome, centriole {ECO:0000250|UniProtKB:Q80VW7}. Nucleus {ECO:0000269|PubMed:11268217}. Note=Localizes to the distal part of the subdistal appendages of the mother centriole in interphase. Also found at the proximal ends of centrioles and along microtubules. The centrosomal localization is dependent on centrioles. …
N : D3L	Q86XP1	Q86XP1	10|14|17|15	56	14	4	4|2|3|0|0|0|0|0|0|3|5|3|6|5|3|3	0.97	1	0.97	1	0.97	2.19	6.05	0.01		TRUE	Q86XP1	DGKH	6	3.12121	33	68	48.5294	TRUE	Q86XP1	DGKH_HUMAN	Diacylglycerol kinase eta (DAG kinase eta) (EC 2.7.1.107) (Diglyceride kinase eta) (DGK-eta)	diacylglycerol metabolic process [GO:0046339]; intracellular signal transduction [GO:0035556]; lipid phosphorylation [GO:0046834]; negative regulation of catalytic activity [GO:0043086]; phosphatidic acid biosynthetic process [GO:0006654]; phosphatidic acid metabolic process [GO:0046473]; platelet activation [GO:0030168]; protein kinase C-activating G protein-coupled receptor signaling pathway [G…	actin cytoskeleton [GO:0015629]; cytoplasm [GO:0005737]; endosome [GO:0005768]; intracellular membrane-bounded organelle [GO:0043231]; plasma membrane [GO:0005886]; protein-containing complex [GO:0032991]	ATP binding [GO:0005524]; diacylglycerol kinase activity [GO:0004143]; identical protein binding [GO:0042802]; kinase binding [GO:0019900]; metal ion binding [GO:0046872]; SAM domain binding [GO:0032093]	DGKH	Homo sapiens (Human)	1220	134866	SUBCELLULAR LOCATION: Cytoplasm {ECO:0000269|PubMed:12810723, ECO:0000269|PubMed:19710016}. Cell membrane {ECO:0000269|PubMed:12810723, ECO:0000269|PubMed:19710016}. Note=Translocated from the cytoplasm to endosomes in response to stress stimuli (PubMed:12810723). Isoform 2 is rapidly relocated back to the cytoplasm upon removal of stress stimuli, whereas isoform 1 exhibits sustained endosomal as…
N : D3L	Q8N3J3	Q8N3J3	2|6|2|4	14	3.5	4	0|0|0|2|0|1|2|0|0|0|0|0|0|0|0|0	0.83	0.99	0.83	0.99	0.83	0.8	11.2	0.03		TRUE								TRUE	Q8N3J3	HROB_HUMAN	Homologous recombination OB-fold protein	cellular response to DNA damage stimulus [GO:0006974]; DNA synthesis involved in DNA repair [GO:0000731]; female gamete generation [GO:0007292]; interstrand cross-link repair [GO:0036297]; male gamete generation [GO:0048232]; recombinational repair [GO:0000725]	nucleus [GO:0005634]; site of DNA damage [GO:0090734]	single-stranded DNA binding [GO:0003697]	HROB	Homo sapiens (Human)	647	69771	SUBCELLULAR LOCATION: Nucleus {ECO:0000269|PubMed:31467087}. Chromosome {ECO:0000269|PubMed:31467087}. Note=Localized to the sites of DNA damage. {ECO:0000269|PubMed:31467087}.
N : D3L	Q8N6R0	Q8N6R0	8|14|7|7	36	9	4	1|0|1|1|2|1|1|2|2|2|2|1|1|1|0|0	0.99	1	0.99	1	0.99	3.94	8	0		TRUE	Q8N6R0	METTL13	8	1.95	20	68	29.4118	TRUE	Q8N6R0	EFNMT_HUMAN	eEF1A lysine and N-terminal methyltransferase (eEF1A-KNMT) (Methyltransferase-like protein 13) [Includes: eEF1A lysine methyltransferase (EC 2.1.1.-); eEF1A N-terminal methyltransferase (EC 2.1.1.-)]	methylation [GO:0032259]; negative regulation of cell cycle G1/S phase transition [GO:1902807]; negative regulation of transcription by RNA polymerase II [GO:0000122]	cytoplasm [GO:0005737]; mitochondrion [GO:0005739]; nucleus [GO:0005634]	methyltransferase activity [GO:0008168]	METTL13	Homo sapiens (Human)	699	78768	SUBCELLULAR LOCATION: Cytoplasm {ECO:0000269|PubMed:27659353}. Nucleus {ECO:0000269|PubMed:27659353}. Mitochondrion {ECO:0000269|PubMed:27659353}.
N : D3L	Q8NFF5	Q8NFF5	4|6|10|6	26	6.5	4	0|0|1|0|0|0|0|0|0|0|1|1|1|2|2|2	0.98	1	0.98	1	0.98	2.67	10.4	0		TRUE	Q8NFF5	FLAD1	6	1.83333	24	68	35.2941	TRUE	Q8NFF5	FAD1_HUMAN	FAD synthase (EC 2.7.7.2) (FAD pyrophosphorylase) (FMN adenylyltransferase) (Flavin adenine dinucleotide synthase) [Includes: Molybdenum cofactor biosynthesis protein-like region; FAD synthase region]	FAD biosynthetic process [GO:0006747]; riboflavin metabolic process [GO:0006771]	cytosol [GO:0005829]; mitochondrial matrix [GO:0005759]; plasma membrane [GO:0005886]	ATP binding [GO:0005524]; FMN adenylyltransferase activity [GO:0003919]; identical protein binding [GO:0042802]	FLAD1	Homo sapiens (Human)	587	65266	SUBCELLULAR LOCATION: [Isoform 1]: Mitochondrion matrix {ECO:0000269|PubMed:20060505}.; SUBCELLULAR LOCATION: [Isoform 2]: Cytoplasm.
N : D3L	Q8TBB5	Q8TBB5	10|8|6|5	29	7.25	4	2|2|2|1|1|2|1|1|0|2|3|2|1|1|4|2	0.8	1	0.8	1	0.8	-0.11	4.3	0.03		TRUE	Q8TBB5	KLHDC4	4	1.89655	29	68	42.6471	TRUE	Q8TBB5	KLDC4_HUMAN	Kelch domain-containing protein 4				KLHDC4	Homo sapiens (Human)	520	57892
N : D3L	Q8WU79	Q8WU79	14|16|8|5	43	10.75	4	0|2|0|0|0|0|0|0|0|0|0|0|1|1|1|0	1	1	1	1	1	6.05	34.4	0		TRUE	Q8WU79	SMAP2	5	1.66667	27	68	39.7059	TRUE	Q8WU79	SMAP2_HUMAN	Stromal membrane-associated protein 2 (Stromal membrane-associated protein 1-like)		cytosol [GO:0005829]; nucleoplasm [GO:0005654]	GTPase activator activity [GO:0005096]; metal ion binding [GO:0046872]	SMAP2	Homo sapiens (Human)	429	46786	SUBCELLULAR LOCATION: Cytoplasm. Note=Detected in multiple foci throughout the cytoplasm and in juxtanuclear structures. {ECO:0000250}.
N : D3L	Q93073	Q93073	6|4|2|2	14	3.5	4	0|0|0|0|0|0|0|0|0|0|0|0|0|0|0|0	0.98	1	0.98	1	0.98	2.98	35	0		TRUE								TRUE	Q93073	SBP2L_HUMAN	Selenocysteine insertion sequence-binding protein 2-like (SECIS-binding protein 2-like)	selenocysteine incorporation [GO:0001514]	ribonucleoprotein complex [GO:1990904]	mRNA 3'-UTR binding [GO:0003730]; ribonucleoprotein complex binding [GO:0043021]; RNA binding [GO:0003723]; selenocysteine insertion sequence binding [GO:0035368]	SECISBP2L	Homo sapiens (Human)	1101	121776
N : D3L	Q96FW1	Q96FW1	6|4|6|3	19	4.75	4	1|0|1|1|0|1|1|0|2|1|1|2|1|2|1|1	0.75	0.96	0.75	0.96	0.75	-0.42	4.75	0.04		TRUE	Q96FW1	OTUB1	3	1.33333	12	68	17.6471	TRUE	Q96FW1	OTUB1_HUMAN	Ubiquitin thioesterase OTUB1 (EC 3.4.19.12) (Deubiquitinating enzyme OTUB1) (OTU domain-containing ubiquitin aldehyde-binding protein 1) (Otubain-1) (hOTU1) (Ubiquitin-specific-processing protease OTUB1)	adaptive immune response [GO:0002250]; cellular response to DNA damage stimulus [GO:0006974]; DNA repair [GO:0006281]; negative regulation of double-strand break repair [GO:2000780]; negative regulation of histone H2A K63-linked ubiquitination [GO:1901315]; protein K48-linked deubiquitination [GO:0071108]	cytosol [GO:0005829]; extracellular exosome [GO:0070062]; nucleoplasm [GO:0005654]; nucleus [GO:0005634]	cysteine-type deubiquitinase activity [GO:0004843]; deNEDDylase activity [GO:0019784]; ubiquitin binding [GO:0043130]; ubiquitin protein ligase binding [GO:0031625]	OTUB1	Homo sapiens (Human)	271	31284	SUBCELLULAR LOCATION: Cytoplasm {ECO:0000250}.
N : D3L	Q96L92	Q96L92	2|4|2|6	14	3.5	4	1|0|1|0|0|0|0|0|0|1|0|0|0|0|0|0	0.93	1	0.93	1	0.93	1.8	18.67	0.01		TRUE	Q96L92	SNX27	2	1.15385	13	68	19.1176	TRUE	Q96L92	SNX27_HUMAN	Sorting nexin-27	endocytic recycling [GO:0032456]; endosomal transport [GO:0016197]; endosome to lysosome transport [GO:0008333]; establishment of natural killer cell polarity [GO:0001770]; intracellular protein transport [GO:0006886]; regulation of postsynaptic membrane neurotransmitter receptor levels [GO:0099072]; signal transduction [GO:0007165]	cytosol [GO:0005829]; early endosome [GO:0005769]; early endosome membrane [GO:0031901]; endosome [GO:0005768]; glutamatergic synapse [GO:0098978]; immunological synapse [GO:0001772]; Schaffer collateral - CA1 synapse [GO:0098685]	phosphatidylinositol binding [GO:0035091]; phosphatidylinositol-3-phosphate binding [GO:0032266]	SNX27	Homo sapiens (Human)	541	61265	SUBCELLULAR LOCATION: Early endosome membrane; Peripheral membrane protein. Cytoplasm, cytosol. Note=Localizes to immunological synapse in T-cells. In T-cells, recruited from the cytosol to sorting endosomes by phosphoinositide-3-kinase products.
N : D3L	Q96SI1	Q96SI1	4|3|3|4	14	3.5	4	0|0|0|1|2|0|1|1|0|0|0|0|0|0|1|0	0.96	0.99	0.96	0.99	0.96	2.54	9.33	0.01		TRUE	Q96SI1	KCTD15	8	2.41667	12	68	17.6471	TRUE	Q96SI1	KCD15_HUMAN	BTB/POZ domain-containing protein KCTD15 (Potassium channel tetramerization domain-containing protein 15)	protein homooligomerization [GO:0051260]	nucleus [GO:0005634]	identical protein binding [GO:0042802]	KCTD15	Homo sapiens (Human)	283	31942	SUBCELLULAR LOCATION: Nucleus {ECO:0000250|UniProtKB:Q8K0E1}. Note=In the brain, localizes to the arcuate hypothalamic nucleus, the ventromedial hypothalamic nucleus and the accumbens nucleus of the ventral striatum. {ECO:0000250|UniProtKB:Q8K0E1}.
N : D3L	Q96T21	Q96T21	10|6|8|7	31	7.75	4	1|1|2|0|0|1|0|0|0|4|2|3|2|2|3|2	0.96	1	0.96	1	0.96	2.18	5.39	0.01		TRUE	Q96T21	SECISBP2	3	1.62069	29	68	42.6471	TRUE	Q96T21	SEBP2_HUMAN	Selenocysteine insertion sequence-binding protein 2 (SECIS-binding protein 2)	forebrain neuron development [GO:0021884]; negative regulation of nuclear-transcribed mRNA catabolic process, nonsense-mediated decay [GO:2000623]; selenocysteine incorporation [GO:0001514]; striatum development [GO:0021756]	mitochondrion [GO:0005739]; nucleoplasm [GO:0005654]; ribonucleoprotein complex [GO:1990904]	DNA binding [GO:0003677]; mRNA 3'-UTR binding [GO:0003730]; ribonucleoprotein complex binding [GO:0043021]; RNA binding [GO:0003723]; selenocysteine insertion sequence binding [GO:0035368]	SECISBP2	Homo sapiens (Human)	854	95462	SUBCELLULAR LOCATION: [Isoform 1]: Nucleus {ECO:0000305}.; SUBCELLULAR LOCATION: [Isoform 2]: Mitochondrion {ECO:0000269|PubMed:19004874}.
N : D3L	Q9BTV5	Q9BTV5	8|9|12|8	37	9.25	4	0|0|0|1|3|1|1|0|0|0|0|0|3|1|0|0	1	1	1	1	1	4.99	14.8	0		TRUE	Q9BTV5	FSD1	5	2.29167	24	68	35.2941	TRUE	Q9BTV5	FSD1_HUMAN	Fibronectin type III and SPRY domain-containing protein 1 (MID1-related protein 1) (Microtubule-associated protein GLFND)	cell cycle [GO:0007049]; cell division [GO:0051301]; cytoplasmic microtubule organization [GO:0031122]; regulation of cell division [GO:0051302]; regulation of cytokinesis [GO:0032465]; regulation of mitotic spindle organization [GO:0060236]	centrosome [GO:0005813]; cleavage furrow [GO:0032154]; cytoplasm [GO:0005737]; microtubule [GO:0005874]; nucleus [GO:0005634]	identical protein binding [GO:0042802]; microtubule binding [GO:0008017]	FSD1	Homo sapiens (Human)	496	55820	SUBCELLULAR LOCATION: Cytoplasm, cytoskeleton, microtubule organizing center, centrosome. Nucleus. Cytoplasm. Cleavage furrow. Note=Cell-cycle-dependent association with the centrosome. Colocalizes with a subpopulation of microtubules. Does not associate with microtubules during mitosis but reassociates with microtubules during cytokinesis. Localizes to the central portions of a small subset of m…
N : D3L	Q9BV44	Q9BV44	9|8|7|9	33	8.25	4	4|2|1|0|1|0|3|1|0|3|7|3|1|1|3|0	0.84	0.9	0.84	0.9	0.84	0.91	4.4	0.03		TRUE	Q9BV44	THUMPD3	6	2.12121	33	68	48.5294	TRUE	Q9BV44	THUM3_HUMAN	tRNA (guanine(6)-N2)-methyltransferase THUMP3 (EC 2.1.1.256) (THUMP domain-containing protein 3)	tRNA methylation [GO:0030488]; tRNA N2-guanine methylation [GO:0002940]	cytoplasm [GO:0005737]; cytosol [GO:0005829]; nucleolus [GO:0005730]	tRNA (guanine) methyltransferase activity [GO:0016423]; tRNA (guanine-N2-)-methyltransferase activity [GO:0004809]; tRNA binding [GO:0000049]	THUMPD3	Homo sapiens (Human)	507	57003	SUBCELLULAR LOCATION: Cytoplasm {ECO:0000269|PubMed:34669960, ECO:0000269|PubMed:34948388}.
N : D3L	Q9C0B9	Q9C0B9	8|8|4|6	26	6.5	4	0|0|0|0|0|0|0|0|0|0|0|0|1|0|0|0	1	1	1	1	1	6.57	65	0		TRUE	Q9C0B9	ZCCHC2	2	1.09091	11	68	16.1765	TRUE	Q9C0B9	ZCHC2_HUMAN	Zinc finger CCHC domain-containing protein 2		cytoplasm [GO:0005737]	nucleic acid binding [GO:0003676]; phosphatidylinositol binding [GO:0035091]; zinc ion binding [GO:0008270]	ZCCHC2	Homo sapiens (Human)	1178	125936
N : D3L	Q9GZZ9	Q9GZZ9	3|7|4|4	18	4.5	4	0|0|0|0|0|0|0|0|0|1|1|1|1|0|1|0	0.97	1	0.97	1	0.97	2.36	14.4	0.01		TRUE	Q9GZZ9	UBA5	4	1.625	8	68	11.7647	TRUE	Q9GZZ9	UBA5_HUMAN	Ubiquitin-like modifier-activating enzyme 5 (Ubiquitin-activating enzyme 5) (ThiFP1) (UFM1-activating enzyme) (Ubiquitin-activating enzyme E1 domain-containing protein 1)	erythrocyte differentiation [GO:0030218]; localization [GO:0051179]; megakaryocyte differentiation [GO:0030219]; neuromuscular process [GO:0050905]; protein K69-linked ufmylation [GO:1990592]; protein modification by small protein conjugation [GO:0032446]; protein ufmylation [GO:0071569]; regulation of intracellular estrogen receptor signaling pathway [GO:0033146]; response to endoplasmic reticul…	cytoplasm [GO:0005737]; cytosol [GO:0005829]; endoplasmic reticulum membrane [GO:0005789]; Golgi apparatus [GO:0005794]; intracellular membrane-bounded organelle [GO:0043231]; nucleus [GO:0005634]	ATP binding [GO:0005524]; protein homodimerization activity [GO:0042803]; UFM1 activating enzyme activity [GO:0071566]; zinc ion binding [GO:0008270]	UBA5	Homo sapiens (Human)	404	44863	SUBCELLULAR LOCATION: Cytoplasm {ECO:0000269|PubMed:18442052, ECO:0000269|PubMed:26872069}. Nucleus {ECO:0000269|PubMed:18442052}. Endoplasmic reticulum membrane {ECO:0000269|PubMed:30990354}. Golgi apparatus {ECO:0000269|PubMed:26872069}. Note=Localizes mainly in the cytoplasm, while it localizes to the nucleus in presence of SUMO2 (PubMed:18442052). Interaction with GABARAPL2 promotes localizat…
N : D3L	Q9H0J9	Q9H0J9	3|3|3|2	11	2.75	4	0|0|0|0|0|0|0|0|0|0|0|0|0|0|0|0	0.98	0.99	0.98	0.99	0.98	2.98	27.5	0		TRUE	Q9H0J9	PARP12	2	1.33333	3	68	4.41176	TRUE	Q9H0J9	PAR12_HUMAN	Protein mono-ADP-ribosyltransferase PARP12 (EC 2.4.2.-) (ADP-ribosyltransferase diphtheria toxin-like 12) (ARTD12) (Poly [ADP-ribose] polymerase 12) (PARP-12) (Zinc finger CCCH domain-containing protein 1)	protein auto-ADP-ribosylation [GO:0070213]	nucleus [GO:0005634]	metal ion binding [GO:0046872]; NAD+ ADP-ribosyltransferase activity [GO:0003950]; NAD+- protein-cysteine ADP-ribosyltransferase activity [GO:0140803]; NAD+-protein ADP-ribosyltransferase activity [GO:1990404]; nucleotidyltransferase activity [GO:0016779]; RNA binding [GO:0003723]	PARP12	Homo sapiens (Human)	701	79064	SUBCELLULAR LOCATION: Nucleus {ECO:0000305}.
N : D3L	Q9H3H3	Q9H3H3	15|13|7|6	41	10.25	4	0|0|0|0|0|0|0|0|0|0|0|0|0|0|0|0	1	1	1	1	1	9.89	102.5	0		TRUE								TRUE	Q9H3H3	CK068_HUMAN	UPF0696 protein C11orf68 (Basophilic leukemia-expressed protein Bles03) (Protein p5326)			RNA binding [GO:0003723]	C11orf68	Homo sapiens (Human)	292	31430
N : D3L	Q9H7E2	Q9H7E2	6|6|6|5	23	5.75	4	1|2|1|0|0|0|0|0|0|3|2|3|1|2|0|0	0.93	0.95	0.93	0.95	0.93	1.92	6.13	0.01		TRUE	Q9H7E2	TDRD3	7	1.85185	27	68	39.7059	TRUE	Q9H7E2	TDRD3_HUMAN	Tudor domain-containing protein 3	chromatin organization [GO:0006325]; DNA topological change [GO:0006265]	cytosol [GO:0005829]; DNA topoisomerase III-beta-TDRD3 complex [GO:0140225]; Golgi apparatus [GO:0005794]; nucleoplasm [GO:0005654]; nucleus [GO:0005634]	chromatin binding [GO:0003682]; methylated histone binding [GO:0035064]; RNA binding [GO:0003723]; transcription coactivator activity [GO:0003713]	TDRD3	Homo sapiens (Human)	651	73185	SUBCELLULAR LOCATION: Cytoplasm {ECO:0000269|PubMed:18632687}. Nucleus {ECO:0000269|PubMed:21172665}. Note=Predominantly cytoplasmic. Associated with actively translating polyribosomes and with mRNA stress granules. {ECO:0000269|PubMed:18632687, ECO:0000269|PubMed:18664458}.
N : D3L	Q9NQ86	Q9NQ86	5|6|6|4	21	5.25	4	0|0|1|0|0|0|0|0|0|0|0|4|0|0|0|0	0.96	0.97	0.96	0.97	0.96	2.51	16.8	0.01		TRUE	Q9NQ86	TRIM36	2	1.2	10	68	14.7059	TRUE	Q9NQ86	TRI36_HUMAN	E3 ubiquitin-protein ligase TRIM36 (EC 2.3.2.27) (RING finger protein 98) (RING-type E3 ubiquitin transferase TRIM36) (Tripartite motif-containing protein 36) (Zinc-binding protein Rbcc728)	acrosome reaction [GO:0007340]; mitotic cytokinesis [GO:0000281]; regulation of cell cycle [GO:0051726]; regulation of microtubule cytoskeleton organization [GO:0070507]; spindle organization [GO:0007051]	acrosomal vesicle [GO:0001669]; cytoplasm [GO:0005737]; cytoskeleton [GO:0005856]; cytosol [GO:0005829]	alpha-tubulin binding [GO:0043014]; ubiquitin-protein transferase activity [GO:0004842]; zinc ion binding [GO:0008270]	TRIM36	Homo sapiens (Human)	728	83013	SUBCELLULAR LOCATION: Cytoplasm {ECO:0000269|PubMed:28087737}. Cytoplasmic vesicle, secretory vesicle, acrosome {ECO:0000250|UniProtKB:Q80WG7}. Cytoplasm, cytoskeleton {ECO:0000250|UniProtKB:Q80WG7}. Note=Found in the acrosomal region of elongated spermatids and mature sperm. {ECO:0000250|UniProtKB:Q80WG7}.
N : D3L	Q9NQR4	Q9NQR4	7|5|4|4	20	5	4	2|1|1|0|0|0|0|0|0|1|1|1|5|2|1|0	0.77	0.95	0.77	0.95	0.77	0.67	5.33	0.04		TRUE	Q9NQR4	NIT2	5	1.57143	21	68	30.8824	TRUE	Q9NQR4	NIT2_HUMAN	Omega-amidase NIT2 (EC 3.5.1.3) (Nitrilase homolog 2)	asparagine metabolic process [GO:0006528]; glutamine metabolic process [GO:0006541]; oxaloacetate metabolic process [GO:0006107]	centrosome [GO:0005813]; cytosol [GO:0005829]; extracellular exosome [GO:0070062]; extracellular region [GO:0005576]; specific granule lumen [GO:0035580]; tertiary granule lumen [GO:1904724]	2-oxoglutaramate amidase activity [GO:0106008]; omega-amidase activity [GO:0050152]	NIT2	Homo sapiens (Human)	276	30608	SUBCELLULAR LOCATION: Cytoplasm {ECO:0000269|PubMed:17488281}.
N : D3L	Q9NSE4	Q9NSE4	14|9|14|10	47	11.75	4	4|3|4|0|0|0|1|0|2|5|4|2|1|2|1|3	0.98	1	0.98	1	0.98	2.99	5.88	0		TRUE	Q9NSE4	IARS2	5	2.25	32	68	47.0588	TRUE	Q9NSE4	SYIM_HUMAN	Isoleucine--tRNA ligase, mitochondrial (EC 6.1.1.5) (Isoleucyl-tRNA synthetase) (IleRS)	isoleucyl-tRNA aminoacylation [GO:0006428]; mitochondrial translation [GO:0032543]; tRNA aminoacylation for protein translation [GO:0006418]	mitochondrial matrix [GO:0005759]; mitochondrion [GO:0005739]	aminoacyl-tRNA editing activity [GO:0002161]; ATP binding [GO:0005524]; isoleucine-tRNA ligase activity [GO:0004822]; tRNA binding [GO:0000049]	IARS2	Homo sapiens (Human)	1012	113792	SUBCELLULAR LOCATION: Mitochondrion matrix {ECO:0000250}.
N : D3L	Q9NSV4	Q9NSV4	5|7|6|8	26	6.5	4	1|2|1|0|0|0|0|0|0|1|0|0|1|2|1|1	0.99	1	0.99	1	0.99	3.39	10.4	0		TRUE	Q9NSV4	DIAPH3	4	1.72222	18	68	26.4706	TRUE	Q9NSV4	DIAP3_HUMAN	Protein diaphanous homolog 3 (Diaphanous-related formin-3) (DRF3) (MDia2)	actin cytoskeleton organization [GO:0030036]; actin filament polymerization [GO:0030041]; cytoskeleton organization [GO:0007010]	actin filament [GO:0005884]; cytoplasm [GO:0005737]; cytosol [GO:0005829]; nucleus [GO:0005634]	actin binding [GO:0003779]; cadherin binding [GO:0045296]; small GTPase binding [GO:0031267]	DIAPH3	Homo sapiens (Human)	1193	136926	SUBCELLULAR LOCATION: Cytoplasm {ECO:0000269|PubMed:18755006, ECO:0000269|PubMed:19457867}. Nucleus {ECO:0000250|UniProtKB:Q9Z207}. Note=During mitosis, co-localizes with the actin-rich cleavage furrow and with the microtubule-rich central spindle during cytokinesis (PubMed:18755006, PubMed:19457867). Shuttles between the cytoplasm and the nucleus (By similarity). {ECO:0000250|UniProtKB:Q9Z207, E…
N : D3L	Q9NX05	Q9NX05	4|3|4|3	14	3.5	4	0|0|0|1|0|0|0|0|0|0|0|0|0|0|0|0	1	1	1	1	1	4.83	35	0		TRUE	Q9NX05	FAM120C	2	1.11111	9	68	13.2353	TRUE	Q9NX05	F120C_HUMAN	Constitutive coactivator of PPAR-gamma-like protein 2 (Protein FAM120C) (Tumor antigen BJ-HCC-21)		nucleus [GO:0005634]	RNA binding [GO:0003723]	FAM120C	Homo sapiens (Human)	1096	120588
N : D3L	Q9NYU2	Q9NYU2	11|18|12|13	54	13.5	4	3|3|3|5|1|4|3|1|3|5|4|6|5|2|2|3	0.96	1	0.96	1	0.96	2.15	4.08	0.01		TRUE	Q9NYU2	UGGT1	6	2.36667	30	68	44.1176	TRUE	Q9NYU2	UGGG1_HUMAN	UDP-glucose:glycoprotein glucosyltransferase 1 (UGT1) (hUGT1) (EC 2.4.1.-) (UDP--Glc:glycoprotein glucosyltransferase) (UDP-glucose ceramide glucosyltransferase-like 1)	'de novo' post-translational protein folding [GO:0051084]; endoplasmic reticulum mannose trimming [GO:1904380]; ER-associated misfolded protein catabolic process [GO:0071712]; protein N-linked glycosylation via asparagine [GO:0018279]	endoplasmic reticulum [GO:0005783]; endoplasmic reticulum lumen [GO:0005788]; endoplasmic reticulum quality control compartment [GO:0044322]; endoplasmic reticulum-Golgi intermediate compartment [GO:0005793]; extracellular exosome [GO:0070062]; protein-containing complex [GO:0032991]	UDP-glucose:glycoprotein glucosyltransferase activity [GO:0003980]; unfolded protein binding [GO:0051082]	UGGT1	Homo sapiens (Human)	1555	177190	SUBCELLULAR LOCATION: Endoplasmic reticulum lumen {ECO:0000255|PROSITE-ProRule:PRU10138, ECO:0000269|PubMed:10694380}. Endoplasmic reticulum-Golgi intermediate compartment {ECO:0000255|PROSITE-ProRule:PRU10138, ECO:0000269|PubMed:10694380}.
N : D3L	Q9UBQ7	Q9UBQ7	5|4|4|3	16	4	4	0|1|0|0|0|0|0|0|0|0|0|0|0|0|0|0	1	1	1	1	1	4.83	40	0		TRUE	Q9UBQ7	GRHPR	1	1	4	68	5.88235	TRUE	Q9UBQ7	GRHPR_HUMAN	Glyoxylate reductase/hydroxypyruvate reductase (EC 1.1.1.79) (EC 1.1.1.81)	carboxylic acid metabolic process [GO:0019752]; dicarboxylic acid metabolic process [GO:0043648]; glyoxylate metabolic process [GO:0046487]	catalytic complex [GO:1902494]; cytoplasm [GO:0005737]; cytosol [GO:0005829]; extracellular exosome [GO:0070062]; peroxisomal matrix [GO:0005782]	carboxylic acid binding [GO:0031406]; glycerate dehydrogenase activity [GO:0008465]; glyoxylate reductase (NADP+) activity [GO:0030267]; hydroxypyruvate reductase activity [GO:0016618]; NAD binding [GO:0051287]; NADPH binding [GO:0070402]; protein homodimerization activity [GO:0042803]	GRHPR	Homo sapiens (Human)	328	35668
N : D3L	Q9Y2K5	Q9Y2K5	13|7|19|12	51	12.75	4	1|3|1|1|0|1|1|1|1|3|2|2|1|1|1|0	0.99	1	0.99	1	0.99	3.49	10.2	0		TRUE	Q9Y2K5	R3HDM2	3	1.23333	30	68	44.1176	TRUE	Q9Y2K5	R3HD2_HUMAN	R3H domain-containing protein 2		nucleus [GO:0005634]	RNA binding [GO:0003723]	R3HDM2	Homo sapiens (Human)	976	106999	SUBCELLULAR LOCATION: Nucleus {ECO:0000305}.
N : D3L	Q9Y606	Q9Y606	13|18|13|12	56	14	4	0|0|0|1|2|1|2|1|0|1|2|0|0|0|0|0	1	1	1	1	1	20.37	22.4	0		TRUE	Q9Y606	PUS1	5	1.71429	21	68	30.8824	TRUE	Q9Y606	PUS1_HUMAN	Pseudouridylate synthase 1 homolog (EC 5.4.99.-) (tRNA pseudouridine synthase 1) (EC 5.4.99.12) (tRNA pseudouridine(38-40) synthase) (tRNA pseudouridylate synthase I) (tRNA-uridine isomerase I)	mitochondrial tRNA pseudouridine synthesis [GO:0070902]; mRNA processing [GO:0006397]; mRNA pseudouridine synthesis [GO:1990481]; RNA splicing [GO:0008380]; tRNA pseudouridine synthesis [GO:0031119]	cytoplasm [GO:0005737]; mitochondrial matrix [GO:0005759]; mitochondrion [GO:0005739]; nucleoplasm [GO:0005654]; nucleus [GO:0005634]	pseudouridine synthase activity [GO:0009982]; RNA binding [GO:0003723]; steroid receptor RNA activator RNA binding [GO:0002153]; tRNA binding [GO:0000049]; tRNA pseudouridine synthase activity [GO:0106029]	PUS1	Homo sapiens (Human)	427	47470	SUBCELLULAR LOCATION: [Isoform 1]: Mitochondrion {ECO:0000269|PubMed:17056637, ECO:0000305|PubMed:15772074}.; SUBCELLULAR LOCATION: [Isoform 2]: Nucleus {ECO:0000269|PubMed:17056637, ECO:0000305|PubMed:15772074}. Cytoplasm {ECO:0000305|PubMed:15772074}.
N : D3L	Q9Y6E0	Q9Y6E0	10|4|9|8	31	7.75	4	0|0|0|0|0|0|0|0|0|1|2|2|0|0|0|0	0.99	1	0.99	1	0.99	3.07	24.8	0		TRUE	Q9Y6E0	STK24	3	1.5	10	68	14.7059	TRUE	Q9Y6E0	STK24_HUMAN	Serine/threonine-protein kinase 24 (EC 2.7.11.1) (Mammalian STE20-like protein kinase 3) (MST-3) (STE20-like kinase MST3) [Cleaved into: Serine/threonine-protein kinase 24 36 kDa subunit (Mammalian STE20-like protein kinase 3 N-terminal) (MST3/N); Serine/threonine-protein kinase 24 12 kDa subunit (Mammalian STE20-like protein kinase 3 C-terminal) (MST3/C)]	cellular response to starvation [GO:0009267]; execution phase of apoptosis [GO:0097194]; intrinsic apoptotic signaling pathway in response to oxidative stress [GO:0008631]; negative regulation of cell migration [GO:0030336]; positive regulation of axon regeneration [GO:0048680]; protein autophosphorylation [GO:0046777]; protein phosphorylation [GO:0006468]; regulation of axon regeneration [GO:004…	cytoplasm [GO:0005737]; cytosol [GO:0005829]; extracellular exosome [GO:0070062]; Golgi apparatus [GO:0005794]; Golgi membrane [GO:0000139]; nucleolus [GO:0005730]; nucleoplasm [GO:0005654]; nucleus [GO:0005634]	ATP binding [GO:0005524]; cadherin binding [GO:0045296]; metal ion binding [GO:0046872]; protein kinase activity [GO:0004672]; protein serine kinase activity [GO:0106310]; protein serine/threonine kinase activity [GO:0004674]	STK24	Homo sapiens (Human)	443	49308	SUBCELLULAR LOCATION: Cytoplasm. Nucleus. Membrane. Note=The truncated form (MST3/N) translocates to the nucleus. Colocalizes with STK38L in the membrane.
N : D63G	A0AV96	A0AV96	2|2|2|6	12	3	4	0|0|0|1|1|0|0|0|0|0|0|1|0|0|0|0	0.89	1	0.89	1	0.89	1.8	16	0.02		TRUE	A0AV96	RBM47	2	1.2	5	68	7.35294	TRUE	A0AV96	RBM47_HUMAN	RNA-binding protein 47 (RNA-binding motif protein 47)	cytidine to uridine editing [GO:0016554]; hematopoietic progenitor cell differentiation [GO:0002244]	nucleus [GO:0005634]	mRNA binding [GO:0003729]; RNA binding [GO:0003723]	RBM47	Homo sapiens (Human)	593	64099	SUBCELLULAR LOCATION: Nucleus {ECO:0000250}.
N : D63G	A1L020	A1L020	15|10|8|6	39	9.75	4	0|0|0|0|0|0|0|0|0|0|0|0|0|0|0|0	1	1	1	1	1	9.89	97.5	0		TRUE								TRUE	A1L020	MEX3A_HUMAN	RNA-binding protein MEX3A (RING finger and KH domain-containing protein 4)		cytosol [GO:0005829]; nucleus [GO:0005634]; P-body [GO:0000932]	metal ion binding [GO:0046872]; RNA binding [GO:0003723]	MEX3A	Homo sapiens (Human)	520	54173	SUBCELLULAR LOCATION: Cytoplasm {ECO:0000269|PubMed:17267406}. Nucleus {ECO:0000269|PubMed:17267406}. Cytoplasm, P-body {ECO:0000269|PubMed:17267406}. Note=Predominantly expressed in the cytoplasm and shuttles between the cytoplasm and the nucleus through the CRM1 export pathway.
N : D63G	O00442	O00442	8|10|9|7	34	8.5	4	0|0|0|0|0|0|0|0|0|0|0|0|0|0|0|0	1	1	1	1	1	11.49	85	0		TRUE	O00442	RTCA	2	1.16667	6	68	8.82353	TRUE	O00442	RTCA_HUMAN	RNA 3'-terminal phosphate cyclase (RNA cyclase) (RNA-3'-phosphate cyclase) (EC 6.5.1.4) (RNA terminal phosphate cyclase domain-containing protein 1) (RTC domain-containing protein 1)	RNA processing [GO:0006396]	nucleoplasm [GO:0005654]; nucleus [GO:0005634]	ATP binding [GO:0005524]; RNA binding [GO:0003723]; RNA-3'-phosphate cyclase activity [GO:0003963]	RTCA	Homo sapiens (Human)	366	39337	SUBCELLULAR LOCATION: Nucleus, nucleoplasm {ECO:0000269|PubMed:9184239}.
N : D63G	O00469	O00469	11|9|5|5	30	7.5	4	0|0|0|1|0|0|0|0|0|0|0|1|0|0|0|0	1	1	1	1	1	7.79	60	0		TRUE	O00469	PLOD2	4	1.4	10	68	14.7059	TRUE	O00469	PLOD2_HUMAN	Procollagen-lysine,2-oxoglutarate 5-dioxygenase 2 (EC 1.14.11.4) (Lysyl hydroxylase 2) (LH2)	hydroxylysine biosynthetic process [GO:0046947]; peptidyl-lysine hydroxylation [GO:0017185]; protein modification process [GO:0036211]; response to hypoxia [GO:0001666]	endoplasmic reticulum [GO:0005783]; endoplasmic reticulum membrane [GO:0005789]; extracellular exosome [GO:0070062]; rough endoplasmic reticulum membrane [GO:0030867]	iron ion binding [GO:0005506]; L-ascorbic acid binding [GO:0031418]; procollagen-lysine 5-dioxygenase activity [GO:0008475]	PLOD2	Homo sapiens (Human)	737	84686	SUBCELLULAR LOCATION: Rough endoplasmic reticulum membrane; Peripheral membrane protein; Lumenal side.
N : D63G	O75223	O75223	3|4|2|2	11	2.75	4	0|2|0|1|0|1|0|1|0|0|0|0|0|0|0|0	0.83	0.99	0.83	0.99	0.83	0.84	8.8	0.03		TRUE	O75223	GGCT	2	1.11111	9	68	13.2353	TRUE	O75223	GGCT_HUMAN	Gamma-glutamylcyclotransferase (EC 4.3.2.9) (Cytochrome c-releasing factor 21)	release of cytochrome c from mitochondria [GO:0001836]	cytosol [GO:0005829]; extracellular exosome [GO:0070062]	gamma-glutamylcyclotransferase activity [GO:0003839]; protein homodimerization activity [GO:0042803]	GGCT	Homo sapiens (Human)	188	21008
N : D63G	P00374	P00374	3|5|3|2	13	3.25	4	0|0|0|0|0|0|0|0|0|0|0|0|0|0|0|0	0.98	1	0.98	1	0.98	2.98	32.5	0		TRUE	P00374	DHFR	3	2	2	68	2.94118	TRUE	P00374	DYR_HUMAN	Dihydrofolate reductase (EC 1.5.1.3)	axon regeneration [GO:0031103]; dihydrofolate metabolic process [GO:0046452]; folic acid metabolic process [GO:0046655]; glycine biosynthetic process [GO:0006545]; negative regulation of translation [GO:0017148]; one-carbon metabolic process [GO:0006730]; positive regulation of nitric-oxide synthase activity [GO:0051000]; regulation of removal of superoxide radicals [GO:2000121]; response to meth…	cytosol [GO:0005829]; mitochondrion [GO:0005739]	dihydrofolate reductase activity [GO:0004146]; folic acid binding [GO:0005542]; mRNA binding [GO:0003729]; mRNA regulatory element binding translation repressor activity [GO:0000900]; NADP binding [GO:0050661]; NADPH binding [GO:0070402]; sequence-specific mRNA binding [GO:1990825]	DHFR	Homo sapiens (Human)	187	21453	SUBCELLULAR LOCATION: Mitochondrion {ECO:0000250|UniProtKB:P00375}. Cytoplasm {ECO:0000250|UniProtKB:P00375}.
N : D63G	P06132	P06132	7|5|3|4	19	4.75	4	0|0|0|0|0|0|0|0|0|0|0|0|0|0|0|0	1	1	1	1	1	4.83	47.5	0		TRUE								TRUE	P06132	DCUP_HUMAN	Uroporphyrinogen decarboxylase (UPD) (URO-D) (EC 4.1.1.37)	heme biosynthetic process [GO:0006783]; porphyrin-containing compound catabolic process [GO:0006787]; porphyrin-containing compound metabolic process [GO:0006778]; protoporphyrinogen IX biosynthetic process [GO:0006782]	cytosol [GO:0005829]; nucleoplasm [GO:0005654]	uroporphyrinogen decarboxylase activity [GO:0004853]	UROD	Homo sapiens (Human)	367	40787	SUBCELLULAR LOCATION: Cytoplasm.
N : D63G	P0DTC9	P0DTC9	207|213|232|207	859	214.75	4	0|0|0|0|0|0|0|0|0|0|0|0|0|0|0|0	1	1	1	1	1	296.91	2147.5	0		TRUE								TRUE	P0DTC9	NCAP_SARS2	Nucleoprotein (N) (Nucleocapsid protein) (NC) (Protein N)	negative regulation of interferon-beta production [GO:0032688]; positive regulation of NLRP3 inflammasome complex assembly [GO:1900227]; response to host immune response [GO:0052572]; viral RNA genome packaging [GO:0019074]	host cell endoplasmic reticulum-Golgi intermediate compartment [GO:0044172]; host cell Golgi apparatus [GO:0044177]; host cell perinuclear region of cytoplasm [GO:0044220]; intracellular non-membrane-bounded organelle [GO:0043232]; MHC class I protein complex [GO:0042612]; ribonucleoprotein complex [GO:1990904]; viral capsid [GO:0019028]; viral nucleocapsid [GO:0019013]	identical protein binding [GO:0042802]; MHC class I protein binding [GO:0042288]; molecular condensate scaffold activity [GO:0140693]; protein homodimerization activity [GO:0042803]; RNA binding [GO:0003723]; RNA stem-loop binding [GO:0035613]	N	Severe acute respiratory syndrome coronavirus 2 (2019-nCoV) (SARS-CoV-2)	419	45626	SUBCELLULAR LOCATION: Virion {ECO:0000255|HAMAP-Rule:MF_04096}. Host cytoplasm {ECO:0000269|PubMed:33060197, ECO:0000269|PubMed:34341353}. Secreted {ECO:0000269|PubMed:35921414}. Host extracellular space {ECO:0000269|PubMed:35921414}. Note=Probably associates with ER-derived membranes where it participates in viral RNA synthesis and virus budding. When located inside the virion, complexed with th…
N : D63G	P15104	P15104	12|10|3|3	28	7	4	0|0|0|0|0|0|0|0|0|0|0|0|1|0|1|0	0.99	1	0.99	1	0.99	4.4	56	0		TRUE	P15104	GLUL	5	2.05263	19	68	27.9412	TRUE	P15104	GLNA_HUMAN	Glutamine synthetase (GS) (EC 6.3.1.2) (Glutamate--ammonia ligase) (Palmitoyltransferase GLUL) (EC 2.3.1.225)	ammonia assimilation cycle [GO:0019676]; angiogenesis [GO:0001525]; cell population proliferation [GO:0008283]; cellular response to starvation [GO:0009267]; glutamate catabolic process [GO:0006538]; glutamine biosynthetic process [GO:0006542]; positive regulation of epithelial cell proliferation [GO:0050679]; positive regulation of insulin secretion [GO:0032024]; positive regulation of synaptic …	axon terminus [GO:0043679]; cytoplasm [GO:0005737]; cytosol [GO:0005829]; extracellular exosome [GO:0070062]; glial cell projection [GO:0097386]; mitochondrion [GO:0005739]; myelin sheath [GO:0043209]; nucleus [GO:0005634]; perikaryon [GO:0043204]; plasma membrane [GO:0005886]; protein-containing complex [GO:0032991]; rough endoplasmic reticulum [GO:0005791]	ATP binding [GO:0005524]; dynein light chain binding [GO:0045503]; glutamate binding [GO:0016595]; glutamate-ammonia ligase activity [GO:0004356]; identical protein binding [GO:0042802]; magnesium ion binding [GO:0000287]; manganese ion binding [GO:0030145]; protein-cysteine S-palmitoyltransferase activity [GO:0019706]	GLUL	Homo sapiens (Human)	373	42064	SUBCELLULAR LOCATION: Cytoplasm, cytosol {ECO:0000269|PubMed:30158707}. Microsome {ECO:0000250|UniProtKB:P09606}. Mitochondrion {ECO:0000250|UniProtKB:P09606}. Cell membrane {ECO:0000269|PubMed:30158707}; Lipid-anchor {ECO:0000269|PubMed:30158707}. Note=Mainly localizes in the cytosol, with a fraction associated with the cell membrane. {ECO:0000269|PubMed:30158707}.
N : D63G	P24666	P24666	6|5|2|3	16	4	4	0|0|0|0|0|0|0|0|0|0|0|0|0|0|0|0	0.99	1	0.99	1	0.99	2.98	40	0		TRUE	P24666	ACP1	3	1.75	4	68	5.88235	TRUE	P24666	PPAC_HUMAN	Low molecular weight phosphotyrosine protein phosphatase (LMW-PTP) (LMW-PTPase) (EC 3.1.3.48) (Adipocyte acid phosphatase) (Low molecular weight cytosolic acid phosphatase) (EC 3.1.3.2) (Red cell acid phosphatase 1)	protein dephosphorylation [GO:0006470]	cytoplasm [GO:0005737]; cytoplasmic side of plasma membrane [GO:0009898]; cytosol [GO:0005829]; extracellular exosome [GO:0070062]; sarcolemma [GO:0042383]	acid phosphatase activity [GO:0003993]; non-membrane spanning protein tyrosine phosphatase activity [GO:0004726]; protein tyrosine phosphatase activity [GO:0004725]	ACP1	Homo sapiens (Human)	158	18042	SUBCELLULAR LOCATION: Cytoplasm.
N : D63G	P30084	P30084	6|6|7|6	25	6.25	4	0|0|0|1|0|0|0|0|0|0|0|0|0|0|0|0	1	1	1	1	1	9.89	62.5	0		TRUE	P30084	ECHS1	3	1.63636	11	68	16.1765	TRUE	P30084	ECHM_HUMAN	Enoyl-CoA hydratase, mitochondrial (mECH) (mECH1) (EC 4.2.1.17) (EC 5.3.3.8) (Enoyl-CoA hydratase 1) (ECHS1) (Short-chain enoyl-CoA hydratase) (SCEH)	branched-chain amino acid catabolic process [GO:0009083]; fatty acid beta-oxidation [GO:0006635]	mitochondrial matrix [GO:0005759]; mitochondrion [GO:0005739]	3-hydroxypropionyl-CoA dehydratase activity [GO:0043956]; crotonyl-CoA hydratase activity [GO:0120092]; delta(3)-delta(2)-enoyl-CoA isomerase activity [GO:0004165]; enoyl-CoA hydratase activity [GO:0004300]	ECHS1	Homo sapiens (Human)	290	31387	SUBCELLULAR LOCATION: Mitochondrion matrix.
N : D63G	P31151	P31151	7|6|4|3	20	5	4	0|0|0|0|0|0|0|0|0|0|0|0|0|0|0|0	1	1	1	1	1	4.83	50	0		TRUE	P31151	S100A7	1	1	2	68	2.94118	TRUE	P31151	S10A7_HUMAN	Protein S100-A7 (Psoriasin) (S100 calcium-binding protein A7)	angiogenesis [GO:0001525]; antimicrobial humoral immune response mediated by antimicrobial peptide [GO:0061844]; defense response to Gram-negative bacterium [GO:0050829]; epidermis development [GO:0008544]; innate immune response [GO:0045087]; keratinocyte differentiation [GO:0030216]; positive regulation of ERK1 and ERK2 cascade [GO:0070374]; positive regulation of granulocyte chemotaxis [GO:007…	azurophil granule lumen [GO:0035578]; collagen-containing extracellular matrix [GO:0062023]; cytoplasm [GO:0005737]; cytosol [GO:0005829]; endoplasmic reticulum [GO:0005783]; extracellular region [GO:0005576]; extracellular space [GO:0005615]; focal adhesion [GO:0005925]; nucleus [GO:0005634]	calcium ion binding [GO:0005509]; calcium-dependent protein binding [GO:0048306]; RAGE receptor binding [GO:0050786]; zinc ion binding [GO:0008270]	S100A7	Homo sapiens (Human)	101	11471	SUBCELLULAR LOCATION: Cytoplasm {ECO:0000269|PubMed:8618345}. Secreted {ECO:0000269|PubMed:8618345}. Note=Secreted by a non-classical secretory pathway.
N : D63G	P42765	P42765	7|11|7|8	33	8.25	4	0|0|0|0|0|0|0|0|0|0|0|0|0|0|0|0	1	1	1	1	1	11.49	82.5	0		TRUE	P42765	ACAA2	2	1.08333	12	68	17.6471	TRUE	P42765	THIM_HUMAN	3-ketoacyl-CoA thiolase, mitochondrial (EC 2.3.1.16) (Acetyl-CoA acetyltransferase) (EC 2.3.1.9) (Acetyl-CoA acyltransferase) (Acyl-CoA hydrolase, mitochondrial) (EC 3.1.2.-, EC 3.1.2.1, EC 3.1.2.2) (Beta-ketothiolase) (Mitochondrial 3-oxoacyl-CoA thiolase) (T1)	cellular response to hypoxia [GO:0071456]; cholesterol biosynthetic process [GO:0006695]; fatty acid beta-oxidation [GO:0006635]; negative regulation of mitochondrial membrane permeability involved in apoptotic process [GO:1902109]; negative regulation of mitochondrial outer membrane permeabilization involved in apoptotic signaling pathway [GO:1901029]	mitochondrial matrix [GO:0005759]; mitochondrion [GO:0005739]	acetyl-CoA C-acetyltransferase activity [GO:0003985]; acetyl-CoA C-acyltransferase activity [GO:0003988]; acetyl-CoA hydrolase activity [GO:0003986]; acyl-CoA hydrolase activity [GO:0047617]; myristoyl-CoA hydrolase activity [GO:0102991]; palmitoyl-CoA hydrolase activity [GO:0016290]; RNA binding [GO:0003723]	ACAA2	Homo sapiens (Human)	397	41924	SUBCELLULAR LOCATION: Mitochondrion {ECO:0000269|PubMed:18371312}.
N : D63G	P43897	P43897	2|2|3|4	11	2.75	4	0|0|0|1|2|1|0|1|0|0|0|0|0|0|0|0	0.83	0.99	0.83	0.99	0.83	0.84	8.8	0.03		TRUE	P43897	TSFM	3	1.5	12	68	17.6471	TRUE	P43897	EFTS_HUMAN	Elongation factor Ts, mitochondrial (EF-Ts) (EF-TsMt)	mitochondrial translational elongation [GO:0070125]; regulation of DNA-templated transcription elongation [GO:0032784]; regulation of mitochondrial translation [GO:0070129]; translational elongation [GO:0006414]	mitochondrial matrix [GO:0005759]; mitochondrion [GO:0005739]; nucleoplasm [GO:0005654]	RNA binding [GO:0003723]; translation elongation factor activity [GO:0003746]	TSFM	Homo sapiens (Human)	325	35391	SUBCELLULAR LOCATION: Mitochondrion.
N : D63G	P49840	P49840	15|17|13|12	57	14.25	4	1|1|0|2|3|1|1|0|0|1|1|0|0|0|1|1	1	1	1	1	1	12.06	17.54	0		TRUE	P49840	GSK3A	5	1.55556	27	68	39.7059	TRUE	P49840	GSK3A_HUMAN	Glycogen synthase kinase-3 alpha (GSK-3 alpha) (EC 2.7.11.26) (Serine/threonine-protein kinase GSK3A) (EC 2.7.11.1)	aging [GO:0007568]; cardiac left ventricle morphogenesis [GO:0003214]; cell migration [GO:0016477]; cellular response to glucocorticoid stimulus [GO:0071385]; cellular response to insulin stimulus [GO:0032869]; cellular response to interleukin-3 [GO:0036016]; cellular response to lithium ion [GO:0071285]; dopamine receptor signaling pathway [GO:0007212]; excitatory postsynaptic potential [GO:0060…	apical dendrite [GO:0097440]; axon [GO:0030424]; beta-catenin destruction complex [GO:0030877]; cytoplasm [GO:0005737]; cytosol [GO:0005829]; microtubule [GO:0005874]; mitochondrion [GO:0005739]; neuronal cell body [GO:0043025]; nucleus [GO:0005634]; postsynapse [GO:0098794]; proximal dendrite [GO:1990635]	ATP binding [GO:0005524]; protein kinase A catalytic subunit binding [GO:0034236]; protein serine kinase activity [GO:0106310]; protein serine/threonine kinase activity [GO:0004674]; protein serine/threonine kinase binding [GO:0120283]; signaling receptor binding [GO:0005102]; tau protein binding [GO:0048156]; tau-protein kinase activity [GO:0050321]	GSK3A	Homo sapiens (Human)	483	50981
N : D63G	P55263	P55263	4|2|3|3	12	3	4	1|0|0|1|0|0|0|0|0|0|0|1|1|1|0|0	0.88	0.98	0.88	0.98	0.88	0.81	9.6	0.02		TRUE	P55263	ADK	1	1	3	68	4.41176	TRUE	P55263	ADK_HUMAN	Adenosine kinase (AK) (EC 2.7.1.20) (Adenosine 5'-phosphotransferase)	AMP salvage [GO:0044209]; dAMP salvage [GO:0106383]; dATP biosynthetic process [GO:0006175]; GMP salvage [GO:0032263]; phosphorylation [GO:0016310]; purine nucleobase metabolic process [GO:0006144]; purine ribonucleoside salvage [GO:0006166]; ribonucleoside monophosphate biosynthetic process [GO:0009156]	cytosol [GO:0005829]; nucleoplasm [GO:0005654]; nucleus [GO:0005634]; plasma membrane [GO:0005886]	adenosine kinase activity [GO:0004001]; ATP binding [GO:0005524]; deoxyadenosine kinase activity [GO:0004136]; metal ion binding [GO:0046872]; RNA binding [GO:0003723]	ADK	Homo sapiens (Human)	362	40545	SUBCELLULAR LOCATION: [Isoform 1]: Nucleus {ECO:0000269|PubMed:19635462}.; SUBCELLULAR LOCATION: [Isoform 2]: Cytoplasm {ECO:0000269|PubMed:19635462}.
N : D63G	P55786	P55786	13|18|10|13	54	13.5	4	1|0|0|1|0|3|0|0|3|0|0|1|0|0|0|2	1	1	1	1	1	6.38	19.64	0		TRUE	P55786	NPEPPS	6	1.92857	28	68	41.1765	TRUE	P55786	PSA_HUMAN	Puromycin-sensitive aminopeptidase (PSA) (EC 3.4.11.14) (Cytosol alanyl aminopeptidase) (AAP-S)	cellular response to hypoxia [GO:0071456]; peptide catabolic process [GO:0043171]; positive regulation of protein targeting to mitochondrion [GO:1903955]; protein polyubiquitination [GO:0000209]; proteolysis [GO:0006508]	cytoplasm [GO:0005737]; cytosol [GO:0005829]; extracellular exosome [GO:0070062]; nucleus [GO:0005634]	aminopeptidase activity [GO:0004177]; metalloaminopeptidase activity [GO:0070006]; peptide binding [GO:0042277]; zinc ion binding [GO:0008270]	NPEPPS	Homo sapiens (Human)	919	103276	SUBCELLULAR LOCATION: Cytoplasm, cytosol {ECO:0000269|PubMed:10978616}. Nucleus {ECO:0000305}.
N : D63G	P61970	P61970	3|5|3|4	15	3.75	4	0|0|0|0|0|0|0|0|0|0|0|0|0|0|0|0	1	1	1	1	1	4.83	37.5	0		TRUE	P61970	NUTF2	1	1	4	68	5.88235	TRUE	P61970	NTF2_HUMAN	Nuclear transport factor 2 (NTF-2) (Placental protein 15) (PP15)	mRNA transport [GO:0051028]; nucleocytoplasmic transport [GO:0006913]; protein export from nucleus [GO:0006611]; protein import into nucleus [GO:0006606]; protein localization to nuclear pore [GO:0090204]	cytosol [GO:0005829]; extracellular exosome [GO:0070062]; nuclear inner membrane [GO:0005637]; nuclear membrane [GO:0031965]; nuclear outer membrane [GO:0005640]; nuclear pore central transport channel [GO:0044613]; nucleoplasm [GO:0005654]	identical protein binding [GO:0042802]; small GTPase binding [GO:0031267]; structural constituent of nuclear pore [GO:0017056]	NUTF2	Homo sapiens (Human)	127	14478	SUBCELLULAR LOCATION: Cytoplasm, cytosol {ECO:0000269|PubMed:10679025, ECO:0000269|PubMed:7744965}. Nucleus outer membrane {ECO:0000250|UniProtKB:P61972}. Nucleus, nuclear pore complex {ECO:0000250|UniProtKB:P61972}. Nucleus inner membrane {ECO:0000250|UniProtKB:P61972}. Nucleus, nucleoplasm {ECO:0000269|PubMed:10679025}. Note=At steady state it is essentially nucleoplasmic, enriched in nucleopla…
N : D63G	P68402	P68402	2|6|2|2	12	3	4	0|0|0|0|0|0|0|0|0|0|0|0|0|0|0|0	0.96	1	0.96	1	0.96	2.98	30	0.01		TRUE	P68402	PAFAH1B2	2	2	2	68	2.94118	TRUE	P68402	PA1B2_HUMAN	Platelet-activating factor acetylhydrolase IB subunit alpha2 (EC 3.1.1.47) (PAF acetylhydrolase 30 kDa subunit) (PAF-AH 30 kDa subunit) (PAF-AH subunit beta) (PAFAH subunit beta)	brain development [GO:0007420]; lipid catabolic process [GO:0016042]; lipid metabolic process [GO:0006629]; positive regulation of macroautophagy [GO:0016239]; spermatogenesis [GO:0007283]	1-alkyl-2-acetylglycerophosphocholine esterase complex [GO:0008247]; cytoplasm [GO:0005737]; cytosol [GO:0005829]; extracellular exosome [GO:0070062]; extracellular region [GO:0005576]; fibrillar center [GO:0001650]; ficolin-1-rich granule lumen [GO:1904813]; nucleolus [GO:0005730]; plasma membrane [GO:0005886]; secretory granule lumen [GO:0034774]	1-alkyl-2-acetylglycerophosphocholine esterase activity [GO:0003847]; platelet-activating factor acetyltransferase activity [GO:0047179]; protein heterodimerization activity [GO:0046982]; protein homodimerization activity [GO:0042803]; protein-containing complex binding [GO:0044877]	PAFAH1B2	Homo sapiens (Human)	229	25569	SUBCELLULAR LOCATION: Cytoplasm.
N : D63G	P82909	P82909	8|3|9|9	29	7.25	4	0|0|0|2|1|0|0|0|0|0|0|0|0|0|0|0	0.99	1	0.99	1	0.99	2.96	38.67	0		TRUE	P82909	MRPS36	4	1.73684	19	68	27.9412	TRUE	P82909	KGD4_HUMAN	Alpha-ketoglutarate dehydrogenase component 4	2-oxoglutarate metabolic process [GO:0006103]; tricarboxylic acid cycle [GO:0006099]	mitochondrial inner membrane [GO:0005743]; mitochondrial oxoglutarate dehydrogenase complex [GO:0009353]; mitochondrion [GO:0005739]		MRPS36	Homo sapiens (Human)	103	11466	SUBCELLULAR LOCATION: Mitochondrion {ECO:0000250|UniProtKB:P82908}.
N : D63G	Q08257	Q08257	12|7|9|7	35	8.75	4	0|0|0|0|0|0|0|0|0|0|0|0|0|1|1|0	1	1	1	1	1	11.01	70	0		TRUE	Q08257	CRYZ	2	1.14286	7	68	10.2941	TRUE	Q08257	QOR_HUMAN	Quinone oxidoreductase (EC 1.6.5.5) (NADPH:quinone reductase) (Zeta-crystallin)	protein homotetramerization [GO:0051289]; visual perception [GO:0007601]; xenobiotic catabolic process [GO:0042178]	cytosol [GO:0005829]; extracellular exosome [GO:0070062]	identical protein binding [GO:0042802]; mRNA 3'-UTR binding [GO:0003730]; NADPH binding [GO:0070402]; NADPH:quinone reductase activity [GO:0003960]; zinc ion binding [GO:0008270]	CRYZ	Homo sapiens (Human)	329	35207	SUBCELLULAR LOCATION: Cytoplasm {ECO:0000269|PubMed:20103721}.
N : D63G	Q12849	Q12849	33|35|17|27	112	28	4	0|0|0|0|0|0|1|0|0|0|0|0|0|1|0|0	1	1	1	1	1	26.23	224	0		TRUE	Q12849	GRSF1	5	2	33	68	48.5294	TRUE	Q12849	GRSF1_HUMAN	G-rich sequence factor 1 (GRSF-1)	anterior/posterior pattern specification [GO:0009952]; morphogenesis of embryonic epithelium [GO:0016331]; mRNA polyadenylation [GO:0006378]; positive regulation of mitochondrial RNA catabolic process [GO:0000962]; regulation of RNA splicing [GO:0043484]; tRNA processing [GO:0008033]	cytoplasm [GO:0005737]; mitochondrial nucleoid [GO:0042645]; mitochondrion [GO:0005739]; nucleoplasm [GO:0005654]; ribonucleoprotein complex [GO:1990904]; ribonucleoprotein granule [GO:0035770]	mRNA binding [GO:0003729]; RNA binding [GO:0003723]	GRSF1	Homo sapiens (Human)	480	53126	SUBCELLULAR LOCATION: [Isoform 1]: Mitochondrion matrix {ECO:0000269|PubMed:23473033, ECO:0000269|PubMed:23473034, ECO:0000269|PubMed:25683715, ECO:0000269|PubMed:29967381}. Note=Localizes to mitochondrial RNA granules found in close proximity to the mitochondrial nucleoids. {ECO:0000269|PubMed:23473033, ECO:0000269|PubMed:23473034, ECO:0000269|PubMed:25683715}.; SUBCELLULAR LOCATION: [Isoform 2]…
N : D63G	Q12926	Q12926	5|4|5|5	19	4.75	4	0|0|0|2|0|1|3|1|3|0|0|0|0|0|0|0	0.88	0.9	0.88	0.9	0.88	1.41	7.6	0.02		TRUE	Q12926	ELAVL2	1	1	9	68	13.2353	TRUE	Q12926	ELAV2_HUMAN	ELAV-like protein 2 (ELAV-like neuronal protein 1) (Hu-antigen B) (HuB) (Nervous system-specific RNA-binding protein Hel-N1)	regulation of DNA-templated transcription [GO:0006355]	nucleoplasm [GO:0005654]; ribonucleoprotein complex [GO:1990904]	mRNA 3'-UTR binding [GO:0003730]; RNA binding [GO:0003723]	ELAVL2	Homo sapiens (Human)	359	39504
N : D63G	Q14249	Q14249	5|6|7|4	22	5.5	4	0|0|0|0|0|0|0|0|0|0|0|0|0|0|0|0	1	1	1	1	1	6.57	55	0		TRUE	Q14249	ENDOG	1	1	6	68	8.82353	TRUE	Q14249	NUCG_HUMAN	Endonuclease G, mitochondrial (Endo G) (EC 3.1.30.-)	aging [GO:0007568]; apoptotic DNA fragmentation [GO:0006309]; cellular response to calcium ion [GO:0071277]; cellular response to glucose stimulus [GO:0071333]; cellular response to hypoxia [GO:0071456]; DNA recombination [GO:0006310]; in utero embryonic development [GO:0001701]; mitochondrial DNA catabolic process [GO:0032043]; negative regulation of TOR signaling [GO:0032007]; neuron death in r…	cytosol [GO:0005829]; mitochondrial inner membrane [GO:0005743]; mitochondrion [GO:0005739]; nucleus [GO:0005634]; perikaryon [GO:0043204]	endodeoxyribonuclease activity [GO:0004520]; endonuclease activity [GO:0004519]; endoribonuclease activity [GO:0004521]; magnesium ion binding [GO:0000287]; nucleic acid binding [GO:0003676]; protein homodimerization activity [GO:0042803]; single-stranded DNA endodeoxyribonuclease activity [GO:0000014]	ENDOG	Homo sapiens (Human)	297	32620	SUBCELLULAR LOCATION: Mitochondrion {ECO:0000269|PubMed:33473107}.
N : D63G	Q14558	Q14558	2|4|3|4	13	3.25	4	0|0|0|1|0|0|0|0|0|0|0|0|0|0|0|0	0.99	1	0.99	1	0.99	2.98	32.5	0		TRUE	Q14558	PRPSAP1	5	4.33333	3	68	4.41176	TRUE	Q14558	KPRA_HUMAN	Phosphoribosyl pyrophosphate synthase-associated protein 1 (PRPP synthase-associated protein 1) (39 kDa phosphoribosypyrophosphate synthase-associated protein) (PAP39)	5-phosphoribose 1-diphosphate biosynthetic process [GO:0006015]; nucleobase-containing compound metabolic process [GO:0006139]; purine nucleotide biosynthetic process [GO:0006164]	cytoplasm [GO:0005737]; ribose phosphate diphosphokinase complex [GO:0002189]	enzyme inhibitor activity [GO:0004857]; identical protein binding [GO:0042802]; magnesium ion binding [GO:0000287]; ribose phosphate diphosphokinase activity [GO:0004749]	PRPSAP1	Homo sapiens (Human)	356	39394
N : D63G	Q15032	Q15032	12|16|14|15	57	14.25	4	0|2|0|0|0|0|0|0|0|2|1|3|0|0|0|0	1	1	1	1	1	7.9	28.5	0		TRUE	Q15032	R3HDM1	3	1.66667	15	68	22.0588	TRUE	Q15032	R3HD1_HUMAN	R3H domain-containing protein 1			RNA binding [GO:0003723]	R3HDM1	Homo sapiens (Human)	1099	120696
N : D63G	Q3BBV0	Q3BBV0	7|5|9|4	25	6.25	4	0|0|0|0|0|0|0|0|0|0|0|0|0|0|0|0	1	1	1	1	1	6.57	62.5	0		TRUE	Q3BBV0	NBPF1	1	1	1	68	1.47059	TRUE	Q3BBV0	NBPF1_HUMAN	Neuroblastoma breakpoint family member 1		cytoplasm [GO:0005737]		NBPF1	Homo sapiens (Human)	1214	139258	SUBCELLULAR LOCATION: Cytoplasm {ECO:0000269|PubMed:16079250}.
N : D63G	Q53GS7	Q53GS7	11|11|8|10	40	10	4	0|0|0|0|0|0|0|0|0|1|0|2|0|2|0|0	1	1	1	1	1	7.05	32	0		TRUE	Q53GS7	GLE1	2	1.54545	11	68	16.1765	TRUE	Q53GS7	GLE1_HUMAN	mRNA export factor GLE1 (hGLE1) (GLE1 RNA export mediator) (GLE1-like protein) (Nucleoporin GLE1)	mRNA export from nucleus [GO:0006406]; nucleocytoplasmic transport [GO:0006913]; poly(A)+ mRNA export from nucleus [GO:0016973]; protein transport [GO:0015031]; regulation of translational initiation [GO:0006446]; regulation of translational termination [GO:0006449]	centriole [GO:0005814]; centrosome [GO:0005813]; ciliary basal body [GO:0036064]; cytoplasm [GO:0005737]; cytosol [GO:0005829]; extracellular space [GO:0005615]; membrane [GO:0016020]; nuclear envelope [GO:0005635]; nuclear membrane [GO:0031965]; nuclear pore [GO:0005643]; nuclear pore cytoplasmic filaments [GO:0044614]; nucleolus [GO:0005730]	identical protein binding [GO:0042802]; inositol hexakisphosphate binding [GO:0000822]; phospholipid binding [GO:0005543]; translation initiation factor binding [GO:0031369]	GLE1	Homo sapiens (Human)	698	79836	SUBCELLULAR LOCATION: Nucleus {ECO:0000269|PubMed:12668658}. Cytoplasm {ECO:0000269|PubMed:12668658}. Note=Shuttles between the nucleus and the cytoplasm (PubMed:12668658). Shuttling is essential for its mRNA export function (PubMed:12668658). {ECO:0000269|PubMed:12668658}.; SUBCELLULAR LOCATION: [Isoform 1]: Cytoplasm {ECO:0000269|PubMed:12668658}. Nucleus, nuclear pore complex {ECO:0000269|PubM…
N : D63G	Q5T749	Q5T749	9|7|5|4	25	6.25	4	0|0|0|0|0|0|0|0|0|0|0|0|0|0|0|0	1	1	1	1	1	6.57	62.5	0		TRUE	Q5T749	KPRP	1	1	5	68	7.35294	TRUE	Q5T749	KPRP_HUMAN	Keratinocyte proline-rich protein (hKPRP)		cytoplasm [GO:0005737]; extracellular exosome [GO:0070062]		KPRP	Homo sapiens (Human)	579	64136	SUBCELLULAR LOCATION: Cytoplasm {ECO:0000250}.
N : D63G	Q5TAX3	Q5TAX3	13|12|18|13	56	14	4	3|1|3|0|0|0|0|0|0|2|1|0|3|3|0|0	1	1	1	1	1	6.64	14	0		TRUE	Q5TAX3	TUT4	4	1.68	25	68	36.7647	TRUE	Q5TAX3	TUT4_HUMAN	Terminal uridylyltransferase 4 (TUTase 4) (EC 2.7.7.52) (Zinc finger CCHC domain-containing protein 11)	miRNA catabolic process [GO:0010587]; miRNA metabolic process [GO:0010586]; negative regulation of transposition, RNA-mediated [GO:0010526]; nuclear-transcribed mRNA poly(A) tail shortening [GO:0000289]; oocyte maturation [GO:0001556]; polyuridylation-dependent mRNA catabolic process [GO:1990074]; pre-miRNA processing [GO:0031054]; RNA 3' uridylation [GO:0071076]; RNA 3'-end processing [GO:003112…	cytoplasm [GO:0005737]; cytoplasmic ribonucleoprotein granule [GO:0036464]; cytosol [GO:0005829]; extracellular exosome [GO:0070062]; extracellular space [GO:0005615]; nucleolus [GO:0005730]	miRNA binding [GO:0035198]; nucleotidyltransferase activity [GO:0016779]; RNA binding [GO:0003723]; RNA uridylyltransferase activity [GO:0050265]; zinc ion binding [GO:0008270]	TUT4	Homo sapiens (Human)	1644	185166	SUBCELLULAR LOCATION: Nucleus {ECO:0000269|PubMed:16643855}. Cytoplasm {ECO:0000269|PubMed:16643855, ECO:0000269|PubMed:19703396, ECO:0000269|PubMed:25480299}. Cytoplasm, Cytoplasmic ribonucleoprotein granule {ECO:0000269|PubMed:30122351}. Note=Mainly cytoplasmic (PubMed:19703396, PubMed:25480299). Translocates into the cytoplasm following treatment of the cell with LPS (PubMed:16643855). Co-enri…
N : D63G	Q659C4	Q659C4	15|13|10|10	48	12	4	1|1|2|0|0|0|0|0|0|3|1|2|4|3|2|5	0.99	1	0.99	1	0.99	4.04	8	0		TRUE	Q659C4	LARP1B	7	2.57576	33	68	48.5294	TRUE	Q659C4	LAR1B_HUMAN	La-related protein 1B (La ribonucleoprotein domain family member 1B) (La ribonucleoprotein domain family member 2) (La-related protein 2)	positive regulation of translation [GO:0045727]	cytoplasmic stress granule [GO:0010494]; cytosol [GO:0005829]; nucleus [GO:0005634]	RNA binding [GO:0003723]	LARP1B	Homo sapiens (Human)	914	105322
N : D63G	Q6PI48	Q6PI48	10|5|8|6	29	7.25	4	0|0|0|1|1|1|1|2|1|1|0|0|1|0|0|0	0.99	1	0.99	1	0.99	3.76	12.89	0		TRUE	Q6PI48	DARS2	6	2.14286	28	68	41.1765	TRUE	Q6PI48	SYDM_HUMAN	Aspartate--tRNA ligase, mitochondrial (EC 6.1.1.12) (Aspartyl-tRNA synthetase) (AspRS)	aspartyl-tRNA aminoacylation [GO:0006422]; mitochondrial asparaginyl-tRNA aminoacylation [GO:0070145]; tRNA aminoacylation [GO:0043039]	mitochondrial matrix [GO:0005759]; mitochondrion [GO:0005739]; nucleoplasm [GO:0005654]	aspartate-tRNA ligase activity [GO:0004815]; aspartate-tRNA(Asn) ligase activity [GO:0050560]; ATP binding [GO:0005524]; protein homodimerization activity [GO:0042803]; tRNA binding [GO:0000049]	DARS2	Homo sapiens (Human)	645	73563	SUBCELLULAR LOCATION: Mitochondrion matrix {ECO:0000269|PubMed:15779907}.
N : D63G	Q6ZN17	Q6ZN17	20|19|8|6	53	13.25	4	0|0|0|0|0|0|3|1|0|0|0|0|0|0|1|0	1	1	1	1	1	4.28	42.4	0		TRUE	Q6ZN17	LIN28B	11	2.69231	26	68	38.2353	TRUE	Q6ZN17	LN28B_HUMAN	Protein lin-28 homolog B (Lin-28B)	miRNA catabolic process [GO:0010587]; negative regulation of pre-miRNA processing [GO:2000632]; negative regulation of primary miRNA processing [GO:2000635]; positive regulation of miRNA catabolic process [GO:2000627]; pre-miRNA processing [GO:0031054]; RNA 3'-end processing [GO:0031123]; RNA destabilization [GO:0050779]	cytoplasm [GO:0005737]; cytosol [GO:0005829]; nucleolus [GO:0005730]; nucleoplasm [GO:0005654]; nucleus [GO:0005634]	mRNA binding [GO:0003729]; RNA binding [GO:0003723]; sequence-specific double-stranded DNA binding [GO:1990837]; zinc ion binding [GO:0008270]	LIN28B	Homo sapiens (Human)	250	27084	SUBCELLULAR LOCATION: Nucleus. Nucleus, nucleolus {ECO:0000269|PubMed:22118463}. Cytoplasm {ECO:0000269|PubMed:16971064}. Note=Predominantly nucleolar (PubMed:22118463). In Huh7 cells, predominantly cytoplasmic, with only a subset of cells exhibiting strong nuclear staining; however, the specificity of the polyclonal antibody used in these experiments has not been not documented (PubMed:16971064)…
N : D63G	Q86U90	Q86U90	4|2|2|3	11	2.75	4	0|0|0|0|1|0|1|0|0|0|0|0|0|0|0|0	0.96	1	0.96	1	0.96	2.59	22	0.01		TRUE								TRUE	Q86U90	YRDC_HUMAN	Threonylcarbamoyl-AMP synthase (EC 2.7.7.87) (Dopamine receptor-interacting protein 3) (Ischemia/reperfusion-inducible protein homolog) (hIRIP)	negative regulation of transport [GO:0051051]; regulation of translational fidelity [GO:0006450]; tRNA threonylcarbamoyladenosine modification [GO:0002949]	cytoplasm [GO:0005737]; mitochondrion [GO:0005739]; plasma membrane [GO:0005886]	double-stranded RNA binding [GO:0003725]; L-threonylcarbamoyladenylate synthase [GO:0061710]; nucleotidyltransferase activity [GO:0016779]; tRNA binding [GO:0000049]	YRDC	Homo sapiens (Human)	279	29328	SUBCELLULAR LOCATION: Cytoplasm {ECO:0000269|PubMed:29760464}. Mitochondrion {ECO:0000269|PubMed:29760464}. Cell membrane {ECO:0000250|UniProtKB:Q3U5F4}; Peripheral membrane protein {ECO:0000250|UniProtKB:Q3U5F4}. Note=A large fraction localizes in the cytoplasm, whereas a smaller fraction is imported to mitochondria. {ECO:0000269|PubMed:29760464}.
N : D63G	Q8IUX4	Q8IUX4	4|2|3|4	13	3.25	4	0|0|0|0|1|0|0|1|0|0|0|0|0|0|0|0	0.98	1	0.98	1	0.98	2.59	26	0		TRUE	Q8IUX4	APOBEC3F	2	1.16667	6	68	8.82353	TRUE	Q8IUX4	ABC3F_HUMAN	DNA dC->dU-editing enzyme APOBEC-3F (EC 3.5.4.38) (Apolipoprotein B mRNA-editing enzyme catalytic polypeptide-like 3F) (A3F)	base conversion or substitution editing [GO:0016553]; cytidine to uridine editing [GO:0016554]; defense response to virus [GO:0051607]; DNA cytosine deamination [GO:0070383]; DNA demethylation [GO:0080111]; innate immune response [GO:0045087]; negative regulation of single stranded viral RNA replication via double stranded DNA intermediate [GO:0045869]; negative regulation of transposition [GO:00…	apolipoprotein B mRNA editing enzyme complex [GO:0030895]; cytoplasm [GO:0005737]; nucleus [GO:0005634]; P-body [GO:0000932]; ribonucleoprotein complex [GO:1990904]	cytidine deaminase activity [GO:0004126]; deoxycytidine deaminase activity [GO:0047844]; identical protein binding [GO:0042802]; RNA binding [GO:0003723]; zinc ion binding [GO:0008270]	APOBEC3F	Homo sapiens (Human)	373	45020	SUBCELLULAR LOCATION: Cytoplasm. Cytoplasm, P-body.
N : D63G	Q8NHU6	Q8NHU6	10|13|11|8	42	10.5	4	0|0|1|0|0|0|0|0|0|0|1|0|1|0|0|0	1	1	1	1	1	11.53	56	0		TRUE	Q8NHU6	TDRD7	2	1.06667	15	68	22.0588	TRUE	Q8NHU6	TDRD7_HUMAN	Tudor domain-containing protein 7 (PCTAIRE2-binding protein) (Tudor repeat associator with PCTAIRE-2) (Trap)	lens fiber cell differentiation [GO:0070306]; lens morphogenesis in camera-type eye [GO:0002089]; P granule organization [GO:0030719]; piRNA processing [GO:0034587]; post-transcriptional regulation of gene expression [GO:0010608]; spermatogenesis [GO:0007283]	chromatoid body [GO:0033391]; cytoplasm [GO:0005737]; mitochondrial matrix [GO:0005759]; P granule [GO:0043186]; ribonucleoprotein granule [GO:0035770]	mRNA binding [GO:0003729]; protein N-terminus binding [GO:0047485]	TDRD7	Homo sapiens (Human)	1098	123586	SUBCELLULAR LOCATION: Cytoplasm {ECO:0000269|PubMed:21436445}. Note=Localizes to cytoplasmic RNA granules. Present in chromatoid body (CB) of spermatids (mammalian counterpart of germplasm, pole plasm or polar granules in Drosophila germ cells), also named processing bodies (P-bodies) in somatic cells. Detected in the multilobular cytoplasmic CBs (also called intermitochondrial cementin) in pachy…
N : D63G	Q8WU79	Q8WU79	8|7|7|11	33	8.25	4	0|2|0|0|0|0|0|0|0|0|0|0|1|1|1|0	1	1	1	1	1	9.6	26.4	0		TRUE	Q8WU79	SMAP2	5	1.66667	27	68	39.7059	TRUE	Q8WU79	SMAP2_HUMAN	Stromal membrane-associated protein 2 (Stromal membrane-associated protein 1-like)		cytosol [GO:0005829]; nucleoplasm [GO:0005654]	GTPase activator activity [GO:0005096]; metal ion binding [GO:0046872]	SMAP2	Homo sapiens (Human)	429	46786	SUBCELLULAR LOCATION: Cytoplasm. Note=Detected in multiple foci throughout the cytoplasm and in juxtanuclear structures. {ECO:0000250}.
N : D63G	Q93073	Q93073	7|10|8|8	33	8.25	4	0|0|0|0|0|0|0|0|0|0|0|0|0|0|0|0	1	1	1	1	1	11.49	82.5	0		TRUE								TRUE	Q93073	SBP2L_HUMAN	Selenocysteine insertion sequence-binding protein 2-like (SECIS-binding protein 2-like)	selenocysteine incorporation [GO:0001514]	ribonucleoprotein complex [GO:1990904]	mRNA 3'-UTR binding [GO:0003730]; ribonucleoprotein complex binding [GO:0043021]; RNA binding [GO:0003723]; selenocysteine insertion sequence binding [GO:0035368]	SECISBP2L	Homo sapiens (Human)	1101	121776
N : D63G	Q96L92	Q96L92	3|2|4|3	12	3	4	1|0|1|0|0|0|0|0|0|1|0|0|0|0|0|0	0.95	0.99	0.95	0.99	0.95	1.8	16	0.01		TRUE	Q96L92	SNX27	2	1.15385	13	68	19.1176	TRUE	Q96L92	SNX27_HUMAN	Sorting nexin-27	endocytic recycling [GO:0032456]; endosomal transport [GO:0016197]; endosome to lysosome transport [GO:0008333]; establishment of natural killer cell polarity [GO:0001770]; intracellular protein transport [GO:0006886]; regulation of postsynaptic membrane neurotransmitter receptor levels [GO:0099072]; signal transduction [GO:0007165]	cytosol [GO:0005829]; early endosome [GO:0005769]; early endosome membrane [GO:0031901]; endosome [GO:0005768]; glutamatergic synapse [GO:0098978]; immunological synapse [GO:0001772]; Schaffer collateral - CA1 synapse [GO:0098685]	phosphatidylinositol binding [GO:0035091]; phosphatidylinositol-3-phosphate binding [GO:0032266]	SNX27	Homo sapiens (Human)	541	61265	SUBCELLULAR LOCATION: Early endosome membrane; Peripheral membrane protein. Cytoplasm, cytosol. Note=Localizes to immunological synapse in T-cells. In T-cells, recruited from the cytosol to sorting endosomes by phosphoinositide-3-kinase products.
N : D63G	Q96T21	Q96T21	11|8|10|9	38	9.5	4	1|1|2|0|0|1|0|0|0|4|2|3|2|2|3|2	1	1	1	1	1	4.86	6.61	0		TRUE	Q96T21	SECISBP2	3	1.62069	29	68	42.6471	TRUE	Q96T21	SEBP2_HUMAN	Selenocysteine insertion sequence-binding protein 2 (SECIS-binding protein 2)	forebrain neuron development [GO:0021884]; negative regulation of nuclear-transcribed mRNA catabolic process, nonsense-mediated decay [GO:2000623]; selenocysteine incorporation [GO:0001514]; striatum development [GO:0021756]	mitochondrion [GO:0005739]; nucleoplasm [GO:0005654]; ribonucleoprotein complex [GO:1990904]	DNA binding [GO:0003677]; mRNA 3'-UTR binding [GO:0003730]; ribonucleoprotein complex binding [GO:0043021]; RNA binding [GO:0003723]; selenocysteine insertion sequence binding [GO:0035368]	SECISBP2	Homo sapiens (Human)	854	95462	SUBCELLULAR LOCATION: [Isoform 1]: Nucleus {ECO:0000305}.; SUBCELLULAR LOCATION: [Isoform 2]: Mitochondrion {ECO:0000269|PubMed:19004874}.
N : D63G	Q9BTV5	Q9BTV5	9|7|8|6	30	7.5	4	0|0|0|1|3|1|1|0|0|0|0|0|3|1|0|0	0.98	1	0.98	1	0.98	3.28	12	0		TRUE	Q9BTV5	FSD1	5	2.29167	24	68	35.2941	TRUE	Q9BTV5	FSD1_HUMAN	Fibronectin type III and SPRY domain-containing protein 1 (MID1-related protein 1) (Microtubule-associated protein GLFND)	cell cycle [GO:0007049]; cell division [GO:0051301]; cytoplasmic microtubule organization [GO:0031122]; regulation of cell division [GO:0051302]; regulation of cytokinesis [GO:0032465]; regulation of mitotic spindle organization [GO:0060236]	centrosome [GO:0005813]; cleavage furrow [GO:0032154]; cytoplasm [GO:0005737]; microtubule [GO:0005874]; nucleus [GO:0005634]	identical protein binding [GO:0042802]; microtubule binding [GO:0008017]	FSD1	Homo sapiens (Human)	496	55820	SUBCELLULAR LOCATION: Cytoplasm, cytoskeleton, microtubule organizing center, centrosome. Nucleus. Cytoplasm. Cleavage furrow. Note=Cell-cycle-dependent association with the centrosome. Colocalizes with a subpopulation of microtubules. Does not associate with microtubules during mitosis but reassociates with microtubules during cytokinesis. Localizes to the central portions of a small subset of m…
N : D63G	Q9C0B9	Q9C0B9	12|7|6|8	33	8.25	4	0|0|0|0|0|0|0|0|0|0|0|0|1|0|0|0	1	1	1	1	1	9.89	82.5	0		TRUE	Q9C0B9	ZCCHC2	2	1.09091	11	68	16.1765	TRUE	Q9C0B9	ZCHC2_HUMAN	Zinc finger CCHC domain-containing protein 2		cytoplasm [GO:0005737]	nucleic acid binding [GO:0003676]; phosphatidylinositol binding [GO:0035091]; zinc ion binding [GO:0008270]	ZCCHC2	Homo sapiens (Human)	1178	125936
N : D63G	Q9H0J9	Q9H0J9	7|7|2|2	18	4.5	4	0|0|0|0|0|0|0|0|0|0|0|0|0|0|0|0	0.98	1	0.98	1	0.98	2.98	45	0		TRUE	Q9H0J9	PARP12	2	1.33333	3	68	4.41176	TRUE	Q9H0J9	PAR12_HUMAN	Protein mono-ADP-ribosyltransferase PARP12 (EC 2.4.2.-) (ADP-ribosyltransferase diphtheria toxin-like 12) (ARTD12) (Poly [ADP-ribose] polymerase 12) (PARP-12) (Zinc finger CCCH domain-containing protein 1)	protein auto-ADP-ribosylation [GO:0070213]	nucleus [GO:0005634]	metal ion binding [GO:0046872]; NAD+ ADP-ribosyltransferase activity [GO:0003950]; NAD+- protein-cysteine ADP-ribosyltransferase activity [GO:0140803]; NAD+-protein ADP-ribosyltransferase activity [GO:1990404]; nucleotidyltransferase activity [GO:0016779]; RNA binding [GO:0003723]	PARP12	Homo sapiens (Human)	701	79064	SUBCELLULAR LOCATION: Nucleus {ECO:0000305}.
N : D63G	Q9H3H3	Q9H3H3	8|6|9|10	33	8.25	4	0|0|0|0|0|0|0|0|0|0|0|0|0|0|0|0	1	1	1	1	1	9.89	82.5	0		TRUE								TRUE	Q9H3H3	CK068_HUMAN	UPF0696 protein C11orf68 (Basophilic leukemia-expressed protein Bles03) (Protein p5326)			RNA binding [GO:0003723]	C11orf68	Homo sapiens (Human)	292	31430
N : D63G	Q9H7E2	Q9H7E2	8|6|9|7	30	7.5	4	1|2|1|0|0|0|0|0|0|3|2|3|1|2|0|0	0.98	1	0.98	1	0.98	3	8	0		TRUE	Q9H7E2	TDRD3	7	1.85185	27	68	39.7059	TRUE	Q9H7E2	TDRD3_HUMAN	Tudor domain-containing protein 3	chromatin organization [GO:0006325]; DNA topological change [GO:0006265]	cytosol [GO:0005829]; DNA topoisomerase III-beta-TDRD3 complex [GO:0140225]; Golgi apparatus [GO:0005794]; nucleoplasm [GO:0005654]; nucleus [GO:0005634]	chromatin binding [GO:0003682]; methylated histone binding [GO:0035064]; RNA binding [GO:0003723]; transcription coactivator activity [GO:0003713]	TDRD3	Homo sapiens (Human)	651	73185	SUBCELLULAR LOCATION: Cytoplasm {ECO:0000269|PubMed:18632687}. Nucleus {ECO:0000269|PubMed:21172665}. Note=Predominantly cytoplasmic. Associated with actively translating polyribosomes and with mRNA stress granules. {ECO:0000269|PubMed:18632687, ECO:0000269|PubMed:18664458}.
N : D63G	Q9H9G7	Q9H9G7	13|13|10|19	55	13.75	4	1|1|2|0|0|0|0|0|0|2|3|2|0|0|2|2	1	1	1	1	1	9.04	14.67	0		TRUE	Q9H9G7	AGO3	9	2.47059	17	68	25	TRUE	Q9H9G7	AGO3_HUMAN	Protein argonaute-3 (Argonaute3) (hAgo3) (EC 3.1.26.n2) (Argonaute RISC catalytic component 3) (Eukaryotic translation initiation factor 2C 3) (eIF-2C 3) (eIF2C 3)	miRNA processing [GO:0035196]; miRNA-mediated gene silencing by inhibition of translation [GO:0035278]; mRNA catabolic process [GO:0006402]; positive regulation of gene expression [GO:0010628]; positive regulation of NIK/NF-kappaB signaling [GO:1901224]; pre-miRNA processing [GO:0031054]; regulation of stem cell proliferation [GO:0072091]; RISC complex assembly [GO:0070922]; RNA secondary structu…	condensed nuclear chromosome [GO:0000794]; cytoplasm [GO:0005737]; cytoplasmic ribonucleoprotein granule [GO:0036464]; cytosol [GO:0005829]; membrane [GO:0016020]; nucleoplasm [GO:0005654]; P-body [GO:0000932]; RISC complex [GO:0016442]; RISC-loading complex [GO:0070578]	double-stranded RNA binding [GO:0003725]; endoribonuclease activity [GO:0004521]; endoribonuclease activity, cleaving miRNA-paired mRNA [GO:0090624]; metal ion binding [GO:0046872]; miRNA binding [GO:0035198]; RNA binding [GO:0003723]; single-stranded RNA binding [GO:0003727]	AGO3	Homo sapiens (Human)	860	97360	SUBCELLULAR LOCATION: Cytoplasm, P-body {ECO:0000255|HAMAP-Rule:MF_03032, ECO:0000269|PubMed:16081698}.
N : D63G	Q9NQ86	Q9NQ86	2|3|2|2	9	2.25	4	0|0|1|0|0|0|0|0|0|0|0|4|0|0|0|0	0.78	0.87	0.78	0.87	0.78	1.09	7.2	0.04		TRUE	Q9NQ86	TRIM36	2	1.2	10	68	14.7059	TRUE	Q9NQ86	TRI36_HUMAN	E3 ubiquitin-protein ligase TRIM36 (EC 2.3.2.27) (RING finger protein 98) (RING-type E3 ubiquitin transferase TRIM36) (Tripartite motif-containing protein 36) (Zinc-binding protein Rbcc728)	acrosome reaction [GO:0007340]; mitotic cytokinesis [GO:0000281]; regulation of cell cycle [GO:0051726]; regulation of microtubule cytoskeleton organization [GO:0070507]; spindle organization [GO:0007051]	acrosomal vesicle [GO:0001669]; cytoplasm [GO:0005737]; cytoskeleton [GO:0005856]; cytosol [GO:0005829]	alpha-tubulin binding [GO:0043014]; ubiquitin-protein transferase activity [GO:0004842]; zinc ion binding [GO:0008270]	TRIM36	Homo sapiens (Human)	728	83013	SUBCELLULAR LOCATION: Cytoplasm {ECO:0000269|PubMed:28087737}. Cytoplasmic vesicle, secretory vesicle, acrosome {ECO:0000250|UniProtKB:Q80WG7}. Cytoplasm, cytoskeleton {ECO:0000250|UniProtKB:Q80WG7}. Note=Found in the acrosomal region of elongated spermatids and mature sperm. {ECO:0000250|UniProtKB:Q80WG7}.
N : D63G	Q9NQR4	Q9NQR4	3|8|5|7	23	5.75	4	2|1|1|0|0|0|0|0|0|1|1|1|5|2|1|0	0.8	0.98	0.8	0.98	0.8	-0.2	6.13	0.03		TRUE	Q9NQR4	NIT2	5	1.57143	21	68	30.8824	TRUE	Q9NQR4	NIT2_HUMAN	Omega-amidase NIT2 (EC 3.5.1.3) (Nitrilase homolog 2)	asparagine metabolic process [GO:0006528]; glutamine metabolic process [GO:0006541]; oxaloacetate metabolic process [GO:0006107]	centrosome [GO:0005813]; cytosol [GO:0005829]; extracellular exosome [GO:0070062]; extracellular region [GO:0005576]; specific granule lumen [GO:0035580]; tertiary granule lumen [GO:1904724]	2-oxoglutaramate amidase activity [GO:0106008]; omega-amidase activity [GO:0050152]	NIT2	Homo sapiens (Human)	276	30608	SUBCELLULAR LOCATION: Cytoplasm {ECO:0000269|PubMed:17488281}.
N : D63G	Q9NQS1	Q9NQS1	4|5|5|9	23	5.75	4	3|3|3|0|0|0|0|0|0|2|2|1|1|2|2|2	0.76	1	0.76	1	0.76	-0.07	4.38	0.04		TRUE	Q9NQS1	AVEN	3	1.5	32	68	47.0588	TRUE	Q9NQS1	AVEN_HUMAN	Cell death regulator Aven	apoptotic process [GO:0006915]; negative regulation of apoptotic process [GO:0043066]; negative regulation of G2/M transition of mitotic cell cycle [GO:0010972]	cytosol [GO:0005829]; endomembrane system [GO:0012505]; membrane [GO:0016020]		AVEN	Homo sapiens (Human)	362	38506	SUBCELLULAR LOCATION: Endomembrane system; Peripheral membrane protein. Note=Associated with intracellular membranes.
N : D63G	Q9NSE4	Q9NSE4	18|17|17|14	66	16.5	4	4|3|4|0|0|0|1|0|2|5|4|2|1|2|1|3	1	1	1	1	1	7.59	8.25	0		TRUE	Q9NSE4	IARS2	5	2.25	32	68	47.0588	TRUE	Q9NSE4	SYIM_HUMAN	Isoleucine--tRNA ligase, mitochondrial (EC 6.1.1.5) (Isoleucyl-tRNA synthetase) (IleRS)	isoleucyl-tRNA aminoacylation [GO:0006428]; mitochondrial translation [GO:0032543]; tRNA aminoacylation for protein translation [GO:0006418]	mitochondrial matrix [GO:0005759]; mitochondrion [GO:0005739]	aminoacyl-tRNA editing activity [GO:0002161]; ATP binding [GO:0005524]; isoleucine-tRNA ligase activity [GO:0004822]; tRNA binding [GO:0000049]	IARS2	Homo sapiens (Human)	1012	113792	SUBCELLULAR LOCATION: Mitochondrion matrix {ECO:0000250}.
N : D63G	Q9NUL3	Q9NUL3	14|11|5|8	38	9.5	4	0|0|0|0|0|0|0|0|0|0|0|0|0|0|0|0	1	1	1	1	1	8.25	95	0		TRUE	Q9NUL3	STAU2	1	1	11	68	16.1765	TRUE	Q9NUL3	STAU2_HUMAN	Double-stranded RNA-binding protein Staufen homolog 2	anterograde dendritic transport of messenger ribonucleoprotein complex [GO:0098964]; cellular response to oxidative stress [GO:0034599]; eye morphogenesis [GO:0048592]; germ cell development [GO:0007281]; intracellular mRNA localization [GO:0008298]; positive regulation of dendritic spine morphogenesis [GO:0061003]; positive regulation of long-term synaptic depression [GO:1900454]; positive regul…	axon [GO:0030424]; cytoplasmic stress granule [GO:0010494]; dendrite cytoplasm [GO:0032839]; dendritic shaft [GO:0043198]; endoplasmic reticulum [GO:0005783]; membrane [GO:0016020]; messenger ribonucleoprotein complex [GO:1990124]; microtubule [GO:0005874]; neuron projection [GO:0043005]; neuronal cell body [GO:0043025]; nuclear membrane [GO:0031965]; nucleolus [GO:0005730]; plasma membrane [GO:0…	double-stranded RNA binding [GO:0003725]; Hsp70 protein binding [GO:0030544]; kinesin binding [GO:0019894]; mitogen-activated protein kinase binding [GO:0051019]; mRNA binding [GO:0003729]; ribosome binding [GO:0043022]; RNA binding [GO:0003723]	STAU2	Homo sapiens (Human)	570	62608	SUBCELLULAR LOCATION: Cytoplasm. Nucleus. Nucleus, nucleolus. Endoplasmic reticulum. Note=Shuttles between the nucleolus, nucleus and the cytoplasm. Nuclear export of isoform 1 is independent of XPO1/CRM1 and requires the exportin XPO5. Nuclear export of isoform 2 and isoform 3 can occur by both XPO1/CRM1-dependent and XPO1/CRM1-independent pathways. Found in large cytoplasmic ribonucleoprotein (…
N : D63G	Q9NX05	Q9NX05	12|9|8|8	37	9.25	4	0|0|0|1|0|0|0|0|0|0|0|0|0|0|0|0	1	1	1	1	1	13.07	92.5	0		TRUE	Q9NX05	FAM120C	2	1.11111	9	68	13.2353	TRUE	Q9NX05	F120C_HUMAN	Constitutive coactivator of PPAR-gamma-like protein 2 (Protein FAM120C) (Tumor antigen BJ-HCC-21)		nucleus [GO:0005634]	RNA binding [GO:0003723]	FAM120C	Homo sapiens (Human)	1096	120588
N : D63G	Q9NYU2	Q9NYU2	12|13|11|12	48	12	4	3|3|3|5|1|4|3|1|3|5|4|6|5|2|2|3	0.95	0.99	0.95	0.99	0.95	2.15	3.62	0.01		TRUE	Q9NYU2	UGGT1	6	2.36667	30	68	44.1176	TRUE	Q9NYU2	UGGG1_HUMAN	UDP-glucose:glycoprotein glucosyltransferase 1 (UGT1) (hUGT1) (EC 2.4.1.-) (UDP--Glc:glycoprotein glucosyltransferase) (UDP-glucose ceramide glucosyltransferase-like 1)	'de novo' post-translational protein folding [GO:0051084]; endoplasmic reticulum mannose trimming [GO:1904380]; ER-associated misfolded protein catabolic process [GO:0071712]; protein N-linked glycosylation via asparagine [GO:0018279]	endoplasmic reticulum [GO:0005783]; endoplasmic reticulum lumen [GO:0005788]; endoplasmic reticulum quality control compartment [GO:0044322]; endoplasmic reticulum-Golgi intermediate compartment [GO:0005793]; extracellular exosome [GO:0070062]; protein-containing complex [GO:0032991]	UDP-glucose:glycoprotein glucosyltransferase activity [GO:0003980]; unfolded protein binding [GO:0051082]	UGGT1	Homo sapiens (Human)	1555	177190	SUBCELLULAR LOCATION: Endoplasmic reticulum lumen {ECO:0000255|PROSITE-ProRule:PRU10138, ECO:0000269|PubMed:10694380}. Endoplasmic reticulum-Golgi intermediate compartment {ECO:0000255|PROSITE-ProRule:PRU10138, ECO:0000269|PubMed:10694380}.
N : D63G	Q9NZL9	Q9NZL9	2|2|2|2	8	2	4	0|0|0|0|0|0|0|0|0|0|0|0|0|0|0|0	0.95	0.95	0.95	0.95	0.95	2.98	20	0.01		TRUE								TRUE	Q9NZL9	MAT2B_HUMAN	Methionine adenosyltransferase 2 subunit beta (Methionine adenosyltransferase II beta) (MAT II beta) (Putative dTDP-4-keto-6-deoxy-D-glucose 4-reductase)	one-carbon metabolic process [GO:0006730]; S-adenosylmethionine biosynthetic process [GO:0006556]	cytosol [GO:0005829]; extracellular exosome [GO:0070062]; methionine adenosyltransferase complex [GO:0048269]; nucleus [GO:0005634]	enzyme binding [GO:0019899]; methionine adenosyltransferase regulator activity [GO:0048270]	MAT2B	Homo sapiens (Human)	334	37552
N : D63G	Q9UBQ7	Q9UBQ7	5|8|2|3	18	4.5	4	0|1|0|0|0|0|0|0|0|0|0|0|0|0|0|0	0.99	1	0.99	1	0.99	2.98	45	0		TRUE	Q9UBQ7	GRHPR	1	1	4	68	5.88235	TRUE	Q9UBQ7	GRHPR_HUMAN	Glyoxylate reductase/hydroxypyruvate reductase (EC 1.1.1.79) (EC 1.1.1.81)	carboxylic acid metabolic process [GO:0019752]; dicarboxylic acid metabolic process [GO:0043648]; glyoxylate metabolic process [GO:0046487]	catalytic complex [GO:1902494]; cytoplasm [GO:0005737]; cytosol [GO:0005829]; extracellular exosome [GO:0070062]; peroxisomal matrix [GO:0005782]	carboxylic acid binding [GO:0031406]; glycerate dehydrogenase activity [GO:0008465]; glyoxylate reductase (NADP+) activity [GO:0030267]; hydroxypyruvate reductase activity [GO:0016618]; NAD binding [GO:0051287]; NADPH binding [GO:0070402]; protein homodimerization activity [GO:0042803]	GRHPR	Homo sapiens (Human)	328	35668
N : D63G	Q9UGR2	Q9UGR2	4|2|2|3	11	2.75	4	0|0|0|0|1|0|1|0|0|0|0|0|0|0|0|0	0.96	1	0.96	1	0.96	2.59	22	0.01		TRUE	Q9UGR2	ZC3H7B	3	1.83333	6	68	8.82353	TRUE	Q9UGR2	Z3H7B_HUMAN	Zinc finger CCCH domain-containing protein 7B (Rotavirus 'X'-associated non-structural protein) (RoXaN)	miRNA processing [GO:0035196]; post-transcriptional regulation of gene expression [GO:0010608]	nucleus [GO:0005634]	metal ion binding [GO:0046872]; miRNA binding [GO:0035198]; RNA binding [GO:0003723]	ZC3H7B	Homo sapiens (Human)	977	109858	SUBCELLULAR LOCATION: Nucleus {ECO:0000269|PubMed:18799579}. Note=Nuclear localization seems to be depleted upon rotavirus A infection.
N : D63G	Q9Y2K5	Q9Y2K5	12|20|13|14	59	14.75	4	1|3|1|1|0|1|1|1|1|3|2|2|1|1|1|0	1	1	1	1	1	9.78	11.8	0		TRUE	Q9Y2K5	R3HDM2	3	1.23333	30	68	44.1176	TRUE	Q9Y2K5	R3HD2_HUMAN	R3H domain-containing protein 2		nucleus [GO:0005634]	RNA binding [GO:0003723]	R3HDM2	Homo sapiens (Human)	976	106999	SUBCELLULAR LOCATION: Nucleus {ECO:0000305}.
N : D63G	Q9Y315	Q9Y315	6|2|3|3	14	3.5	4	0|0|0|0|0|0|0|0|0|0|0|0|0|0|0|0	0.98	1	0.98	1	0.98	2.98	35	0		TRUE	Q9Y315	DERA	4	1.54545	11	68	16.1765	TRUE	Q9Y315	DEOC_HUMAN	Deoxyribose-phosphate aldolase (DERA) (EC 4.1.2.4) (2-deoxy-D-ribose 5-phosphate aldolase) (Phosphodeoxyriboaldolase) (Deoxyriboaldolase)	carbohydrate catabolic process [GO:0016052]; deoxyribonucleoside catabolic process [GO:0046121]; deoxyribonucleotide catabolic process [GO:0009264]; deoxyribose phosphate catabolic process [GO:0046386]; pentose-phosphate shunt [GO:0006098]	cytosol [GO:0005829]; extracellular region [GO:0005576]; ficolin-1-rich granule lumen [GO:1904813]; nucleoplasm [GO:0005654]; secretory granule lumen [GO:0034774]	deoxyribose-phosphate aldolase activity [GO:0004139]	DERA	Homo sapiens (Human)	318	35231	SUBCELLULAR LOCATION: Cytoplasm {ECO:0000269|PubMed:25229427}. Cytoplasmic granule {ECO:0000269|PubMed:25229427}. Nucleus {ECO:0000269|PubMed:25229427}. Note=Recruited to stress granules but not to processing bodies upon arsenite or clotrimazole treatment or energy deprivation. {ECO:0000269|PubMed:25229427}.
N : D63G	Q9Y496	Q9Y496	7|5|4|4	20	5	4	0|0|0|0|0|0|0|0|0|0|0|0|0|0|0|0	1	1	1	1	1	6.57	50	0		TRUE	Q9Y496	KIF3A	1	1	7	68	10.2941	TRUE	Q9Y496	KIF3A_HUMAN	Kinesin-like protein KIF3A (Microtubule plus end-directed kinesin motor 3A)	anterograde axonal transport [GO:0008089]; centriole-centriole cohesion [GO:0010457]; cilium assembly [GO:0060271]; microtubule anchoring at centrosome [GO:0034454]; microtubule-based movement [GO:0007018]; organelle organization [GO:0006996]; plus-end-directed vesicle transport along microtubule [GO:0072383]; protein localization to cell junction [GO:1902414]; protein transport [GO:0015031]	axon cytoplasm [GO:1904115]; centriole [GO:0005814]; centrosome [GO:0005813]; ciliary tip [GO:0097542]; cilium [GO:0005929]; cytosol [GO:0005829]; extracellular exosome [GO:0070062]; kinesin complex [GO:0005871]; kinesin II complex [GO:0016939]; microtubule [GO:0005874]; microtubule cytoskeleton [GO:0015630]	ATP binding [GO:0005524]; ATP hydrolysis activity [GO:0016887]; microtubule binding [GO:0008017]; microtubule motor activity [GO:0003777]; plus-end-directed microtubule motor activity [GO:0008574]; protein phosphatase binding [GO:0019903]; small GTPase binding [GO:0031267]; spectrin binding [GO:0030507]	KIF3A	Homo sapiens (Human)	699	80041	SUBCELLULAR LOCATION: Cytoplasm, cytoskeleton {ECO:0000305}. Cell projection, cilium {ECO:0000250|UniProtKB:P28741}. Cytoplasm, cytoskeleton, microtubule organizing center, centrosome, centriole {ECO:0000269|PubMed:23386061}. Note=Localizes to the subdistal appendage region of the centriole. {ECO:0000269|PubMed:23386061}.
N : D63G	Q9Y606	Q9Y606	15|17|8|9	49	12.25	4	0|0|0|1|2|1|2|1|0|1|2|0|0|0|0|0	1	1	1	1	1	10.91	19.6	0		TRUE	Q9Y606	PUS1	5	1.71429	21	68	30.8824	TRUE	Q9Y606	PUS1_HUMAN	Pseudouridylate synthase 1 homolog (EC 5.4.99.-) (tRNA pseudouridine synthase 1) (EC 5.4.99.12) (tRNA pseudouridine(38-40) synthase) (tRNA pseudouridylate synthase I) (tRNA-uridine isomerase I)	mitochondrial tRNA pseudouridine synthesis [GO:0070902]; mRNA processing [GO:0006397]; mRNA pseudouridine synthesis [GO:1990481]; RNA splicing [GO:0008380]; tRNA pseudouridine synthesis [GO:0031119]	cytoplasm [GO:0005737]; mitochondrial matrix [GO:0005759]; mitochondrion [GO:0005739]; nucleoplasm [GO:0005654]; nucleus [GO:0005634]	pseudouridine synthase activity [GO:0009982]; RNA binding [GO:0003723]; steroid receptor RNA activator RNA binding [GO:0002153]; tRNA binding [GO:0000049]; tRNA pseudouridine synthase activity [GO:0106029]	PUS1	Homo sapiens (Human)	427	47470	SUBCELLULAR LOCATION: [Isoform 1]: Mitochondrion {ECO:0000269|PubMed:17056637, ECO:0000305|PubMed:15772074}.; SUBCELLULAR LOCATION: [Isoform 2]: Nucleus {ECO:0000269|PubMed:17056637, ECO:0000305|PubMed:15772074}. Cytoplasm {ECO:0000305|PubMed:15772074}.
N : D63G	Q9Y6E0	Q9Y6E0	2|3|2|3	10	2.5	4	0|0|0|0|0|0|0|0|0|1|2|2|0|0|0|0	0.78	0.88	0.78	0.88	0.78	0.8	8	0.04		TRUE	Q9Y6E0	STK24	3	1.5	10	68	14.7059	TRUE	Q9Y6E0	STK24_HUMAN	Serine/threonine-protein kinase 24 (EC 2.7.11.1) (Mammalian STE20-like protein kinase 3) (MST-3) (STE20-like kinase MST3) [Cleaved into: Serine/threonine-protein kinase 24 36 kDa subunit (Mammalian STE20-like protein kinase 3 N-terminal) (MST3/N); Serine/threonine-protein kinase 24 12 kDa subunit (Mammalian STE20-like protein kinase 3 C-terminal) (MST3/C)]	cellular response to starvation [GO:0009267]; execution phase of apoptosis [GO:0097194]; intrinsic apoptotic signaling pathway in response to oxidative stress [GO:0008631]; negative regulation of cell migration [GO:0030336]; positive regulation of axon regeneration [GO:0048680]; protein autophosphorylation [GO:0046777]; protein phosphorylation [GO:0006468]; regulation of axon regeneration [GO:004…	cytoplasm [GO:0005737]; cytosol [GO:0005829]; extracellular exosome [GO:0070062]; Golgi apparatus [GO:0005794]; Golgi membrane [GO:0000139]; nucleolus [GO:0005730]; nucleoplasm [GO:0005654]; nucleus [GO:0005634]	ATP binding [GO:0005524]; cadherin binding [GO:0045296]; metal ion binding [GO:0046872]; protein kinase activity [GO:0004672]; protein serine kinase activity [GO:0106310]; protein serine/threonine kinase activity [GO:0004674]	STK24	Homo sapiens (Human)	443	49308	SUBCELLULAR LOCATION: Cytoplasm. Nucleus. Membrane. Note=The truncated form (MST3/N) translocates to the nucleus. Colocalizes with STK38L in the membrane.
N : P80R	O00186	O00186	3|3|9|5	20	5	4	0|0|0|0|0|1|0|0|0|0|0|0|1|2|2|1	0.91	1	0.91	1	0.91	1.58	11.43	0.01		TRUE	O00186	STXBP3	3	1.53571	28	68	41.1765	TRUE	O00186	STXB3_HUMAN	Syntaxin-binding protein 3 (Platelet Sec1 protein) (PSP) (Protein unc-18 homolog 3) (Unc18-3) (Protein unc-18 homolog C) (Unc-18C)	brain development [GO:0007420]; cellular glucose homeostasis [GO:0001678]; cellular response to type II interferon [GO:0071346]; insulin secretion [GO:0030073]; intracellular protein transport [GO:0006886]; negative regulation of calcium ion-dependent exocytosis [GO:0045955]; negative regulation of glucose import [GO:0046325]; neurotransmitter secretion [GO:0007269]; neutrophil degranulation [GO:…	apical plasma membrane [GO:0016324]; basolateral plasma membrane [GO:0016323]; cytosol [GO:0005829]; extracellular exosome [GO:0070062]; phagocytic vesicle [GO:0045335]; plasma membrane [GO:0005886]; platelet alpha granule [GO:0031091]; presynapse [GO:0098793]; secretory granule [GO:0030141]; specific granule [GO:0042581]; tertiary granule [GO:0070820]	protein-containing complex binding [GO:0044877]; syntaxin binding [GO:0019905]; syntaxin-1 binding [GO:0017075]	STXBP3	Homo sapiens (Human)	592	67764	SUBCELLULAR LOCATION: Cytoplasm, cytosol {ECO:0000269|PubMed:10194441}. Cell membrane {ECO:0000269|PubMed:10194441}. Note=In platelets, predominantly cytosolic. Low amounts membrane-associated.
N : P80R	O00411	O00411	5|10|6|7	28	7	4	0|0|0|0|0|0|0|0|0|0|0|0|0|0|0|0	1	1	1	1	1	8.25	70	0		TRUE	O00411	POLRMT	23	8.16667	6	68	8.82353	TRUE	O00411	RPOM_HUMAN	DNA-directed RNA polymerase, mitochondrial (MtRPOL) (EC 2.7.7.6)	mitochondrial transcription [GO:0006390]; transcription initiation at mitochondrial promoter [GO:0006391]	mitochondrial DNA-directed RNA polymerase complex [GO:0034245]; mitochondrial matrix [GO:0005759]; mitochondrial nucleoid [GO:0042645]; mitochondrion [GO:0005739]; protein-containing complex [GO:0032991]	3'-5'-exoribonuclease activity [GO:0000175]; DNA primase activity [GO:0003896]; DNA-directed 5'-3' RNA polymerase activity [GO:0003899]; mitochondrial promoter sequence-specific DNA binding [GO:0001018]; RNA binding [GO:0003723]; sequence-specific DNA binding [GO:0043565]	POLRMT	Homo sapiens (Human)	1230	138620	SUBCELLULAR LOCATION: Mitochondrion {ECO:0000269|PubMed:23283301, ECO:0000269|PubMed:29445193}.
N : P80R	O00461	O00461	2|3|2|2	9	2.25	4	1|0|0|0|0|0|0|0|0|0|0|1|0|0|0|0	0.94	0.99	0.94	0.99	0.94	2.59	18	0.01		TRUE	O00461	GOLIM4	2	1.25	8	68	11.7647	TRUE	O00461	GOLI4_HUMAN	Golgi integral membrane protein 4 (Golgi integral membrane protein, cis) (GIMPc) (Golgi phosphoprotein 4) (Golgi-localized phosphoprotein of 130 kDa) (Golgi phosphoprotein of 130 kDa)		cis-Golgi network [GO:0005801]; endocytic vesicle [GO:0030139]; endosome membrane [GO:0010008]; Golgi apparatus [GO:0005794]; Golgi cisterna membrane [GO:0032580]; Golgi lumen [GO:0005796]; Golgi membrane [GO:0000139]; membrane [GO:0016020]; transport vesicle [GO:0030133]		GOLIM4	Homo sapiens (Human)	696	81880	SUBCELLULAR LOCATION: Golgi apparatus, Golgi stack membrane; Single-pass type II membrane protein. Endosome membrane; Single-pass type II membrane protein. Membrane {ECO:0000305}; Lipid-anchor {ECO:0000305}. Note=Localizes to cis and medial Golgi cisternae. Probably cycles between early Golgi and distal compartments like endosome.
N : P80R	O00468	O00468	6|3|6|2	17	4.25	4	0|0|0|0|0|0|0|0|0|0|0|0|0|0|0|0	0.99	1	0.99	1	0.99	2.98	42.5	0		TRUE	O00468	AGRN	2	1.2	5	68	7.35294	TRUE	O00468	AGRIN_HUMAN	Agrin [Cleaved into: Agrin N-terminal 110 kDa subunit; Agrin C-terminal 110 kDa subunit; Agrin C-terminal 90 kDa fragment (C90); Agrin C-terminal 22 kDa fragment (C22)]	animal organ morphogenesis [GO:0009887]; clustering of voltage-gated sodium channels [GO:0045162]; G protein-coupled acetylcholine receptor signaling pathway [GO:0007213]; neuromuscular junction development [GO:0007528]; positive regulation of filopodium assembly [GO:0051491]; positive regulation of GTPase activity [GO:0043547]; positive regulation of synaptic assembly at neuromuscular junction […	basement membrane [GO:0005604]; collagen-containing extracellular matrix [GO:0062023]; extracellular exosome [GO:0070062]; extracellular region [GO:0005576]; Golgi lumen [GO:0005796]; lysosomal lumen [GO:0043202]; plasma membrane [GO:0005886]; synapse [GO:0045202]	calcium ion binding [GO:0005509]; chondroitin sulfate binding [GO:0035374]; dystroglycan binding [GO:0002162]; heparan sulfate proteoglycan binding [GO:0043395]; laminin binding [GO:0043236]; sialic acid binding [GO:0033691]; structural constituent of cytoskeleton [GO:0005200]	AGRN	Homo sapiens (Human)	2068	217320	SUBCELLULAR LOCATION: [Isoform 1]: Secreted, extracellular space, extracellular matrix {ECO:0000269|PubMed:20551380}. Note=Synaptic basal lamina at the neuromuscular junction. {ECO:0000250|UniProtKB:P31696}.; SUBCELLULAR LOCATION: [Isoform 2]: Synapse {ECO:0000250|UniProtKB:A2ASQ1}. Cell membrane {ECO:0000250|UniProtKB:A2ASQ1}; Single-pass type II membrane protein {ECO:0000250|UniProtKB:A2ASQ1}.
N : P80R	O00469	O00469	5|3|6|3	17	4.25	4	0|0|0|1|0|0|0|0|0|0|0|1|0|0|0|0	0.99	1	0.99	1	0.99	4.4	34	0		TRUE	O00469	PLOD2	4	1.4	10	68	14.7059	TRUE	O00469	PLOD2_HUMAN	Procollagen-lysine,2-oxoglutarate 5-dioxygenase 2 (EC 1.14.11.4) (Lysyl hydroxylase 2) (LH2)	hydroxylysine biosynthetic process [GO:0046947]; peptidyl-lysine hydroxylation [GO:0017185]; protein modification process [GO:0036211]; response to hypoxia [GO:0001666]	endoplasmic reticulum [GO:0005783]; endoplasmic reticulum membrane [GO:0005789]; extracellular exosome [GO:0070062]; rough endoplasmic reticulum membrane [GO:0030867]	iron ion binding [GO:0005506]; L-ascorbic acid binding [GO:0031418]; procollagen-lysine 5-dioxygenase activity [GO:0008475]	PLOD2	Homo sapiens (Human)	737	84686	SUBCELLULAR LOCATION: Rough endoplasmic reticulum membrane; Peripheral membrane protein; Lumenal side.
N : P80R	O43592	O43592	19|18|15|21	73	18.25	4	0|0|0|0|0|1|0|0|0|0|0|0|0|3|2|3	1	1	1	1	1	8.46	32.44	0		TRUE	O43592	XPOT	43	4.83333	24	68	35.2941	TRUE	O43592	XPOT_HUMAN	Exportin-T (Exportin(tRNA)) (tRNA exportin)	intracellular protein transport [GO:0006886]; tRNA export from nucleus [GO:0006409]; tRNA re-export from nucleus [GO:0071528]	cytoplasm [GO:0005737]; cytosol [GO:0005829]; nuclear matrix [GO:0016363]; nuclear pore [GO:0005643]; nucleoplasm [GO:0005654]	small GTPase binding [GO:0031267]; tRNA binding [GO:0000049]	XPOT	Homo sapiens (Human)	962	109964	SUBCELLULAR LOCATION: Nucleus. Cytoplasm. Note=Nuclear, once bound to tRNA and Ran the complex translocates to the cytoplasm. Shuttles between the nucleus and the cytoplasm.
N : P80R	O43678	O43678	3|3|2|3	11	2.75	4	0|0|0|0|0|0|0|0|0|0|0|0|0|0|0|0	0.98	0.99	0.98	0.99	0.98	2.98	27.5	0		TRUE	O43678	NDUFA2	4	1.77778	9	68	13.2353	TRUE	O43678	NDUA2_HUMAN	NADH dehydrogenase [ubiquinone] 1 alpha subcomplex subunit 2 (Complex I-B8) (CI-B8) (NADH-ubiquinone oxidoreductase B8 subunit)	aerobic respiration [GO:0009060]; blastocyst hatching [GO:0001835]; mitochondrial electron transport, NADH to ubiquinone [GO:0006120]; mitochondrial respiratory chain complex I assembly [GO:0032981]; proton motive force-driven mitochondrial ATP synthesis [GO:0042776]	mitochondrial inner membrane [GO:0005743]; mitochondrial membrane [GO:0031966]; mitochondrial respiratory chain complex I [GO:0005747]	NADH dehydrogenase (ubiquinone) activity [GO:0008137]	NDUFA2	Homo sapiens (Human)	99	10922	SUBCELLULAR LOCATION: Mitochondrion inner membrane {ECO:0000305|PubMed:12611891}; Peripheral membrane protein {ECO:0000305}; Matrix side {ECO:0000305}.
N : P80R	O75027	O75027	11|8|11|5	35	8.75	4	1|1|0|0|1|2|0|0|0|0|1|0|0|0|0|0	1	1	1	1	1	7.16	23.33	0		TRUE	O75027	ABCB7	4	1.68182	22	68	32.3529	TRUE	O75027	ABCB7_HUMAN	Iron-sulfur clusters transporter ABCB7, mitochondrial (ATP-binding cassette sub-family B member 7, mitochondrial) (ATP-binding cassette transporter 7) (ABC transporter 7 protein)	cellular iron ion homeostasis [GO:0006879]; iron ion homeostasis [GO:0055072]; iron ion transmembrane transport [GO:0034755]; iron-sulfur cluster assembly [GO:0016226]; iron-sulfur cluster export from the mitochondrion [GO:0140466]; negative regulation of reactive oxygen species biosynthetic process [GO:1903427]; positive regulation of heme biosynthetic process [GO:0070455]; positive regulation o…	membrane [GO:0016020]; mitochondrial inner membrane [GO:0005743]; mitochondrion [GO:0005739]	ABC-type iron-sulfur cluster transporter activity [GO:0140481]; ATP binding [GO:0005524]; ATPase-coupled transmembrane transporter activity [GO:0042626]; heme transmembrane transporter activity [GO:0015232]; protein homodimerization activity [GO:0042803]	ABCB7	Homo sapiens (Human)	752	82641	SUBCELLULAR LOCATION: Mitochondrion inner membrane {ECO:0000250|UniProtKB:P40416}; Multi-pass membrane protein {ECO:0000250|UniProtKB:P40416}.
N : P80R	O75436	O75436	7|5|8|8	28	7	4	2|2|4|2|0|2|0|1|3|2|3|4|0|0|0|0	0.84	0.96	0.84	0.96	0.84	0.18	4.48	0.03		TRUE	O75436	VPS26A	4	1.76471	17	68	25	TRUE	O75436	VP26A_HUMAN	Vacuolar protein sorting-associated protein 26A (Vesicle protein sorting 26A) (hVPS26)	endocytic recycling [GO:0032456]; intracellular protein transport [GO:0006886]; regulation of macroautophagy [GO:0016241]; retrograde transport, endosome to Golgi [GO:0042147]	cytosol [GO:0005829]; early endosome [GO:0005769]; endosome [GO:0005768]; endosome membrane [GO:0010008]; lysosome [GO:0005764]; retromer complex [GO:0030904]; retromer, cargo-selective complex [GO:0030906]; tubular endosome [GO:0097422]; vesicle [GO:0031982]		VPS26A	Homo sapiens (Human)	327	38170	SUBCELLULAR LOCATION: Cytoplasm {ECO:0000269|PubMed:15078903}. Endosome membrane {ECO:0000269|PubMed:22431521}; Peripheral membrane protein {ECO:0000250|UniProtKB:P40336}. Early endosome {ECO:0000269|PubMed:15078903, ECO:0000269|PubMed:16190980, ECO:0000269|PubMed:16732284, ECO:0000269|PubMed:20682791}. Note=Localizes to tubular profiles adjacent to endosomes (PubMed:15078903). Predominantly foun…
N : P80R	O95470	O95470	9|14|15|14	52	13	4	2|2|2|3|0|3|4|2|4|2|0|2|0|0|0|0	1	1	1	1	1	4.26	8	0		TRUE	O95470	SGPL1	7	2.83333	30	68	44.1176	TRUE	O95470	SGPL1_HUMAN	Sphingosine-1-phosphate lyase 1 (S1PL) (SP-lyase 1) (SPL 1) (hSPL) (EC 4.1.2.27) (Sphingosine-1-phosphate aldolase)	androgen metabolic process [GO:0008209]; apoptotic signaling pathway [GO:0097190]; ceramide metabolic process [GO:0006672]; estrogen metabolic process [GO:0008210]; face morphogenesis [GO:0060325]; fatty acid metabolic process [GO:0006631]; fibroblast migration [GO:0010761]; hemopoiesis [GO:0030097]; kidney development [GO:0001822]; Leydig cell differentiation [GO:0033327]; luteinization [GO:0001…	endoplasmic reticulum [GO:0005783]; endoplasmic reticulum membrane [GO:0005789]	pyridoxal phosphate binding [GO:0030170]; sphinganine-1-phosphate aldolase activity [GO:0008117]	SGPL1	Homo sapiens (Human)	568	63524	SUBCELLULAR LOCATION: Endoplasmic reticulum membrane {ECO:0000269|PubMed:14570870}; Single-pass type III membrane protein {ECO:0000255}; Cytoplasmic side {ECO:0000250|UniProtKB:Q8R0X7}.
N : P80R	P0DTC9	P0DTC9	90|98|120|104	412	103	4	0|0|0|0|0|0|0|0|0|0|0|0|0|0|0|0	1	1	1	1	1	131.56	1030	0		TRUE								TRUE	P0DTC9	NCAP_SARS2	Nucleoprotein (N) (Nucleocapsid protein) (NC) (Protein N)	negative regulation of interferon-beta production [GO:0032688]; positive regulation of NLRP3 inflammasome complex assembly [GO:1900227]; response to host immune response [GO:0052572]; viral RNA genome packaging [GO:0019074]	host cell endoplasmic reticulum-Golgi intermediate compartment [GO:0044172]; host cell Golgi apparatus [GO:0044177]; host cell perinuclear region of cytoplasm [GO:0044220]; intracellular non-membrane-bounded organelle [GO:0043232]; MHC class I protein complex [GO:0042612]; ribonucleoprotein complex [GO:1990904]; viral capsid [GO:0019028]; viral nucleocapsid [GO:0019013]	identical protein binding [GO:0042802]; MHC class I protein binding [GO:0042288]; molecular condensate scaffold activity [GO:0140693]; protein homodimerization activity [GO:0042803]; RNA binding [GO:0003723]; RNA stem-loop binding [GO:0035613]	N	Severe acute respiratory syndrome coronavirus 2 (2019-nCoV) (SARS-CoV-2)	419	45626	SUBCELLULAR LOCATION: Virion {ECO:0000255|HAMAP-Rule:MF_04096}. Host cytoplasm {ECO:0000269|PubMed:33060197, ECO:0000269|PubMed:34341353}. Secreted {ECO:0000269|PubMed:35921414}. Host extracellular space {ECO:0000269|PubMed:35921414}. Note=Probably associates with ER-derived membranes where it participates in viral RNA synthesis and virus budding. When located inside the virion, complexed with th…
N : P80R	P10321	P10321	2|3|2|2	9	2.25	4	0|0|0|0|0|0|1|0|0|0|0|0|0|0|0|0	0.96	0.99	0.96	0.99	0.96	2.98	22.5	0.01		TRUE	P10321	HLA-C	2	1.5	2	68	2.94118	TRUE	P10321	HLAC_HUMAN	HLA class I histocompatibility antigen, C alpha chain (HLA-C) (HLA-Cw) (Human leukocyte antigen C)	adaptive immune response [GO:0002250]; antigen processing and presentation of endogenous peptide antigen via MHC class I via ER pathway, TAP-independent [GO:0002486]; immune response [GO:0006955]; innate immune response [GO:0045087]	cell surface [GO:0009986]; early endosome membrane [GO:0031901]; endoplasmic reticulum [GO:0005783]; endoplasmic reticulum membrane [GO:0005789]; ER to Golgi transport vesicle membrane [GO:0012507]; extracellular exosome [GO:0070062]; Golgi apparatus [GO:0005794]; Golgi membrane [GO:0000139]; membrane [GO:0016020]; MHC class I protein complex [GO:0042612]; phagocytic vesicle membrane [GO:0030670]…	peptide antigen binding [GO:0042605]; TAP binding [GO:0046977]	HLA-C	Homo sapiens (Human)	366	40649	SUBCELLULAR LOCATION: Cell membrane {ECO:0000269|PubMed:18420581, ECO:0000269|PubMed:20972337, ECO:0000269|PubMed:28649982}; Single-pass type I membrane protein {ECO:0000255}. Endoplasmic reticulum membrane {ECO:0000305|PubMed:18420581}; Single-pass membrane protein {ECO:0000255}.
N : P80R	P24666	P24666	2|5|3|5	15	3.75	4	0|0|0|0|0|0|0|0|0|0|0|0|0|0|0|0	0.99	1	0.99	1	0.99	2.98	37.5	0		TRUE	P24666	ACP1	3	1.75	4	68	5.88235	TRUE	P24666	PPAC_HUMAN	Low molecular weight phosphotyrosine protein phosphatase (LMW-PTP) (LMW-PTPase) (EC 3.1.3.48) (Adipocyte acid phosphatase) (Low molecular weight cytosolic acid phosphatase) (EC 3.1.3.2) (Red cell acid phosphatase 1)	protein dephosphorylation [GO:0006470]	cytoplasm [GO:0005737]; cytoplasmic side of plasma membrane [GO:0009898]; cytosol [GO:0005829]; extracellular exosome [GO:0070062]; sarcolemma [GO:0042383]	acid phosphatase activity [GO:0003993]; non-membrane spanning protein tyrosine phosphatase activity [GO:0004726]; protein tyrosine phosphatase activity [GO:0004725]	ACP1	Homo sapiens (Human)	158	18042	SUBCELLULAR LOCATION: Cytoplasm.
N : P80R	P55786	P55786	10|20|11|12	53	13.25	4	1|0|0|1|0|3|0|0|3|0|0|1|0|0|0|2	1	1	1	1	1	6.38	19.27	0		TRUE	P55786	NPEPPS	6	1.92857	28	68	41.1765	TRUE	P55786	PSA_HUMAN	Puromycin-sensitive aminopeptidase (PSA) (EC 3.4.11.14) (Cytosol alanyl aminopeptidase) (AAP-S)	cellular response to hypoxia [GO:0071456]; peptide catabolic process [GO:0043171]; positive regulation of protein targeting to mitochondrion [GO:1903955]; protein polyubiquitination [GO:0000209]; proteolysis [GO:0006508]	cytoplasm [GO:0005737]; cytosol [GO:0005829]; extracellular exosome [GO:0070062]; nucleus [GO:0005634]	aminopeptidase activity [GO:0004177]; metalloaminopeptidase activity [GO:0070006]; peptide binding [GO:0042277]; zinc ion binding [GO:0008270]	NPEPPS	Homo sapiens (Human)	919	103276	SUBCELLULAR LOCATION: Cytoplasm, cytosol {ECO:0000269|PubMed:10978616}. Nucleus {ECO:0000305}.
N : P80R	Q05707	Q05707	4|3|4|5	16	4	4	0|1|0|1|1|0|1|0|0|0|1|2|0|0|0|0	0.93	0.99	0.93	0.99	0.93	1.54	9.14	0.01		TRUE	Q05707	COL14A1	3	1.22222	9	68	13.2353	TRUE	Q05707	COEA1_HUMAN	Collagen alpha-1(XIV) chain (Undulin)	cell-cell adhesion [GO:0098609]; collagen fibril organization [GO:0030199]; extracellular matrix organization [GO:0030198]	collagen trimer [GO:0005581]; collagen type XIV trimer [GO:0005596]; collagen-containing extracellular matrix [GO:0062023]; endoplasmic reticulum lumen [GO:0005788]; extracellular matrix [GO:0031012]; extracellular region [GO:0005576]; extracellular space [GO:0005615]; interstitial matrix [GO:0005614]	collagen binding [GO:0005518]; extracellular matrix structural constituent [GO:0005201]; extracellular matrix structural constituent conferring tensile strength [GO:0030020]; protein-macromolecule adaptor activity [GO:0030674]; RNA binding [GO:0003723]	COL14A1	Homo sapiens (Human)	1796	193515	SUBCELLULAR LOCATION: Secreted, extracellular space, extracellular matrix {ECO:0000250|UniProtKB:P32018}.
N : P80R	Q08380	Q08380	9|13|4|7	33	8.25	4	0|0|0|0|0|1|0|0|0|0|0|0|0|1|1|2	1	1	1	1	1	4.28	26.4	0		TRUE	Q08380	LGALS3BP	3	1.6087	23	68	33.8235	TRUE	Q08380	LG3BP_HUMAN	Galectin-3-binding protein (Basement membrane autoantigen p105) (Lectin galactoside-binding soluble 3-binding protein) (Mac-2-binding protein) (MAC2BP) (Mac-2 BP) (Tumor-associated antigen 90K)	cell adhesion [GO:0007155]; cellular defense response [GO:0006968]; signal transduction [GO:0007165]	blood microparticle [GO:0072562]; collagen-containing extracellular matrix [GO:0062023]; extracellular exosome [GO:0070062]; extracellular region [GO:0005576]; extracellular space [GO:0005615]; membrane [GO:0016020]; platelet dense granule lumen [GO:0031089]	scavenger receptor activity [GO:0005044]	LGALS3BP	Homo sapiens (Human)	585	65331	SUBCELLULAR LOCATION: Secreted {ECO:0000269|PubMed:8390986}. Secreted, extracellular space, extracellular matrix {ECO:0000269|PubMed:9501082}.
N : P80R	Q12849	Q12849	18|10|13|8	49	12.25	4	0|0|0|0|0|0|1|0|0|0|0|0|0|1|0|0	1	1	1	1	1	12.58	98	0		TRUE	Q12849	GRSF1	5	2	33	68	48.5294	TRUE	Q12849	GRSF1_HUMAN	G-rich sequence factor 1 (GRSF-1)	anterior/posterior pattern specification [GO:0009952]; morphogenesis of embryonic epithelium [GO:0016331]; mRNA polyadenylation [GO:0006378]; positive regulation of mitochondrial RNA catabolic process [GO:0000962]; regulation of RNA splicing [GO:0043484]; tRNA processing [GO:0008033]	cytoplasm [GO:0005737]; mitochondrial nucleoid [GO:0042645]; mitochondrion [GO:0005739]; nucleoplasm [GO:0005654]; ribonucleoprotein complex [GO:1990904]; ribonucleoprotein granule [GO:0035770]	mRNA binding [GO:0003729]; RNA binding [GO:0003723]	GRSF1	Homo sapiens (Human)	480	53126	SUBCELLULAR LOCATION: [Isoform 1]: Mitochondrion matrix {ECO:0000269|PubMed:23473033, ECO:0000269|PubMed:23473034, ECO:0000269|PubMed:25683715, ECO:0000269|PubMed:29967381}. Note=Localizes to mitochondrial RNA granules found in close proximity to the mitochondrial nucleoids. {ECO:0000269|PubMed:23473033, ECO:0000269|PubMed:23473034, ECO:0000269|PubMed:25683715}.; SUBCELLULAR LOCATION: [Isoform 2]…
N : P80R	Q14558	Q14558	5|3|5|3	16	4	4	0|0|0|1|0|0|0|0|0|0|0|0|0|0|0|0	1	1	1	1	1	4.83	40	0		TRUE	Q14558	PRPSAP1	5	4.33333	3	68	4.41176	TRUE	Q14558	KPRA_HUMAN	Phosphoribosyl pyrophosphate synthase-associated protein 1 (PRPP synthase-associated protein 1) (39 kDa phosphoribosypyrophosphate synthase-associated protein) (PAP39)	5-phosphoribose 1-diphosphate biosynthetic process [GO:0006015]; nucleobase-containing compound metabolic process [GO:0006139]; purine nucleotide biosynthetic process [GO:0006164]	cytoplasm [GO:0005737]; ribose phosphate diphosphokinase complex [GO:0002189]	enzyme inhibitor activity [GO:0004857]; identical protein binding [GO:0042802]; magnesium ion binding [GO:0000287]; ribose phosphate diphosphokinase activity [GO:0004749]	PRPSAP1	Homo sapiens (Human)	356	39394
N : P80R	Q14573	Q14573	19|24|8|18	69	17.25	4	0|0|0|0|0|0|0|0|0|0|0|0|0|0|1|1	1	1	1	1	1	12.58	138	0		TRUE	Q14573	ITPR3	22	2.875	24	68	35.2941	TRUE	Q14573	ITPR3_HUMAN	Inositol 1,4,5-trisphosphate receptor type 3 (IP3 receptor isoform 3) (IP3R 3) (InsP3R3) (Type 3 inositol 1,4,5-trisphosphate receptor) (Type 3 InsP3 receptor)	G protein-coupled receptor signaling pathway [GO:0007186]; long-term synaptic potentiation [GO:0060291]; memory [GO:0007613]; positive regulation of cytosolic calcium ion concentration [GO:0007204]; response to calcium ion [GO:0051592]; sensory perception of bitter taste [GO:0050913]; sensory perception of sweet taste [GO:0050916]; sensory perception of taste [GO:0050909]; sensory perception of u…	apical part of cell [GO:0045177]; brush border [GO:0005903]; cytoplasm [GO:0005737]; cytoplasmic vesicle membrane [GO:0030659]; endoplasmic reticulum [GO:0005783]; endoplasmic reticulum membrane [GO:0005789]; membrane [GO:0016020]; myelin sheath [GO:0043209]; neuronal cell body [GO:0043025]; nuclear outer membrane [GO:0005640]; nucleolus [GO:0005730]; nucleoplasm [GO:0005654]; plasma membrane [GO…	calcium ion binding [GO:0005509]; calcium-release channel activity [GO:0015278]; inositol 1,3,4,5 tetrakisphosphate binding [GO:0043533]; inositol 1,4,5 trisphosphate binding [GO:0070679]; inositol 1,4,5-trisphosphate-sensitive calcium-release channel activity [GO:0005220]; inositol hexakisphosphate binding [GO:0000822]; phosphatidylinositol binding [GO:0035091]	ITPR3	Homo sapiens (Human)	2671	304106	SUBCELLULAR LOCATION: Endoplasmic reticulum membrane; Multi-pass membrane protein.
N : P80R	Q5T6V5	Q5T6V5	3|2|3|2	10	2.5	4	0|0|0|0|0|0|0|0|0|0|0|0|0|0|0|0	0.97	0.99	0.97	0.99	0.97	2.98	25	0.01		TRUE								TRUE	Q5T6V5	QSPP_HUMAN	Queuosine salvage protein	tRNA modification [GO:0006400]; tRNA-guanine transglycosylation [GO:0101030]			C9orf64	Homo sapiens (Human)	341	39029
N : P80R	Q5T9A4	Q5T9A4	8|9|14|11	42	10.5	4	1|0|2|0|0|0|0|0|1|2|0|2|0|0|0|0	1	1	1	1	1	7.45	21	0		TRUE	Q5T9A4	ATAD3B	5	1.875	16	68	23.5294	TRUE	Q5T9A4	ATD3B_HUMAN	ATPase family AAA domain-containing protein 3B (AAA-TOB3)	mitochondrion organization [GO:0007005]	ficolin-1-rich granule membrane [GO:0101003]; mitochondrial inner membrane [GO:0005743]; mitochondrion [GO:0005739]; plasma membrane [GO:0005886]; secretory granule membrane [GO:0030667]	ATP binding [GO:0005524]; ATP hydrolysis activity [GO:0016887]	ATAD3B	Homo sapiens (Human)	648	72573	SUBCELLULAR LOCATION: Mitochondrion inner membrane {ECO:0000269|PubMed:16909202, ECO:0000269|PubMed:18063578}; Peripheral membrane protein {ECO:0000269|PubMed:16909202, ECO:0000269|PubMed:18063578}. Note=Has been found to co-purify with nucleoids (PubMed:22453275). Since it does not face the mitochondrial matrix, the association with nucleoids could be mediated by ATAD3A. {ECO:0000269|PubMed:2245…
N : P80R	Q6PI48	Q6PI48	10|11|7|10	38	9.5	4	0|0|0|1|1|1|1|2|1|1|0|0|1|0|0|0	1	1	1	1	1	6.6	16.89	0		TRUE	Q6PI48	DARS2	6	2.14286	28	68	41.1765	TRUE	Q6PI48	SYDM_HUMAN	Aspartate--tRNA ligase, mitochondrial (EC 6.1.1.12) (Aspartyl-tRNA synthetase) (AspRS)	aspartyl-tRNA aminoacylation [GO:0006422]; mitochondrial asparaginyl-tRNA aminoacylation [GO:0070145]; tRNA aminoacylation [GO:0043039]	mitochondrial matrix [GO:0005759]; mitochondrion [GO:0005739]; nucleoplasm [GO:0005654]	aspartate-tRNA ligase activity [GO:0004815]; aspartate-tRNA(Asn) ligase activity [GO:0050560]; ATP binding [GO:0005524]; protein homodimerization activity [GO:0042803]; tRNA binding [GO:0000049]	DARS2	Homo sapiens (Human)	645	73563	SUBCELLULAR LOCATION: Mitochondrion matrix {ECO:0000269|PubMed:15779907}.
N : P80R	Q6RW13	Q6RW13	2|3|4|2	11	2.75	4	0|0|0|0|0|0|0|0|0|0|0|0|0|0|0|0	0.97	1	0.97	1	0.97	2.98	27.5	0		TRUE	Q6RW13	AGTRAP	1	1	2	68	2.94118	TRUE	Q6RW13	ATRAP_HUMAN	Type-1 angiotensin II receptor-associated protein (AT1 receptor-associated protein)	regulation of blood pressure [GO:0008217]; response to hypoxia [GO:0001666]	cell cortex [GO:0005938]; cytoplasmic vesicle membrane [GO:0030659]; endoplasmic reticulum membrane [GO:0005789]; Golgi apparatus [GO:0005794]; Golgi membrane [GO:0000139]; intracellular membrane-bounded organelle [GO:0043231]; plasma membrane [GO:0005886]	angiotensin type II receptor activity [GO:0004945]; identical protein binding [GO:0042802]	AGTRAP	Homo sapiens (Human)	159	17419	SUBCELLULAR LOCATION: Endoplasmic reticulum membrane {ECO:0000269|PubMed:12960423}; Multi-pass membrane protein {ECO:0000269|PubMed:12960423}. Golgi apparatus membrane {ECO:0000269|PubMed:12960423}; Multi-pass membrane protein {ECO:0000269|PubMed:12960423}. Cytoplasmic vesicle membrane {ECO:0000269|PubMed:12960423}; Multi-pass membrane protein {ECO:0000269|PubMed:12960423}. Note=Present in perinu…
N : P80R	Q7LGA3	Q7LGA3	6|8|4|5	23	5.75	4	0|0|0|0|0|0|0|0|0|0|0|0|0|0|0|0	1	1	1	1	1	6.57	57.5	0		TRUE	Q7LGA3	HS2ST1	2	1.2	5	68	7.35294	TRUE	Q7LGA3	HS2ST_HUMAN	Heparan sulfate 2-O-sulfotransferase 1 (2-O-sulfotransferase) (2OST) (EC 2.8.2.-)	gene expression [GO:0010467]; heparan sulfate proteoglycan biosynthetic process [GO:0015012]; heparan sulfate proteoglycan biosynthetic process, enzymatic modification [GO:0015015]; heparan sulfate proteoglycan biosynthetic process, polysaccharide chain biosynthetic process [GO:0015014]; heparin metabolic process [GO:0030202]; ureteric bud formation [GO:0060676]	Golgi membrane [GO:0000139]; membrane [GO:0016020]	heparan sulfate 2-O-sulfotransferase activity [GO:0004394]; sulfotransferase activity [GO:0008146]	HS2ST1	Homo sapiens (Human)	356	41881	SUBCELLULAR LOCATION: Golgi apparatus membrane {ECO:0000250}; Single-pass type II membrane protein {ECO:0000250}.
N : P80R	Q8IWU5	Q8IWU5	3|2|2|3	10	2.5	4	0|0|0|0|0|0|0|0|0|0|0|0|0|0|0|1	0.97	0.99	0.97	0.99	0.97	2.98	25	0.01		TRUE	Q8IWU5	SULF2	1	1	4	68	5.88235	TRUE	Q8IWU5	SULF2_HUMAN	Extracellular sulfatase Sulf-2 (hSulf-2) (EC 3.1.6.-)	bone development [GO:0060348]; cartilage development [GO:0051216]; chondrocyte development [GO:0002063]; embryonic skeletal system development [GO:0048706]; esophagus smooth muscle contraction [GO:0014846]; glial cell-derived neurotrophic factor receptor signaling pathway [GO:0035860]; glomerular basement membrane development [GO:0032836]; glomerular filtration [GO:0003094]; heparan sulfate prote…	cell surface [GO:0009986]; endoplasmic reticulum [GO:0005783]; extracellular space [GO:0005615]; Golgi stack [GO:0005795]; plasma membrane [GO:0005886]	arylsulfatase activity [GO:0004065]; calcium ion binding [GO:0005509]; glycosaminoglycan binding [GO:0005539]; N-acetylglucosamine-6-sulfatase activity [GO:0008449]	SULF2	Homo sapiens (Human)	870	100455	SUBCELLULAR LOCATION: Endoplasmic reticulum {ECO:0000250}. Golgi apparatus, Golgi stack {ECO:0000250}. Cell surface {ECO:0000250}. Note=Also localized on the cell surface. {ECO:0000250}.
N : P80R	Q8IXI2	Q8IXI2	6|3|4|6	19	4.75	4	0|0|0|0|0|0|0|0|0|1|0|0|1|1|0|0	0.99	1	0.99	1	0.99	3.51	25.33	0		TRUE	Q8IXI2	RHOT1	5	1.4375	32	68	47.0588	TRUE	Q8IXI2	MIRO1_HUMAN	Mitochondrial Rho GTPase 1 (MIRO-1) (hMiro-1) (EC 3.6.5.-) (Rac-GTP-binding protein-like protein) (Ras homolog gene family member T1)	cellular homeostasis [GO:0019725]; mitochondrial outer membrane permeabilization [GO:0097345]; mitochondrion organization [GO:0007005]; mitochondrion transport along microtubule [GO:0047497]; regulation of mitochondrion organization [GO:0010821]; small GTPase mediated signal transduction [GO:0007264]	membrane [GO:0016020]; mitochondrial outer membrane [GO:0005741]; mitochondrion [GO:0005739]	calcium ion binding [GO:0005509]; GTP binding [GO:0005525]; GTPase activity [GO:0003924]	RHOT1	Homo sapiens (Human)	618	70784	SUBCELLULAR LOCATION: Mitochondrion outer membrane {ECO:0000269|PubMed:12482879, ECO:0000269|PubMed:19528298}; Single-pass type IV membrane protein {ECO:0000269|PubMed:12482879, ECO:0000269|PubMed:19528298}. Note=Colocalizes with MGARP and RHOT2 at the mitochondria.
N : P80R	Q8N8A6	Q8N8A6	19|18|20|20	77	19.25	4	0|0|1|1|1|0|0|0|0|0|1|1|0|0|0|1	1	1	1	1	1	24.24	51.33	0		TRUE	Q8N8A6	DDX51	16	4.57895	19	68	27.9412	TRUE	Q8N8A6	DDX51_HUMAN	ATP-dependent RNA helicase DDX51 (EC 3.6.4.13) (DEAD box protein 51)	rRNA processing [GO:0006364]	membrane [GO:0016020]; nucleolus [GO:0005730]; nucleus [GO:0005634]	ATP binding [GO:0005524]; ATP hydrolysis activity [GO:0016887]; RNA binding [GO:0003723]; RNA helicase activity [GO:0003724]	DDX51	Homo sapiens (Human)	666	72457	SUBCELLULAR LOCATION: Nucleus, nucleolus {ECO:0000250}.
N : P80R	Q8NBJ4	Q8NBJ4	2|6|8|4	20	5	4	0|0|0|0|0|0|0|0|0|0|0|0|0|0|0|0	0.99	1	0.99	1	0.99	2.98	50	0		TRUE	Q8NBJ4	GOLM1	1	1	2	68	2.94118	TRUE	Q8NBJ4	GOLM1_HUMAN	Golgi membrane protein 1 (Golgi membrane protein GP73) (Golgi phosphoprotein 2)	nucleus organization [GO:0006997]; regulation of lipid metabolic process [GO:0019216]	endoplasmic reticulum lumen [GO:0005788]; extracellular space [GO:0005615]; Golgi apparatus [GO:0005794]; plasma membrane [GO:0005886]		GOLM1	Homo sapiens (Human)	401	45333	SUBCELLULAR LOCATION: Golgi apparatus, cis-Golgi network membrane {ECO:0000269|PubMed:10831838, ECO:0000269|PubMed:12191016}; Single-pass type II membrane protein {ECO:0000269|PubMed:10831838, ECO:0000269|PubMed:12191016}. Note=Early Golgi. Cycles via the cell surface and endosomes upon lumenal pH disruption.
N : P80R	Q8NEJ9	Q8NEJ9	6|7|9|7	29	7.25	4	0|0|0|0|0|0|0|0|0|0|0|0|0|0|0|0	1	1	1	1	1	9.89	72.5	0		TRUE	Q8NEJ9	NGDN	8	3.42857	7	68	10.2941	TRUE	Q8NEJ9	NGDN_HUMAN	Neuroguidin (Centromere accumulated nuclear protein 1) (CANu1) (EIF4E-binding protein)	maturation of SSU-rRNA from tricistronic rRNA transcript (SSU-rRNA, 5.8S rRNA, LSU-rRNA) [GO:0000462]; postsynaptic modulation of chemical synaptic transmission [GO:0099170]; regulation of translation at postsynapse [GO:0140245]	axon [GO:0030424]; chromosome, centromeric region [GO:0000775]; dendrite [GO:0030425]; filopodium [GO:0030175]; glutamatergic synapse [GO:0098978]; mitochondrion [GO:0005739]; nucleolus [GO:0005730]; nucleoplasm [GO:0005654]; perforant pathway to dendrate granule cell synapse [GO:0140240]; postsynapse [GO:0098794]; small-subunit processome [GO:0032040]	RNA binding [GO:0003723]; translation regulator activity [GO:0045182]	NGDN	Homo sapiens (Human)	315	35894	SUBCELLULAR LOCATION: Nucleus {ECO:0000250}. Nucleus, nucleolus {ECO:0000269|PubMed:18547334}. Chromosome, centromere {ECO:0000269|PubMed:18547334}. Cytoplasm {ECO:0000250}. Cell projection, axon {ECO:0000250}. Cell projection, dendrite {ECO:0000250}. Cell projection, filopodium {ECO:0000250}. Note=Detected in axons, dendrites and filopodia. Colocalized with EIF4E in neurites (By similarity). Tra…
N : P80R	Q8TCT9	Q8TCT9	6|6|4|4	20	5	4	0|0|0|0|1|0|0|0|0|0|0|0|0|1|0|0	1	1	1	1	1	6.12	40	0		TRUE	Q8TCT9	HM13	5	1.61538	26	68	38.2353	TRUE	Q8TCT9	HM13_HUMAN	Minor histocompatibility antigen H13 (EC 3.4.23.-) (Intramembrane protease 1) (IMP-1) (IMPAS-1) (hIMP1) (Presenilin-like protein 3) (Signal peptide peptidase)	in utero embryonic development [GO:0001701]; membrane protein proteolysis [GO:0033619]; membrane protein proteolysis involved in retrograde protein transport, ER to cytosol [GO:1904211]; regulation of heme oxygenase activity [GO:0061960]; signal peptide processing [GO:0006465]	cell surface [GO:0009986]; cytoplasmic side of endoplasmic reticulum membrane [GO:0098554]; Derlin-1 retrotranslocation complex [GO:0036513]; endoplasmic reticulum [GO:0005783]; endoplasmic reticulum membrane [GO:0005789]; lumenal side of endoplasmic reticulum membrane [GO:0098553]; membrane [GO:0016020]; plasma membrane [GO:0005886]; rough endoplasmic reticulum [GO:0005791]	aspartic endopeptidase activity, intramembrane cleaving [GO:0042500]; peptidase activity [GO:0008233]; protein homodimerization activity [GO:0042803]; ubiquitin protein ligase binding [GO:0031625]	HM13	Homo sapiens (Human)	377	41488	SUBCELLULAR LOCATION: Endoplasmic reticulum membrane {ECO:0000269|PubMed:15998642}; Multi-pass membrane protein {ECO:0000305}. Membrane {ECO:0000269|PubMed:12077416, ECO:0000269|PubMed:15385547}; Multi-pass membrane protein {ECO:0000305}; Lumenal side {ECO:0000269|PubMed:12077416, ECO:0000269|PubMed:15385547}.; SUBCELLULAR LOCATION: [Isoform 4]: Cell membrane {ECO:0000250|UniProtKB:Q9D8V0}; Multi…
N : P80R	Q96BM9	Q96BM9	4|10|5|3	22	5.5	4	0|0|0|0|0|0|0|0|0|0|0|0|0|0|0|0	1	1	1	1	1	4.83	55	0		TRUE	Q96BM9	ARL8A	2	1.09524	21	68	30.8824	TRUE	Q96BM9	ARL8A_HUMAN	ADP-ribosylation factor-like protein 8A (ADP-ribosylation factor-like protein 10B) (Novel small G protein indispensable for equal chromosome segregation 2)	anterograde axonal transport [GO:0008089]; cell cycle [GO:0007049]; cell division [GO:0051301]; chromosome segregation [GO:0007059]; protein transport [GO:0015031]	axon cytoplasm [GO:1904115]; azurophil granule membrane [GO:0035577]; cytoplasm [GO:0005737]; extracellular exosome [GO:0070062]; ficolin-1-rich granule membrane [GO:0101003]; late endosome membrane [GO:0031902]; lysosomal membrane [GO:0005765]; membrane [GO:0016020]; midbody [GO:0030496]; plasma membrane [GO:0005886]; spindle midzone [GO:0051233]; synapse [GO:0045202]	alpha-tubulin binding [GO:0043014]; beta-tubulin binding [GO:0048487]; GTP binding [GO:0005525]; GTPase activity [GO:0003924]	ARL8A	Homo sapiens (Human)	186	21416	SUBCELLULAR LOCATION: Late endosome membrane {ECO:0000250|UniProtKB:Q9NVJ2}. Lysosome membrane {ECO:0000250|UniProtKB:Q9CQW2}. Cytoplasm, cytoskeleton, spindle {ECO:0000250|UniProtKB:Q9NVJ2}. Cell projection, axon {ECO:0000250|UniProtKB:Q9CQW2}. Synapse {ECO:0000250|UniProtKB:Q9CQW2}. Note=Localizes with microtubules at the spindle mid-zone during mitosis. {ECO:0000250|UniProtKB:Q9NVJ2}.
N : P80R	Q96EU6	Q96EU6	2|2|4|2	10	2.5	4	0|0|0|1|0|1|0|0|0|0|0|0|0|0|0|0	0.95	1	0.95	1	0.95	2.59	20	0.01		TRUE	Q96EU6	RRP36	2	1.33333	9	68	13.2353	TRUE	Q96EU6	RRP36_HUMAN	Ribosomal RNA processing protein 36 homolog	cleavage involved in rRNA processing [GO:0000469]; maturation of SSU-rRNA from tricistronic rRNA transcript (SSU-rRNA, 5.8S rRNA, LSU-rRNA) [GO:0000462]; ribosomal small subunit biogenesis [GO:0042274]; rRNA processing [GO:0006364]	90S preribosome [GO:0030686]; nucleolus [GO:0005730]; nucleoplasm [GO:0005654]	RNA binding [GO:0003723]	RRP36	Homo sapiens (Human)	259	29823	SUBCELLULAR LOCATION: Nucleus, nucleolus {ECO:0000269|PubMed:20038530}. Note=Concentrated in the fibrillar region of the nucleolus.
N : P80R	Q9NTI5	Q9NTI5	11|11|9|12	43	10.75	4	0|0|0|6|7|7|6|2|2|2|0|0|0|0|0|0	0.86	0.9	0.86	0.9	0.86	1.31	5.38	0.02		TRUE	Q9NTI5	PDS5B	16	3.5	24	68	35.2941	TRUE	Q9NTI5	PDS5B_HUMAN	Sister chromatid cohesion protein PDS5 homolog B (Androgen-induced proliferation inhibitor) (Androgen-induced prostate proliferative shutoff-associated protein AS3)	cell division [GO:0051301]; cell population proliferation [GO:0008283]; DNA repair [GO:0006281]; mitotic sister chromatid cohesion [GO:0007064]; negative regulation of cell population proliferation [GO:0008285]; regulation of cell population proliferation [GO:0042127]	chromatin [GO:0000785]; chromosome [GO:0005694]; chromosome, centromeric region [GO:0000775]; cytosol [GO:0005829]; nucleoplasm [GO:0005654]; nucleus [GO:0005634]	DNA binding [GO:0003677]	PDS5B	Homo sapiens (Human)	1447	164667	SUBCELLULAR LOCATION: Nucleus {ECO:0000250|UniProtKB:Q6TRW4}.
N : P80R	Q9NUL3	Q9NUL3	8|4|3|2	17	4.25	4	0|0|0|0|0|0|0|0|0|0|0|0|0|0|0|0	0.99	1	0.99	1	0.99	2.98	42.5	0		TRUE	Q9NUL3	STAU2	1	1	11	68	16.1765	TRUE	Q9NUL3	STAU2_HUMAN	Double-stranded RNA-binding protein Staufen homolog 2	anterograde dendritic transport of messenger ribonucleoprotein complex [GO:0098964]; cellular response to oxidative stress [GO:0034599]; eye morphogenesis [GO:0048592]; germ cell development [GO:0007281]; intracellular mRNA localization [GO:0008298]; positive regulation of dendritic spine morphogenesis [GO:0061003]; positive regulation of long-term synaptic depression [GO:1900454]; positive regul…	axon [GO:0030424]; cytoplasmic stress granule [GO:0010494]; dendrite cytoplasm [GO:0032839]; dendritic shaft [GO:0043198]; endoplasmic reticulum [GO:0005783]; membrane [GO:0016020]; messenger ribonucleoprotein complex [GO:1990124]; microtubule [GO:0005874]; neuron projection [GO:0043005]; neuronal cell body [GO:0043025]; nuclear membrane [GO:0031965]; nucleolus [GO:0005730]; plasma membrane [GO:0…	double-stranded RNA binding [GO:0003725]; Hsp70 protein binding [GO:0030544]; kinesin binding [GO:0019894]; mitogen-activated protein kinase binding [GO:0051019]; mRNA binding [GO:0003729]; ribosome binding [GO:0043022]; RNA binding [GO:0003723]	STAU2	Homo sapiens (Human)	570	62608	SUBCELLULAR LOCATION: Cytoplasm. Nucleus. Nucleus, nucleolus. Endoplasmic reticulum. Note=Shuttles between the nucleolus, nucleus and the cytoplasm. Nuclear export of isoform 1 is independent of XPO1/CRM1 and requires the exportin XPO5. Nuclear export of isoform 2 and isoform 3 can occur by both XPO1/CRM1-dependent and XPO1/CRM1-independent pathways. Found in large cytoplasmic ribonucleoprotein (…
N : P80R	Q9NVU7	Q9NVU7	2|3|5|5	15	3.75	4	0|0|0|0|2|0|1|1|0|0|0|0|0|0|0|0	0.92	1	0.92	1	0.92	1.13	15	0.01		TRUE	Q9NVU7	SDAD1	4	1.23077	13	68	19.1176	TRUE	Q9NVU7	SDA1_HUMAN	Protein SDA1 homolog (Nucleolar protein 130) (SDA1 domain-containing protein 1) (hSDA)	protein transport [GO:0015031]; ribosomal large subunit biogenesis [GO:0042273]; ribosomal large subunit export from nucleus [GO:0000055]	nucleolus [GO:0005730]; nucleoplasm [GO:0005654]		SDAD1	Homo sapiens (Human)	687	79871	SUBCELLULAR LOCATION: Nucleus, nucleolus {ECO:0000269|PubMed:11790298, ECO:0000269|PubMed:14976432}.
N : P80R	Q9NWW5	Q9NWW5	3|2|2|2	9	2.25	4	0|0|0|0|0|0|0|0|0|0|0|0|0|0|0|0	0.96	0.99	0.96	0.99	0.96	2.98	22.5	0.01		TRUE	Q9NWW5	CLN6	4	1.33333	12	68	17.6471	TRUE	Q9NWW5	CLN6_HUMAN	Ceroid-lipofuscinosis neuronal protein 6 (Protein CLN6)	cellular macromolecule catabolic process [GO:0044265]; cholesterol metabolic process [GO:0008203]; ganglioside metabolic process [GO:0001573]; glycosaminoglycan metabolic process [GO:0030203]; locomotion involved in locomotory behavior [GO:0031987]; lysosomal lumen acidification [GO:0007042]; lysosome organization [GO:0007040]; positive regulation of proteolysis [GO:0045862]; protein catabolic pr…	early endosome [GO:0005769]; endoplasmic reticulum [GO:0005783]; endoplasmic reticulum lumen [GO:0005788]; endoplasmic reticulum membrane [GO:0005789]; intracellular membrane-bounded organelle [GO:0043231]; membrane [GO:0016020]; membrane raft [GO:0045121]; nucleolus [GO:0005730]	lysophosphatidic acid binding [GO:0035727]; protein homodimerization activity [GO:0042803]; sulfatide binding [GO:0120146]	CLN6	Homo sapiens (Human)	311	35919	SUBCELLULAR LOCATION: Endoplasmic reticulum membrane {ECO:0000269|PubMed:15265688}; Multi-pass membrane protein {ECO:0000269|PubMed:15265688}. Endoplasmic reticulum {ECO:0000269|PubMed:19941651}.
N : P80R	Q9NYU2	Q9NYU2	12|10|12|13	47	11.75	4	3|3|3|5|1|4|3|1|3|5|4|6|5|2|2|3	0.91	0.99	0.91	0.99	0.91	0.95	3.55	0.01		TRUE	Q9NYU2	UGGT1	6	2.36667	30	68	44.1176	TRUE	Q9NYU2	UGGG1_HUMAN	UDP-glucose:glycoprotein glucosyltransferase 1 (UGT1) (hUGT1) (EC 2.4.1.-) (UDP--Glc:glycoprotein glucosyltransferase) (UDP-glucose ceramide glucosyltransferase-like 1)	'de novo' post-translational protein folding [GO:0051084]; endoplasmic reticulum mannose trimming [GO:1904380]; ER-associated misfolded protein catabolic process [GO:0071712]; protein N-linked glycosylation via asparagine [GO:0018279]	endoplasmic reticulum [GO:0005783]; endoplasmic reticulum lumen [GO:0005788]; endoplasmic reticulum quality control compartment [GO:0044322]; endoplasmic reticulum-Golgi intermediate compartment [GO:0005793]; extracellular exosome [GO:0070062]; protein-containing complex [GO:0032991]	UDP-glucose:glycoprotein glucosyltransferase activity [GO:0003980]; unfolded protein binding [GO:0051082]	UGGT1	Homo sapiens (Human)	1555	177190	SUBCELLULAR LOCATION: Endoplasmic reticulum lumen {ECO:0000255|PROSITE-ProRule:PRU10138, ECO:0000269|PubMed:10694380}. Endoplasmic reticulum-Golgi intermediate compartment {ECO:0000255|PROSITE-ProRule:PRU10138, ECO:0000269|PubMed:10694380}.
N : P80R	Q9UGR2	Q9UGR2	2|3|4|3	12	3	4	0|0|0|0|1|0|1|0|0|0|0|0|0|0|0|0	0.98	1	0.98	1	0.98	2.59	24	0		TRUE	Q9UGR2	ZC3H7B	3	1.83333	6	68	8.82353	TRUE	Q9UGR2	Z3H7B_HUMAN	Zinc finger CCCH domain-containing protein 7B (Rotavirus 'X'-associated non-structural protein) (RoXaN)	miRNA processing [GO:0035196]; post-transcriptional regulation of gene expression [GO:0010608]	nucleus [GO:0005634]	metal ion binding [GO:0046872]; miRNA binding [GO:0035198]; RNA binding [GO:0003723]	ZC3H7B	Homo sapiens (Human)	977	109858	SUBCELLULAR LOCATION: Nucleus {ECO:0000269|PubMed:18799579}. Note=Nuclear localization seems to be depleted upon rotavirus A infection.
N : P80R	Q9UI10	Q9UI10	5|5|4|3	17	4.25	4	0|1|1|0|0|0|0|0|0|2|0|0|0|1|0|0	0.98	1	0.98	1	0.98	2.54	13.6	0		TRUE	Q9UI10	EIF2B4	6	1.40909	22	68	32.3529	TRUE	Q9UI10	EI2BD_HUMAN	Translation initiation factor eIF-2B subunit delta (eIF-2B GDP-GTP exchange factor subunit delta)	myelination [GO:0042552]; oligodendrocyte development [GO:0014003]; ovarian follicle development [GO:0001541]; regulation of catalytic activity [GO:0050790]; regulation of translation [GO:0006417]; response to glucose [GO:0009749]; response to heat [GO:0009408]; response to peptide hormone [GO:0043434]; T cell receptor signaling pathway [GO:0050852]; translational initiation [GO:0006413]	cytoplasm [GO:0005737]; cytosol [GO:0005829]; eukaryotic translation initiation factor 2B complex [GO:0005851]	translation initiation factor activity [GO:0003743]; translation initiation factor binding [GO:0031369]	EIF2B4	Homo sapiens (Human)	523	57557
N : P80R	Q9Y673	Q9Y673	3|8|4|5	20	5	4	0|0|0|0|0|0|0|0|0|0|0|0|0|0|0|0	1	1	1	1	1	4.83	50	0		TRUE	Q9Y673	ALG5	5	2	6	68	8.82353	TRUE	Q9Y673	ALG5_HUMAN	Dolichyl-phosphate beta-glucosyltransferase (DolP-glucosyltransferase) (EC 2.4.1.117) (Asparagine-linked glycosylation protein 5 homolog)	determination of left/right symmetry [GO:0007368]; protein glycosylation [GO:0006486]; protein N-linked glycosylation [GO:0006487]; protein N-linked glycosylation via asparagine [GO:0018279]	endoplasmic reticulum membrane [GO:0005789]; membrane [GO:0016020]	dolichyl-phosphate beta-glucosyltransferase activity [GO:0004581]; oligosaccharyl transferase activity [GO:0004576]	ALG5	Homo sapiens (Human)	324	36946	SUBCELLULAR LOCATION: Endoplasmic reticulum membrane {ECO:0000250}; Single-pass type II membrane protein {ECO:0000250}.
N : R203M	A0AV96	A0AV96	3|7|14|7	31	7.75	4	0|0|0|1|1|0|0|0|0|0|0|1|0|0|0|0	0.99	1	0.99	1	0.99	3.51	41.33	0		TRUE	A0AV96	RBM47	2	1.2	5	68	7.35294	TRUE	A0AV96	RBM47_HUMAN	RNA-binding protein 47 (RNA-binding motif protein 47)	cytidine to uridine editing [GO:0016554]; hematopoietic progenitor cell differentiation [GO:0002244]	nucleus [GO:0005634]	mRNA binding [GO:0003729]; RNA binding [GO:0003723]	RBM47	Homo sapiens (Human)	593	64099	SUBCELLULAR LOCATION: Nucleus {ECO:0000250}.
N : R203M	A6ND36	A6ND36	5|3|4|3	15	3.75	4	0|0|0|0|0|0|0|0|0|0|0|0|0|0|0|0	1	1	1	1	1	4.83	37.5	0		TRUE	A6ND36	FAM83G	3	1.22222	18	68	26.4706	TRUE	A6ND36	FA83G_HUMAN	Protein FAM83G (Protein associated with SMAD1)	BMP signaling pathway [GO:0030509]; signal transduction [GO:0007165]	cytosol [GO:0005829]; nucleus [GO:0005634]	protein kinase binding [GO:0019901]	FAM83G	Homo sapiens (Human)	823	90835	SUBCELLULAR LOCATION: Cytoplasm, cytosol {ECO:0000269|PubMed:24554596}. Nucleus {ECO:0000269|PubMed:24554596}. Note=Detected predominantly in cytosolic. Upon BMP stimulation, a small portion of PAWS1 is detected in the nucleus. {ECO:0000269|PubMed:24554596}.
N : R203M	O00186	O00186	4|4|7|8	23	5.75	4	0|0|0|0|0|1|0|0|0|0|0|0|1|2|2|1	0.98	1	0.98	1	0.98	3.07	13.14	0		TRUE	O00186	STXBP3	3	1.53571	28	68	41.1765	TRUE	O00186	STXB3_HUMAN	Syntaxin-binding protein 3 (Platelet Sec1 protein) (PSP) (Protein unc-18 homolog 3) (Unc18-3) (Protein unc-18 homolog C) (Unc-18C)	brain development [GO:0007420]; cellular glucose homeostasis [GO:0001678]; cellular response to type II interferon [GO:0071346]; insulin secretion [GO:0030073]; intracellular protein transport [GO:0006886]; negative regulation of calcium ion-dependent exocytosis [GO:0045955]; negative regulation of glucose import [GO:0046325]; neurotransmitter secretion [GO:0007269]; neutrophil degranulation [GO:…	apical plasma membrane [GO:0016324]; basolateral plasma membrane [GO:0016323]; cytosol [GO:0005829]; extracellular exosome [GO:0070062]; phagocytic vesicle [GO:0045335]; plasma membrane [GO:0005886]; platelet alpha granule [GO:0031091]; presynapse [GO:0098793]; secretory granule [GO:0030141]; specific granule [GO:0042581]; tertiary granule [GO:0070820]	protein-containing complex binding [GO:0044877]; syntaxin binding [GO:0019905]; syntaxin-1 binding [GO:0017075]	STXBP3	Homo sapiens (Human)	592	67764	SUBCELLULAR LOCATION: Cytoplasm, cytosol {ECO:0000269|PubMed:10194441}. Cell membrane {ECO:0000269|PubMed:10194441}. Note=In platelets, predominantly cytosolic. Low amounts membrane-associated.
N : R203M	O00463	O00463	2|4|3|3	12	3	4	0|2|1|0|0|0|1|0|0|1|0|2|0|0|0|0	0.79	0.96	0.79	0.96	0.79	0.13	6.86	0.04		TRUE	O00463	TRAF5	2	1.4	10	68	14.7059	TRUE	O00463	TRAF5_HUMAN	TNF receptor-associated factor 5 (RING finger protein 84)	apoptotic process [GO:0006915]; interleukin-17-mediated signaling pathway [GO:0097400]; mRNA stabilization [GO:0048255]; positive regulation of cell population proliferation [GO:0008284]; positive regulation of DNA-binding transcription factor activity [GO:0051091]; positive regulation of I-kappaB kinase/NF-kappaB signaling [GO:0043123]; positive regulation of JNK cascade [GO:0046330]; positive r…	CD40 receptor complex [GO:0035631]; centrosome [GO:0005813]; cytoplasmic side of plasma membrane [GO:0009898]; cytosol [GO:0005829]	identical protein binding [GO:0042802]; thioesterase binding [GO:0031996]; tumor necrosis factor receptor binding [GO:0005164]; ubiquitin protein ligase binding [GO:0031625]; zinc ion binding [GO:0008270]	TRAF5	Homo sapiens (Human)	557	64406	SUBCELLULAR LOCATION: Cytoplasm {ECO:0000305|PubMed:15121867}. Cytoplasm, cytosol {ECO:0000269|PubMed:15121867}.
N : R203M	O60504	O60504	4|5|5|4	18	4.5	4	0|0|0|0|0|0|0|0|0|0|0|0|2|1|0|0	0.99	0.99	0.99	0.99	0.99	4.11	24	0		TRUE	O60504	SORBS3	3	1.33333	9	68	13.2353	TRUE	O60504	VINEX_HUMAN	Vinexin (SH3-containing adapter molecule 1) (SCAM-1) (Sorbin and SH3 domain-containing protein 3)	actin filament organization [GO:0007015]; cell adhesion [GO:0007155]; cell-substrate adhesion [GO:0031589]; MAPK cascade [GO:0000165]; negative regulation of transcription by RNA polymerase II [GO:0000122]; positive regulation of cytoskeleton organization [GO:0051495]; positive regulation of MAPK cascade [GO:0043410]; positive regulation of stress fiber assembly [GO:0051496]	cell-substrate junction [GO:0030055]; cytoplasm [GO:0005737]; cytoskeleton [GO:0005856]; cytosol [GO:0005829]; focal adhesion [GO:0005925]; nucleus [GO:0005634]	structural constituent of cytoskeleton [GO:0005200]; vinculin binding [GO:0017166]	SORBS3	Homo sapiens (Human)	671	75341	SUBCELLULAR LOCATION: [Isoform Alpha]: Cell junction {ECO:0000250}. Cytoplasm, cytoskeleton {ECO:0000250}. Note=Localized at cell-extracellular matrix junctions (By similarity). Both isoforms were localized at focal adhesion and cell-cell adhesion sites. {ECO:0000250}.; SUBCELLULAR LOCATION: [Isoform Beta]: Cell junction {ECO:0000250}. Nucleus. Cytoplasm, cytoskeleton {ECO:0000250}. Note=Localize…
N : R203M	O75874	O75874	12|11|11|12	46	11.5	4	3|3|2|0|0|1|2|0|1|1|2|3|9|10|2|2	0.84	0.87	0.84	0.87	0.84	1.5	4.49	0.03		TRUE	O75874	IDH1	14	3.46667	30	68	44.1176	TRUE	O75874	IDHC_HUMAN	Isocitrate dehydrogenase [NADP] cytoplasmic (IDH) (IDH1) (EC 1.1.1.42) (Cytosolic NADP-isocitrate dehydrogenase) (IDPc) (NADP(+)-specific ICDH) (Oxalosuccinate decarboxylase)	2-oxoglutarate metabolic process [GO:0006103]; female gonad development [GO:0008585]; glutathione metabolic process [GO:0006749]; glyoxylate cycle [GO:0006097]; isocitrate metabolic process [GO:0006102]; NADP metabolic process [GO:0006739]; regulation of phospholipid biosynthetic process [GO:0071071]; regulation of phospholipid catabolic process [GO:0060696]; response to oxidative stress [GO:0006…	cytoplasm [GO:0005737]; cytosol [GO:0005829]; extracellular exosome [GO:0070062]; extracellular region [GO:0005576]; ficolin-1-rich granule lumen [GO:1904813]; mitochondrion [GO:0005739]; peroxisomal matrix [GO:0005782]; peroxisome [GO:0005777]; secretory granule lumen [GO:0034774]; tertiary granule lumen [GO:1904724]	cadherin binding [GO:0045296]; identical protein binding [GO:0042802]; isocitrate dehydrogenase (NADP+) activity [GO:0004450]; magnesium ion binding [GO:0000287]; NAD binding [GO:0051287]; NADP binding [GO:0050661]; protein homodimerization activity [GO:0042803]	IDH1	Homo sapiens (Human)	414	46659	SUBCELLULAR LOCATION: Cytoplasm, cytosol {ECO:0000269|PubMed:10521434}. Peroxisome {ECO:0000269|PubMed:10521434}.
N : R203M	O95758	O95758	4|2|5|4	15	3.75	4	0|0|0|0|2|0|0|1|0|0|0|0|0|1|0|0	0.93	1	0.93	1	0.93	1.13	15	0.01		TRUE	O95758	PTBP3	1	1	4	68	5.88235	TRUE	O95758	PTBP3_HUMAN	Polypyrimidine tract-binding protein 3 (Regulator of differentiation 1) (Rod1)	anatomical structure morphogenesis [GO:0009653]; erythrocyte maturation [GO:0043249]; mRNA processing [GO:0006397]; negative regulation of RNA splicing [GO:0033119]; regulation of cell differentiation [GO:0045595]; regulation of RNA splicing [GO:0043484]; RNA splicing [GO:0008380]	nucleus [GO:0005634]	mRNA binding [GO:0003729]; RNA binding [GO:0003723]	PTBP3	Homo sapiens (Human)	552	59690
N : R203M	P00374	P00374	5|10|3|4	22	5.5	4	0|0|0|0|0|0|0|0|0|0|0|0|0|0|0|0	1	1	1	1	1	4.83	55	0		TRUE	P00374	DHFR	3	2	2	68	2.94118	TRUE	P00374	DYR_HUMAN	Dihydrofolate reductase (EC 1.5.1.3)	axon regeneration [GO:0031103]; dihydrofolate metabolic process [GO:0046452]; folic acid metabolic process [GO:0046655]; glycine biosynthetic process [GO:0006545]; negative regulation of translation [GO:0017148]; one-carbon metabolic process [GO:0006730]; positive regulation of nitric-oxide synthase activity [GO:0051000]; regulation of removal of superoxide radicals [GO:2000121]; response to meth…	cytosol [GO:0005829]; mitochondrion [GO:0005739]	dihydrofolate reductase activity [GO:0004146]; folic acid binding [GO:0005542]; mRNA binding [GO:0003729]; mRNA regulatory element binding translation repressor activity [GO:0000900]; NADP binding [GO:0050661]; NADPH binding [GO:0070402]; sequence-specific mRNA binding [GO:1990825]	DHFR	Homo sapiens (Human)	187	21453	SUBCELLULAR LOCATION: Mitochondrion {ECO:0000250|UniProtKB:P00375}. Cytoplasm {ECO:0000250|UniProtKB:P00375}.
N : R203M	P04114	P04114	5|5|2|2	14	3.5	4	0|0|0|0|0|0|0|1|0|0|0|0|0|0|0|1	0.97	1	0.97	1	0.97	2.59	28	0.01		TRUE	P04114	APOB	7	2.42857	7	68	10.2941	TRUE	P04114	APOB_HUMAN	Apolipoprotein B-100 (Apo B-100) [Cleaved into: Apolipoprotein B-48 (Apo B-48)]	artery morphogenesis [GO:0048844]; cellular response to prostaglandin stimulus [GO:0071379]; cellular response to tumor necrosis factor [GO:0071356]; cholesterol efflux [GO:0033344]; cholesterol homeostasis [GO:0042632]; cholesterol metabolic process [GO:0008203]; cholesterol transport [GO:0030301]; establishment of localization in cell [GO:0051649]; fertilization [GO:0009566]; flagellated sperm …	chylomicron [GO:0042627]; chylomicron remnant [GO:0034360]; clathrin-coated endocytic vesicle membrane [GO:0030669]; cytoplasm [GO:0005737]; cytosol [GO:0005829]; early endosome [GO:0005769]; endocytic vesicle lumen [GO:0071682]; endoplasmic reticulum exit site [GO:0070971]; endoplasmic reticulum lumen [GO:0005788]; endoplasmic reticulum membrane [GO:0005789]; endosome lumen [GO:0031904]; endosom…	cholesterol transfer activity [GO:0120020]; heparin binding [GO:0008201]; lipase binding [GO:0035473]; low-density lipoprotein particle receptor binding [GO:0050750]; phospholipid binding [GO:0005543]	APOB	Homo sapiens (Human)	4563	515605	SUBCELLULAR LOCATION: Cytoplasm {ECO:0000269|PubMed:22580899}. Secreted {ECO:0000269|PubMed:22580899, ECO:0000269|PubMed:26224785}. Lipid droplet {ECO:0000269|PubMed:28183703}.
N : R203M	P0DTC9	P0DTC9	429|420|417|410	1676	419	4	0|0|0|0|0|0|0|0|0|0|0|0|0|0|0|0	1	1	1	1	1	582.65	4190	0		TRUE								TRUE	P0DTC9	NCAP_SARS2	Nucleoprotein (N) (Nucleocapsid protein) (NC) (Protein N)	negative regulation of interferon-beta production [GO:0032688]; positive regulation of NLRP3 inflammasome complex assembly [GO:1900227]; response to host immune response [GO:0052572]; viral RNA genome packaging [GO:0019074]	host cell endoplasmic reticulum-Golgi intermediate compartment [GO:0044172]; host cell Golgi apparatus [GO:0044177]; host cell perinuclear region of cytoplasm [GO:0044220]; intracellular non-membrane-bounded organelle [GO:0043232]; MHC class I protein complex [GO:0042612]; ribonucleoprotein complex [GO:1990904]; viral capsid [GO:0019028]; viral nucleocapsid [GO:0019013]	identical protein binding [GO:0042802]; MHC class I protein binding [GO:0042288]; molecular condensate scaffold activity [GO:0140693]; protein homodimerization activity [GO:0042803]; RNA binding [GO:0003723]; RNA stem-loop binding [GO:0035613]	N	Severe acute respiratory syndrome coronavirus 2 (2019-nCoV) (SARS-CoV-2)	419	45626	SUBCELLULAR LOCATION: Virion {ECO:0000255|HAMAP-Rule:MF_04096}. Host cytoplasm {ECO:0000269|PubMed:33060197, ECO:0000269|PubMed:34341353}. Secreted {ECO:0000269|PubMed:35921414}. Host extracellular space {ECO:0000269|PubMed:35921414}. Note=Probably associates with ER-derived membranes where it participates in viral RNA synthesis and virus budding. When located inside the virion, complexed with th…
N : R203M	P15121	P15121	2|3|3|4	12	3	4	0|0|0|0|0|0|0|0|0|0|0|0|0|0|0|0	0.98	1	0.98	1	0.98	2.98	30	0		TRUE								TRUE	P15121	ALDR_HUMAN	Aldo-keto reductase family 1 member B1 (EC 1.1.1.300) (EC 1.1.1.372) (EC 1.1.1.54) (Aldehyde reductase) (Aldose reductase) (AR) (EC 1.1.1.21)	C21-steroid hormone biosynthetic process [GO:0006700]; carbohydrate metabolic process [GO:0005975]; cellular hyperosmotic salinity response [GO:0071475]; daunorubicin metabolic process [GO:0044597]; doxorubicin metabolic process [GO:0044598]; epithelial cell maturation [GO:0002070]; fructose biosynthetic process [GO:0046370]; metanephric collecting duct development [GO:0072205]; negative regulati…	cytosol [GO:0005829]; extracellular exosome [GO:0070062]; extracellular space [GO:0005615]; nucleoplasm [GO:0005654]	alditol:NADP+ 1-oxidoreductase activity [GO:0004032]; allyl-alcohol dehydrogenase activity [GO:0047655]; electron transfer activity [GO:0009055]; glyceraldehyde oxidoreductase activity [GO:0043795]; glycerol dehydrogenase [NADP+] activity [GO:0047956]; NADP-retinol dehydrogenase activity [GO:0052650]; prostaglandin H2 endoperoxidase reductase activity [GO:0036130]; retinal dehydrogenase activity …	AKR1B1	Homo sapiens (Human)	316	35853	SUBCELLULAR LOCATION: Cytoplasm.
N : R203M	P34913	P34913	5|2|3|2	12	3	4	0|0|0|0|0|0|0|0|0|0|0|0|1|2|0|0	0.91	0.99	0.91	0.99	0.91	1.7	16	0.01		TRUE	P34913	EPHX2	2	1.33333	12	68	17.6471	TRUE	P34913	HYES_HUMAN	Bifunctional epoxide hydrolase 2 [Includes: Cytosolic epoxide hydrolase 2 (CEH) (EC 3.3.2.10) (Epoxide hydratase) (Soluble epoxide hydrolase) (SEH); Lipid-phosphate phosphatase (EC 3.1.3.76)]	cholesterol homeostasis [GO:0042632]; dephosphorylation [GO:0016311]; epoxide metabolic process [GO:0097176]; phospholipid dephosphorylation [GO:0046839]; positive regulation of gene expression [GO:0010628]; regulation of cholesterol metabolic process [GO:0090181]; response to toxic substance [GO:0009636]; stilbene catabolic process [GO:0046272]	cytosol [GO:0005829]; extracellular exosome [GO:0070062]; peroxisomal matrix [GO:0005782]; peroxisome [GO:0005777]	10-hydroxy-9-(phosphonooxy)octadecanoate phosphatase activity [GO:0033885]; epoxide hydrolase activity [GO:0004301]; hydrolase activity [GO:0016787]; lipid phosphatase activity [GO:0042577]; lysophosphatidic acid phosphatase activity [GO:0052642]; magnesium ion binding [GO:0000287]; phosphatase activity [GO:0016791]; protein homodimerization activity [GO:0042803]; toxic substance binding [GO:0015…	EPHX2	Homo sapiens (Human)	555	62616	SUBCELLULAR LOCATION: Cytoplasm. Peroxisome.
N : R203M	P36915	P36915	3|3|4|2	12	3	4	0|0|0|0|0|0|0|0|0|0|0|0|0|0|0|0	0.98	1	0.98	1	0.98	2.98	30	0		TRUE	P36915	GNL1	1	1	3	68	4.41176	TRUE	P36915	GNL1_HUMAN	Guanine nucleotide-binding protein-like 1 (GTP-binding protein HSR1)	cellular response to DNA damage stimulus [GO:0006974]; signal transduction [GO:0007165]; T cell mediated immunity [GO:0002456]	extracellular space [GO:0005615]; nucleus [GO:0005634]	GTP binding [GO:0005525]; GTPase activity [GO:0003924]; structural molecule activity [GO:0005198]	GNL1	Homo sapiens (Human)	607	68661
N : R203M	P49840	P49840	20|17|17|18	72	18	4	1|1|0|2|3|1|1|0|0|1|1|0|0|0|1|1	1	1	1	1	1	19.1	22.15	0		TRUE	P49840	GSK3A	5	1.55556	27	68	39.7059	TRUE	P49840	GSK3A_HUMAN	Glycogen synthase kinase-3 alpha (GSK-3 alpha) (EC 2.7.11.26) (Serine/threonine-protein kinase GSK3A) (EC 2.7.11.1)	aging [GO:0007568]; cardiac left ventricle morphogenesis [GO:0003214]; cell migration [GO:0016477]; cellular response to glucocorticoid stimulus [GO:0071385]; cellular response to insulin stimulus [GO:0032869]; cellular response to interleukin-3 [GO:0036016]; cellular response to lithium ion [GO:0071285]; dopamine receptor signaling pathway [GO:0007212]; excitatory postsynaptic potential [GO:0060…	apical dendrite [GO:0097440]; axon [GO:0030424]; beta-catenin destruction complex [GO:0030877]; cytoplasm [GO:0005737]; cytosol [GO:0005829]; microtubule [GO:0005874]; mitochondrion [GO:0005739]; neuronal cell body [GO:0043025]; nucleus [GO:0005634]; postsynapse [GO:0098794]; proximal dendrite [GO:1990635]	ATP binding [GO:0005524]; protein kinase A catalytic subunit binding [GO:0034236]; protein serine kinase activity [GO:0106310]; protein serine/threonine kinase activity [GO:0004674]; protein serine/threonine kinase binding [GO:0120283]; signaling receptor binding [GO:0005102]; tau protein binding [GO:0048156]; tau-protein kinase activity [GO:0050321]	GSK3A	Homo sapiens (Human)	483	50981
N : R203M	P50749	P50749	2|6|3|4	15	3.75	4	0|0|0|0|0|0|0|0|0|0|0|0|0|0|1|2	0.94	1	0.94	1	0.94	1.7	20	0.01		TRUE	P50749	RASSF2	3	1.44444	9	68	13.2353	TRUE	P50749	RASF2_HUMAN	Ras association domain-containing protein 2	bone remodeling [GO:0046849]; cell cycle [GO:0007049]; epidermal growth factor receptor signaling pathway via I-kappaB kinase/NF-kappaB cascade [GO:0038168]; homeostasis of number of cells [GO:0048872]; negative regulation of NIK/NF-kappaB signaling [GO:1901223]; negative regulation of peptidyl-serine phosphorylation [GO:0033137]; ossification [GO:0001503]; positive regulation of apoptotic proces…	cytoplasm [GO:0005737]; cytosol [GO:0005829]; Golgi apparatus [GO:0005794]; kinetochore [GO:0000776]; nucleoplasm [GO:0005654]; nucleus [GO:0005634]; plasma membrane [GO:0005886]; protein-containing complex [GO:0032991]	protein kinase activity [GO:0004672]	RASSF2	Homo sapiens (Human)	326	37790	SUBCELLULAR LOCATION: Nucleus. Cytoplasm. Chromosome, centromere, kinetochore {ECO:0000269|PubMed:20813266}. Note=Translocates to the cytoplasm in the presence of STK3/MST2 and STK4/MST1.
N : R203M	P55263	P55263	8|4|3|5	20	5	4	1|0|0|1|0|0|0|0|0|0|0|1|1|1|0|0	0.97	1	0.97	1	0.97	2.36	16	0.01		TRUE	P55263	ADK	1	1	3	68	4.41176	TRUE	P55263	ADK_HUMAN	Adenosine kinase (AK) (EC 2.7.1.20) (Adenosine 5'-phosphotransferase)	AMP salvage [GO:0044209]; dAMP salvage [GO:0106383]; dATP biosynthetic process [GO:0006175]; GMP salvage [GO:0032263]; phosphorylation [GO:0016310]; purine nucleobase metabolic process [GO:0006144]; purine ribonucleoside salvage [GO:0006166]; ribonucleoside monophosphate biosynthetic process [GO:0009156]	cytosol [GO:0005829]; nucleoplasm [GO:0005654]; nucleus [GO:0005634]; plasma membrane [GO:0005886]	adenosine kinase activity [GO:0004001]; ATP binding [GO:0005524]; deoxyadenosine kinase activity [GO:0004136]; metal ion binding [GO:0046872]; RNA binding [GO:0003723]	ADK	Homo sapiens (Human)	362	40545	SUBCELLULAR LOCATION: [Isoform 1]: Nucleus {ECO:0000269|PubMed:19635462}.; SUBCELLULAR LOCATION: [Isoform 2]: Cytoplasm {ECO:0000269|PubMed:19635462}.
N : R203M	P56377	P56377	3|2|2|3	10	2.5	4	0|0|0|0|0|0|0|0|0|0|0|0|0|1|0|0	0.97	0.99	0.97	0.99	0.97	2.98	25	0.01		TRUE	P56377	AP1S2	2	1.2	10	68	14.7059	TRUE	P56377	AP1S2_HUMAN	AP-1 complex subunit sigma-2 (Adaptor protein complex AP-1 subunit sigma-1B) (Adaptor-related protein complex 1 subunit sigma-1B) (Clathrin assembly protein complex 1 sigma-1B small chain) (Golgi adaptor HA1/AP1 adaptin sigma-1B subunit) (Sigma 1B subunit of AP-1 clathrin) (Sigma-adaptin 1B) (Sigma1B-adaptin)	intracellular protein transport [GO:0006886]; melanosome assembly [GO:1903232]; platelet dense granule organization [GO:0060155]; vesicle-mediated transport [GO:0016192]	AP-1 adaptor complex [GO:0030121]; AP-type membrane coat adaptor complex [GO:0030119]; clathrin-coated pit [GO:0005905]; cytoplasmic vesicle membrane [GO:0030659]; cytosol [GO:0005829]; early endosome [GO:0005769]; Golgi apparatus [GO:0005794]; Golgi membrane [GO:0000139]; intracellular membrane-bounded organelle [GO:0043231]; lysosomal membrane [GO:0005765]; trans-Golgi network membrane [GO:0032…	clathrin adaptor activity [GO:0035615]	AP1S2	Homo sapiens (Human)	157	18615	SUBCELLULAR LOCATION: Golgi apparatus. Cytoplasmic vesicle membrane; Peripheral membrane protein; Cytoplasmic side. Membrane, clathrin-coated pit. Note=Component of the coat surrounding the cytoplasmic face of coated vesicles located at the Golgi complex.
N : R203M	Q00577	Q00577	6|4|5|7	22	5.5	4	0|0|0|1|1|1|1|0|0|0|0|0|1|0|0|0	0.99	1	0.99	1	0.99	3.92	17.6	0		TRUE	Q00577	PURA	5	1.59259	27	68	39.7059	TRUE	Q00577	PURA_HUMAN	Transcriptional activator protein Pur-alpha (Purine-rich single-stranded DNA-binding protein alpha)	cell differentiation [GO:0030154]; dendritic transport of messenger ribonucleoprotein complex [GO:0098963]; DNA replication initiation [GO:0006270]; DNA unwinding involved in DNA replication [GO:0006268]; epithelial cell proliferation [GO:0050673]; lymphocyte proliferation [GO:0046651]; negative regulation of DNA-binding transcription factor activity [GO:0043433]; negative regulation of transcrip…	chromosome, telomeric region [GO:0000781]; dendrite cytoplasm [GO:0032839]; glutamatergic synapse [GO:0098978]; neuronal cell body [GO:0043025]; nucleus [GO:0005634]; postsynapse [GO:0098794]	DNA-binding transcription factor activity, RNA polymerase II-specific [GO:0000981]; DNA-binding transcription factor binding [GO:0140297]; double-stranded telomeric DNA binding [GO:0003691]; mRNA regulatory element binding translation repressor activity [GO:0000900]; purine-rich negative regulatory element binding [GO:0032422]; RNA binding [GO:0003723]; RNA polymerase II transcription regulatory …	PURA	Homo sapiens (Human)	322	34911	SUBCELLULAR LOCATION: Nucleus.
N : R203M	Q05397	Q05397	8|10|8|9	35	8.75	4	0|0|0|0|0|0|0|0|0|0|0|0|1|2|3|1	1	1	1	1	1	5.41	20	0		TRUE	Q05397	PTK2	3	1.63636	11	68	16.1765	TRUE	Q05397	FAK1_HUMAN	Focal adhesion kinase 1 (FADK 1) (EC 2.7.10.2) (Focal adhesion kinase-related nonkinase) (FRNK) (Protein phosphatase 1 regulatory subunit 71) (PPP1R71) (Protein-tyrosine kinase 2) (p125FAK) (pp125FAK)	angiogenesis [GO:0001525]; axon guidance [GO:0007411]; cell differentiation [GO:0030154]; cell migration [GO:0016477]; cell motility [GO:0048870]; detection of muscle stretch [GO:0035995]; ephrin receptor signaling pathway [GO:0048013]; epidermal growth factor receptor signaling pathway [GO:0007173]; establishment of cell polarity [GO:0030010]; Fc-gamma receptor signaling pathway involved in phag…	cell cortex [GO:0005938]; ciliary basal body [GO:0036064]; cytoplasm [GO:0005737]; cytoskeleton [GO:0005856]; cytosol [GO:0005829]; dendritic spine [GO:0043197]; extrinsic component of cytoplasmic side of plasma membrane [GO:0031234]; focal adhesion [GO:0005925]; intracellular membrane-bounded organelle [GO:0043231]; nucleus [GO:0005634]; perinuclear region of cytoplasm [GO:0048471]; plasma membr…	actin binding [GO:0003779]; ATP binding [GO:0005524]; integrin binding [GO:0005178]; JUN kinase binding [GO:0008432]; molecular function activator activity [GO:0140677]; non-membrane spanning protein tyrosine kinase activity [GO:0004715]; protein kinase binding [GO:0019901]; protein phosphatase binding [GO:0019903]; protein tyrosine kinase activity [GO:0004713]; protein tyrosine phosphatase activ…	PTK2	Homo sapiens (Human)	1052	119233	SUBCELLULAR LOCATION: Cell junction, focal adhesion {ECO:0000269|PubMed:10655584, ECO:0000269|PubMed:15855171, ECO:0000269|PubMed:18206965, ECO:0000269|PubMed:18256281, ECO:0000269|PubMed:31630787}. Cell membrane {ECO:0000250|UniProtKB:Q00944}; Peripheral membrane protein {ECO:0000250|UniProtKB:Q00944}; Cytoplasmic side {ECO:0000250|UniProtKB:Q00944}. Cytoplasm, perinuclear region {ECO:0000269|Pu…
N : R203M	Q08257	Q08257	9|8|6|11	34	8.5	4	0|0|0|0|0|0|0|0|0|0|0|0|0|1|1|0	1	1	1	1	1	9.41	68	0		TRUE	Q08257	CRYZ	2	1.14286	7	68	10.2941	TRUE	Q08257	QOR_HUMAN	Quinone oxidoreductase (EC 1.6.5.5) (NADPH:quinone reductase) (Zeta-crystallin)	protein homotetramerization [GO:0051289]; visual perception [GO:0007601]; xenobiotic catabolic process [GO:0042178]	cytosol [GO:0005829]; extracellular exosome [GO:0070062]	identical protein binding [GO:0042802]; mRNA 3'-UTR binding [GO:0003730]; NADPH binding [GO:0070402]; NADPH:quinone reductase activity [GO:0003960]; zinc ion binding [GO:0008270]	CRYZ	Homo sapiens (Human)	329	35207	SUBCELLULAR LOCATION: Cytoplasm {ECO:0000269|PubMed:20103721}.
N : R203M	Q12849	Q12849	8|8|4|7	27	6.75	4	0|0|0|0|0|0|1|0|0|0|0|0|0|1|0|0	1	1	1	1	1	6.12	54	0		TRUE	Q12849	GRSF1	5	2	33	68	48.5294	TRUE	Q12849	GRSF1_HUMAN	G-rich sequence factor 1 (GRSF-1)	anterior/posterior pattern specification [GO:0009952]; morphogenesis of embryonic epithelium [GO:0016331]; mRNA polyadenylation [GO:0006378]; positive regulation of mitochondrial RNA catabolic process [GO:0000962]; regulation of RNA splicing [GO:0043484]; tRNA processing [GO:0008033]	cytoplasm [GO:0005737]; mitochondrial nucleoid [GO:0042645]; mitochondrion [GO:0005739]; nucleoplasm [GO:0005654]; ribonucleoprotein complex [GO:1990904]; ribonucleoprotein granule [GO:0035770]	mRNA binding [GO:0003729]; RNA binding [GO:0003723]	GRSF1	Homo sapiens (Human)	480	53126	SUBCELLULAR LOCATION: [Isoform 1]: Mitochondrion matrix {ECO:0000269|PubMed:23473033, ECO:0000269|PubMed:23473034, ECO:0000269|PubMed:25683715, ECO:0000269|PubMed:29967381}. Note=Localizes to mitochondrial RNA granules found in close proximity to the mitochondrial nucleoids. {ECO:0000269|PubMed:23473033, ECO:0000269|PubMed:23473034, ECO:0000269|PubMed:25683715}.; SUBCELLULAR LOCATION: [Isoform 2]…
N : R203M	Q12986	Q12986	11|12|12|7	42	10.5	4	1|0|0|2|2|1|0|1|0|0|1|1|0|0|0|0	1	1	1	1	1	6.6	18.67	0		TRUE	Q12986	NFX1	4	2.09375	32	68	47.0588	TRUE	Q12986	NFX1_HUMAN	Transcriptional repressor NF-X1 (EC 2.3.2.-) (Nuclear transcription factor, X box-binding protein 1)	inflammatory response [GO:0006954]; negative regulation of MHC class II biosynthetic process [GO:0045347]; negative regulation of transcription by RNA polymerase II [GO:0000122]; protein autoubiquitination [GO:0051865]; protein ubiquitination [GO:0016567]; regulation of DNA-templated transcription [GO:0006355]; transcription by RNA polymerase II [GO:0006366]	chromatin [GO:0000785]; cytosol [GO:0005829]; nucleolus [GO:0005730]; nucleoplasm [GO:0005654]; nucleus [GO:0005634]; plasma membrane [GO:0005886]	DNA-binding transcription factor activity, RNA polymerase II-specific [GO:0000981]; DNA-binding transcription repressor activity, RNA polymerase II-specific [GO:0001227]; RNA binding [GO:0003723]; RNA polymerase II transcription regulatory region sequence-specific DNA binding [GO:0000977]; ubiquitin protein ligase activity [GO:0061630]; zinc ion binding [GO:0008270]	NFX1	Homo sapiens (Human)	1120	124395	SUBCELLULAR LOCATION: Nucleus.
N : R203M	Q13907	Q13907	7|8|14|9	38	9.5	4	0|0|0|0|3|2|1|2|0|1|0|0|2|0|2|2	1	1	1	1	1	4.86	10.13	0		TRUE	Q13907	IDI1	5	1.6	15	68	22.0588	TRUE	Q13907	IDI1_HUMAN	Isopentenyl-diphosphate Delta-isomerase 1 (EC 5.3.3.2) (Isopentenyl pyrophosphate isomerase 1) (IPP isomerase 1) (IPPI1)	cholesterol biosynthetic process [GO:0006695]; dimethylallyl diphosphate biosynthetic process [GO:0050992]; isopentenyl diphosphate biosynthetic process [GO:0009240]; isoprenoid biosynthetic process [GO:0008299]	cytoplasm [GO:0005737]; cytosol [GO:0005829]; peroxisome [GO:0005777]	isopentenyl-diphosphate delta-isomerase activity [GO:0004452]; magnesium ion binding [GO:0000287]; manganese ion binding [GO:0030145]; metal ion binding [GO:0046872]	IDI1	Homo sapiens (Human)	227	26319	SUBCELLULAR LOCATION: Peroxisome {ECO:0000250|UniProtKB:O35586}.
N : R203M	Q147X3	Q147X3	10|13|14|10	47	11.75	4	1|0|1|0|0|0|0|0|0|0|2|1|11|8|0|2	0.9	0.94	0.9	0.94	0.9	1.86	7.23	0.02		TRUE	Q147X3	NAA30	11	3.53571	28	68	41.1765	TRUE	Q147X3	NAA30_HUMAN	N-alpha-acetyltransferase 30 (EC 2.3.1.256) (N-acetyltransferase 12) (N-acetyltransferase MAK3 homolog) (NatC catalytic subunit)	N-terminal peptidyl-methionine acetylation [GO:0017196]	cytoplasm [GO:0005737]; cytosol [GO:0005829]; NatC complex [GO:0031417]; nucleus [GO:0005634]	peptide alpha-N-acetyltransferase activity [GO:0004596]	NAA30	Homo sapiens (Human)	362	39320	SUBCELLULAR LOCATION: Cytoplasm {ECO:0000269|PubMed:19398576, ECO:0000269|PubMed:25732826}. Nucleus {ECO:0000269|PubMed:25732826}.
N : R203M	Q15032	Q15032	16|18|13|14	61	15.25	4	0|2|0|0|0|0|0|0|0|2|1|3|0|0|0|0	1	1	1	1	1	8.6	30.5	0		TRUE	Q15032	R3HDM1	3	1.66667	15	68	22.0588	TRUE	Q15032	R3HD1_HUMAN	R3H domain-containing protein 1			RNA binding [GO:0003723]	R3HDM1	Homo sapiens (Human)	1099	120696
N : R203M	Q15036	Q15036	4|7|5|4	20	5	4	0|0|0|0|0|0|0|0|0|0|0|0|1|0|0|0	1	1	1	1	1	6.57	50	0		TRUE	Q15036	SNX17	4	1.58333	24	68	35.2941	TRUE	Q15036	SNX17_HUMAN	Sorting nexin-17	aorta development [GO:0035904]; cardiac septum development [GO:0003279]; cholesterol catabolic process [GO:0006707]; coronary vasculature development [GO:0060976]; endocytic recycling [GO:0032456]; endosomal transport [GO:0016197]; intracellular protein transport [GO:0006886]; kidney development [GO:0001822]; receptor-mediated endocytosis [GO:0006898]; regulation of endocytosis [GO:0030100]; sign…	cytoplasmic vesicle [GO:0031410]; cytosol [GO:0005829]; early endosome [GO:0005769]; endosome [GO:0005768]; endosome membrane [GO:0010008]; Golgi apparatus [GO:0005794]; intracellular membrane-bounded organelle [GO:0043231]; membrane [GO:0016020]; protein-containing complex [GO:0032991]	low-density lipoprotein particle receptor binding [GO:0050750]; phosphatidylinositol binding [GO:0035091]; protein C-terminus binding [GO:0008022]; signaling receptor binding [GO:0005102]	SNX17	Homo sapiens (Human)	470	52901	SUBCELLULAR LOCATION: Cytoplasm {ECO:0000269|PubMed:11237770, ECO:0000269|PubMed:21512128}. Early endosome {ECO:0000269|PubMed:14739284, ECO:0000269|PubMed:15121882, ECO:0000269|PubMed:15769472, ECO:0000269|PubMed:21512128, ECO:0000269|PubMed:28892079}. Cytoplasmic vesicle membrane {ECO:0000269|PubMed:11237770, ECO:0000269|PubMed:16712798}; Peripheral membrane protein {ECO:0000269|PubMed:11237770…
N : R203M	Q16254	Q16254	2|4|2|3	11	2.75	4	0|0|0|0|0|0|0|0|0|0|0|0|0|0|0|0	0.97	1	0.97	1	0.97	2.98	27.5	0		TRUE	Q16254	E2F4	1	1	7	68	10.2941	TRUE	Q16254	E2F4_HUMAN	Transcription factor E2F4 (E2F-4)	animal organ morphogenesis [GO:0009887]; blood circulation [GO:0008015]; cell volume homeostasis [GO:0006884]; centriole assembly [GO:0098534]; epithelial cell development [GO:0002064]; motile cilium assembly [GO:0044458]; multi-ciliated epithelial cell differentiation [GO:1903251]; positive regulation of transcription by RNA polymerase II [GO:0045944]; regulation of cell population proliferation…	chromatin [GO:0000785]; cytoplasm [GO:0005737]; nucleoplasm [GO:0005654]; RNA polymerase II transcription regulator complex [GO:0090575]	DNA binding [GO:0003677]; DNA-binding transcription activator activity [GO:0001216]; DNA-binding transcription activator activity, RNA polymerase II-specific [GO:0001228]; DNA-binding transcription factor activity [GO:0003700]; DNA-binding transcription factor activity, RNA polymerase II-specific [GO:0000981]; promoter-specific chromatin binding [GO:1990841]; protein dimerization activity [GO:004…	E2F4	Homo sapiens (Human)	413	43960	SUBCELLULAR LOCATION: Nucleus.
N : R203M	Q17RS7	Q17RS7	10|5|8|4	27	6.75	4	2|1|2|0|0|0|0|0|0|1|3|2|1|3|0|0	0.89	1	0.89	1	0.89	0.86	7.2	0.02		TRUE	Q17RS7	GEN1	3	1.47826	23	68	33.8235	TRUE	Q17RS7	GEN_HUMAN	Flap endonuclease GEN homolog 1 (EC 3.1.-.-)	double-strand break repair via homologous recombination [GO:0000724]; positive regulation of mitotic cell cycle spindle assembly checkpoint [GO:0090267]; regulation of centrosome duplication [GO:0010824]; replication fork processing [GO:0031297]; resolution of mitotic recombination intermediates [GO:0071140]; resolution of recombination intermediates [GO:0071139]	centrosome [GO:0005813]; nucleoplasm [GO:0005654]	5'-flap endonuclease activity [GO:0017108]; crossover junction endodeoxyribonuclease activity [GO:0008821]; four-way junction DNA binding [GO:0000400]; magnesium ion binding [GO:0000287]; protein homodimerization activity [GO:0042803]	GEN1	Homo sapiens (Human)	908	102884	SUBCELLULAR LOCATION: Nucleus {ECO:0000305|PubMed:26578604, ECO:0000305|PubMed:28049850}.
N : R203M	Q3BBV0	Q3BBV0	8|8|8|5	29	7.25	4	0|0|0|0|0|0|0|0|0|0|0|0|0|0|0|0	1	1	1	1	1	8.25	72.5	0		TRUE	Q3BBV0	NBPF1	1	1	1	68	1.47059	TRUE	Q3BBV0	NBPF1_HUMAN	Neuroblastoma breakpoint family member 1		cytoplasm [GO:0005737]		NBPF1	Homo sapiens (Human)	1214	139258	SUBCELLULAR LOCATION: Cytoplasm {ECO:0000269|PubMed:16079250}.
N : R203M	Q53GS7	Q53GS7	9|11|8|11	39	9.75	4	0|0|0|0|0|0|0|0|0|1|0|2|0|2|0|0	1	1	1	1	1	7.05	31.2	0		TRUE	Q53GS7	GLE1	2	1.54545	11	68	16.1765	TRUE	Q53GS7	GLE1_HUMAN	mRNA export factor GLE1 (hGLE1) (GLE1 RNA export mediator) (GLE1-like protein) (Nucleoporin GLE1)	mRNA export from nucleus [GO:0006406]; nucleocytoplasmic transport [GO:0006913]; poly(A)+ mRNA export from nucleus [GO:0016973]; protein transport [GO:0015031]; regulation of translational initiation [GO:0006446]; regulation of translational termination [GO:0006449]	centriole [GO:0005814]; centrosome [GO:0005813]; ciliary basal body [GO:0036064]; cytoplasm [GO:0005737]; cytosol [GO:0005829]; extracellular space [GO:0005615]; membrane [GO:0016020]; nuclear envelope [GO:0005635]; nuclear membrane [GO:0031965]; nuclear pore [GO:0005643]; nuclear pore cytoplasmic filaments [GO:0044614]; nucleolus [GO:0005730]	identical protein binding [GO:0042802]; inositol hexakisphosphate binding [GO:0000822]; phospholipid binding [GO:0005543]; translation initiation factor binding [GO:0031369]	GLE1	Homo sapiens (Human)	698	79836	SUBCELLULAR LOCATION: Nucleus {ECO:0000269|PubMed:12668658}. Cytoplasm {ECO:0000269|PubMed:12668658}. Note=Shuttles between the nucleus and the cytoplasm (PubMed:12668658). Shuttling is essential for its mRNA export function (PubMed:12668658). {ECO:0000269|PubMed:12668658}.; SUBCELLULAR LOCATION: [Isoform 1]: Cytoplasm {ECO:0000269|PubMed:12668658}. Nucleus, nuclear pore complex {ECO:0000269|PubM…
N : R203M	Q5TAX3	Q5TAX3	22|13|20|18	73	18.25	4	3|1|3|0|0|0|0|0|0|2|1|0|3|3|0|0	1	1	1	1	1	7.38	18.25	0		TRUE	Q5TAX3	TUT4	4	1.68	25	68	36.7647	TRUE	Q5TAX3	TUT4_HUMAN	Terminal uridylyltransferase 4 (TUTase 4) (EC 2.7.7.52) (Zinc finger CCHC domain-containing protein 11)	miRNA catabolic process [GO:0010587]; miRNA metabolic process [GO:0010586]; negative regulation of transposition, RNA-mediated [GO:0010526]; nuclear-transcribed mRNA poly(A) tail shortening [GO:0000289]; oocyte maturation [GO:0001556]; polyuridylation-dependent mRNA catabolic process [GO:1990074]; pre-miRNA processing [GO:0031054]; RNA 3' uridylation [GO:0071076]; RNA 3'-end processing [GO:003112…	cytoplasm [GO:0005737]; cytoplasmic ribonucleoprotein granule [GO:0036464]; cytosol [GO:0005829]; extracellular exosome [GO:0070062]; extracellular space [GO:0005615]; nucleolus [GO:0005730]	miRNA binding [GO:0035198]; nucleotidyltransferase activity [GO:0016779]; RNA binding [GO:0003723]; RNA uridylyltransferase activity [GO:0050265]; zinc ion binding [GO:0008270]	TUT4	Homo sapiens (Human)	1644	185166	SUBCELLULAR LOCATION: Nucleus {ECO:0000269|PubMed:16643855}. Cytoplasm {ECO:0000269|PubMed:16643855, ECO:0000269|PubMed:19703396, ECO:0000269|PubMed:25480299}. Cytoplasm, Cytoplasmic ribonucleoprotein granule {ECO:0000269|PubMed:30122351}. Note=Mainly cytoplasmic (PubMed:19703396, PubMed:25480299). Translocates into the cytoplasm following treatment of the cell with LPS (PubMed:16643855). Co-enri…
N : R203M	Q5VSY0	Q5VSY0	10|11|6|7	34	8.5	4	0|0|0|0|0|0|0|0|0|0|0|0|0|0|1|1	1	1	1	1	1	9.41	68	0		TRUE	Q5VSY0	GKAP1	3	1.375	8	68	11.7647	TRUE	Q5VSY0	GKAP1_HUMAN	G kinase-anchoring protein 1 (cGMP-dependent protein kinase-anchoring protein of 42 kDa)	positive regulation of insulin receptor signaling pathway [GO:0046628]; signal transduction [GO:0007165]	Golgi apparatus [GO:0005794]	identical protein binding [GO:0042802]	GKAP1	Homo sapiens (Human)	366	42078	SUBCELLULAR LOCATION: Golgi apparatus {ECO:0000250|UniProtKB:Q9JMB0}.
N : R203M	Q5VYS8	Q5VYS8	20|18|14|13	65	16.25	4	0|0|2|0|0|0|0|0|0|0|0|0|4|3|0|0	1	1	1	1	1	5.87	28.89	0		TRUE	Q5VYS8	TUT7	4	2.25926	27	68	39.7059	TRUE	Q5VYS8	TUT7_HUMAN	Terminal uridylyltransferase 7 (TUTase 7) (EC 2.7.7.52) (Zinc finger CCHC domain-containing protein 6)	miRNA metabolic process [GO:0010586]; negative regulation of transposition, RNA-mediated [GO:0010526]; nuclear-transcribed mRNA poly(A) tail shortening [GO:0000289]; oocyte maturation [GO:0001556]; polyuridylation-dependent mRNA catabolic process [GO:1990074]; pre-miRNA processing [GO:0031054]; RNA 3' uridylation [GO:0071076]; RNA 3'-end processing [GO:0031123]	cytoplasm [GO:0005737]; cytosol [GO:0005829]; nucleoplasm [GO:0005654]	miRNA binding [GO:0035198]; nucleotidyltransferase activity [GO:0016779]; RNA binding [GO:0003723]; RNA uridylyltransferase activity [GO:0050265]; uridylyltransferase activity [GO:0070569]; zinc ion binding [GO:0008270]	TUT7	Homo sapiens (Human)	1495	171229	SUBCELLULAR LOCATION: Cytoplasm {ECO:0000269|PubMed:25480299, ECO:0000269|PubMed:30122351}. Note=Expression is pancytoplasmic in contrast with TUT4 expression which is enriched in cytoplasmic ribonucleoprotein granules. {ECO:0000269|PubMed:30122351}.
N : R203M	Q5VZE5	Q5VZE5	13|12|7|11	43	10.75	4	4|3|0|0|0|0|0|0|0|2|2|5|6|5|2|2	0.88	0.98	0.88	0.98	0.88	0.63	5.55	0.02		TRUE	Q5VZE5	NAA35	7	3.12	25	68	36.7647	TRUE	Q5VZE5	NAA35_HUMAN	N-alpha-acetyltransferase 35, NatC auxiliary subunit (Embryonic growth-associated protein homolog) (Protein MAK10 homolog)	N-terminal peptidyl-methionine acetylation [GO:0017196]; N-terminal protein amino acid acetylation [GO:0006474]; negative regulation of apoptotic process [GO:0043066]; smooth muscle cell proliferation [GO:0048659]	cytoplasm [GO:0005737]; cytosol [GO:0005829]; NatC complex [GO:0031417]; nucleoplasm [GO:0005654]; plasma membrane [GO:0005886]		NAA35	Homo sapiens (Human)	725	83639	SUBCELLULAR LOCATION: Cytoplasm {ECO:0000269|PubMed:19398576}.
N : R203M	Q659C4	Q659C4	18|19|17|15	69	17.25	4	1|1|2|0|0|0|0|0|0|3|1|2|4|3|2|5	1	1	1	1	1	7.75	11.5	0		TRUE	Q659C4	LARP1B	7	2.57576	33	68	48.5294	TRUE	Q659C4	LAR1B_HUMAN	La-related protein 1B (La ribonucleoprotein domain family member 1B) (La ribonucleoprotein domain family member 2) (La-related protein 2)	positive regulation of translation [GO:0045727]	cytoplasmic stress granule [GO:0010494]; cytosol [GO:0005829]; nucleus [GO:0005634]	RNA binding [GO:0003723]	LARP1B	Homo sapiens (Human)	914	105322
N : R203M	Q6NZI2	Q6NZI2	4|4|5|3	16	4	4	0|0|0|0|0|0|0|0|0|0|1|1|1|0|0|1	0.98	1	0.98	1	0.98	2.79	16	0		TRUE	Q6NZI2	CAVIN1	3	1.38462	13	68	19.1176	TRUE	Q6NZI2	CAVN1_HUMAN	Caveolae-associated protein 1 (Cavin-1) (Polymerase I and transcript release factor)	positive regulation of cell motility [GO:2000147]; protein secretion [GO:0009306]; rRNA transcription [GO:0009303]; termination of RNA polymerase I transcription [GO:0006363]; transcription initiation at RNA polymerase I promoter [GO:0006361]	caveola [GO:0005901]; cytoplasm [GO:0005737]; cytosol [GO:0005829]; endoplasmic reticulum [GO:0005783]; intracellular membrane-bounded organelle [GO:0043231]; membrane raft [GO:0045121]; mitochondrion [GO:0005739]; nucleoplasm [GO:0005654]; nucleus [GO:0005634]; plasma membrane [GO:0005886]; protein-containing complex [GO:0032991]	identical protein binding [GO:0042802]; RNA binding [GO:0003723]; rRNA primary transcript binding [GO:0042134]	CAVIN1	Homo sapiens (Human)	390	43476	SUBCELLULAR LOCATION: Membrane, caveola {ECO:0000269|PubMed:15242332, ECO:0000269|PubMed:18056712, ECO:0000269|PubMed:19525939}. Cell membrane {ECO:0000269|PubMed:15242332, ECO:0000269|PubMed:17026959, ECO:0000269|PubMed:18056712}. Microsome {ECO:0000269|PubMed:15242332, ECO:0000269|PubMed:17026959}. Endoplasmic reticulum {ECO:0000250|UniProtKB:P85125}. Cytoplasm, cytosol {ECO:0000269|PubMed:1524…
N : R203M	Q6P1Q9	Q6P1Q9	3|3|4|5	15	3.75	4	0|0|0|0|0|0|0|0|0|0|0|1|0|0|0|0	1	1	1	1	1	4.83	37.5	0		TRUE	Q6P1Q9	METTL2B	4	1.5	12	68	17.6471	TRUE	Q6P1Q9	MET2B_HUMAN	tRNA N(3)-methylcytidine methyltransferase METTL2B (EC 2.1.1.-) (Methyltransferase-like protein 2B)	tRNA methylation [GO:0030488]	cytoplasm [GO:0005737]	tRNA (cytosine) methyltransferase activity [GO:0016427]; tRNA (cytosine-3-)-methyltransferase activity [GO:0052735]	METTL2B	Homo sapiens (Human)	378	43426	SUBCELLULAR LOCATION: Cytoplasm {ECO:0000269|PubMed:34268557}.
N : R203M	Q6ZTW0	Q6ZTW0	2|3|4|4	13	3.25	4	0|0|0|0|0|0|0|0|0|0|0|0|0|0|3|6	0.75	0.83	0.75	0.83	0.75	0.4	5.78	0.04		TRUE	Q6ZTW0	TPGS1	21	6.77778	9	68	13.2353	TRUE	Q6ZTW0	TPGS1_HUMAN	Tubulin polyglutamylase complex subunit 1 (PGs1)	adult behavior [GO:0030534]; chemical synaptic transmission [GO:0007268]; protein polyglutamylation [GO:0018095]; sperm axoneme assembly [GO:0007288]; vesicle localization [GO:0051648]	axon [GO:0030424]; centrosome [GO:0005813]; cytoplasm [GO:0005737]; dendrite [GO:0030425]; microtubule [GO:0005874]; motile cilium [GO:0031514]; synapse [GO:0045202]	microtubule binding [GO:0008017]; tubulin-glutamic acid ligase activity [GO:0070740]	TPGS1	Homo sapiens (Human)	290	31275	SUBCELLULAR LOCATION: Cytoplasm, cytoskeleton, cilium axoneme {ECO:0000250|UniProtKB:Q99MS8}. Cytoplasm, cytoskeleton, flagellum axoneme {ECO:0000250|UniProtKB:Q99MS8}. Cytoplasm, cytoskeleton, cilium basal body {ECO:0000250|UniProtKB:Q99MS8}. Cytoplasm, cytoskeleton, flagellum basal body {ECO:0000250|UniProtKB:Q99MS8}. Cell projection, axon {ECO:0000250|UniProtKB:Q99MS8}. Cell projection, dendri…
N : R203M	Q86TU7	Q86TU7	2|2|2|3	9	2.25	4	0|0|0|0|0|0|0|0|0|0|0|0|0|0|0|0	0.96	0.99	0.96	0.99	0.96	2.98	22.5	0.01		TRUE	Q86TU7	SETD3	1	1	4	68	5.88235	TRUE	Q86TU7	SETD3_HUMAN	Actin-histidine N-methyltransferase (EC 2.1.1.85) (Protein-L-histidine N-tele-methyltransferase) (SET domain-containing protein 3) (hSETD3)	actin modification [GO:0030047]; peptidyl-histidine methylation [GO:0018021]; peptidyl-lysine dimethylation [GO:0018027]; peptidyl-lysine monomethylation [GO:0018026]; positive regulation of DNA-templated transcription [GO:0045893]; positive regulation of muscle cell differentiation [GO:0051149]; positive regulation of transcription by RNA polymerase II [GO:0045944]; regulation of uterine smooth …	chromatin [GO:0000785]; cytoplasm [GO:0005737]; nucleoplasm [GO:0005654]	actin binding [GO:0003779]; histone H3K36 methyltransferase activity [GO:0046975]; histone H3K4 methyltransferase activity [GO:0042800]; protein-L-histidine N-tele-methyltransferase activity [GO:0018064]; RNA polymerase II-specific DNA-binding transcription factor binding [GO:0061629]; transcription coactivator activity [GO:0003713]	SETD3	Homo sapiens (Human)	594	67257	SUBCELLULAR LOCATION: Cytoplasm {ECO:0000269|PubMed:28442573, ECO:0000269|PubMed:30626964}. Nucleus {ECO:0000269|PubMed:28442573}. Note=Localizes mainly in the cytoplasm. {ECO:0000269|PubMed:28442573}.
N : R203M	Q86US8	Q86US8	10|10|6|9	35	8.75	4	1|1|1|1|0|0|0|0|1|2|1|1|0|0|0|0	1	1	1	1	1	5.17	15.56	0		TRUE	Q86US8	SMG6	1	1	4	68	5.88235	TRUE	Q86US8	EST1A_HUMAN	Telomerase-binding protein EST1A (EC 3.1.-.-) (Ever shorter telomeres 1A) (hEST1A) (Nonsense mediated mRNA decay factor SMG6) (Smg-6 homolog) (hSmg5/7a)	mRNA export from nucleus [GO:0006406]; negative regulation of telomere capping [GO:1904354]; nuclear-transcribed mRNA catabolic process, nonsense-mediated decay [GO:0000184]; regulation of dephosphorylation [GO:0035303]; regulation of telomerase activity [GO:0051972]; regulation of telomere maintenance [GO:0032204]; regulation of telomere maintenance via telomerase [GO:0032210]	chromosome, telomeric region [GO:0000781]; cytoplasm [GO:0005737]; cytosol [GO:0005829]; nucleolus [GO:0005730]; nucleus [GO:0005634]; telomerase holoenzyme complex [GO:0005697]	DNA polymerase binding [GO:0070182]; endoribonuclease activity [GO:0004521]; metal ion binding [GO:0046872]; ribonucleoprotein complex binding [GO:0043021]; RNA binding [GO:0003723]; telomerase RNA binding [GO:0070034]; telomeric DNA binding [GO:0042162]	SMG6	Homo sapiens (Human)	1419	160462	SUBCELLULAR LOCATION: Nucleus, nucleolus {ECO:0000269|PubMed:12676087}. Chromosome, telomere {ECO:0000305|PubMed:12699629}. Cytoplasm, cytosol {ECO:0000269|PubMed:12676087}. Note=Particularly enriched in the nucleolus. {ECO:0000269|PubMed:12676087}.
N : R203M	Q86XP1	Q86XP1	8|11|9|10	38	9.5	4	4|2|3|0|0|0|0|0|0|3|5|3|6|5|3|3	0.83	0.94	0.83	0.94	0.83	0.74	4.11	0.03		TRUE	Q86XP1	DGKH	6	3.12121	33	68	48.5294	TRUE	Q86XP1	DGKH_HUMAN	Diacylglycerol kinase eta (DAG kinase eta) (EC 2.7.1.107) (Diglyceride kinase eta) (DGK-eta)	diacylglycerol metabolic process [GO:0046339]; intracellular signal transduction [GO:0035556]; lipid phosphorylation [GO:0046834]; negative regulation of catalytic activity [GO:0043086]; phosphatidic acid biosynthetic process [GO:0006654]; phosphatidic acid metabolic process [GO:0046473]; platelet activation [GO:0030168]; protein kinase C-activating G protein-coupled receptor signaling pathway [G…	actin cytoskeleton [GO:0015629]; cytoplasm [GO:0005737]; endosome [GO:0005768]; intracellular membrane-bounded organelle [GO:0043231]; plasma membrane [GO:0005886]; protein-containing complex [GO:0032991]	ATP binding [GO:0005524]; diacylglycerol kinase activity [GO:0004143]; identical protein binding [GO:0042802]; kinase binding [GO:0019900]; metal ion binding [GO:0046872]; SAM domain binding [GO:0032093]	DGKH	Homo sapiens (Human)	1220	134866	SUBCELLULAR LOCATION: Cytoplasm {ECO:0000269|PubMed:12810723, ECO:0000269|PubMed:19710016}. Cell membrane {ECO:0000269|PubMed:12810723, ECO:0000269|PubMed:19710016}. Note=Translocated from the cytoplasm to endosomes in response to stress stimuli (PubMed:12810723). Isoform 2 is rapidly relocated back to the cytoplasm upon removal of stress stimuli, whereas isoform 1 exhibits sustained endosomal as…
N : R203M	Q8IU85	Q8IU85	5|4|4|5	18	4.5	4	0|0|0|0|0|0|0|0|0|0|0|0|1|2|0|0	0.99	0.99	0.99	0.99	0.99	4.11	24	0		TRUE	Q8IU85	CAMK1D	2	1.27273	11	68	16.1765	TRUE	Q8IU85	KCC1D_HUMAN	Calcium/calmodulin-dependent protein kinase type 1D (EC 2.7.11.17) (CaM kinase I delta) (CaM kinase ID) (CaM-KI delta) (CaMKI delta) (CaMKID) (CaMKI-like protein kinase) (CKLiK)	inflammatory response [GO:0006954]; negative regulation of apoptotic process [GO:0043066]; nervous system development [GO:0007399]; peptidyl-serine phosphorylation [GO:0018105]; positive regulation of apoptotic process [GO:0043065]; positive regulation of CREB transcription factor activity [GO:0032793]; positive regulation of neuron projection development [GO:0010976]; positive regulation of neut…	cytoplasm [GO:0005737]; nucleus [GO:0005634]	ATP binding [GO:0005524]; calmodulin binding [GO:0005516]; calmodulin-dependent protein kinase activity [GO:0004683]; protein serine kinase activity [GO:0106310]	CAMK1D	Homo sapiens (Human)	385	42914	SUBCELLULAR LOCATION: Cytoplasm {ECO:0000305}. Nucleus {ECO:0000305}. Note=Predominantly cytoplasmic. Nuclear localization increases upon activation by KCl treatment in hippocampal neurons.
N : R203M	Q8IUZ0	Q8IUZ0	9|6|5|5	25	6.25	4	0|0|0|0|0|0|0|0|0|0|0|0|0|0|8|6	0.85	0.93	0.85	0.93	0.85	1.43	7.14	0.02		TRUE	Q8IUZ0	LRRC49	40	12.3333	9	68	13.2353	TRUE	Q8IUZ0	LRC49_HUMAN	Leucine-rich repeat-containing protein 49 (Centriolar satellite-associated tubulin polyglutamylase complex regulator 2) (Tubulin polyglutamylase complex subunit 4) (PGs4)	outer dynein arm assembly [GO:0036158]	centriolar satellite [GO:0034451]; cytoplasm [GO:0005737]; microtubule [GO:0005874]		LRRC49	Homo sapiens (Human)	686	78894	SUBCELLULAR LOCATION: Cytoplasm, cytoskeleton {ECO:0000269|PubMed:34782749}. Cytoplasm, cytoskeleton, microtubule organizing center, centrosome, centriolar satellite {ECO:0000269|PubMed:34782749}. Note=Associated with microtubules. {ECO:0000269|PubMed:34782749}.
N : R203M	Q8IWR0	Q8IWR0	2|4|5|4	15	3.75	4	0|0|0|0|0|0|0|0|0|0|0|0|0|0|0|0	0.99	1	0.99	1	0.99	2.98	37.5	0		TRUE	Q8IWR0	ZC3H7A	2	1.41667	12	68	17.6471	TRUE	Q8IWR0	Z3H7A_HUMAN	Zinc finger CCCH domain-containing protein 7A	miRNA processing [GO:0035196]; post-transcriptional regulation of gene expression [GO:0010608]	nucleus [GO:0005634]	metal ion binding [GO:0046872]; miRNA binding [GO:0035198]; RNA binding [GO:0003723]	ZC3H7A	Homo sapiens (Human)	971	110538	SUBCELLULAR LOCATION: Nucleus {ECO:0000305}.
N : R203M	Q8IWW6	Q8IWW6	3|3|6|6	18	4.5	4	0|0|0|0|0|0|0|0|0|0|0|0|0|0|2|2	0.95	0.99	0.95	0.99	0.95	2.2	18	0.01		TRUE	Q8IWW6	ARHGAP12	2	1.66667	9	68	13.2353	TRUE	Q8IWW6	RHG12_HUMAN	Rho GTPase-activating protein 12 (Rho-type GTPase-activating protein 12)	actin filament organization [GO:0007015]; morphogenesis of an epithelial sheet [GO:0002011]; negative regulation of small GTPase mediated signal transduction [GO:0051058]; phagocytosis, engulfment [GO:0006911]; regulation of GTPase activity [GO:0043087]; signal transduction [GO:0007165]	cytoplasm [GO:0005737]; phagocytic cup [GO:0001891]	GTPase activator activity [GO:0005096]	ARHGAP12	Homo sapiens (Human)	846	96254
N : R203M	Q8N0Z6	Q8N0Z6	2|2|4|2	10	2.5	4	0|0|0|0|0|0|0|0|0|0|0|0|0|0|0|0	0.96	1	0.96	1	0.96	2.98	25	0.01		TRUE								TRUE	Q8N0Z6	TTC5_HUMAN	Tetratricopeptide repeat protein 5 (TPR repeat protein 5) (Stress-responsive activator of p300) (Protein Strap)	cellular response to DNA damage stimulus [GO:0006974]; cellular response to starvation [GO:0009267]; DNA repair [GO:0006281]; positive regulation of mRNA catabolic process [GO:0061014]; positive regulation of transcription by RNA polymerase II [GO:0045944]	cytoplasmic vesicle [GO:0031410]; cytosol [GO:0005829]; mitochondrial matrix [GO:0005759]; mitochondrion [GO:0005739]; nucleoplasm [GO:0005654]	chromatin binding [GO:0003682]; DNA binding [GO:0003677]; ribosome binding [GO:0043022]	TTC5	Homo sapiens (Human)	440	48928	SUBCELLULAR LOCATION: Nucleus {ECO:0000250|UniProtKB:Q99LG4}. Cytoplasm {ECO:0000269|PubMed:31727855}. Cytoplasmic vesicle {ECO:0000250|UniProtKB:Q99LG4}. Mitochondrion matrix {ECO:0000250|UniProtKB:Q99LG4}. Note=Phosphorylation at Ser-203 results in nuclear localization, while unphosphorylated protein localizes to the cytoplasm. Nuclear localization may be necessary for DNA damage-dependent stab…
N : R203M	Q8N3J3	Q8N3J3	3|2|2|5	12	3	4	0|0|0|2|0|1|2|0|0|0|0|0|0|0|0|0	0.81	0.98	0.81	0.98	0.81	0.8	9.6	0.03		TRUE								TRUE	Q8N3J3	HROB_HUMAN	Homologous recombination OB-fold protein	cellular response to DNA damage stimulus [GO:0006974]; DNA synthesis involved in DNA repair [GO:0000731]; female gamete generation [GO:0007292]; interstrand cross-link repair [GO:0036297]; male gamete generation [GO:0048232]; recombinational repair [GO:0000725]	nucleus [GO:0005634]; site of DNA damage [GO:0090734]	single-stranded DNA binding [GO:0003697]	HROB	Homo sapiens (Human)	647	69771	SUBCELLULAR LOCATION: Nucleus {ECO:0000269|PubMed:31467087}. Chromosome {ECO:0000269|PubMed:31467087}. Note=Localized to the sites of DNA damage. {ECO:0000269|PubMed:31467087}.
N : R203M	Q8N6R0	Q8N6R0	12|13|11|8	44	11	4	1|0|1|1|2|1|1|2|2|2|2|1|1|1|0|0	1	1	1	1	1	5.18	9.78	0		TRUE	Q8N6R0	METTL13	8	1.95	20	68	29.4118	TRUE	Q8N6R0	EFNMT_HUMAN	eEF1A lysine and N-terminal methyltransferase (eEF1A-KNMT) (Methyltransferase-like protein 13) [Includes: eEF1A lysine methyltransferase (EC 2.1.1.-); eEF1A N-terminal methyltransferase (EC 2.1.1.-)]	methylation [GO:0032259]; negative regulation of cell cycle G1/S phase transition [GO:1902807]; negative regulation of transcription by RNA polymerase II [GO:0000122]	cytoplasm [GO:0005737]; mitochondrion [GO:0005739]; nucleus [GO:0005634]	methyltransferase activity [GO:0008168]	METTL13	Homo sapiens (Human)	699	78768	SUBCELLULAR LOCATION: Cytoplasm {ECO:0000269|PubMed:27659353}. Nucleus {ECO:0000269|PubMed:27659353}. Mitochondrion {ECO:0000269|PubMed:27659353}.
N : R203M	Q8NHU6	Q8NHU6	15|16|10|11	52	13	4	0|0|1|0|0|0|0|0|0|0|1|0|1|0|0|0	1	1	1	1	1	14.61	69.33	0		TRUE	Q8NHU6	TDRD7	2	1.06667	15	68	22.0588	TRUE	Q8NHU6	TDRD7_HUMAN	Tudor domain-containing protein 7 (PCTAIRE2-binding protein) (Tudor repeat associator with PCTAIRE-2) (Trap)	lens fiber cell differentiation [GO:0070306]; lens morphogenesis in camera-type eye [GO:0002089]; P granule organization [GO:0030719]; piRNA processing [GO:0034587]; post-transcriptional regulation of gene expression [GO:0010608]; spermatogenesis [GO:0007283]	chromatoid body [GO:0033391]; cytoplasm [GO:0005737]; mitochondrial matrix [GO:0005759]; P granule [GO:0043186]; ribonucleoprotein granule [GO:0035770]	mRNA binding [GO:0003729]; protein N-terminus binding [GO:0047485]	TDRD7	Homo sapiens (Human)	1098	123586	SUBCELLULAR LOCATION: Cytoplasm {ECO:0000269|PubMed:21436445}. Note=Localizes to cytoplasmic RNA granules. Present in chromatoid body (CB) of spermatids (mammalian counterpart of germplasm, pole plasm or polar granules in Drosophila germ cells), also named processing bodies (P-bodies) in somatic cells. Detected in the multilobular cytoplasmic CBs (also called intermitochondrial cementin) in pachy…
N : R203M	Q8TBB5	Q8TBB5	7|10|8|8	33	8.25	4	2|2|2|1|1|2|1|1|0|2|3|2|1|1|4|2	0.96	1	0.96	1	0.96	2.25	4.89	0.01		TRUE	Q8TBB5	KLHDC4	4	1.89655	29	68	42.6471	TRUE	Q8TBB5	KLDC4_HUMAN	Kelch domain-containing protein 4				KLHDC4	Homo sapiens (Human)	520	57892
N : R203M	Q8TDB6	Q8TDB6	4|4|5|4	17	4.25	4	1|1|1|0|0|0|0|0|0|1|1|1|1|3|2|1	0.82	0.93	0.82	0.93	0.82	1.32	5.23	0.03		TRUE	Q8TDB6	DTX3L	3	1.33333	24	68	35.2941	TRUE	Q8TDB6	DTX3L_HUMAN	E3 ubiquitin-protein ligase DTX3L (EC 2.3.2.27) (B-lymphoma- and BAL-associated protein) (Protein deltex-3-like) (RING-type E3 ubiquitin transferase DTX3L) (Rhysin-2) (Rhysin2)	cellular response to DNA damage stimulus [GO:0006974]; chromatin organization [GO:0006325]; defense response to virus [GO:0051607]; DNA damage checkpoint signaling [GO:0000077]; double-strand break repair [GO:0006302]; endosome to lysosome transport [GO:0008333]; histone H2A ubiquitination [GO:0033522]; histone H2B ubiquitination [GO:0033523]; histone monoubiquitination [GO:0010390]; innate immun…	cytoplasm [GO:0005737]; cytosol [GO:0005829]; early endosome membrane [GO:0031901]; lysosomal membrane [GO:0005765]; lysosome [GO:0005764]; nucleoplasm [GO:0005654]; nucleus [GO:0005634]; protein-containing complex [GO:0032991]	enzyme binding [GO:0019899]; enzyme inhibitor activity [GO:0004857]; histone binding [GO:0042393]; metal ion binding [GO:0046872]; protein ADP-ribosyltransferase-substrate adaptor activity [GO:0140768]; STAT family protein binding [GO:0097677]; ubiquitin protein ligase activity [GO:0061630]; ubiquitin-like protein ligase binding [GO:0044389]; ubiquitin-protein transferase activity [GO:0004842]	DTX3L	Homo sapiens (Human)	740	83554	SUBCELLULAR LOCATION: Cytoplasm {ECO:0000269|PubMed:23230272, ECO:0000269|PubMed:24790097, ECO:0000269|PubMed:26479788}. Nucleus {ECO:0000269|PubMed:23230272, ECO:0000269|PubMed:26479788}. Early endosome membrane {ECO:0000269|PubMed:24790097}; Peripheral membrane protein {ECO:0000305|PubMed:24790097}; Cytoplasmic side {ECO:0000305|PubMed:24790097}. Lysosome membrane {ECO:0000269|PubMed:24790097};…
N : R203M	Q8WU79	Q8WU79	7|8|6|6	27	6.75	4	0|2|0|0|0|0|0|0|0|0|0|0|1|1|1|0	1	1	1	1	1	7.82	21.6	0		TRUE	Q8WU79	SMAP2	5	1.66667	27	68	39.7059	TRUE	Q8WU79	SMAP2_HUMAN	Stromal membrane-associated protein 2 (Stromal membrane-associated protein 1-like)		cytosol [GO:0005829]; nucleoplasm [GO:0005654]	GTPase activator activity [GO:0005096]; metal ion binding [GO:0046872]	SMAP2	Homo sapiens (Human)	429	46786	SUBCELLULAR LOCATION: Cytoplasm. Note=Detected in multiple foci throughout the cytoplasm and in juxtanuclear structures. {ECO:0000250}.
N : R203M	Q92530	Q92530	2|2|3|3	10	2.5	4	0|0|0|0|0|0|0|0|0|0|0|0|0|0|0|0	0.97	0.99	0.97	0.99	0.97	2.98	25	0.01		TRUE	Q92530	PSMF1	3	1.3	10	68	14.7059	TRUE	Q92530	PSMF1_HUMAN	Proteasome inhibitor PI31 subunit (hPI31)	negative regulation of proteasomal protein catabolic process [GO:1901799]; proteasome-mediated ubiquitin-dependent protein catabolic process [GO:0043161]; ubiquitin-dependent protein catabolic process [GO:0006511]	cytosol [GO:0005829]; endoplasmic reticulum [GO:0005783]; membrane [GO:0016020]; nucleoplasm [GO:0005654]; perinuclear region of cytoplasm [GO:0048471]; proteasome core complex [GO:0005839]	endopeptidase inhibitor activity [GO:0004866]; proteasome binding [GO:0070628]; protein heterodimerization activity [GO:0046982]; protein homodimerization activity [GO:0042803]	PSMF1	Homo sapiens (Human)	271	29817	SUBCELLULAR LOCATION: Cytoplasm {ECO:0000269|PubMed:18495667}. Endoplasmic reticulum {ECO:0000269|PubMed:18495667}.
N : R203M	Q93073	Q93073	5|4|4|7	20	5	4	0|0|0|0|0|0|0|0|0|0|0|0|0|0|0|0	1	1	1	1	1	6.57	50	0		TRUE								TRUE	Q93073	SBP2L_HUMAN	Selenocysteine insertion sequence-binding protein 2-like (SECIS-binding protein 2-like)	selenocysteine incorporation [GO:0001514]	ribonucleoprotein complex [GO:1990904]	mRNA 3'-UTR binding [GO:0003730]; ribonucleoprotein complex binding [GO:0043021]; RNA binding [GO:0003723]; selenocysteine insertion sequence binding [GO:0035368]	SECISBP2L	Homo sapiens (Human)	1101	121776
N : R203M	Q96BM9	Q96BM9	6|6|5|6	23	5.75	4	0|0|0|0|0|0|0|0|0|0|0|0|0|0|0|0	1	1	1	1	1	8.25	57.5	0		TRUE	Q96BM9	ARL8A	2	1.09524	21	68	30.8824	TRUE	Q96BM9	ARL8A_HUMAN	ADP-ribosylation factor-like protein 8A (ADP-ribosylation factor-like protein 10B) (Novel small G protein indispensable for equal chromosome segregation 2)	anterograde axonal transport [GO:0008089]; cell cycle [GO:0007049]; cell division [GO:0051301]; chromosome segregation [GO:0007059]; protein transport [GO:0015031]	axon cytoplasm [GO:1904115]; azurophil granule membrane [GO:0035577]; cytoplasm [GO:0005737]; extracellular exosome [GO:0070062]; ficolin-1-rich granule membrane [GO:0101003]; late endosome membrane [GO:0031902]; lysosomal membrane [GO:0005765]; membrane [GO:0016020]; midbody [GO:0030496]; plasma membrane [GO:0005886]; spindle midzone [GO:0051233]; synapse [GO:0045202]	alpha-tubulin binding [GO:0043014]; beta-tubulin binding [GO:0048487]; GTP binding [GO:0005525]; GTPase activity [GO:0003924]	ARL8A	Homo sapiens (Human)	186	21416	SUBCELLULAR LOCATION: Late endosome membrane {ECO:0000250|UniProtKB:Q9NVJ2}. Lysosome membrane {ECO:0000250|UniProtKB:Q9CQW2}. Cytoplasm, cytoskeleton, spindle {ECO:0000250|UniProtKB:Q9NVJ2}. Cell projection, axon {ECO:0000250|UniProtKB:Q9CQW2}. Synapse {ECO:0000250|UniProtKB:Q9CQW2}. Note=Localizes with microtubules at the spindle mid-zone during mitosis. {ECO:0000250|UniProtKB:Q9NVJ2}.
N : R203M	Q96D46	Q96D46	5|4|4|3	16	4	4	0|0|0|0|0|0|0|0|0|0|1|0|0|0|0|0	1	1	1	1	1	4.83	40	0		TRUE	Q96D46	NMD3	3	1.3	10	68	14.7059	TRUE	Q96D46	NMD3_HUMAN	60S ribosomal export protein NMD3 (hNMD3)	positive regulation of protein binding [GO:0032092]; positive regulation of protein localization to nucleolus [GO:1904751]; positive regulation of RNA biosynthetic process [GO:1902680]; protein transport [GO:0015031]; ribosomal large subunit export from nucleus [GO:0000055]	cytoplasm [GO:0005737]; membrane [GO:0016020]; nucleolus [GO:0005730]; nucleoplasm [GO:0005654]; nucleus [GO:0005634]	protein-macromolecule adaptor activity [GO:0030674]; ribosomal large subunit binding [GO:0043023]; RNA binding [GO:0003723]	NMD3	Homo sapiens (Human)	503	57603	SUBCELLULAR LOCATION: Cytoplasm {ECO:0000269|PubMed:12724356, ECO:0000269|PubMed:12773398}. Nucleus {ECO:0000269|PubMed:12724356, ECO:0000269|PubMed:12773398}. Note=Shuttles between the nucleus/nucleolus and the cytoplasm in a XPO1/CRM1-dependent manner. {ECO:0000269|PubMed:12724356, ECO:0000269|PubMed:12773398}.
N : R203M	Q96I15	Q96I15	3|2|2|2	9	2.25	4	0|0|0|0|0|0|0|0|0|0|0|0|0|1|0|0	0.96	0.99	0.96	0.99	0.96	2.98	22.5	0.01		TRUE								TRUE	Q96I15	SCLY_HUMAN	Selenocysteine lyase (hSCL) (EC 4.4.1.16)	amino acid metabolic process [GO:0006520]; selenocysteine catabolic process [GO:0016261]	catalytic complex [GO:1902494]; cytosol [GO:0005829]; Golgi apparatus [GO:0005794]	amino acid binding [GO:0016597]; protein homodimerization activity [GO:0042803]; selenocysteine lyase activity [GO:0009000]; transferase activity [GO:0016740]; vitamin B6 binding [GO:0070279]	SCLY	Homo sapiens (Human)	445	48149	SUBCELLULAR LOCATION: Cytoplasm, cytosol {ECO:0000250|UniProtKB:Q9JLI6}.
N : R203M	Q96KP4	Q96KP4	14|7|11|11	43	10.75	4	3|2|3|1|0|0|1|1|1|3|4|5|4|2|0|5	0.91	1	0.91	1	0.91	0.6	4.91	0.02		TRUE	Q96KP4	CNDP2	14	3.16129	31	68	45.5882	TRUE	Q96KP4	CNDP2_HUMAN	Cytosolic non-specific dipeptidase (EC 3.4.13.18) (CNDP dipeptidase 2) (Glutamate carboxypeptidase-like protein 1) (Peptidase A) (Threonyl dipeptidase)	proteolysis [GO:0006508]	cytosol [GO:0005829]; extracellular exosome [GO:0070062]; nucleoplasm [GO:0005654]	alanylglutamate dipeptidase activity [GO:0103046]; carboxypeptidase activity [GO:0004180]; dipeptidase activity [GO:0016805]; metal ion binding [GO:0046872]; metallodipeptidase activity [GO:0070573]; peptidase activity [GO:0008233]	CNDP2	Homo sapiens (Human)	475	52878	SUBCELLULAR LOCATION: Cytoplasm {ECO:0000269|PubMed:12473676, ECO:0000269|PubMed:17121880}.
N : R203M	Q96T21	Q96T21	14|11|15|10	50	12.5	4	1|1|2|0|0|1|0|0|0|4|2|3|2|2|3|2	1	1	1	1	1	7.81	8.7	0		TRUE	Q96T21	SECISBP2	3	1.62069	29	68	42.6471	TRUE	Q96T21	SEBP2_HUMAN	Selenocysteine insertion sequence-binding protein 2 (SECIS-binding protein 2)	forebrain neuron development [GO:0021884]; negative regulation of nuclear-transcribed mRNA catabolic process, nonsense-mediated decay [GO:2000623]; selenocysteine incorporation [GO:0001514]; striatum development [GO:0021756]	mitochondrion [GO:0005739]; nucleoplasm [GO:0005654]; ribonucleoprotein complex [GO:1990904]	DNA binding [GO:0003677]; mRNA 3'-UTR binding [GO:0003730]; ribonucleoprotein complex binding [GO:0043021]; RNA binding [GO:0003723]; selenocysteine insertion sequence binding [GO:0035368]	SECISBP2	Homo sapiens (Human)	854	95462	SUBCELLULAR LOCATION: [Isoform 1]: Nucleus {ECO:0000305}.; SUBCELLULAR LOCATION: [Isoform 2]: Mitochondrion {ECO:0000269|PubMed:19004874}.
N : R203M	Q99962	Q99962	7|7|3|3	20	5	4	1|0|0|0|0|0|0|0|0|0|0|0|0|0|0|0	1	1	1	1	1	4.83	50	0		TRUE	Q99962	SH3GL2	5	2.33333	12	68	17.6471	TRUE	Q99962	SH3G2_HUMAN	Endophilin-A1 (EEN-B1) (Endophilin-1) (SH3 domain protein 2A) (SH3 domain-containing GRB2-like protein 2)	cellular response to brain-derived neurotrophic factor stimulus [GO:1990416]; central nervous system development [GO:0007417]; dendrite extension [GO:0097484]; negative regulation of blood-brain barrier permeability [GO:1905604]; negative regulation of gene expression [GO:0010629]; negative regulation of protein phosphorylation [GO:0001933]; neuron projection development [GO:0031175]; signal tran…	cell projection [GO:0042995]; clathrin-coated endocytic vesicle membrane [GO:0030669]; cytoplasm [GO:0005737]; cytosol [GO:0005829]; early endosome [GO:0005769]; glutamatergic synapse [GO:0098978]; Golgi membrane [GO:0000139]; perinuclear region of cytoplasm [GO:0048471]; plasma membrane [GO:0005886]; presynapse [GO:0098793]	identical protein binding [GO:0042802]; lipid binding [GO:0008289]	SH3GL2	Homo sapiens (Human)	352	39962	SUBCELLULAR LOCATION: Cytoplasm {ECO:0000250|UniProtKB:O35179}. Membrane {ECO:0000250|UniProtKB:O35179}; Peripheral membrane protein {ECO:0000250|UniProtKB:O35179}. Early endosome {ECO:0000250|UniProtKB:Q62420}. Presynapse {ECO:0000250|UniProtKB:O35179}.
N : R203M	Q9BZD4	Q9BZD4	4|6|2|2	14	3.5	4	1|0|0|0|0|0|0|0|1|0|0|2|1|1|0|0	0.82	1	0.82	1	0.82	0.55	9.33	0.03		TRUE	Q9BZD4	NUF2	9	2.54545	11	68	16.1765	TRUE	Q9BZD4	NUF2_HUMAN	Kinetochore protein Nuf2 (hNuf2) (hNuf2R) (hsNuf2) (Cell division cycle-associated protein 1)	attachment of mitotic spindle microtubules to kinetochore [GO:0051315]; attachment of spindle microtubules to kinetochore [GO:0008608]; cell division [GO:0051301]; chromosome segregation [GO:0007059]; kinetochore organization [GO:0051383]; meiotic chromosome segregation [GO:0045132]; mitotic spindle assembly checkpoint signaling [GO:0007094]; mitotic spindle organization [GO:0007052]	chromosome, centromeric region [GO:0000775]; cytosol [GO:0005829]; kinetochore [GO:0000776]; membrane [GO:0016020]; Ndc80 complex [GO:0031262]; NMS complex [GO:0031617]; nucleoplasm [GO:0005654]	protein-containing complex binding [GO:0044877]	NUF2	Homo sapiens (Human)	464	54304	SUBCELLULAR LOCATION: Nucleus. Chromosome, centromere, kinetochore. Note=Localizes to kinetochores from late prophase to anaphase. Localizes specifically to the outer plate of the kinetochore. NDC80 is required for efficient kinetochore localization.
N : R203M	Q9BZV1	Q9BZV1	6|5|4|3	18	4.5	4	1|1|2|0|0|1|0|1|0|1|1|2|1|1|0|1	0.81	0.98	0.81	0.98	0.81	0.18	5.54	0.03		TRUE	Q9BZV1	UBXN6	2	1.29412	17	68	25	TRUE	Q9BZV1	UBXN6_HUMAN	UBX domain-containing protein 6 (UBX domain-containing protein 1)	endosome to lysosome transport via multivesicular body sorting pathway [GO:0032510]; ERAD pathway [GO:0036503]; macroautophagy [GO:0016236]	cytoplasm [GO:0005737]; cytosol [GO:0005829]; early endosome membrane [GO:0031901]; endosome [GO:0005768]; extracellular exosome [GO:0070062]; extrinsic component of membrane [GO:0019898]; late endosome membrane [GO:0031902]; lysosomal membrane [GO:0005765]; microtubule organizing center [GO:0005815]; nucleus [GO:0005634]; protein-containing complex [GO:0032991]		UBXN6	Homo sapiens (Human)	441	49754	SUBCELLULAR LOCATION: Cytoplasm {ECO:0000269|PubMed:18656546}. Cytoplasm, cytosol {ECO:0000269|PubMed:19275885}. Membrane {ECO:0000269|PubMed:19275885}; Peripheral membrane protein {ECO:0000269|PubMed:19275885}. Nucleus {ECO:0000269|PubMed:18656546}. Cytoplasm, cytoskeleton, microtubule organizing center, centrosome {ECO:0000269|PubMed:18656546}. Early endosome membrane {ECO:0000269|PubMed:218222…
N : R203M	Q9C0B9	Q9C0B9	5|7|5|5	22	5.5	4	0|0|0|0|0|0|0|0|0|0|0|0|1|0|0|0	1	1	1	1	1	8.25	55	0		TRUE	Q9C0B9	ZCCHC2	2	1.09091	11	68	16.1765	TRUE	Q9C0B9	ZCHC2_HUMAN	Zinc finger CCHC domain-containing protein 2		cytoplasm [GO:0005737]	nucleic acid binding [GO:0003676]; phosphatidylinositol binding [GO:0035091]; zinc ion binding [GO:0008270]	ZCCHC2	Homo sapiens (Human)	1178	125936
N : R203M	Q9C0D7	Q9C0D7	2|3|3|2	10	2.5	4	0|0|0|0|0|1|0|0|0|0|0|0|0|0|0|0	0.97	0.99	0.97	0.99	0.97	2.98	25	0.01		TRUE								TRUE	Q9C0D7	ZC12C_HUMAN	Probable ribonuclease ZC3H12C (EC 3.1.-.-) (MCP-induced protein 3) (Zinc finger CCCH domain-containing protein 12C)	RNA phosphodiester bond hydrolysis, endonucleolytic [GO:0090502]	cytoplasmic ribonucleoprotein granule [GO:0036464]; nucleus [GO:0005634]	endoribonuclease activity [GO:0004521]; metal ion binding [GO:0046872]; mRNA binding [GO:0003729]	ZC3H12C	Homo sapiens (Human)	883	99340
N : R203M	Q9GZZ9	Q9GZZ9	5|4|2|2	13	3.25	4	0|0|0|0|0|0|0|0|0|1|1|1|1|0|1|0	0.84	1	0.84	1	0.84	0.81	10.4	0.03		TRUE	Q9GZZ9	UBA5	4	1.625	8	68	11.7647	TRUE	Q9GZZ9	UBA5_HUMAN	Ubiquitin-like modifier-activating enzyme 5 (Ubiquitin-activating enzyme 5) (ThiFP1) (UFM1-activating enzyme) (Ubiquitin-activating enzyme E1 domain-containing protein 1)	erythrocyte differentiation [GO:0030218]; localization [GO:0051179]; megakaryocyte differentiation [GO:0030219]; neuromuscular process [GO:0050905]; protein K69-linked ufmylation [GO:1990592]; protein modification by small protein conjugation [GO:0032446]; protein ufmylation [GO:0071569]; regulation of intracellular estrogen receptor signaling pathway [GO:0033146]; response to endoplasmic reticul…	cytoplasm [GO:0005737]; cytosol [GO:0005829]; endoplasmic reticulum membrane [GO:0005789]; Golgi apparatus [GO:0005794]; intracellular membrane-bounded organelle [GO:0043231]; nucleus [GO:0005634]	ATP binding [GO:0005524]; protein homodimerization activity [GO:0042803]; UFM1 activating enzyme activity [GO:0071566]; zinc ion binding [GO:0008270]	UBA5	Homo sapiens (Human)	404	44863	SUBCELLULAR LOCATION: Cytoplasm {ECO:0000269|PubMed:18442052, ECO:0000269|PubMed:26872069}. Nucleus {ECO:0000269|PubMed:18442052}. Endoplasmic reticulum membrane {ECO:0000269|PubMed:30990354}. Golgi apparatus {ECO:0000269|PubMed:26872069}. Note=Localizes mainly in the cytoplasm, while it localizes to the nucleus in presence of SUMO2 (PubMed:18442052). Interaction with GABARAPL2 promotes localizat…
N : R203M	Q9H0J9	Q9H0J9	9|3|3|4	19	4.75	4	0|0|0|0|0|0|0|0|0|0|0|0|0|0|0|0	1	1	1	1	1	4.83	47.5	0		TRUE	Q9H0J9	PARP12	2	1.33333	3	68	4.41176	TRUE	Q9H0J9	PAR12_HUMAN	Protein mono-ADP-ribosyltransferase PARP12 (EC 2.4.2.-) (ADP-ribosyltransferase diphtheria toxin-like 12) (ARTD12) (Poly [ADP-ribose] polymerase 12) (PARP-12) (Zinc finger CCCH domain-containing protein 1)	protein auto-ADP-ribosylation [GO:0070213]	nucleus [GO:0005634]	metal ion binding [GO:0046872]; NAD+ ADP-ribosyltransferase activity [GO:0003950]; NAD+- protein-cysteine ADP-ribosyltransferase activity [GO:0140803]; NAD+-protein ADP-ribosyltransferase activity [GO:1990404]; nucleotidyltransferase activity [GO:0016779]; RNA binding [GO:0003723]	PARP12	Homo sapiens (Human)	701	79064	SUBCELLULAR LOCATION: Nucleus {ECO:0000305}.
N : R203M	Q9H3H3	Q9H3H3	5|4|8|3	20	5	4	0|0|0|0|0|0|0|0|0|0|0|0|0|0|0|0	1	1	1	1	1	4.83	50	0		TRUE								TRUE	Q9H3H3	CK068_HUMAN	UPF0696 protein C11orf68 (Basophilic leukemia-expressed protein Bles03) (Protein p5326)			RNA binding [GO:0003723]	C11orf68	Homo sapiens (Human)	292	31430
N : R203M	Q9H6Q4	Q9H6Q4	2|2|2|2	8	2	4	0|0|0|0|0|0|0|0|0|0|0|0|0|0|0|0	0.95	0.95	0.95	0.95	0.95	2.98	20	0.01		TRUE	Q9H6Q4	CIAO3	1	1	2	68	2.94118	TRUE	Q9H6Q4	CIAO3_HUMAN	Cytosolic iron-sulfur assembly component 3 (Cytosolic Fe-S cluster assembly factor NARFL) (Iron-only hydrogenase-like protein 1) (IOP1) (Nuclear prelamin A recognition factor-like protein) (Protein related to Narf)	hematopoietic progenitor cell differentiation [GO:0002244]; iron-sulfur cluster assembly [GO:0016226]; oxygen homeostasis [GO:0032364]; regulation of gene expression [GO:0010468]; response to hypoxia [GO:0001666]	CIA complex [GO:0097361]	4 iron, 4 sulfur cluster binding [GO:0051539]; metal ion binding [GO:0046872]	CIAO3	Homo sapiens (Human)	476	53020
N : R203M	Q9H788	Q9H788	8|7|4|4	23	5.75	4	1|0|2|0|1|1|0|2|1|0|0|2|1|2|2|2	0.82	1	0.82	1	0.82	0.61	5.41	0.03		TRUE	Q9H788	SH2D4A	4	1.66667	21	68	30.8824	TRUE	Q9H788	SH24A_HUMAN	SH2 domain-containing protein 4A (Protein SH(2)A) (Protein phosphatase 1 regulatory subunit 38)		cytoplasm [GO:0005737]; cytosol [GO:0005829]	phosphatase binding [GO:0019902]	SH2D4A	Homo sapiens (Human)	454	52727	SUBCELLULAR LOCATION: Cytoplasm {ECO:0000269|PubMed:18641339}. Note=Located at podocyte foot processes. {ECO:0000250}.
N : R203M	Q9H7E2	Q9H7E2	21|17|15|20	73	18.25	4	1|2|1|0|0|0|0|0|0|3|2|3|1|2|0|0	1	1	1	1	1	13.21	19.47	0		TRUE	Q9H7E2	TDRD3	7	1.85185	27	68	39.7059	TRUE	Q9H7E2	TDRD3_HUMAN	Tudor domain-containing protein 3	chromatin organization [GO:0006325]; DNA topological change [GO:0006265]	cytosol [GO:0005829]; DNA topoisomerase III-beta-TDRD3 complex [GO:0140225]; Golgi apparatus [GO:0005794]; nucleoplasm [GO:0005654]; nucleus [GO:0005634]	chromatin binding [GO:0003682]; methylated histone binding [GO:0035064]; RNA binding [GO:0003723]; transcription coactivator activity [GO:0003713]	TDRD3	Homo sapiens (Human)	651	73185	SUBCELLULAR LOCATION: Cytoplasm {ECO:0000269|PubMed:18632687}. Nucleus {ECO:0000269|PubMed:21172665}. Note=Predominantly cytoplasmic. Associated with actively translating polyribosomes and with mRNA stress granules. {ECO:0000269|PubMed:18632687, ECO:0000269|PubMed:18664458}.
N : R203M	Q9H9G7	Q9H9G7	15|20|21|19	75	18.75	4	1|1|2|0|0|0|0|0|0|2|3|2|0|0|2|2	1	1	1	1	1	16.33	20	0		TRUE	Q9H9G7	AGO3	9	2.47059	17	68	25	TRUE	Q9H9G7	AGO3_HUMAN	Protein argonaute-3 (Argonaute3) (hAgo3) (EC 3.1.26.n2) (Argonaute RISC catalytic component 3) (Eukaryotic translation initiation factor 2C 3) (eIF-2C 3) (eIF2C 3)	miRNA processing [GO:0035196]; miRNA-mediated gene silencing by inhibition of translation [GO:0035278]; mRNA catabolic process [GO:0006402]; positive regulation of gene expression [GO:0010628]; positive regulation of NIK/NF-kappaB signaling [GO:1901224]; pre-miRNA processing [GO:0031054]; regulation of stem cell proliferation [GO:0072091]; RISC complex assembly [GO:0070922]; RNA secondary structu…	condensed nuclear chromosome [GO:0000794]; cytoplasm [GO:0005737]; cytoplasmic ribonucleoprotein granule [GO:0036464]; cytosol [GO:0005829]; membrane [GO:0016020]; nucleoplasm [GO:0005654]; P-body [GO:0000932]; RISC complex [GO:0016442]; RISC-loading complex [GO:0070578]	double-stranded RNA binding [GO:0003725]; endoribonuclease activity [GO:0004521]; endoribonuclease activity, cleaving miRNA-paired mRNA [GO:0090624]; metal ion binding [GO:0046872]; miRNA binding [GO:0035198]; RNA binding [GO:0003723]; single-stranded RNA binding [GO:0003727]	AGO3	Homo sapiens (Human)	860	97360	SUBCELLULAR LOCATION: Cytoplasm, P-body {ECO:0000255|HAMAP-Rule:MF_03032, ECO:0000269|PubMed:16081698}.
N : R203M	Q9HAU5	Q9HAU5	9|8|7|4	28	7	4	1|2|2|0|1|1|1|0|0|3|1|1|0|0|1|2	0.92	1	0.92	1	0.92	0.79	7	0.01		TRUE	Q9HAU5	UPF2	6	1.75	24	68	35.2941	TRUE	Q9HAU5	RENT2_HUMAN	Regulator of nonsense transcripts 2 (Up-frameshift suppressor 2 homolog) (hUpf2)	animal organ regeneration [GO:0031100]; liver development [GO:0001889]; mRNA export from nucleus [GO:0006406]; nuclear-transcribed mRNA catabolic process, nonsense-mediated decay [GO:0000184]	cytoplasm [GO:0005737]; cytoplasmic ribonucleoprotein granule [GO:0036464]; cytosol [GO:0005829]; exon-exon junction complex [GO:0035145]; nucleus [GO:0005634]; perinuclear region of cytoplasm [GO:0048471]; polysome [GO:0005844]	molecular adaptor activity [GO:0060090]; RNA binding [GO:0003723]; telomeric DNA binding [GO:0042162]	UPF2	Homo sapiens (Human)	1272	147810	SUBCELLULAR LOCATION: Cytoplasm, perinuclear region {ECO:0000269|PubMed:11073994, ECO:0000269|PubMed:11113196, ECO:0000269|PubMed:11163187}. Cytoplasm {ECO:0000250|UniProtKB:A2AT37}.
N : R203M	Q9NQR4	Q9NQR4	9|10|8|11	38	9.5	4	2|1|1|0|0|0|0|0|0|1|1|1|5|2|1|0	0.99	1	0.99	1	0.99	3.74	10.13	0		TRUE	Q9NQR4	NIT2	5	1.57143	21	68	30.8824	TRUE	Q9NQR4	NIT2_HUMAN	Omega-amidase NIT2 (EC 3.5.1.3) (Nitrilase homolog 2)	asparagine metabolic process [GO:0006528]; glutamine metabolic process [GO:0006541]; oxaloacetate metabolic process [GO:0006107]	centrosome [GO:0005813]; cytosol [GO:0005829]; extracellular exosome [GO:0070062]; extracellular region [GO:0005576]; specific granule lumen [GO:0035580]; tertiary granule lumen [GO:1904724]	2-oxoglutaramate amidase activity [GO:0106008]; omega-amidase activity [GO:0050152]	NIT2	Homo sapiens (Human)	276	30608	SUBCELLULAR LOCATION: Cytoplasm {ECO:0000269|PubMed:17488281}.
N : R203M	Q9NQS1	Q9NQS1	10|10|10|11	41	10.25	4	3|3|3|0|0|0|0|0|0|2|2|1|1|2|2|2	1	1	1	1	1	8.77	7.81	0		TRUE	Q9NQS1	AVEN	3	1.5	32	68	47.0588	TRUE	Q9NQS1	AVEN_HUMAN	Cell death regulator Aven	apoptotic process [GO:0006915]; negative regulation of apoptotic process [GO:0043066]; negative regulation of G2/M transition of mitotic cell cycle [GO:0010972]	cytosol [GO:0005829]; endomembrane system [GO:0012505]; membrane [GO:0016020]		AVEN	Homo sapiens (Human)	362	38506	SUBCELLULAR LOCATION: Endomembrane system; Peripheral membrane protein. Note=Associated with intracellular membranes.
N : R203M	Q9NRF8	Q9NRF8	2|2|3|3	10	2.5	4	0|0|0|0|0|0|0|0|0|0|1|1|1|0|0|0	0.91	0.97	0.91	0.97	0.91	1.8	13.33	0.01		TRUE	Q9NRF8	CTPS2	4	1.61538	13	68	19.1176	TRUE	Q9NRF8	PYRG2_HUMAN	CTP synthase 2 (EC 6.3.4.2) (CTP synthetase 2) (UTP--ammonia ligase 2)	'de novo' CTP biosynthetic process [GO:0044210]; CTP biosynthetic process [GO:0006241]; glutamine metabolic process [GO:0006541]; pyrimidine nucleobase biosynthetic process [GO:0019856]; pyrimidine nucleotide metabolic process [GO:0006220]	cytoophidium [GO:0097268]; cytoplasm [GO:0005737]; cytosol [GO:0005829]	ATP binding [GO:0005524]; CTP synthase activity [GO:0003883]; identical protein binding [GO:0042802]	CTPS2	Homo sapiens (Human)	586	65678
N : R203M	Q9NRM2	Q9NRM2	4|6|3|5	18	4.5	4	0|0|0|0|0|0|0|0|0|0|0|0|0|0|0|0	1	1	1	1	1	4.83	45	0		TRUE	Q9NRM2	ZNF277	1	1	2	68	2.94118	TRUE	Q9NRM2	ZN277_HUMAN	Zinc finger protein 277 (Nuclear receptor-interacting factor 4)	cellular response to hydrogen peroxide [GO:0070301]; regulation of cellular senescence [GO:2000772]	nucleus [GO:0005634]	metal ion binding [GO:0046872]; RNA polymerase II cis-regulatory region sequence-specific DNA binding [GO:0000978]	ZNF277	Homo sapiens (Human)	450	52788	SUBCELLULAR LOCATION: Nucleus {ECO:0000305}.
N : R203M	Q9NSE4	Q9NSE4	13|12|14|12	51	12.75	4	4|3|4|0|0|0|1|0|2|5|4|2|1|2|1|3	1	1	1	1	1	5.7	6.38	0		TRUE	Q9NSE4	IARS2	5	2.25	32	68	47.0588	TRUE	Q9NSE4	SYIM_HUMAN	Isoleucine--tRNA ligase, mitochondrial (EC 6.1.1.5) (Isoleucyl-tRNA synthetase) (IleRS)	isoleucyl-tRNA aminoacylation [GO:0006428]; mitochondrial translation [GO:0032543]; tRNA aminoacylation for protein translation [GO:0006418]	mitochondrial matrix [GO:0005759]; mitochondrion [GO:0005739]	aminoacyl-tRNA editing activity [GO:0002161]; ATP binding [GO:0005524]; isoleucine-tRNA ligase activity [GO:0004822]; tRNA binding [GO:0000049]	IARS2	Homo sapiens (Human)	1012	113792	SUBCELLULAR LOCATION: Mitochondrion matrix {ECO:0000250}.
N : R203M	Q9NSV4	Q9NSV4	7|7|4|7	25	6.25	4	1|2|1|0|0|0|0|0|0|1|0|0|1|2|1|1	0.97	1	0.97	1	0.97	2.03	10	0.01		TRUE	Q9NSV4	DIAPH3	4	1.72222	18	68	26.4706	TRUE	Q9NSV4	DIAP3_HUMAN	Protein diaphanous homolog 3 (Diaphanous-related formin-3) (DRF3) (MDia2)	actin cytoskeleton organization [GO:0030036]; actin filament polymerization [GO:0030041]; cytoskeleton organization [GO:0007010]	actin filament [GO:0005884]; cytoplasm [GO:0005737]; cytosol [GO:0005829]; nucleus [GO:0005634]	actin binding [GO:0003779]; cadherin binding [GO:0045296]; small GTPase binding [GO:0031267]	DIAPH3	Homo sapiens (Human)	1193	136926	SUBCELLULAR LOCATION: Cytoplasm {ECO:0000269|PubMed:18755006, ECO:0000269|PubMed:19457867}. Nucleus {ECO:0000250|UniProtKB:Q9Z207}. Note=During mitosis, co-localizes with the actin-rich cleavage furrow and with the microtubule-rich central spindle during cytokinesis (PubMed:18755006, PubMed:19457867). Shuttles between the cytoplasm and the nucleus (By similarity). {ECO:0000250|UniProtKB:Q9Z207, E…
N : R203M	Q9NU19	Q9NU19	2|3|2|3	10	2.5	4	0|2|0|0|0|0|0|0|0|0|0|1|1|1|0|0	0.81	0.93	0.81	0.93	0.81	0.84	8	0.03		TRUE	Q9NU19	TBC1D22B	2	1.5	2	68	2.94118	TRUE	Q9NU19	TB22B_HUMAN	TBC1 domain family member 22B	activation of GTPase activity [GO:0090630]		14-3-3 protein binding [GO:0071889]; GTPase activator activity [GO:0005096]	TBC1D22B	Homo sapiens (Human)	505	59081
N : R203M	Q9NX05	Q9NX05	5|4|4|3	16	4	4	0|0|0|1|0|0|0|0|0|0|0|0|0|0|0|0	1	1	1	1	1	4.83	40	0		TRUE	Q9NX05	FAM120C	2	1.11111	9	68	13.2353	TRUE	Q9NX05	F120C_HUMAN	Constitutive coactivator of PPAR-gamma-like protein 2 (Protein FAM120C) (Tumor antigen BJ-HCC-21)		nucleus [GO:0005634]	RNA binding [GO:0003723]	FAM120C	Homo sapiens (Human)	1096	120588
N : R203M	Q9NZW5	Q9NZW5	2|2|3|2	9	2.25	4	0|0|0|0|0|0|0|0|0|0|0|0|0|0|0|0	0.96	0.99	0.96	0.99	0.96	2.98	22.5	0.01		TRUE	Q9NZW5	PALS2	2	1.14286	7	68	10.2941	TRUE	Q9NZW5	PALS2_HUMAN	Protein PALS2 (MAGUK p55 subfamily member 6) (Membrane protein, palmitoylated 6) (Veli-associated MAGUK 1) (VAM-1)	protein-containing complex assembly [GO:0065003]	cell-cell junction [GO:0005911]; extracellular exosome [GO:0070062]; membrane [GO:0016020]; plasma membrane [GO:0005886]		PALS2	Homo sapiens (Human)	540	61117	SUBCELLULAR LOCATION: Membrane {ECO:0000250}; Peripheral membrane protein {ECO:0000250}.
N : R203M	Q9P2R7	Q9P2R7	3|4|2|2	11	2.75	4	0|0|0|0|0|0|0|0|0|0|0|0|0|0|0|0	0.97	1	0.97	1	0.97	2.98	27.5	0		TRUE	Q9P2R7	SUCLA2	2	1.16667	6	68	8.82353	TRUE	Q9P2R7	SUCB1_HUMAN	Succinate--CoA ligase [ADP-forming] subunit beta, mitochondrial (EC 6.2.1.5) (ATP-specific succinyl-CoA synthetase subunit beta) (A-SCS) (Succinyl-CoA synthetase beta-A chain) (SCS-betaA)	succinate metabolic process [GO:0006105]; succinyl-CoA catabolic process [GO:1901289]; succinyl-CoA metabolic process [GO:0006104]; succinyl-CoA pathway [GO:0006781]; tricarboxylic acid cycle [GO:0006099]	extracellular exosome [GO:0070062]; mitochondrial matrix [GO:0005759]; mitochondrion [GO:0005739]; succinate-CoA ligase complex [GO:0042709]; succinate-CoA ligase complex (ADP-forming) [GO:0009361]	ATP binding [GO:0005524]; magnesium ion binding [GO:0000287]; succinate-CoA ligase (ADP-forming) activity [GO:0004775]	SUCLA2	Homo sapiens (Human)	463	50317	SUBCELLULAR LOCATION: Mitochondrion {ECO:0000255|HAMAP-Rule:MF_03220, ECO:0000269|PubMed:15877282, ECO:0000269|PubMed:17287286, ECO:0000269|PubMed:25944712}.
N : R203M	Q9UBN7	Q9UBN7	4|5|4|4	17	4.25	4	1|1|1|0|0|0|0|0|0|1|1|0|2|1|2|4	0.77	0.89	0.77	0.89	0.77	1.02	4.86	0.04		TRUE	Q9UBN7	HDAC6	4	1.36	25	68	36.7647	TRUE	Q9UBN7	HDAC6_HUMAN	Histone deacetylase 6 (HD6) (EC 3.5.1.98) (Tubulin-lysine deacetylase HDAC6) (EC 3.5.1.-)	aggresome assembly [GO:0070842]; autophagy [GO:0006914]; axonal transport of mitochondrion [GO:0019896]; cellular response to hydrogen peroxide [GO:0070301]; cellular response to misfolded protein [GO:0071218]; cellular response to parathyroid hormone stimulus [GO:0071374]; cellular response to topologically incorrect protein [GO:0035967]; cilium assembly [GO:0060271]; cilium disassembly [GO:0061…	aggresome [GO:0016235]; axon [GO:0030424]; axon cytoplasm [GO:1904115]; caveola [GO:0005901]; cell leading edge [GO:0031252]; centrosome [GO:0005813]; ciliary basal body [GO:0036064]; cytoplasm [GO:0005737]; cytosol [GO:0005829]; dendrite [GO:0030425]; histone deacetylase complex [GO:0000118]; inclusion body [GO:0016234]; microtubule [GO:0005874]; microtubule associated complex [GO:0005875]; mult…	actin binding [GO:0003779]; alpha-tubulin binding [GO:0043014]; beta-catenin binding [GO:0008013]; beta-tubulin binding [GO:0048487]; dynein complex binding [GO:0070840]; enzyme binding [GO:0019899]; histone deacetylase activity [GO:0004407]; histone deacetylase binding [GO:0042826]; Hsp90 protein binding [GO:0051879]; microtubule binding [GO:0008017]; misfolded protein binding [GO:0051787]; poly…	HDAC6	Homo sapiens (Human)	1215	131419	SUBCELLULAR LOCATION: Cytoplasm {ECO:0000269|PubMed:12024216, ECO:0000269|PubMed:24687993}. Cytoplasm, cytoskeleton {ECO:0000269|PubMed:12024216}. Nucleus {ECO:0000250|UniProtKB:Q9Z2V5}. Perikaryon {ECO:0000250|UniProtKB:Q9Z2V5}. Cell projection, dendrite {ECO:0000250|UniProtKB:Q9Z2V5}. Cell projection, axon {ECO:0000250|UniProtKB:Q9Z2V5}. Cell projection, cilium {ECO:0000269|PubMed:17604723}. No…
N : R203M	Q9UBQ7	Q9UBQ7	3|3|8|7	21	5.25	4	0|1|0|0|0|0|0|0|0|0|0|0|0|0|0|0	1	1	1	1	1	4.83	52.5	0		TRUE	Q9UBQ7	GRHPR	1	1	4	68	5.88235	TRUE	Q9UBQ7	GRHPR_HUMAN	Glyoxylate reductase/hydroxypyruvate reductase (EC 1.1.1.79) (EC 1.1.1.81)	carboxylic acid metabolic process [GO:0019752]; dicarboxylic acid metabolic process [GO:0043648]; glyoxylate metabolic process [GO:0046487]	catalytic complex [GO:1902494]; cytoplasm [GO:0005737]; cytosol [GO:0005829]; extracellular exosome [GO:0070062]; peroxisomal matrix [GO:0005782]	carboxylic acid binding [GO:0031406]; glycerate dehydrogenase activity [GO:0008465]; glyoxylate reductase (NADP+) activity [GO:0030267]; hydroxypyruvate reductase activity [GO:0016618]; NAD binding [GO:0051287]; NADPH binding [GO:0070402]; protein homodimerization activity [GO:0042803]	GRHPR	Homo sapiens (Human)	328	35668
N : R203M	Q9UGR2	Q9UGR2	2|3|2|2	9	2.25	4	0|0|0|0|1|0|1|0|0|0|0|0|0|0|0|0	0.94	0.99	0.94	0.99	0.94	2.59	18	0.01		TRUE	Q9UGR2	ZC3H7B	3	1.83333	6	68	8.82353	TRUE	Q9UGR2	Z3H7B_HUMAN	Zinc finger CCCH domain-containing protein 7B (Rotavirus 'X'-associated non-structural protein) (RoXaN)	miRNA processing [GO:0035196]; post-transcriptional regulation of gene expression [GO:0010608]	nucleus [GO:0005634]	metal ion binding [GO:0046872]; miRNA binding [GO:0035198]; RNA binding [GO:0003723]	ZC3H7B	Homo sapiens (Human)	977	109858	SUBCELLULAR LOCATION: Nucleus {ECO:0000269|PubMed:18799579}. Note=Nuclear localization seems to be depleted upon rotavirus A infection.
N : R203M	Q9UHG0	Q9UHG0	6|7|5|5	23	5.75	4	0|0|0|0|0|0|0|0|0|0|0|0|0|0|0|0	1	1	1	1	1	8.25	57.5	0		TRUE								TRUE	Q9UHG0	DCDC2_HUMAN	Doublecortin domain-containing protein 2 (Protein RU2S)	cellular defense response [GO:0006968]; cilium assembly [GO:0060271]; dendrite morphogenesis [GO:0048813]; intracellular signal transduction [GO:0035556]; neuron migration [GO:0001764]; positive regulation of smoothened signaling pathway [GO:0045880]; regulation of cilium assembly [GO:1902017]; regulation of Wnt signaling pathway [GO:0030111]; sensory perception of sound [GO:0007605]	axoneme [GO:0005930]; centriolar satellite [GO:0034451]; cilium [GO:0005929]; cytoplasm [GO:0005737]; cytosol [GO:0005829]; kinocilium [GO:0060091]; microtubule [GO:0005874]; microtubule cytoskeleton [GO:0015630]; microtubule organizing center [GO:0005815]; mitotic spindle [GO:0072686]	kinesin binding [GO:0019894]	DCDC2	Homo sapiens (Human)	476	52834	SUBCELLULAR LOCATION: Cell projection, cilium {ECO:0000269|PubMed:25601850, ECO:0000269|PubMed:27319779}. Cytoplasm, cytoskeleton, cilium axoneme {ECO:0000269|PubMed:25557784, ECO:0000269|PubMed:27319779}. Cell projection, kinocilium {ECO:0000250|UniProtKB:D3ZR10}. Cytoplasm, cytoskeleton {ECO:0000250|UniProtKB:D3ZR10}. Note=Localizes to the ciliary axoneme and to mitotic spindle fibers in a cell…
N : R203M	Q9UJT0	Q9UJT0	3|3|2|3	11	2.75	4	1|0|0|0|0|0|0|0|0|0|1|0|0|0|0|0	0.97	0.99	0.97	0.99	0.97	2.59	22	0.01		TRUE	Q9UJT0	TUBE1	1	1	2	68	2.94118	TRUE	Q9UJT0	TBE_HUMAN	Tubulin epsilon chain (Epsilon-tubulin)	centrosome cycle [GO:0007098]; microtubule cytoskeleton organization [GO:0000226]; mitotic cell cycle [GO:0000278]	cytoplasm [GO:0005737]; microtubule [GO:0005874]; pericentriolar material [GO:0000242]	GTP binding [GO:0005525]; structural constituent of cytoskeleton [GO:0005200]	TUBE1	Homo sapiens (Human)	475	52932	SUBCELLULAR LOCATION: Cytoplasm, cytoskeleton, microtubule organizing center, centrosome {ECO:0000269|PubMed:10620804}. Note=Associated with pericentriolar material. {ECO:0000269|PubMed:10620804}.
N : R203M	Q9UNI6	Q9UNI6	3|3|2|2	10	2.5	4	0|0|0|0|0|0|0|0|0|0|0|0|0|0|0|0	0.97	0.99	0.97	0.99	0.97	2.98	25	0.01		TRUE	Q9UNI6	DUSP12	1	1	5	68	7.35294	TRUE	Q9UNI6	DUS12_HUMAN	Dual specificity protein phosphatase 12 (EC 3.1.3.16) (EC 3.1.3.48) (Dual specificity tyrosine phosphatase YVH1)	dephosphorylation [GO:0016311]; positive regulation of glucokinase activity [GO:0033133]; protein dephosphorylation [GO:0006470]; protein modification process [GO:0036211]	cytoplasm [GO:0005737]; cytosol [GO:0005829]; nucleoplasm [GO:0005654]; nucleus [GO:0005634]	kinase binding [GO:0019900]; myosin phosphatase activity [GO:0017018]; phosphatase activity [GO:0016791]; protein tyrosine phosphatase activity [GO:0004725]; protein tyrosine/serine/threonine phosphatase activity [GO:0008138]; zinc ion binding [GO:0008270]	DUSP12	Homo sapiens (Human)	340	37687	SUBCELLULAR LOCATION: Nucleus {ECO:0000269|PubMed:10446167}. Cytoplasm, cytosol {ECO:0000269|PubMed:10446167}. Note=Primarily nuclear. Detected in a mesh-like pattern in the cytosol. {ECO:0000269|PubMed:10446167}.
N : R203M	Q9UNX3	Q9UNX3	6|7|6|3	22	5.5	4	0|0|0|0|0|0|0|0|0|0|0|0|0|0|0|0	1	1	1	1	1	4.83	55	0		TRUE	Q9UNX3	RPL26L1	3	1.71429	7	68	10.2941	TRUE	Q9UNX3	RL26L_HUMAN	60S ribosomal protein L26-like 1 (Large ribosomal subunit protein uL24-like 1)	cytoplasmic translation [GO:0002181]; ribosomal large subunit biogenesis [GO:0042273]	cytosolic large ribosomal subunit [GO:0022625]; extracellular exosome [GO:0070062]	RNA binding [GO:0003723]; structural constituent of ribosome [GO:0003735]	RPL26L1	Homo sapiens (Human)	145	17256
N : R203M	Q9Y287	Q9Y287	3|3|3|6	15	3.75	4	0|0|0|0|0|0|0|0|0|0|0|0|2|0|1|1	0.95	1	0.95	1	0.95	2.6	15	0.01		TRUE	Q9Y287	ITM2B	3	1.41667	12	68	17.6471	TRUE	Q9Y287	ITM2B_HUMAN	Integral membrane protein 2B (Immature BRI2) (imBRI2) (Protein E25B) (Transmembrane protein BRI) (Bri) [Cleaved into: BRI2, membrane form (Mature BRI2) (mBRI2); BRI2 intracellular domain (BRI2 ICD); BRI2C, soluble form; Bri23 peptide (Bri2-23) (ABri23) (C-terminal peptide) (P23 peptide)]	negative regulation of amyloid precursor protein biosynthetic process [GO:0042985]; nervous system development [GO:0007399]	endosome membrane [GO:0010008]; extracellular exosome [GO:0070062]; extracellular region [GO:0005576]; extracellular space [GO:0005615]; Golgi apparatus [GO:0005794]; Golgi membrane [GO:0000139]; Golgi-associated vesicle membrane [GO:0030660]; intracellular membrane-bounded organelle [GO:0043231]; membrane [GO:0016020]; organelle membrane [GO:0031090]; plasma membrane [GO:0005886]	amyloid-beta binding [GO:0001540]; ATP binding [GO:0005524]	ITM2B	Homo sapiens (Human)	266	30338	SUBCELLULAR LOCATION: [Integral membrane protein 2B]: Golgi apparatus membrane {ECO:0000269|PubMed:14656991, ECO:0000269|PubMed:19114711}; Single-pass type II membrane protein {ECO:0000269|PubMed:10526337}. Note=Immature BRI2 (imBRI2) is cleaved by furin in the Golgi into mBRI2 and a Bri23 peptide. mBRI2 is transported to the plasma membrane and Bri23 peptide is secreted.; SUBCELLULAR LOCATION: […
N : R203M	Q9Y2K5	Q9Y2K5	20|22|19|25	86	21.5	4	1|3|1|1|0|1|1|1|1|3|2|2|1|1|1|0	1	1	1	1	1	19.19	17.2	0		TRUE	Q9Y2K5	R3HDM2	3	1.23333	30	68	44.1176	TRUE	Q9Y2K5	R3HD2_HUMAN	R3H domain-containing protein 2		nucleus [GO:0005634]	RNA binding [GO:0003723]	R3HDM2	Homo sapiens (Human)	976	106999	SUBCELLULAR LOCATION: Nucleus {ECO:0000305}.
N : R203M	Q9Y315	Q9Y315	2|4|3|3	12	3	4	0|0|0|0|0|0|0|0|0|0|0|0|0|0|0|0	0.98	1	0.98	1	0.98	2.98	30	0		TRUE	Q9Y315	DERA	4	1.54545	11	68	16.1765	TRUE	Q9Y315	DEOC_HUMAN	Deoxyribose-phosphate aldolase (DERA) (EC 4.1.2.4) (2-deoxy-D-ribose 5-phosphate aldolase) (Phosphodeoxyriboaldolase) (Deoxyriboaldolase)	carbohydrate catabolic process [GO:0016052]; deoxyribonucleoside catabolic process [GO:0046121]; deoxyribonucleotide catabolic process [GO:0009264]; deoxyribose phosphate catabolic process [GO:0046386]; pentose-phosphate shunt [GO:0006098]	cytosol [GO:0005829]; extracellular region [GO:0005576]; ficolin-1-rich granule lumen [GO:1904813]; nucleoplasm [GO:0005654]; secretory granule lumen [GO:0034774]	deoxyribose-phosphate aldolase activity [GO:0004139]	DERA	Homo sapiens (Human)	318	35231	SUBCELLULAR LOCATION: Cytoplasm {ECO:0000269|PubMed:25229427}. Cytoplasmic granule {ECO:0000269|PubMed:25229427}. Nucleus {ECO:0000269|PubMed:25229427}. Note=Recruited to stress granules but not to processing bodies upon arsenite or clotrimazole treatment or energy deprivation. {ECO:0000269|PubMed:25229427}.
N : R203M	Q9Y6E0	Q9Y6E0	2|4|4|3	13	3.25	4	0|0|0|0|0|0|0|0|0|1|2|2|0|0|0|0	0.87	0.96	0.87	0.96	0.87	0.8	10.4	0.02		TRUE	Q9Y6E0	STK24	3	1.5	10	68	14.7059	TRUE	Q9Y6E0	STK24_HUMAN	Serine/threonine-protein kinase 24 (EC 2.7.11.1) (Mammalian STE20-like protein kinase 3) (MST-3) (STE20-like kinase MST3) [Cleaved into: Serine/threonine-protein kinase 24 36 kDa subunit (Mammalian STE20-like protein kinase 3 N-terminal) (MST3/N); Serine/threonine-protein kinase 24 12 kDa subunit (Mammalian STE20-like protein kinase 3 C-terminal) (MST3/C)]	cellular response to starvation [GO:0009267]; execution phase of apoptosis [GO:0097194]; intrinsic apoptotic signaling pathway in response to oxidative stress [GO:0008631]; negative regulation of cell migration [GO:0030336]; positive regulation of axon regeneration [GO:0048680]; protein autophosphorylation [GO:0046777]; protein phosphorylation [GO:0006468]; regulation of axon regeneration [GO:004…	cytoplasm [GO:0005737]; cytosol [GO:0005829]; extracellular exosome [GO:0070062]; Golgi apparatus [GO:0005794]; Golgi membrane [GO:0000139]; nucleolus [GO:0005730]; nucleoplasm [GO:0005654]; nucleus [GO:0005634]	ATP binding [GO:0005524]; cadherin binding [GO:0045296]; metal ion binding [GO:0046872]; protein kinase activity [GO:0004672]; protein serine kinase activity [GO:0106310]; protein serine/threonine kinase activity [GO:0004674]	STK24	Homo sapiens (Human)	443	49308	SUBCELLULAR LOCATION: Cytoplasm. Nucleus. Membrane. Note=The truncated form (MST3/N) translocates to the nucleus. Colocalizes with STK38L in the membrane.
N : S235F	P0DTC9	P0DTC9	200|245|334|308	1087	271.75	4	0|0|0|0|0|0|0|0|0|0|0|0|0|0|0|0	1	1	1	1	1	287.04	2717.5	0		TRUE								TRUE	P0DTC9	NCAP_SARS2	Nucleoprotein (N) (Nucleocapsid protein) (NC) (Protein N)	negative regulation of interferon-beta production [GO:0032688]; positive regulation of NLRP3 inflammasome complex assembly [GO:1900227]; response to host immune response [GO:0052572]; viral RNA genome packaging [GO:0019074]	host cell endoplasmic reticulum-Golgi intermediate compartment [GO:0044172]; host cell Golgi apparatus [GO:0044177]; host cell perinuclear region of cytoplasm [GO:0044220]; intracellular non-membrane-bounded organelle [GO:0043232]; MHC class I protein complex [GO:0042612]; ribonucleoprotein complex [GO:1990904]; viral capsid [GO:0019028]; viral nucleocapsid [GO:0019013]	identical protein binding [GO:0042802]; MHC class I protein binding [GO:0042288]; molecular condensate scaffold activity [GO:0140693]; protein homodimerization activity [GO:0042803]; RNA binding [GO:0003723]; RNA stem-loop binding [GO:0035613]	N	Severe acute respiratory syndrome coronavirus 2 (2019-nCoV) (SARS-CoV-2)	419	45626	SUBCELLULAR LOCATION: Virion {ECO:0000255|HAMAP-Rule:MF_04096}. Host cytoplasm {ECO:0000269|PubMed:33060197, ECO:0000269|PubMed:34341353}. Secreted {ECO:0000269|PubMed:35921414}. Host extracellular space {ECO:0000269|PubMed:35921414}. Note=Probably associates with ER-derived membranes where it participates in viral RNA synthesis and virus budding. When located inside the virion, complexed with th…
N : S235F	P22570	P22570	5|4|6|6	21	5.25	4	2|3|2|0|0|0|0|0|0|0|1|0|0|0|0|0	0.94	0.97	0.94	0.97	0.94	1.9	10.5	0.01		TRUE	P22570	FDXR	3	2	4	68	5.88235	TRUE	P22570	ADRO_HUMAN	NADPH:adrenodoxin oxidoreductase, mitochondrial (AR) (Adrenodoxin reductase) (EC 1.18.1.6) (Ferredoxin--NADP(+) reductase) (Ferredoxin reductase)	cholesterol metabolic process [GO:0008203]; generation of precursor metabolites and energy [GO:0006091]; steroid biosynthetic process [GO:0006694]; ubiquinone biosynthetic process [GO:0006744]	mitochondrial inner membrane [GO:0005743]; mitochondrial matrix [GO:0005759]; mitochondrion [GO:0005739]	ferredoxin-NADP+ reductase activity [GO:0004324]; NADPH-adrenodoxin reductase activity [GO:0015039]; oxidoreductase activity [GO:0016491]	FDXR	Homo sapiens (Human)	491	53837	SUBCELLULAR LOCATION: Mitochondrion inner membrane {ECO:0000250|UniProtKB:P48360}; Peripheral membrane protein {ECO:0000305}.
N : S235F	P50395	P50395	2|2|29|38	71	17.75	4	0|0|0|0|0|0|0|0|0|0|0|1|1|1|0|0	0.93	1	0.93	1	0.93	1.8	94.67	0.01		TRUE	P50395	GDI2	9	3.26667	30	68	44.1176	TRUE	P50395	GDIB_HUMAN	Rab GDP dissociation inhibitor beta (Rab GDI beta) (Guanosine diphosphate dissociation inhibitor 2) (GDI-2)	negative regulation of cilium assembly [GO:1902018]; negative regulation of protein localization to cilium [GO:1903565]; protein transport [GO:0015031]; signal transduction [GO:0007165]; small GTPase mediated signal transduction [GO:0007264]; vesicle-mediated transport [GO:0016192]	azurophil granule lumen [GO:0035578]; cytoplasm [GO:0005737]; cytosol [GO:0005829]; extracellular exosome [GO:0070062]; extracellular region [GO:0005576]; focal adhesion [GO:0005925]; Golgi apparatus [GO:0005794]; membrane [GO:0016020]; secretory granule lumen [GO:0034774]; synapse [GO:0045202]; vesicle [GO:0031982]	GTPase activator activity [GO:0005096]; Rab GDP-dissociation inhibitor activity [GO:0005093]; RNA binding [GO:0003723]; small GTPase binding [GO:0031267]	GDI2	Homo sapiens (Human)	445	50663	SUBCELLULAR LOCATION: Cytoplasm {ECO:0000250}. Membrane {ECO:0000250}; Peripheral membrane protein {ECO:0000250}.
N : S235F	P55263	P55263	4|5|7|9	25	6.25	4	1|0|0|1|0|0|0|0|0|0|0|1|1|1|0|0	0.99	1	0.99	1	0.99	3.92	20	0		TRUE	P55263	ADK	1	1	3	68	4.41176	TRUE	P55263	ADK_HUMAN	Adenosine kinase (AK) (EC 2.7.1.20) (Adenosine 5'-phosphotransferase)	AMP salvage [GO:0044209]; dAMP salvage [GO:0106383]; dATP biosynthetic process [GO:0006175]; GMP salvage [GO:0032263]; phosphorylation [GO:0016310]; purine nucleobase metabolic process [GO:0006144]; purine ribonucleoside salvage [GO:0006166]; ribonucleoside monophosphate biosynthetic process [GO:0009156]	cytosol [GO:0005829]; nucleoplasm [GO:0005654]; nucleus [GO:0005634]; plasma membrane [GO:0005886]	adenosine kinase activity [GO:0004001]; ATP binding [GO:0005524]; deoxyadenosine kinase activity [GO:0004136]; metal ion binding [GO:0046872]; RNA binding [GO:0003723]	ADK	Homo sapiens (Human)	362	40545	SUBCELLULAR LOCATION: [Isoform 1]: Nucleus {ECO:0000269|PubMed:19635462}.; SUBCELLULAR LOCATION: [Isoform 2]: Cytoplasm {ECO:0000269|PubMed:19635462}.
N : S235F	P61586	P61586	2|2|6|6	16	4	4	0|0|0|0|0|0|0|0|0|0|0|0|4|1|1|1	0.78	0.96	0.78	0.96	0.78	0.36	9.14	0.04		TRUE	P61586	RHOA	2	1.21212	33	68	48.5294	TRUE	P61586	RHOA_HUMAN	Transforming protein RhoA (EC 3.6.5.2) (Rho cDNA clone 12) (h12)	actin cytoskeleton organization [GO:0030036]; actin cytoskeleton reorganization [GO:0031532]; actin filament organization [GO:0007015]; alpha-beta T cell lineage commitment [GO:0002363]; androgen receptor signaling pathway [GO:0030521]; angiotensin-mediated vasoconstriction involved in regulation of systemic arterial blood pressure [GO:0001998]; apical junction assembly [GO:0043297]; apolipoprote…	apical junction complex [GO:0043296]; axon [GO:0030424]; cell cortex [GO:0005938]; cell junction [GO:0030054]; cell periphery [GO:0071944]; cell projection [GO:0042995]; cleavage furrow [GO:0032154]; cytoplasmic vesicle [GO:0031410]; cytoskeleton [GO:0005856]; cytosol [GO:0005829]; dendritic spine [GO:0043197]; endoplasmic reticulum membrane [GO:0005789]; endosome [GO:0005768]; extracellular exos…	G protein activity [GO:0003925]; GDP binding [GO:0019003]; GTP binding [GO:0005525]; GTPase activity [GO:0003924]; myosin binding [GO:0017022]; protein domain specific binding [GO:0019904]; protein kinase binding [GO:0019901]; Rho GDP-dissociation inhibitor binding [GO:0051022]	RHOA	Homo sapiens (Human)	193	21768	SUBCELLULAR LOCATION: Cell membrane; Lipid-anchor; Cytoplasmic side. Cytoplasm, cytoskeleton. Cleavage furrow. Cytoplasm, cell cortex {ECO:0000269|PubMed:9635436}. Midbody. Cell projection, lamellipodium {ECO:0000250|UniProtKB:Q9QUI0}. Cell projection, dendrite {ECO:0000250|UniProtKB:Q9QUI0}. Nucleus {ECO:0000269|PubMed:12551911}. Note=Localized to cell-cell contacts in calcium-treated keratinocy…
N : S235F	Q86XP1	Q86XP1	6|9|12|12	39	9.75	4	4|2|3|0|0|0|0|0|0|3|5|3|6|5|3|3	0.75	0.97	0.75	0.97	0.75	-1.07	4.22	0.04		TRUE	Q86XP1	DGKH	6	3.12121	33	68	48.5294	TRUE	Q86XP1	DGKH_HUMAN	Diacylglycerol kinase eta (DAG kinase eta) (EC 2.7.1.107) (Diglyceride kinase eta) (DGK-eta)	diacylglycerol metabolic process [GO:0046339]; intracellular signal transduction [GO:0035556]; lipid phosphorylation [GO:0046834]; negative regulation of catalytic activity [GO:0043086]; phosphatidic acid biosynthetic process [GO:0006654]; phosphatidic acid metabolic process [GO:0046473]; platelet activation [GO:0030168]; protein kinase C-activating G protein-coupled receptor signaling pathway [G…	actin cytoskeleton [GO:0015629]; cytoplasm [GO:0005737]; endosome [GO:0005768]; intracellular membrane-bounded organelle [GO:0043231]; plasma membrane [GO:0005886]; protein-containing complex [GO:0032991]	ATP binding [GO:0005524]; diacylglycerol kinase activity [GO:0004143]; identical protein binding [GO:0042802]; kinase binding [GO:0019900]; metal ion binding [GO:0046872]; SAM domain binding [GO:0032093]	DGKH	Homo sapiens (Human)	1220	134866	SUBCELLULAR LOCATION: Cytoplasm {ECO:0000269|PubMed:12810723, ECO:0000269|PubMed:19710016}. Cell membrane {ECO:0000269|PubMed:12810723, ECO:0000269|PubMed:19710016}. Note=Translocated from the cytoplasm to endosomes in response to stress stimuli (PubMed:12810723). Isoform 2 is rapidly relocated back to the cytoplasm upon removal of stress stimuli, whereas isoform 1 exhibits sustained endosomal as…
N : S235F	Q8N0Z6	Q8N0Z6	2|4|2|4	12	3	4	0|0|0|0|0|0|0|0|0|0|0|0|0|0|0|0	0.98	1	0.98	1	0.98	2.98	30	0		TRUE								TRUE	Q8N0Z6	TTC5_HUMAN	Tetratricopeptide repeat protein 5 (TPR repeat protein 5) (Stress-responsive activator of p300) (Protein Strap)	cellular response to DNA damage stimulus [GO:0006974]; cellular response to starvation [GO:0009267]; DNA repair [GO:0006281]; positive regulation of mRNA catabolic process [GO:0061014]; positive regulation of transcription by RNA polymerase II [GO:0045944]	cytoplasmic vesicle [GO:0031410]; cytosol [GO:0005829]; mitochondrial matrix [GO:0005759]; mitochondrion [GO:0005739]; nucleoplasm [GO:0005654]	chromatin binding [GO:0003682]; DNA binding [GO:0003677]; ribosome binding [GO:0043022]	TTC5	Homo sapiens (Human)	440	48928	SUBCELLULAR LOCATION: Nucleus {ECO:0000250|UniProtKB:Q99LG4}. Cytoplasm {ECO:0000269|PubMed:31727855}. Cytoplasmic vesicle {ECO:0000250|UniProtKB:Q99LG4}. Mitochondrion matrix {ECO:0000250|UniProtKB:Q99LG4}. Note=Phosphorylation at Ser-203 results in nuclear localization, while unphosphorylated protein localizes to the cytoplasm. Nuclear localization may be necessary for DNA damage-dependent stab…
N : S235F	Q8NFF5	Q8NFF5	4|5|9|6	24	6	4	0|0|1|0|0|0|0|0|0|0|1|1|1|2|2|2	0.98	1	0.98	1	0.98	2.67	9.6	0		TRUE	Q8NFF5	FLAD1	6	1.83333	24	68	35.2941	TRUE	Q8NFF5	FAD1_HUMAN	FAD synthase (EC 2.7.7.2) (FAD pyrophosphorylase) (FMN adenylyltransferase) (Flavin adenine dinucleotide synthase) [Includes: Molybdenum cofactor biosynthesis protein-like region; FAD synthase region]	FAD biosynthetic process [GO:0006747]; riboflavin metabolic process [GO:0006771]	cytosol [GO:0005829]; mitochondrial matrix [GO:0005759]; plasma membrane [GO:0005886]	ATP binding [GO:0005524]; FMN adenylyltransferase activity [GO:0003919]; identical protein binding [GO:0042802]	FLAD1	Homo sapiens (Human)	587	65266	SUBCELLULAR LOCATION: [Isoform 1]: Mitochondrion matrix {ECO:0000269|PubMed:20060505}.; SUBCELLULAR LOCATION: [Isoform 2]: Cytoplasm.
N : S235F	Q8WUD1	Q8WUD1	1|4|5|5	15	3.75	4	0|0|0|0|0|0|0|0|0|0|0|0|0|1|0|0	0.75	1	0.75	1	0.75	0.95	37.5	0.04		TRUE	Q8WUD1	RAB2B	4	2.2	10	68	14.7059	TRUE	Q8WUD1	RAB2B_HUMAN	Ras-related protein Rab-2B (EC 3.6.5.2)	defense response to virus [GO:0051607]; Golgi organization [GO:0007030]; innate immune response [GO:0045087]; positive regulation of exocytosis [GO:0045921]; positive regulation of type I interferon production [GO:0032481]; protein transport [GO:0015031]; vesicle-mediated transport [GO:0016192]	acrosomal vesicle [GO:0001669]; endoplasmic reticulum membrane [GO:0005789]; extracellular exosome [GO:0070062]; Golgi apparatus [GO:0005794]; Golgi membrane [GO:0000139]; plasma membrane [GO:0005886]	GTP binding [GO:0005525]; GTPase activity [GO:0003924]	RAB2B	Homo sapiens (Human)	216	24214	SUBCELLULAR LOCATION: Cell membrane {ECO:0000250|UniProtKB:P59279}; Lipid-anchor {ECO:0000250|UniProtKB:P59279}; Cytoplasmic side {ECO:0000250|UniProtKB:P59279}. Endoplasmic reticulum membrane {ECO:0000250|UniProtKB:P59279}; Lipid-anchor {ECO:0000250|UniProtKB:P59279}. Golgi apparatus membrane {ECO:0000250|UniProtKB:P59279}; Lipid-anchor {ECO:0000250|UniProtKB:P59279}. Cytoplasmic vesicle, secret…
N : S235F	Q96BM9	Q96BM9	5|5|6|5	21	5.25	4	0|0|0|0|0|0|0|0|0|0|0|0|0|0|0|0	1	1	1	1	1	8.25	52.5	0		TRUE	Q96BM9	ARL8A	2	1.09524	21	68	30.8824	TRUE	Q96BM9	ARL8A_HUMAN	ADP-ribosylation factor-like protein 8A (ADP-ribosylation factor-like protein 10B) (Novel small G protein indispensable for equal chromosome segregation 2)	anterograde axonal transport [GO:0008089]; cell cycle [GO:0007049]; cell division [GO:0051301]; chromosome segregation [GO:0007059]; protein transport [GO:0015031]	axon cytoplasm [GO:1904115]; azurophil granule membrane [GO:0035577]; cytoplasm [GO:0005737]; extracellular exosome [GO:0070062]; ficolin-1-rich granule membrane [GO:0101003]; late endosome membrane [GO:0031902]; lysosomal membrane [GO:0005765]; membrane [GO:0016020]; midbody [GO:0030496]; plasma membrane [GO:0005886]; spindle midzone [GO:0051233]; synapse [GO:0045202]	alpha-tubulin binding [GO:0043014]; beta-tubulin binding [GO:0048487]; GTP binding [GO:0005525]; GTPase activity [GO:0003924]	ARL8A	Homo sapiens (Human)	186	21416	SUBCELLULAR LOCATION: Late endosome membrane {ECO:0000250|UniProtKB:Q9NVJ2}. Lysosome membrane {ECO:0000250|UniProtKB:Q9CQW2}. Cytoplasm, cytoskeleton, spindle {ECO:0000250|UniProtKB:Q9NVJ2}. Cell projection, axon {ECO:0000250|UniProtKB:Q9CQW2}. Synapse {ECO:0000250|UniProtKB:Q9CQW2}. Note=Localizes with microtubules at the spindle mid-zone during mitosis. {ECO:0000250|UniProtKB:Q9NVJ2}.
N : T205I	O43592	O43592	11|27|13|24	75	18.75	4	0|0|0|0|0|1|0|0|0|0|0|0|0|3|2|3	1	1	1	1	1	6.15	33.33	0		TRUE	O43592	XPOT	43	4.83333	24	68	35.2941	TRUE	O43592	XPOT_HUMAN	Exportin-T (Exportin(tRNA)) (tRNA exportin)	intracellular protein transport [GO:0006886]; tRNA export from nucleus [GO:0006409]; tRNA re-export from nucleus [GO:0071528]	cytoplasm [GO:0005737]; cytosol [GO:0005829]; nuclear matrix [GO:0016363]; nuclear pore [GO:0005643]; nucleoplasm [GO:0005654]	small GTPase binding [GO:0031267]; tRNA binding [GO:0000049]	XPOT	Homo sapiens (Human)	962	109964	SUBCELLULAR LOCATION: Nucleus. Cytoplasm. Note=Nuclear, once bound to tRNA and Ran the complex translocates to the cytoplasm. Shuttles between the nucleus and the cytoplasm.
N : T205I	O75569	O75569	6|10|12|6	34	8.5	4	0|0|0|0|0|0|1|0|0|0|1|2|0|0|0|0	1	1	1	1	1	6.72	34	0		TRUE	O75569	PRKRA	6	2.33333	9	68	13.2353	TRUE	O75569	PRKRA_HUMAN	Interferon-inducible double-stranded RNA-dependent protein kinase activator A (PKR-associated protein X) (PKR-associating protein X) (Protein activator of the interferon-induced protein kinase) (Protein kinase, interferon-inducible double-stranded RNA-dependent activator)	cellular response to oxidative stress [GO:0034599]; immune response [GO:0006955]; middle ear morphogenesis [GO:0042474]; miRNA processing [GO:0035196]; negative regulation of cell population proliferation [GO:0008285]; outer ear morphogenesis [GO:0042473]; positive regulation of intrinsic apoptotic signaling pathway [GO:2001244]; pre-miRNA processing [GO:0031054]; protein phosphorylation [GO:0006…	cytoplasm [GO:0005737]; cytosol [GO:0005829]; membrane [GO:0016020]; nucleoplasm [GO:0005654]; nucleus [GO:0005634]; perinuclear region of cytoplasm [GO:0048471]; RISC complex [GO:0016442]; RISC-loading complex [GO:0070578]	double-stranded RNA binding [GO:0003725]; enzyme activator activity [GO:0008047]; enzyme binding [GO:0019899]; identical protein binding [GO:0042802]; pre-miRNA binding [GO:0070883]; protein homodimerization activity [GO:0042803]; RNA binding [GO:0003723]; siRNA binding [GO:0035197]	PRKRA	Homo sapiens (Human)	313	34404	SUBCELLULAR LOCATION: Cytoplasm, perinuclear region. Cytoplasm.
N : T205I	O75616	O75616	5|10|3|9	27	6.75	4	0|0|0|0|0|0|0|1|1|0|0|0|0|0|1|1	0.98	1	0.98	1	0.98	2.79	27	0		TRUE	O75616	ERAL1	5	1.70833	24	68	35.2941	TRUE	O75616	ERAL1_HUMAN	GTPase Era, mitochondrial (H-ERA) (hERA) (Conserved ERA-like GTPase) (CEGA) (ERA-W) (ERA-like protein 1)	ribosomal small subunit assembly [GO:0000028]	cytosol [GO:0005829]; mitochondrial inner membrane [GO:0005743]; mitochondrial matrix [GO:0005759]; mitochondrion [GO:0005739]	GTP binding [GO:0005525]; ribosomal small subunit binding [GO:0043024]; RNA binding [GO:0003723]; rRNA binding [GO:0019843]	ERAL1	Homo sapiens (Human)	437	48350	SUBCELLULAR LOCATION: Mitochondrion matrix. Mitochondrion inner membrane; Peripheral membrane protein. Note=Localizes on the matrix side on the mitochondrial inner membrane.
N : T205I	P04114	P04114	2|8|2|3	15	3.75	4	0|0|0|0|0|0|0|1|0|0|0|0|0|0|0|1	0.96	1	0.96	1	0.96	2.59	30	0.01		TRUE	P04114	APOB	7	2.42857	7	68	10.2941	TRUE	P04114	APOB_HUMAN	Apolipoprotein B-100 (Apo B-100) [Cleaved into: Apolipoprotein B-48 (Apo B-48)]	artery morphogenesis [GO:0048844]; cellular response to prostaglandin stimulus [GO:0071379]; cellular response to tumor necrosis factor [GO:0071356]; cholesterol efflux [GO:0033344]; cholesterol homeostasis [GO:0042632]; cholesterol metabolic process [GO:0008203]; cholesterol transport [GO:0030301]; establishment of localization in cell [GO:0051649]; fertilization [GO:0009566]; flagellated sperm …	chylomicron [GO:0042627]; chylomicron remnant [GO:0034360]; clathrin-coated endocytic vesicle membrane [GO:0030669]; cytoplasm [GO:0005737]; cytosol [GO:0005829]; early endosome [GO:0005769]; endocytic vesicle lumen [GO:0071682]; endoplasmic reticulum exit site [GO:0070971]; endoplasmic reticulum lumen [GO:0005788]; endoplasmic reticulum membrane [GO:0005789]; endosome lumen [GO:0031904]; endosom…	cholesterol transfer activity [GO:0120020]; heparin binding [GO:0008201]; lipase binding [GO:0035473]; low-density lipoprotein particle receptor binding [GO:0050750]; phospholipid binding [GO:0005543]	APOB	Homo sapiens (Human)	4563	515605	SUBCELLULAR LOCATION: Cytoplasm {ECO:0000269|PubMed:22580899}. Secreted {ECO:0000269|PubMed:22580899, ECO:0000269|PubMed:26224785}. Lipid droplet {ECO:0000269|PubMed:28183703}.
N : T205I	P0DTC9	P0DTC9	1065|1240|1044|1265	4614	1153.5	4	0|0|0|0|0|0|0|0|0|0|0|0|0|0|0|0	1	1	1	1	1	inf	11535	0		TRUE								TRUE	P0DTC9	NCAP_SARS2	Nucleoprotein (N) (Nucleocapsid protein) (NC) (Protein N)	negative regulation of interferon-beta production [GO:0032688]; positive regulation of NLRP3 inflammasome complex assembly [GO:1900227]; response to host immune response [GO:0052572]; viral RNA genome packaging [GO:0019074]	host cell endoplasmic reticulum-Golgi intermediate compartment [GO:0044172]; host cell Golgi apparatus [GO:0044177]; host cell perinuclear region of cytoplasm [GO:0044220]; intracellular non-membrane-bounded organelle [GO:0043232]; MHC class I protein complex [GO:0042612]; ribonucleoprotein complex [GO:1990904]; viral capsid [GO:0019028]; viral nucleocapsid [GO:0019013]	identical protein binding [GO:0042802]; MHC class I protein binding [GO:0042288]; molecular condensate scaffold activity [GO:0140693]; protein homodimerization activity [GO:0042803]; RNA binding [GO:0003723]; RNA stem-loop binding [GO:0035613]	N	Severe acute respiratory syndrome coronavirus 2 (2019-nCoV) (SARS-CoV-2)	419	45626	SUBCELLULAR LOCATION: Virion {ECO:0000255|HAMAP-Rule:MF_04096}. Host cytoplasm {ECO:0000269|PubMed:33060197, ECO:0000269|PubMed:34341353}. Secreted {ECO:0000269|PubMed:35921414}. Host extracellular space {ECO:0000269|PubMed:35921414}. Note=Probably associates with ER-derived membranes where it participates in viral RNA synthesis and virus budding. When located inside the virion, complexed with th…
N : T205I	P10321	P10321	6|2|7|4	19	4.75	4	0|0|0|0|0|0|1|0|0|0|0|0|0|0|0|0	0.99	1	0.99	1	0.99	2.98	47.5	0		TRUE	P10321	HLA-C	2	1.5	2	68	2.94118	TRUE	P10321	HLAC_HUMAN	HLA class I histocompatibility antigen, C alpha chain (HLA-C) (HLA-Cw) (Human leukocyte antigen C)	adaptive immune response [GO:0002250]; antigen processing and presentation of endogenous peptide antigen via MHC class I via ER pathway, TAP-independent [GO:0002486]; immune response [GO:0006955]; innate immune response [GO:0045087]	cell surface [GO:0009986]; early endosome membrane [GO:0031901]; endoplasmic reticulum [GO:0005783]; endoplasmic reticulum membrane [GO:0005789]; ER to Golgi transport vesicle membrane [GO:0012507]; extracellular exosome [GO:0070062]; Golgi apparatus [GO:0005794]; Golgi membrane [GO:0000139]; membrane [GO:0016020]; MHC class I protein complex [GO:0042612]; phagocytic vesicle membrane [GO:0030670]…	peptide antigen binding [GO:0042605]; TAP binding [GO:0046977]	HLA-C	Homo sapiens (Human)	366	40649	SUBCELLULAR LOCATION: Cell membrane {ECO:0000269|PubMed:18420581, ECO:0000269|PubMed:20972337, ECO:0000269|PubMed:28649982}; Single-pass type I membrane protein {ECO:0000255}. Endoplasmic reticulum membrane {ECO:0000305|PubMed:18420581}; Single-pass membrane protein {ECO:0000255}.
N : T205I	P24666	P24666	2|2|2|3	9	2.25	4	0|0|0|0|0|0|0|0|0|0|0|0|0|0|0|0	0.96	0.99	0.96	0.99	0.96	2.98	22.5	0.01		TRUE	P24666	ACP1	3	1.75	4	68	5.88235	TRUE	P24666	PPAC_HUMAN	Low molecular weight phosphotyrosine protein phosphatase (LMW-PTP) (LMW-PTPase) (EC 3.1.3.48) (Adipocyte acid phosphatase) (Low molecular weight cytosolic acid phosphatase) (EC 3.1.3.2) (Red cell acid phosphatase 1)	protein dephosphorylation [GO:0006470]	cytoplasm [GO:0005737]; cytoplasmic side of plasma membrane [GO:0009898]; cytosol [GO:0005829]; extracellular exosome [GO:0070062]; sarcolemma [GO:0042383]	acid phosphatase activity [GO:0003993]; non-membrane spanning protein tyrosine phosphatase activity [GO:0004726]; protein tyrosine phosphatase activity [GO:0004725]	ACP1	Homo sapiens (Human)	158	18042	SUBCELLULAR LOCATION: Cytoplasm.
N : T205I	P55786	P55786	8|11|6|15	40	10	4	1|0|0|1|0|3|0|0|3|0|0|1|0|0|0|2	0.99	1	0.99	1	0.99	3.07	14.55	0		TRUE	P55786	NPEPPS	6	1.92857	28	68	41.1765	TRUE	P55786	PSA_HUMAN	Puromycin-sensitive aminopeptidase (PSA) (EC 3.4.11.14) (Cytosol alanyl aminopeptidase) (AAP-S)	cellular response to hypoxia [GO:0071456]; peptide catabolic process [GO:0043171]; positive regulation of protein targeting to mitochondrion [GO:1903955]; protein polyubiquitination [GO:0000209]; proteolysis [GO:0006508]	cytoplasm [GO:0005737]; cytosol [GO:0005829]; extracellular exosome [GO:0070062]; nucleus [GO:0005634]	aminopeptidase activity [GO:0004177]; metalloaminopeptidase activity [GO:0070006]; peptide binding [GO:0042277]; zinc ion binding [GO:0008270]	NPEPPS	Homo sapiens (Human)	919	103276	SUBCELLULAR LOCATION: Cytoplasm, cytosol {ECO:0000269|PubMed:10978616}. Nucleus {ECO:0000305}.
N : T205I	Q00577	Q00577	5|6|4|6	21	5.25	4	0|0|0|1|1|1|1|0|0|0|0|0|1|0|0|0	0.99	1	0.99	1	0.99	3.92	16.8	0		TRUE	Q00577	PURA	5	1.59259	27	68	39.7059	TRUE	Q00577	PURA_HUMAN	Transcriptional activator protein Pur-alpha (Purine-rich single-stranded DNA-binding protein alpha)	cell differentiation [GO:0030154]; dendritic transport of messenger ribonucleoprotein complex [GO:0098963]; DNA replication initiation [GO:0006270]; DNA unwinding involved in DNA replication [GO:0006268]; epithelial cell proliferation [GO:0050673]; lymphocyte proliferation [GO:0046651]; negative regulation of DNA-binding transcription factor activity [GO:0043433]; negative regulation of transcrip…	chromosome, telomeric region [GO:0000781]; dendrite cytoplasm [GO:0032839]; glutamatergic synapse [GO:0098978]; neuronal cell body [GO:0043025]; nucleus [GO:0005634]; postsynapse [GO:0098794]	DNA-binding transcription factor activity, RNA polymerase II-specific [GO:0000981]; DNA-binding transcription factor binding [GO:0140297]; double-stranded telomeric DNA binding [GO:0003691]; mRNA regulatory element binding translation repressor activity [GO:0000900]; purine-rich negative regulatory element binding [GO:0032422]; RNA binding [GO:0003723]; RNA polymerase II transcription regulatory …	PURA	Homo sapiens (Human)	322	34911	SUBCELLULAR LOCATION: Nucleus.
N : T205I	Q6NZI2	Q6NZI2	5|10|6|11	32	8	4	0|0|0|0|0|0|0|0|0|0|1|1|1|0|0|1	1	1	1	1	1	5.99	32	0		TRUE	Q6NZI2	CAVIN1	3	1.38462	13	68	19.1176	TRUE	Q6NZI2	CAVN1_HUMAN	Caveolae-associated protein 1 (Cavin-1) (Polymerase I and transcript release factor)	positive regulation of cell motility [GO:2000147]; protein secretion [GO:0009306]; rRNA transcription [GO:0009303]; termination of RNA polymerase I transcription [GO:0006363]; transcription initiation at RNA polymerase I promoter [GO:0006361]	caveola [GO:0005901]; cytoplasm [GO:0005737]; cytosol [GO:0005829]; endoplasmic reticulum [GO:0005783]; intracellular membrane-bounded organelle [GO:0043231]; membrane raft [GO:0045121]; mitochondrion [GO:0005739]; nucleoplasm [GO:0005654]; nucleus [GO:0005634]; plasma membrane [GO:0005886]; protein-containing complex [GO:0032991]	identical protein binding [GO:0042802]; RNA binding [GO:0003723]; rRNA primary transcript binding [GO:0042134]	CAVIN1	Homo sapiens (Human)	390	43476	SUBCELLULAR LOCATION: Membrane, caveola {ECO:0000269|PubMed:15242332, ECO:0000269|PubMed:18056712, ECO:0000269|PubMed:19525939}. Cell membrane {ECO:0000269|PubMed:15242332, ECO:0000269|PubMed:17026959, ECO:0000269|PubMed:18056712}. Microsome {ECO:0000269|PubMed:15242332, ECO:0000269|PubMed:17026959}. Endoplasmic reticulum {ECO:0000250|UniProtKB:P85125}. Cytoplasm, cytosol {ECO:0000269|PubMed:1524…
N : T205I	Q6SZW1	Q6SZW1	5|7|8|5	25	6.25	4	0|0|0|0|0|0|0|0|0|0|0|0|0|0|0|0	1	1	1	1	1	8.25	62.5	0		TRUE	Q6SZW1	SARM1	9	2.22222	9	68	13.2353	TRUE	Q6SZW1	SARM1_HUMAN	NAD(+) hydrolase SARM1 (NADase SARM1) (hSARM1) (EC 3.2.2.6) (NADP(+) hydrolase SARM1) (EC 3.2.2.-) (Sterile alpha and Armadillo repeat protein) (Sterile alpha and TIR motif-containing protein 1) (Sterile alpha motif domain-containing protein 2) (MyD88-5) (SAM domain-containing protein 2) (Tir-1 homolog) (HsTIR)	cell differentiation [GO:0030154]; innate immune response [GO:0045087]; NAD catabolic process [GO:0019677]; negative regulation of MyD88-independent toll-like receptor signaling pathway [GO:0034128]; nervous system development [GO:0007399]; positive regulation of neuron death [GO:1901216]; regulation of dendrite morphogenesis [GO:0048814]; regulation of neuron apoptotic process [GO:0043523]; regu…	axon [GO:0030424]; cytoplasm [GO:0005737]; cytosol [GO:0005829]; dendrite [GO:0030425]; extrinsic component of mitochondrial outer membrane [GO:0031315]; microtubule [GO:0005874]; mitochondrion [GO:0005739]; synapse [GO:0045202]	identical protein binding [GO:0042802]; NAD(P)+ nucleosidase activity [GO:0050135]; NAD+ nucleosidase activity [GO:0003953]; NAD+ nucleotidase, cyclic ADP-ribose generating [GO:0061809]; signaling adaptor activity [GO:0035591]	SARM1	Homo sapiens (Human)	724	79388	SUBCELLULAR LOCATION: Cytoplasm {ECO:0000269|PubMed:20306472}. Cell projection, axon {ECO:0000250|UniProtKB:Q6PDS3}. Cell projection, dendrite {ECO:0000250|UniProtKB:Q6PDS3}. Synapse {ECO:0000250|UniProtKB:Q6PDS3}. Mitochondrion {ECO:0000269|PubMed:20306472, ECO:0000269|PubMed:22145856}. Note=Associated with microtubules. {ECO:0000250|UniProtKB:Q6PDS3}.
N : T205I	Q8IWU5	Q8IWU5	2|3|3|4	12	3	4	0|0|0|0|0|0|0|0|0|0|0|0|0|0|0|1	0.98	1	0.98	1	0.98	2.98	30	0		TRUE	Q8IWU5	SULF2	1	1	4	68	5.88235	TRUE	Q8IWU5	SULF2_HUMAN	Extracellular sulfatase Sulf-2 (hSulf-2) (EC 3.1.6.-)	bone development [GO:0060348]; cartilage development [GO:0051216]; chondrocyte development [GO:0002063]; embryonic skeletal system development [GO:0048706]; esophagus smooth muscle contraction [GO:0014846]; glial cell-derived neurotrophic factor receptor signaling pathway [GO:0035860]; glomerular basement membrane development [GO:0032836]; glomerular filtration [GO:0003094]; heparan sulfate prote…	cell surface [GO:0009986]; endoplasmic reticulum [GO:0005783]; extracellular space [GO:0005615]; Golgi stack [GO:0005795]; plasma membrane [GO:0005886]	arylsulfatase activity [GO:0004065]; calcium ion binding [GO:0005509]; glycosaminoglycan binding [GO:0005539]; N-acetylglucosamine-6-sulfatase activity [GO:0008449]	SULF2	Homo sapiens (Human)	870	100455	SUBCELLULAR LOCATION: Endoplasmic reticulum {ECO:0000250}. Golgi apparatus, Golgi stack {ECO:0000250}. Cell surface {ECO:0000250}. Note=Also localized on the cell surface. {ECO:0000250}.
N : T205I	Q8TCT9	Q8TCT9	2|11|2|5	20	5	4	0|0|0|0|1|0|0|0|0|0|0|0|0|1|0|0	0.97	1	0.97	1	0.97	2.59	40	0.01		TRUE	Q8TCT9	HM13	5	1.61538	26	68	38.2353	TRUE	Q8TCT9	HM13_HUMAN	Minor histocompatibility antigen H13 (EC 3.4.23.-) (Intramembrane protease 1) (IMP-1) (IMPAS-1) (hIMP1) (Presenilin-like protein 3) (Signal peptide peptidase)	in utero embryonic development [GO:0001701]; membrane protein proteolysis [GO:0033619]; membrane protein proteolysis involved in retrograde protein transport, ER to cytosol [GO:1904211]; regulation of heme oxygenase activity [GO:0061960]; signal peptide processing [GO:0006465]	cell surface [GO:0009986]; cytoplasmic side of endoplasmic reticulum membrane [GO:0098554]; Derlin-1 retrotranslocation complex [GO:0036513]; endoplasmic reticulum [GO:0005783]; endoplasmic reticulum membrane [GO:0005789]; lumenal side of endoplasmic reticulum membrane [GO:0098553]; membrane [GO:0016020]; plasma membrane [GO:0005886]; rough endoplasmic reticulum [GO:0005791]	aspartic endopeptidase activity, intramembrane cleaving [GO:0042500]; peptidase activity [GO:0008233]; protein homodimerization activity [GO:0042803]; ubiquitin protein ligase binding [GO:0031625]	HM13	Homo sapiens (Human)	377	41488	SUBCELLULAR LOCATION: Endoplasmic reticulum membrane {ECO:0000269|PubMed:15998642}; Multi-pass membrane protein {ECO:0000305}. Membrane {ECO:0000269|PubMed:12077416, ECO:0000269|PubMed:15385547}; Multi-pass membrane protein {ECO:0000305}; Lumenal side {ECO:0000269|PubMed:12077416, ECO:0000269|PubMed:15385547}.; SUBCELLULAR LOCATION: [Isoform 4]: Cell membrane {ECO:0000250|UniProtKB:Q9D8V0}; Multi…
N : T205I	Q92530	Q92530	2|2|2|2	8	2	4	0|0|0|0|0|0|0|0|0|0|0|0|0|0|0|0	0.95	0.95	0.95	0.95	0.95	2.98	20	0.01		TRUE	Q92530	PSMF1	3	1.3	10	68	14.7059	TRUE	Q92530	PSMF1_HUMAN	Proteasome inhibitor PI31 subunit (hPI31)	negative regulation of proteasomal protein catabolic process [GO:1901799]; proteasome-mediated ubiquitin-dependent protein catabolic process [GO:0043161]; ubiquitin-dependent protein catabolic process [GO:0006511]	cytosol [GO:0005829]; endoplasmic reticulum [GO:0005783]; membrane [GO:0016020]; nucleoplasm [GO:0005654]; perinuclear region of cytoplasm [GO:0048471]; proteasome core complex [GO:0005839]	endopeptidase inhibitor activity [GO:0004866]; proteasome binding [GO:0070628]; protein heterodimerization activity [GO:0046982]; protein homodimerization activity [GO:0042803]	PSMF1	Homo sapiens (Human)	271	29817	SUBCELLULAR LOCATION: Cytoplasm {ECO:0000269|PubMed:18495667}. Endoplasmic reticulum {ECO:0000269|PubMed:18495667}.
N : T205I	Q9BQ75	Q9BQ75	3|4|2|2	11	2.75	4	0|0|0|1|0|0|0|1|0|0|1|0|0|0|1|2	0.8	0.99	0.8	0.99	0.8	0.55	7.33	0.03		TRUE	Q9BQ75	CMSS1	3	1.66667	9	68	13.2353	TRUE	Q9BQ75	CMS1_HUMAN	Protein CMSS1 (Cms1 ribosomal small subunit homolog)			RNA binding [GO:0003723]	CMSS1	Homo sapiens (Human)	279	31884
N : T205I	Q9Y287	Q9Y287	10|8|8|8	34	8.5	4	0|0|0|0|0|0|0|0|0|0|0|0|2|0|1|1	1	1	1	1	1	9.35	34	0		TRUE	Q9Y287	ITM2B	3	1.41667	12	68	17.6471	TRUE	Q9Y287	ITM2B_HUMAN	Integral membrane protein 2B (Immature BRI2) (imBRI2) (Protein E25B) (Transmembrane protein BRI) (Bri) [Cleaved into: BRI2, membrane form (Mature BRI2) (mBRI2); BRI2 intracellular domain (BRI2 ICD); BRI2C, soluble form; Bri23 peptide (Bri2-23) (ABri23) (C-terminal peptide) (P23 peptide)]	negative regulation of amyloid precursor protein biosynthetic process [GO:0042985]; nervous system development [GO:0007399]	endosome membrane [GO:0010008]; extracellular exosome [GO:0070062]; extracellular region [GO:0005576]; extracellular space [GO:0005615]; Golgi apparatus [GO:0005794]; Golgi membrane [GO:0000139]; Golgi-associated vesicle membrane [GO:0030660]; intracellular membrane-bounded organelle [GO:0043231]; membrane [GO:0016020]; organelle membrane [GO:0031090]; plasma membrane [GO:0005886]	amyloid-beta binding [GO:0001540]; ATP binding [GO:0005524]	ITM2B	Homo sapiens (Human)	266	30338	SUBCELLULAR LOCATION: [Integral membrane protein 2B]: Golgi apparatus membrane {ECO:0000269|PubMed:14656991, ECO:0000269|PubMed:19114711}; Single-pass type II membrane protein {ECO:0000269|PubMed:10526337}. Note=Immature BRI2 (imBRI2) is cleaved by furin in the Golgi into mBRI2 and a Bri23 peptide. mBRI2 is transported to the plasma membrane and Bri23 peptide is secreted.; SUBCELLULAR LOCATION: […
N : WT	A0AV96	A0AV96	13|13|6|7	39	9.75	4	0|0|0|1|1|0|0|0|0|0|0|1|0|0|0|0	1	1	1	1	1	8.4	52	0		TRUE	A0AV96	RBM47	2	1.2	5	68	7.35294	TRUE	A0AV96	RBM47_HUMAN	RNA-binding protein 47 (RNA-binding motif protein 47)	cytidine to uridine editing [GO:0016554]; hematopoietic progenitor cell differentiation [GO:0002244]	nucleus [GO:0005634]	mRNA binding [GO:0003729]; RNA binding [GO:0003723]	RBM47	Homo sapiens (Human)	593	64099	SUBCELLULAR LOCATION: Nucleus {ECO:0000250}.
N : WT	O76041	O76041	3|2|2|3	10	2.5	4	0|0|0|0|0|0|0|0|0|0|0|0|0|0|0|0	0.97	0.99	0.97	0.99	0.97	2.98	25	0.01		TRUE	O76041	NEBL	3	1.625	8	68	11.7647	TRUE	O76041	NEBL_HUMAN	Nebulette (Actin-binding Z-disk protein)	cardiac muscle thin filament assembly [GO:0071691]	extracellular exosome [GO:0070062]; I band [GO:0031674]; stress fiber [GO:0001725]; Z disc [GO:0030018]	actin filament binding [GO:0051015]; cytoskeletal protein binding [GO:0008092]; filamin binding [GO:0031005]; structural constituent of muscle [GO:0008307]; tropomyosin binding [GO:0005523]	NEBL	Homo sapiens (Human)	1014	116453	SUBCELLULAR LOCATION: [Isoform 2]: Cytoplasm {ECO:0000269|PubMed:15004028}.
N : WT	P00374	P00374	6|4|3|6	19	4.75	4	0|0|0|0|0|0|0|0|0|0|0|0|0|0|0|0	1	1	1	1	1	4.83	47.5	0		TRUE	P00374	DHFR	3	2	2	68	2.94118	TRUE	P00374	DYR_HUMAN	Dihydrofolate reductase (EC 1.5.1.3)	axon regeneration [GO:0031103]; dihydrofolate metabolic process [GO:0046452]; folic acid metabolic process [GO:0046655]; glycine biosynthetic process [GO:0006545]; negative regulation of translation [GO:0017148]; one-carbon metabolic process [GO:0006730]; positive regulation of nitric-oxide synthase activity [GO:0051000]; regulation of removal of superoxide radicals [GO:2000121]; response to meth…	cytosol [GO:0005829]; mitochondrion [GO:0005739]	dihydrofolate reductase activity [GO:0004146]; folic acid binding [GO:0005542]; mRNA binding [GO:0003729]; mRNA regulatory element binding translation repressor activity [GO:0000900]; NADP binding [GO:0050661]; NADPH binding [GO:0070402]; sequence-specific mRNA binding [GO:1990825]	DHFR	Homo sapiens (Human)	187	21453	SUBCELLULAR LOCATION: Mitochondrion {ECO:0000250|UniProtKB:P00375}. Cytoplasm {ECO:0000250|UniProtKB:P00375}.
N : WT	P0DTC9	P0DTC9	392|353|391|417	1553	388.25	4	0|0|0|0|0|0|0|0|0|0|0|0|0|0|0|0	1	1	1	1	1	502.48	3882.5	0		TRUE								TRUE	P0DTC9	NCAP_SARS2	Nucleoprotein (N) (Nucleocapsid protein) (NC) (Protein N)	negative regulation of interferon-beta production [GO:0032688]; positive regulation of NLRP3 inflammasome complex assembly [GO:1900227]; response to host immune response [GO:0052572]; viral RNA genome packaging [GO:0019074]	host cell endoplasmic reticulum-Golgi intermediate compartment [GO:0044172]; host cell Golgi apparatus [GO:0044177]; host cell perinuclear region of cytoplasm [GO:0044220]; intracellular non-membrane-bounded organelle [GO:0043232]; MHC class I protein complex [GO:0042612]; ribonucleoprotein complex [GO:1990904]; viral capsid [GO:0019028]; viral nucleocapsid [GO:0019013]	identical protein binding [GO:0042802]; MHC class I protein binding [GO:0042288]; molecular condensate scaffold activity [GO:0140693]; protein homodimerization activity [GO:0042803]; RNA binding [GO:0003723]; RNA stem-loop binding [GO:0035613]	N	Severe acute respiratory syndrome coronavirus 2 (2019-nCoV) (SARS-CoV-2)	419	45626	SUBCELLULAR LOCATION: Virion {ECO:0000255|HAMAP-Rule:MF_04096}. Host cytoplasm {ECO:0000269|PubMed:33060197, ECO:0000269|PubMed:34341353}. Secreted {ECO:0000269|PubMed:35921414}. Host extracellular space {ECO:0000269|PubMed:35921414}. Note=Probably associates with ER-derived membranes where it participates in viral RNA synthesis and virus budding. When located inside the virion, complexed with th…
N : WT	P34913	P34913	2|2|4|4	12	3	4	0|0|0|0|0|0|0|0|0|0|0|0|1|2|0|0	0.91	0.98	0.91	0.98	0.91	1.7	16	0.01		TRUE	P34913	EPHX2	2	1.33333	12	68	17.6471	TRUE	P34913	HYES_HUMAN	Bifunctional epoxide hydrolase 2 [Includes: Cytosolic epoxide hydrolase 2 (CEH) (EC 3.3.2.10) (Epoxide hydratase) (Soluble epoxide hydrolase) (SEH); Lipid-phosphate phosphatase (EC 3.1.3.76)]	cholesterol homeostasis [GO:0042632]; dephosphorylation [GO:0016311]; epoxide metabolic process [GO:0097176]; phospholipid dephosphorylation [GO:0046839]; positive regulation of gene expression [GO:0010628]; regulation of cholesterol metabolic process [GO:0090181]; response to toxic substance [GO:0009636]; stilbene catabolic process [GO:0046272]	cytosol [GO:0005829]; extracellular exosome [GO:0070062]; peroxisomal matrix [GO:0005782]; peroxisome [GO:0005777]	10-hydroxy-9-(phosphonooxy)octadecanoate phosphatase activity [GO:0033885]; epoxide hydrolase activity [GO:0004301]; hydrolase activity [GO:0016787]; lipid phosphatase activity [GO:0042577]; lysophosphatidic acid phosphatase activity [GO:0052642]; magnesium ion binding [GO:0000287]; phosphatase activity [GO:0016791]; protein homodimerization activity [GO:0042803]; toxic substance binding [GO:0015…	EPHX2	Homo sapiens (Human)	555	62616	SUBCELLULAR LOCATION: Cytoplasm. Peroxisome.
N : WT	P42765	P42765	5|5|5|6	21	5.25	4	0|0|0|0|0|0|0|0|0|0|0|0|0|0|0|0	1	1	1	1	1	8.25	52.5	0		TRUE	P42765	ACAA2	2	1.08333	12	68	17.6471	TRUE	P42765	THIM_HUMAN	3-ketoacyl-CoA thiolase, mitochondrial (EC 2.3.1.16) (Acetyl-CoA acetyltransferase) (EC 2.3.1.9) (Acetyl-CoA acyltransferase) (Acyl-CoA hydrolase, mitochondrial) (EC 3.1.2.-, EC 3.1.2.1, EC 3.1.2.2) (Beta-ketothiolase) (Mitochondrial 3-oxoacyl-CoA thiolase) (T1)	cellular response to hypoxia [GO:0071456]; cholesterol biosynthetic process [GO:0006695]; fatty acid beta-oxidation [GO:0006635]; negative regulation of mitochondrial membrane permeability involved in apoptotic process [GO:1902109]; negative regulation of mitochondrial outer membrane permeabilization involved in apoptotic signaling pathway [GO:1901029]	mitochondrial matrix [GO:0005759]; mitochondrion [GO:0005739]	acetyl-CoA C-acetyltransferase activity [GO:0003985]; acetyl-CoA C-acyltransferase activity [GO:0003988]; acetyl-CoA hydrolase activity [GO:0003986]; acyl-CoA hydrolase activity [GO:0047617]; myristoyl-CoA hydrolase activity [GO:0102991]; palmitoyl-CoA hydrolase activity [GO:0016290]; RNA binding [GO:0003723]	ACAA2	Homo sapiens (Human)	397	41924	SUBCELLULAR LOCATION: Mitochondrion {ECO:0000269|PubMed:18371312}.
N : WT	P43897	P43897	3|2|4|2	11	2.75	4	0|0|0|1|2|1|0|1|0|0|0|0|0|0|0|0	0.83	0.99	0.83	0.99	0.83	0.84	8.8	0.03		TRUE	P43897	TSFM	3	1.5	12	68	17.6471	TRUE	P43897	EFTS_HUMAN	Elongation factor Ts, mitochondrial (EF-Ts) (EF-TsMt)	mitochondrial translational elongation [GO:0070125]; regulation of DNA-templated transcription elongation [GO:0032784]; regulation of mitochondrial translation [GO:0070129]; translational elongation [GO:0006414]	mitochondrial matrix [GO:0005759]; mitochondrion [GO:0005739]; nucleoplasm [GO:0005654]	RNA binding [GO:0003723]; translation elongation factor activity [GO:0003746]	TSFM	Homo sapiens (Human)	325	35391	SUBCELLULAR LOCATION: Mitochondrion.
N : WT	P49840	P49840	12|6|11|9	38	9.5	4	1|1|0|2|3|1|1|0|0|1|1|0|0|0|1|1	0.99	1	0.99	1	0.99	3.86	11.69	0		TRUE	P49840	GSK3A	5	1.55556	27	68	39.7059	TRUE	P49840	GSK3A_HUMAN	Glycogen synthase kinase-3 alpha (GSK-3 alpha) (EC 2.7.11.26) (Serine/threonine-protein kinase GSK3A) (EC 2.7.11.1)	aging [GO:0007568]; cardiac left ventricle morphogenesis [GO:0003214]; cell migration [GO:0016477]; cellular response to glucocorticoid stimulus [GO:0071385]; cellular response to insulin stimulus [GO:0032869]; cellular response to interleukin-3 [GO:0036016]; cellular response to lithium ion [GO:0071285]; dopamine receptor signaling pathway [GO:0007212]; excitatory postsynaptic potential [GO:0060…	apical dendrite [GO:0097440]; axon [GO:0030424]; beta-catenin destruction complex [GO:0030877]; cytoplasm [GO:0005737]; cytosol [GO:0005829]; microtubule [GO:0005874]; mitochondrion [GO:0005739]; neuronal cell body [GO:0043025]; nucleus [GO:0005634]; postsynapse [GO:0098794]; proximal dendrite [GO:1990635]	ATP binding [GO:0005524]; protein kinase A catalytic subunit binding [GO:0034236]; protein serine kinase activity [GO:0106310]; protein serine/threonine kinase activity [GO:0004674]; protein serine/threonine kinase binding [GO:0120283]; signaling receptor binding [GO:0005102]; tau protein binding [GO:0048156]; tau-protein kinase activity [GO:0050321]	GSK3A	Homo sapiens (Human)	483	50981
N : WT	P53384	P53384	5|5|3|5	18	4.5	4	0|0|0|0|0|0|0|0|0|0|0|0|0|0|0|1	1	1	1	1	1	4.83	45	0		TRUE	P53384	NUBP1	2	1.42857	7	68	10.2941	TRUE	P53384	NUBP1_HUMAN	Cytosolic Fe-S cluster assembly factor NUBP1 (Nucleotide-binding protein 1) (NBP 1)	cell projection organization [GO:0030030]; cellular iron ion homeostasis [GO:0006879]; centrosome localization [GO:0051642]; iron-sulfur cluster assembly [GO:0016226]; negative regulation of centrosome duplication [GO:0010826]; protein localization to cell cortex [GO:0072697]; regulation of cell growth [GO:0001558]	centriole [GO:0005814]; cilium [GO:0005929]; cytosol [GO:0005829]; nucleus [GO:0005634]; plasma membrane [GO:0005886]	4 iron, 4 sulfur cluster binding [GO:0051539]; ATP binding [GO:0005524]; ATP-dependent FeS chaperone activity [GO:0140663]; iron-sulfur cluster binding [GO:0051536]; metal ion binding [GO:0046872]; nucleotide binding [GO:0000166]	NUBP1	Homo sapiens (Human)	320	34534	SUBCELLULAR LOCATION: Cytoplasm {ECO:0000255|HAMAP-Rule:MF_03038, ECO:0000269|PubMed:18573874, ECO:0000269|PubMed:29848660}. Nucleus {ECO:0000250|UniProtKB:Q9R060}. Cell projection {ECO:0000250|UniProtKB:Q9R060}. Cytoplasm, cytoskeleton, cilium axoneme {ECO:0000250|UniProtKB:Q9R060}. Cytoplasm, cytoskeleton, cilium basal body {ECO:0000250|UniProtKB:Q9R060}. Cytoplasm, cytoskeleton, microtubule or…
N : WT	Q05397	Q05397	4|6|2|4	16	4	4	0|0|0|0|0|0|0|0|0|0|0|0|1|2|3|1	0.83	0.98	0.83	0.98	0.83	0.23	9.14	0.03		TRUE	Q05397	PTK2	3	1.63636	11	68	16.1765	TRUE	Q05397	FAK1_HUMAN	Focal adhesion kinase 1 (FADK 1) (EC 2.7.10.2) (Focal adhesion kinase-related nonkinase) (FRNK) (Protein phosphatase 1 regulatory subunit 71) (PPP1R71) (Protein-tyrosine kinase 2) (p125FAK) (pp125FAK)	angiogenesis [GO:0001525]; axon guidance [GO:0007411]; cell differentiation [GO:0030154]; cell migration [GO:0016477]; cell motility [GO:0048870]; detection of muscle stretch [GO:0035995]; ephrin receptor signaling pathway [GO:0048013]; epidermal growth factor receptor signaling pathway [GO:0007173]; establishment of cell polarity [GO:0030010]; Fc-gamma receptor signaling pathway involved in phag…	cell cortex [GO:0005938]; ciliary basal body [GO:0036064]; cytoplasm [GO:0005737]; cytoskeleton [GO:0005856]; cytosol [GO:0005829]; dendritic spine [GO:0043197]; extrinsic component of cytoplasmic side of plasma membrane [GO:0031234]; focal adhesion [GO:0005925]; intracellular membrane-bounded organelle [GO:0043231]; nucleus [GO:0005634]; perinuclear region of cytoplasm [GO:0048471]; plasma membr…	actin binding [GO:0003779]; ATP binding [GO:0005524]; integrin binding [GO:0005178]; JUN kinase binding [GO:0008432]; molecular function activator activity [GO:0140677]; non-membrane spanning protein tyrosine kinase activity [GO:0004715]; protein kinase binding [GO:0019901]; protein phosphatase binding [GO:0019903]; protein tyrosine kinase activity [GO:0004713]; protein tyrosine phosphatase activ…	PTK2	Homo sapiens (Human)	1052	119233	SUBCELLULAR LOCATION: Cell junction, focal adhesion {ECO:0000269|PubMed:10655584, ECO:0000269|PubMed:15855171, ECO:0000269|PubMed:18206965, ECO:0000269|PubMed:18256281, ECO:0000269|PubMed:31630787}. Cell membrane {ECO:0000250|UniProtKB:Q00944}; Peripheral membrane protein {ECO:0000250|UniProtKB:Q00944}; Cytoplasmic side {ECO:0000250|UniProtKB:Q00944}. Cytoplasm, perinuclear region {ECO:0000269|Pu…
N : WT	Q08257	Q08257	10|14|10|6	40	10	4	0|0|0|0|0|0|0|0|0|0|0|0|0|1|1|0	1	1	1	1	1	9.41	80	0		TRUE	Q08257	CRYZ	2	1.14286	7	68	10.2941	TRUE	Q08257	QOR_HUMAN	Quinone oxidoreductase (EC 1.6.5.5) (NADPH:quinone reductase) (Zeta-crystallin)	protein homotetramerization [GO:0051289]; visual perception [GO:0007601]; xenobiotic catabolic process [GO:0042178]	cytosol [GO:0005829]; extracellular exosome [GO:0070062]	identical protein binding [GO:0042802]; mRNA 3'-UTR binding [GO:0003730]; NADPH binding [GO:0070402]; NADPH:quinone reductase activity [GO:0003960]; zinc ion binding [GO:0008270]	CRYZ	Homo sapiens (Human)	329	35207	SUBCELLULAR LOCATION: Cytoplasm {ECO:0000269|PubMed:20103721}.
N : WT	Q12849	Q12849	12|15|27|19	73	18.25	4	0|0|0|0|0|0|1|0|0|0|0|0|0|1|0|0	1	1	1	1	1	18.73	146	0		TRUE	Q12849	GRSF1	5	2	33	68	48.5294	TRUE	Q12849	GRSF1_HUMAN	G-rich sequence factor 1 (GRSF-1)	anterior/posterior pattern specification [GO:0009952]; morphogenesis of embryonic epithelium [GO:0016331]; mRNA polyadenylation [GO:0006378]; positive regulation of mitochondrial RNA catabolic process [GO:0000962]; regulation of RNA splicing [GO:0043484]; tRNA processing [GO:0008033]	cytoplasm [GO:0005737]; mitochondrial nucleoid [GO:0042645]; mitochondrion [GO:0005739]; nucleoplasm [GO:0005654]; ribonucleoprotein complex [GO:1990904]; ribonucleoprotein granule [GO:0035770]	mRNA binding [GO:0003729]; RNA binding [GO:0003723]	GRSF1	Homo sapiens (Human)	480	53126	SUBCELLULAR LOCATION: [Isoform 1]: Mitochondrion matrix {ECO:0000269|PubMed:23473033, ECO:0000269|PubMed:23473034, ECO:0000269|PubMed:25683715, ECO:0000269|PubMed:29967381}. Note=Localizes to mitochondrial RNA granules found in close proximity to the mitochondrial nucleoids. {ECO:0000269|PubMed:23473033, ECO:0000269|PubMed:23473034, ECO:0000269|PubMed:25683715}.; SUBCELLULAR LOCATION: [Isoform 2]…
N : WT	Q15032	Q15032	14|12|10|12	48	12	4	0|2|0|0|0|0|0|0|0|2|1|3|0|0|0|0	1	1	1	1	1	6.5	24	0		TRUE	Q15032	R3HDM1	3	1.66667	15	68	22.0588	TRUE	Q15032	R3HD1_HUMAN	R3H domain-containing protein 1			RNA binding [GO:0003723]	R3HDM1	Homo sapiens (Human)	1099	120696
N : WT	Q16254	Q16254	2|4|2|3	11	2.75	4	0|0|0|0|0|0|0|0|0|0|0|0|0|0|0|0	0.97	1	0.97	1	0.97	2.98	27.5	0		TRUE	Q16254	E2F4	1	1	7	68	10.2941	TRUE	Q16254	E2F4_HUMAN	Transcription factor E2F4 (E2F-4)	animal organ morphogenesis [GO:0009887]; blood circulation [GO:0008015]; cell volume homeostasis [GO:0006884]; centriole assembly [GO:0098534]; epithelial cell development [GO:0002064]; motile cilium assembly [GO:0044458]; multi-ciliated epithelial cell differentiation [GO:1903251]; positive regulation of transcription by RNA polymerase II [GO:0045944]; regulation of cell population proliferation…	chromatin [GO:0000785]; cytoplasm [GO:0005737]; nucleoplasm [GO:0005654]; RNA polymerase II transcription regulator complex [GO:0090575]	DNA binding [GO:0003677]; DNA-binding transcription activator activity [GO:0001216]; DNA-binding transcription activator activity, RNA polymerase II-specific [GO:0001228]; DNA-binding transcription factor activity [GO:0003700]; DNA-binding transcription factor activity, RNA polymerase II-specific [GO:0000981]; promoter-specific chromatin binding [GO:1990841]; protein dimerization activity [GO:004…	E2F4	Homo sapiens (Human)	413	43960	SUBCELLULAR LOCATION: Nucleus.
N : WT	Q17RS7	Q17RS7	4|3|10|5	22	5.5	4	2|1|2|0|0|0|0|0|0|1|3|2|1|3|0|0	0.75	1	0.75	1	0.75	-0.23	5.87	0.04		TRUE	Q17RS7	GEN1	3	1.47826	23	68	33.8235	TRUE	Q17RS7	GEN_HUMAN	Flap endonuclease GEN homolog 1 (EC 3.1.-.-)	double-strand break repair via homologous recombination [GO:0000724]; positive regulation of mitotic cell cycle spindle assembly checkpoint [GO:0090267]; regulation of centrosome duplication [GO:0010824]; replication fork processing [GO:0031297]; resolution of mitotic recombination intermediates [GO:0071140]; resolution of recombination intermediates [GO:0071139]	centrosome [GO:0005813]; nucleoplasm [GO:0005654]	5'-flap endonuclease activity [GO:0017108]; crossover junction endodeoxyribonuclease activity [GO:0008821]; four-way junction DNA binding [GO:0000400]; magnesium ion binding [GO:0000287]; protein homodimerization activity [GO:0042803]	GEN1	Homo sapiens (Human)	908	102884	SUBCELLULAR LOCATION: Nucleus {ECO:0000305|PubMed:26578604, ECO:0000305|PubMed:28049850}.
N : WT	Q659C4	Q659C4	18|11|8|6	43	10.75	4	1|1|2|0|0|0|0|0|0|3|1|2|4|3|2|5	0.92	1	0.92	1	0.92	1.07	7.17	0.01		TRUE	Q659C4	LARP1B	7	2.57576	33	68	48.5294	TRUE	Q659C4	LAR1B_HUMAN	La-related protein 1B (La ribonucleoprotein domain family member 1B) (La ribonucleoprotein domain family member 2) (La-related protein 2)	positive regulation of translation [GO:0045727]	cytoplasmic stress granule [GO:0010494]; cytosol [GO:0005829]; nucleus [GO:0005634]	RNA binding [GO:0003723]	LARP1B	Homo sapiens (Human)	914	105322
N : WT	Q8N0Z6	Q8N0Z6	4|2|4|5	15	3.75	4	0|0|0|0|0|0|0|0|0|0|0|0|0|0|0|0	0.99	1	0.99	1	0.99	2.98	37.5	0		TRUE								TRUE	Q8N0Z6	TTC5_HUMAN	Tetratricopeptide repeat protein 5 (TPR repeat protein 5) (Stress-responsive activator of p300) (Protein Strap)	cellular response to DNA damage stimulus [GO:0006974]; cellular response to starvation [GO:0009267]; DNA repair [GO:0006281]; positive regulation of mRNA catabolic process [GO:0061014]; positive regulation of transcription by RNA polymerase II [GO:0045944]	cytoplasmic vesicle [GO:0031410]; cytosol [GO:0005829]; mitochondrial matrix [GO:0005759]; mitochondrion [GO:0005739]; nucleoplasm [GO:0005654]	chromatin binding [GO:0003682]; DNA binding [GO:0003677]; ribosome binding [GO:0043022]	TTC5	Homo sapiens (Human)	440	48928	SUBCELLULAR LOCATION: Nucleus {ECO:0000250|UniProtKB:Q99LG4}. Cytoplasm {ECO:0000269|PubMed:31727855}. Cytoplasmic vesicle {ECO:0000250|UniProtKB:Q99LG4}. Mitochondrion matrix {ECO:0000250|UniProtKB:Q99LG4}. Note=Phosphorylation at Ser-203 results in nuclear localization, while unphosphorylated protein localizes to the cytoplasm. Nuclear localization may be necessary for DNA damage-dependent stab…
N : WT	Q8N137	Q8N137	2|2|4|4	12	3	4	0|1|0|0|0|0|0|0|0|0|0|0|0|0|0|0	0.98	1	0.98	1	0.98	2.98	30	0		TRUE	Q8N137	CNTROB	2	1.25	4	68	5.88235	TRUE	Q8N137	CNTRB_HUMAN	Centrobin (Centrosomal BRCA2-interacting protein) (LYST-interacting protein 8)	centriole replication [GO:0007099]; centrosome separation [GO:0051299]; mitotic cytokinetic process [GO:1902410]; regulation of cilium assembly [GO:1902017]	centriole [GO:0005814]; centrosome [GO:0005813]; cytoplasm [GO:0005737]	protein domain specific binding [GO:0019904]	CNTROB	Homo sapiens (Human)	903	101253	SUBCELLULAR LOCATION: Cytoplasm, cytoskeleton, microtubule organizing center, centrosome, centriole {ECO:0000269|PubMed:16275750}. Note=Centriole-associated, asymmetrically localizes to the daughter centriole.
N : WT	Q8WU79	Q8WU79	8|8|13|8	37	9.25	4	0|2|0|0|0|0|0|0|0|0|0|0|1|1|1|0	1	1	1	1	1	11.38	29.6	0		TRUE	Q8WU79	SMAP2	5	1.66667	27	68	39.7059	TRUE	Q8WU79	SMAP2_HUMAN	Stromal membrane-associated protein 2 (Stromal membrane-associated protein 1-like)		cytosol [GO:0005829]; nucleoplasm [GO:0005654]	GTPase activator activity [GO:0005096]; metal ion binding [GO:0046872]	SMAP2	Homo sapiens (Human)	429	46786	SUBCELLULAR LOCATION: Cytoplasm. Note=Detected in multiple foci throughout the cytoplasm and in juxtanuclear structures. {ECO:0000250}.
N : WT	Q96KP4	Q96KP4	7|6|12|15	40	10	4	3|2|3|1|0|0|1|1|1|3|4|5|4|2|0|5	0.75	1	0.75	1	0.75	-0.54	4.57	0.04		TRUE	Q96KP4	CNDP2	14	3.16129	31	68	45.5882	TRUE	Q96KP4	CNDP2_HUMAN	Cytosolic non-specific dipeptidase (EC 3.4.13.18) (CNDP dipeptidase 2) (Glutamate carboxypeptidase-like protein 1) (Peptidase A) (Threonyl dipeptidase)	proteolysis [GO:0006508]	cytosol [GO:0005829]; extracellular exosome [GO:0070062]; nucleoplasm [GO:0005654]	alanylglutamate dipeptidase activity [GO:0103046]; carboxypeptidase activity [GO:0004180]; dipeptidase activity [GO:0016805]; metal ion binding [GO:0046872]; metallodipeptidase activity [GO:0070573]; peptidase activity [GO:0008233]	CNDP2	Homo sapiens (Human)	475	52878	SUBCELLULAR LOCATION: Cytoplasm {ECO:0000269|PubMed:12473676, ECO:0000269|PubMed:17121880}.
N : WT	Q96T21	Q96T21	4|9|7|10	30	7.5	4	1|1|2|0|0|1|0|0|0|4|2|3|2|2|3|2	0.84	1	0.84	1	0.84	-0.51	5.22	0.03		TRUE	Q96T21	SECISBP2	3	1.62069	29	68	42.6471	TRUE	Q96T21	SEBP2_HUMAN	Selenocysteine insertion sequence-binding protein 2 (SECIS-binding protein 2)	forebrain neuron development [GO:0021884]; negative regulation of nuclear-transcribed mRNA catabolic process, nonsense-mediated decay [GO:2000623]; selenocysteine incorporation [GO:0001514]; striatum development [GO:0021756]	mitochondrion [GO:0005739]; nucleoplasm [GO:0005654]; ribonucleoprotein complex [GO:1990904]	DNA binding [GO:0003677]; mRNA 3'-UTR binding [GO:0003730]; ribonucleoprotein complex binding [GO:0043021]; RNA binding [GO:0003723]; selenocysteine insertion sequence binding [GO:0035368]	SECISBP2	Homo sapiens (Human)	854	95462	SUBCELLULAR LOCATION: [Isoform 1]: Nucleus {ECO:0000305}.; SUBCELLULAR LOCATION: [Isoform 2]: Mitochondrion {ECO:0000269|PubMed:19004874}.
N : WT	Q99719	Q99719	2|2|3|3	10	2.5	4	0|0|0|0|0|0|0|0|0|0|0|0|0|0|0|1	0.97	0.99	0.97	0.99	0.97	2.98	25	0.01		TRUE	Q99719	SEPTIN5	2	1.375	8	68	11.7647	TRUE	Q99719	SEPT5_HUMAN	Septin-5 (Cell division control-related protein 1) (CDCrel-1) (Peanut-like protein 1)	adult behavior [GO:0030534]; cytoskeleton-dependent cytokinesis [GO:0061640]; protein localization [GO:0008104]; regulation of exocytosis [GO:0017157]; regulation of synaptic vesicle exocytosis [GO:2000300]; social behavior [GO:0035176]; synaptic vesicle targeting [GO:0016080]	cell division site [GO:0032153]; microtubule cytoskeleton [GO:0015630]; plasma membrane [GO:0005886]; septin complex [GO:0031105]; septin ring [GO:0005940]; synaptic vesicle [GO:0008021]	GTP binding [GO:0005525]; GTPase activity [GO:0003924]; identical protein binding [GO:0042802]; molecular adaptor activity [GO:0060090]; structural molecule activity [GO:0005198]	SEPTIN5	Homo sapiens (Human)	369	42777	SUBCELLULAR LOCATION: Cytoplasm {ECO:0000250}. Cytoplasm, cytoskeleton {ECO:0000250}. Note=In platelets, found in areas surrounding alpha-granules.
N : WT	Q9H7E2	Q9H7E2	29|24|8|7	68	17	4	1|2|1|0|0|0|0|0|0|3|2|3|1|2|0|0	0.99	1	0.99	1	0.99	4.1	18.13	0		TRUE	Q9H7E2	TDRD3	7	1.85185	27	68	39.7059	TRUE	Q9H7E2	TDRD3_HUMAN	Tudor domain-containing protein 3	chromatin organization [GO:0006325]; DNA topological change [GO:0006265]	cytosol [GO:0005829]; DNA topoisomerase III-beta-TDRD3 complex [GO:0140225]; Golgi apparatus [GO:0005794]; nucleoplasm [GO:0005654]; nucleus [GO:0005634]	chromatin binding [GO:0003682]; methylated histone binding [GO:0035064]; RNA binding [GO:0003723]; transcription coactivator activity [GO:0003713]	TDRD3	Homo sapiens (Human)	651	73185	SUBCELLULAR LOCATION: Cytoplasm {ECO:0000269|PubMed:18632687}. Nucleus {ECO:0000269|PubMed:21172665}. Note=Predominantly cytoplasmic. Associated with actively translating polyribosomes and with mRNA stress granules. {ECO:0000269|PubMed:18632687, ECO:0000269|PubMed:18664458}.
N : WT	Q9H9G7	Q9H9G7	20|25|9|4	58	14.5	4	1|1|2|0|0|0|0|0|0|2|3|2|0|0|2|2	0.93	1	0.93	1	0.93	1.01	15.47	0.01		TRUE	Q9H9G7	AGO3	9	2.47059	17	68	25	TRUE	Q9H9G7	AGO3_HUMAN	Protein argonaute-3 (Argonaute3) (hAgo3) (EC 3.1.26.n2) (Argonaute RISC catalytic component 3) (Eukaryotic translation initiation factor 2C 3) (eIF-2C 3) (eIF2C 3)	miRNA processing [GO:0035196]; miRNA-mediated gene silencing by inhibition of translation [GO:0035278]; mRNA catabolic process [GO:0006402]; positive regulation of gene expression [GO:0010628]; positive regulation of NIK/NF-kappaB signaling [GO:1901224]; pre-miRNA processing [GO:0031054]; regulation of stem cell proliferation [GO:0072091]; RISC complex assembly [GO:0070922]; RNA secondary structu…	condensed nuclear chromosome [GO:0000794]; cytoplasm [GO:0005737]; cytoplasmic ribonucleoprotein granule [GO:0036464]; cytosol [GO:0005829]; membrane [GO:0016020]; nucleoplasm [GO:0005654]; P-body [GO:0000932]; RISC complex [GO:0016442]; RISC-loading complex [GO:0070578]	double-stranded RNA binding [GO:0003725]; endoribonuclease activity [GO:0004521]; endoribonuclease activity, cleaving miRNA-paired mRNA [GO:0090624]; metal ion binding [GO:0046872]; miRNA binding [GO:0035198]; RNA binding [GO:0003723]; single-stranded RNA binding [GO:0003727]	AGO3	Homo sapiens (Human)	860	97360	SUBCELLULAR LOCATION: Cytoplasm, P-body {ECO:0000255|HAMAP-Rule:MF_03032, ECO:0000269|PubMed:16081698}.
N : WT	Q9NQR4	Q9NQR4	5|8|6|8	27	6.75	4	2|1|1|0|0|0|0|0|0|1|1|1|5|2|1|0	0.92	0.98	0.92	0.98	0.92	1.45	7.2	0.01		TRUE	Q9NQR4	NIT2	5	1.57143	21	68	30.8824	TRUE	Q9NQR4	NIT2_HUMAN	Omega-amidase NIT2 (EC 3.5.1.3) (Nitrilase homolog 2)	asparagine metabolic process [GO:0006528]; glutamine metabolic process [GO:0006541]; oxaloacetate metabolic process [GO:0006107]	centrosome [GO:0005813]; cytosol [GO:0005829]; extracellular exosome [GO:0070062]; extracellular region [GO:0005576]; specific granule lumen [GO:0035580]; tertiary granule lumen [GO:1904724]	2-oxoglutaramate amidase activity [GO:0106008]; omega-amidase activity [GO:0050152]	NIT2	Homo sapiens (Human)	276	30608	SUBCELLULAR LOCATION: Cytoplasm {ECO:0000269|PubMed:17488281}.
N : WT	Q9NQS1	Q9NQS1	14|11|8|5	38	9.5	4	3|3|3|0|0|0|0|0|0|2|2|1|1|2|2|2	0.95	1	0.95	1	0.95	1.31	7.24	0.01		TRUE	Q9NQS1	AVEN	3	1.5	32	68	47.0588	TRUE	Q9NQS1	AVEN_HUMAN	Cell death regulator Aven	apoptotic process [GO:0006915]; negative regulation of apoptotic process [GO:0043066]; negative regulation of G2/M transition of mitotic cell cycle [GO:0010972]	cytosol [GO:0005829]; endomembrane system [GO:0012505]; membrane [GO:0016020]		AVEN	Homo sapiens (Human)	362	38506	SUBCELLULAR LOCATION: Endomembrane system; Peripheral membrane protein. Note=Associated with intracellular membranes.
N : WT	Q9UBQ7	Q9UBQ7	4|6|5|7	22	5.5	4	0|1|0|0|0|0|0|0|0|0|0|0|0|0|0|0	1	1	1	1	1	6.57	55	0		TRUE	Q9UBQ7	GRHPR	1	1	4	68	5.88235	TRUE	Q9UBQ7	GRHPR_HUMAN	Glyoxylate reductase/hydroxypyruvate reductase (EC 1.1.1.79) (EC 1.1.1.81)	carboxylic acid metabolic process [GO:0019752]; dicarboxylic acid metabolic process [GO:0043648]; glyoxylate metabolic process [GO:0046487]	catalytic complex [GO:1902494]; cytoplasm [GO:0005737]; cytosol [GO:0005829]; extracellular exosome [GO:0070062]; peroxisomal matrix [GO:0005782]	carboxylic acid binding [GO:0031406]; glycerate dehydrogenase activity [GO:0008465]; glyoxylate reductase (NADP+) activity [GO:0030267]; hydroxypyruvate reductase activity [GO:0016618]; NAD binding [GO:0051287]; NADPH binding [GO:0070402]; protein homodimerization activity [GO:0042803]	GRHPR	Homo sapiens (Human)	328	35668
N : WT	Q9Y2K5	Q9Y2K5	22|19|15|14	70	17.5	4	1|3|1|1|0|1|1|1|1|3|2|2|1|1|1|0	1	1	1	1	1	12.43	14	0		TRUE	Q9Y2K5	R3HDM2	3	1.23333	30	68	44.1176	TRUE	Q9Y2K5	R3HD2_HUMAN	R3H domain-containing protein 2		nucleus [GO:0005634]	RNA binding [GO:0003723]	R3HDM2	Homo sapiens (Human)	976	106999	SUBCELLULAR LOCATION: Nucleus {ECO:0000305}.
N : WT	Q9Y606	Q9Y606	9|7|8|12	36	9	4	0|0|0|1|2|1|2|1|0|1|2|0|0|0|0|0	1	1	1	1	1	8.7	14.4	0		TRUE	Q9Y606	PUS1	5	1.71429	21	68	30.8824	TRUE	Q9Y606	PUS1_HUMAN	Pseudouridylate synthase 1 homolog (EC 5.4.99.-) (tRNA pseudouridine synthase 1) (EC 5.4.99.12) (tRNA pseudouridine(38-40) synthase) (tRNA pseudouridylate synthase I) (tRNA-uridine isomerase I)	mitochondrial tRNA pseudouridine synthesis [GO:0070902]; mRNA processing [GO:0006397]; mRNA pseudouridine synthesis [GO:1990481]; RNA splicing [GO:0008380]; tRNA pseudouridine synthesis [GO:0031119]	cytoplasm [GO:0005737]; mitochondrial matrix [GO:0005759]; mitochondrion [GO:0005739]; nucleoplasm [GO:0005654]; nucleus [GO:0005634]	pseudouridine synthase activity [GO:0009982]; RNA binding [GO:0003723]; steroid receptor RNA activator RNA binding [GO:0002153]; tRNA binding [GO:0000049]; tRNA pseudouridine synthase activity [GO:0106029]	PUS1	Homo sapiens (Human)	427	47470	SUBCELLULAR LOCATION: [Isoform 1]: Mitochondrion {ECO:0000269|PubMed:17056637, ECO:0000305|PubMed:15772074}.; SUBCELLULAR LOCATION: [Isoform 2]: Nucleus {ECO:0000269|PubMed:17056637, ECO:0000305|PubMed:15772074}. Cytoplasm {ECO:0000305|PubMed:15772074}.
N : WT	Q9Y6E0	Q9Y6E0	4|4|8|12	28	7	4	0|0|0|0|0|0|0|0|0|1|2|2|0|0|0|0	0.98	1	0.98	1	0.98	3.07	22.4	0		TRUE	Q9Y6E0	STK24	3	1.5	10	68	14.7059	TRUE	Q9Y6E0	STK24_HUMAN	Serine/threonine-protein kinase 24 (EC 2.7.11.1) (Mammalian STE20-like protein kinase 3) (MST-3) (STE20-like kinase MST3) [Cleaved into: Serine/threonine-protein kinase 24 36 kDa subunit (Mammalian STE20-like protein kinase 3 N-terminal) (MST3/N); Serine/threonine-protein kinase 24 12 kDa subunit (Mammalian STE20-like protein kinase 3 C-terminal) (MST3/C)]	cellular response to starvation [GO:0009267]; execution phase of apoptosis [GO:0097194]; intrinsic apoptotic signaling pathway in response to oxidative stress [GO:0008631]; negative regulation of cell migration [GO:0030336]; positive regulation of axon regeneration [GO:0048680]; protein autophosphorylation [GO:0046777]; protein phosphorylation [GO:0006468]; regulation of axon regeneration [GO:004…	cytoplasm [GO:0005737]; cytosol [GO:0005829]; extracellular exosome [GO:0070062]; Golgi apparatus [GO:0005794]; Golgi membrane [GO:0000139]; nucleolus [GO:0005730]; nucleoplasm [GO:0005654]; nucleus [GO:0005634]	ATP binding [GO:0005524]; cadherin binding [GO:0045296]; metal ion binding [GO:0046872]; protein kinase activity [GO:0004672]; protein serine kinase activity [GO:0106310]; protein serine/threonine kinase activity [GO:0004674]	STK24	Homo sapiens (Human)	443	49308	SUBCELLULAR LOCATION: Cytoplasm. Nucleus. Membrane. Note=The truncated form (MST3/N) translocates to the nucleus. Colocalizes with STK38L in the membrane.
NSP12 : P323L	O43169	O43169	7|6|7|8	28	7	4	0|0|0|0|0|0|0|0|0|0|0|0|0|0|0|0	1	1	1	1	1	9.89	70	0		TRUE	O43169	CYB5B	2	1.14286	14	68	20.5882	TRUE	O43169	CYB5B_HUMAN	Cytochrome b5 type B (Cytochrome b5 outer mitochondrial membrane isoform)	nitric oxide biosynthetic process [GO:0006809]; response to oxidative stress [GO:0006979]; xenobiotic metabolic process [GO:0006805]	intracellular membrane-bounded organelle [GO:0043231]; membrane [GO:0016020]; mitochondrial outer membrane [GO:0005741]; nitric-oxide synthase complex [GO:1903958]	enzyme activator activity [GO:0008047]; heme binding [GO:0020037]; metal ion binding [GO:0046872]	CYB5B	Homo sapiens (Human)	150	16695	SUBCELLULAR LOCATION: Mitochondrion outer membrane {ECO:0000250|UniProtKB:P04166}.
NSP12 : P323L	O43291	O43291	5|4|6|7	22	5.5	4	0|0|0|0|0|0|0|0|0|0|0|0|0|0|1|1	1	1	1	1	1	6.12	44	0		TRUE	O43291	SPINT2	3	1.5	16	68	23.5294	TRUE	O43291	SPIT2_HUMAN	Kunitz-type protease inhibitor 2 (Hepatocyte growth factor activator inhibitor type 2) (HAI-2) (Placental bikunin)	basement membrane organization [GO:0071711]; cellular response to BMP stimulus [GO:0071773]; epithelial cell morphogenesis involved in placental branching [GO:0060672]; establishment or maintenance of cell polarity [GO:0007163]; negative regulation of cell motility [GO:2000146]; negative regulation of cell-cell adhesion [GO:0022408]; negative regulation of neural precursor cell proliferation [GO:…	cytoplasm [GO:0005737]; extracellular region [GO:0005576]; membrane [GO:0016020]; plasma membrane [GO:0005886]	endopeptidase inhibitor activity [GO:0004866]; serine-type endopeptidase inhibitor activity [GO:0004867]	SPINT2	Homo sapiens (Human)	252	28228	SUBCELLULAR LOCATION: Membrane {ECO:0000305}; Single-pass type I membrane protein {ECO:0000305}.
NSP12 : P323L	O43598	O43598	2|2|2|2	8	2	4	0|0|0|0|0|0|0|0|0|0|0|0|0|0|0|0	0.95	0.95	0.95	0.95	0.95	2.98	20	0.01		TRUE								TRUE	O43598	DNPH1_HUMAN	2'-deoxynucleoside 5'-phosphate N-hydrolase 1 (EC 3.2.2.-) (c-Myc-responsive protein RCL)	deoxyribonucleoside monophosphate catabolic process [GO:0009159]; epithelial cell differentiation [GO:0030855]; nucleoside metabolic process [GO:0009116]; positive regulation of cell growth [GO:0030307]; purine nucleotide catabolic process [GO:0006195]	cytosol [GO:0005829]; extracellular exosome [GO:0070062]; nucleus [GO:0005634]	deoxyribonucleoside 5'-monophosphate N-glycosidase activity [GO:0070694]; identical protein binding [GO:0042802]; protein homodimerization activity [GO:0042803]	DNPH1	Homo sapiens (Human)	174	19108	SUBCELLULAR LOCATION: Cytoplasm {ECO:0000255|HAMAP-Rule:MF_03036, ECO:0000269|PubMed:18726892}. Nucleus {ECO:0000255|HAMAP-Rule:MF_03036}.
NSP12 : P323L	O43854	O43854	3|2|5|5	15	3.75	4	0|0|0|0|0|0|0|0|0|0|0|0|0|0|0|0	0.99	1	0.99	1	0.99	2.98	37.5	0		TRUE								TRUE	O43854	EDIL3_HUMAN	EGF-like repeat and discoidin I-like domain-containing protein 3 (Developmentally-regulated endothelial cell locus 1 protein) (Integrin-binding protein DEL1)	cell adhesion [GO:0007155]; positive regulation of cell-substrate adhesion [GO:0010811]	collagen-containing extracellular matrix [GO:0062023]; extracellular exosome [GO:0070062]; extracellular vesicle [GO:1903561]	calcium ion binding [GO:0005509]; integrin binding [GO:0005178]	EDIL3	Homo sapiens (Human)	480	53765	SUBCELLULAR LOCATION: Secreted.
NSP12 : P323L	O60313	O60313	6|6|10|9	31	7.75	4	0|0|0|0|0|0|1|1|0|0|0|0|0|0|0|0	1	1	1	1	1	9.41	62	0		TRUE	O60313	OPA1	19	9.75	4	68	5.88235	TRUE	O60313	OPA1_HUMAN	Dynamin-like 120 kDa protein, mitochondrial (EC 3.6.5.5) (Optic atrophy protein 1) [Cleaved into: Dynamin-like 120 kDa protein, form S1]	apoptotic process [GO:0006915]; axonal transport of mitochondrion [GO:0019896]; cellular senescence [GO:0090398]; GTP metabolic process [GO:0046039]; inner mitochondrial membrane organization [GO:0007007]; membrane tubulation [GO:0097749]; mitochondrial fission [GO:0000266]; mitochondrial fusion [GO:0008053]; mitochondrial genome maintenance [GO:0000002]; mitochondrion organization [GO:0007005]; …	axon cytoplasm [GO:1904115]; cytoplasm [GO:0005737]; cytosol [GO:0005829]; dendrite [GO:0030425]; membrane [GO:0016020]; microtubule [GO:0005874]; mitochondrial crista [GO:0030061]; mitochondrial inner membrane [GO:0005743]; mitochondrial intermembrane space [GO:0005758]; mitochondrial membrane [GO:0031966]; mitochondrial outer membrane [GO:0005741]; mitochondrion [GO:0005739]; nucleoplasm [GO:00…	cardiolipin binding [GO:1901612]; GTP binding [GO:0005525]; GTPase activity [GO:0003924]; magnesium ion binding [GO:0000287]; microtubule binding [GO:0008017]; phosphatidic acid binding [GO:0070300]	OPA1	Homo sapiens (Human)	960	111631	SUBCELLULAR LOCATION: Mitochondrion inner membrane {ECO:0000269|PubMed:11017079, ECO:0000269|PubMed:16778770, ECO:0000269|PubMed:20974897, ECO:0000269|PubMed:28746876}; Single-pass membrane protein {ECO:0000255}. Mitochondrion intermembrane space {ECO:0000250|UniProtKB:P58281}. Mitochondrion membrane {ECO:0000269|PubMed:24616225}. Note=Detected at contact sites between endoplasmic reticulum and m…
NSP12 : P323L	O60488	O60488	5|4|6|2	17	4.25	4	0|0|0|0|0|0|0|0|0|0|0|0|0|0|0|0	0.99	1	0.99	1	0.99	2.98	42.5	0		TRUE	O60488	ACSL4	2	1.09091	11	68	16.1765	TRUE	O60488	ACSL4_HUMAN	Long-chain-fatty-acid--CoA ligase 4 (EC 6.2.1.3) (Arachidonate--CoA ligase) (EC 6.2.1.15) (Long-chain acyl-CoA synthetase 4) (LACS 4)	embryonic process involved in female pregnancy [GO:0060136]; fatty acid metabolic process [GO:0006631]; lipid biosynthetic process [GO:0008610]; lipid metabolic process [GO:0006629]; long-chain fatty acid metabolic process [GO:0001676]; long-chain fatty-acyl-CoA biosynthetic process [GO:0035338]; long-chain fatty-acyl-CoA metabolic process [GO:0035336]; negative regulation of prostaglandin secret…	cytoplasm [GO:0005737]; endoplasmic reticulum [GO:0005783]; endoplasmic reticulum membrane [GO:0005789]; extracellular exosome [GO:0070062]; lipid droplet [GO:0005811]; membrane [GO:0016020]; mitochondria-associated endoplasmic reticulum membrane [GO:0044233]; mitochondrial outer membrane [GO:0005741]; peroxisomal membrane [GO:0005778]; plasma membrane [GO:0005886]	arachidonate-CoA ligase activity [GO:0047676]; ATP binding [GO:0005524]; long-chain fatty acid-CoA ligase activity [GO:0004467]; palmitoyl-CoA ligase activity [GO:0090433]; very long-chain fatty acid-CoA ligase activity [GO:0031957]	ACSL4	Homo sapiens (Human)	711	79188	SUBCELLULAR LOCATION: Mitochondrion outer membrane {ECO:0000250}; Single-pass type III membrane protein {ECO:0000250}. Peroxisome membrane {ECO:0000250}; Single-pass type III membrane protein {ECO:0000250}. Microsome membrane {ECO:0000250}; Single-pass type III membrane protein {ECO:0000250}. Endoplasmic reticulum membrane {ECO:0000269|PubMed:24269233}; Single-pass type III membrane protein {ECO:…
[truncated: 5,257 more rows]

## Sheet: All interactions
Bait	Prey	PreyGene	Spec	SpecSum	AvgSpec	NumReplicates	ctrlCounts	AvgP	MaxP	TopoAvgP	TopoMaxP	SaintScore	logOddsScore	FoldChange	BFDR	boosted_by	Passes SAINT filter	PROTID	GENEID	Max_spc	Average_spc	n_positives	n_all	percentage	Passes crapome filter	Significant in one mutant or wild type
E : WT : P0DTC4	BirA-TAG	BirA-TAG	146|146|308|307	907	226.75	4	505|568|500|438|418|444|489|479|482|489|525|490|438|508|459|485	0	0	0	0	0	-inf	0.47	0.68		FALSE								TRUE	FALSE
[truncated: 205,744+ more rows]

## Sheet: Reactome BioID & Total proteome
Dataset	Category	term 1	term 2	Term 3	RT	Genes	Count	%	P-Value	Benjamini	Term 3
[truncated: 362 more rows]

## Sheet: Venn_Reactome terms
																	Names	total	elements
[truncated: 321 more rows]

## Sheet: Venn_Genes
																	Names	total	elements
[truncated: 1,280 more rows]
